# Supplementary material for: Characterizing Intercellular Communication of Pan-Cancer Reveals SPP1+ Tumor-Associated Macrophage Expanded in Hypoxia and Promoting Cancer Malignancy Through Single-Cell RNA-Seq Data
Source: Frontiers journal article supplement (doi:10.3389/fcell.2021.749210), 2021-10-05

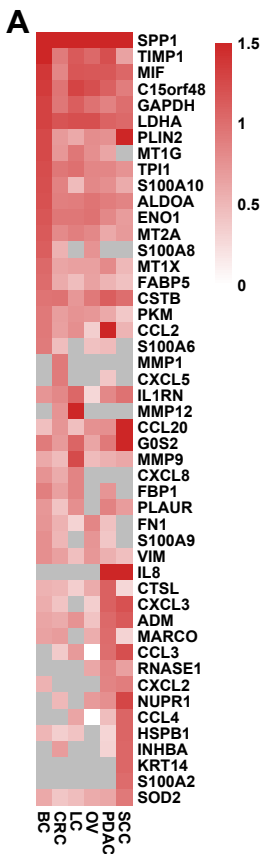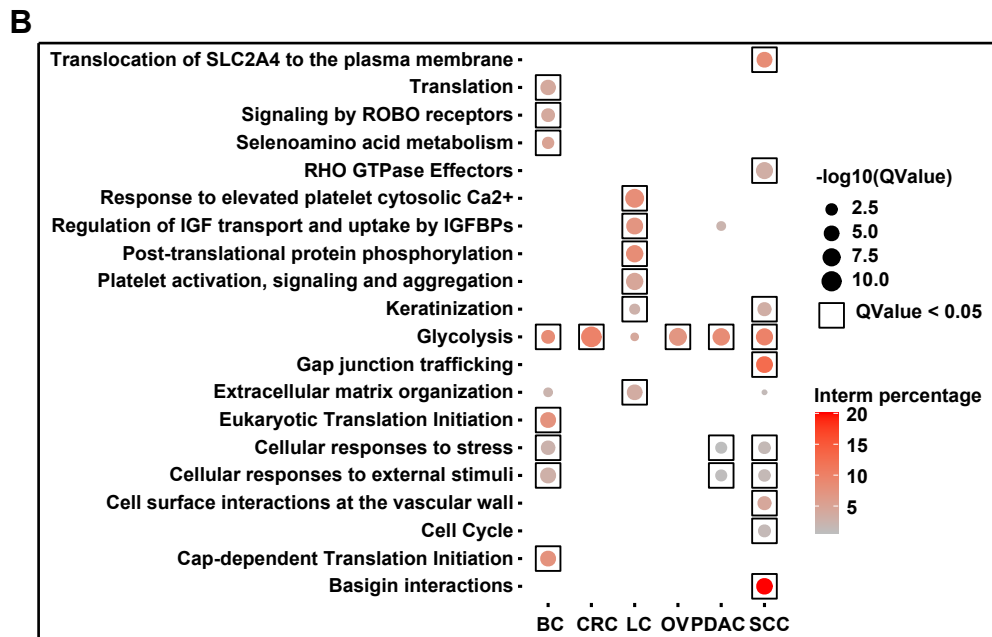

Supplement: Data_Sheet_9.PDF [file Data_Sheet_9.PDF]
