# Supplementary material for: Characterizing Intercellular Communication of Pan-Cancer Reveals SPP1+ Tumor-Associated Macrophage Expanded in Hypoxia and Promoting Cancer Malignancy Through Single-Cell RNA-Seq Data
Source: Front Cell Dev Biol. 2021 Oct 5;9:749210. doi: 10.3389/fcell.2021.749210 (PMC8523849; doi:10.3389/fcell.2021.749210)
Supplement: Supplementary file 1 [file Table_1.XLSX]

## Sheet: Table1-1
Table 1-1. The cell types and numbers across cancer types
# Cancer types
BC
	total number	cell proportion in tumor
B & Plasma cells	2100	0.0869205
Cancer cells	3539	0.146482
Endothelial cells	1067	0.0441639
Fibroblast cells	3981	0.164776
Mast cells	215	0.00889901
Myeloid cells	2176	0.0900662
T & NK cells	11082	0.458692
Total number	24160
CRC integrated
	total number	tumor	cell proportion in tumor	normal	crc	kul	smc
B & Plasma cells	15365	7057	0.12276	8308	4453	3704	7208
Endothelial cells	4660	2632	0.0457851	2028	1719	1417	1524
Epithelial cells	14642	14061	0.244599	581	2134	2234	10274
Fibroblast cells	13079	6858	0.119299	6221	5028	4454	3597
Mast cells	418	299	0.00520127	119	228	127	63
Myeloid cells	9610	8003	0.139217	1607	2408	2127	5075
T & NK cells	25030	18576	0.32314	6454	4954	4381	15695
Total number	82804	57486		25318	20924	18444	43436
LC
	total number	tumor	cell proportion in tumor	normal
Alveolar cells	2486	1114	0.0342674	1372
B & Plasma cells	3572	3350	0.103048	222
Cancer cells	4348	4338	0.13344	10
Endothelial cells	1598	725	0.0223015	873
Epithelial cells	282	178	0.00547541	104
Fibroblast cells	1290	1020	0.0313759	270
Mast cells	746	623	0.0191639	123
Myeloid cells	16696	8079	0.248516	8617
T & NK cells	17838	13082	0.402412	4756
Total number	48856	32509		16347
OvC
	total number	tumor	cell proportion in tumor	normal
B & Plasma cells	299	296	0.016693	3
Cancer cells	5726	5713	0.322186	13
Endothelial cells	1024	722	0.0407173	302
Fibroblast cells	9490	5236	0.295285	4254
Myeloid cells	4673	3608	0.203474	1065
T & NK cells	2539	2157	0.121644	382
Total number	23751	17732		6019
PDAC
	total number	tumor	cell proportion in tumor	normal
Acinar cells	1669	613	0.0149731	1056
B & Plasma cells	2345	2344	0.0572545	1
Endocrine cells	583	328	0.00801172	255
Endothelial cells	8800	4960	0.121153	3840
Epithelial cells	20827	13046	0.318661	7781
Fibroblast cells	6888	5956	0.145481	932
Myeloid cells	5649	5112	0.124866	537
Stellate cells	5524	4976	0.121544	548
T & NK cells	3099	3082	0.0752809	17
Unknown	547	523	0.0127748	24
Total number	55931	40940		14991
SCC
	total number	tumor	cell proportion in tumor	normal
B & Plasma cells	494	482	0.0187025	12
Endothelial cells	438	193	0.00748875	245
Epithelial cells	28744	12609	0.489252	16135
Fibroblast cells	942	710	0.0275493	232
Melanocyte cells	892	608	0.0235915	284
Myeloid cells	14123	9963	0.386582	4160
T & NK cells	1586	1207	0.0468338	379
Total number	47219	25772		21447

## Sheet: Table 1-2
Table 1-2. The cell types and their distribution in each patients across cancer types
BC
Patient ID	41	42	43	44	45	46	47	48	49	50	51	52	53	54
B & Plasma cells	147	116	486	407	312	3	2	33	21	28	296	7	240	2
Cancer cells	21	125	200	100	352	12	603	74	119	3	350	7	20	1553
Endothelial cells	193	24	40	127	301	13	20	90	43	24	66	9	18	99
Fibroblast cells	730	295	54	227	548	32	92	114	1492	18	248	6	33	92
Mast cells	5	16	4	3	4	1	0	1	21	0	1	0	153	6
Myeloid cells	124	91	658	82	136	8	93	114	168	209	324	69	33	67
T cells	1707	1229	1742	928	1459	32	92	432	235	396	1107	160	1525	38
CRC integrated
Patient ID	31	32	33	35	36	37	38	KUL01	KUL19	KUL21	KUL28	KUL30	KUL31	SMC01	SMC02	SMC03	SMC04	SMC05	SMC06	SMC07	SMC08	SMC09	SMC10	SMC11	SMC14	SMC15	SMC16	SMC17	SMC18	SMC19	SMC20	SMC21	SMC22	SMC23	SMC24	SMC25
B & Plasma cells	365	1718	330	680	294	308	758	331	1582	317	286	750	438	715	445	776	526	298	479	993	786	327	405	212	49	298	3	37	33	291	78	48	17	101	138	153
Endothelial cells	272	422	127	289	174	42	393	264	404	118	168	383	80	151	136	41	149	118	27	262	79	30	174	18	87	101	8	56	3	5	21	0	9	10	20	19
Epithelial cells	1031	329	629	85	20	20	20	1008	281	607	20	18	300	798	199	582	135	16	111	370	166	1055	260	228	61	99	1169	296	1038	138	340	1262	1428	198	233	92
Fibroblast cells	1190	982	1058	703	322	66	707	1164	971	1038	319	707	255	351	186	178	342	119	117	386	214	131	613	28	183	178	17	126	2	29	332	3	6	17	33	6
Mast cells	18	38	53	102	13	1	3	13	32	52	13	2	15	18	1	1	3	1	0	4	20	2	13	0	0	0	0	0	0	0	0	0	0	0	0	0
Myeloid cells	965	614	427	198	66	17	121	922	532	400	56	117	100	185	397	226	633	34	193	301	254	323	575	68	452	120	29	252	55	25	284	46	53	217	296	57
T & NK cells	943	2646	481	823	36	10	15	843	2454	454	33	13	584	1432	735	713	786	820	1583	1345	1524	667	707	653	565	676	84	186	104	625	223	443	270	532	589	433
LC
Patient ID	1	2	3	4	5	6	7	8
Alveolar cells	113	266	301	143	580	180	687	216
B & Plasma cells	85	84	265	510	474	414	255	1485
Cancer cells	0	1	727	1370	1820	421	9	0
Endothelial cells	0	19	454	60	302	93	189	481
Epithelial cells	0	1	29	8	133	64	27	20
Fibroblast cells	7	119	473	58	340	43	130	120
Mast cells	7	42	75	9	131	142	241	99
Myeloid cells	163	486	2416	1384	2984	1198	7280	785
T & NK cells	337	175	2106	3763	2914	1820	2881	3842
OvC
Patient ID	11	12	13	14	15
B & Plasma cells	8	4	231	49	7
Cancer cells	976	1101	532	3059	58
Endothelial cells	595	17	110	149	153
Fibroblast cells	5022	918	492	426	2632
Myeloid cells	2923	909	262	243	336
T & NK cells	933	259	755	116	476
PDAC
Patient ID	N1	N10	N11	N2	N3	N4	N5	N6	N7	N8	N9	T1	T10	T11	T12	T13	T14	T15	T16	T17	T18	T19	T2	T20	T21	T22	T23	T24	T3	T4	T5	T6	T7	T8	T9
Acinar cells	43	180	16	349	4	0	9	4	36	32	383	0	1	5	20	250	0	36	51	2	0	14	60	1	16	0	1	49	0	3	18	60	20	1	5
B & Plasma cells	0	0	0	0	0	0	0	0	0	1	0	13	112	3	579	12	2	165	11	10	1	5	964	0	25	229	102	1	12	74	1	7	3	13	0
Endocrine cells	21	5	2	31	19	6	6	6	65	42	52	45	2	15	1	9	3	13	12	4	3	69	2	7	0	2	38	31	6	8	22	29	1	0	6
Endothelial cells	505	219	761	290	111	201	197	327	197	350	682	320	126	44	247	410	82	290	277	114	156	792	240	89	31	27	176	490	175	52	292	394	110	21	5
Epithelial cells	1708	1035	462	766	171	715	627	231	729	370	967	423	93	327	143	615	1639	262	213	1374	974	427	451	296	254	1016	256	404	365	403	226	722	342	425	1396
Fibroblast cells	301	5	37	163	17	26	8	79	20	143	133	47	24	1722	72	195	63	486	336	139	164	122	68	0	32	29	1134	316	147	77	56	54	28	9	636
Myeloid cells	85	23	59	108	24	0	3	7	7	105	116	124	61	492	479	269	52	107	333	256	29	630	244	24	308	265	327	84	203	101	211	255	34	85	139
Stellate cells	130	14	15	52	49	17	25	52	45	111	38	130	250	396	296	207	92	411	287	58	168	568	152	30	36	77	405	301	296	101	215	218	159	38	85
T & NK cells	1	0	2	2	0	0	1	3	2	6	0	44	136	108	358	35	8	123	26	15	8	124	703	8	53	550	271	77	84	191	52	41	18	38	11
Unknown	7	0	0	6	3	0	0	0	0	2	6	2	3	15	54	17	1	11	17	17	1	117	19	0	14	10	124	34	7	2	2	33	1	16	6
SCC
Patient ID	P1	P10	P2	P3	P4	P5	P6	P7	P8	P9
B & Plasma cells	1	40	112	24	14	153	52	21	58	19
Endothelial cells	76	44	147	47	19	12	22	4	7	60
Epithelial cells	2119	2976	4279	165	5053	1096	4824	2747	1658	3827
Fibroblast cells	16	583	42	45	6	25	118	9	58	40
Melanocyte cells	123	50	164	3	475	5	11	26	8	27
Myeloid cells	2	799	1869	689	2333	861	1448	2578	1242	2302
T & NK cells	0	35	183	226	36	340	159	80	362	165

## Sheet: 1-3
Table 1-3. The DEGs for each cluster in CRC
# The genes in red are the marker genes in each cell types.
	p_val_mast	avg_logFC_mast	pct.1_mast	pct.2_mast	p_val_adj_mast	cluster_mast	gene_mast	p_val_wilcox	avg_logFC_wilcox	pct.1_wilcox	pct.2_wilcox	p_val_adj_wilcox	cluster_wilcox	gene_wilcox
CD3G	0	26.8317	0.563	0.117	0	0	CD3G	0	26.8317	0.563	0.117	0	0	CD3G	T & NK cells
CD3D	0	24.9263	0.723	0.115	0	0	CD3D	0	24.9263	0.723	0.115	0	0	CD3D
TRAC	0	24.0139	0.664	0.129	0	0	TRAC	0	24.0139	0.664	0.129	0	0	TRAC
TRBC2	0	23.9742	0.581	0.12	0	0	TRBC2	0	23.9742	0.581	0.12	0	0	TRBC2
STK17B	0	22.1627	0.6	0.237	0	0	STK17B	0	22.1627	0.6	0.237	0	0	STK17B
CLEC2D	0	21.7719	0.58	0.171	0	0	CLEC2D	0	21.7719	0.58	0.171	0	0	CLEC2D
RORA	0	18.2118	0.51	0.19	0	0	RORA	0	18.2118	0.51	0.19	0	0	RORA
CD2	0	17.2432	0.628	0.119	0	0	CD2	0	17.2432	0.628	0.119	0	0	CD2
CYTIP	0	16.0466	0.546	0.252	0	0	CYTIP	0	16.0466	0.546	0.252	0	0	CYTIP
CD3E	0	15.3229	0.708	0.115	0	0	CD3E	0	15.3229	0.708	0.115	0	0	CD3E
SRSF7	0	14.8981	0.558	0.269	0	0	SRSF7	0	14.8981	0.558	0.269	0	0	SRSF7
FYB	0	14.4802	0.575	0.185	0	0	FYB	0	14.4802	0.575	0.185	0	0	FYB
CD7	0	14.2504	0.611	0.115	0	0	CD7	0	14.2504	0.611	0.115	0	0	CD7
EVL	0	13.9812	0.619	0.201	0	0	EVL	0	13.9812	0.619	0.201	0	0	EVL
SAMSN1	0	13.1848	0.548	0.224	0	0	SAMSN1	0	13.1848	0.548	0.224	0	0	SAMSN1
SPOCK2	0	13.0463	0.597	0.134	0	0	SPOCK2	0	13.0463	0.597	0.134	0	0	SPOCK2
DUSP4	0	11.7399	0.501	0.159	0	0	DUSP4	0	11.7399	0.501	0.159	0	0	DUSP4
STK17A	0	10.8158	0.516	0.243	0	0	STK17A	0	10.8158	0.516	0.243	0	0	STK17A
ANKRD12	0	10.5069	0.538	0.294	0	0	ANKRD12	0	10.5069	0.538	0.294	0	0	ANKRD12
LEPROTL1	0	10.1609	0.684	0.182	0	0	LEPROTL1	0	10.1609	0.684	0.182	0	0	LEPROTL1
LCK	0	9.85825	0.594	0.129	0	0	LCK	0	9.85825	0.594	0.129	0	0	LCK
GNG2	0	9.11253	0.505	0.197	0	0	GNG2	0	9.11253	0.505	0.197	0	0	GNG2
FAM177A1	0	8.913	0.624	0.252	0	0	FAM177A1	0	8.913	0.624	0.252	0	0	FAM177A1
CREM	0	8.62528	0.717	0.198	0	0	CREM	0	8.62528	0.717	0.198	0	0	CREM
FYN	0	8.27678	0.657	0.203	0	0	FYN	0	8.27678	0.657	0.203	0	0	FYN
IL2RG	0	8.13359	0.623	0.21	0	0	IL2RG	0	8.13359	0.623	0.21	0	0	IL2RG
G3BP2	0	8.13141	0.519	0.25	0	0	G3BP2	0	8.13141	0.519	0.25	0	0	G3BP2
CNOT6L	0	7.99005	0.575	0.206	0	0	CNOT6L	0	7.99005	0.575	0.206	0	0	CNOT6L
PTPRC	0	7.60322	0.639	0.193	0	0	PTPRC	0	7.60322	0.639	0.193	0	0	PTPRC
PPP2R5C	0	7.45371	0.572	0.237	0	0	PPP2R5C	0	7.45371	0.572	0.237	0	0	PPP2R5C
EML4	0	5.73465	0.555	0.245	0	0	EML4	0	5.73465	0.555	0.245	0	0	EML4
ACAP1	0	5.66591	0.544	0.209	0	0	ACAP1	0	5.66591	0.544	0.209	0	0	ACAP1
ZFP36L2	0	5.6142	0.513	0.277	0	0	ZFP36L2	0	5.6142	0.513	0.277	0	0	ZFP36L2
SARAF	0	4.97364	0.706	0.168	0	0	SARAF	0	4.97364	0.706	0.168	0	0	SARAF
ISG20	0	4.88404	0.509	0.254	0	0	ISG20	0	4.88404	0.509	0.254	0	0	ISG20
GPSM3	0	4.61404	0.52	0.288	0	0	GPSM3	5.06984e-110	4.61404	0.52	0.288	3.0419e-106	0	GPSM3
TSC22D3	0	4.35172	0.546	0.267	0	0	TSC22D3	0	4.35172	0.546	0.267	0	0	TSC22D3
GMFG	0	4.20726	0.601	0.276	0	0	GMFG	0	4.20726	0.601	0.276	0	0	GMFG
ARHGDIB	0	4.20579	0.708	0.231	0	0	ARHGDIB	0	4.20579	0.708	0.231	0	0	ARHGDIB
RAC2	0	4.11716	0.631	0.228	0	0	RAC2	0	4.11716	0.631	0.228	0	0	RAC2
PDCD4	0	3.926	0.53	0.253	0	0	PDCD4	0	3.926	0.53	0.253	0	0	PDCD4
DDX24	0	3.27084	0.625	0.305	0	0	DDX24	0	3.27084	0.625	0.305	0	0	DDX24
ELF1	0	3.26074	0.556	0.294	0	0	ELF1	0	3.26074	0.556	0.294	0	0	ELF1
CDC42SE2	0	2.94428	0.575	0.24	0	0	CDC42SE2	0	2.94428	0.575	0.24	0	0	CDC42SE2
RARRES3	0	2.73621	0.589	0.245	0	0	RARRES3	0	2.73621	0.589	0.245	0	0	RARRES3
WIPF1	0	2.70176	0.519	0.286	0	0	WIPF1	0	2.70176	0.519	0.286	0	0	WIPF1
ARID4B	0	2.69811	0.53	0.31	0	0	ARID4B	0	2.69811	0.53	0.31	0	0	ARID4B
RP11-138A9.1	0	2.53126	0.501	0.267	0	0	RP11-138A9.1	2.9852e-242	2.53126	0.501	0.267	1.79112e-238	0	RP11-138A9.1
RHOH	0	2.49644	0.522	0.241	0	0	RHOH	0	2.49644	0.522	0.241	0	0	RHOH
STK4	0	2.40042	0.514	0.288	0	0	STK4	6.48213e-280	2.40042	0.514	0.288	3.88928e-276	0	STK4
IDS	0	2.31513	0.57	0.29	0	0	IDS	0	2.31513	0.57	0.29	0	0	IDS
BTG1	0	1.79388	0.626	0.234	0	0	BTG1	0	1.79388	0.626	0.234	0	0	BTG1
RPS29	0	1.35908	0.645	0.226	0	0	RPS29	0	1.35908	0.645	0.226	0	0	RPS29
CD52	0	1.20705	0.582	0.203	0	0	CD52	0	1.20705	0.582	0.203	0	0	CD52
IL32	0	1.1552	0.616	0.172	0	0	IL32	0	1.1552	0.616	0.172	0	0	IL32
CST7	0	1.10576	0.524	0.132	0	0	CST7	0	1.10576	0.524	0.132	0	0	CST7
CORO1A	0	1.05006	0.597	0.209	0	0	CORO1A	0	1.05006	0.597	0.209	0	0	CORO1A
HMGB2	0	1.02738	0.531	0.305	0	0	HMGB2	0	1.02738	0.531	0.305	0	0	HMGB2
MAL2	0	30.9618	0.556	0.224	0	1	MAL2	0	30.9618	0.556	0.224	0	1	MAL2	Epithelial cells
CEACAM6	0	30.5381	0.581	0.253	0	1	CEACAM6	0	30.5381	0.581	0.253	0	1	CEACAM6
S100A14	0	29.8112	0.583	0.249	0	1	S100A14	0	29.8112	0.583	0.249	0	1	S100A14
PRSS3	0	29.7384	0.593	0.25	0	1	PRSS3	0	29.7384	0.593	0.25	0	1	PRSS3
C19orf33	0	29.6041	0.561	0.177	0	1	C19orf33	0	29.6041	0.561	0.177	0	1	C19orf33
EPCAM	0	29.2592	0.7	0.231	0	1	EPCAM	0	29.2592	0.7	0.231	0	1	EPCAM
GPX2	0	29.1519	0.568	0.228	0	1	GPX2	0	29.1519	0.568	0.228	0	1	GPX2
ANXA4	0	29.1205	0.582	0.227	0	1	ANXA4	0	29.1205	0.582	0.227	0	1	ANXA4
CLDN7	0	29.0259	0.658	0.227	0	1	CLDN7	0	29.0259	0.658	0.227	0	1	CLDN7
MUC13	0	28.8457	0.557	0.228	0	1	MUC13	0	28.8457	0.557	0.228	0	1	MUC13
TSPAN8	0	28.6545	0.651	0.195	0	1	TSPAN8	0	28.6545	0.651	0.195	0	1	TSPAN8
TMEM45B	0	28.5581	0.542	0.296	0	1	TMEM45B	0	28.5581	0.542	0.296	0	1	TMEM45B
CYP3A5	0	28.2086	0.519	0.204	0	1	CYP3A5	4.88605e-274	28.2086	0.519	0.204	2.93163e-270	1	CYP3A5
CDC42EP5	0	28.2024	0.564	0.313	0	1	CDC42EP5	0	28.2024	0.564	0.313	0	1	CDC42EP5
SFN	0	28.1365	0.572	0.227	0	1	SFN	0	28.1365	0.572	0.227	0	1	SFN
S100P	0	28.1024	0.587	0.192	0	1	S100P	0	28.1024	0.587	0.192	0	1	S100P
CLDN3	0	28.0774	0.669	0.215	0	1	CLDN3	0	28.0774	0.669	0.215	0	1	CLDN3
TSPAN1	0	27.6422	0.508	0.224	0	1	TSPAN1	1.63397e-250	27.6422	0.508	0.224	9.8038e-247	1	TSPAN1
EBP	0	27.5833	0.524	0.199	0	1	EBP	0	27.5833	0.524	0.199	0	1	EBP
RBCK1	0	27.457	0.541	0.238	0	1	RBCK1	0	27.457	0.541	0.238	0	1	RBCK1
LGALS4	0	27.2913	0.641	0.21	0	1	LGALS4	0	27.2913	0.641	0.21	0	1	LGALS4
SERINC2	0	27.0546	0.58	0.227	0	1	SERINC2	0	27.0546	0.58	0.227	0	1	SERINC2
PDZK1IP1	0	26.9121	0.509	0.195	0	1	PDZK1IP1	1.1705e-238	26.9121	0.509	0.195	7.02298e-235	1	PDZK1IP1
MISP	0	26.8205	0.584	0.29	0	1	MISP	0	26.8205	0.584	0.29	0	1	MISP
ASS1	0	26.7015	0.537	0.26	0	1	ASS1	0	26.7015	0.537	0.26	0	1	ASS1
PRAP1	0	26.6847	0.51	0.239	0	1	PRAP1	2.57669e-152	26.6847	0.51	0.239	1.54602e-148	1	PRAP1
PRSS8	0	26.5283	0.558	0.264	0	1	PRSS8	0	26.5283	0.558	0.264	0	1	PRSS8
PERP	0	25.9001	0.637	0.212	0	1	PERP	0	25.9001	0.637	0.212	0	1	PERP
ATP1B1	0	25.6671	0.565	0.214	0	1	ATP1B1	0	25.6671	0.565	0.214	0	1	ATP1B1
NTHL1	0	25.5689	0.516	0.134	0	1	NTHL1	0	25.5689	0.516	0.134	0	1	NTHL1
SMIM22	0	24.6528	0.637	0.208	0	1	SMIM22	0	24.6528	0.637	0.208	0	1	SMIM22
TRIM31	0	24.4279	0.52	0.232	0	1	TRIM31	8.62346e-246	24.4279	0.52	0.232	5.17408e-242	1	TRIM31
LAMB3	0	24.3129	0.513	0.194	0	1	LAMB3	0	24.3129	0.513	0.194	0	1	LAMB3
CLDN4	0	24.2865	0.65	0.211	0	1	CLDN4	0	24.2865	0.65	0.211	0	1	CLDN4
CD24	0	24.2693	0.677	0.199	0	1	CD24	0	24.2693	0.677	0.199	0	1	CD24
S100A16	0	24.1909	0.575	0.254	0	1	S100A16	0	24.1909	0.575	0.254	0	1	S100A16
MYH14	0	23.6309	0.566	0.29	0	1	MYH14	0	23.6309	0.566	0.29	0	1	MYH14
FGB	0	23.5766	0.173	0.505	0	1	FGB	0	23.5766	0.173	0.505	0	1	FGB
FAM3D	0	23.5664	0.573	0.235	0	1	FAM3D	0	23.5664	0.573	0.235	0	1	FAM3D
TMC5	0	23.005	0.538	0.263	0	1	TMC5	0	23.005	0.538	0.263	0	1	TMC5
KCNK1	0	22.4977	0.503	0.246	0	1	KCNK1	3.31282e-110	22.4977	0.503	0.246	1.98769e-106	1	KCNK1
AGR2	0	22.4456	0.556	0.196	0	1	AGR2	0	22.4456	0.556	0.196	0	1	AGR2
GGH	0	21.9306	0.518	0.256	0	1	GGH	3.31646e-251	21.9306	0.518	0.256	1.98987e-247	1	GGH
SLC39A4	0	21.6913	0.602	0.101	0	1	SLC39A4	0	21.6913	0.602	0.101	0	1	SLC39A4
S100A11	0	21.5859	0.538	0.317	0	1	S100A11	0	21.5859	0.538	0.317	0	1	S100A11
GOLM1	0	21.5483	0.506	0.247	0	1	GOLM1	2.19253e-112	21.5483	0.506	0.247	1.31552e-108	1	GOLM1
ZFAS1	0	21.4056	0.587	0.309	0	1	ZFAS1	0	21.4056	0.587	0.309	0	1	ZFAS1
TMBIM1	0	20.94	0.544	0.213	0	1	TMBIM1	0	20.94	0.544	0.213	0	1	TMBIM1
MUC12	0	20.8981	0.508	0.197	0	1	MUC12	1.77868e-189	20.8981	0.508	0.197	1.06721e-185	1	MUC12
NQO1	0	20.8788	0.54	0.249	0	1	NQO1	0	20.8788	0.54	0.249	0	1	NQO1
SLC22A18	0	20.2727	0.559	0.1	0	1	SLC22A18	0	20.2727	0.559	0.1	0	1	SLC22A18
KRT19	0	19.7714	0.643	0.218	0	1	KRT19	0	19.7714	0.643	0.218	0	1	KRT19
TMEM54	0	19.4112	0.606	0.285	0	1	TMEM54	0	19.4112	0.606	0.285	0	1	TMEM54
FXYD3	0	19.2558	0.588	0.181	0	1	FXYD3	0	19.2558	0.588	0.181	0	1	FXYD3
TMPRSS2	0	18.9857	0.529	0.244	0	1	TMPRSS2	7.03815e-272	18.9857	0.529	0.244	4.22289e-268	1	TMPRSS2
DSG2	0	18.9118	0.602	0.248	0	1	DSG2	0	18.9118	0.602	0.248	0	1	DSG2
CYSTM1	0	18.4868	0.592	0.227	0	1	CYSTM1	0	18.4868	0.592	0.227	0	1	CYSTM1
ELF3	0	18.4152	0.65	0.199	0	1	ELF3	0	18.4152	0.65	0.199	0	1	ELF3
KRT8	0	18.2054	0.708	0.219	0	1	KRT8	0	18.2054	0.708	0.219	0	1	KRT8
ALDOA	0	17.5886	0.615	0.311	0	1	ALDOA	0	17.5886	0.615	0.311	0	1	ALDOA
CEACAM5	0	17.5705	0.677	0.244	0	1	CEACAM5	0	17.5705	0.677	0.244	0	1	CEACAM5
DSC2	0	17.5161	0.532	0.218	0	1	DSC2	4.81111e-242	17.5161	0.532	0.218	2.88667e-238	1	DSC2
LIPH	0	17.2172	0.512	0.233	0	1	LIPH	8.09403e-123	17.2172	0.512	0.233	4.85642e-119	1	LIPH
SDC4	0	17.0375	0.523	0.189	0	1	SDC4	0	17.0375	0.523	0.189	0	1	SDC4
KRT18	0	16.9974	0.703	0.242	0	1	KRT18	0	16.9974	0.703	0.242	0	1	KRT18
EHF	0	16.5786	0.581	0.012	0	1	EHF	0	16.5786	0.581	0.012	0	1	EHF
SOX9	0	16.4796	0.549	0.25	0	1	SOX9	0	16.4796	0.549	0.25	0	1	SOX9
TPD52L1	0	16.0379	0.504	0.063	0	1	TPD52L1	0	16.0379	0.504	0.063	0	1	TPD52L1
PPDPF	0	14.5523	0.687	0.282	0	1	PPDPF	0	14.5523	0.687	0.282	0	1	PPDPF
TSPAN3	0	14.5165	0.668	0.161	0	1	TSPAN3	0	14.5165	0.668	0.161	0	1	TSPAN3
SPINT1	0	14.4864	0.7	0.053	0	1	SPINT1	0	14.4864	0.7	0.053	0	1	SPINT1
AKR7A3	0	14.4364	0.515	0.019	0	1	AKR7A3	0	14.4364	0.515	0.019	0	1	AKR7A3
ANXA2	0	14.4245	0.557	0.328	0	1	ANXA2	0	14.4245	0.557	0.328	0	1	ANXA2
RP11-357H14.17	0	14.3645	0.509	0.19	0	1	RP11-357H14.17	1.03905e-181	14.3645	0.509	0.19	6.23431e-178	1	RP11-357H14.17
OCLN	0	14.3594	0.523	0.033	0	1	OCLN	0	14.3594	0.523	0.033	0	1	OCLN
LMO7	0	14.3335	0.543	0.213	0	1	LMO7	0	14.3335	0.543	0.213	0	1	LMO7
ETHE1	0	14.307	0.723	0.18	0	1	ETHE1	0	14.307	0.723	0.18	0	1	ETHE1
GPRC5A	0	14.1872	0.602	0.269	0	1	GPRC5A	0	14.1872	0.602	0.269	0	1	GPRC5A
SPINT2	0	14.165	0.696	0.206	0	1	SPINT2	0	14.165	0.696	0.206	0	1	SPINT2
DPEP1	0	13.8391	0.529	0.29	0	1	DPEP1	2.49359e-231	13.8391	0.529	0.29	1.49616e-227	1	DPEP1
PRR15L	0	13.8157	0.55	0.019	0	1	PRR15L	0	13.8157	0.55	0.019	0	1	PRR15L
PHLDA2	0	13.744	0.632	0.205	0	1	PHLDA2	0	13.744	0.632	0.205	0	1	PHLDA2
FAM84A	0	13.722	0.504	0.266	0	1	FAM84A	4.80305e-206	13.722	0.504	0.266	2.88183e-202	1	FAM84A
TINAGL1	0	13.6369	0.562	0.184	0	1	TINAGL1	0	13.6369	0.562	0.184	0	1	TINAGL1
HN1	0	13.6189	0.676	0.266	0	1	HN1	0	13.6189	0.676	0.266	0	1	HN1
MUC3A	0	13.3468	0.661	0.016	0	1	MUC3A	0	13.3468	0.661	0.016	0	1	MUC3A
GSTP1	0	13.282	0.639	0.32	0	1	GSTP1	0	13.282	0.639	0.32	0	1	GSTP1
USH1C	0	13.2345	0.649	0.015	0	1	USH1C	0	13.2345	0.649	0.015	0	1	USH1C
RAB25	0	13.2237	0.634	0.26	0	1	RAB25	0	13.2237	0.634	0.26	0	1	RAB25
KLF5	0	12.8866	0.582	0.26	0	1	KLF5	0	12.8866	0.582	0.26	0	1	KLF5
CRB3	0	12.6123	0.635	0.02	0	1	CRB3	0	12.6123	0.635	0.02	0	1	CRB3
TST	0	12.5736	0.559	0.061	0	1	TST	0	12.5736	0.559	0.061	0	1	TST
CDH17	0	12.5056	0.569	0.287	0	1	CDH17	0	12.5056	0.569	0.287	0	1	CDH17
CAMK2N1	0	12.2315	0.599	0.294	0	1	CAMK2N1	0	12.2315	0.599	0.294	0	1	CAMK2N1
LSR	0	12.1964	0.614	0.228	0	1	LSR	0	12.1964	0.614	0.228	0	1	LSR
CXADR	0	11.3601	0.59	0.226	0	1	CXADR	0	11.3601	0.59	0.226	0	1	CXADR
LGALS3	0	11.2547	0.594	0.269	0	1	LGALS3	0	11.2547	0.594	0.269	0	1	LGALS3
CDH1	0	11.1328	0.703	0.028	0	1	CDH1	0	11.1328	0.703	0.028	0	1	CDH1
PLS1	0	10.938	0.54	0.029	0	1	PLS1	0	10.938	0.54	0.029	0	1	PLS1
PKP3	0	10.801	0.709	0.028	0	1	PKP3	0	10.801	0.709	0.028	0	1	PKP3
FHL2	0	10.5631	0.608	0.202	0	1	FHL2	0	10.5631	0.608	0.202	0	1	FHL2
ST14	0	10.4568	0.693	0.062	0	1	ST14	0	10.4568	0.693	0.062	0	1	ST14
JUP	0	10.3228	0.682	0.079	0	1	JUP	0	10.3228	0.682	0.079	0	1	JUP
AGPAT2	0	10.2316	0.596	0.235	0	1	AGPAT2	0	10.2316	0.596	0.235	0	1	AGPAT2
KRTCAP3	0	10.2115	0.67	0.024	0	1	KRTCAP3	0	10.2115	0.67	0.024	0	1	KRTCAP3
LLGL2	0	10.211	0.66	0.05	0	1	LLGL2	0	10.211	0.66	0.05	0	1	LLGL2
GAPDH	0	10.1617	0.663	0.294	0	1	GAPDH	0	10.1617	0.663	0.294	0	1	GAPDH
B3GNT3	0	10.0731	0.509	0.017	0	1	B3GNT3	0	10.0731	0.509	0.017	0	1	B3GNT3
MALL	0	9.99179	0.505	0.185	0	1	MALL	1.35437e-150	9.99179	0.505	0.185	8.12624e-147	1	MALL
IFT172	0	9.95036	0.568	0.038	0	1	IFT172	0	9.95036	0.568	0.038	0	1	IFT172
ABCC3	0	9.85811	0.516	0.065	0	1	ABCC3	0	9.85811	0.516	0.065	0	1	ABCC3
EPS8L3	0	9.39622	0.584	0.027	0	1	EPS8L3	0	9.39622	0.584	0.027	0	1	EPS8L3
FUT3	0	9.34286	0.536	0.026	0	1	FUT3	0	9.34286	0.536	0.026	0	1	FUT3
SLC44A4	0	8.90042	0.633	0.029	0	1	SLC44A4	0	8.90042	0.633	0.029	0	1	SLC44A4
ABHD11	0	8.87065	0.654	0.067	0	1	ABHD11	0	8.87065	0.654	0.067	0	1	ABHD11
SH3YL1	0	8.74569	0.706	0.091	0	1	SH3YL1	0	8.74569	0.706	0.091	0	1	SH3YL1
STARD10	0	8.67769	0.684	0.079	0	1	STARD10	0	8.67769	0.684	0.079	0	1	STARD10
MGST1	0	8.57747	0.613	0.267	0	1	MGST1	0	8.57747	0.613	0.267	0	1	MGST1
TMEM141	0	8.54848	0.577	0.242	0	1	TMEM141	0	8.54848	0.577	0.242	0	1	TMEM141
SNHG25	0	8.5127	0.515	0.183	0	1	SNHG25	0	8.5127	0.515	0.183	0	1	SNHG25
H2AFJ	0	8.4888	0.566	0.297	0	1	H2AFJ	0	8.4888	0.566	0.297	0	1	H2AFJ
DSP	0	8.35929	0.691	0.028	0	1	DSP	0	8.35929	0.691	0.028	0	1	DSP
TMPRSS4	0	8.32761	0.572	0.025	0	1	TMPRSS4	0	8.32761	0.572	0.025	0	1	TMPRSS4
PLPP2	0	7.97249	0.594	0.307	0	1	PLPP2	0	7.97249	0.594	0.307	0	1	PLPP2
ACTG1	0	7.81045	0.666	0.368	0	1	ACTG1	0	7.81045	0.666	0.368	0	1	ACTG1
PPP1R1B	0	7.53434	0.553	0.279	0	1	PPP1R1B	0	7.53434	0.553	0.279	0	1	PPP1R1B
NAPRT	0	7.48381	0.555	0.164	0	1	NAPRT	0	7.48381	0.555	0.164	0	1	NAPRT
GDF15	0	7.47871	0.535	0.234	0	1	GDF15	0	7.47871	0.535	0.234	0	1	GDF15
STAP2	0	7.34225	0.623	0.047	0	1	STAP2	0	7.34225	0.623	0.047	0	1	STAP2
S100A6	0	7.25773	0.652	0.275	0	1	S100A6	0	7.25773	0.652	0.275	0	1	S100A6
TFF3	0	7.07766	0.574	0.147	0	1	TFF3	0	7.07766	0.574	0.147	0	1	TFF3
AP1M2	0	6.94569	0.661	0.016	0	1	AP1M2	0	6.94569	0.661	0.016	0	1	AP1M2
SEC61G	0	6.7955	0.601	0.361	0	1	SEC61G	0	6.7955	0.601	0.361	0	1	SEC61G
SLC12A2	0	6.7404	0.555	0.245	0	1	SLC12A2	0	6.7404	0.555	0.245	0	1	SLC12A2
CCND1	0	6.53044	0.519	0.243	0	1	CCND1	1.13998e-235	6.53044	0.519	0.243	6.83989e-232	1	CCND1
ITGB4	0	6.48159	0.573	0.06	0	1	ITGB4	0	6.48159	0.573	0.06	0	1	ITGB4
S100A10	0	6.3086	0.641	0.289	0	1	S100A10	0	6.3086	0.641	0.289	0	1	S100A10
RP11-532F12.5	0	6.26734	0.558	0.034	0	1	RP11-532F12.5	0	6.26734	0.558	0.034	0	1	RP11-532F12.5
EPHA2	0	5.56306	0.562	0.274	0	1	EPHA2	0	5.56306	0.562	0.274	0	1	EPHA2
SPINK1	0	5.2165	0.518	0.178	0	1	SPINK1	1.10235e-212	5.2165	0.518	0.178	6.61409e-209	1	SPINK1
OCIAD2	0	5.03108	0.648	0.235	0	1	OCIAD2	0	5.03108	0.648	0.235	0	1	OCIAD2
ANXA3	0	4.92006	0.55	0.25	0	1	ANXA3	0	4.92006	0.55	0.25	0	1	ANXA3
PHGR1	0	4.91835	0.568	0.221	0	1	PHGR1	0	4.91835	0.568	0.221	0	1	PHGR1
ERBB3	0	4.3109	0.638	0.029	0	1	ERBB3	0	4.3109	0.638	0.029	0	1	ERBB3
SLC25A5	0	3.57316	0.587	0.314	0	1	SLC25A5	0	3.57316	0.587	0.314	0	1	SLC25A5
MDK	0	3.22384	0.559	0.173	0	1	MDK	0	3.22384	0.559	0.173	0	1	MDK
NDFIP2	0	3.0239	0.602	0.135	0	1	NDFIP2	0	3.0239	0.602	0.135	0	1	NDFIP2
AK1	0	2.83644	0.537	0.176	0	1	AK1	0	2.83644	0.537	0.176	0	1	AK1
MARCKSL1	0	2.734	0.596	0.239	0	1	MARCKSL1	0	2.734	0.596	0.239	0	1	MARCKSL1
IFI27	0	2.60954	0.52	0.203	0	1	IFI27	5.27577e-269	2.60954	0.52	0.203	3.16546e-265	1	IFI27
CHCHD10	0	2.57146	0.608	0.279	0	1	CHCHD10	0	2.57146	0.608	0.279	0	1	CHCHD10
CSTB	0	2.51778	0.526	0.241	0	1	CSTB	0	2.51778	0.526	0.241	0	1	CSTB
CDX1	0	2.34691	0.566	0.289	0	1	CDX1	0	2.34691	0.566	0.289	0	1	CDX1
IGFBP2	0	2.29516	0.549	0.232	0	1	IGFBP2	0	2.29516	0.549	0.232	0	1	IGFBP2
TNFRSF12A	0	2.15158	0.574	0.222	0	1	TNFRSF12A	0	2.15158	0.574	0.222	0	1	TNFRSF12A
LDLR	0	1.81768	0.507	0.219	0	1	LDLR	1.36882e-211	1.81768	0.507	0.219	8.21291e-208	1	LDLR
VIL11	0	1.7645	0.559	0.293	0	1	VIL1	0	1.7645	0.559	0.293	0	1	VIL1
RAB11FIP1	0	1.73375	0.533	0.185	0	1	RAB11FIP1	0	1.73375	0.533	0.185	0	1	RAB11FIP1
RAC1	0	1.73	0.839	0.296	0	1	RAC1	0	1.73	0.839	0.296	0	1	RAC1
SLPI	0	1.62714	0.501	0.167	0	1	SLPI	9.16488e-196	1.62714	0.501	0.167	5.49893e-192	1	SLPI
ERRFI1	0	1.48247	0.508	0.195	0	1	ERRFI1	1.91558e-189	1.48247	0.508	0.195	1.14935e-185	1	ERRFI1
LAD1	0	1.45114	0.688	0.019	0	1	LAD1	0	1.45114	0.688	0.019	0	1	LAD1
MIF	0	1.43746	0.687	0.303	0	1	MIF	0	1.43746	0.687	0.303	0	1	MIF
LDHA	0	1.404	0.546	0.337	0	1	LDHA	0	1.404	0.546	0.337	0	1	LDHA
EPS8	0	1.28969	0.589	0.111	0	1	EPS8	0	1.28969	0.589	0.111	0	1	EPS8
HMGA1	0	1.23905	0.607	0.232	0	1	HMGA1	0	1.23905	0.607	0.232	0	1	HMGA1
RBM47	0	1.16797	0.577	0.109	0	1	RBM47	0	1.16797	0.577	0.109	0	1	RBM47
MGST2	0	1.0787	0.634	0.165	0	1	MGST2	0	1.0787	0.634	0.165	0	1	MGST2
LOXL1	0	38.1651	0.81	0.052	0	2	LOXL1	0	38.1651	0.81	0.052	0	2	LOXL1	Fibroblast cells
CFH	0	35.7628	0.834	0.064	0	2	CFH	0	35.7628	0.834	0.064	0	2	CFH
SCARA5	0	32.8916	0.511	0.026	0	2	SCARA5	0	32.8916	0.511	0.026	0	2	SCARA5
FBLN1	0	32.4457	0.827	0.035	0	2	FBLN1	0	32.4457	0.827	0.035	0	2	FBLN1
CD248	0	30.3476	0.729	0.042	0	2	CD248	0	30.3476	0.729	0.042	0	2	CD248
FBN1	0	29.6566	0.765	0.069	0	2	FBN1	0	29.6566	0.765	0.069	0	2	FBN1
FNDC1	0	29.5744	0.524	0.079	0	2	FNDC1	0	29.5744	0.524	0.079	0	2	FNDC1
FENDRR	0	29.1912	0.572	0.035	0	2	FENDRR	0	29.1912	0.572	0.035	0	2	FENDRR
PCDH18	0	28.4838	0.616	0.023	0	2	PCDH18	0	28.4838	0.616	0.023	0	2	PCDH18
LINC01082	0	28.1085	0.582	0.024	0	2	LINC01082	0	28.1085	0.582	0.024	0	2	LINC01082
GSTM5	0	28.0067	0.576	0.041	0	2	GSTM5	0	28.0067	0.576	0.041	0	2	GSTM5
EMILIN1	0	27.7238	0.835	0.037	0	2	EMILIN1	0	27.7238	0.835	0.037	0	2	EMILIN1
SVEP1	0	27.5738	0.56	0.03	0	2	SVEP1	0	27.5738	0.56	0.03	0	2	SVEP1
SFRP2	0	27.5625	0.597	0.063	0	2	SFRP2	0	27.5625	0.597	0.063	0	2	SFRP2
ADAMTS2	0	27.4418	0.691	0.057	0	2	ADAMTS2	0	27.4418	0.691	0.057	0	2	ADAMTS2
BICC1	0	27.3212	0.68	0.048	0	2	BICC1	0	27.3212	0.68	0.048	0	2	BICC1
COL5A2	0	27.1352	0.803	0.071	0	2	COL5A2	0	27.1352	0.803	0.071	0	2	COL5A2
PODN	0	26.9769	0.602	0.047	0	2	PODN	0	26.9769	0.602	0.047	0	2	PODN
CPXM1	0	26.8632	0.636	0.083	0	2	CPXM1	0	26.8632	0.636	0.083	0	2	CPXM1
BDKRB1	0	26.8149	0.594	0.058	0	2	BDKRB1	0	26.8149	0.594	0.058	0	2	BDKRB1
ANTXR1	0	26.7984	0.802	0.069	0	2	ANTXR1	0	26.7984	0.802	0.069	0	2	ANTXR1
CCL11	0	26.6787	0.519	0.027	0	2	CCL11	0	26.6787	0.519	0.027	0	2	CCL11
ADAMTS12	0	26.6057	0.539	0.063	0	2	ADAMTS12	0	26.6057	0.539	0.063	0	2	ADAMTS12
DCLK1	0	26.1991	0.534	0.034	0	2	DCLK1	0	26.1991	0.534	0.034	0	2	DCLK1
CDH11	0	25.9902	0.691	0.05	0	2	CDH11	0	25.9902	0.691	0.05	0	2	CDH11
C1S	0	25.9338	0.95	0.045	0	2	C1S	0	25.9338	0.95	0.045	0	2	C1S
PROCR	0	25.8809	0.7	0.117	0	2	PROCR	0	25.8809	0.7	0.117	0	2	PROCR
NBL1	0	25.7223	0.782	0.178	0	2	NBL1	0	25.7223	0.782	0.178	0	2	NBL1
RCN3	0	25.5305	0.823	0.09	0	2	RCN3	0	25.5305	0.823	0.09	0	2	RCN3
SLIT3	0	25.4631	0.588	0.031	0	2	SLIT3	0	25.4631	0.588	0.031	0	2	SLIT3
ACTN1	0	25.3228	0.65	0.199	0	2	ACTN1	0	25.3228	0.65	0.199	0	2	ACTN1
TCF21	0	25.2624	0.736	0.025	0	2	TCF21	0	25.2624	0.736	0.025	0	2	TCF21
PALLD	0	24.7444	0.737	0.085	0	2	PALLD	0	24.7444	0.737	0.085	0	2	PALLD
CCDC71L	0	24.7318	0.595	0.131	0	2	CCDC71L	0	24.7318	0.595	0.131	0	2	CCDC71L
PLEKHH2	0	24.7167	0.607	0.034	0	2	PLEKHH2	0	24.7167	0.607	0.034	0	2	PLEKHH2
BOC	0	24.6298	0.591	0.055	0	2	BOC	0	24.6298	0.591	0.055	0	2	BOC
LSAMP	0	24.6028	0.583	0.045	0	2	LSAMP	0	24.6028	0.583	0.045	0	2	LSAMP
BMP1	0	24.5102	0.634	0.082	0	2	BMP1	0	24.5102	0.634	0.082	0	2	BMP1
NEXN	0	24.1523	0.667	0.036	0	2	NEXN	0	24.1523	0.667	0.036	0	2	NEXN
HSPB6	0	23.9957	0.578	0.035	0	2	HSPB6	0	23.9957	0.578	0.035	0	2	HSPB6
APLP2	0	23.9528	0.555	0.296	0	2	APLP2	0	23.9528	0.555	0.296	0	2	APLP2
GPC6	0	23.9364	0.737	0.026	0	2	GPC6	0	23.9364	0.737	0.026	0	2	GPC6
GGT5	0	23.55	0.69	0.045	0	2	GGT5	0	23.55	0.69	0.045	0	2	GGT5
C3	0	23.4134	0.641	0.072	0	2	C3	0	23.4134	0.641	0.072	0	2	C3
FGF7	0	23.2838	0.761	0.051	0	2	FGF7	0	23.2838	0.761	0.051	0	2	FGF7
ADGRA2	0	23.2804	0.672	0.054	0	2	ADGRA2	0	23.2804	0.672	0.054	0	2	ADGRA2
MAPKAP1	0	23.1647	0.518	0.215	0	2	MAPKAP1	0	23.1647	0.518	0.215	0	2	MAPKAP1
CERCAM	0	23.0866	0.846	0.118	0	2	CERCAM	0	23.0866	0.846	0.118	0	2	CERCAM
EFEMP2	0	22.9162	0.908	0.073	0	2	EFEMP2	0	22.9162	0.908	0.073	0	2	EFEMP2
SELM	0	22.7804	0.975	0.204	0	2	SELM	0	22.7804	0.975	0.204	0	2	SELM
COL14A1	0	22.5826	0.77	0.035	0	2	COL14A1	0	22.5826	0.77	0.035	0	2	COL14A1
TGFB3	0	22.4023	0.601	0.072	0	2	TGFB3	0	22.4023	0.601	0.072	0	2	TGFB3
MFAP4	0	22.3838	0.832	0.035	0	2	MFAP4	0	22.3838	0.832	0.035	0	2	MFAP4
VASN	0	22.3224	0.835	0.035	0	2	VASN	0	22.3224	0.835	0.035	0	2	VASN
PDGFRL	0	22.1289	0.531	0.072	0	2	PDGFRL	0	22.1289	0.531	0.072	0	2	PDGFRL
LTBP1	0	21.9219	0.543	0.077	0	2	LTBP1	0	21.9219	0.543	0.077	0	2	LTBP1
FGFR1	0	21.8121	0.821	0.095	0	2	FGFR1	0	21.8121	0.821	0.095	0	2	FGFR1
FLNA	0	21.5882	0.676	0.272	0	2	FLNA	0	21.5882	0.676	0.272	0	2	FLNA
LAMA2	0	21.5489	0.561	0.045	0	2	LAMA2	0	21.5489	0.561	0.045	0	2	LAMA2
PAMR1	0	21.2707	0.52	0.039	0	2	PAMR1	0	21.2707	0.52	0.039	0	2	PAMR1
TIMP2	0	21.2461	0.888	0.171	0	2	TIMP2	0	21.2461	0.888	0.171	0	2	TIMP2
MFGE8	0	21.2202	0.93	0.084	0	2	MFGE8	0	21.2202	0.93	0.084	0	2	MFGE8
2020-09-11	0	21.0216	0.688	0.188	0	2	2020-09-11	0	21.0216	0.688	0.188	0	2	2020-09-11
RBMS1	0	20.7236	0.813	0.228	0	2	RBMS1	0	20.7236	0.813	0.228	0	2	RBMS1
LTBP4	0	20.6868	0.804	0.121	0	2	LTBP4	0	20.6868	0.804	0.121	0	2	LTBP4
MRC2	0	20.6212	0.753	0.052	0	2	MRC2	0	20.6212	0.753	0.052	0	2	MRC2
WNT2B	0	20.6131	0.539	0.078	0	2	WNT2B	0	20.6131	0.539	0.078	0	2	WNT2B
SFRP4	0	20.3926	0.503	0.08	0	2	SFRP4	0	20.3926	0.503	0.08	0	2	SFRP4
GPX8	0	20.3301	0.814	0.078	0	2	GPX8	0	20.3301	0.814	0.078	0	2	GPX8
LTBP2	0	20.1659	0.589	0.068	0	2	LTBP2	0	20.1659	0.589	0.068	0	2	LTBP2
PLAC9	0	20.1097	0.736	0.053	0	2	PLAC9	0	20.1097	0.736	0.053	0	2	PLAC9
TMEM119	0	19.9777	0.618	0.033	0	2	TMEM119	0	19.9777	0.618	0.033	0	2	TMEM119
SMTN	0	19.7842	0.573	0.13	0	2	SMTN	0	19.7842	0.573	0.13	0	2	SMTN
TRIL	0	19.7116	0.541	0.029	0	2	TRIL	0	19.7116	0.541	0.029	0	2	TRIL
DSTN	0	19.6497	0.758	0.289	0	2	DSTN	0	19.6497	0.758	0.289	0	2	DSTN
OAF	0	19.5666	0.643	0.148	0	2	OAF	0	19.5666	0.643	0.148	0	2	OAF
LY6E	0	19.5342	0.723	0.337	0	2	LY6E	0	19.5342	0.723	0.337	0	2	LY6E
CFD	0	19.4991	0.54	0.103	0	2	CFD	0	19.4991	0.54	0.103	0	2	CFD
MXRA8	0	19.3972	0.9	0.055	0	2	MXRA8	0	19.3972	0.9	0.055	0	2	MXRA8
AEBP1	0	19.3116	0.924	0.064	0	2	AEBP1	0	19.3116	0.924	0.064	0	2	AEBP1
DDR2	0	19.1908	0.819	0.051	0	2	DDR2	0	19.1908	0.819	0.051	0	2	DDR2
ISLR	0	19.1464	0.727	0.048	0	2	ISLR	0	19.1464	0.727	0.048	0	2	ISLR
RAB31	0	19.0328	0.524	0.167	0	2	RAB31	0	19.0328	0.524	0.167	0	2	RAB31
ITGA11	0	18.9949	0.515	0.046	0	2	ITGA11	0	18.9949	0.515	0.046	0	2	ITGA11
MFAP2	0	18.7951	0.672	0.078	0	2	MFAP2	0	18.7951	0.672	0.078	0	2	MFAP2
FOXF1	0	18.6995	0.752	0.045	0	2	FOXF1	0	18.6995	0.752	0.045	0	2	FOXF1
MSRB3	0	18.5603	0.74	0.07	0	2	MSRB3	0	18.5603	0.74	0.07	0	2	MSRB3
TWIST2	0	18.4895	0.708	0.044	0	2	TWIST2	0	18.4895	0.708	0.044	0	2	TWIST2
SERPINF1	0	18.3872	0.909	0.074	0	2	SERPINF1	0	18.3872	0.909	0.074	0	2	SERPINF1
LUM	0	18.2388	0.869	0.037	0	2	LUM	0	18.2388	0.869	0.037	0	2	LUM
MXRA5	0	18.1389	0.676	0.058	0	2	MXRA5	0	18.1389	0.676	0.058	0	2	MXRA5
LRRN4CL	0	17.98	0.542	0.044	0	2	LRRN4CL	0	17.98	0.542	0.044	0	2	LRRN4CL
MYLK	0	17.9379	0.637	0.052	0	2	MYLK	0	17.9379	0.637	0.052	0	2	MYLK
PTCH1	0	17.9215	0.528	0.052	0	2	PTCH1	0	17.9215	0.528	0.052	0	2	PTCH1
PCDH7	0	17.8288	0.628	0.041	0	2	PCDH7	0	17.8288	0.628	0.041	0	2	PCDH7
SGCA	0	17.7163	0.514	0.032	0	2	SGCA	0	17.7163	0.514	0.032	0	2	SGCA
HSPB8	0	17.7111	0.676	0.065	0	2	HSPB8	0	17.7111	0.676	0.065	0	2	HSPB8
FKBP10	0	17.692	0.886	0.09	0	2	FKBP10	0	17.692	0.886	0.09	0	2	FKBP10
AKR1B1	0	17.499	0.612	0.236	0	2	AKR1B1	0	17.499	0.612	0.236	0	2	AKR1B1
TGFB1I1	0	17.4937	0.854	0.088	0	2	TGFB1I1	0	17.4937	0.854	0.088	0	2	TGFB1I1
ZFP36	0	17.4875	0.674	0.325	0	2	ZFP36	0	17.4875	0.674	0.325	0	2	ZFP36
TPM1	0	17.4748	0.817	0.155	0	2	TPM1	0	17.4748	0.817	0.155	0	2	TPM1
PRR16	0	17.4245	0.518	0.041	0	2	PRR16	0	17.4245	0.518	0.041	0	2	PRR16
SSPN	0	17.2639	0.769	0.092	0	2	SSPN	0	17.2639	0.769	0.092	0	2	SSPN
SRPX	0	17.2009	0.665	0.064	0	2	SRPX	0	17.2009	0.665	0.064	0	2	SRPX
TPM2	0	17.1817	0.882	0.061	0	2	TPM2	0	17.1817	0.882	0.061	0	2	TPM2
CPQ	0	17.0771	0.81	0.141	0	2	CPQ	0	17.0771	0.81	0.141	0	2	CPQ
TMEM45A	0	17.0459	0.764	0.154	0	2	TMEM45A	0	17.0459	0.764	0.154	0	2	TMEM45A
COL6A1	0	17.0079	0.973	0.061	0	2	COL6A1	0	17.0079	0.973	0.061	0	2	COL6A1
NEGR1	0	16.9634	0.577	0.035	0	2	NEGR1	0	16.9634	0.577	0.035	0	2	NEGR1
PLOD2	0	16.8863	0.645	0.088	0	2	PLOD2	0	16.8863	0.645	0.088	0	2	PLOD2
QSOX1	0	16.8396	0.625	0.197	0	2	QSOX1	0	16.8396	0.625	0.197	0	2	QSOX1
LOX	0	16.6902	0.67	0.085	0	2	LOX	0	16.6902	0.67	0.085	0	2	LOX
GLT8D2	0	16.6645	0.814	0.069	0	2	GLT8D2	0	16.6645	0.814	0.069	0	2	GLT8D2
PRRX1	0	16.602	0.7	0.066	0	2	PRRX1	0	16.602	0.7	0.066	0	2	PRRX1
CLMP	0	16.5745	0.698	0.042	0	2	CLMP	0	16.5745	0.698	0.042	0	2	CLMP
ARID5B	0	16.5143	0.652	0.329	0	2	ARID5B	0	16.5143	0.652	0.329	0	2	ARID5B
SGIP1	0	16.4433	0.559	0.051	0	2	SGIP1	0	16.4433	0.559	0.051	0	2	SGIP1
PDLIM7	0	16.3914	0.732	0.17	0	2	PDLIM7	0	16.3914	0.732	0.17	0	2	PDLIM7
THBS2	0	16.2535	0.665	0.078	0	2	THBS2	0	16.2535	0.665	0.078	0	2	THBS2
BGN	0	16.2211	0.766	0.083	0	2	BGN	0	16.2211	0.766	0.083	0	2	BGN
SLIT2	0	16.0266	0.571	0.04	0	2	SLIT2	0	16.0266	0.571	0.04	0	2	SLIT2
ZFP36L1	0	15.9833	0.816	0.312	0	2	ZFP36L1	0	15.9833	0.816	0.312	0	2	ZFP36L1
FOXF2	0	15.9466	0.544	0.026	0	2	FOXF2	0	15.9466	0.544	0.026	0	2	FOXF2
PCOLCE	0	15.9126	0.911	0.049	0	2	PCOLCE	0	15.9126	0.911	0.049	0	2	PCOLCE
JUNB	0	15.9046	0.825	0.281	0	2	JUNB	0	15.9046	0.825	0.281	0	2	JUNB
DCN	0	15.8281	0.854	0.04	0	2	DCN	0	15.8281	0.854	0.04	0	2	DCN
IRF1	0	15.7858	0.671	0.281	0	2	IRF1	0	15.7858	0.671	0.281	0	2	IRF1
KANK2	0	15.7803	0.752	0.071	0	2	KANK2	0	15.7803	0.752	0.071	0	2	KANK2
TPST1	0	15.7682	0.7	0.081	0	2	TPST1	0	15.7682	0.7	0.081	0	2	TPST1
NR2F2-AS1	0	15.732	0.525	0.044	0	2	NR2F2-AS1	0	15.732	0.525	0.044	0	2	NR2F2-AS1
LRRC17	0	15.6912	0.515	0.035	0	2	LRRC17	0	15.6912	0.515	0.035	0	2	LRRC17
MYH10	0	15.6485	0.502	0.063	0	2	MYH10	0	15.6485	0.502	0.063	0	2	MYH10
PPIC	0	15.5681	0.862	0.149	0	2	PPIC	0	15.5681	0.862	0.149	0	2	PPIC
C1QTNF2	0	15.5117	0.611	0.032	0	2	C1QTNF2	0	15.5117	0.611	0.032	0	2	C1QTNF2
CSRP1	0	15.2854	0.627	0.208	0	2	CSRP1	0	15.2854	0.627	0.208	0	2	CSRP1
COL5A1	0	15.1777	0.767	0.048	0	2	COL5A1	0	15.1777	0.767	0.048	0	2	COL5A1
EDIL3	0	15.1397	0.606	0.033	0	2	EDIL3	0	15.1397	0.606	0.033	0	2	EDIL3
PBX1	0	15.1386	0.69	0.1	0	2	PBX1	0	15.1386	0.69	0.1	0	2	PBX1
NOVA1	0	15.0562	0.547	0.039	0	2	NOVA1	0	15.0562	0.547	0.039	0	2	NOVA1
PDLIM3	0	14.9759	0.705	0.08	0	2	PDLIM3	0	14.9759	0.705	0.08	0	2	PDLIM3
LPP	0	14.8306	0.666	0.211	0	2	LPP	0	14.8306	0.666	0.211	0	2	LPP
COL1A2	0	14.8262	0.964	0.047	0	2	COL1A2	0	14.8262	0.964	0.047	0	2	COL1A2
PRKAR2B	0	14.7633	0.549	0.061	0	2	PRKAR2B	0	14.7633	0.549	0.061	0	2	PRKAR2B
AOC3	0	14.6817	0.599	0.052	0	2	AOC3	0	14.6817	0.599	0.052	0	2	AOC3
C1R	0	14.6012	0.956	0.049	0	2	C1R	0	14.6012	0.956	0.049	0	2	C1R
SPON2	0	14.5542	0.868	0.095	0	2	SPON2	0	14.5542	0.868	0.095	0	2	SPON2
FHL1	0	14.4696	0.821	0.082	0	2	FHL1	0	14.4696	0.821	0.082	0	2	FHL1
HGF	0	14.4564	0.508	0.055	0	2	HGF	0	14.4564	0.508	0.055	0	2	HGF
RIN2	0	14.2904	0.55	0.129	0	2	RIN2	0	14.2904	0.55	0.129	0	2	RIN2
OLFML1	0	14.2054	0.675	0.029	0	2	OLFML1	0	14.2054	0.675	0.029	0	2	OLFML1
RUNX1T1	0	13.9703	0.649	0.051	0	2	RUNX1T1	0	13.9703	0.649	0.051	0	2	RUNX1T1
POSTN	0	13.7685	0.57	0.051	0	2	POSTN	0	13.7685	0.57	0.051	0	2	POSTN
STEAP1	0	13.7496	0.509	0.094	0	2	STEAP1	0	13.7496	0.509	0.094	0	2	STEAP1
GEM	0	13.7394	0.832	0.118	0	2	GEM	0	13.7394	0.832	0.118	0	2	GEM
COL1A1	0	13.5777	0.958	0.055	0	2	COL1A1	0	13.5777	0.958	0.055	0	2	COL1A1
RP11-14N7.2	0	13.4564	0.725	0.115	0	2	RP11-14N7.2	0	13.4564	0.725	0.115	0	2	RP11-14N7.2
DNM3OS	0	13.4444	0.533	0.054	0	2	DNM3OS	0	13.4444	0.533	0.054	0	2	DNM3OS
EHD2	0	13.3925	0.769	0.075	0	2	EHD2	0	13.3925	0.769	0.075	0	2	EHD2
AC013461.1	0	13.3733	0.52	0.153	0	2	AC013461.1	0	13.3733	0.52	0.153	0	2	AC013461.1
PDGFRB	0	13.369	0.745	0.031	0	2	PDGFRB	0	13.369	0.745	0.031	0	2	PDGFRB
CALU	0	13.177	0.802	0.201	0	2	CALU	0	13.177	0.802	0.201	0	2	CALU
COL6A3	0	13.1641	0.862	0.045	0	2	COL6A3	0	13.1641	0.862	0.045	0	2	COL6A3
EFEMP1	0	13.1566	0.75	0.049	0	2	EFEMP1	0	13.1566	0.75	0.049	0	2	EFEMP1
MEDAG	0	13.0604	0.562	0.091	0	2	MEDAG	0	13.0604	0.562	0.091	0	2	MEDAG
COL3A1	0	13.0097	0.942	0.049	0	2	COL3A1	0	13.0097	0.942	0.049	0	2	COL3A1
SH3PXD2A	0	12.9457	0.567	0.141	0	2	SH3PXD2A	0	12.9457	0.567	0.141	0	2	SH3PXD2A
COL6A2	0	12.7455	0.986	0.059	0	2	COL6A2	0	12.7455	0.986	0.059	0	2	COL6A2
ITGB1	0	12.7058	0.791	0.287	0	2	ITGB1	0	12.7058	0.791	0.287	0	2	ITGB1
MAB21L2	0	12.6778	0.6	0.028	0	2	MAB21L2	0	12.6778	0.6	0.028	0	2	MAB21L2
IL1R1	0	12.6538	0.639	0.106	0	2	IL1R1	0	12.6538	0.639	0.106	0	2	IL1R1
ENAH	0	12.6418	0.509	0.121	0	2	ENAH	0	12.6418	0.509	0.121	0	2	ENAH
BST2	0	12.6107	0.775	0.325	0	2	BST2	0	12.6107	0.775	0.325	0	2	BST2
CPED1	0	12.5743	0.501	0.066	0	2	CPED1	0	12.5743	0.501	0.066	0	2	CPED1
THY1	0	12.4861	0.883	0.059	0	2	THY1	0	12.4861	0.883	0.059	0	2	THY1
RERG	0	12.4675	0.628	0.037	0	2	RERG	0	12.4675	0.628	0.037	0	2	RERG
RARRES2	0	12.2356	0.935	0.058	0	2	RARRES2	0	12.2356	0.935	0.058	0	2	RARRES2
TMEM47	0	12.1911	0.686	0.066	0	2	TMEM47	0	12.1911	0.686	0.066	0	2	TMEM47
FOSB	0	12.1852	0.877	0.297	0	2	FOSB	0	12.1852	0.877	0.297	0	2	FOSB
COL18A1	0	12.0765	0.801	0.1	0	2	COL18A1	0	12.0765	0.801	0.1	0	2	COL18A1
CCDC80	0	12.0672	0.827	0.042	0	2	CCDC80	0	12.0672	0.827	0.042	0	2	CCDC80
ANGPT1	0	11.9955	0.541	0.027	0	2	ANGPT1	0	11.9955	0.541	0.027	0	2	ANGPT1
CYBRD1	0	11.9369	0.814	0.088	0	2	CYBRD1	0	11.9369	0.814	0.088	0	2	CYBRD1
CLEC11A	0	11.9	0.872	0.109	0	2	CLEC11A	0	11.9	0.872	0.109	0	2	CLEC11A
IL6ST	0	11.8127	0.766	0.201	0	2	IL6ST	0	11.8127	0.766	0.201	0	2	IL6ST
ECM2	0	11.7238	0.604	0.035	0	2	ECM2	0	11.7238	0.604	0.035	0	2	ECM2
MEG3	0	11.5306	0.865	0.04	0	2	MEG3	0	11.5306	0.865	0.04	0	2	MEG3
GFPT2	0	11.4786	0.594	0.064	0	2	GFPT2	0	11.4786	0.594	0.064	0	2	GFPT2
ZNF503	0	11.3845	0.597	0.143	0	2	ZNF503	0	11.3845	0.597	0.143	0	2	ZNF503
CALD1	0	11.37	0.985	0.078	0	2	CALD1	0	11.37	0.985	0.078	0	2	CALD1
CMTM3	0	11.2055	0.596	0.228	0	2	CMTM3	0	11.2055	0.596	0.228	0	2	CMTM3
COX7A1	0	11.0596	0.859	0.075	0	2	COX7A1	0	11.0596	0.859	0.075	0	2	COX7A1
SYNPO2	0	10.9207	0.552	0.044	0	2	SYNPO2	0	10.9207	0.552	0.044	0	2	SYNPO2
GSN	0	10.6819	0.728	0.166	0	2	GSN	0	10.6819	0.728	0.166	0	2	GSN
LOXL2	0	10.6399	0.557	0.065	0	2	LOXL2	0	10.6399	0.557	0.065	0	2	LOXL2
GUCY1B3	0	10.5967	0.55	0.046	0	2	GUCY1B3	0	10.5967	0.55	0.046	0	2	GUCY1B3
RND3	0	10.3847	0.685	0.161	0	2	RND3	0	10.3847	0.685	0.161	0	2	RND3
BHLHE22	0	10.3803	0.512	0.024	0	2	BHLHE22	0	10.3803	0.512	0.024	0	2	BHLHE22
NDN	0	10.3697	0.831	0.059	0	2	NDN	0	10.3697	0.831	0.059	0	2	NDN
SNAI2	0	10.3594	0.7	0.06	0	2	SNAI2	0	10.3594	0.7	0.06	0	2	SNAI2
NR4A1	0	10.3211	0.688	0.284	0	2	NR4A1	0	10.3211	0.688	0.284	0	2	NR4A1
CTHRC1	0	10.2368	0.557	0.11	0	2	CTHRC1	0	10.2368	0.557	0.11	0	2	CTHRC1
RBMS3	0	10.188	0.664	0.061	0	2	RBMS3	0	10.188	0.664	0.061	0	2	RBMS3
SGCD	0	10.0692	0.558	0.039	0	2	SGCD	0	10.0692	0.558	0.039	0	2	SGCD
PDLIM2	0	9.87616	0.782	0.204	0	2	PDLIM2	0	9.87616	0.782	0.204	0	2	PDLIM2
NFKBIZ	0	9.87195	0.763	0.273	0	2	NFKBIZ	0	9.87195	0.763	0.273	0	2	NFKBIZ
SCPEP1	0	9.80176	0.743	0.203	0	2	SCPEP1	0	9.80176	0.743	0.203	0	2	SCPEP1
PKIG	0	9.59231	0.677	0.18	0	2	PKIG	0	9.59231	0.677	0.18	0	2	PKIG
CTSF	0	9.5235	0.81	0.124	0	2	CTSF	0	9.5235	0.81	0.124	0	2	CTSF
EDNRB	0	9.40052	0.585	0.062	0	2	EDNRB	0	9.40052	0.585	0.062	0	2	EDNRB
FBLN2	0	9.31851	0.653	0.061	0	2	FBLN2	0	9.31851	0.653	0.061	0	2	FBLN2
EBF1	0	9.2826	0.541	0.091	0	2	EBF1	0	9.2826	0.541	0.091	0	2	EBF1
FRZB	0	9.2289	0.524	0.036	0	2	FRZB	0	9.2289	0.524	0.036	0	2	FRZB
HTRA3	0	9.20213	0.758	0.049	0	2	HTRA3	0	9.20213	0.758	0.049	0	2	HTRA3
PTGDS	0	9.19037	0.645	0.071	0	2	PTGDS	0	9.19037	0.645	0.071	0	2	PTGDS
COL12A1	0	9.19003	0.716	0.066	0	2	COL12A1	0	9.19003	0.716	0.066	0	2	COL12A1
CD99	0	9.10278	0.774	0.338	0	2	CD99	0	9.10278	0.774	0.338	0	2	CD99
C11orf96	0	9.09031	0.931	0.058	0	2	C11orf96	0	9.09031	0.931	0.058	0	2	C11orf96
SSC5D	0	9.0575	0.626	0.053	0	2	SSC5D	0	9.0575	0.626	0.053	0	2	SSC5D
SNHG23	0	8.88116	0.641	0.057	0	2	SNHG23	0	8.88116	0.641	0.057	0	2	SNHG23
AGTR1	0	8.64641	0.541	0.034	0	2	AGTR1	0	8.64641	0.541	0.034	0	2	AGTR1
PTGES	0	8.61599	0.567	0.081	0	2	PTGES	0	8.61599	0.567	0.081	0	2	PTGES
APOD	0	8.57566	0.622	0.061	0	2	APOD	0	8.57566	0.622	0.061	0	2	APOD
MMP14	0	8.54966	0.785	0.142	0	2	MMP14	0	8.54966	0.785	0.142	0	2	MMP14
TUBB6	0	8.51895	0.8	0.134	0	2	TUBB6	0	8.51895	0.8	0.134	0	2	TUBB6
MMP23B	0	8.51376	0.662	0.064	0	2	MMP23B	0	8.51376	0.662	0.064	0	2	MMP23B
CEBPD	0	8.49311	0.734	0.158	0	2	CEBPD	0	8.49311	0.734	0.158	0	2	CEBPD
MYL9	0	8.47674	0.924	0.081	0	2	MYL9	0	8.47674	0.924	0.081	0	2	MYL9
NID1	0	8.47116	0.727	0.063	0	2	NID1	0	8.47116	0.727	0.063	0	2	NID1
RCAN2	0	8.46595	0.601	0.071	0	2	RCAN2	0	8.46595	0.601	0.071	0	2	RCAN2
TNS1	0	8.40103	0.609	0.089	0	2	TNS1	0	8.40103	0.609	0.089	0	2	TNS1
MMP2	0	8.29362	0.838	0.074	0	2	MMP2	0	8.29362	0.838	0.074	0	2	MMP2
GPX3	0	8.28979	0.605	0.102	0	2	GPX3	0	8.28979	0.605	0.102	0	2	GPX3
PTK7	0	8.16467	0.586	0.088	0	2	PTK7	0	8.16467	0.586	0.088	0	2	PTK7
HSD11B1	0	7.9643	0.572	0.073	0	2	HSD11B1	0	7.9643	0.572	0.073	0	2	HSD11B1
FERMT2	0	7.95405	0.785	0.085	0	2	FERMT2	0	7.95405	0.785	0.085	0	2	FERMT2
NFIA	0	7.7537	0.623	0.14	0	2	NFIA	0	7.7537	0.623	0.14	0	2	NFIA
COPZ2	0	7.74162	0.713	0.085	0	2	COPZ2	0	7.74162	0.713	0.085	0	2	COPZ2
FAM20C	0	7.68469	0.557	0.081	0	2	FAM20C	0	7.68469	0.557	0.081	0	2	FAM20C
SPARC	0	7.63267	0.938	0.086	0	2	SPARC	0	7.63267	0.938	0.086	0	2	SPARC
GRK5	0	7.5606	0.518	0.121	0	2	GRK5	0	7.5606	0.518	0.121	0	2	GRK5
BMP4	0	7.49855	0.523	0.092	0	2	BMP4	0	7.49855	0.523	0.092	0	2	BMP4
TAGLN	0	7.45876	0.62	0.054	0	2	TAGLN	0	7.45876	0.62	0.054	0	2	TAGLN
GSTM3	0	7.40731	0.796	0.111	0	2	GSTM3	0	7.40731	0.796	0.111	0	2	GSTM3
DPT	0	7.38766	0.562	0.044	0	2	DPT	0	7.38766	0.562	0.044	0	2	DPT
SLC25A44	0	7.38244	0.538	0.149	0	2	SLC25A44	0	7.38244	0.538	0.149	0	2	SLC25A44
FMOD	0	7.24524	0.723	0.048	0	2	FMOD	0	7.24524	0.723	0.048	0	2	FMOD
F10	0	7.17158	0.536	0.053	0	2	F10	0	7.17158	0.536	0.053	0	2	F10
OLFML3	0	7.16418	0.786	0.068	0	2	OLFML3	0	7.16418	0.786	0.068	0	2	OLFML3
HCFC1R1	0	7.1552	0.773	0.213	0	2	HCFC1R1	0	7.1552	0.773	0.213	0	2	HCFC1R1
BTG2	0	7.07809	0.535	0.332	0	2	BTG2	0	7.07809	0.535	0.332	0	2	BTG2
VSTM4	0	6.859	0.627	0.062	0	2	VSTM4	0	6.859	0.627	0.062	0	2	VSTM4
GREM1	0	6.85108	0.556	0.053	0	2	GREM1	0	6.85108	0.556	0.053	0	2	GREM1
ITIH5	0	6.52441	0.574	0.058	0	2	ITIH5	0	6.52441	0.574	0.058	0	2	ITIH5
CYGB	0	6.36675	0.813	0.031	0	2	CYGB	0	6.36675	0.813	0.031	0	2	CYGB
PLAT	0	6.30362	0.77	0.081	0	2	PLAT	0	6.30362	0.77	0.081	0	2	PLAT
LHFP	0	6.19694	0.847	0.071	0	2	LHFP	0	6.19694	0.847	0.071	0	2	LHFP
ACTA2	0	6.16324	0.669	0.06	0	2	ACTA2	0	6.16324	0.669	0.06	0	2	ACTA2
RAB34	0	6.0927	0.884	0.146	0	2	RAB34	0	6.0927	0.884	0.146	0	2	RAB34
C9orf3	0	6.09145	0.683	0.126	0	2	C9orf3	0	6.09145	0.683	0.126	0	2	C9orf3
LGALS1	0	5.96772	0.978	0.213	0	2	LGALS1	0	5.96772	0.978	0.213	0	2	LGALS1
IGFBP6	0	5.86913	0.836	0.077	0	2	IGFBP6	0	5.86913	0.836	0.077	0	2	IGFBP6
PTN	0	5.83049	0.753	0.03	0	2	PTN	0	5.83049	0.753	0.03	0	2	PTN
NR2F1-AS1	0	5.74412	0.586	0.031	0	2	NR2F1-AS1	0	5.74412	0.586	0.031	0	2	NR2F1-AS1
LRP1	0	5.65002	0.803	0.125	0	2	LRP1	0	5.65002	0.803	0.125	0	2	LRP1
VCL	0	5.6316	0.535	0.166	0	2	VCL	0	5.6316	0.535	0.166	0	2	VCL
MOXD1	0	5.57016	0.561	0.079	0	2	MOXD1	0	5.57016	0.561	0.079	0	2	MOXD1
ASPN	0	5.56719	0.566	0.063	0	2	ASPN	0	5.56719	0.566	0.063	0	2	ASPN
FILIP1L	0	5.54022	0.794	0.082	0	2	FILIP1L	0	5.54022	0.794	0.082	0	2	FILIP1L
S100A13	0	5.47192	0.851	0.191	0	2	S100A13	0	5.47192	0.851	0.191	0	2	S100A13
MRGPRF	0	5.41583	0.691	0.037	0	2	MRGPRF	0	5.41583	0.691	0.037	0	2	MRGPRF
FRMD6	0	5.41436	0.614	0.07	0	2	FRMD6	0	5.41436	0.614	0.07	0	2	FRMD6
CXCL12	0	5.36613	0.724	0.075	0	2	CXCL12	0	5.36613	0.724	0.075	0	2	CXCL12
PPP1R14A	0	5.35065	0.516	0.053	0	2	PPP1R14A	0	5.35065	0.516	0.053	0	2	PPP1R14A
TNC	0	5.33605	0.502	0.048	0	2	TNC	0	5.33605	0.502	0.048	0	2	TNC
IER2	0	5.27966	0.828	0.302	0	2	IER2	0	5.27966	0.828	0.302	0	2	IER2
SOCS3	0	5.27741	0.746	0.22	0	2	SOCS3	0	5.27741	0.746	0.22	0	2	SOCS3
PRELP	0	5.22002	0.536	0.058	0	2	PRELP	0	5.22002	0.536	0.058	0	2	PRELP
GADD45B	0	5.15192	0.755	0.266	0	2	GADD45B	0	5.15192	0.755	0.266	0	2	GADD45B
OAZ2	0	5.14604	0.621	0.27	0	2	OAZ2	0	5.14604	0.621	0.27	0	2	OAZ2
PLPP3	0	5.1272	0.743	0.091	0	2	PLPP3	0	5.1272	0.743	0.091	0	2	PLPP3
CTSK	0	5.06648	0.835	0.067	0	2	CTSK	0	5.06648	0.835	0.067	0	2	CTSK
IGFBP5	0	5.05701	0.781	0.052	0	2	IGFBP5	0	5.05701	0.781	0.052	0	2	IGFBP5
RSPO3	0	5.0036	0.577	0.055	0	2	RSPO3	0	5.0036	0.577	0.055	0	2	RSPO3
DBN1	0	4.99158	0.653	0.112	0	2	DBN1	0	4.99158	0.653	0.112	0	2	DBN1
CRABP2	0	4.98973	0.61	0.085	0	2	CRABP2	0	4.98973	0.61	0.085	0	2	CRABP2
MAP1A	0	4.9341	0.696	0.06	0	2	MAP1A	0	4.9341	0.696	0.06	0	2	MAP1A
TPPP3	0	4.91179	0.503	0.107	0	2	TPPP3	0	4.91179	0.503	0.107	0	2	TPPP3
SVIL	0	4.82107	0.537	0.133	0	2	SVIL	0	4.82107	0.537	0.133	0	2	SVIL
FSTL1	0	4.75352	0.901	0.085	0	2	FSTL1	0	4.75352	0.901	0.085	0	2	FSTL1
APCDD1	0	4.73259	0.564	0.07	0	2	APCDD1	0	4.73259	0.564	0.07	0	2	APCDD1
PLXDC1	0	4.73223	0.531	0.064	0	2	PLXDC1	0	4.73223	0.531	0.064	0	2	PLXDC1
CYP7B1	0	4.7003	0.544	0.053	0	2	CYP7B1	0	4.7003	0.544	0.053	0	2	CYP7B1
RBPMS	0	4.69559	0.736	0.113	0	2	RBPMS	0	4.69559	0.736	0.113	0	2	RBPMS
CRISPLD2	0	4.66532	0.862	0.051	0	2	CRISPLD2	0	4.66532	0.862	0.051	0	2	CRISPLD2
PDE1A	0	4.63298	0.584	0.036	0	2	PDE1A	0	4.63298	0.584	0.036	0	2	PDE1A
PIM1	0	4.62571	0.556	0.279	0	2	PIM1	0	4.62571	0.556	0.279	0	2	PIM1
TPM4	0	4.54068	0.655	0.359	0	2	TPM4	0	4.54068	0.655	0.359	0	2	TPM4
GAS1	0	4.52624	0.538	0.087	0	2	GAS1	0	4.52624	0.538	0.087	0	2	GAS1
HTRA1	0	4.50181	0.843	0.111	0	2	HTRA1	0	4.50181	0.843	0.111	0	2	HTRA1
TUBA1B	0	4.49671	0.706	0.351	0	2	TUBA1B	0	4.49671	0.706	0.351	0	2	TUBA1B
GAS7	0	4.45701	0.559	0.099	0	2	GAS7	0	4.45701	0.559	0.099	0	2	GAS7
ID4	0	4.45089	0.783	0.043	0	2	ID4	0	4.45089	0.783	0.043	0	2	ID4
SULF1	0	4.44944	0.668	0.08	0	2	SULF1	0	4.44944	0.668	0.08	0	2	SULF1
EID1	0	4.44388	0.93	0.329	0	2	EID1	0	4.44388	0.93	0.329	0	2	EID1
FN1	0	4.42359	0.85	0.087	0	2	FN1	0	4.42359	0.85	0.087	0	2	FN1
PDGFRA	0	4.42244	0.687	0.034	0	2	PDGFRA	0	4.42244	0.687	0.034	0	2	PDGFRA
PHLDB1	0	4.41841	0.596	0.131	0	2	PHLDB1	0	4.41841	0.596	0.131	0	2	PHLDB1
NFIC	0	4.39177	0.876	0.17	0	2	NFIC	0	4.39177	0.876	0.17	0	2	NFIC
HSPB2	0	4.38776	0.683	0.038	0	2	HSPB2	0	4.38776	0.683	0.038	0	2	HSPB2
PRSS23	0	4.34696	0.671	0.124	0	2	PRSS23	0	4.34696	0.671	0.124	0	2	PRSS23
JUN	0	4.30826	0.746	0.294	0	2	JUN	0	4.30826	0.746	0.294	0	2	JUN
MTRNR2L8	0	4.30602	0.697	0.202	0	2	MTRNR2L8	0	4.30602	0.697	0.202	0	2	MTRNR2L8
SERPINE2	0	4.30114	0.662	0.114	0	2	SERPINE2	0	4.30114	0.662	0.114	0	2	SERPINE2
PLAU	0	4.29929	0.531	0.138	0	2	PLAU	0	4.29929	0.531	0.138	0	2	PLAU
TMEM98	0	4.28678	0.705	0.127	0	2	TMEM98	0	4.28678	0.705	0.127	0	2	TMEM98
CD302	0	4.21142	0.557	0.109	0	2	CD302	0	4.21142	0.557	0.109	0	2	CD302
IRF2BPL	0	4.18328	0.533	0.155	0	2	IRF2BPL	0	4.18328	0.533	0.155	0	2	IRF2BPL
CCL2	0	4.18296	0.739	0.129	0	2	CCL2	0	4.18296	0.739	0.129	0	2	CCL2
COL4A1	0	4.1801	0.61	0.073	0	2	COL4A1	0	4.1801	0.61	0.073	0	2	COL4A1
ANGPTL2	0	4.17643	0.759	0.085	0	2	ANGPTL2	0	4.17643	0.759	0.085	0	2	ANGPTL2
EGR1	0	4.16876	0.923	0.183	0	2	EGR1	0	4.16876	0.923	0.183	0	2	EGR1
IGFBP4	0	4.16517	0.897	0.129	0	2	IGFBP4	0	4.16517	0.897	0.129	0	2	IGFBP4
NNMT	0	4.16048	0.937	0.085	0	2	NNMT	0	4.16048	0.937	0.085	0	2	NNMT
VCAN	0	4.15265	0.794	0.075	0	2	VCAN	0	4.15265	0.794	0.075	0	2	VCAN
CSRP2	0	4.12728	0.567	0.076	0	2	CSRP2	0	4.12728	0.567	0.076	0	2	CSRP2
LMCD1	0	4.10751	0.531	0.115	0	2	LMCD1	0	4.10751	0.531	0.115	0	2	LMCD1
NTN4	0	4.03139	0.502	0.084	0	2	NTN4	0	4.03139	0.502	0.084	0	2	NTN4
MGP	0	4.01161	0.728	0.089	0	2	MGP	0	4.01161	0.728	0.089	0	2	MGP
IFITM3	0	3.97755	0.961	0.235	0	2	IFITM3	0	3.97755	0.961	0.235	0	2	IFITM3
CCNB1	0	3.97062	0.615	0.398	0	2	CCNB1	0	3.97062	0.615	0.398	0	2	CCNB1
ELN	0	3.9459	0.644	0.061	0	2	ELN	0	3.9459	0.644	0.061	0	2	ELN
A4GALT	0	3.93723	0.7	0.085	0	2	A4GALT	0	3.93723	0.7	0.085	0	2	A4GALT
HAS2	0	3.92411	0.636	0.044	0	2	HAS2	0	3.92411	0.636	0.044	0	2	HAS2
CD151	0	3.92252	0.755	0.276	0	2	CD151	0	3.92252	0.755	0.276	0	2	CD151
SMIM3	0	3.91859	0.511	0.173	0	2	SMIM3	0	3.91859	0.511	0.173	0	2	SMIM3
COL8A1	0	3.90239	0.579	0.082	0	2	COL8A1	0	3.90239	0.579	0.082	0	2	COL8A1
NR2F1	0	3.89632	0.555	0.046	0	2	NR2F1	0	3.89632	0.555	0.046	0	2	NR2F1
MT2A	0	3.86893	0.557	0.199	0	2	MT2A	0	3.86893	0.557	0.199	0	2	MT2A
LAPTM4A	0	3.86757	0.913	0.315	0	2	LAPTM4A	0	3.86757	0.913	0.315	0	2	LAPTM4A
GAS6	0	3.83266	0.62	0.186	0	2	GAS6	0	3.83266	0.62	0.186	0	2	GAS6
INAFM1	0	3.79128	0.619	0.115	0	2	INAFM1	0	3.79128	0.619	0.115	0	2	INAFM1
TWIST1	0	3.79107	0.595	0.06	0	2	TWIST1	0	3.79107	0.595	0.06	0	2	TWIST1
PDPN	0	3.77238	0.656	0.094	0	2	PDPN	0	3.77238	0.656	0.094	0	2	PDPN
CES1	0	3.77024	0.57	0.046	0	2	CES1	0	3.77024	0.57	0.046	0	2	CES1
PRC1	0	3.74888	0.538	0.319	0	2	PRC1	0	3.74888	0.538	0.319	0	2	PRC1
FST	0	3.74371	0.578	0.045	0	2	FST	0	3.74371	0.578	0.045	0	2	FST
HIC1	0	3.40787	0.579	0.112	0	2	HIC1	0	3.40787	0.579	0.112	0	2	HIC1
SDC2	0	3.38271	0.878	0.084	0	2	SDC2	0	3.38271	0.878	0.084	0	2	SDC2
RAB13	0	3.37729	0.772	0.211	0	2	RAB13	0	3.37729	0.772	0.211	0	2	RAB13
FIBIN	0	3.35647	0.559	0.048	0	2	FIBIN	0	3.35647	0.559	0.048	0	2	FIBIN
P3H1	0	3.34647	0.576	0.132	0	2	P3H1	0	3.34647	0.576	0.132	0	2	P3H1
CTGF	0	3.33102	0.712	0.106	0	2	CTGF	0	3.33102	0.712	0.106	0	2	CTGF
ABI3BP	0	3.3097	0.55	0.048	0	2	ABI3BP	0	3.3097	0.55	0.048	0	2	ABI3BP
FBLN5	0	3.28903	0.674	0.067	0	2	FBLN5	0	3.28903	0.674	0.067	0	2	FBLN5
UBE2S	0	3.27359	0.53	0.297	0	2	UBE2S	0	3.27359	0.53	0.297	0	2	UBE2S
SSBP2	0	3.26946	0.62	0.137	0	2	SSBP2	0	3.26946	0.62	0.137	0	2	SSBP2
GUCY1A3	0	3.17626	0.601	0.059	0	2	GUCY1A3	0	3.17626	0.601	0.059	0	2	GUCY1A3
MITF	0	3.1334	0.57	0.082	0	2	MITF	0	3.1334	0.57	0.082	0	2	MITF
ID3	0	3.12983	0.763	0.19	0	2	ID3	0	3.12983	0.763	0.19	0	2	ID3
KLF9	0	3.12281	0.78	0.138	0	2	KLF9	0	3.12281	0.78	0.138	0	2	KLF9
DDAH2	0	3.04215	0.681	0.275	0	2	DDAH2	0	3.04215	0.681	0.275	0	2	DDAH2
TCEAL7	0	3.00572	0.722	0.032	0	2	TCEAL7	0	3.00572	0.722	0.032	0	2	TCEAL7
INMT	0	2.97996	0.522	0.049	0	2	INMT	0	2.97996	0.522	0.049	0	2	INMT
RGMA	0	2.93483	0.529	0.05	0	2	RGMA	0	2.93483	0.529	0.05	0	2	RGMA
PHLDA1	0	2.92915	0.571	0.261	0	2	PHLDA1	0	2.92915	0.571	0.261	0	2	PHLDA1
TIMP3	0	2.91004	0.841	0.103	0	2	TIMP3	0	2.91004	0.841	0.103	0	2	TIMP3
LAMB1	0	2.85779	0.662	0.098	0	2	LAMB1	0	2.85779	0.662	0.098	0	2	LAMB1
TMEM176B	0	2.82728	0.782	0.2	0	2	TMEM176B	0	2.82728	0.782	0.2	0	2	TMEM176B
FGF2	0	2.73489	0.516	0.052	0	2	FGF2	0	2.73489	0.516	0.052	0	2	FGF2
IER3	0	2.72329	0.701	0.24	0	2	IER3	0	2.72329	0.701	0.24	0	2	IER3
SOD3	0	2.70391	0.844	0.085	0	2	SOD3	0	2.70391	0.844	0.085	0	2	SOD3
ADM	0	2.60549	0.568	0.165	0	2	ADM	0	2.60549	0.568	0.165	0	2	ADM
LAMA4	0	2.59575	0.839	0.077	0	2	LAMA4	0	2.59575	0.839	0.077	0	2	LAMA4
MAP1B	0	2.57819	0.618	0.067	0	2	MAP1B	0	2.57819	0.618	0.067	0	2	MAP1B
CYR61	0	2.56909	0.841	0.091	0	2	CYR61	0	2.56909	0.841	0.091	0	2	CYR61
CH25H	0	2.54062	0.584	0.074	0	2	CH25H	0	2.54062	0.584	0.074	0	2	CH25H
NKX2-3	0	2.53806	0.585	0.05	0	2	NKX2-3	0	2.53806	0.585	0.05	0	2	NKX2-3
KCNS3	0	2.47783	0.521	0.059	0	2	KCNS3	0	2.47783	0.521	0.059	0	2	KCNS3
ZBTB20	0	2.4761	0.542	0.199	0	2	ZBTB20	0	2.4761	0.542	0.199	0	2	ZBTB20
SMPDL3A	0	2.43576	0.58	0.124	0	2	SMPDL3A	0	2.43576	0.58	0.124	0	2	SMPDL3A
RASL12	0	2.43323	0.593	0.027	0	2	RASL12	0	2.43323	0.593	0.027	0	2	RASL12
TSC22D1	0	2.40498	0.618	0.221	0	2	TSC22D1	0	2.40498	0.618	0.221	0	2	TSC22D1
ANKRD35	0	2.39063	0.591	0.074	0	2	ANKRD35	0	2.39063	0.591	0.074	0	2	ANKRD35
RRAD	0	2.36181	0.673	0.11	0	2	RRAD	0	2.36181	0.673	0.11	0	2	RRAD
IGFBP7	0	2.35062	0.98	0.082	0	2	IGFBP7	0	2.35062	0.98	0.082	0	2	IGFBP7
SERPING1	0	2.29429	0.954	0.12	0	2	SERPING1	0	2.29429	0.954	0.12	0	2	SERPING1
P4HA2	0	2.28645	0.63	0.128	0	2	P4HA2	0	2.28645	0.63	0.128	0	2	P4HA2
EMP1	0	2.26592	0.665	0.186	0	2	EMP1	0	2.26592	0.665	0.186	0	2	EMP1
A2M	0	2.25008	0.732	0.121	0	2	A2M	0	2.25008	0.732	0.121	0	2	A2M
PLXDC2	0	2.21375	0.573	0.136	0	2	PLXDC2	0	2.21375	0.573	0.136	0	2	PLXDC2
C8orf4	0	2.20336	0.521	0.123	0	2	C8orf4	0	2.20336	0.521	0.123	0	2	C8orf4
ADAMTS4	0	2.20157	0.642	0.065	0	2	ADAMTS4	0	2.20157	0.642	0.065	0	2	ADAMTS4
ZMAT3	0	2.13769	0.526	0.153	0	2	ZMAT3	0	2.13769	0.526	0.153	0	2	ZMAT3
PTHLH	0	2.07111	0.519	0.083	0	2	PTHLH	0	2.07111	0.519	0.083	0	2	PTHLH
ARC	0	2.06331	0.57	0.089	0	2	ARC	0	2.06331	0.57	0.089	0	2	ARC
ECM1	0	2.0067	0.811	0.085	0	2	ECM1	0	2.0067	0.811	0.085	0	2	ECM1
C2	0	1.99217	0.631	0.128	0	2	C2	0	1.99217	0.631	0.128	0	2	C2
EPHX1	0	1.9721	0.706	0.123	0	2	EPHX1	0	1.9721	0.706	0.123	0	2	EPHX1
PTMS	0	1.95256	0.838	0.273	0	2	PTMS	0	1.95256	0.838	0.273	0	2	PTMS
RGS16	0	1.86664	0.567	0.164	0	2	RGS16	0	1.86664	0.567	0.164	0	2	RGS16
PHACTR2	0	1.83501	0.504	0.208	0	2	PHACTR2	0	1.83501	0.504	0.208	0	2	PHACTR2
NGFRAP1	0	1.82339	0.944	0.185	0	2	NGFRAP1	0	1.82339	0.944	0.185	0	2	NGFRAP1
ARL4D	0	1.77928	0.581	0.111	0	2	ARL4D	0	1.77928	0.581	0.111	0	2	ARL4D
FAP	0	1.76048	0.572	0.082	0	2	FAP	0	1.76048	0.572	0.082	0	2	FAP
VCAM1	0	1.74338	0.631	0.079	0	2	VCAM1	0	1.74338	0.631	0.079	0	2	VCAM1
RUNX1	0	1.69307	0.595	0.191	0	2	RUNX1	0	1.69307	0.595	0.191	0	2	RUNX1
FLRT2	0	1.68618	0.505	0.059	0	2	FLRT2	0	1.68618	0.505	0.059	0	2	FLRT2
DLL1	0	1.67877	0.637	0.078	0	2	DLL1	0	1.67877	0.637	0.078	0	2	DLL1
TNFAIP2	0	1.64788	0.579	0.183	0	2	TNFAIP2	0	1.64788	0.579	0.183	0	2	TNFAIP2
EMP2	0	1.63644	0.654	0.199	0	2	EMP2	0	1.63644	0.654	0.199	0	2	EMP2
SPON1	0	1.63037	0.601	0.101	0	2	SPON1	0	1.63037	0.601	0.101	0	2	SPON1
ADAMTS1	0	1.59778	0.715	0.068	0	2	ADAMTS1	0	1.59778	0.715	0.068	0	2	ADAMTS1
COL4A2	0	1.59149	0.68	0.077	0	2	COL4A2	0	1.59149	0.68	0.077	0	2	COL4A2
IGFBP3	0	1.58617	0.571	0.092	0	2	IGFBP3	0	1.58617	0.571	0.092	0	2	IGFBP3
NID2	0	1.55766	0.514	0.052	0	2	NID2	0	1.55766	0.514	0.052	0	2	NID2
C1orf21	0	1.53388	0.597	0.175	0	2	C1orf21	0	1.53388	0.597	0.175	0	2	C1orf21
SCARA3	0	1.51794	0.529	0.037	0	2	SCARA3	0	1.51794	0.529	0.037	0	2	SCARA3
HOXB-AS1	0	1.49932	0.531	0.095	0	2	HOXB-AS1	0	1.49932	0.531	0.095	0	2	HOXB-AS1
FOS	0	1.45832	0.875	0.276	0	2	FOS	0	1.45832	0.875	0.276	0	2	FOS
CPE	0	1.44837	0.506	0.085	0	2	CPE	0	1.44837	0.506	0.085	0	2	CPE
ACKR3	0	1.39951	0.619	0.072	0	2	ACKR3	0	1.39951	0.619	0.072	0	2	ACKR3
PRKCDBP	0	1.3992	0.94	0.106	0	2	PRKCDBP	0	1.3992	0.94	0.106	0	2	PRKCDBP
TNFAIP6	0	1.39025	0.658	0.094	0	2	TNFAIP6	0	1.39025	0.658	0.094	0	2	TNFAIP6
CDKN1A	0	1.34958	0.584	0.299	0	2	CDKN1A	0	1.34958	0.584	0.299	0	2	CDKN1A
MT1E	0	1.32533	0.546	0.145	0	2	MT1E	0	1.32533	0.546	0.145	0	2	MT1E
PLTP	0	1.32084	0.741	0.124	0	2	PLTP	0	1.32084	0.741	0.124	0	2	PLTP
PDLIM4	0	1.29939	0.697	0.117	0	2	PDLIM4	0	1.29939	0.697	0.117	0	2	PDLIM4
THBS1	0	1.25183	0.732	0.136	0	2	THBS1	0	1.25183	0.732	0.136	0	2	THBS1
ST6GALNAC6	0	1.1842	0.666	0.151	0	2	ST6GALNAC6	0	1.1842	0.666	0.151	0	2	ST6GALNAC6
KCNQ1OT1	0	1.10435	0.805	0.187	0	2	KCNQ1OT1	0	1.10435	0.805	0.187	0	2	KCNQ1OT1
FILIP1	0	1.0798	0.531	0.057	0	2	FILIP1	0	1.0798	0.531	0.057	0	2	FILIP1
SERPINH1	0	1.06853	0.876	0.137	0	2	SERPINH1	0	1.06853	0.876	0.137	0	2	SERPINH1
IGLV3-1	0	27.5322	0.54	0.238	0	3	IGLV3-1	5.21507e-150	27.5322	0.54	0.238	3.12904e-146	3	IGLV3-1	B & Plasma cells
FKBP11	0	27.3793	0.877	0.246	0	3	FKBP11	0	27.3793	0.877	0.246	0	3	FKBP11
TNFRSF17	0	26.3115	0.747	0.221	0	3	TNFRSF17	0	26.3115	0.747	0.221	0	3	TNFRSF17
DERL3	0	23.998	0.865	0.226	0	3	DERL3	0	23.998	0.865	0.226	0	3	DERL3
HERPUD1	0	18.4484	0.779	0.287	0	3	HERPUD1	0	18.4484	0.779	0.287	0	3	HERPUD1
PIM2	0	17.9611	0.617	0.204	0	3	PIM2	0	17.9611	0.617	0.204	0	3	PIM2
SSR4	0	16.9089	0.971	0.261	0	3	SSR4	0	16.9089	0.971	0.261	0	3	SSR4
CCR10	0	16.5989	0.565	0.216	0	3	CCR10	3.68136e-235	16.5989	0.565	0.216	2.20881e-231	3	CCR10
SPINK2	0	14.3308	0.538	0.141	0	3	SPINK2	5.22708e-145	14.3308	0.538	0.141	3.13625e-141	3	SPINK2
XBP1	0	13.8939	0.61	0.299	0	3	XBP1	0	13.8939	0.61	0.299	0	3	XBP1
FCRL5	0	11.7015	0.666	0.186	0	3	FCRL5	0	11.7015	0.666	0.186	0	3	FCRL5
MZB1	0	10.6377	0.924	0.208	0	3	MZB1	0	10.6377	0.924	0.208	0	3	MZB1
JSRP1	0	10.3174	0.593	0.216	0	3	JSRP1	0	10.3174	0.593	0.216	0	3	JSRP1
ITGB7	0	10.1032	0.513	0.165	0	3	ITGB7	4.15179e-157	10.1032	0.513	0.165	2.49108e-153	3	ITGB7
ZBP1	0	9.71549	0.526	0.112	0	3	ZBP1	9.79432e-177	9.71549	0.526	0.112	5.87659e-173	3	ZBP1
EVI2B	0	8.44522	0.561	0.272	0	3	EVI2B	0	8.44522	0.561	0.272	0	3	EVI2B
CD38	0	6.3693	0.562	0.176	0	3	CD38	0	6.3693	0.562	0.176	0	3	CD38
PRDM1	0	5.81715	0.605	0.224	0	3	PRDM1	0	5.81715	0.605	0.224	0	3	PRDM1
RAB30	0	5.50056	0.687	0.196	0	3	RAB30	0	5.50056	0.687	0.196	0	3	RAB30
IGHA2	0	5.15132	0.676	0.24	0	3	IGHA2	0	5.15132	0.676	0.24	0	3	IGHA2
GNG7	0	4.99868	0.731	0.152	0	3	GNG7	0	4.99868	0.731	0.152	0	3	GNG7
JCHAIN	0	4.79086	0.906	0.218	0	3	JCHAIN	0	4.79086	0.906	0.218	0	3	JCHAIN
DNAJB9	0	4.71935	0.686	0.259	0	3	DNAJB9	0	4.71935	0.686	0.259	0	3	DNAJB9
C16orf54	0	4.63713	0.597	0.115	0	3	C16orf54	0	4.63713	0.597	0.115	0	3	C16orf54
AL928768.3	0	3.83821	0.656	0.19	0	3	AL928768.3	0	3.83821	0.656	0.19	0	3	AL928768.3
RP1-313I6.12	0	3.44202	0.547	0.169	0	3	RP1-313I6.12	0	3.44202	0.547	0.169	0	3	RP1-313I6.12
DUSP5	0	3.28205	0.75	0.194	0	3	DUSP5	0	3.28205	0.75	0.194	0	3	DUSP5
IGKC	0	2.8819	0.663	0.236	0	3	IGKC	0	2.8819	0.663	0.236	0	3	IGKC
MEI1	0	2.64023	0.614	0.155	0	3	MEI1	0	2.64023	0.614	0.155	0	3	MEI1
CD79A	0	2.45178	0.809	0.117	0	3	CD79A	0	2.45178	0.809	0.117	0	3	CD79A
IGHA1	0	2.37127	0.772	0.253	0	3	IGHA1	0	2.37127	0.772	0.253	0	3	IGHA1
THAP2	0	2.09856	0.522	0.191	0	3	THAP2	1.24078e-179	2.09856	0.522	0.191	7.44469e-176	3	THAP2
ITM2C	0	2.05377	0.63	0.295	0	3	ITM2C	0	2.05377	0.63	0.295	0	3	ITM2C
CD27	0	1.20464	0.725	0.203	0	3	CD27	0	1.20464	0.725	0.203	0	3	CD27
ANKRD28	0	1.2021	0.725	0.223	0	3	ANKRD28	0	1.2021	0.725	0.223	0	3	ANKRD28
PLA2G7	0	32.9237	0.622	0.024	0	4	PLA2G7	0	32.9237	0.622	0.024	0	4	PLA2G7	Myeloid cells
IGSF6	0	31.9266	0.677	0.019	0	4	IGSF6	0	31.9266	0.677	0.019	0	4	IGSF6
FCGR2A	0	31.2396	0.809	0.049	0	4	FCGR2A	0	31.2396	0.809	0.049	0	4	FCGR2A
FCGR1A	0	30.8254	0.55	0.014	0	4	FCGR1A	0	30.8254	0.55	0.014	0	4	FCGR1A
FPR1	0	29.9488	0.552	0.032	0	4	FPR1	0	29.9488	0.552	0.032	0	4	FPR1
LINC01272	0	29.7723	0.51	0.036	0	4	LINC01272	0	29.7723	0.51	0.036	0	4	LINC01272
C5AR1	0	29.3045	0.722	0.039	0	4	C5AR1	0	29.3045	0.722	0.039	0	4	C5AR1
OLR1	0	29.1697	0.644	0.035	0	4	OLR1	0	29.1697	0.644	0.035	0	4	OLR1
LILRB2	0	29.1376	0.567	0.03	0	4	LILRB2	0	29.1376	0.567	0.03	0	4	LILRB2
CD163	0	28.4997	0.564	0.032	0	4	CD163	0	28.4997	0.564	0.032	0	4	CD163
CTSB	0	28.487	0.87	0.107	0	4	CTSB	0	28.487	0.87	0.107	0	4	CTSB
MSR1	0	28.3492	0.516	0.029	0	4	MSR1	0	28.3492	0.516	0.029	0	4	MSR1
CTSS	0	28.2291	0.891	0.21	0	4	CTSS	0	28.2291	0.891	0.21	0	4	CTSS
CYBB	0	27.6922	0.744	0.052	0	4	CYBB	0	27.6922	0.744	0.052	0	4	CYBB
MS4A4A	0	27.6231	0.644	0.018	0	4	MS4A4A	0	27.6231	0.644	0.018	0	4	MS4A4A
LILRB4	0	27.5548	0.674	0.03	0	4	LILRB4	0	27.5548	0.674	0.03	0	4	LILRB4
PSAP	0	26.8593	0.902	0.222	0	4	PSAP	0	26.8593	0.902	0.222	0	4	PSAP
GM2A	0	26.683	0.552	0.107	0	4	GM2A	0	26.683	0.552	0.107	0	4	GM2A
SNX10	0	26.5629	0.626	0.105	0	4	SNX10	0	26.5629	0.626	0.105	0	4	SNX10
LIPA	0	26.5251	0.575	0.175	0	4	LIPA	0	26.5251	0.575	0.175	0	4	LIPA
MS4A7	0	26.4721	0.785	0.04	0	4	MS4A7	0	26.4721	0.785	0.04	0	4	MS4A7
MPEG1	0	26.2452	0.625	0.044	0	4	MPEG1	0	26.2452	0.625	0.044	0	4	MPEG1
FPR3	0	26.1456	0.614	0.036	0	4	FPR3	0	26.1456	0.614	0.036	0	4	FPR3
FAM26F	0	26.0537	0.695	0.047	0	4	FAM26F	0	26.0537	0.695	0.047	0	4	FAM26F
CREG1	0	25.5374	0.694	0.208	0	4	CREG1	0	25.5374	0.694	0.208	0	4	CREG1
PILRA	0	25.3111	0.608	0.034	0	4	PILRA	0	25.3111	0.608	0.034	0	4	PILRA
SLC11A1	0	24.6262	0.521	0.047	0	4	SLC11A1	0	24.6262	0.521	0.047	0	4	SLC11A1
CCRL2	0	24.6	0.673	0.07	0	4	CCRL2	0	24.6	0.673	0.07	0	4	CCRL2
NLRP3	0	24.2978	0.514	0.05	0	4	NLRP3	0	24.2978	0.514	0.05	0	4	NLRP3
ACSL1	0	23.9607	0.524	0.095	0	4	ACSL1	0	23.9607	0.524	0.095	0	4	ACSL1
SLC7A7	0	23.4769	0.637	0.089	0	4	SLC7A7	0	23.4769	0.637	0.089	0	4	SLC7A7
CTSZ	0	23.1142	0.798	0.184	0	4	CTSZ	0	23.1142	0.798	0.184	0	4	CTSZ
C1orf162	0	23.0084	0.724	0.077	0	4	C1orf162	0	23.0084	0.724	0.077	0	4	C1orf162
LGMN	0	22.6895	0.663	0.189	0	4	LGMN	0	22.6895	0.663	0.189	0	4	LGMN
PLEK	0	22.3703	0.835	0.068	0	4	PLEK	0	22.3703	0.835	0.068	0	4	PLEK
SLAMF7	0	22.1032	0.516	0.158	0	4	SLAMF7	0	22.1032	0.516	0.158	0	4	SLAMF7
C1QB	0	21.7047	0.601	0.033	0	4	C1QB	0	21.7047	0.601	0.033	0	4	C1QB
CD68	0	21.4484	0.872	0.086	0	4	CD68	0	21.4484	0.872	0.086	0	4	CD68
C1QC	0	21.3909	0.587	0.022	0	4	C1QC	0	21.3909	0.587	0.022	0	4	C1QC
DMXL2	0	21.2268	0.507	0.071	0	4	DMXL2	0	21.2268	0.507	0.071	0	4	DMXL2
TYROBP	0	20.8372	0.983	0.051	0	4	TYROBP	0	20.8372	0.983	0.051	0	4	TYROBP
LINC00936	0	20.4896	0.59	0.171	0	4	LINC00936	0	20.4896	0.59	0.171	0	4	LINC00936
C1QA	0	20.2835	0.62	0.036	0	4	C1QA	0	20.2835	0.62	0.036	0	4	C1QA
IL1B	0	19.9026	0.851	0.042	0	4	IL1B	0	19.9026	0.851	0.042	0	4	IL1B
PLD3	0	19.7179	0.581	0.25	0	4	PLD3	0	19.7179	0.581	0.25	0	4	PLD3
CLEC4A	0	19.4267	0.574	0.036	0	4	CLEC4A	0	19.4267	0.574	0.036	0	4	CLEC4A
SDS	0	19.2862	0.593	0.019	0	4	SDS	0	19.2862	0.593	0.019	0	4	SDS
FCGR2B	0	18.781	0.524	0.085	0	4	FCGR2B	0	18.781	0.524	0.085	0	4	FCGR2B
MRC1	0	18.6007	0.543	0.043	0	4	MRC1	0	18.6007	0.543	0.043	0	4	MRC1
ABCA1	0	18.553	0.625	0.132	0	4	ABCA1	0	18.553	0.625	0.132	0	4	ABCA1
SPI1	0	18.5137	0.828	0.054	0	4	SPI1	0	18.5137	0.828	0.054	0	4	SPI1
SLC16A10	0	18.337	0.62	0.039	0	4	SLC16A10	0	18.337	0.62	0.039	0	4	SLC16A10
CD300A	0	18.2379	0.589	0.061	0	4	CD300A	0	18.2379	0.589	0.061	0	4	CD300A
STXBP2	0	18.1979	0.542	0.2	0	4	STXBP2	0	18.1979	0.542	0.2	0	4	STXBP2
SLC31A2	0	17.9701	0.605	0.103	0	4	SLC31A2	0	17.9701	0.605	0.103	0	4	SLC31A2
TXN	0	17.7775	0.52	0.303	0	4	TXN	0	17.7775	0.52	0.303	0	4	TXN
KYNU	0	17.7336	0.695	0.062	0	4	KYNU	0	17.7336	0.695	0.062	0	4	KYNU
STAB1	0	17.6732	0.522	0.088	0	4	STAB1	0	17.6732	0.522	0.088	0	4	STAB1
ETV3	0	17.5618	0.537	0.143	0	4	ETV3	0	17.5618	0.537	0.143	0	4	ETV3
MS4A6A	0	17.5337	0.757	0.027	0	4	MS4A6A	0	17.5337	0.757	0.027	0	4	MS4A6A
CSF2RA	0	17.4345	0.55	0.03	0	4	CSF2RA	0	17.4345	0.55	0.03	0	4	CSF2RA
GRN	0	17.2222	0.87	0.254	0	4	GRN	0	17.2222	0.87	0.254	0	4	GRN
GPR84	0	17.0432	0.522	0.029	0	4	GPR84	0	17.0432	0.522	0.029	0	4	GPR84
LAIR1	0	16.9613	0.653	0.062	0	4	LAIR1	0	16.9613	0.653	0.062	0	4	LAIR1
TYMP	0	16.8346	0.914	0.211	0	4	TYMP	0	16.8346	0.914	0.211	0	4	TYMP
PPT1	0	16.7612	0.74	0.256	0	4	PPT1	0	16.7612	0.74	0.256	0	4	PPT1
CD86	0	16.6211	0.733	0.047	0	4	CD86	0	16.6211	0.733	0.047	0	4	CD86
FCER1G	0	16.2977	0.967	0.047	0	4	FCER1G	0	16.2977	0.967	0.047	0	4	FCER1G
IL1A	0	16.2041	0.541	0.039	0	4	IL1A	0	16.2041	0.541	0.039	0	4	IL1A
SGK1	0	16.1324	0.763	0.16	0	4	SGK1	0	16.1324	0.763	0.16	0	4	SGK1
KMO	0	16.028	0.502	0.048	0	4	KMO	0	16.028	0.502	0.048	0	4	KMO
AIF1	0	15.9991	0.929	0.04	0	4	AIF1	0	15.9991	0.929	0.04	0	4	AIF1
RIPK2	0	15.8937	0.532	0.183	0	4	RIPK2	0	15.8937	0.532	0.183	0	4	RIPK2
LCP2	0	15.8124	0.727	0.127	0	4	LCP2	0	15.8124	0.727	0.127	0	4	LCP2
STX11	0	15.6407	0.77	0.16	0	4	STX11	0	15.6407	0.77	0.16	0	4	STX11
GPR137B	0	15.5336	0.534	0.15	0	4	GPR137B	0	15.5336	0.534	0.15	0	4	GPR137B
HLA-DPA1	0	15.4947	0.834	0.146	0	4	HLA-DPA1	0	15.4947	0.834	0.146	0	4	HLA-DPA1
CSF1R	0	15.3696	0.632	0.021	0	4	CSF1R	0	15.3696	0.632	0.021	0	4	CSF1R
MFSD1	0	15.3127	0.655	0.166	0	4	MFSD1	0	15.3127	0.655	0.166	0	4	MFSD1
SERPINB9	0	15.1669	0.674	0.22	0	4	SERPINB9	0	15.1669	0.674	0.22	0	4	SERPINB9
CPVL	0	15.1321	0.655	0.077	0	4	CPVL	0	15.1321	0.655	0.077	0	4	CPVL
GPR183	0	15.0755	0.76	0.165	0	4	GPR183	0	15.0755	0.76	0.165	0	4	GPR183
SLC43A3	0	15.0442	0.518	0.155	0	4	SLC43A3	0	15.0442	0.518	0.155	0	4	SLC43A3
TFRC	0	14.3959	0.522	0.19	0	4	TFRC	0	14.3959	0.522	0.19	0	4	TFRC
OGFRL1	0	14.0945	0.524	0.097	0	4	OGFRL1	0	14.0945	0.524	0.097	0	4	OGFRL1
HLA-DRB5	0	13.9812	0.794	0.149	0	4	HLA-DRB5	0	13.9812	0.794	0.149	0	4	HLA-DRB5
TNFAIP8	0	13.7182	0.664	0.23	0	4	TNFAIP8	0	13.7182	0.664	0.23	0	4	TNFAIP8
HLA-DMB	0	13.5906	0.761	0.109	0	4	HLA-DMB	0	13.5906	0.761	0.109	0	4	HLA-DMB
ATF5	0	13.558	0.585	0.168	0	4	ATF5	0	13.558	0.585	0.168	0	4	ATF5
CD40	0	13.4342	0.582	0.193	0	4	CD40	0	13.4342	0.582	0.193	0	4	CD40
CAPG	0	13.3086	0.802	0.206	0	4	CAPG	0	13.3086	0.802	0.206	0	4	CAPG
CTSD	0	13.2087	0.676	0.153	0	4	CTSD	0	13.2087	0.676	0.153	0	4	CTSD
LY86	0	13.2075	0.611	0.084	0	4	LY86	0	13.2075	0.611	0.084	0	4	LY86
BCL2A1	0	13.0594	0.823	0.099	0	4	BCL2A1	0	13.0594	0.823	0.099	0	4	BCL2A1
SRGN	0	12.9918	0.814	0.297	0	4	SRGN	0	12.9918	0.814	0.297	0	4	SRGN
ITGB2	0	12.9003	0.839	0.194	0	4	ITGB2	0	12.9003	0.839	0.194	0	4	ITGB2
RNASE6	0	12.7902	0.632	0.066	0	4	RNASE6	0	12.7902	0.632	0.066	0	4	RNASE6
RASGRP3	0	12.7248	0.553	0.142	0	4	RASGRP3	0	12.7248	0.553	0.142	0	4	RASGRP3
G0S2	0	12.7094	0.811	0.067	0	4	G0S2	0	12.7094	0.811	0.067	0	4	G0S2
MNDA	0	12.3841	0.593	0.035	0	4	MNDA	0	12.3841	0.593	0.035	0	4	MNDA
CD74	0	12.3031	0.85	0.162	0	4	CD74	0	12.3031	0.85	0.162	0	4	CD74
BCAT1	0	12.1666	0.524	0.119	0	4	BCAT1	0	12.1666	0.524	0.119	0	4	BCAT1
LY96	0	12.0964	0.742	0.204	0	4	LY96	0	12.0964	0.742	0.204	0	4	LY96
MMP19	0	12.0596	0.556	0.107	0	4	MMP19	0	12.0596	0.556	0.107	0	4	MMP19
ITGAX	0	11.81	0.632	0.047	0	4	ITGAX	0	11.81	0.632	0.047	0	4	ITGAX
NINJ1	0	11.5125	0.841	0.204	0	4	NINJ1	0	11.5125	0.841	0.204	0	4	NINJ1
DSE	0	11.3463	0.646	0.12	0	4	DSE	0	11.3463	0.646	0.12	0	4	DSE
GPX1	0	11.2416	0.899	0.205	0	4	GPX1	0	11.2416	0.899	0.205	0	4	GPX1
SLC15A3	0	10.9349	0.578	0.081	0	4	SLC15A3	0	10.9349	0.578	0.081	0	4	SLC15A3
NAMPT	0	10.9122	0.876	0.23	0	4	NAMPT	0	10.9122	0.876	0.23	0	4	NAMPT
CD44	0	10.7969	0.743	0.29	0	4	CD44	0	10.7969	0.743	0.29	0	4	CD44
GNA13	0	10.7849	0.6	0.177	0	4	GNA13	0	10.7849	0.6	0.177	0	4	GNA13
CCL3	0	10.656	0.817	0.07	0	4	CCL3	0	10.656	0.817	0.07	0	4	CCL3
PDE4DIP	0	10.6498	0.625	0.143	0	4	PDE4DIP	0	10.6498	0.625	0.143	0	4	PDE4DIP
HLA-DPB1	0	10.5229	0.837	0.145	0	4	HLA-DPB1	0	10.5229	0.837	0.145	0	4	HLA-DPB1
MAP3K8	0	10.4642	0.658	0.263	0	4	MAP3K8	0	10.4642	0.658	0.263	0	4	MAP3K8
DRAM1	0	10.4294	0.585	0.149	0	4	DRAM1	0	10.4294	0.585	0.149	0	4	DRAM1
CXCL8	0	10.27	0.892	0.066	0	4	CXCL8	0	10.27	0.892	0.066	0	4	CXCL8
THEMIS2	0	10.1827	0.579	0.151	0	4	THEMIS2	0	10.1827	0.579	0.151	0	4	THEMIS2
PIK3AP1	0	9.9487	0.509	0.08	0	4	PIK3AP1	0	9.9487	0.509	0.08	0	4	PIK3AP1
GLIPR2	0	9.83559	0.584	0.233	0	4	GLIPR2	0	9.83559	0.584	0.233	0	4	GLIPR2
APOC1	0	9.79586	0.562	0.074	0	4	APOC1	0	9.79586	0.562	0.074	0	4	APOC1
CSTA	0	9.73238	0.664	0.059	0	4	CSTA	0	9.73238	0.664	0.059	0	4	CSTA
FCGR3A	0	9.71391	0.689	0.035	0	4	FCGR3A	0	9.71391	0.689	0.035	0	4	FCGR3A
STAT1	0	9.63011	0.591	0.241	0	4	STAT1	0	9.63011	0.591	0.241	0	4	STAT1
CECR1	0	9.56015	0.596	0.11	0	4	CECR1	0	9.56015	0.596	0.11	0	4	CECR1
WTAP	0	9.49645	0.642	0.319	0	4	WTAP	0	9.49645	0.642	0.319	0	4	WTAP
CCL4	0	9.47686	0.714	0.116	0	4	CCL4	0	9.47686	0.714	0.116	0	4	CCL4
CLEC7A	0	9.4556	0.705	0.054	0	4	CLEC7A	0	9.4556	0.705	0.054	0	4	CLEC7A
PLAUR	0	9.3989	0.905	0.113	0	4	PLAUR	0	9.3989	0.905	0.113	0	4	PLAUR
SH2B3	0	9.18922	0.561	0.131	0	4	SH2B3	0	9.18922	0.561	0.131	0	4	SH2B3
ASAH1	0	9.13556	0.825	0.238	0	4	ASAH1	0	9.13556	0.825	0.238	0	4	ASAH1
EPSTI1	0	9.02067	0.507	0.246	0	4	EPSTI1	0	9.02067	0.507	0.246	0	4	EPSTI1
HIF1A	0	8.94559	0.787	0.246	0	4	HIF1A	0	8.94559	0.787	0.246	0	4	HIF1A
CD4	0	8.90643	0.62	0.125	0	4	CD4	0	8.90643	0.62	0.125	0	4	CD4
S100A8	0	8.85972	0.553	0.059	0	4	S100A8	0	8.85972	0.553	0.059	0	4	S100A8
SIRPA	0	8.79932	0.597	0.091	0	4	SIRPA	0	8.79932	0.597	0.091	0	4	SIRPA
NFKB1	0	8.6697	0.802	0.221	0	4	NFKB1	0	8.6697	0.802	0.221	0	4	NFKB1
SLC2A3	0	8.63334	0.604	0.337	0	4	SLC2A3	0	8.63334	0.604	0.337	0	4	SLC2A3
ARL4C	0	8.61938	0.559	0.275	0	4	ARL4C	0	8.61938	0.559	0.275	0	4	ARL4C
BASP1	0	8.61818	0.674	0.215	0	4	BASP1	0	8.61818	0.674	0.215	0	4	BASP1
RNF130	0	8.6141	0.772	0.168	0	4	RNF130	0	8.6141	0.772	0.168	0	4	RNF130
CCL3L3	0	8.59622	0.791	0.064	0	4	CCL3L3	0	8.59622	0.791	0.064	0	4	CCL3L3
BNIP3L	0	8.49668	0.636	0.285	0	4	BNIP3L	0	8.49668	0.636	0.285	0	4	BNIP3L
IL1RN	0	8.21421	0.736	0.055	0	4	IL1RN	0	8.21421	0.736	0.055	0	4	IL1RN
NR4A3	0	8.19365	0.734	0.182	0	4	NR4A3	0	8.19365	0.734	0.182	0	4	NR4A3
HCST	0	8.14785	0.582	0.268	0	4	HCST	0	8.14785	0.582	0.268	0	4	HCST
COTL1	0	8.02849	0.705	0.278	0	4	COTL1	0	8.02849	0.705	0.278	0	4	COTL1
ZFYVE16	0	8.00423	0.569	0.138	0	4	ZFYVE16	0	8.00423	0.569	0.138	0	4	ZFYVE16
CD14	0	7.9286	0.807	0.043	0	4	CD14	0	7.9286	0.807	0.043	0	4	CD14
GNA15	0	7.88087	0.536	0.15	0	4	GNA15	0	7.88087	0.536	0.15	0	4	GNA15
ATP2B1	0	7.78958	0.566	0.304	0	4	ATP2B1	0	7.78958	0.566	0.304	0	4	ATP2B1
FAM49A	0	7.60804	0.574	0.159	0	4	FAM49A	0	7.60804	0.574	0.159	0	4	FAM49A
CTSL	0	7.53986	0.781	0.16	0	4	CTSL	0	7.53986	0.781	0.16	0	4	CTSL
CCL20	0	7.48389	0.573	0.104	0	4	CCL20	0	7.48389	0.573	0.104	0	4	CCL20
LITAF	0	7.2941	0.821	0.304	0	4	LITAF	0	7.2941	0.821	0.304	0	4	LITAF
SERPINB1	0	7.20013	0.589	0.262	0	4	SERPINB1	0	7.20013	0.589	0.262	0	4	SERPINB1
RP11-1143G9.4	0	7.15298	0.699	0.054	0	4	RP11-1143G9.4	0	7.15298	0.699	0.054	0	4	RP11-1143G9.4
FTH1	0	7.05384	0.894	0.195	0	4	FTH1	0	7.05384	0.894	0.195	0	4	FTH1
PTGS2	0	7.05092	0.689	0.114	0	4	PTGS2	0	7.05092	0.689	0.114	0	4	PTGS2
ZFAND5	0	6.69382	0.59	0.341	0	4	ZFAND5	0	6.69382	0.59	0.341	0	4	ZFAND5
PNRC1	0	6.69123	0.782	0.313	0	4	PNRC1	0	6.69123	0.782	0.313	0	4	PNRC1
EREG	0	6.58519	0.644	0.056	0	4	EREG	0	6.58519	0.644	0.056	0	4	EREG
HLA-DQA1	0	6.52133	0.778	0.129	0	4	HLA-DQA1	0	6.52133	0.778	0.129	0	4	HLA-DQA1
CCL4L2	0	6.51854	0.727	0.089	0	4	CCL4L2	0	6.51854	0.727	0.089	0	4	CCL4L2
RASSF4	0	6.40686	0.525	0.079	0	4	RASSF4	0	6.40686	0.525	0.079	0	4	RASSF4
LAP3	0	6.34245	0.618	0.253	0	4	LAP3	0	6.34245	0.618	0.253	0	4	LAP3
HLA-DQA2	0	6.3083	0.672	0.125	0	4	HLA-DQA2	0	6.3083	0.672	0.125	0	4	HLA-DQA2
EIF4A3	0	6.27734	0.555	0.337	0	4	EIF4A3	0	6.27734	0.555	0.337	0	4	EIF4A3
HLA-DRB1	0	6.24046	0.873	0.154	0	4	HLA-DRB1	0	6.24046	0.873	0.154	0	4	HLA-DRB1
HLA-DRA	0	6.21699	0.937	0.126	0	4	HLA-DRA	0	6.21699	0.937	0.126	0	4	HLA-DRA
FTL	0	6.19613	0.893	0.118	0	4	FTL	0	6.19613	0.893	0.118	0	4	FTL
YWHAH	0	6.10813	0.555	0.319	0	4	YWHAH	0	6.10813	0.555	0.319	0	4	YWHAH
HLA-DQB1	0	5.74966	0.789	0.142	0	4	HLA-DQB1	0	5.74966	0.789	0.142	0	4	HLA-DQB1
GK	0	5.63627	0.677	0.124	0	4	GK	0	5.63627	0.677	0.124	0	4	GK
MMP9	0	5.60867	0.598	0.053	0	4	MMP9	0	5.60867	0.598	0.053	0	4	MMP9
SOD2	0	5.57892	0.894	0.13	0	4	SOD2	0	5.57892	0.894	0.13	0	4	SOD2
ACP5	0	5.56796	0.656	0.175	0	4	ACP5	0	5.56796	0.656	0.175	0	4	ACP5
PDE4B	0	5.54721	0.573	0.285	0	4	PDE4B	0	5.54721	0.573	0.285	0	4	PDE4B
SLC25A19	0	5.44108	0.506	0.155	0	4	SLC25A19	0	5.44108	0.506	0.155	0	4	SLC25A19
LST1	0	5.35088	0.899	0.077	0	4	LST1	0	5.35088	0.899	0.077	0	4	LST1
CDK1	0	5.25558	0.633	0.294	0	4	CDK1	0	5.25558	0.633	0.294	0	4	CDK1
ARRB2	0	5.18172	0.581	0.158	0	4	ARRB2	0	5.18172	0.581	0.158	0	4	ARRB2
HLA-DMA	0	5.16846	0.827	0.189	0	4	HLA-DMA	0	5.16846	0.827	0.189	0	4	HLA-DMA
FNIP2	0	5.16825	0.716	0.142	0	4	FNIP2	0	5.16825	0.716	0.142	0	4	FNIP2
ANXA5	0	5.1435	0.878	0.332	0	4	ANXA5	0	5.1435	0.878	0.332	0	4	ANXA5
OTUD1	0	5.14014	0.617	0.138	0	4	OTUD1	0	5.14014	0.617	0.138	0	4	OTUD1
TPP1	0	5.09301	0.747	0.237	0	4	TPP1	0	5.09301	0.747	0.237	0	4	TPP1
C15orf48	0	5.06899	0.795	0.094	0	4	C15orf48	0	5.06899	0.795	0.094	0	4	C15orf48
RNASET2	0	5.03552	0.68	0.315	0	4	RNASET2	0	5.03552	0.68	0.315	0	4	RNASET2
CCDC88A	0	4.83616	0.546	0.16	0	4	CCDC88A	0	4.83616	0.546	0.16	0	4	CCDC88A
TREM1	0	4.81752	0.605	0.046	0	4	TREM1	0	4.81752	0.605	0.046	0	4	TREM1
LGALS9	0	4.81614	0.609	0.189	0	4	LGALS9	0	4.81614	0.609	0.189	0	4	LGALS9
TWISTNB	0	4.77889	0.59	0.225	0	4	TWISTNB	0	4.77889	0.59	0.225	0	4	TWISTNB
NCF2	0	4.71811	0.646	0.035	0	4	NCF2	0	4.71811	0.646	0.035	0	4	NCF2
VMO1	0	4.69625	0.507	0.043	0	4	VMO1	0	4.69625	0.507	0.043	0	4	VMO1
SLC43A2	0	4.67512	0.625	0.106	0	4	SLC43A2	0	4.67512	0.625	0.106	0	4	SLC43A2
VIM	0	4.66747	0.792	0.362	0	4	VIM	0	4.66747	0.792	0.362	0	4	VIM
LGALS2	0	4.48633	0.555	0.049	0	4	LGALS2	0	4.48633	0.555	0.049	0	4	LGALS2
CST3	0	4.47582	0.856	0.258	0	4	CST3	0	4.47582	0.856	0.258	0	4	CST3
LIMS1	0	4.45848	0.781	0.283	0	4	LIMS1	0	4.45848	0.781	0.283	0	4	LIMS1
ATP6V1F	0	4.42862	0.828	0.315	0	4	ATP6V1F	0	4.42862	0.828	0.315	0	4	ATP6V1F
IL4I1	0	4.42514	0.563	0.066	0	4	IL4I1	0	4.42514	0.563	0.066	0	4	IL4I1
LYN	0	4.38716	0.675	0.156	0	4	LYN	0	4.38716	0.675	0.156	0	4	LYN
FCGRT	0	4.37546	0.788	0.254	0	4	FCGRT	0	4.37546	0.788	0.254	0	4	FCGRT
S100A9	0	4.35307	0.745	0.046	0	4	S100A9	0	4.35307	0.745	0.046	0	4	S100A9
TNF	0	4.34044	0.56	0.084	0	4	TNF	0	4.34044	0.56	0.084	0	4	TNF
CXCL16	0	4.31772	0.7	0.136	0	4	CXCL16	0	4.31772	0.7	0.136	0	4	CXCL16
ALOX5AP	0	4.25444	0.538	0.224	0	4	ALOX5AP	0	4.25444	0.538	0.224	0	4	ALOX5AP
EPB41L3	0	4.24075	0.583	0.085	0	4	EPB41L3	0	4.24075	0.583	0.085	0	4	EPB41L3
CEBPB	0	4.23671	0.712	0.295	0	4	CEBPB	0	4.23671	0.712	0.295	0	4	CEBPB
GPNMB	0	4.1181	0.574	0.142	0	4	GPNMB	0	4.1181	0.574	0.142	0	4	GPNMB
ADGRE2	0	4.00612	0.535	0.071	0	4	ADGRE2	0	4.00612	0.535	0.071	0	4	ADGRE2
C10orf54	0	3.99167	0.575	0.305	0	4	C10orf54	0	3.99167	0.575	0.305	0	4	C10orf54
OSM	0	3.89623	0.509	0.058	0	4	OSM	1.58578e-280	3.89623	0.509	0.058	9.51468e-277	4	OSM
TMSB4X	0	3.85175	0.716	0.386	0	4	TMSB4X	0	3.85175	0.716	0.386	0	4	TMSB4X
CXCL3	0	3.80714	0.697	0.088	0	4	CXCL3	0	3.80714	0.697	0.088	0	4	CXCL3
HMOX1	0	3.80223	0.543	0.128	0	4	HMOX1	0	3.80223	0.543	0.128	0	4	HMOX1
CTSH	0	3.76511	0.789	0.221	0	4	CTSH	0	3.76511	0.789	0.221	0	4	CTSH
ABL2	0	3.76026	0.707	0.197	0	4	ABL2	0	3.76026	0.707	0.197	0	4	ABL2
SYNGR2	0	3.67784	0.549	0.266	0	4	SYNGR2	0	3.67784	0.549	0.266	0	4	SYNGR2
FERMT3	0	3.65617	0.567	0.155	0	4	FERMT3	0	3.65617	0.567	0.155	0	4	FERMT3
DUSP6	0	3.48018	0.531	0.181	0	4	DUSP6	0	3.48018	0.531	0.181	0	4	DUSP6
CD81	0	3.45743	0.579	0.3	0	4	CD81	0	3.45743	0.579	0.3	0	4	CD81
ZEB2	0	3.3572	0.689	0.271	0	4	ZEB2	0	3.3572	0.689	0.271	0	4	ZEB2
PFKFB3	0	3.35464	0.508	0.248	0	4	PFKFB3	1.75147e-176	3.35464	0.508	0.248	1.05088e-172	4	PFKFB3
TIMP11	0	3.34367	0.535	0.211	0	4	TIMP1	0	3.34367	0.535	0.211	0	4	TIMP1
HBEGF	0	3.29294	0.58	0.191	0	4	HBEGF	0	3.29294	0.58	0.191	0	4	HBEGF
NFKBIA1	0	3.21303	0.861	0.278	0	4	NFKBIA	0	3.21303	0.861	0.278	0	4	NFKBIA
LAPTM5	0	3.16292	0.79	0.291	0	4	LAPTM5	0	3.16292	0.79	0.291	0	4	LAPTM5
MAFB	0	3.14295	0.598	0.164	0	4	MAFB	0	3.14295	0.598	0.164	0	4	MAFB
QKI	0	3.11038	0.64	0.192	0	4	QKI	0	3.11038	0.64	0.192	0	4	QKI
IFI30	0	3.0082	0.665	0.062	0	4	IFI30	0	3.0082	0.665	0.062	0	4	IFI30
TNFSF13B	0	2.82908	0.714	0.128	0	4	TNFSF13B	0	2.82908	0.714	0.128	0	4	TNFSF13B
FOSL2	0	2.74434	0.687	0.274	0	4	FOSL2	0	2.74434	0.687	0.274	0	4	FOSL2
APOE1	0	2.73955	0.512	0.124	0	4	APOE	0	2.73955	0.512	0.124	0	4	APOE
CKLF	0	2.68659	0.527	0.322	0	4	CKLF	8.16969e-299	2.68659	0.527	0.322	4.90181e-295	4	CKLF
C1orf54	0	2.67839	0.537	0.141	0	4	C1orf54	0	2.67839	0.537	0.141	0	4	C1orf54
ATP1B3	0	2.63449	0.74	0.322	0	4	ATP1B3	0	2.63449	0.74	0.322	0	4	ATP1B3
CTSC	0	2.5956	0.658	0.236	0	4	CTSC	0	2.5956	0.658	0.236	0	4	CTSC
FAM49B	0	2.44835	0.722	0.278	0	4	FAM49B	0	2.44835	0.722	0.278	0	4	FAM49B
LCP1	0	2.40943	0.802	0.245	0	4	LCP1	0	2.40943	0.802	0.245	0	4	LCP1
MIR155HG	0	2.37115	0.531	0.128	0	4	MIR155HG	0	2.37115	0.531	0.128	0	4	MIR155HG
RBM471	0	2.36284	0.56	0.144	0	4	RBM47	0	2.36284	0.56	0.144	0	4	RBM47
ISG15	0	2.30792	0.504	0.247	0	4	ISG15	0	2.30792	0.504	0.247	0	4	ISG15
VAMP8	0	2.27405	0.78	0.284	0	4	VAMP8	0	2.27405	0.78	0.284	0	4	VAMP8
B4GALT1	0	2.21043	0.53	0.262	0	4	B4GALT1	2.2873e-213	2.21043	0.53	0.262	1.37238e-209	4	B4GALT1
IRF8	0	2.16091	0.534	0.154	0	4	IRF8	0	2.16091	0.534	0.154	0	4	IRF8
NPC2	0	2.1445	0.924	0.227	0	4	NPC2	0	2.1445	0.924	0.227	0	4	NPC2
FGL2	0	2.11923	0.626	0.139	0	4	FGL2	0	2.11923	0.626	0.139	0	4	FGL2
CASP1	0	2.11028	0.548	0.205	0	4	CASP1	0	2.11028	0.548	0.205	0	4	CASP1
TNFAIP21	0	2.05598	0.668	0.19	0	4	TNFAIP2	0	2.05598	0.668	0.19	0	4	TNFAIP2
SLC16A3	0	1.94928	0.716	0.225	0	4	SLC16A3	0	1.94928	0.716	0.225	0	4	SLC16A3
LYZ	0	1.7914	0.879	0.06	0	4	LYZ	0	1.7914	0.879	0.06	0	4	LYZ
PLIN2	0	1.75021	0.58	0.23	0	4	PLIN2	0	1.75021	0.58	0.23	0	4	PLIN2
HCLS1	0	1.52368	0.584	0.266	0	4	HCLS1	0	1.52368	0.584	0.266	0	4	HCLS1
PLXDC21	0	1.49003	0.599	0.153	0	4	PLXDC2	0	1.49003	0.599	0.153	0	4	PLXDC2
OSTF1	0	1.47857	0.522	0.313	0	4	OSTF1	3.11979e-106	1.47857	0.522	0.313	1.87187e-102	4	OSTF1
RASGEF1B	0	1.41215	0.571	0.146	0	4	RASGEF1B	0	1.41215	0.571	0.146	0	4	RASGEF1B
PPIF	0	1.16026	0.752	0.155	0	4	PPIF	0	1.16026	0.752	0.155	0	4	PPIF
MARCKS	0	1.1538	0.738	0.263	0	4	MARCKS	0	1.1538	0.738	0.263	0	4	MARCKS
ATP6V1B2	0	1.10087	0.655	0.17	0	4	ATP6V1B2	0	1.10087	0.655	0.17	0	4	ATP6V1B2
CSTB1	0	1.05053	0.656	0.243	0	4	CSTB	0	1.05053	0.656	0.243	0	4	CSTB
PTPN6	0	1.0268	0.511	0.165	0	4	PTPN6	0	1.0268	0.511	0.165	0	4	PTPN6
BANK1	0	28.2145	0.828	0.081	0	5	BANK1	0	28.2145	0.828	0.081	0	5	BANK1	B & Plasma cells
CD19	0	27.4716	0.597	0.078	0	5	CD19	0	27.4716	0.597	0.078	0	5	CD19
RP11-231C14.7	0	24.2619	0.521	0.112	0	5	RP11-231C14.7	1.53421e-245	24.2619	0.521	0.112	9.20526e-242	5	RP11-231C14.7
MS4A1	0	21.4125	0.882	0.092	0	5	MS4A1	0	21.4125	0.882	0.092	0	5	MS4A1
CD79B	0	20.9494	0.633	0.16	0	5	CD79B	0	20.9494	0.633	0.16	0	5	CD79B
NEIL1	0	20.8641	0.567	0.137	0	5	NEIL1	0	20.8641	0.567	0.137	0	5	NEIL1
TNFRSF13C	0	20.7928	0.764	0.08	0	5	TNFRSF13C	0	20.7928	0.764	0.08	0	5	TNFRSF13C
CD22	0	20.3833	0.535	0.102	0	5	CD22	2.24367e-248	20.3833	0.535	0.102	1.3462e-244	5	CD22
BLK	0	17.3814	0.575	0.082	0	5	BLK	0	17.3814	0.575	0.082	0	5	BLK
CD37	0	16.8095	0.927	0.296	0	5	CD37	0	16.8095	0.927	0.296	0	5	CD37
SMIM14	0	16.3096	0.747	0.258	0	5	SMIM14	0	16.3096	0.747	0.258	0	5	SMIM14
POU2F2	0	14.9958	0.559	0.153	0	5	POU2F2	0	14.9958	0.559	0.153	0	5	POU2F2
CD53	0	13.5934	0.669	0.343	0	5	CD53	0	13.5934	0.669	0.343	0	5	CD53
LIMD2	0	9.78572	0.641	0.301	0	5	LIMD2	0	9.78572	0.641	0.301	0	5	LIMD2
LY9	0	8.63148	0.81	0.106	0	5	LY9	0	8.63148	0.81	0.106	0	5	LY9
CXCR5	0	8.45556	0.57	0.099	0	5	CXCR5	3.48853e-303	8.45556	0.57	0.099	2.09312e-299	5	CXCR5
TNFRSF13B	0	8.29417	0.52	0.096	0	5	TNFRSF13B	0	8.29417	0.52	0.096	0	5	TNFRSF13B
AC079767.4	0	7.99078	0.526	0.076	0	5	AC079767.4	4.41961e-256	7.99078	0.526	0.076	2.65176e-252	5	AC079767.4
YPEL5	0	7.5487	0.757	0.323	0	5	YPEL5	0	7.5487	0.757	0.323	0	5	YPEL5
ORAI2	0	7.27729	0.575	0.2	0	5	ORAI2	0	7.27729	0.575	0.2	0	5	ORAI2
NR4A2	0	6.8472	0.612	0.321	0	5	NR4A2	0	6.8472	0.612	0.321	0	5	NR4A2
ZNF331	0	6.31632	0.651	0.312	0	5	ZNF331	0	6.31632	0.651	0.312	0	5	ZNF331
KIAA0226L	0	6.28675	0.63	0.098	0	5	KIAA0226L	0	6.28675	0.63	0.098	0	5	KIAA0226L
VPREB3	0	5.44077	0.721	0.091	0	5	VPREB3	0	5.44077	0.721	0.091	0	5	VPREB3
PRDM2	0	4.49941	0.613	0.218	0	5	PRDM2	0	4.49941	0.613	0.218	0	5	PRDM2
FCRLA	0	4.49103	0.522	0.069	0	5	FCRLA	0	4.49103	0.522	0.069	0	5	FCRLA
SNN	0	4.38171	0.534	0.149	0	5	SNN	3.36362e-275	4.38171	0.534	0.149	2.01817e-271	5	SNN
RGS19	0	4.09498	0.532	0.178	0	5	RGS19	3.99726e-242	4.09498	0.532	0.178	2.39836e-238	5	RGS19
S1PR2	0	3.94294	0.582	0.171	0	5	S1PR2	0	3.94294	0.582	0.171	0	5	S1PR2
REL	0	3.65609	0.657	0.312	0	5	REL	0	3.65609	0.657	0.312	0	5	REL
RBM38	0	3.62569	0.602	0.185	0	5	RBM38	0	3.62569	0.602	0.185	0	5	RBM38
RASGRP2	0	3.52499	0.52	0.143	0	5	RASGRP2	2.66258e-260	3.52499	0.52	0.143	1.59755e-256	5	RASGRP2
ALG13	0	3.48624	0.662	0.288	0	5	ALG13	0	3.48624	0.662	0.288	0	5	ALG13
MEF2C	0	3.31777	0.782	0.206	0	5	MEF2C	0	3.31777	0.782	0.206	0	5	MEF2C
CD831	0	3.29785	0.802	0.201	0	5	CD83	0	3.29785	0.802	0.201	0	5	CD83
RILPL2	0	3.25454	0.604	0.315	0	5	RILPL2	6.98037e-258	3.25454	0.604	0.315	4.18822e-254	5	RILPL2
EIF1AY	0	3.03022	0.522	0.2	0	5	EIF1AY	0	3.03022	0.522	0.2	0	5	EIF1AY
CXCR41	0	2.83721	0.742	0.275	0	5	CXCR4	0	2.83721	0.742	0.275	0	5	CXCR4
IRF81	0	2.51435	0.566	0.172	0	5	IRF8	1.59166e-296	2.51435	0.566	0.172	9.54995e-293	5	IRF8
CD69	0	2.41403	0.545	0.25	0	5	CD69	0	2.41403	0.545	0.25	0	5	CD69
CD79A1	0	2.19265	0.975	0.144	0	5	CD79A	0	2.19265	0.975	0.144	0	5	CD79A
PHACTR1	0	1.7061	0.526	0.151	0	5	PHACTR1	0	1.7061	0.526	0.151	0	5	PHACTR1
BTG11	0	1.67489	0.585	0.336	0	5	BTG1	0	1.67489	0.585	0.336	0	5	BTG1
RPS271	0	1.66708	0.917	0.315	0	5	RPS27	0	1.66708	0.917	0.315	0	5	RPS27
LAPTM51	0	1.51073	0.825	0.315	0	5	LAPTM5	0	1.51073	0.825	0.315	0	5	LAPTM5
FMNL1	0	1.36039	0.562	0.259	0	5	FMNL1	3.61226e-202	1.36039	0.562	0.259	2.16736e-198	5	FMNL1
NCF1	0	1.29226	0.516	0.215	0	5	NCF1	1.48652e-257	1.29226	0.516	0.215	8.91909e-254	5	NCF1
RPS291	0	1.15759	0.859	0.316	0	5	RPS29	0	1.15759	0.859	0.316	0	5	RPS29
EZR	0	1.12376	0.841	0.319	0	5	EZR	0	1.12376	0.841	0.319	0	5	EZR
INPP5D	0	1.0801	0.519	0.187	0	5	INPP5D	6.16387e-170	1.0801	0.519	0.187	3.69832e-166	5	INPP5D
CORO1A1	2.97028e-293	2.42932	0.545	0.311	1.78217e-289	5	CORO1A	1.44174e-233	2.42932	0.545	0.311	8.65042e-230	5	CORO1A
SELE	0	35.5839	0.663	0.011	0	6	SELE	0	35.5839	0.663	0.011	0	6	SELE	Endothelial cells
VWF	0	32.562	0.926	0.024	0	6	VWF	0	32.562	0.926	0.024	0	6	VWF
HYAL2	0	31.5111	0.896	0.145	0	6	HYAL2	0	31.5111	0.896	0.145	0	6	HYAL2
CDH5	0	30.8271	0.902	0.017	0	6	CDH5	0	30.8271	0.902	0.017	0	6	CDH5
SLCO2A1	0	29.694	0.787	0.019	0	6	SLCO2A1	0	29.694	0.787	0.019	0	6	SLCO2A1
CXorf36	0	29.3839	0.856	0.015	0	6	CXorf36	0	29.3839	0.856	0.015	0	6	CXorf36
CD320	0	28.8471	0.779	0.179	0	6	CD320	0	28.8471	0.779	0.179	0	6	CD320
MMRN2	0	28.5335	0.837	0.033	0	6	MMRN2	0	28.5335	0.837	0.033	0	6	MMRN2
TSPAN7	0	28.3751	0.814	0.044	0	6	TSPAN7	0	28.3751	0.814	0.044	0	6	TSPAN7
BCL6B	0	28.3678	0.788	0.028	0	6	BCL6B	0	28.3678	0.788	0.028	0	6	BCL6B
ERG	0	28.2576	0.837	0.031	0	6	ERG	0	28.2576	0.837	0.031	0	6	ERG
KANK3	0	27.8785	0.81	0.028	0	6	KANK3	0	27.8785	0.81	0.028	0	6	KANK3
MPZL2	0	27.3152	0.607	0.091	0	6	MPZL2	0	27.3152	0.607	0.091	0	6	MPZL2
MYCT1	0	27.2662	0.85	0.015	0	6	MYCT1	0	27.2662	0.85	0.015	0	6	MYCT1
JAG2	0	27.023	0.521	0.062	0	6	JAG2	5.4933e-222	27.023	0.521	0.062	3.29598e-218	6	JAG2
TGFBR2	0	26.8928	0.894	0.207	0	6	TGFBR2	0	26.8928	0.894	0.207	0	6	TGFBR2
PECAM1	0	26.7908	0.961	0.105	0	6	PECAM1	0	26.7908	0.961	0.105	0	6	PECAM1
PRCP	0	26.5775	0.671	0.256	0	6	PRCP	0	26.5775	0.671	0.256	0	6	PRCP
TMEM88	0	25.8755	0.659	0.083	0	6	TMEM88	0	25.8755	0.659	0.083	0	6	TMEM88
SELP	0	25.7142	0.603	0.02	0	6	SELP	0	25.7142	0.603	0.02	0	6	SELP
ADGRL4	0	25.5548	0.868	0.021	0	6	ADGRL4	0	25.5548	0.868	0.021	0	6	ADGRL4
ARHGEF15	0	25.3643	0.739	0.023	0	6	ARHGEF15	0	25.3643	0.739	0.023	0	6	ARHGEF15
ADM5	0	25.2488	0.579	0.05	0	6	ADM5	0	25.2488	0.579	0.05	0	6	ADM5
HEG1	0	25.1007	0.824	0.128	0	6	HEG1	0	25.1007	0.824	0.128	0	6	HEG1
CYYR1	0	25.0885	0.855	0.02	0	6	CYYR1	0	25.0885	0.855	0.02	0	6	CYYR1
PTPRB	0	25.0705	0.808	0.049	0	6	PTPRB	0	25.0705	0.808	0.049	0	6	PTPRB
MGLL	0	24.9689	0.765	0.212	0	6	MGLL	0	24.9689	0.765	0.212	0	6	MGLL
PCDH12	0	24.9164	0.648	0.025	0	6	PCDH12	0	24.9164	0.648	0.025	0	6	PCDH12
DOC2B	0	24.8972	0.66	0.036	0	6	DOC2B	0	24.8972	0.66	0.036	0	6	DOC2B
ARL15	0	24.5892	0.609	0.122	0	6	ARL15	0	24.5892	0.609	0.122	0	6	ARL15
ENG	0	24.2932	0.945	0.184	0	6	ENG	0	24.2932	0.945	0.184	0	6	ENG
JAM2	0	24.1604	0.833	0.072	0	6	JAM2	0	24.1604	0.833	0.072	0	6	JAM2
ECSCR.1	0	24.0694	0.963	0.015	0	6	ECSCR.1	0	24.0694	0.963	0.015	0	6	ECSCR.1
NOTCH4	0	23.8022	0.833	0.068	0	6	NOTCH4	0	23.8022	0.833	0.068	0	6	NOTCH4
PPFIBP1	0	23.7822	0.75	0.17	0	6	PPFIBP1	0	23.7822	0.75	0.17	0	6	PPFIBP1
TP53I11	0	23.194	0.514	0.163	0	6	TP53I11	1.4228e-288	23.194	0.514	0.163	8.53678e-285	6	TP53I11
APLNR	0	23.1744	0.804	0.015	0	6	APLNR	0	23.1744	0.804	0.015	0	6	APLNR
AFAP1L1	0	23.0068	0.696	0.045	0	6	AFAP1L1	0	23.0068	0.696	0.045	0	6	AFAP1L1
HSPG2	0	22.8695	0.922	0.155	0	6	HSPG2	0	22.8695	0.922	0.155	0	6	HSPG2
ROBO4	0	22.6025	0.84	0.026	0	6	ROBO4	0	22.6025	0.84	0.026	0	6	ROBO4
PCAT19	0	22.443	0.915	0.014	0	6	PCAT19	0	22.443	0.915	0.014	0	6	PCAT19
RAMP2	0	22.4089	0.986	0.057	0	6	RAMP2	0	22.4089	0.986	0.057	0	6	RAMP2
FLT4	0	22.3881	0.614	0.017	0	6	FLT4	0	22.3881	0.614	0.017	0	6	FLT4
ACE	0	22.2645	0.705	0.093	0	6	ACE	0	22.2645	0.705	0.093	0	6	ACE
RHOJ	0	22.1569	0.816	0.086	0	6	RHOJ	0	22.1569	0.816	0.086	0	6	RHOJ
SOX17	0	22.0669	0.771	0.023	0	6	SOX17	0	22.0669	0.771	0.023	0	6	SOX17
ADCY4	0	21.8532	0.656	0.054	0	6	ADCY4	0	21.8532	0.656	0.054	0	6	ADCY4
ACKR1	0	21.7031	0.573	0.031	0	6	ACKR1	0	21.7031	0.573	0.031	0	6	ACKR1
SHE	0	21.4254	0.766	0.054	0	6	SHE	0	21.4254	0.766	0.054	0	6	SHE
FCN3	0	21.3335	0.573	0.007	0	6	FCN3	0	21.3335	0.573	0.007	0	6	FCN3
EGFL7	0	21.097	0.924	0.075	0	6	EGFL7	0	21.097	0.924	0.075	0	6	EGFL7
RAMP3	0	20.9104	0.887	0.021	0	6	RAMP3	0	20.9104	0.887	0.021	0	6	RAMP3
PODXL	0	20.6635	0.825	0.06	0	6	PODXL	0	20.6635	0.825	0.06	0	6	PODXL
TIE1	0	20.614	0.862	0.021	0	6	TIE1	0	20.614	0.862	0.021	0	6	TIE1
WWTR1	0	20.5444	0.893	0.135	0	6	WWTR1	0	20.5444	0.893	0.135	0	6	WWTR1
INSR	0	20.2886	0.781	0.156	0	6	INSR	0	20.2886	0.781	0.156	0	6	INSR
RUNDC3B	0	20.2499	0.523	0.043	0	6	RUNDC3B	3.05964e-254	20.2499	0.523	0.043	1.83578e-250	6	RUNDC3B
SEMA3F	0	20.0968	0.641	0.042	0	6	SEMA3F	0	20.0968	0.641	0.042	0	6	SEMA3F
EXOC3L2	0	19.9551	0.602	0.025	0	6	EXOC3L2	0	19.9551	0.602	0.025	0	6	EXOC3L2
CLEC1A	0	19.5013	0.534	0.049	0	6	CLEC1A	2.44599e-208	19.5013	0.534	0.049	1.46759e-204	6	CLEC1A
SYNPO	0	19.4968	0.851	0.086	0	6	SYNPO	0	19.4968	0.851	0.086	0	6	SYNPO
GPRC5B	0	19.3773	0.753	0.073	0	6	GPRC5B	0	19.3773	0.753	0.073	0	6	GPRC5B
PTPRM	0	19.3371	0.748	0.111	0	6	PTPRM	0	19.3371	0.748	0.111	0	6	PTPRM
THSD7A	0	19.3019	0.72	0.037	0	6	THSD7A	0	19.3019	0.72	0.037	0	6	THSD7A
FAM110D	0	19.2672	0.66	0.016	0	6	FAM110D	0	19.2672	0.66	0.016	0	6	FAM110D
HSPA12B	0	19.1804	0.775	0.065	0	6	HSPA12B	0	19.1804	0.775	0.065	0	6	HSPA12B
EMCN	0	19.1707	0.855	0.03	0	6	EMCN	0	19.1707	0.855	0.03	0	6	EMCN
KIAA0355	0	18.9334	0.694	0.145	0	6	KIAA0355	0	18.9334	0.694	0.145	0	6	KIAA0355
USHBP1	0	18.7131	0.585	0.015	0	6	USHBP1	0	18.7131	0.585	0.015	0	6	USHBP1
CFAP20	0	18.7051	0.767	0.241	0	6	CFAP20	0	18.7051	0.767	0.241	0	6	CFAP20
LINC01235	0	18.649	0.627	0.013	0	6	LINC01235	0	18.649	0.627	0.013	0	6	LINC01235
NOSTRIN	0	18.6463	0.521	0.085	0	6	NOSTRIN	9.20848e-234	18.6463	0.521	0.085	5.52509e-230	6	NOSTRIN
ZNF385D	0	18.2571	0.674	0.039	0	6	ZNF385D	0	18.2571	0.674	0.039	0	6	ZNF385D
LDB2	0	18.2548	0.881	0.092	0	6	LDB2	0	18.2548	0.881	0.092	0	6	LDB2
S1PR1	0	17.7178	0.8	0.071	0	6	S1PR1	0	17.7178	0.8	0.071	0	6	S1PR1
LMO2	0	17.6827	0.843	0.061	0	6	LMO2	0	17.6827	0.843	0.061	0	6	LMO2
CLDN5	0	17.6271	0.95	0.023	0	6	CLDN5	0	17.6271	0.95	0.023	0	6	CLDN5
OLFM1	0	17.5037	0.61	0.115	0	6	OLFM1	0	17.5037	0.61	0.115	0	6	OLFM1
HECW2	0	17.5026	0.589	0.064	0	6	HECW2	0	17.5026	0.589	0.064	0	6	HECW2
GPIHBP1	0	17.2839	0.508	0.019	0	6	GPIHBP1	1.06764e-168	17.2839	0.508	0.019	6.40585e-165	6	GPIHBP1
MCF2L	0	17.2111	0.562	0.067	0	6	MCF2L	0	17.2111	0.562	0.067	0	6	MCF2L
MECOM	0	17.0572	0.557	0.077	0	6	MECOM	0	17.0572	0.557	0.077	0	6	MECOM
MKL2	0	16.9507	0.623	0.11	0	6	MKL2	0	16.9507	0.623	0.11	0	6	MKL2
LHX6	0	16.9346	0.514	0.011	0	6	LHX6	8.40867e-287	16.9346	0.514	0.011	5.0452e-283	6	LHX6
NFIB	0	16.8944	0.881	0.159	0	6	NFIB	0	16.8944	0.881	0.159	0	6	NFIB
MTUS1	0	16.8665	0.797	0.145	0	6	MTUS1	0	16.8665	0.797	0.145	0	6	MTUS1
RAI14	0	16.8528	0.814	0.11	0	6	RAI14	0	16.8528	0.814	0.11	0	6	RAI14
ACVRL1	0	16.7589	0.908	0.145	0	6	ACVRL1	0	16.7589	0.908	0.145	0	6	ACVRL1
ESAM	0	16.6908	0.897	0.05	0	6	ESAM	0	16.6908	0.897	0.05	0	6	ESAM
PCDH17	0	16.6576	0.844	0.026	0	6	PCDH17	0	16.6576	0.844	0.026	0	6	PCDH17
RP11-536O18.1	0	16.4078	0.638	0.019	0	6	RP11-536O18.1	0	16.4078	0.638	0.019	0	6	RP11-536O18.1
XAF1	0	16.3169	0.608	0.187	0	6	XAF1	0	16.3169	0.608	0.187	0	6	XAF1
TEK	0	16.2871	0.696	0.032	0	6	TEK	0	16.2871	0.696	0.032	0	6	TEK
LRRC32	0	16.2052	0.754	0.132	0	6	LRRC32	0	16.2052	0.754	0.132	0	6	LRRC32
F2RL3	0	15.9792	0.769	0.034	0	6	F2RL3	0	15.9792	0.769	0.034	0	6	F2RL3
SH2D3C	0	15.9667	0.611	0.056	0	6	SH2D3C	0	15.9667	0.611	0.056	0	6	SH2D3C
CCM2L	0	15.8154	0.627	0.025	0	6	CCM2L	0	15.8154	0.627	0.025	0	6	CCM2L
FKBP1A	0	15.4425	0.965	0.361	0	6	FKBP1A	0	15.4425	0.965	0.361	0	6	FKBP1A
SOX7	0	15.3512	0.758	0.026	0	6	SOX7	0	15.3512	0.758	0.026	0	6	SOX7
CD93	0	15.2133	0.855	0.079	0	6	CD93	0	15.2133	0.855	0.079	0	6	CD93
GJA5	0	15.1451	0.534	0.042	0	6	GJA5	0	15.1451	0.534	0.042	0	6	GJA5
PALMD	0	14.9997	0.741	0.051	0	6	PALMD	0	14.9997	0.741	0.051	0	6	PALMD
PLCB1	0	14.9262	0.719	0.095	0	6	PLCB1	0	14.9262	0.719	0.095	0	6	PLCB1
FAM167B	0	14.9028	0.834	0.024	0	6	FAM167B	0	14.9028	0.834	0.024	0	6	FAM167B
KDR	0	14.7396	0.828	0.019	0	6	KDR	0	14.7396	0.828	0.019	0	6	KDR
TBXA2R	0	14.7199	0.574	0.088	0	6	TBXA2R	0	14.7199	0.574	0.088	0	6	TBXA2R
PDE2A	0	14.7089	0.657	0.057	0	6	PDE2A	0	14.7089	0.657	0.057	0	6	PDE2A
GALNT18	0	14.4759	0.736	0.051	0	6	GALNT18	0	14.4759	0.736	0.051	0	6	GALNT18
PREX2	0	14.4664	0.662	0.072	0	6	PREX2	0	14.4664	0.662	0.072	0	6	PREX2
VASH1	0	14.4494	0.619	0.104	0	6	VASH1	0	14.4494	0.619	0.104	0	6	VASH1
DYSF	0	14.426	0.716	0.044	0	6	DYSF	0	14.426	0.716	0.044	0	6	DYSF
SWAP70	0	14.4191	0.863	0.181	0	6	SWAP70	0	14.4191	0.863	0.181	0	6	SWAP70
GIMAP1	0	14.4177	0.729	0.115	0	6	GIMAP1	0	14.4177	0.729	0.115	0	6	GIMAP1
LYVE1	0	14.3841	0.538	0.06	0	6	LYVE1	0	14.3841	0.538	0.06	0	6	LYVE1
PLXNA2	0	14.3588	0.749	0.113	0	6	PLXNA2	0	14.3588	0.749	0.113	0	6	PLXNA2
PIK3R3	0	14.2773	0.57	0.116	0	6	PIK3R3	1.36091e-257	14.2773	0.57	0.116	8.16545e-254	6	PIK3R3
RPS6KA2	0	14.2656	0.744	0.117	0	6	RPS6KA2	0	14.2656	0.744	0.117	0	6	RPS6KA2
FLT1	0	14.1466	0.826	0.047	0	6	FLT1	0	14.1466	0.826	0.047	0	6	FLT1
GIMAP8	0	14.1378	0.641	0.061	0	6	GIMAP8	0	14.1378	0.641	0.061	0	6	GIMAP8
LPAR6	0	14.1338	0.634	0.145	0	6	LPAR6	0	14.1338	0.634	0.145	0	6	LPAR6
VWA1	0	14.1164	0.76	0.107	0	6	VWA1	0	14.1164	0.76	0.107	0	6	VWA1
TM4SF18	0	13.9431	0.837	0.01	0	6	TM4SF18	0	13.9431	0.837	0.01	0	6	TM4SF18
EPAS1	0	13.8558	0.908	0.171	0	6	EPAS1	0	13.8558	0.908	0.171	0	6	EPAS1
MCTP1	0	13.8389	0.721	0.094	0	6	MCTP1	0	13.8389	0.721	0.094	0	6	MCTP1
PHLDB2	0	13.7366	0.546	0.128	0	6	PHLDB2	2.25567e-259	13.7366	0.546	0.128	1.3534e-255	6	PHLDB2
TFPI	0	13.7295	0.551	0.175	0	6	TFPI	0	13.7295	0.551	0.175	0	6	TFPI
FZD4	0	13.7174	0.631	0.082	0	6	FZD4	0	13.7174	0.631	0.082	0	6	FZD4
CD34	0	13.6831	0.869	0.062	0	6	CD34	0	13.6831	0.869	0.062	0	6	CD34
NOVA2	0	13.6763	0.669	0.025	0	6	NOVA2	0	13.6763	0.669	0.025	0	6	NOVA2
ATOH8	0	13.5716	0.562	0.087	0	6	ATOH8	0	13.5716	0.562	0.087	0	6	ATOH8
GRB10	0	13.5534	0.678	0.087	0	6	GRB10	0	13.5534	0.678	0.087	0	6	GRB10
TSPAN18	0	13.4851	0.584	0.078	0	6	TSPAN18	0	13.4851	0.584	0.078	0	6	TSPAN18
LIMCH1	0	13.4779	0.731	0.098	0	6	LIMCH1	0	13.4779	0.731	0.098	0	6	LIMCH1
ADAM15	0	13.2542	0.8	0.195	0	6	ADAM15	0	13.2542	0.8	0.195	0	6	ADAM15
ITGA9	0	13.162	0.516	0.09	0	6	ITGA9	1.10096e-222	13.162	0.516	0.09	6.60576e-219	6	ITGA9
SLC9A3R2	0	13.0788	0.918	0.15	0	6	SLC9A3R2	0	13.0788	0.918	0.15	0	6	SLC9A3R2
ARID5A	0	13.0519	0.604	0.32	0	6	ARID5A	5.21712e-271	13.0519	0.604	0.32	3.13027e-267	6	ARID5A
CSGALNACT1	0	12.8625	0.697	0.113	0	6	CSGALNACT1	0	12.8625	0.697	0.113	0	6	CSGALNACT1
TMTC1	0	12.8282	0.549	0.107	0	6	TMTC1	1.99543e-226	12.8282	0.549	0.107	1.19726e-222	6	TMTC1
BMPR2	0	12.802	0.768	0.182	0	6	BMPR2	0	12.802	0.768	0.182	0	6	BMPR2
SHANK3	0	12.7579	0.629	0.023	0	6	SHANK3	0	12.7579	0.629	0.023	0	6	SHANK3
CLIC2	0	12.7144	0.816	0.131	0	6	CLIC2	0	12.7144	0.816	0.131	0	6	CLIC2
TMEM255B	0	12.7088	0.824	0.078	0	6	TMEM255B	0	12.7088	0.824	0.078	0	6	TMEM255B
SH3BP5	0	12.6564	0.795	0.257	0	6	SH3BP5	0	12.6564	0.795	0.257	0	6	SH3BP5
HAPLN3	0	12.6041	0.559	0.167	0	6	HAPLN3	0	12.6041	0.559	0.167	0	6	HAPLN3
TNFAIP8L1	0	12.6022	0.642	0.133	0	6	TNFAIP8L1	0	12.6022	0.642	0.133	0	6	TNFAIP8L1
UNC5B	0	12.4344	0.614	0.123	0	6	UNC5B	0	12.4344	0.614	0.123	0	6	UNC5B
CALCRL	0	12.3404	0.834	0.049	0	6	CALCRL	0	12.3404	0.834	0.049	0	6	CALCRL
FAM69B	0	11.9436	0.596	0.023	0	6	FAM69B	0	11.9436	0.596	0.023	0	6	FAM69B
TLL1	0	11.7098	0.501	0.021	0	6	TLL1	1.70756e-177	11.7098	0.501	0.021	1.02453e-173	6	TLL1
FAM213A	0	11.5563	0.609	0.191	0	6	FAM213A	0	11.5563	0.609	0.191	0	6	FAM213A
CHST1	0	11.4738	0.528	0.045	0	6	CHST1	0	11.4738	0.528	0.045	0	6	CHST1
KIAA1683	0	11.3767	0.53	0.146	0	6	KIAA1683	2.17166e-266	11.3767	0.53	0.146	1.303e-262	6	KIAA1683
DOCK9	0	11.2582	0.76	0.106	0	6	DOCK9	0	11.2582	0.76	0.106	0	6	DOCK9
TMEM204	0	11.2322	0.792	0.141	0	6	TMEM204	0	11.2322	0.792	0.141	0	6	TMEM204
MAPK11	0	11.0555	0.649	0.094	0	6	MAPK11	0	11.0555	0.649	0.094	0	6	MAPK11
GPR146	0	10.9932	0.581	0.097	0	6	GPR146	0	10.9932	0.581	0.097	0	6	GPR146
PGM5	0	10.6375	0.529	0.066	0	6	PGM5	1.2494e-199	10.6375	0.529	0.066	7.49641e-196	6	PGM5
NPDC1	0	10.6196	0.907	0.223	0	6	NPDC1	0	10.6196	0.907	0.223	0	6	NPDC1
PLXND1	0	10.542	0.714	0.143	0	6	PLXND1	0	10.542	0.714	0.143	0	6	PLXND1
CRIM1	0	10.4725	0.808	0.143	0	6	CRIM1	0	10.4725	0.808	0.143	0	6	CRIM1
TCF4	0	10.4653	0.945	0.254	0	6	TCF4	0	10.4653	0.945	0.254	0	6	TCF4
TNFRSF10D	0	10.3463	0.797	0.101	0	6	TNFRSF10D	0	10.3463	0.797	0.101	0	6	TNFRSF10D
MFNG	0	10.278	0.55	0.163	0	6	MFNG	0	10.278	0.55	0.163	0	6	MFNG
FAM101B	0	10.2641	0.641	0.122	0	6	FAM101B	0	10.2641	0.641	0.122	0	6	FAM101B
FMNL3	0	10.0433	0.628	0.131	0	6	FMNL3	0	10.0433	0.628	0.131	0	6	FMNL3
ICAM2	0	9.96322	0.88	0.196	0	6	ICAM2	0	9.96322	0.88	0.196	0	6	ICAM2
PLVAP	0	9.85449	0.911	0.029	0	6	PLVAP	0	9.85449	0.911	0.029	0	6	PLVAP
PTRF	0	9.73884	0.97	0.191	0	6	PTRF	0	9.73884	0.97	0.191	0	6	PTRF
ADGRF5	0	9.73708	0.861	0.031	0	6	ADGRF5	0	9.73708	0.861	0.031	0	6	ADGRF5
SOX18	0	9.60635	0.789	0.018	0	6	SOX18	0	9.60635	0.789	0.018	0	6	SOX18
NES	0	9.5507	0.595	0.097	0	6	NES	0	9.5507	0.595	0.097	0	6	NES
NUAK1	0	9.5023	0.629	0.084	0	6	NUAK1	0	9.5023	0.629	0.084	0	6	NUAK1
GNG11	0	9.44317	0.997	0.165	0	6	GNG11	0	9.44317	0.997	0.165	0	6	GNG11
CX3CL1	0	9.141	0.624	0.07	0	6	CX3CL1	0	9.141	0.624	0.07	0	6	CX3CL1
KL	0	9.1356	0.558	0.013	0	6	KL	0	9.1356	0.558	0.013	0	6	KL
RAPGEF5	0	9.12789	0.716	0.063	0	6	RAPGEF5	0	9.12789	0.716	0.063	0	6	RAPGEF5
GBP4	0	9.11196	0.657	0.167	0	6	GBP4	0	9.11196	0.657	0.167	0	6	GBP4
EPHA4	0	9.01713	0.509	0.076	0	6	EPHA4	1.00764e-199	9.01713	0.509	0.076	6.04586e-196	6	EPHA4
PDGFB	0	8.98893	0.547	0.061	0	6	PDGFB	3.43123e-307	8.98893	0.547	0.061	2.05874e-303	6	PDGFB
STOM	0	8.94443	0.918	0.259	0	6	STOM	0	8.94443	0.918	0.259	0	6	STOM
KCTD12	0	8.93728	0.658	0.192	0	6	KCTD12	0	8.93728	0.658	0.192	0	6	KCTD12
ADAMTS7	0	8.89903	0.506	0.106	0	6	ADAMTS7	8.53219e-286	8.89903	0.506	0.106	5.11932e-282	6	ADAMTS7
FAM198B	0	8.88916	0.783	0.154	0	6	FAM198B	0	8.88916	0.783	0.154	0	6	FAM198B
LIMS2	0	8.8648	0.721	0.106	0	6	LIMS2	0	8.8648	0.721	0.106	0	6	LIMS2
SDPR	0	8.85248	0.815	0.076	0	6	SDPR	0	8.85248	0.815	0.076	0	6	SDPR
MAST4	0	8.83597	0.776	0.156	0	6	MAST4	0	8.83597	0.776	0.156	0	6	MAST4
PDLIM1	0	8.79805	0.924	0.253	0	6	PDLIM1	0	8.79805	0.924	0.253	0	6	PDLIM1
SEMA3G	0	8.78134	0.561	0.028	0	6	SEMA3G	0	8.78134	0.561	0.028	0	6	SEMA3G
INHBB	0	8.66379	0.657	0.033	0	6	INHBB	0	8.66379	0.657	0.033	0	6	INHBB
EFNB2	0	8.53587	0.673	0.268	0	6	EFNB2	0	8.53587	0.673	0.268	0	6	EFNB2
ARHGAP29	0	8.47033	0.872	0.115	0	6	ARHGAP29	0	8.47033	0.872	0.115	0	6	ARHGAP29
DLL4	0	8.35087	0.751	0.048	0	6	DLL4	0	8.35087	0.751	0.048	0	6	DLL4
GNAI2	0	8.32399	0.889	0.317	0	6	GNAI2	0	8.32399	0.889	0.317	0	6	GNAI2
GIMAP6	0	8.23536	0.768	0.089	0	6	GIMAP6	0	8.23536	0.768	0.089	0	6	GIMAP6
MEIS2	0	8.08193	0.666	0.143	0	6	MEIS2	0	8.08193	0.666	0.143	0	6	MEIS2
C2CD4B	0	8.04017	0.83	0.033	0	6	C2CD4B	0	8.04017	0.83	0.033	0	6	C2CD4B
DUSP23	0	7.99927	0.602	0.248	0	6	DUSP23	0	7.99927	0.602	0.248	0	6	DUSP23
BHLHE40	0	7.851	0.747	0.291	0	6	BHLHE40	0	7.851	0.747	0.291	0	6	BHLHE40
NEDD9	0	7.76562	0.642	0.195	0	6	NEDD9	0	7.76562	0.642	0.195	0	6	NEDD9
TNS2	0	7.74629	0.745	0.123	0	6	TNS2	0	7.74629	0.745	0.123	0	6	TNS2
CLEC14A	0	7.696	0.917	0.023	0	6	CLEC14A	0	7.696	0.917	0.023	0	6	CLEC14A
SPARCL1	0	7.66243	0.907	0.149	0	6	SPARCL1	0	7.66243	0.907	0.149	0	6	SPARCL1
FRY	0	7.63478	0.629	0.098	0	6	FRY	0	7.63478	0.629	0.098	0	6	FRY
AQP1	0	7.52605	0.695	0.079	0	6	AQP1	0	7.52605	0.695	0.079	0	6	AQP1
CYB5D2	0	7.48978	0.539	0.178	0	6	CYB5D2	3.92741e-202	7.48978	0.539	0.178	2.35645e-198	6	CYB5D2
DOCK6	0	7.38787	0.599	0.103	0	6	DOCK6	0	7.38787	0.599	0.103	0	6	DOCK6
ITM2B	0	7.3241	0.916	0.401	0	6	ITM2B	0	7.3241	0.916	0.401	0	6	ITM2B
SNRK	0	7.29351	0.637	0.159	0	6	SNRK	0	7.29351	0.637	0.159	0	6	SNRK
SPTBN1	0	7.24171	0.886	0.252	0	6	SPTBN1	0	7.24171	0.886	0.252	0	6	SPTBN1
EHD4	0	7.17249	0.709	0.205	0	6	EHD4	0	7.17249	0.709	0.205	0	6	EHD4
RASA4	0	7.15817	0.613	0.12	0	6	RASA4	0	7.15817	0.613	0.12	0	6	RASA4
MAGI1	0	7.07843	0.648	0.097	0	6	MAGI1	0	7.07843	0.648	0.097	0	6	MAGI1
ICAM1	0	7.04453	0.892	0.259	0	6	ICAM1	0	7.04453	0.892	0.259	0	6	ICAM1
SASH1	0	7.01386	0.759	0.136	0	6	SASH1	0	7.01386	0.759	0.136	0	6	SASH1
DLC1	0	6.95909	0.853	0.133	0	6	DLC1	0	6.95909	0.853	0.133	0	6	DLC1
RBP7	0	6.92123	0.638	0.043	0	6	RBP7	0	6.92123	0.638	0.043	0	6	RBP7
UGCG	0	6.87962	0.558	0.229	0	6	UGCG	2.9029e-262	6.87962	0.558	0.229	1.74174e-258	6	UGCG
SSH1	0	6.77307	0.748	0.145	0	6	SSH1	0	6.77307	0.748	0.145	0	6	SSH1
YBX3	0	6.75722	0.911	0.319	0	6	YBX3	0	6.75722	0.911	0.319	0	6	YBX3
PTPRE	0	6.74183	0.718	0.189	0	6	PTPRE	0	6.74183	0.718	0.189	0	6	PTPRE
CRIP2	0	6.74074	0.983	0.155	0	6	CRIP2	0	6.74074	0.983	0.155	0	6	CRIP2
ENPP2	0	6.71646	0.653	0.092	0	6	ENPP2	0	6.71646	0.653	0.092	0	6	ENPP2
CAV2	0	6.64818	0.853	0.143	0	6	CAV2	0	6.64818	0.853	0.143	0	6	CAV2
PTPRG	0	6.63679	0.516	0.119	0	6	PTPRG	1.286e-215	6.63679	0.516	0.119	7.71601e-212	6	PTPRG
SLC14A1	0	6.57956	0.543	0.044	0	6	SLC14A1	0	6.57956	0.543	0.044	0	6	SLC14A1
LRRC8C	0	6.52271	0.608	0.151	0	6	LRRC8C	0	6.52271	0.608	0.151	0	6	LRRC8C
LCN6	0	6.5085	0.636	0.02	0	6	LCN6	0	6.5085	0.636	0.02	0	6	LCN6
ARL4A	0	6.49685	0.52	0.301	0	6	ARL4A	7.02574e-49	6.49685	0.52	0.301	4.21544e-45	6	ARL4A
MIDN	0	6.41215	0.854	0.296	0	6	MIDN	0	6.41215	0.854	0.296	0	6	MIDN
RASIP1	0	6.3371	0.821	0.049	0	6	RASIP1	0	6.3371	0.821	0.049	0	6	RASIP1
CDH13	0	6.31553	0.681	0.086	0	6	CDH13	0	6.31553	0.681	0.086	0	6	CDH13
MSN	0	6.30945	0.873	0.354	0	6	MSN	0	6.30945	0.873	0.354	0	6	MSN
CD36	0	6.22856	0.577	0.082	0	6	CD36	0	6.22856	0.577	0.082	0	6	CD36
FAM107A	0	6.11726	0.71	0.063	0	6	FAM107A	0	6.11726	0.71	0.063	0	6	FAM107A
SPRY4-IT1	0	6.07849	0.535	0.064	0	6	SPRY4-IT1	0	6.07849	0.535	0.064	0	6	SPRY4-IT1
DDX58	0	6.05135	0.513	0.141	0	6	DDX58	1.64832e-243	6.05135	0.513	0.141	9.88994e-240	6	DDX58
RND1	0	5.96096	0.812	0.091	0	6	RND1	0	5.96096	0.812	0.091	0	6	RND1
PXDN	0	5.90234	0.718	0.129	0	6	PXDN	0	5.90234	0.718	0.129	0	6	PXDN
HEY1	0	5.86896	0.693	0.096	0	6	HEY1	0	5.86896	0.693	0.096	0	6	HEY1
LIFR	0	5.67646	0.524	0.079	0	6	LIFR	6.67525e-274	5.67646	0.524	0.079	4.00515e-270	6	LIFR
EVA1B	0	5.67058	0.701	0.195	0	6	EVA1B	0	5.67058	0.701	0.195	0	6	EVA1B
COL15A1	0	5.56756	0.796	0.118	0	6	COL15A1	0	5.56756	0.796	0.118	0	6	COL15A1
PARP14	0	5.56113	0.624	0.229	0	6	PARP14	0	5.56113	0.624	0.229	0	6	PARP14
APOLD1	0	5.53339	0.766	0.08	0	6	APOLD1	0	5.53339	0.766	0.08	0	6	APOLD1
FXYD6	0	5.52763	0.601	0.167	0	6	FXYD6	0	5.52763	0.601	0.167	0	6	FXYD6
PELO	0	5.5238	0.654	0.197	0	6	PELO	0	5.5238	0.654	0.197	0	6	PELO
VAMP5	0	5.51203	0.929	0.315	0	6	VAMP5	0	5.51203	0.929	0.315	0	6	VAMP5
PGF	0	5.50835	0.643	0.112	0	6	PGF	0	5.50835	0.643	0.112	0	6	PGF
LAMC1	0	5.40457	0.684	0.193	0	6	LAMC1	0	5.40457	0.684	0.193	0	6	LAMC1
TJP1	0	5.36299	0.675	0.159	0	6	TJP1	0	5.36299	0.675	0.159	0	6	TJP1
CNTNAP3B	0	5.35759	0.522	0.026	0	6	CNTNAP3B	2.50421e-196	5.35759	0.522	0.026	1.50253e-192	6	CNTNAP3B
LAMB2	0	5.32711	0.711	0.182	0	6	LAMB2	0	5.32711	0.711	0.182	0	6	LAMB2
ADAMTS9	0	5.31205	0.848	0.063	0	6	ADAMTS9	0	5.31205	0.848	0.063	0	6	ADAMTS9
SEC14L1	0	5.30768	0.757	0.252	0	6	SEC14L1	0	5.30768	0.757	0.252	0	6	SEC14L1
MYH9	0	5.29462	0.801	0.338	0	6	MYH9	0	5.29462	0.801	0.338	0	6	MYH9
ITGA6	0	5.2569	0.622	0.162	0	6	ITGA6	0	5.2569	0.622	0.162	0	6	ITGA6
PLPP1	0	5.16375	0.76	0.208	0	6	PLPP1	0	5.16375	0.76	0.208	0	6	PLPP1
STC1	0	5.1371	0.599	0.041	0	6	STC1	0	5.1371	0.599	0.041	0	6	STC1
RGS3	0	5.12334	0.797	0.155	0	6	RGS3	0	5.12334	0.797	0.155	0	6	RGS3
TMSB10	0	5.06336	0.866	0.394	0	6	TMSB10	0	5.06336	0.866	0.394	0	6	TMSB10
RBP5	0	5.04002	0.719	0.061	0	6	RBP5	0	5.04002	0.719	0.061	0	6	RBP5
VEGFC	0	4.99428	0.628	0.07	0	6	VEGFC	0	4.99428	0.628	0.07	0	6	VEGFC
SPRY1	0	4.94353	0.605	0.183	0	6	SPRY1	1.0769e-228	4.94353	0.605	0.183	6.4614e-225	6	SPRY1
ANGPT2	0	4.92917	0.78	0.061	0	6	ANGPT2	0	4.92917	0.78	0.061	0	6	ANGPT2
ZEB1	0	4.88077	0.772	0.195	0	6	ZEB1	0	4.88077	0.772	0.195	0	6	ZEB1
CCDC85B	0	4.81733	0.924	0.323	0	6	CCDC85B	0	4.81733	0.924	0.323	0	6	CCDC85B
PROS1	0	4.75092	0.643	0.148	0	6	PROS1	0	4.75092	0.643	0.148	0	6	PROS1
WARS	0	4.69542	0.775	0.22	0	6	WARS	0	4.69542	0.775	0.22	0	6	WARS
MEOX1	0	4.66587	0.61	0.041	0	6	MEOX1	0	4.66587	0.61	0.041	0	6	MEOX1
TM4SF1	0	4.61159	0.926	0.184	0	6	TM4SF1	0	4.61159	0.926	0.184	0	6	TM4SF1
FABP5	0	4.59887	0.705	0.218	0	6	FABP5	0	4.59887	0.705	0.218	0	6	FABP5
ETS2	0	4.57842	0.778	0.232	0	6	ETS2	0	4.57842	0.778	0.232	0	6	ETS2
PLS3	0	4.56088	0.795	0.185	0	6	PLS3	0	4.56088	0.795	0.185	0	6	PLS3
CNKSR3	0	4.3676	0.683	0.117	0	6	CNKSR3	0	4.3676	0.683	0.117	0	6	CNKSR3
PLLP	0	4.34956	0.517	0.066	0	6	PLLP	0	4.34956	0.517	0.066	0	6	PLLP
STMN1	0	4.32751	0.561	0.269	0	6	STMN1	2.58598e-255	4.32751	0.561	0.269	1.55159e-251	6	STMN1
ELMO1	0	4.305	0.682	0.172	0	6	ELMO1	0	4.305	0.682	0.172	0	6	ELMO1
ARMCX1	0	4.29371	0.598	0.18	0	6	ARMCX1	0	4.29371	0.598	0.18	0	6	ARMCX1
KLF41	0	4.19676	0.739	0.279	0	6	KLF4	0	4.19676	0.739	0.279	0	6	KLF4
THBD1	0	4.18118	0.811	0.116	0	6	THBD	0	4.18118	0.811	0.116	0	6	THBD
CAV11	0	4.11916	0.954	0.148	0	6	CAV1	0	4.11916	0.954	0.148	0	6	CAV1
PALM1	0	4.09176	0.535	0.126	0	6	PALM	4.24445e-238	4.09176	0.535	0.126	2.54667e-234	6	PALM
PCSK5	0	4.04876	0.519	0.129	0	6	PCSK5	0	4.04876	0.519	0.129	0	6	PCSK5
CETP	0	4.00348	0.517	0.038	0	6	CETP	0	4.00348	0.517	0.038	0	6	CETP
CASC15	0	3.98522	0.586	0.095	0	6	CASC15	0	3.98522	0.586	0.095	0	6	CASC15
GIMAP4	0	3.97305	0.815	0.155	0	6	GIMAP4	0	3.97305	0.815	0.155	0	6	GIMAP4
GJA11	0	3.89236	0.847	0.117	0	6	GJA1	0	3.89236	0.847	0.117	0	6	GJA1
ALPL	0	3.88448	0.524	0.068	0	6	ALPL	0	3.88448	0.524	0.068	0	6	ALPL
CSF3	0	3.87131	0.629	0.058	0	6	CSF3	0	3.87131	0.629	0.058	0	6	CSF3
APP	0	3.86667	0.959	0.285	0	6	APP	0	3.86667	0.959	0.285	0	6	APP
BACE21	0	3.78962	0.649	0.277	0	6	BACE2	0	3.78962	0.649	0.277	0	6	BACE2
PDE1C	0	3.74669	0.523	0.064	0	6	PDE1C	8.24638e-239	3.74669	0.523	0.064	4.94783e-235	6	PDE1C
HLX1	0	3.74376	0.679	0.131	0	6	HLX	0	3.74376	0.679	0.131	0	6	HLX
BAALC	0	3.7089	0.666	0.063	0	6	BAALC	0	3.7089	0.666	0.063	0	6	BAALC
TMEM233	0	3.68515	0.642	0.048	0	6	TMEM233	0	3.68515	0.642	0.048	0	6	TMEM233
CYTL1	0	3.64908	0.598	0.059	0	6	CYTL1	0	3.64908	0.598	0.059	0	6	CYTL1
FILIP11	0	3.61591	0.748	0.102	0	6	FILIP1	0	3.61591	0.748	0.102	0	6	FILIP1
LINC01197	0	3.61554	0.507	0.075	0	6	LINC01197	8.83964e-254	3.61554	0.507	0.075	5.30379e-250	6	LINC01197
GIMAP7	0	3.5876	0.704	0.163	0	6	GIMAP7	0	3.5876	0.704	0.163	0	6	GIMAP7
PDLIM5	0	3.49678	0.72	0.24	0	6	PDLIM5	0	3.49678	0.72	0.24	0	6	PDLIM5
MGST21	0	3.4251	0.853	0.219	0	6	MGST2	0	3.4251	0.853	0.219	0	6	MGST2
CTNNB1	0	3.41012	0.595	0.306	0	6	CTNNB1	2.8405e-235	3.41012	0.595	0.306	1.7043e-231	6	CTNNB1
ITGA1	0	3.30609	0.556	0.154	0	6	ITGA1	0	3.30609	0.556	0.154	0	6	ITGA1
PRKCDBP1	0	3.2964	0.878	0.207	0	6	PRKCDBP	0	3.2964	0.878	0.207	0	6	PRKCDBP
ACKR31	0	3.29496	0.611	0.136	0	6	ACKR3	0	3.29496	0.611	0.136	0	6	ACKR3
TCTEX1D1	0	3.26817	0.544	0.051	0	6	TCTEX1D1	4.04975e-237	3.26817	0.544	0.051	2.42985e-233	6	TCTEX1D1
SEPW11	0	3.22683	0.818	0.389	0	6	SEPW1	0	3.22683	0.818	0.389	0	6	SEPW1
PLEKHO2	0	3.19269	0.638	0.163	0	6	PLEKHO2	0	3.19269	0.638	0.163	0	6	PLEKHO2
ELK3	0	3.18533	0.818	0.177	0	6	ELK3	0	3.18533	0.818	0.177	0	6	ELK3
MCAM	0	3.13696	0.795	0.066	0	6	MCAM	0	3.13696	0.795	0.066	0	6	MCAM
COL4A21	0	3.10421	0.829	0.14	0	6	COL4A2	0	3.10421	0.829	0.14	0	6	COL4A2
SEMA6B	0	3.10008	0.666	0.097	0	6	SEMA6B	0	3.10008	0.666	0.097	0	6	SEMA6B
ADAMTS11	0	3.09792	0.773	0.141	0	6	ADAMTS1	0	3.09792	0.773	0.141	0	6	ADAMTS1
IGFBP31	0	3.06804	0.67	0.143	0	6	IGFBP3	0	3.06804	0.67	0.143	0	6	IGFBP3
FLI1	0	3.05503	0.636	0.153	0	6	FLI1	0	3.05503	0.636	0.153	0	6	FLI1
SOCS2	0	3.042	0.588	0.161	0	6	SOCS2	0	3.042	0.588	0.161	0	6	SOCS2
EMP21	0	3.03657	0.808	0.245	0	6	EMP2	0	3.03657	0.808	0.245	0	6	EMP2
ANXA2R	0	3.02161	0.535	0.139	0	6	ANXA2R	0	3.02161	0.535	0.139	0	6	ANXA2R
LINC00987	0	3.01958	0.568	0.079	0	6	LINC00987	0	3.01958	0.568	0.079	0	6	LINC00987
HERC1	0	3.01416	0.527	0.173	0	6	HERC1	2.09348e-210	3.01416	0.527	0.173	1.25609e-206	6	HERC1
BCAM	0	2.96731	0.911	0.075	0	6	BCAM	0	2.96731	0.911	0.075	0	6	BCAM
UTRN	0	2.95117	0.789	0.221	0	6	UTRN	0	2.95117	0.789	0.221	0	6	UTRN
ARRDC3	0	2.8913	0.687	0.254	0	6	ARRDC3	0	2.8913	0.687	0.254	0	6	ARRDC3
C10orf10	0	2.88651	0.559	0.135	0	6	C10orf10	2.3797e-259	2.88651	0.559	0.135	1.42782e-255	6	C10orf10
ICAM5	0	2.78935	0.559	0.076	0	6	ICAM5	0	2.78935	0.559	0.076	0	6	ICAM5
NGFRAP11	0	2.7631	0.874	0.277	0	6	NGFRAP1	0	2.7631	0.874	0.277	0	6	NGFRAP1
EPHX11	0	2.72356	0.614	0.195	0	6	EPHX1	0	2.72356	0.614	0.195	0	6	EPHX1
PITPNC1	0	2.71217	0.545	0.157	0	6	PITPNC1	0	2.71217	0.545	0.157	0	6	PITPNC1
CSF2RB	0	2.69057	0.623	0.12	0	6	CSF2RB	0	2.69057	0.623	0.12	0	6	CSF2RB
HHEX	0	2.68255	0.751	0.078	0	6	HHEX	0	2.68255	0.751	0.078	0	6	HHEX
LDLR1	0	2.64739	0.59	0.255	0	6	LDLR	7.73831e-236	2.64739	0.59	0.255	4.64299e-232	6	LDLR
IFI16	0	2.63275	0.823	0.357	0	6	IFI16	0	2.63275	0.823	0.357	0	6	IFI16
PHACTR21	0	2.5723	0.572	0.239	0	6	PHACTR2	3.69338e-182	2.5723	0.572	0.239	2.21603e-178	6	PHACTR2
SNTG2	0	2.52413	0.534	0.02	0	6	SNTG2	2.84871e-289	2.52413	0.534	0.02	1.70922e-285	6	SNTG2
NRGN	0	2.51821	0.578	0.068	0	6	NRGN	0	2.51821	0.578	0.068	0	6	NRGN
BMX	0	2.50899	0.557	0.018	0	6	BMX	1.87843e-299	2.50899	0.557	0.018	1.12706e-295	6	BMX
PPP1R10	0	2.49557	0.637	0.324	0	6	PPP1R10	7.67357e-270	2.49557	0.637	0.324	4.60414e-266	6	PPP1R10
ADAMTS41	0	2.49414	0.782	0.126	0	6	ADAMTS4	0	2.49414	0.782	0.126	0	6	ADAMTS4
SYNE2	0	2.49219	0.604	0.243	0	6	SYNE2	0	2.49219	0.604	0.243	0	6	SYNE2
CYP1B1	0	2.47264	0.545	0.104	0	6	CYP1B1	0	2.47264	0.545	0.104	0	6	CYP1B1
A2M1	0	2.44562	0.962	0.182	0	6	A2M	0	2.44562	0.962	0.182	0	6	A2M
FOXC1	0	2.38344	0.557	0.086	0	6	FOXC1	3.81425e-302	2.38344	0.557	0.086	2.28855e-298	6	FOXC1
C1orf541	0	2.37408	0.775	0.158	0	6	C1orf54	0	2.37408	0.775	0.158	0	6	C1orf54
IGFBP71	0	2.34473	0.976	0.187	0	6	IGFBP7	0	2.34473	0.976	0.187	0	6	IGFBP7
RAPGEF4	0	2.31346	0.59	0.036	0	6	RAPGEF4	0	2.31346	0.59	0.036	0	6	RAPGEF4
TBCD	0	2.30575	0.576	0.17	0	6	TBCD	0	2.30575	0.576	0.17	0	6	TBCD
CREBRF	0	2.27649	0.627	0.245	0	6	CREBRF	0	2.27649	0.627	0.245	0	6	CREBRF
TNFSF121	0	2.24232	0.546	0.206	0	6	TNFSF12	3.45134e-261	2.24232	0.546	0.206	2.0708e-257	6	TNFSF12
RCAN1	0	2.23934	0.731	0.161	0	6	RCAN1	0	2.23934	0.731	0.161	0	6	RCAN1
PTMS1	0	2.18226	0.881	0.337	0	6	PTMS	0	2.18226	0.881	0.337	0	6	PTMS
NKX2-31	0	2.15765	0.536	0.115	0	6	NKX2-3	0	2.15765	0.536	0.115	0	6	NKX2-3
HES11	0	2.15603	0.891	0.217	0	6	HES1	0	2.15603	0.891	0.217	0	6	HES1
ECE1	0	2.10889	0.793	0.176	0	6	ECE1	0	2.10889	0.793	0.176	0	6	ECE1
LAMA41	0	2.09996	0.699	0.173	0	6	LAMA4	0	2.09996	0.699	0.173	0	6	LAMA4
SNCG	0	2.08734	0.818	0.06	0	6	SNCG	0	2.08734	0.818	0.06	0	6	SNCG
IL3RA	0	2.03974	0.762	0.07	0	6	IL3RA	0	2.03974	0.762	0.07	0	6	IL3RA
EMP11	0	2.01849	0.913	0.23	0	6	EMP1	0	2.01849	0.913	0.23	0	6	EMP1
GBP1	0	1.92892	0.557	0.209	0	6	GBP1	0	1.92892	0.557	0.209	0	6	GBP1
LAMB11	0	1.83781	0.664	0.164	0	6	LAMB1	0	1.83781	0.664	0.164	0	6	LAMB1
RGS161	0	1.82615	0.631	0.208	0	6	RGS16	0	1.82615	0.631	0.208	0	6	RGS16
TSPAN14	0	1.81956	0.662	0.195	0	6	TSPAN14	0	1.81956	0.662	0.195	0	6	TSPAN14
CLIC4	0	1.81473	0.808	0.255	0	6	CLIC4	0	1.81473	0.808	0.255	0	6	CLIC4
TNFSF10	0	1.80579	0.83	0.228	0	6	TNFSF10	0	1.80579	0.83	0.228	0	6	TNFSF10
IFIT1	0	1.6109	0.531	0.142	0	6	IFIT1	0	1.6109	0.531	0.142	0	6	IFIT1
IFI271	0	1.57725	0.905	0.228	0	6	IFI27	0	1.57725	0.905	0.228	0	6	IFI27
KLF91	0	1.57288	0.706	0.217	0	6	KLF9	0	1.57288	0.706	0.217	0	6	KLF9
FRMD4A	0	1.55657	0.675	0.13	0	6	FRMD4A	0	1.55657	0.675	0.13	0	6	FRMD4A
TIMP31	0	1.46388	0.769	0.193	0	6	TIMP3	0	1.46388	0.769	0.193	0	6	TIMP3
STAT3	0	1.41908	0.707	0.368	0	6	STAT3	0	1.41908	0.707	0.368	0	6	STAT3
PTMA	0	1.29888	0.738	0.429	0	6	PTMA	0	1.29888	0.738	0.429	0	6	PTMA
SCGB3A1	0	1.23591	0.539	0.043	0	6	SCGB3A1	7.86586e-244	1.23591	0.539	0.043	4.71951e-240	6	SCGB3A1
SERPINE1	0	1.19794	0.715	0.107	0	6	SERPINE1	0	1.19794	0.715	0.107	0	6	SERPINE1
C4orf32	0	1.19615	0.699	0.145	0	6	C4orf32	0	1.19615	0.699	0.145	0	6	C4orf32
IGF2	0	1.14795	0.551	0.148	0	6	IGF2	4.99667e-306	1.14795	0.551	0.148	2.998e-302	6	IGF2
IFIT3	0	1.13902	0.561	0.142	0	6	IFIT3	0	1.13902	0.561	0.142	0	6	IFIT3
RAC11	0	1.11517	0.721	0.376	0	6	RAC1	0	1.11517	0.721	0.376	0	6	RAC1
MAP1B1	0	1.1047	0.659	0.13	0	6	MAP1B	0	1.1047	0.659	0.13	0	6	MAP1B
ABCG1	0	1.10132	0.613	0.164	0	6	ABCG1	0	1.10132	0.613	0.164	0	6	ABCG1
HSPB1	0	1.09784	0.857	0.294	0	6	HSPB1	0	1.09784	0.857	0.294	0	6	HSPB1
NOV	0	1.01636	0.537	0.082	0	6	NOV	1.91781e-281	1.01636	0.537	0.082	1.15069e-277	6	NOV
XIST	3.896322413413e-310	2.62502	0.635	0.369	2.33779e-306	6	XIST	5.63439e-207	2.62502	0.635	0.369	3.38063e-203	6	XIST
FOSL21	4.30347e-272	2.18658	0.566	0.31	2.58208e-268	6	FOSL2	1.2e-141	2.18658	0.566	0.31	7.19998e-138	6	FOSL2
HLA-F	9.56549e-188	1.12738	0.572	0.34	5.73929e-184	6	HLA-F	3.29614e-249	1.12738	0.572	0.34	1.97768e-245	6	HLA-F
CHADL	0	23.8247	0.686	0.111	0	7	CHADL	9.04341e-212	23.8247	0.686	0.111	5.42604e-208	7	CHADL	Enteric glial cells
ANK3	0	23.7994	0.906	0.103	0	7	ANK3	0	23.7994	0.906	0.103	0	7	ANK3
ARHGAP15	0	22.7585	0.845	0.243	0	7	ARHGAP15	2.10254e-265	22.7585	0.845	0.243	1.26152e-261	7	ARHGAP15
PRNP	0	22.1373	0.983	0.348	0	7	PRNP	0	22.1373	0.983	0.348	0	7	PRNP
GPR155	0	21.8203	0.906	0.124	0	7	GPR155	0	21.8203	0.906	0.124	0	7	GPR155
COL28A1	0	20.9747	0.869	0.063	0	7	COL28A1	0	20.9747	0.869	0.063	0	7	COL28A1
HAND2-AS1	0	20.5615	0.82	0.096	0	7	HAND2-AS1	1.05369e-301	20.5615	0.82	0.096	6.32217e-298	7	HAND2-AS1
SLC22A17	0	19.9368	0.89	0.153	0	7	SLC22A17	0	19.9368	0.89	0.153	0	7	SLC22A17
SOX10	0	19.9328	0.779	0.077	0	7	SOX10	7.06759e-227	19.9328	0.779	0.077	4.24055e-223	7	SOX10
ST6GALNAC2	0	19.8981	0.566	0.093	0	7	ST6GALNAC2	1.52947e-49	19.8981	0.566	0.093	9.1768e-46	7	ST6GALNAC2
TSPAN11	0	19.7146	0.894	0.092	0	7	TSPAN11	0	19.7146	0.894	0.092	0	7	TSPAN11
IL11RA	0	18.8446	0.697	0.163	0	7	IL11RA	3.80988e-206	18.8446	0.697	0.163	2.28593e-202	7	IL11RA
AP1S2	0	18.2968	0.94	0.293	0	7	AP1S2	0	18.2968	0.94	0.293	0	7	AP1S2
CNN3	0	17.9857	0.984	0.254	0	7	CNN3	0	17.9857	0.984	0.254	0	7	CNN3
CADM4	0	17.8312	0.807	0.069	0	7	CADM4	0	17.8312	0.807	0.069	0	7	CADM4
PCSK2	0	17.7204	0.885	0.093	0	7	PCSK2	0	17.7204	0.885	0.093	0	7	PCSK2
FLRT1	0	17.6469	0.558	0.051	0	7	FLRT1	1.72295e-37	17.6469	0.558	0.051	1.03377e-33	7	FLRT1
PRIMA1	0	17.4376	0.799	0.079	0	7	PRIMA1	2.98006e-256	17.4376	0.799	0.079	1.78804e-252	7	PRIMA1
NRXN3	0	17.3513	0.755	0.068	0	7	NRXN3	5.30846e-222	17.3513	0.755	0.068	3.18508e-218	7	NRXN3
TIMP4	0	16.6605	0.509	0.101	0	7	TIMP4	3.76693e-25	16.6605	0.509	0.101	2.26016e-21	7	TIMP4
PTPRZ1	0	16.4921	0.698	0.09	0	7	PTPRZ1	1.96926e-155	16.4921	0.698	0.09	1.18156e-151	7	PTPRZ1
GRB14	0	16.2123	0.666	0.027	0	7	GRB14	8.70836e-239	16.2123	0.666	0.027	5.22502e-235	7	GRB14
PLEKHB1	0	16.202	0.866	0.12	0	7	PLEKHB1	0	16.202	0.866	0.12	0	7	PLEKHB1
GFRA3	0	15.9143	0.924	0.099	0	7	GFRA3	0	15.9143	0.924	0.099	0	7	GFRA3
CADM2	0	15.586	0.818	0.086	0	7	CADM2	4.12778e-279	15.586	0.818	0.086	2.47667e-275	7	CADM2
SRCIN1	0	15.5837	0.656	0.042	0	7	SRCIN1	1.92614e-235	15.5837	0.656	0.042	1.15568e-231	7	SRCIN1
CTNNAL1	0	15.1325	0.915	0.186	0	7	CTNNAL1	0	15.1325	0.915	0.186	0	7	CTNNAL1
NDRG2	0	14.9655	0.91	0.182	0	7	NDRG2	0	14.9655	0.91	0.182	0	7	NDRG2
KCNMB4	0	14.9552	0.571	0.096	0	7	KCNMB4	2.75027e-77	14.9552	0.571	0.096	1.65016e-73	7	KCNMB4
SHISA9	0	14.3421	0.62	0.027	0	7	SHISA9	3.22137e-169	14.3421	0.62	0.027	1.93282e-165	7	SHISA9
LINC00462	0	14.2161	0.724	0.013	0	7	LINC00462	1.07492e-245	14.2161	0.724	0.013	6.44955e-242	7	LINC00462
RP11-21A7A.4	0	13.9308	0.669	0.048	0	7	RP11-21A7A.4	1.48505e-134	13.9308	0.669	0.048	8.91033e-131	7	RP11-21A7A.4
CMTM5	0	13.87	0.823	0.122	0	7	CMTM5	8.67635e-272	13.87	0.823	0.122	5.20581e-268	7	CMTM5
GPM6B	0	13.8078	0.994	0.109	0	7	GPM6B	0	13.8078	0.994	0.109	0	7	GPM6B
B4GALNT1	0	13.8046	0.73	0.06	0	7	B4GALNT1	0	13.8046	0.73	0.06	0	7	B4GALNT1
RDX	0	13.4248	0.948	0.271	0	7	RDX	0	13.4248	0.948	0.271	0	7	RDX
FEZ1	0	13.1619	0.907	0.166	0	7	FEZ1	0	13.1619	0.907	0.166	0	7	FEZ1
ART3	0	13.0174	0.536	0.066	0	7	ART3	9.51754e-41	13.0174	0.536	0.066	5.71053e-37	7	ART3
FIGN	0	12.9411	0.707	0.102	0	7	FIGN	8.96311e-207	12.9411	0.707	0.102	5.37787e-203	7	FIGN
L1CAM	0	12.6198	0.904	0.053	0	7	L1CAM	0	12.6198	0.904	0.053	0	7	L1CAM
MPZ	0	12.0755	0.947	0.1	0	7	MPZ	0	12.0755	0.947	0.1	0	7	MPZ
FAM126A	0	11.8521	0.811	0.187	0	7	FAM126A	1.58253e-265	11.8521	0.811	0.187	9.49521e-262	7	FAM126A
CAPS	0	11.8464	0.78	0.2	0	7	CAPS	1.36199e-259	11.8464	0.78	0.2	8.17192e-256	7	CAPS
EPB41L2	0	11.715	0.925	0.249	0	7	EPB41L2	0	11.715	0.925	0.249	0	7	EPB41L2
PMP22	0	11.7139	0.996	0.27	0	7	PMP22	0	11.7139	0.996	0.27	0	7	PMP22
DMD	0	11.5843	0.65	0.119	0	7	DMD	2.21566e-127	11.5843	0.65	0.119	1.3294e-123	7	DMD
ARHGAP24	0	11.3574	0.791	0.158	0	7	ARHGAP24	2.5613e-205	11.3574	0.791	0.158	1.53678e-201	7	ARHGAP24
HSPA12A	0	10.8448	0.821	0.108	0	7	HSPA12A	0	10.8448	0.821	0.108	0	7	HSPA12A
CRYAB	0	10.4924	1	0.158	0	7	CRYAB	0	10.4924	1	0.158	0	7	CRYAB
PLP1	0	10.4454	0.989	0.117	0	7	PLP1	0	10.4454	0.989	0.117	0	7	PLP1
MYOT	0	10.4342	0.951	0.1	0	7	MYOT	0	10.4342	0.951	0.1	0	7	MYOT
LGI4	0	9.41519	0.974	0.092	0	7	LGI4	0	9.41519	0.974	0.092	0	7	LGI4
SAMHD1	0	9.35064	0.849	0.223	0	7	SAMHD1	3.58752e-263	9.35064	0.849	0.223	2.15251e-259	7	SAMHD1
CDH19	0	9.34011	0.948	0.094	0	7	CDH19	0	9.34011	0.948	0.094	0	7	CDH19
NRXN1	0	9.2344	0.969	0.113	0	7	NRXN1	0	9.2344	0.969	0.113	0	7	NRXN1
CD9	0	9.18665	0.989	0.284	0	7	CD9	0	9.18665	0.989	0.284	0	7	CD9
FXYD1	0	8.92554	0.991	0.163	0	7	FXYD1	0	8.92554	0.991	0.163	0	7	FXYD1
ADD3	0	8.82516	0.856	0.27	0	7	ADD3	2.57253e-271	8.82516	0.856	0.27	1.54352e-267	7	ADD3
INTS6	0	8.80353	0.891	0.32	0	7	INTS6	0	8.80353	0.891	0.32	0	7	INTS6
XKR4	0	8.75651	0.853	0.093	0	7	XKR4	0	8.75651	0.853	0.093	0	7	XKR4
ANK2	0	8.62898	0.685	0.118	0	7	ANK2	3.22963e-194	8.62898	0.685	0.118	1.93778e-190	7	ANK2
S100A1	0	8.42555	0.874	0.053	0	7	S100A1	0	8.42555	0.874	0.053	0	7	S100A1
PMP2	0	8.26165	0.768	0.084	0	7	PMP2	2.25018e-229	8.26165	0.768	0.084	1.35011e-225	7	PMP2
FOXD3-AS1	0	8.23592	0.866	0.05	0	7	FOXD3-AS1	0	8.23592	0.866	0.05	0	7	FOXD3-AS1
HAND2	0	8.21184	0.823	0.108	0	7	HAND2	0	8.21184	0.823	0.108	0	7	HAND2
RASGEF1C	0	7.98856	0.666	0.046	0	7	RASGEF1C	7.52182e-114	7.98856	0.666	0.046	4.51309e-110	7	RASGEF1C
SEMA6D	0	7.92868	0.697	0.087	0	7	SEMA6D	6.16932e-158	7.92868	0.697	0.087	3.70159e-154	7	SEMA6D
NLGN4X	0	7.7799	0.82	0.069	0	7	NLGN4X	0	7.7799	0.82	0.069	0	7	NLGN4X
SCN7A	0	7.75415	0.928	0.121	0	7	SCN7A	0	7.75415	0.928	0.121	0	7	SCN7A
HEPN1	0	7.71213	0.661	0.059	0	7	HEPN1	1.94765e-117	7.71213	0.661	0.059	1.16859e-113	7	HEPN1
ALDH1A1	0	7.54015	0.99	0.176	0	7	ALDH1A1	0	7.54015	0.99	0.176	0	7	ALDH1A1
NRN1	0	7.52222	0.893	0.078	0	7	NRN1	0	7.52222	0.893	0.078	0	7	NRN1
FADS3	0	7.50461	0.79	0.201	0	7	FADS3	5.63491e-232	7.50461	0.79	0.201	3.38095e-228	7	FADS3
FOXD3	0	7.36902	0.693	0.049	0	7	FOXD3	3.62243e-141	7.36902	0.693	0.049	2.17346e-137	7	FOXD3
NKAIN3	0	7.36656	0.772	0.046	0	7	NKAIN3	2.57769e-238	7.36656	0.772	0.046	1.54661e-234	7	NKAIN3
SORCS1	0	7.35781	0.823	0.073	0	7	SORCS1	1.11349e-283	7.35781	0.823	0.073	6.68095e-280	7	SORCS1
DKK3	0	7.28773	0.979	0.174	0	7	DKK3	0	7.28773	0.979	0.174	0	7	DKK3
CADM1	0	7.22928	0.871	0.149	0	7	CADM1	0	7.22928	0.871	0.149	0	7	CADM1
MGAT4C	0	7.09844	0.823	0.043	0	7	MGAT4C	9.63761e-287	7.09844	0.823	0.043	5.78257e-283	7	MGAT4C
NGFR	0	7.05194	0.86	0.076	0	7	NGFR	0	7.05194	0.86	0.076	0	7	NGFR
LPAR1	0	6.99526	0.763	0.128	0	7	LPAR1	2.00359e-287	6.99526	0.763	0.128	1.20216e-283	7	LPAR1
ASPA	0	6.96587	0.845	0.097	0	7	ASPA	0	6.96587	0.845	0.097	0	7	ASPA
IGSF11	0	6.94874	0.615	0.02	0	7	IGSF11	9.14813e-102	6.94874	0.615	0.02	5.48888e-98	7	IGSF11
TMEM59L	0	6.89097	0.75	0.07	0	7	TMEM59L	0	6.89097	0.75	0.07	0	7	TMEM59L
NTM	0	6.85709	0.903	0.091	0	7	NTM	0	6.85709	0.903	0.091	0	7	NTM
KIRREL3	0	6.81383	0.726	0.019	0	7	KIRREL3	4.44732e-201	6.81383	0.726	0.019	2.66839e-197	7	KIRREL3
HEPACAM	0	6.76072	0.589	0.106	0	7	HEPACAM	3.48817e-59	6.76072	0.589	0.106	2.0929e-55	7	HEPACAM
S100B	0	6.71265	0.996	0.088	0	7	S100B	0	6.71265	0.996	0.088	0	7	S100B
SH3BGR	0	6.71109	0.725	0.104	0	7	SH3BGR	1.42675e-265	6.71109	0.725	0.104	8.56053e-262	7	SH3BGR
PHLDA3	0	6.69474	0.861	0.2	0	7	PHLDA3	0	6.69474	0.861	0.2	0	7	PHLDA3
SERPINA5	0	6.5651	0.829	0.057	0	7	SERPINA5	5.05878e-291	6.5651	0.829	0.057	3.03527e-287	7	SERPINA5
TTR	0	6.54378	0.822	0.037	0	7	TTR	0	6.54378	0.822	0.037	0	7	TTR
TMEM176A	0	6.54253	0.881	0.286	0	7	TMEM176A	7.91118e-266	6.54253	0.881	0.286	4.74671e-262	7	TMEM176A
GRIK3	0	6.45872	0.74	0.046	0	7	GRIK3	2.2509e-204	6.45872	0.74	0.046	1.35054e-200	7	GRIK3
ZNF536	0	6.45513	0.764	0.079	0	7	ZNF536	1.9556e-205	6.45513	0.764	0.079	1.17336e-201	7	ZNF536
FAM181B	0	6.44152	0.745	0.053	0	7	FAM181B	1.8655e-202	6.44152	0.745	0.053	1.1193e-198	7	FAM181B
ADGRB3	0	6.4302	0.658	0.068	0	7	ADGRB3	1.31914e-123	6.4302	0.658	0.068	7.91482e-120	7	ADGRB3
NCAM1	0	6.37991	0.583	0.098	0	7	NCAM1	1.05838e-36	6.37991	0.583	0.098	6.35029e-33	7	NCAM1
STK32A	0	6.3308	0.676	0.032	0	7	STK32A	2.01108e-210	6.3308	0.676	0.032	1.20665e-206	7	STK32A
SLC35F1	0	6.29337	0.775	0.041	0	7	SLC35F1	5.33156e-243	6.29337	0.775	0.041	3.19893e-239	7	SLC35F1
DLX1	0	6.21808	0.72	0.017	0	7	DLX1	0	6.21808	0.72	0.017	0	7	DLX1
SFRP5	0	6.17688	0.697	0.091	0	7	SFRP5	3.71143e-157	6.17688	0.697	0.091	2.22686e-153	7	SFRP5
SCN9A	0	6.11948	0.675	0.075	0	7	SCN9A	7.14442e-123	6.11948	0.675	0.075	4.28665e-119	7	SCN9A
LRRC4C	0	6.08884	0.758	0.076	0	7	LRRC4C	2.7267e-230	6.08884	0.758	0.076	1.63602e-226	7	LRRC4C
UG0898H09	0	6.06014	0.606	0.026	0	7	UG0898H09	2.17311e-134	6.06014	0.606	0.026	1.30387e-130	7	UG0898H09
TTYH1	0	6.0435	0.674	0.054	0	7	TTYH1	9.53737e-135	6.0435	0.674	0.054	5.72242e-131	7	TTYH1
SOX2	0	6.04014	0.542	0.055	0	7	SOX2	1.36834e-44	6.04014	0.542	0.055	8.21004e-41	7	SOX2
SLITRK2	0	6.01898	0.659	0.027	0	7	SLITRK2	1.17158e-145	6.01898	0.659	0.027	7.02946e-142	7	SLITRK2
LGALS3BP	0	6.0167	0.956	0.292	0	7	LGALS3BP	0	6.0167	0.956	0.292	0	7	LGALS3BP
LINC00461	0	5.9714	0.654	0.033	0	7	LINC00461	5.91738e-125	5.9714	0.654	0.033	3.55043e-121	7	LINC00461
RP11-308N19.1	0	5.94567	0.703	0.036	0	7	RP11-308N19.1	1.00849e-148	5.94567	0.703	0.036	6.05094e-145	7	RP11-308N19.1
MIA	0	5.93302	0.667	0.126	0	7	MIA	4.34744e-132	5.93302	0.667	0.126	2.60846e-128	7	MIA
MAL	0	5.85087	0.907	0.124	0	7	MAL	0	5.85087	0.907	0.124	0	7	MAL
SHC4	0	5.81865	0.758	0.069	0	7	SHC4	3.78314e-213	5.81865	0.758	0.069	2.26989e-209	7	SHC4
SMIM5	0	5.78724	0.847	0.074	0	7	SMIM5	0	5.78724	0.847	0.074	0	7	SMIM5
RXRG	0	5.7868	0.726	0.097	0	7	RXRG	2.0821e-163	5.7868	0.726	0.097	1.24926e-159	7	RXRG
RP11-174J11.1	0	5.75536	0.64	0.003	0	7	RP11-174J11.1	4.26518e-251	5.75536	0.64	0.003	2.55911e-247	7	RP11-174J11.1
SGCE1	0	5.75424	0.902	0.159	0	7	SGCE	0	5.75424	0.902	0.159	0	7	SGCE
PCDH10	0	5.74966	0.686	0.045	0	7	PCDH10	8.61303e-253	5.74966	0.686	0.045	5.16782e-249	7	PCDH10
KCNIP4	0	5.74938	0.74	0.028	0	7	KCNIP4	3.60684e-243	5.74938	0.74	0.028	2.1641e-239	7	KCNIP4
COL21A1	0	5.69882	0.802	0.089	0	7	COL21A1	1.57059e-262	5.69882	0.802	0.089	9.42355e-259	7	COL21A1
CDH2	0	5.68532	0.815	0.058	0	7	CDH2	0	5.68532	0.815	0.058	0	7	CDH2
TMEM132B	0	5.61776	0.664	0.041	0	7	TMEM132B	1.92728e-183	5.61776	0.664	0.041	1.15637e-179	7	TMEM132B
FRMD4A1	0	5.59189	0.849	0.148	0	7	FRMD4A	0	5.59189	0.849	0.148	0	7	FRMD4A
PCDH9	0	5.58996	0.86	0.122	0	7	PCDH9	0	5.58996	0.86	0.122	0	7	PCDH9
NCAM2	0	5.5685	0.602	0.089	0	7	NCAM2	1.01107e-140	5.5685	0.602	0.089	6.06644e-137	7	NCAM2
CLIC41	0	5.56715	0.919	0.274	0	7	CLIC4	0	5.56715	0.919	0.274	0	7	CLIC4
CERS1	0	5.55412	0.735	0.036	0	7	CERS1	0	5.55412	0.735	0.036	0	7	CERS1
GRIA1	0	5.52511	0.649	0.035	0	7	GRIA1	7.84063e-249	5.52511	0.649	0.035	4.70438e-245	7	GRIA1
SORBS1	0	5.49571	0.74	0.095	0	7	SORBS1	2.4705e-290	5.49571	0.74	0.095	1.4823e-286	7	SORBS1
GFRA2	0	5.43409	0.645	0.086	0	7	GFRA2	7.34669e-93	5.43409	0.645	0.086	4.40802e-89	7	GFRA2
OLFML2A	0	5.39611	0.829	0.119	0	7	OLFML2A	0	5.39611	0.829	0.119	0	7	OLFML2A
CTD-2325P2.4	0	5.39498	0.626	0.031	0	7	CTD-2325P2.4	9.23399e-203	5.39498	0.626	0.031	5.54039e-199	7	CTD-2325P2.4
CNTN2	0	5.39496	0.691	0.026	0	7	CNTN2	3.04652e-159	5.39496	0.691	0.026	1.82791e-155	7	CNTN2
AK5	0	5.39375	0.782	0.071	0	7	AK5	7.25446e-283	5.39375	0.782	0.071	4.35268e-279	7	AK5
RP1-155D22.2	0	5.38742	0.714	0.074	0	7	RP1-155D22.2	1.13585e-182	5.38742	0.714	0.074	6.81508e-179	7	RP1-155D22.2
MARCKS1	0	5.38276	0.957	0.312	0	7	MARCKS	0	5.38276	0.957	0.312	0	7	MARCKS
LRRTM1	0	5.34401	0.812	0.037	0	7	LRRTM1	5.93803e-297	5.34401	0.812	0.037	3.56282e-293	7	LRRTM1
TSPAN15	0	5.32635	0.836	0.169	0	7	TSPAN15	0	5.32635	0.836	0.169	0	7	TSPAN15
GFRA1	0	5.31262	0.568	0.084	0	7	GFRA1	7.52119e-93	5.31262	0.568	0.084	4.51271e-89	7	GFRA1
TUBB2B	0	5.30116	0.923	0.08	0	7	TUBB2B	0	5.30116	0.923	0.08	0	7	TUBB2B
CLU1	0	5.20653	0.994	0.163	0	7	CLU	0	5.20653	0.994	0.163	0	7	CLU
GAP43	0	5.19271	0.725	0.072	0	7	GAP43	0	5.19271	0.725	0.072	0	7	GAP43
RP11-809C18.3	0	5.15261	0.637	0.011	0	7	RP11-809C18.3	5.58101e-235	5.15261	0.637	0.011	3.3486e-231	7	RP11-809C18.3
GDNF-AS1	0	5.12103	0.717	0.029	0	7	GDNF-AS1	0	5.12103	0.717	0.029	0	7	GDNF-AS1
ACSBG1	0	5.06676	0.548	0.028	0	7	ACSBG1	3.36675e-120	5.06676	0.548	0.028	2.02005e-116	7	ACSBG1
ATP1A2	0	5.04128	0.707	0.075	0	7	ATP1A2	1.34677e-159	5.04128	0.707	0.075	8.08064e-156	7	ATP1A2
DHH	0	5.02464	0.742	0.034	0	7	DHH	1.74415e-231	5.02464	0.742	0.034	1.04649e-227	7	DHH
MATN2	0	4.99657	0.964	0.129	0	7	MATN2	0	4.99657	0.964	0.129	0	7	MATN2
ACSM5	0	4.9905	0.55	0.052	0	7	ACSM5	1.30984e-43	4.9905	0.55	0.052	7.85901e-40	7	ACSM5
PDLIM41	0	4.98523	0.906	0.201	0	7	PDLIM4	0	4.98523	0.906	0.201	0	7	PDLIM4
GRIK2	0	4.96958	0.629	0.029	0	7	GRIK2	5.08435e-212	4.96958	0.629	0.029	3.05061e-208	7	GRIK2
SEMA3B	0	4.93724	0.96	0.144	0	7	SEMA3B	0	4.93724	0.96	0.144	0	7	SEMA3B
OTOGL	0	4.92261	0.535	0.02	0	7	OTOGL	2.0903e-114	4.92261	0.535	0.02	1.25418e-110	7	OTOGL
SCRG1	0	4.8733	0.637	0.101	0	7	SCRG1	9.51315e-165	4.8733	0.637	0.101	5.70789e-161	7	SCRG1
CHL1	0	4.86436	0.836	0.077	0	7	CHL1	0	4.86436	0.836	0.077	0	7	CHL1
TUBA1A1	0	4.83078	0.996	0.36	0	7	TUBA1A	0	4.83078	0.996	0.36	0	7	TUBA1A
SCARA31	0	4.76676	0.779	0.108	0	7	SCARA3	0	4.76676	0.779	0.108	0	7	SCARA3
LRRTM4	0	4.76175	0.704	0.015	0	7	LRRTM4	0	4.76175	0.704	0.015	0	7	LRRTM4
ADARB2	0	4.70087	0.575	0.081	0	7	ADARB2	6.07431e-57	4.70087	0.575	0.081	3.64458e-53	7	ADARB2
LGI1	0	4.67719	0.728	0.048	0	7	LGI1	3.39148e-217	4.67719	0.728	0.048	2.03489e-213	7	LGI1
C9orf50	0	4.66665	0.658	0.034	0	7	C9orf50	4.75767e-256	4.66665	0.658	0.034	2.8546e-252	7	C9orf50
PDZD4	0	4.66399	0.67	0.058	0	7	PDZD4	2.30705e-156	4.66399	0.67	0.058	1.38423e-152	7	PDZD4
U91319.1	0	4.647	0.622	0.006	0	7	U91319.1	1.77323e-243	4.647	0.622	0.006	1.06394e-239	7	U91319.1
AC068831.10	0	4.63937	0.582	0.049	0	7	AC068831.10	1.11032e-148	4.63937	0.582	0.049	6.66194e-145	7	AC068831.10
AC009501.4	0	4.59446	0.602	0.103	0	7	AC009501.4	4.55361e-97	4.59446	0.602	0.103	2.73217e-93	7	AC009501.4
TMOD2	0	4.59037	0.823	0.119	0	7	TMOD2	0	4.59037	0.823	0.119	0	7	TMOD2
HPR	0	4.53408	0.517	0.029	0	7	HPR	1.28482e-96	4.53408	0.517	0.029	7.70894e-93	7	HPR
WNT6	0	4.46577	0.681	0.035	0	7	WNT6	2.55546e-245	4.46577	0.681	0.035	1.53328e-241	7	WNT6
WDR86	0	4.46413	0.71	0.11	0	7	WDR86	4.54189e-239	4.46413	0.71	0.11	2.72513e-235	7	WDR86
FGL21	0	4.46159	0.863	0.189	0	7	FGL2	3.15133e-267	4.46159	0.863	0.189	1.8908e-263	7	FGL2
RP11-472N13.3	0	4.44883	0.664	0.052	0	7	RP11-472N13.3	1.99072e-133	4.44883	0.664	0.052	1.19443e-129	7	RP11-472N13.3
SUSD4	0	4.39768	0.62	0.071	0	7	SUSD4	1.11877e-274	4.39768	0.62	0.071	6.71264e-271	7	SUSD4
FSTL31	0	4.2168	0.598	0.153	0	7	FSTL3	5.69402e-87	4.2168	0.598	0.153	3.41641e-83	7	FSTL3
TTLL7	0	4.16422	0.584	0.141	0	7	TTLL7	1.1653e-105	4.16422	0.584	0.141	6.9918e-102	7	TTLL7
UCHL1	0	4.15521	0.821	0.132	0	7	UCHL1	0	4.15521	0.821	0.132	0	7	UCHL1
GDNF	0	4.10984	0.71	0.064	0	7	GDNF	2.48949e-195	4.10984	0.71	0.064	1.4937e-191	7	GDNF
SV2B	0	4.10885	0.713	0.052	0	7	SV2B	0	4.10885	0.713	0.052	0	7	SV2B
LINC01268	0	4.0327	0.52	0.048	0	7	LINC01268	2.47307e-39	4.0327	0.52	0.048	1.48384e-35	7	LINC01268
RGS9	0	3.98557	0.681	0.118	0	7	RGS9	1.32936e-173	3.98557	0.681	0.118	7.97613e-170	7	RGS9
LINC00982	0	3.98105	0.623	0.038	0	7	LINC00982	7.66726e-144	3.98105	0.623	0.038	4.60036e-140	7	LINC00982
RP11-6O2.3	0	3.95956	0.606	0.046	0	7	RP11-6O2.3	5.00668e-122	3.95956	0.606	0.046	3.00401e-118	7	RP11-6O2.3
P2RY12	0	3.91772	0.617	0.071	0	7	P2RY12	2.45839e-214	3.91772	0.617	0.071	1.47503e-210	7	P2RY12
CTB-1144G6.6	0	3.91043	0.533	0.026	0	7	CTB-1144G6.6	4.2554e-115	3.91043	0.533	0.026	2.55324e-111	7	CTB-1144G6.6
BEX1	0	3.87526	0.761	0.116	0	7	BEX1	1.458e-206	3.87526	0.761	0.116	8.74802e-203	7	BEX1
LINC01436	0	3.82807	0.791	0.098	0	7	LINC01436	0	3.82807	0.791	0.098	0	7	LINC01436
SPX	0	3.82225	0.524	0.052	0	7	SPX	7.5662e-24	3.82225	0.524	0.052	4.53972e-20	7	SPX
KCNS31	0	3.80162	0.755	0.126	0	7	KCNS3	3.28848e-306	3.80162	0.755	0.126	1.97309e-302	7	KCNS3
INSC	0	3.75323	0.734	0.058	0	7	INSC	1.9669e-188	3.75323	0.734	0.058	1.18014e-184	7	INSC
RP11-629G13.1	0	3.72839	0.643	0.052	0	7	RP11-629G13.1	3.40894e-241	3.72839	0.643	0.052	2.04536e-237	7	RP11-629G13.1
ADAMTS8	0	3.71103	0.652	0.065	0	7	ADAMTS8	5.53724e-112	3.71103	0.652	0.065	3.32235e-108	7	ADAMTS8
RP11-230B22.1	0	3.68727	0.547	0.012	0	7	RP11-230B22.1	1.83335e-223	3.68727	0.547	0.012	1.10001e-219	7	RP11-230B22.1
RCAN11	0	3.62969	0.854	0.181	0	7	RCAN1	1.55535e-303	3.62969	0.854	0.181	9.33211e-300	7	RCAN1
PAPPA	0	3.61874	0.768	0.097	0	7	PAPPA	0	3.61874	0.768	0.097	0	7	PAPPA
CYR611	0	3.58329	0.963	0.202	0	7	CYR61	0	3.58329	0.963	0.202	0	7	CYR61
FGF21	0	3.54981	0.748	0.119	0	7	FGF2	9.9462e-307	3.54981	0.748	0.119	5.96772e-303	7	FGF2
CYP19A1	0	3.52082	0.623	0.032	0	7	CYP19A1	3.28421e-295	3.52082	0.623	0.032	1.97053e-291	7	CYP19A1
HES12	0	3.51753	0.845	0.243	0	7	HES1	5.25912e-257	3.51753	0.845	0.243	3.15547e-253	7	HES1
RELN	0	3.50421	0.748	0.045	0	7	RELN	1.0301e-305	3.50421	0.748	0.045	6.18058e-302	7	RELN
CAB39L	0	3.4982	0.771	0.119	0	7	CAB39L	2.61526e-272	3.4982	0.771	0.119	1.56916e-268	7	CAB39L
TMEM176B1	0	3.4408	0.979	0.285	0	7	TMEM176B	0	3.4408	0.979	0.285	0	7	TMEM176B
RP11-236B18.5	0	3.29809	0.545	0.015	0	7	RP11-236B18.5	1.46562e-131	3.29809	0.545	0.015	8.7937e-128	7	RP11-236B18.5
DST	0	3.26072	0.941	0.245	0	7	DST	0	3.26072	0.941	0.245	0	7	DST
RP4-718J7.4	0	3.09819	0.693	0.019	0	7	RP4-718J7.4	0	3.09819	0.693	0.019	0	7	RP4-718J7.4
SLITRK5	0	3.0845	0.645	0.035	0	7	SLITRK5	3.37469e-245	3.0845	0.645	0.035	2.02481e-241	7	SLITRK5
TMEM178A	0	3.00563	0.758	0.062	0	7	TMEM178A	0	3.00563	0.758	0.062	0	7	TMEM178A
ABI3BP1	0	2.97385	0.751	0.121	0	7	ABI3BP	1.9638e-233	2.97385	0.751	0.121	1.17828e-229	7	ABI3BP
MAP1B2	0	2.95258	0.898	0.147	0	7	MAP1B	0	2.95258	0.898	0.147	0	7	MAP1B
FIBIN1	0	2.92823	0.849	0.121	0	7	FIBIN	0	2.92823	0.849	0.121	0	7	FIBIN
TMEM155	0	2.89404	0.714	0.089	0	7	TMEM155	6.40355e-178	2.89404	0.714	0.089	3.84213e-174	7	TMEM155
CTNND2	0	2.82479	0.6	0.071	0	7	CTNND2	1.56626e-72	2.82479	0.6	0.071	9.39754e-69	7	CTNND2
C8orf46	0	2.82084	0.665	0.089	0	7	C8orf46	8.06735e-141	2.82084	0.665	0.089	4.84041e-137	7	C8orf46
SORBS2	0	2.76852	0.915	0.119	0	7	SORBS2	0	2.76852	0.915	0.119	0	7	SORBS2
USP44	0	2.74986	0.687	0.085	0	7	USP44	4.33417e-158	2.74986	0.687	0.085	2.6005e-154	7	USP44
APP1	0	2.74838	0.945	0.31	0	7	APP	0	2.74838	0.945	0.31	0	7	APP
JAKMIP2	0	2.7443	0.723	0.101	0	7	JAKMIP2	3.04215e-169	2.7443	0.723	0.101	1.82529e-165	7	JAKMIP2
IL1RAPL1	0	2.73983	0.59	0.064	0	7	IL1RAPL1	1.29732e-77	2.73983	0.59	0.064	7.78391e-74	7	IL1RAPL1
ZBTB201	0	2.65267	0.85	0.248	0	7	ZBTB20	6.01331e-240	2.65267	0.85	0.248	3.60798e-236	7	ZBTB20
NRIP2	0	2.6497	0.642	0.079	0	7	NRIP2	7.81088e-105	2.6497	0.642	0.079	4.68653e-101	7	NRIP2
APC2	0	2.63244	0.545	0.02	0	7	APC2	3.80709e-142	2.63244	0.545	0.02	2.28426e-138	7	APC2
HCG23	0	2.47487	0.552	0.04	0	7	HCG23	6.68738e-252	2.47487	0.552	0.04	4.01243e-248	7	HCG23
RGS162	0	2.47109	0.926	0.221	0	7	RGS16	0	2.47109	0.926	0.221	0	7	RGS16
COL9A3	0	2.4443	0.546	0.122	0	7	COL9A3	5.86256e-39	2.4443	0.546	0.122	3.51754e-35	7	COL9A3
SLITRK6	0	2.43247	0.783	0.072	0	7	SLITRK6	3.20247e-241	2.43247	0.783	0.072	1.92148e-237	7	SLITRK6
COL8A11	0	2.38231	0.907	0.153	0	7	COL8A1	0	2.38231	0.907	0.153	0	7	COL8A1
FST1	0	2.29833	0.828	0.122	0	7	FST	0	2.29833	0.828	0.122	0	7	FST
PDK4	0	2.29518	0.829	0.149	0	7	PDK4	1.34929e-279	2.29518	0.829	0.149	8.09573e-276	7	PDK4
ZRSR1	0	2.28426	0.652	0.04	0	7	ZRSR1	0	2.28426	0.652	0.04	0	7	ZRSR1
OVOS2	0	2.18565	0.644	0.08	0	7	OVOS2	9.21339e-226	2.18565	0.644	0.08	5.52803e-222	7	OVOS2
WISP2	0	2.1486	0.833	0.094	0	7	WISP2	0	2.1486	0.833	0.094	0	7	WISP2
EGR11	0	2.06657	0.955	0.293	0	7	EGR1	0	2.06657	0.955	0.293	0	7	EGR1
KCNIP1	0	2.04421	0.654	0.043	0	7	KCNIP1	2.18617e-259	2.04421	0.654	0.043	1.3117e-255	7	KCNIP1
LCMT1-AS1	0	2.03539	0.64	0.069	0	7	LCMT1-AS1	1.0213e-190	2.03539	0.64	0.069	6.12778e-187	7	LCMT1-AS1
SLN	0	1.99397	0.683	0.06	0	7	SLN	0	1.99397	0.683	0.06	0	7	SLN
AIRE	0	1.98639	0.508	0.021	0	7	AIRE	6.7056e-167	1.98639	0.508	0.021	4.02336e-163	7	AIRE
DAAM2	0	1.91855	0.76	0.087	0	7	DAAM2	1.47802e-277	1.91855	0.76	0.087	8.86809e-274	7	DAAM2
HSPB21	0	1.89695	0.811	0.133	0	7	HSPB2	0	1.89695	0.811	0.133	0	7	HSPB2
RP11-728K20.3	0	1.84271	0.704	0.026	0	7	RP11-728K20.3	0	1.84271	0.704	0.026	0	7	RP11-728K20.3
ERBB31	0	1.8365	0.642	0.132	0	7	ERBB3	2.10077e-104	1.8365	0.642	0.132	1.26046e-100	7	ERBB3
GAS71	0	1.82768	0.887	0.164	0	7	GAS7	0	1.82768	0.887	0.164	0	7	GAS7
RP11-309M23.1	0	1.80295	0.693	0.081	0	7	RP11-309M23.1	2.4834e-227	1.80295	0.693	0.081	1.49004e-223	7	RP11-309M23.1
CLEC4F	0	1.79782	0.701	0.029	0	7	CLEC4F	0	1.79782	0.701	0.029	0	7	CLEC4F
2020-11-01	0	1.77304	0.617	0.098	0	7	NOV	1.83605e-130	1.77304	0.617	0.098	1.10163e-126	7	NOV
FGFBP2	0	1.75839	0.703	0.093	0	7	FGFBP2	4.26406e-166	1.75839	0.703	0.093	2.55843e-162	7	FGFBP2
LINC00548	0	1.72786	0.539	0.031	0	7	LINC00548	9.53036e-102	1.72786	0.539	0.031	5.71822e-98	7	LINC00548
TIMP32	0	1.44305	0.961	0.212	0	7	TIMP3	0	1.44305	0.961	0.212	0	7	TIMP3
RPL34-AS1	0	1.34149	0.583	0.062	0	7	RPL34-AS1	1.05363e-220	1.34149	0.583	0.062	6.32176e-217	7	RPL34-AS1
PCDHB2	1.19301645e-315	4.58414	0.585	0.093	7.158098708517e-312	7	PCDHB2	1.47272e-134	4.58414	0.585	0.093	8.83633e-131	7	PCDHB2
RP3-466P17.1	1.709836795e-315	2.86711	0.523	0.049	1.025902076716e-311	7	RP3-466P17.1	1.3173e-152	2.86711	0.523	0.049	7.90377e-149	7	RP3-466P17.1
ADAMTSL1	5.23012058715e-312	5.02142	0.58	0.083	3.13807e-308	7	ADAMTSL1	2.95978e-100	5.02142	0.58	0.083	1.77587e-96	7	ADAMTSL1
RASD1	7.380465420121e-311	1.97006	0.784	0.175	4.42828e-307	7	RASD1	9.1255e-277	1.97006	0.784	0.175	5.4753e-273	7	RASD1
SERPING11	8.53783e-307	3.99041	0.853	0.246	5.1227e-303	7	SERPING1	3.74656e-209	3.99041	0.853	0.246	2.24794e-205	7	SERPING1
EGFLAM	9.56552e-307	2.45089	0.568	0.067	5.73931e-303	7	EGFLAM	4.1621e-149	2.45089	0.568	0.067	2.49726e-145	7	EGFLAM
FLRT3	1.52391e-306	5.77154	0.523	0.068	9.14349e-303	7	FLRT3	1.08066e-85	5.77154	0.523	0.068	6.48398e-82	7	FLRT3
PPP1R12B	1.9798e-305	1.36375	0.751	0.159	1.18788e-301	7	PPP1R12B	3.48649e-200	1.36375	0.751	0.159	2.09189e-196	7	PPP1R12B
TRIM9	1.14433e-302	4.24317	0.524	0.059	6.86596e-299	7	TRIM9	7.63152e-99	4.24317	0.524	0.059	4.57891e-95	7	TRIM9
PHLDB11	3.78851e-301	1.81824	0.735	0.199	2.27311e-297	7	PHLDB1	1.68345e-166	1.81824	0.735	0.199	1.01007e-162	7	PHLDB1
MAMDC2	1.53139e-298	2.5539	0.633	0.11	9.18832e-295	7	MAMDC2	1.19681e-130	2.5539	0.633	0.11	7.18089e-127	7	MAMDC2
BAALC1	6.59218e-292	2.49581	0.601	0.086	3.95531e-288	7	BAALC	4.00813e-113	2.49581	0.601	0.086	2.40488e-109	7	BAALC
TEPP	1.28026e-289	1.85551	0.534	0.063	7.68156e-286	7	TEPP	2.64669e-94	1.85551	0.534	0.063	1.58802e-90	7	TEPP
PTK2	2.59378e-287	4.34571	0.758	0.193	1.55627e-283	7	PTK2	9.12263e-221	4.34571	0.758	0.193	5.47358e-217	7	PTK2
PTPRS	4.66912e-283	2.34693	0.726	0.157	2.80147e-279	7	PTPRS	9.29784e-218	2.34693	0.726	0.157	5.5787e-214	7	PTPRS
NFIC1	5.25602e-277	1.59431	0.87	0.276	3.15361e-273	7	NFIC	1.10748e-223	1.59431	0.87	0.276	6.64488e-220	7	NFIC
SSBP21	5.34349e-272	2.94396	0.773	0.208	3.20609e-268	7	SSBP2	8.09821e-205	2.94396	0.773	0.208	4.85893e-201	7	SSBP2
LINC01229	2.37894e-265	1.72977	0.589	0.096	1.42737e-261	7	LINC01229	2.72755e-163	1.72977	0.589	0.096	1.63653e-159	7	LINC01229
AC079630.4	1.50141e-264	3.37108	0.558	0.08	9.00847e-261	7	AC079630.4	7.1731e-179	3.37108	0.558	0.08	4.30386e-175	7	AC079630.4
RP11-798M19.6	2.83169e-262	2.93266	0.639	0.133	1.69901e-258	7	RP11-798M19.6	1.31521e-153	2.93266	0.639	0.133	7.89126e-150	7	RP11-798M19.6
QKI1	7.38804e-261	3.47253	0.771	0.238	4.43282e-257	7	QKI	2.02712e-151	3.47253	0.771	0.238	1.21627e-147	7	QKI
APOA1	6.23685e-260	2.3037	0.557	0.091	3.74211e-256	7	APOA1	2.76274e-89	2.3037	0.557	0.091	1.65764e-85	7	APOA1
NEFM	4.40847e-259	1.84787	0.54	0.075	2.64508e-255	7	NEFM	6.77007e-232	1.84787	0.54	0.075	4.06204e-228	7	NEFM
MAPRE2	1.60238e-255	8.8456	0.631	0.233	9.61429e-252	7	MAPRE2	1.11394e-102	8.8456	0.631	0.233	6.68362e-99	7	MAPRE2
ACSL6	1.85346e-254	1.82798	0.512	0.071	1.11208e-250	7	ACSL6	7.05218e-204	1.82798	0.512	0.071	4.23131e-200	7	ACSL6
TCEAL71	1.2985e-250	3.27898	0.655	0.136	7.79101e-247	7	TCEAL7	1.31507e-152	3.27898	0.655	0.136	7.89045e-149	7	TCEAL7
RALGPS2	1.76846e-249	5.94175	0.563	0.142	1.06108e-245	7	RALGPS2	2.79369e-112	5.94175	0.563	0.142	1.67622e-108	7	RALGPS2
SRGAP2B	6.31087e-247	3.23032	0.707	0.17	3.78652e-243	7	SRGAP2B	4.87719e-176	3.23032	0.707	0.17	2.92631e-172	7	SRGAP2B
WDFY2	3.68461e-244	11.5622	0.709	0.175	2.21076e-240	7	WDFY2	5.94656e-159	11.5622	0.709	0.175	3.56794e-155	7	WDFY2
HSPB3	6.46892e-244	2.29413	0.736	0.202	3.88135e-240	7	HSPB3	1.40907e-275	2.29413	0.736	0.202	8.45444e-272	7	HSPB3
ABL21	7.45563e-242	2.27936	0.81	0.251	4.47338e-238	7	ABL2	1.11929e-177	2.27936	0.81	0.251	6.71572e-174	7	ABL2
SRGAP2C	5.62878e-240	1.10312	0.702	0.176	3.37727e-236	7	SRGAP2C	5.98737e-131	1.10312	0.702	0.176	3.59242e-127	7	SRGAP2C
RBMS3-AS3	4.37756e-238	4.98155	0.521	0.078	2.62653e-234	7	RBMS3-AS3	3.81448e-86	4.98155	0.521	0.078	2.28869e-82	7	RBMS3-AS3
HIST1H1A	2.76471e-236	1.73146	0.712	0.183	1.65883e-232	7	HIST1H1A	6.20702e-260	1.73146	0.712	0.183	3.72421e-256	7	HIST1H1A
CNTN1	3.79421e-234	3.20966	0.514	0.076	2.27652e-230	7	CNTN1	3.17812e-121	3.20966	0.514	0.076	1.90687e-117	7	CNTN1
DLX5	6.79064e-233	2.31797	0.537	0.088	4.07439e-229	7	DLX5	5.64896e-113	2.31797	0.537	0.088	3.38938e-109	7	DLX5
PPP2R2B	1.12258e-232	8.60454	0.598	0.138	6.73547e-229	7	PPP2R2B	1.6429e-75	8.60454	0.598	0.138	9.85739e-72	7	PPP2R2B
USP51	6.49878e-229	3.77404	0.659	0.152	3.89927e-225	7	USP51	7.30493e-173	3.77404	0.659	0.152	4.38296e-169	7	USP51
WDR17	4.19425e-227	2.03525	0.514	0.079	2.51655e-223	7	WDR17	2.72336e-62	2.03525	0.514	0.079	1.63402e-58	7	WDR17
DSEL1	1.37542e-222	5.48266	0.66	0.158	8.25252e-219	7	DSEL	7.11754e-198	5.48266	0.66	0.158	4.27053e-194	7	DSEL
IFIT31	5.04731e-221	1.84599	0.655	0.156	3.02838e-217	7	IFIT3	1.45153e-123	1.84599	0.655	0.156	8.7092e-120	7	IFIT3
KCNMA1	8.70072e-219	3.69667	0.517	0.087	5.22043e-215	7	KCNMA1	4.49971e-41	3.69667	0.517	0.087	2.69982e-37	7	KCNMA1
MDK1	1.17892e-217	2.56731	0.758	0.236	7.07351e-214	7	MDK	3.84325e-179	2.56731	0.758	0.236	2.30595e-175	7	MDK
ALCAM	2.47694e-217	2.19322	0.587	0.161	1.48616e-213	7	ALCAM	1.21912e-81	2.19322	0.587	0.161	7.31474e-78	7	ALCAM
MYEF2	3.08294e-216	2.68655	0.568	0.112	1.84976e-212	7	MYEF2	4.05564e-139	2.68655	0.568	0.112	2.43338e-135	7	MYEF2
IFIT11	6.84204e-216	1.95973	0.647	0.155	4.10522e-212	7	IFIT1	3.76456e-167	1.95973	0.647	0.155	2.25873e-163	7	IFIT1
IGHV3-74	3.17508e-213	1.93317	0.621	0.142	1.90505e-209	7	IGHV3-74	1.32463e-244	1.93317	0.621	0.142	7.94777e-241	7	IGHV3-74
RIMS1	9.9091e-203	2.56246	0.637	0.161	5.94546e-199	7	RIMS1	7.13646e-247	2.56246	0.637	0.161	4.28187e-243	7	RIMS1
ATP6V0E2	3.18888e-198	3.92359	0.633	0.16	1.91333e-194	7	ATP6V0E2	1.4506e-113	3.92359	0.633	0.16	8.70358e-110	7	ATP6V0E2
SYT11	3.06053e-197	2.05609	0.546	0.167	1.83632e-193	7	SYT11	4.74913e-55	2.05609	0.546	0.167	2.84948e-51	7	SYT11
MAFF	6.09982e-197	12.9806	0.823	0.315	3.65989e-193	7	MAFF	1.63628e-117	12.9806	0.823	0.315	9.81768e-114	7	MAFF
MTRNR2L10	1.08772e-193	6.56734	0.572	0.128	6.52634e-190	7	MTRNR2L10	7.0634e-212	6.56734	0.572	0.128	4.23804e-208	7	MTRNR2L10
BCHE	2.33341e-180	2.73892	0.509	0.105	1.40005e-176	7	BCHE	9.88846e-76	2.73892	0.509	0.105	5.93308e-72	7	BCHE
ZSWIM4	1.23011e-173	1.09149	0.625	0.178	7.38064e-170	7	ZSWIM4	5.14348e-177	1.09149	0.625	0.178	3.08609e-173	7	ZSWIM4
NFATC1	2.31784e-170	4.88558	0.687	0.242	1.3907e-166	7	NFATC1	4.02328e-99	4.88558	0.687	0.242	2.41397e-95	7	NFATC1
ARC1	1.20557e-168	1.31906	0.577	0.161	7.23343e-165	7	ARC	1.37148e-153	1.31906	0.577	0.161	8.22888e-150	7	ARC
PFKFB31	5.86002e-160	3.1214	0.717	0.274	3.51601e-156	7	PFKFB3	1.57164e-80	3.1214	0.717	0.274	9.42985e-77	7	PFKFB3
SERPINE21	1.21557e-150	1.58595	0.61	0.196	7.29343e-147	7	SERPINE2	9.02718e-143	1.58595	0.61	0.196	5.41631e-139	7	SERPINE2
APBB1	1.13279e-148	2.22766	0.553	0.157	6.79673e-145	7	APBB1	1.86371e-68	2.22766	0.553	0.157	1.11823e-64	7	APBB1
LIX1L	2.64723e-132	1.56563	0.589	0.215	1.58834e-128	7	LIX1L	3.55351e-76	1.56563	0.589	0.215	2.13211e-72	7	LIX1L
FAM53C	9.0296e-58	9.21108	0.515	0.25	5.41776e-54	7	FAM53C	1.56534e-62	9.21108	0.515	0.25	9.39203e-59	7	FAM53C
C1orf186	0	20.1612	0.978	0.079	0	8	C1orf186	9.26849e-265	20.1612	0.978	0.079	5.5611e-261	8	C1orf186	Mast cells
SLC45A3	0	15.3629	0.586	0.08	0	8	SLC45A3	6.90717e-26	15.3629	0.586	0.08	4.1443e-22	8	SLC45A3
VWA5A	0	12.3452	0.804	0.159	0	8	VWA5A	2.29982e-113	12.3452	0.804	0.159	1.37989e-109	8	VWA5A
FLJ21408	0	12.0566	0.713	0.067	0	8	FLJ21408	1.34369e-98	12.0566	0.713	0.067	8.06212e-95	8	FLJ21408
CPA3	0	9.33813	1	0.105	0	8	CPA3	3.11244e-273	9.33813	1	0.105	1.86746e-269	8	CPA3
TPSB2	0	8.74109	1	0.129	0	8	TPSB2	3.61225e-273	8.74109	1	0.129	2.16735e-269	8	TPSB2
GATA2	0	8.35516	0.981	0.072	0	8	GATA2	3.40383e-262	8.35516	0.981	0.072	2.0423e-258	8	GATA2
MS4A2	0	8.27363	0.974	0.106	0	8	MS4A2	7.5926e-255	8.27363	0.974	0.106	4.55556e-251	8	MS4A2
TPSAB1	0	8.23191	1	0.116	0	8	TPSAB1	4.32091e-273	8.23191	1	0.116	2.59255e-269	8	TPSAB1
HPGDS	0	7.79103	0.988	0.085	0	8	HPGDS	1.04548e-262	7.79103	0.988	0.085	6.27286e-259	8	HPGDS
SLC18A2	0	7.7174	0.969	0.11	0	8	SLC18A2	3.73768e-248	7.7174	0.969	0.11	2.24261e-244	8	SLC18A2
GPR65	0	6.75217	0.957	0.2	0	8	GPR65	2.38999e-213	6.75217	0.957	0.2	1.434e-209	8	GPR65
RP11-354E11.2	0	6.6899	0.909	0.096	0	8	RP11-354E11.2	4.86016e-201	6.6899	0.909	0.096	2.9161e-197	8	RP11-354E11.2
HDC	0	6.62255	0.928	0.088	0	8	HDC	4.07511e-216	6.62255	0.928	0.088	2.44506e-212	8	HDC
CTSG	0	6.50721	0.658	0.072	0	8	CTSG	3.63631e-40	6.50721	0.658	0.072	2.18179e-36	8	CTSG
GCSAML	0	6.49164	0.818	0.092	0	8	GCSAML	3.61815e-128	6.49164	0.818	0.092	2.17089e-124	8	GCSAML
ADCYAP1	0	6.41848	0.734	0.068	0	8	ADCYAP1	2.38802e-111	6.41848	0.734	0.068	1.43281e-107	8	ADCYAP1
LTC4S	0	6.32168	0.933	0.118	0	8	LTC4S	1.47237e-223	6.32168	0.933	0.118	8.83421e-220	8	LTC4S
KRT1	0	6.24281	0.529	0.135	0	8	KRT1	1.59546e-05	6.24281	0.529	0.135	0.0957279	8	KRT1
XXbac-BPG13B8.10	0	6.20064	0.639	0.142	0	8	XXbac-BPG13B8.10	2.19015e-34	6.20064	0.639	0.142	1.31409e-30	8	XXbac-BPG13B8.10
CMA1	0	6.19898	0.785	0.062	0	8	CMA1	4.30805e-118	6.19898	0.785	0.062	2.58483e-114	8	CMA1
AC004791.2	0	6.1969	0.541	0.091	0	8	AC004791.2	5.58813e-12	6.1969	0.541	0.091	3.35288e-08	8	AC004791.2
KIT	0	6.16524	0.907	0.077	0	8	KIT	8.48329e-202	6.16524	0.907	0.077	5.08997e-198	8	KIT
SVOPL	0	5.85243	0.634	0.061	0	8	SVOPL	5.06799e-36	5.85243	0.634	0.061	3.0408e-32	8	SVOPL
TPSD1	0	5.601	0.634	0.081	0	8	TPSD1	3.42524e-38	5.601	0.634	0.081	2.05515e-34	8	TPSD1
AC020571.3	0	5.54517	0.866	0.131	0	8	AC020571.3	5.61879e-159	5.54517	0.866	0.131	3.37127e-155	8	AC020571.3
MAOB	0	4.96352	0.89	0.105	0	8	MAOB	7.6153e-202	4.96352	0.89	0.105	4.56918e-198	8	MAOB
IL1RL1	0	4.88374	0.914	0.072	0	8	IL1RL1	9.7852e-217	4.88374	0.914	0.072	5.87112e-213	8	IL1RL1
SIGLEC8	0	4.73434	0.861	0.045	0	8	SIGLEC8	8.19356e-178	4.73434	0.861	0.045	4.91614e-174	8	SIGLEC8
GLUL1	0	4.72244	0.986	0.246	0	8	GLUL	1.39294e-225	4.72244	0.986	0.246	8.35764e-222	8	GLUL
RAB44	0	4.55334	0.821	0.02	0	8	RAB44	8.80052e-201	4.55334	0.821	0.02	5.28031e-197	8	RAB44
IL1RAPL11	0	4.48879	0.866	0.065	0	8	IL1RAPL1	1.75259e-190	4.48879	0.866	0.065	1.05155e-186	8	IL1RAPL1
CDK15	0	4.43529	0.555	0.087	0	8	CDK15	1.02219e-27	4.43529	0.555	0.087	6.13316e-24	8	CDK15
BIRC3	0	4.34327	0.967	0.306	0	8	BIRC3	2.02757e-219	4.34327	0.967	0.306	1.21654e-215	8	BIRC3
IL13	0	4.32669	0.883	0.09	0	8	IL13	5.26984e-218	4.32669	0.883	0.09	3.16191e-214	8	IL13
HPGD	0	4.30484	0.653	0.157	0	8	HPGD	8.38032e-41	4.30484	0.653	0.157	5.02819e-37	8	HPGD
ST8SIA6	0	4.2329	0.746	0.028	0	8	ST8SIA6	2.45377e-138	4.2329	0.746	0.028	1.47226e-134	8	ST8SIA6
RP11-384P7.7	0	4.01666	0.804	0.056	0	8	RP11-384P7.7	9.09621e-158	4.01666	0.804	0.056	5.45773e-154	8	RP11-384P7.7
RP11-557H15.4	0	3.99277	0.727	0.056	0	8	RP11-557H15.4	3.28613e-86	3.99277	0.727	0.056	1.97168e-82	8	RP11-557H15.4
RP11-542K23.7	0	3.97868	0.84	0.075	0	8	RP11-542K23.7	6.22967e-160	3.97868	0.84	0.075	3.7378e-156	8	RP11-542K23.7
TENM2	0	3.85885	0.828	0.055	0	8	TENM2	4.56334e-210	3.85885	0.828	0.055	2.738e-206	8	TENM2
MITF1	0	3.78167	0.923	0.156	0	8	MITF	2.04127e-222	3.78167	0.923	0.156	1.22476e-218	8	MITF
LGALS12	0	3.68355	0.794	0.045	0	8	LGALS12	2.10982e-157	3.68355	0.794	0.045	1.26589e-153	8	LGALS12
NTRK1	0	3.50853	0.811	0.106	0	8	NTRK1	4.75255e-137	3.50853	0.811	0.106	2.85153e-133	8	NTRK1
DUSP62	0	3.32145	0.919	0.218	0	8	DUSP6	7.94321e-196	3.32145	0.919	0.218	4.76593e-192	8	DUSP6
ANXA1	0	3.22122	0.964	0.332	0	8	ANXA1	2.08393e-212	3.22122	0.964	0.332	1.25036e-208	8	ANXA1
RP11-809C18.31	0	3.14108	0.603	0.014	0	8	RP11-809C18.3	4.14458e-57	3.14108	0.603	0.014	2.48675e-53	8	RP11-809C18.3
AC008440.5	0	3.02555	0.844	0.033	0	8	AC008440.5	5.99225e-212	3.02555	0.844	0.033	3.59535e-208	8	AC008440.5
CRLF2	0	2.75129	0.854	0.059	0	8	CRLF2	1.39479e-195	2.75129	0.854	0.059	8.36873e-192	8	CRLF2
RP11-84A19.2	0	2.63997	0.833	0.036	0	8	RP11-84A19.2	3.03179e-188	2.63997	0.833	0.036	1.81907e-184	8	RP11-84A19.2
RP11-338K17.8	0	2.50391	0.813	0.033	0	8	RP11-338K17.8	1.34794e-159	2.50391	0.813	0.033	8.08761e-156	8	RP11-338K17.8
RP11-145G20.1	0	2.49159	0.751	0.039	0	8	RP11-145G20.1	6.41065e-186	2.49159	0.751	0.039	3.84639e-182	8	RP11-145G20.1
RP4-591N18.2	0	2.37849	0.744	0.041	0	8	RP4-591N18.2	1.1981e-104	2.37849	0.744	0.041	7.18861e-101	8	RP4-591N18.2
PVALB	0	2.04195	0.873	0.091	0	8	PVALB	5.29241e-181	2.04195	0.873	0.091	3.17545e-177	8	PVALB
LMNA1	0	2.03578	0.998	0.384	0	8	LMNA	9.66283e-267	2.03578	0.998	0.384	5.7977e-263	8	LMNA
ACSL4	0	2.00563	0.852	0.18	0	8	ACSL4	8.39628e-154	2.00563	0.852	0.18	5.03777e-150	8	ACSL4
GPR42	0	1.93083	0.856	0.062	0	8	GPR42	3.88517e-164	1.93083	0.856	0.062	2.3311e-160	8	GPR42
FFAR3	1e-323	2.5339	0.856	0.078	5.929e-320	8	FFAR3	9.21675e-181	2.5339	0.856	0.078	5.53005e-177	8	FFAR3
SIGLEC6	1.9819e-319	4.25257	0.581	0.041	1.18913696e-315	8	SIGLEC6	8.05616e-29	4.25257	0.581	0.041	4.8337e-25	8	SIGLEC6
NELL1	5.9759004e-317	2.72994	0.66	0.026	3.58554022073e-313	8	NELL1	4.38087e-115	2.72994	0.66	0.026	2.62852e-111	8	NELL1
TAL1	5.005078133601e-310	3.55658	0.699	0.042	3.00305e-306	8	TAL1	5.62504e-67	3.55658	0.699	0.042	3.37503e-63	8	TAL1
RGS13	4.69081e-304	1.82775	0.603	0.13	2.81449e-300	8	RGS13	1.42641e-19	1.82775	0.603	0.13	8.55844e-16	8	RGS13
CADPS	8.44967e-302	4.5971	0.579	0.07	5.0698e-298	8	CADPS	4.34023e-32	4.5971	0.579	0.07	2.60414e-28	8	CADPS
C6orf25	3.36615e-298	2.68318	0.581	0.018	2.01969e-294	8	C6orf25	1.1013e-44	2.68318	0.581	0.018	6.60778e-41	8	C6orf25
RP11-818O24.3	1.04988e-293	1.92788	0.727	0.048	6.2993e-290	8	RP11-818O24.3	2.92286e-128	1.92788	0.727	0.048	1.75372e-124	8	RP11-818O24.3
CTD-2562J15.4	1.71554e-293	2.01227	0.718	0.046	1.02932e-289	8	CTD-2562J15.4	3.45576e-130	2.01227	0.718	0.046	2.07345e-126	8	CTD-2562J15.4
TMEM2331	2.25266e-288	4.62006	0.629	0.072	1.3516e-284	8	TMEM233	1.31759e-51	4.62006	0.629	0.072	7.90555e-48	8	TMEM233
SEMA4A	9.50831e-287	6.52418	0.878	0.235	5.70499e-283	8	SEMA4A	1.15261e-173	6.52418	0.878	0.235	6.91566e-170	8	SEMA4A
COL13A1	2.45102e-285	4.52438	0.871	0.107	1.47061e-281	8	COL13A1	5.39353e-204	4.52438	0.871	0.107	3.23612e-200	8	COL13A1
FCER1A	1.16069e-282	2.52634	0.677	0.045	6.96415e-279	8	FCER1A	1.25414e-58	2.52634	0.677	0.045	7.52482e-55	8	FCER1A
ADGRE21	4.65604e-282	3.30777	0.878	0.121	2.79362e-278	8	ADGRE2	1.2289e-163	3.30777	0.878	0.121	7.37337e-160	8	ADGRE2
IL4	1.05628e-266	1.88038	0.703	0.052	6.33767e-263	8	IL4	3.63382e-118	1.88038	0.703	0.052	2.18029e-114	8	IL4
UTS2	4.38692e-266	12.9369	0.823	0.142	2.63215e-262	8	UTS2	1.52674e-141	12.9369	0.823	0.142	9.16043e-138	8	UTS2
TUBA1A2	1.65135e-265	2.35976	0.919	0.363	9.90807e-262	8	TUBA1A	6.84223e-168	2.35976	0.919	0.363	4.10534e-164	8	TUBA1A
MYO16	8.85839e-265	3.42968	0.722	0.059	5.31503e-261	8	MYO16	2.44347e-104	3.42968	0.722	0.059	1.46608e-100	8	MYO16
CD691	6.7586e-260	2.80012	0.742	0.268	4.05516e-256	8	CD69	1.33889e-90	2.80012	0.742	0.268	8.03332e-87	8	CD69
CMTM2	2.06218e-256	2.32916	0.66	0.045	1.23731e-252	8	CMTM2	2.25256e-143	2.32916	0.66	0.045	1.35154e-139	8	CMTM2
ARHGEF6	2.55358e-252	11.2063	0.703	0.184	1.53215e-248	8	ARHGEF6	1.12078e-64	11.2063	0.703	0.184	6.72468e-61	8	ARHGEF6
BCAN	4.79274e-251	2.52005	0.737	0.087	2.87565e-247	8	BCAN	3.46485e-125	2.52005	0.737	0.087	2.07891e-121	8	BCAN
ELL2	1.99419e-249	11.5318	0.931	0.267	1.19651e-245	8	ELL2	5.82595e-164	11.5318	0.931	0.267	3.49557e-160	8	ELL2
AHR	5.62444e-247	14.3592	0.902	0.249	3.37466e-243	8	AHR	5.45686e-153	14.3592	0.902	0.249	3.27412e-149	8	AHR
CNRIP1	1.73016e-230	7.311	0.756	0.197	1.0381e-226	8	CNRIP1	1.63145e-96	7.311	0.756	0.197	9.78872e-93	8	CNRIP1
AC010287.1	3.00779e-209	4.32173	0.789	0.133	1.80468e-205	8	AC010287.1	7.8834e-121	4.32173	0.789	0.133	4.73004e-117	8	AC010287.1
MIR3681HG	6.11559e-208	2.71217	0.639	0.062	3.66935e-204	8	MIR3681HG	1.38956e-51	2.71217	0.639	0.062	8.33733e-48	8	MIR3681HG
C1orf228	2.18853e-199	4.86075	0.658	0.128	1.31312e-195	8	C1orf228	4.70538e-55	4.86075	0.658	0.128	2.82323e-51	8	C1orf228
WDR171	1.22175e-198	2.70507	0.675	0.08	7.3305e-195	8	WDR17	1.22839e-71	2.70507	0.675	0.08	7.37035e-68	8	WDR17
RAB37	2.15624e-198	4.1376	0.754	0.143	1.29374e-194	8	RAB37	1.00864e-109	4.1376	0.754	0.143	6.05184e-106	8	RAB37
GACAT2	2.36106e-197	3.96382	0.517	0.033	1.41664e-193	8	GACAT2	1.50131e-168	3.96382	0.517	0.033	9.00787e-165	8	GACAT2
CTD-3110H11.1	3.33142e-185	2.10484	0.519	0.038	1.99885e-181	8	CTD-3110H11.1	1.36214e-74	2.10484	0.519	0.038	8.17283e-71	8	CTD-3110H11.1
REL1	2.37569e-176	2.67196	0.931	0.332	1.42541e-172	8	REL	8.17717e-142	2.67196	0.931	0.332	4.9063e-138	8	REL
LCMT1-AS11	2.92044e-174	1.96518	0.6	0.072	1.75226e-170	8	LCMT1-AS1	3.74391e-85	1.96518	0.6	0.072	2.24635e-81	8	LCMT1-AS1
LINC00694	1.49501e-171	3.81824	0.538	0.06	8.97005e-168	8	LINC00694	4.62709e-15	3.81824	0.538	0.06	2.77626e-11	8	LINC00694
WSCD2	9.84683e-164	2.43538	0.545	0.057	5.9081e-160	8	WSCD2	8.1275e-23	2.43538	0.545	0.057	4.8765e-19	8	WSCD2
NFKB2	8.51319e-163	1.78235	0.926	0.293	5.10792e-159	8	NFKB2	5.48592e-109	1.78235	0.926	0.293	3.29155e-105	8	NFKB2
CTC-503J8.4	1.63599e-116	14.6084	0.6	0.126	9.81596e-113	8	CTC-503J8.4	1.08872e-33	14.6084	0.6	0.126	6.53235e-30	8	CTC-503J8.4
FBXO43	4.84841e-108	3.08143	0.512	0.098	2.90905e-104	8	FBXO43	2.09158e-48	3.08143	0.512	0.098	1.25495e-44	8	FBXO43
ZSWIM41	1.08192e-98	8.4227	0.61	0.18	6.4915e-95	8	ZSWIM4	1.27914e-40	8.4227	0.61	0.18	7.67482e-37	8	ZSWIM4
IDS2	3.26005e-41	2.36037	0.656	0.373	1.95603e-37	8	IDS	7.44452e-37	2.36037	0.656	0.373	4.46671e-33	8	IDS
CENPE	7.59313e-36	1.63776	0.617	0.315	4.55588e-32	8	CENPE	2.30166e-40	1.63776	0.617	0.315	1.381e-36	8	CENPE

## Sheet: 1-4
Table 1-4. The DEGs for each cluster in LC
	p_val_mast	avg_logFC_mast	pct.1_mast	pct.2_mast	p_val_adj_mast	cluster_mast	gene_mast	p_val_wilcox	avg_logFC_wilcox	pct.1_wilcox	pct.2_wilcox	p_val_adj_wilcox	cluster_wilcox	gene_wilcox
CCL18	0	2.75707	0.65	0.19	0	0	CCL18	0	2.75707	0.65	0.19	0	0	CCL18	Myeloid cells
LYZ	0	2.72013	0.977	0.326	0	0	LYZ	0	2.72013	0.977	0.326	0	0	LYZ
APOC1	0	2.7039	0.854	0.426	0	0	APOC1	0	2.7039	0.854	0.426	0	0	APOC1
C1QB	0	2.51521	0.776	0.226	0	0	C1QB	0	2.51521	0.776	0.226	0	0	C1QB
APOE	0	2.44939	0.771	0.348	0	0	APOE	0	2.44939	0.771	0.348	0	0	APOE
C1QA	0	2.43591	0.799	0.236	0	0	C1QA	0	2.43591	0.799	0.236	0	0	C1QA
TYROBP	0	2.20781	0.994	0.389	0	0	TYROBP	0	2.20781	0.994	0.389	0	0	TYROBP
HLA-DRA	0	2.1135	0.997	0.778	0	0	HLA-DRA	0	2.1135	0.997	0.778	0	0	HLA-DRA
FCER1G	0	1.96482	0.978	0.295	0	0	FCER1G	0	1.96482	0.978	0.295	0	0	FCER1G
AIF1	0	1.85876	0.961	0.092	0	0	AIF1	0	1.85876	0.961	0.092	0	0	AIF1
C1QC	0	1.82643	0.686	0.061	0	0	C1QC	0	1.82643	0.686	0.061	0	0	C1QC
HLA-DPB1	0	1.72437	0.98	0.652	0	0	HLA-DPB1	0	1.72437	0.98	0.652	0	0	HLA-DPB1
CD68	0	1.72205	0.91	0.107	0	0	CD68	0	1.72205	0.91	0.107	0	0	CD68
HLA-DPA1	0	1.68511	0.977	0.643	0	0	HLA-DPA1	0	1.68511	0.977	0.643	0	0	HLA-DPA1
MARCO	0	1.65289	0.689	0.055	0	0	MARCO	0	1.65289	0.689	0.055	0	0	MARCO
CTSB	0	1.63454	0.941	0.454	0	0	CTSB	0	1.63454	0.941	0.454	0	0	CTSB
CST3	0	1.62289	0.992	0.596	0	0	CST3	0	1.62289	0.992	0.596	0	0	CST3
PSAP	0	1.60674	0.979	0.632	0	0	PSAP	0	1.60674	0.979	0.632	0	0	PSAP
S100A8	0	1.5967	0.693	0.158	0	0	S100A8	0	1.5967	0.693	0.158	0	0	S100A8
CTSD	0	1.59291	0.903	0.677	0	0	CTSD	0	1.59291	0.903	0.677	0	0	CTSD
GLUL	0	1.59091	0.939	0.426	0	0	GLUL	0	1.59091	0.939	0.426	0	0	GLUL
HLA-DRB5	0	1.54828	0.775	0.204	0	0	HLA-DRB5	0	1.54828	0.775	0.204	0	0	HLA-DRB5
HLA-DQA1	0	1.53021	0.866	0.291	0	0	HLA-DQA1	0	1.53021	0.866	0.291	0	0	HLA-DQA1
GRN	0	1.47248	0.924	0.308	0	0	GRN	0	1.47248	0.924	0.308	0	0	GRN
HLA-DRB1	0	1.4693	0.978	0.696	0	0	HLA-DRB1	0	1.4693	0.978	0.696	0	0	HLA-DRB1
MS4A7	0	1.43956	0.812	0.033	0	0	MS4A7	0	1.43956	0.812	0.033	0	0	MS4A7
CTSS	0	1.40991	0.937	0.277	0	0	CTSS	0	1.40991	0.937	0.277	0	0	CTSS
GPX1	0	1.40478	0.986	0.643	0	0	GPX1	0	1.40478	0.986	0.643	0	0	GPX1
HLA-DQB1	0	1.39011	0.909	0.347	0	0	HLA-DQB1	0	1.39011	0.909	0.347	0	0	HLA-DQB1
FBP1	0	1.37446	0.731	0.101	0	0	FBP1	0	1.37446	0.731	0.101	0	0	FBP1
CTSZ	0	1.33216	0.837	0.16	0	0	CTSZ	0	1.33216	0.837	0.16	0	0	CTSZ
LST1	0	1.32825	0.872	0.097	0	0	LST1	0	1.32825	0.872	0.097	0	0	LST1
S100A9	0	1.3126	0.845	0.345	0	0	S100A9	0	1.3126	0.845	0.345	0	0	S100A9
LGALS3	0	1.3081	0.868	0.498	0	0	LGALS3	0	1.3081	0.868	0.498	0	0	LGALS3
MS4A6A	0	1.30406	0.724	0.041	0	0	MS4A6A	0	1.30406	0.724	0.041	0	0	MS4A6A
C1orf162	0	1.24303	0.866	0.115	0	0	C1orf162	0	1.24303	0.866	0.115	0	0	C1orf162
GPNMB	0	1.23311	0.696	0.069	0	0	GPNMB	0	1.23311	0.696	0.069	0	0	GPNMB
LGALS1	0	1.21849	0.984	0.649	0	0	LGALS1	0	1.21849	0.984	0.649	0	0	LGALS1
ACP5	0	1.21004	0.753	0.203	0	0	ACP5	0	1.21004	0.753	0.203	0	0	ACP5
VIM	0	1.19825	0.992	0.759	0	0	VIM	0	1.19825	0.992	0.759	0	0	VIM
SPI1	0	1.1567	0.849	0.051	0	0	SPI1	0	1.1567	0.849	0.051	0	0	SPI1
VSIG4	0	1.15235	0.641	0.029	0	0	VSIG4	0	1.15235	0.641	0.029	0	0	VSIG4
CAPG	0	1.15088	0.868	0.272	0	0	CAPG	0	1.15088	0.868	0.272	0	0	CAPG
HLA-DMA	0	1.11592	0.874	0.277	0	0	HLA-DMA	0	1.11592	0.874	0.277	0	0	HLA-DMA
TYMP	0	1.11193	0.926	0.395	0	0	TYMP	0	1.11193	0.926	0.395	0	0	TYMP
SERPINA1	0	1.10154	0.853	0.221	0	0	SERPINA1	0	1.10154	0.853	0.221	0	0	SERPINA1
CSTB	0	1.0945	0.967	0.735	0	0	CSTB	0	1.0945	0.967	0.735	0	0	CSTB
CTSL	0	1.09205	0.691	0.161	0	0	CTSL	0	1.09205	0.691	0.161	0	0	CTSL
FN1	0	1.08176	0.533	0.13	0	0	FN1	0	1.08176	0.533	0.13	0	0	FN1
CD14	0	1.0661	0.6	0.049	0	0	CD14	0	1.0661	0.6	0.049	0	0	CD14
GCHFR	0	1.05557	0.596	0.237	0	0	GCHFR	0	1.05557	0.596	0.237	0	0	GCHFR
FCGRT	0	1.04747	0.833	0.211	0	0	FCGRT	0	1.04747	0.833	0.211	0	0	FCGRT
FABP5	0	1.01407	0.693	0.247	0	0	FABP5	0	1.01407	0.693	0.247	0	0	FABP5
ALDH2	0	1.01102	0.687	0.164	0	0	ALDH2	0	1.01102	0.687	0.164	0	0	ALDH2
MRC1	0	1.00926	0.648	0.026	0	0	MRC1	0	1.00926	0.648	0.026	0	0	MRC1
CCL5	0	1.79298	0.737	0.168	0	1	CCL5	0	1.79298	0.737	0.168	0	1	CCL5	T & NK cells
NKG7	0	1.61253	0.579	0.167	0	1	NKG7	0	1.61253	0.579	0.167	0	1	NKG7
GZMB	0	1.57174	0.538	0.129	0	1	GZMB	0	1.57174	0.538	0.129	0	1	GZMB
CCL4	0	1.50029	0.59	0.227	0	1	CCL4	0	1.50029	0.59	0.227	0	1	CCL4
IL32	0	1.39492	0.892	0.332	0	1	IL32	0	1.39492	0.892	0.332	0	1	IL32
TRAC	0	1.38017	0.835	0.157	0	1	TRAC	0	1.38017	0.835	0.157	0	1	TRAC
CD3D	0	1.34254	0.847	0.16	0	1	CD3D	0	1.34254	0.847	0.16	0	1	CD3D
GZMA	0	1.33205	0.628	0.117	0	1	GZMA	0	1.33205	0.628	0.117	0	1	GZMA
CD2	0	1.30188	0.843	0.126	0	1	CD2	0	1.30188	0.843	0.126	0	1	CD2
CD7	0	1.11105	0.706	0.161	0	1	CD7	0	1.11105	0.706	0.161	0	1	CD7
TRBC2	0	1.07629	0.705	0.149	0	1	TRBC2	0	1.07629	0.705	0.149	0	1	TRBC2
TRBC1	0	1.06582	0.569	0.106	0	1	TRBC1	0	1.06582	0.569	0.106	0	1	TRBC1
HBB	0	2.49435	0.988	0.348	0	2	HBB	0	2.49435	0.988	0.348	0	2	HBB	T & NK cells
HBA1	0	2.18835	0.866	0.143	0	2	HBA1	0	2.18835	0.866	0.143	0	2	HBA1
HBA2	0	1.94798	0.898	0.243	0	2	HBA2	0	1.94798	0.898	0.243	0	2	HBA2
RPL39	0	1.08513	0.99	0.767	0	2	RPL39	0	1.08513	0.99	0.767	0	2	RPL39
SFTPC	0	4.77278	0.649	0.347	0	3	SFTPC	0	4.77278	0.649	0.347	0	3	SFTPC	Alveolar cells
SCGB3A2	0	3.66076	0.624	0.153	0	3	SCGB3A2	0	3.66076	0.624	0.153	0	3	SCGB3A2
SFTPA2	0	3.54735	0.646	0.153	0	3	SFTPA2	0	3.54735	0.646	0.153	0	3	SFTPA2
SFTPA1	0	3.4711	0.63	0.133	0	3	SFTPA1	0	3.4711	0.63	0.133	0	3	SFTPA1
SFTPB	0	3.3956	0.8	0.196	0	3	SFTPB	0	3.3956	0.8	0.196	0	3	SFTPB
SCGB3A1	0	3.33626	0.504	0.167	0	3	SCGB3A1	0	3.33626	0.504	0.167	0	3	SCGB3A1
NAPSA	0	2.54098	0.732	0.081	0	3	NAPSA	0	2.54098	0.732	0.081	0	3	NAPSA
SLPI	0	2.46952	0.763	0.203	0	3	SLPI	0	2.46952	0.763	0.203	0	3	SLPI
SFTPD	0	2.15468	0.685	0.041	0	3	SFTPD	0	2.15468	0.685	0.041	0	3	SFTPD
WFDC2	0	2.0142	0.754	0.132	0	3	WFDC2	0	2.0142	0.754	0.132	0	3	WFDC2
EMP2	0	1.98451	0.735	0.103	0	3	EMP2	0	1.98451	0.735	0.103	0	3	EMP2
SFTA2	0	1.82552	0.786	0.122	0	3	SFTA2	0	1.82552	0.786	0.122	0	3	SFTA2
CYB5A	0	1.71361	0.91	0.322	0	3	CYB5A	0	1.71361	0.91	0.322	0	3	CYB5A
PGC	0	1.65019	0.518	0.031	0	3	PGC	0	1.65019	0.518	0.031	0	3	PGC
CXCL17	0	1.63587	0.624	0.044	0	3	CXCL17	0	1.63587	0.624	0.044	0	3	CXCL17
FXYD3	0	1.5644	0.857	0.084	0	3	FXYD3	0	1.5644	0.857	0.084	0	3	FXYD3
ADIRF	0	1.5547	0.68	0.086	0	3	ADIRF	0	1.5547	0.68	0.086	0	3	ADIRF
KRT19	0	1.50199	0.837	0.15	0	3	KRT19	0	1.50199	0.837	0.15	0	3	KRT19
HOPX	0	1.45854	0.815	0.215	0	3	HOPX	0	1.45854	0.815	0.215	0	3	HOPX
SLC34A2	0	1.4439	0.685	0.037	0	3	SLC34A2	0	1.4439	0.685	0.037	0	3	SLC34A2
KRT18	0	1.37779	0.886	0.169	0	3	KRT18	0	1.37779	0.886	0.169	0	3	KRT18
AGR3	0	1.37244	0.666	0.04	0	3	AGR3	0	1.37244	0.666	0.04	0	3	AGR3
GPRC5A	0	1.34342	0.69	0.065	0	3	GPRC5A	0	1.34342	0.69	0.065	0	3	GPRC5A
MUC1	0	1.30482	0.728	0.108	0	3	MUC1	0	1.30482	0.728	0.108	0	3	MUC1
SFTA3	0	1.2615	0.717	0.033	0	3	SFTA3	0	1.2615	0.717	0.033	0	3	SFTA3
FOLR1	0	1.2257	0.717	0.033	0	3	FOLR1	0	1.2257	0.717	0.033	0	3	FOLR1
HSPB1	0	1.21654	0.891	0.584	0	3	HSPB1	0	1.21654	0.891	0.584	0	3	HSPB1
KRT8	0	1.18252	0.811	0.141	0	3	KRT8	0	1.18252	0.811	0.141	0	3	KRT8
SFN	0	1.18098	0.636	0.095	0	3	SFN	0	1.18098	0.636	0.095	0	3	SFN
KRT7	0	1.15554	0.72	0.152	0	3	KRT7	0	1.15554	0.72	0.152	0	3	KRT7
TM4SF1	0	1.12417	0.685	0.136	0	3	TM4SF1	0	1.12417	0.685	0.136	0	3	TM4SF1
DSTN	0	1.11758	0.935	0.448	0	3	DSTN	0	1.11758	0.935	0.448	0	3	DSTN
CLDN18	0	1.08622	0.506	0.007	0	3	CLDN18	0	1.08622	0.506	0.007	0	3	CLDN18
RNASE1	0	1.08439	0.8	0.237	0	3	RNASE1	0	1.08439	0.8	0.237	0	3	RNASE1
C8orf4	0	1.07616	0.594	0.119	0	3	C8orf4	0	1.07616	0.594	0.119	0	3	C8orf4
AK1	0	1.04294	0.694	0.099	0	3	AK1	0	1.04294	0.694	0.099	0	3	AK1
CD91	0	1.03826	0.924	0.436	0	3	CD9	0	1.03826	0.924	0.436	0	3	CD9
C16orf89	0	1.01267	0.553	0.016	0	3	C16orf89	0	1.01267	0.553	0.016	0	3	C16orf89
SDC4	0	1.00352	0.662	0.136	0	3	SDC4	0	1.00352	0.662	0.136	0	3	SDC4
CD79A	0	1.57797	0.902	0.058	0	4	CD79A	0	1.57797	0.902	0.058	0	4	CD79A	B & Plasma cells
MS4A1	0	1.49696	0.852	0.013	0	4	MS4A1	0	1.49696	0.852	0.013	0	4	MS4A1
CD37	0	1.09881	0.966	0.527	0	4	CD37	0	1.09881	0.966	0.527	0	4	CD37
VPREB3	0	1.02435	0.639	0.014	0	4	VPREB3	0	1.02435	0.639	0.014	0	4	VPREB3
FGB	0	3.04293	0.904	0.035	0	5	FGB	0	3.04293	0.904	0.035	0	5	FGB	Cancer cells
LCN2	0	2.73115	0.832	0.078	0	5	LCN2	0	2.73115	0.832	0.078	0	5	LCN2
FGG	0	2.67825	0.84	0.044	0	5	FGG	0	2.67825	0.84	0.044	0	5	FGG
FGA	0	2.6297	0.841	0.025	0	5	FGA	0	2.6297	0.841	0.025	0	5	FGA
SPP1	0	2.61931	0.99	0.213	0	5	SPP1	0	2.61931	0.99	0.213	0	5	SPP1
AKR1C2	0	2.43756	0.912	0.056	0	5	AKR1C2	0	2.43756	0.912	0.056	0	5	AKR1C2
S100P	0	2.31035	0.949	0.062	0	5	S100P	0	2.31035	0.949	0.062	0	5	S100P
TFF1	0	2.25312	0.816	0.014	0	5	TFF1	0	2.25312	0.816	0.014	0	5	TFF1
MDK	0	2.14417	0.942	0.156	0	5	MDK	0	2.14417	0.942	0.156	0	5	MDK
TACSTD21	0	2.06974	0.913	0.104	0	5	TACSTD2	0	2.06974	0.913	0.104	0	5	TACSTD2
ERO1A	0	1.97785	0.885	0.165	0	5	ERO1A	0	1.97785	0.885	0.165	0	5	ERO1A
MUC11	0	1.89894	0.899	0.11	0	5	MUC1	0	1.89894	0.899	0.11	0	5	MUC1
TESC	0	1.88062	0.775	0.068	0	5	TESC	0	1.88062	0.775	0.068	0	5	TESC
KRT17	0	1.85115	0.692	0.061	0	5	KRT17	0	1.85115	0.692	0.061	0	5	KRT17
PDZK1IP1	0	1.843	0.871	0.056	0	5	PDZK1IP1	0	1.843	0.871	0.056	0	5	PDZK1IP1
F3	0	1.73672	0.841	0.058	0	5	F3	0	1.73672	0.841	0.058	0	5	F3
S100A16	0	1.73372	0.903	0.118	0	5	S100A16	0	1.73372	0.903	0.118	0	5	S100A16
PERP1	0	1.70741	0.946	0.155	0	5	PERP	0	1.70741	0.946	0.155	0	5	PERP
KRT71	0	1.70161	0.944	0.151	0	5	KRT7	0	1.70161	0.944	0.151	0	5	KRT7
PAEP	0	1.68567	0.847	0.062	0	5	PAEP	0	1.68567	0.847	0.062	0	5	PAEP
SFN1	0	1.68557	0.877	0.093	0	5	SFN	0	1.68557	0.877	0.093	0	5	SFN
PTGR1	0	1.66913	0.871	0.086	0	5	PTGR1	0	1.66913	0.871	0.086	0	5	PTGR1
AGR21	0	1.63609	0.691	0.111	0	5	AGR2	0	1.63609	0.691	0.111	0	5	AGR2
SLPI1	0	1.63591	0.927	0.204	0	5	SLPI	0	1.63591	0.927	0.204	0	5	SLPI
ERRFI1	0	1.60782	0.844	0.103	0	5	ERRFI1	0	1.60782	0.844	0.103	0	5	ERRFI1
CD1511	0	1.56432	0.937	0.301	0	5	CD151	0	1.56432	0.937	0.301	0	5	CD151
SPINT1	0	1.55583	0.886	0.111	0	5	SPINT1	0	1.55583	0.886	0.111	0	5	SPINT1
TMEM141	0	1.54968	0.908	0.202	0	5	TMEM141	0	1.54968	0.908	0.202	0	5	TMEM141
EPCAM1	0	1.52942	0.916	0.123	0	5	EPCAM	0	1.52942	0.916	0.123	0	5	EPCAM
ASPH	0	1.50505	0.858	0.133	0	5	ASPH	0	1.50505	0.858	0.133	0	5	ASPH
TALDO1	0	1.49442	0.967	0.483	0	5	TALDO1	0	1.49442	0.967	0.483	0	5	TALDO1
S100A141	0	1.45958	0.864	0.083	0	5	S100A14	0	1.45958	0.864	0.083	0	5	S100A14
IGFBP3	0	1.45303	0.694	0.049	0	5	IGFBP3	0	1.45303	0.694	0.049	0	5	IGFBP3
SPINT21	0	1.44374	0.941	0.331	0	5	SPINT2	0	1.44374	0.941	0.331	0	5	SPINT2
KRT181	0	1.43784	0.93	0.178	0	5	KRT18	0	1.43784	0.93	0.178	0	5	KRT18
CLDN71	0	1.40537	0.865	0.124	0	5	CLDN7	0	1.40537	0.865	0.124	0	5	CLDN7
SFTA21	0	1.37489	0.885	0.128	0	5	SFTA2	0	1.37489	0.885	0.128	0	5	SFTA2
TXN	0	1.3608	0.992	0.73	0	5	TXN	0	1.3608	0.992	0.73	0	5	TXN
AKR1C3	0	1.34261	0.805	0.127	0	5	AKR1C3	0	1.34261	0.805	0.127	0	5	AKR1C3
RANBP1	0	1.33849	0.932	0.41	0	5	RANBP1	0	1.33849	0.932	0.41	0	5	RANBP1
LAMB3	0	1.31894	0.741	0.054	0	5	LAMB3	0	1.31894	0.741	0.054	0	5	LAMB3
C15orf481	0	1.30328	0.835	0.267	0	5	C15orf48	0	1.30328	0.835	0.267	0	5	C15orf48
CA12	0	1.28955	0.731	0.015	0	5	CA12	0	1.28955	0.731	0.015	0	5	CA12
MGST11	0	1.26843	0.928	0.272	0	5	MGST1	0	1.26843	0.928	0.272	0	5	MGST1
MSLN	0	1.23888	0.778	0.038	0	5	MSLN	0	1.23888	0.778	0.038	0	5	MSLN
KRT81	0	1.22978	0.869	0.148	0	5	KRT8	0	1.22978	0.869	0.148	0	5	KRT8
RNASET21	0	1.22552	0.907	0.473	0	5	RNASET2	0	1.22552	0.907	0.473	0	5	RNASET2
CD551	0	1.22155	0.843	0.314	0	5	CD55	0	1.22155	0.843	0.314	0	5	CD55
GPX2	0	1.21324	0.616	0.031	0	5	GPX2	0	1.21324	0.616	0.031	0	5	GPX2
CLDN41	0	1.20733	0.778	0.103	0	5	CLDN4	0	1.20733	0.778	0.103	0	5	CLDN4
SLC2A1	0	1.16405	0.774	0.072	0	5	SLC2A1	0	1.16405	0.774	0.072	0	5	SLC2A1
LAMC2	0	1.13026	0.655	0.026	0	5	LAMC2	0	1.13026	0.655	0.026	0	5	LAMC2
HMGN1	0	1.12515	0.967	0.637	0	5	HMGN1	0	1.12515	0.967	0.637	0	5	HMGN1
KRTCAP3	0	1.11335	0.786	0.055	0	5	KRTCAP3	0	1.11335	0.786	0.055	0	5	KRTCAP3
B4GALT1	0	1.10534	0.685	0.165	0	5	B4GALT1	0	1.10534	0.685	0.165	0	5	B4GALT1
PTTG1IP	0	1.10176	0.859	0.239	0	5	PTTG1IP	0	1.10176	0.859	0.239	0	5	PTTG1IP
HIST1H1C	0	1.09256	0.698	0.128	0	5	HIST1H1C	0	1.09256	0.698	0.128	0	5	HIST1H1C
AQP3	0	1.09132	0.746	0.179	0	5	AQP3	0	1.09132	0.746	0.179	0	5	AQP3
CPE	0	1.07951	0.642	0.048	0	5	CPE	0	1.07951	0.642	0.048	0	5	CPE
RAB251	0	1.07597	0.808	0.076	0	5	RAB25	0	1.07597	0.808	0.076	0	5	RAB25
PLP2	0	1.07399	0.921	0.434	0	5	PLP2	0	1.07399	0.921	0.434	0	5	PLP2
GOLM1	0	1.07	0.735	0.046	0	5	GOLM1	0	1.07	0.735	0.046	0	5	GOLM1
CDA	0	1.06351	0.73	0.053	0	5	CDA	0	1.06351	0.73	0.053	0	5	CDA
SMIM22	0	1.05616	0.805	0.082	0	5	SMIM22	0	1.05616	0.805	0.082	0	5	SMIM22
HSPB11	0	1.05433	0.969	0.585	0	5	HSPB1	0	1.05433	0.969	0.585	0	5	HSPB1
KLK5	0	1.04044	0.605	0.004	0	5	KLK5	0	1.04044	0.605	0.004	0	5	KLK5
SLC16A31	0	1.0366	0.859	0.309	0	5	SLC16A3	0	1.0366	0.859	0.309	0	5	SLC16A3
JTB	0	1.0351	0.931	0.556	0	5	JTB	0	1.0351	0.931	0.556	0	5	JTB
NQO1	0	1.02698	0.703	0.074	0	5	NQO1	0	1.02698	0.703	0.074	0	5	NQO1
FKBP2	0	1.02364	0.905	0.402	0	5	FKBP2	0	1.02364	0.905	0.402	0	5	FKBP2
COMT1	0	1.01967	0.886	0.389	0	5	COMT	0	1.01967	0.886	0.389	0	5	COMT
PHPT1	0	1.00676	0.926	0.423	0	5	PHPT1	0	1.00676	0.926	0.423	0	5	PHPT1
SQSTM1	0	1.00658	0.894	0.432	0	5	SQSTM1	0	1.00658	0.894	0.432	0	5	SQSTM1
SLC39A1	0	1.003	0.835	0.188	0	5	SLC39A1	0	1.003	0.835	0.188	0	5	SLC39A1
CLDN5	0	2.55082	0.912	0.04	0	6	CLDN5	0	2.55082	0.912	0.04	0	6	CLDN5	Endothelial cells
FCN3	0	2.19443	0.529	0.028	0	6	FCN3	0	2.19443	0.529	0.028	0	6	FCN3
SPARCL1	0	2.16711	0.807	0.04	0	6	SPARCL1	0	2.16711	0.807	0.04	0	6	SPARCL1
IGFBP7	0	2.15853	0.757	0.128	0	6	IGFBP7	0	2.15853	0.757	0.128	0	6	IGFBP7
C10orf10	0	1.99722	0.672	0.066	0	6	C10orf10	0	1.99722	0.672	0.066	0	6	C10orf10
RAMP2	0	1.97978	0.945	0.021	0	6	RAMP2	0	1.97978	0.945	0.021	0	6	RAMP2
TM4SF12	0	1.94753	0.895	0.139	0	6	TM4SF1	0	1.94753	0.895	0.139	0	6	TM4SF1
VWF	0	1.83904	0.78	0.023	0	6	VWF	0	1.83904	0.78	0.023	0	6	VWF
MGP	0	1.82757	0.683	0.078	0	6	MGP	0	1.82757	0.683	0.078	0	6	MGP
EPAS1	0	1.75081	0.89	0.114	0	6	EPAS1	0	1.75081	0.89	0.114	0	6	EPAS1
IFITM31	0	1.74616	0.991	0.413	0	6	IFITM3	0	1.74616	0.991	0.413	0	6	IFITM3
GNG11	0	1.73724	0.875	0.044	0	6	GNG11	0	1.73724	0.875	0.044	0	6	GNG11
IFI271	0	1.68715	0.941	0.286	0	6	IFI27	0	1.68715	0.941	0.286	0	6	IFI27
TIMP3	0	1.59078	0.802	0.061	0	6	TIMP3	0	1.59078	0.802	0.061	0	6	TIMP3
SDPR	0	1.57963	0.767	0.038	0	6	SDPR	0	1.57963	0.767	0.038	0	6	SDPR
CAV11	0	1.53232	0.879	0.091	0	6	CAV1	0	1.53232	0.879	0.091	0	6	CAV1
AQP1	0	1.5323	0.77	0.051	0	6	AQP1	0	1.5323	0.77	0.051	0	6	AQP1
HYAL2	0	1.47863	0.838	0.069	0	6	HYAL2	0	1.47863	0.838	0.069	0	6	HYAL2
CLEC14A	0	1.4673	0.772	0.006	0	6	CLEC14A	0	1.4673	0.772	0.006	0	6	CLEC14A
TMEM100	0	1.46687	0.508	0.014	0	6	TMEM100	0	1.46687	0.508	0.014	0	6	TMEM100
GPX3	0	1.37282	0.686	0.16	0	6	GPX3	0	1.37282	0.686	0.16	0	6	GPX3
SPARC	0	1.35731	0.806	0.094	0	6	SPARC	0	1.35731	0.806	0.094	0	6	SPARC
A2M	0	1.35522	0.787	0.126	0	6	A2M	0	1.35522	0.787	0.126	0	6	A2M
EGFL71	0	1.35089	0.837	0.069	0	6	EGFL7	0	1.35089	0.837	0.069	0	6	EGFL7
EMP1	0	1.3391	0.612	0.136	0	6	EMP1	0	1.3391	0.612	0.136	0	6	EMP1
PECAM1	0	1.29127	0.863	0.175	0	6	PECAM1	0	1.29127	0.863	0.175	0	6	PECAM1
RAMP3	0	1.25865	0.652	0.011	0	6	RAMP3	0	1.25865	0.652	0.011	0	6	RAMP3
SOCS3	0	1.24404	0.63	0.283	0	6	SOCS3	0	1.24404	0.63	0.283	0	6	SOCS3
CD592	0	1.23943	0.887	0.408	0	6	CD59	0	1.23943	0.887	0.408	0	6	CD59
ID11	0	1.22398	0.628	0.111	0	6	ID1	0	1.22398	0.628	0.111	0	6	ID1
PRSS23	0	1.21229	0.601	0.06	0	6	PRSS23	0	1.21229	0.601	0.06	0	6	PRSS23
APP	0	1.20619	0.804	0.173	0	6	APP	0	1.20619	0.804	0.173	0	6	APP
ADIRF1	0	1.1732	0.596	0.1	0	6	ADIRF	0	1.1732	0.596	0.1	0	6	ADIRF
TNFSF10	0	1.16998	0.675	0.197	0	6	TNFSF10	0	1.16998	0.675	0.197	0	6	TNFSF10
PDLIM11	0	1.16059	0.767	0.241	0	6	PDLIM1	0	1.16059	0.767	0.241	0	6	PDLIM1
SLC9A3R2	0	1.15896	0.594	0.036	0	6	SLC9A3R2	0	1.15896	0.594	0.036	0	6	SLC9A3R2
ENG	0	1.13968	0.732	0.143	0	6	ENG	0	1.13968	0.732	0.143	0	6	ENG
C8orf41	0	1.12305	0.607	0.128	0	6	C8orf4	0	1.12305	0.607	0.128	0	6	C8orf4
ID31	0	1.09029	0.61	0.194	0	6	ID3	0	1.09029	0.61	0.194	0	6	ID3
ESAM	0	1.08803	0.713	0.021	0	6	ESAM	0	1.08803	0.713	0.021	0	6	ESAM
CD93	0	1.08322	0.66	0.053	0	6	CD93	0	1.08322	0.66	0.053	0	6	CD93
FKBP1A1	0	1.07024	0.909	0.65	0	6	FKBP1A	0	1.07024	0.909	0.65	0	6	FKBP1A
CRIP2	0	1.06996	0.746	0.099	0	6	CRIP2	0	1.06996	0.746	0.099	0	6	CRIP2
COL4A1	0	1.04707	0.521	0.028	0	6	COL4A1	0	1.04707	0.521	0.028	0	6	COL4A1
CALCRL	0	1.02666	0.657	0.01	0	6	CALCRL	0	1.02666	0.657	0.01	0	6	CALCRL
PTRF	0	1.01689	0.73	0.059	0	6	PTRF	0	1.01689	0.73	0.059	0	6	PTRF
ECSCR.1	0	1.00849	0.689	0.018	0	6	ECSCR.1	0	1.00849	0.689	0.018	0	6	ECSCR.1
PCAT19	0	1.00762	0.651	0.009	0	6	PCAT19	0	1.00762	0.651	0.009	0	6	PCAT19
MT1X	2.5494116249e-313	1.21733	0.502	0.254	0	6	MT1X	9.61572e-167	1.21733	0.502	0.254	1.83718e-162	6	MT1X
FABP7	0	2.95719	0.829	0.018	0	7	FABP7	0	2.95719	0.829	0.018	0	7	FABP7	cancer cells
STMN1	0	2.09666	0.985	0.288	0	7	STMN1	0	2.09666	0.985	0.288	0	7	STMN1
CDKN2A	0	1.99168	0.964	0.059	0	7	CDKN2A	0	1.99168	0.964	0.059	0	7	CDKN2A
SOX4	0	1.94659	0.908	0.152	0	7	SOX4	0	1.94659	0.908	0.152	0	7	SOX4
ELF32	0	1.77729	0.867	0.11	0	7	ELF3	0	1.77729	0.867	0.11	0	7	ELF3
TUBA1A	0	1.66519	0.906	0.367	0	7	TUBA1A	0	1.66519	0.906	0.367	0	7	TUBA1A
IFI272	0	1.62439	0.988	0.288	0	7	IFI27	0	1.62439	0.988	0.288	0	7	IFI27
AZGP1	0	1.50612	0.859	0.027	0	7	AZGP1	0	1.50612	0.859	0.027	0	7	AZGP1
TUBA1B	0	1.48409	0.978	0.706	0	7	TUBA1B	0	1.48409	0.978	0.706	0	7	TUBA1B
ISG15	0	1.48201	0.938	0.428	0	7	ISG15	0	1.48201	0.938	0.428	0	7	ISG15
EPCAM2	0	1.40007	0.896	0.131	0	7	EPCAM	0	1.40007	0.896	0.131	0	7	EPCAM
TUBB2B	0	1.39628	0.747	0.007	0	7	TUBB2B	0	1.39628	0.747	0.007	0	7	TUBB2B
RBP1	0	1.39239	0.818	0.057	0	7	RBP1	0	1.39239	0.818	0.057	0	7	RBP1
EHF	0	1.38291	0.777	0.033	0	7	EHF	0	1.38291	0.777	0.033	0	7	EHF
HDAC2	0	1.36746	0.898	0.182	0	7	HDAC2	0	1.36746	0.898	0.182	0	7	HDAC2
MARCKSL12	0	1.34481	0.906	0.189	0	7	MARCKSL1	0	1.34481	0.906	0.189	0	7	MARCKSL1
TUBB	0	1.31506	0.966	0.554	0	7	TUBB	0	1.31506	0.966	0.554	0	7	TUBB
HSP90AB1	0	1.2734	0.995	0.756	0	7	HSP90AB1	0	1.2734	0.995	0.756	0	7	HSP90AB1
KRT182	0	1.27077	0.935	0.185	0	7	KRT18	0	1.27077	0.935	0.185	0	7	KRT18
CD241	0	1.26158	0.752	0.097	0	7	CD24	0	1.26158	0.752	0.097	0	7	CD24
KRT192	0	1.23806	0.849	0.166	0	7	KRT19	0	1.23806	0.849	0.166	0	7	KRT19
MDK1	0	1.19922	0.914	0.164	0	7	MDK	0	1.19922	0.914	0.164	0	7	MDK
CCT51	0	1.19466	0.9	0.288	0	7	CCT5	0	1.19466	0.9	0.288	0	7	CCT5
IFI61	0	1.15698	0.878	0.411	0	7	IFI6	0	1.15698	0.878	0.411	0	7	IFI6
ILF21	0	1.14712	0.878	0.289	0	7	ILF2	0	1.14712	0.878	0.289	0	7	ILF2
PERP2	0	1.13616	0.872	0.165	0	7	PERP	0	1.13616	0.872	0.165	0	7	PERP
DUSP23	0	1.13597	0.826	0.28	0	7	DUSP23	0	1.13597	0.826	0.28	0	7	DUSP23
SRP91	0	1.13436	0.932	0.43	0	7	SRP9	0	1.13436	0.932	0.43	0	7	SRP9
GBP1	0	1.13219	0.674	0.174	0	7	GBP1	0	1.13219	0.674	0.174	0	7	GBP1
TPM2	0	1.12942	0.81	0.061	0	7	TPM2	0	1.12942	0.81	0.061	0	7	TPM2
PARP1	0	1.12861	0.862	0.257	0	7	PARP1	0	1.12861	0.862	0.257	0	7	PARP1
GDI2	0	1.11546	0.934	0.43	0	7	GDI2	0	1.11546	0.934	0.43	0	7	GDI2
UQCRH	0	1.1107	0.982	0.71	0	7	UQCRH	0	1.1107	0.982	0.71	0	7	UQCRH
DNAJA11	0	1.10854	0.922	0.459	0	7	DNAJA1	0	1.10854	0.922	0.459	0	7	DNAJA1
HSPD1	0	1.10448	0.887	0.36	0	7	HSPD1	0	1.10448	0.887	0.36	0	7	HSPD1
CCT3	0	1.08703	0.888	0.322	0	7	CCT3	0	1.08703	0.888	0.322	0	7	CCT3
NCOA7	0	1.07989	0.716	0.134	0	7	NCOA7	0	1.07989	0.716	0.134	0	7	NCOA7
FKBP4	0	1.07328	0.803	0.133	0	7	FKBP4	0	1.07328	0.803	0.133	0	7	FKBP4
HMGA1	0	1.03816	0.864	0.276	0	7	HMGA1	0	1.03816	0.864	0.276	0	7	HMGA1
SERBP1	0	1.02486	0.927	0.518	0	7	SERBP1	0	1.02486	0.927	0.518	0	7	SERBP1
CCT2	0	1.01563	0.843	0.225	0	7	CCT2	0	1.01563	0.843	0.225	0	7	CCT2
TPD52L1	0	1.00829	0.743	0.033	0	7	TPD52L1	0	1.00829	0.743	0.033	0	7	TPD52L1
TPI1	0	1.00733	0.993	0.775	0	7	TPI1	0	1.00733	0.993	0.775	0	7	TPI1
LUM	0	3.43374	0.821	0.028	0	8	LUM	0	3.43374	0.821	0.028	0	8	LUM	Fibroblast cells
COL1A1	0	3.32672	0.79	0.035	0	8	COL1A1	0	3.32672	0.79	0.035	0	8	COL1A1
DCN	0	3.24241	0.917	0.03	0	8	DCN	0	3.24241	0.917	0.03	0	8	DCN
COL3A1	0	3.21963	0.788	0.023	0	8	COL3A1	0	3.21963	0.788	0.023	0	8	COL3A1
COL1A2	0	3.19425	0.912	0.022	0	8	COL1A2	0	3.19425	0.912	0.022	0	8	COL1A2
MGP1	0	2.817	0.822	0.079	0	8	MGP	0	2.817	0.822	0.079	0	8	MGP
SPARC1	0	2.63618	0.944	0.095	0	8	SPARC	0	2.63618	0.944	0.095	0	8	SPARC
TIMP12	0	2.57249	0.969	0.478	0	8	TIMP1	0	2.57249	0.969	0.478	0	8	TIMP1
IGFBP71	0	2.5164	0.936	0.127	0	8	IGFBP7	0	2.5164	0.936	0.127	0	8	IGFBP7
RARRES2	0	2.44474	0.888	0.048	0	8	RARRES2	0	2.44474	0.888	0.048	0	8	RARRES2
TAGLN	0	2.44097	0.764	0.064	0	8	TAGLN	0	2.44097	0.764	0.064	0	8	TAGLN
BGN	0	2.37019	0.885	0.019	0	8	BGN	0	2.37019	0.885	0.019	0	8	BGN
ACTA2	0	2.2865	0.635	0.055	0	8	ACTA2	0	2.2865	0.635	0.055	0	8	ACTA2
CALD11	0	2.19743	0.933	0.05	0	8	CALD1	0	2.19743	0.933	0.05	0	8	CALD1
C1R	0	2.00597	0.901	0.053	0	8	C1R	0	2.00597	0.901	0.053	0	8	C1R
C1S	0	1.96237	0.888	0.043	0	8	C1S	0	1.96237	0.888	0.043	0	8	C1S
A2M1	0	1.95598	0.77	0.131	0	8	A2M	0	1.95598	0.77	0.131	0	8	A2M
COL6A2	0	1.95472	0.904	0.025	0	8	COL6A2	0	1.95472	0.904	0.025	0	8	COL6A2
SERPINF1	0	1.87764	0.714	0.098	0	8	SERPINF1	0	1.87764	0.714	0.098	0	8	SERPINF1
CTHRC1	0	1.7786	0.571	0.054	0	8	CTHRC1	0	1.7786	0.571	0.054	0	8	CTHRC1
COL6A3	0	1.74631	0.776	0.019	0	8	COL6A3	0	1.74631	0.776	0.019	0	8	COL6A3
MYL9	0	1.73012	0.822	0.079	0	8	MYL9	0	1.73012	0.822	0.079	0	8	MYL9
CTGF	0	1.69044	0.535	0.04	0	8	CTGF	0	1.69044	0.535	0.04	0	8	CTGF
CYR61	0	1.68767	0.549	0.053	0	8	CYR61	0	1.68767	0.549	0.053	0	8	CYR61
TPM21	0	1.68758	0.825	0.062	0	8	TPM2	0	1.68758	0.825	0.062	0	8	TPM2
NNMT1	0	1.65945	0.814	0.124	0	8	NNMT	0	1.65945	0.814	0.124	0	8	NNMT
SPARCL11	0	1.61028	0.793	0.045	0	8	SPARCL1	0	1.61028	0.793	0.045	0	8	SPARCL1
FN11	0	1.60509	0.874	0.251	0	8	FN1	0	1.60509	0.874	0.251	0	8	FN1
SERPING11	0	1.5912	0.945	0.242	0	8	SERPING1	0	1.5912	0.945	0.242	0	8	SERPING1
CCDC80	0	1.57249	0.643	0.012	0	8	CCDC80	0	1.57249	0.643	0.012	0	8	CCDC80
PCOLCE	0	1.5701	0.821	0.015	0	8	PCOLCE	0	1.5701	0.821	0.015	0	8	PCOLCE
MFAP4	0	1.55462	0.614	0.007	0	8	MFAP4	0	1.55462	0.614	0.007	0	8	MFAP4
IFITM33	0	1.55194	0.987	0.417	0	8	IFITM3	0	1.55194	0.987	0.417	0	8	IFITM3
COL6A1	0	1.5233	0.805	0.037	0	8	COL6A1	0	1.5233	0.805	0.037	0	8	COL6A1
THY1	0	1.46584	0.695	0.006	0	8	THY1	0	1.46584	0.695	0.006	0	8	THY1
MMP2	0	1.44554	0.683	0.019	0	8	MMP2	0	1.44554	0.683	0.019	0	8	MMP2
AEBP1	0	1.44209	0.743	0.012	0	8	AEBP1	0	1.44209	0.743	0.012	0	8	AEBP1
FBLN1	0	1.32773	0.585	0.012	0	8	FBLN1	0	1.32773	0.585	0.012	0	8	FBLN1
TIMP31	0	1.30568	0.568	0.072	0	8	TIMP3	0	1.30568	0.568	0.072	0	8	TIMP3
TPM12	0	1.28464	0.767	0.149	0	8	TPM1	0	1.28464	0.767	0.149	0	8	TPM1
SELM3	0	1.24331	0.869	0.247	0	8	SELM	0	1.24331	0.869	0.247	0	8	SELM
NBL1	0	1.15185	0.689	0.055	0	8	NBL1	0	1.15185	0.689	0.055	0	8	NBL1
COL5A2	0	1.14809	0.625	0.005	0	8	COL5A2	0	1.14809	0.625	0.005	0	8	COL5A2
COL4A11	0	1.11811	0.532	0.031	0	8	COL4A1	0	1.11811	0.532	0.031	0	8	COL4A1
GPX31	0	1.09949	0.539	0.167	0	8	GPX3	0	1.09949	0.539	0.167	0	8	GPX3
CTSK	0	1.08724	0.536	0.026	0	8	CTSK	0	1.08724	0.536	0.026	0	8	CTSK
SOD3	0	1.06513	0.599	0.025	0	8	SOD3	0	1.06513	0.599	0.025	0	8	SOD3
SERPINH1	0	1.03757	0.683	0.095	0	8	SERPINH1	0	1.03757	0.683	0.095	0	8	SERPINH1
MFGE8	0	1.03318	0.708	0.06	0	8	MFGE8	0	1.03318	0.708	0.06	0	8	MFGE8
LAPTM4A3	0	1.01226	0.936	0.527	0	8	LAPTM4A	0	1.01226	0.936	0.527	0	8	LAPTM4A
ID32	3.505788802e-314	1.01321	0.573	0.198	6.6981600846827e-310	8	ID3	5.90683e-289	1.01321	0.573	0.198	1.12856e-284	8	ID3
MT1E2	7.30343e-271	1.00255	0.643	0.219	1.39539e-266	8	MT1E	0	1.00255	0.643	0.219	0	8	MT1E
IGLC3	0	5.5732	0.666	0.19	0	9	IGLC3	0	5.5732	0.666	0.19	0	9	IGLC3	B & Plasma cells
IGHG1	0	5.26621	0.791	0.217	0	9	IGHG1	0	5.26621	0.791	0.217	0	9	IGHG1
IGKC	0	4.97853	0.973	0.7	0	9	IGKC	0	4.97853	0.973	0.7	0	9	IGKC
IGLC2	0	4.97399	0.74	0.321	0	9	IGLC2	0	4.97399	0.74	0.321	0	9	IGLC2
IGHG3	0	4.85844	0.799	0.282	0	9	IGHG3	0	4.85844	0.799	0.282	0	9	IGHG3
IGHA1	0	4.74319	0.832	0.362	0	9	IGHA1	0	4.74319	0.832	0.362	0	9	IGHA1
JCHAIN	0	4.38966	0.887	0.12	0	9	JCHAIN	0	4.38966	0.887	0.12	0	9	JCHAIN
IGHG2	0	4.0376	0.697	0.065	0	9	IGHG2	0	4.0376	0.697	0.065	0	9	IGHG2
IGHGP	0	3.9356	0.677	0.044	0	9	IGHGP	0	3.9356	0.677	0.044	0	9	IGHGP
IGHG41	0	3.84536	0.67	0.225	0	9	IGHG4	0	3.84536	0.67	0.225	0	9	IGHG4
MZB1	0	2.81552	0.983	0.084	0	9	MZB1	0	2.81552	0.983	0.084	0	9	MZB1
XBP11	0	1.8913	0.962	0.372	0	9	XBP1	0	1.8913	0.962	0.372	0	9	XBP1
DERL3	0	1.87211	0.919	0.031	0	9	DERL3	0	1.87211	0.919	0.031	0	9	DERL3
SSR4	0	1.69224	0.998	0.787	0	9	SSR4	0	1.69224	0.998	0.787	0	9	SSR4
FKBP11	0	1.63708	0.951	0.168	0	9	FKBP11	0	1.63708	0.951	0.168	0	9	FKBP11
CD79A1	0	1.36699	0.868	0.078	0	9	CD79A	0	1.36699	0.868	0.078	0	9	CD79A
SEC11C	0	1.23907	0.927	0.303	0	9	SEC11C	0	1.23907	0.927	0.303	0	9	SEC11C
HERPUD11	0	1.21169	0.948	0.485	0	9	HERPUD1	0	1.21169	0.948	0.485	0	9	HERPUD1
PRDX42	0	1.13892	0.903	0.234	0	9	PRDX4	0	1.13892	0.903	0.234	0	9	PRDX4
ITM2C	0	1.12072	0.848	0.147	0	9	ITM2C	0	1.12072	0.848	0.147	0	9	ITM2C
PIM2	0	1.07239	0.768	0.116	0	9	PIM2	0	1.07239	0.768	0.116	0	9	PIM2
CCL20	0	2.44306	0.578	0.091	0	10	CCL20	0	2.44306	0.578	0.091	0	10	CCL20	cancer cells
KRT193	0	2.3653	0.823	0.17	0	10	KRT19	0	2.3653	0.823	0.17	0	10	KRT19
HOPX1	0	2.08634	0.977	0.228	0	10	HOPX	0	2.08634	0.977	0.228	0	10	HOPX
CCND1	0	1.86944	0.819	0.077	0	10	CCND1	0	1.86944	0.819	0.077	0	10	CCND1
C19orf332	0	1.8452	0.889	0.098	0	10	C19orf33	0	1.8452	0.889	0.098	0	10	C19orf33
WFDC22	0	1.75309	0.755	0.149	0	10	WFDC2	0	1.75309	0.755	0.149	0	10	WFDC2
TFPI2	0	1.74111	0.6	0.119	0	10	TFPI	0	1.74111	0.6	0.119	0	10	TFPI
PAEP1	0	1.73364	0.605	0.079	0	10	PAEP	0	1.73364	0.605	0.079	0	10	PAEP
KRT73	0	1.72326	0.862	0.164	0	10	KRT7	0	1.72326	0.862	0.164	0	10	KRT7
KRT183	0	1.66497	0.898	0.189	0	10	KRT18	0	1.66497	0.898	0.189	0	10	KRT18
WSB11	0	1.6586	0.653	0.42	0	10	WSB1	5.89994e-173	1.6586	0.653	0.42	1.12724e-168	10	WSB1
KRT83	0	1.64446	0.887	0.158	0	10	KRT8	0	1.64446	0.887	0.158	0	10	KRT8
ANGPTL41	0	1.59924	0.541	0.084	0	10	ANGPTL4	0	1.59924	0.541	0.084	0	10	ANGPTL4
SPINK1	0	1.59184	0.52	0.066	0	10	SPINK1	0	1.59184	0.52	0.066	0	10	SPINK1
TNNC2	0	1.55323	0.568	0.015	0	10	TNNC2	0	1.55323	0.568	0.015	0	10	TNNC2
UBE2C	0	1.54618	0.662	0.068	0	10	UBE2C	0	1.54618	0.662	0.068	0	10	UBE2C
MIF1	0	1.42858	0.962	0.533	0	10	MIF	0	1.42858	0.962	0.533	0	10	MIF
AGR22	0	1.40391	0.787	0.117	0	10	AGR2	0	1.40391	0.787	0.117	0	10	AGR2
TXNDC171	0	1.38271	0.897	0.36	0	10	TXNDC17	0	1.38271	0.897	0.36	0	10	TXNDC17
VEGFA	0	1.35175	0.539	0.109	0	10	VEGFA	0	1.35175	0.539	0.109	0	10	VEGFA
PHLDA2	0	1.29595	0.732	0.127	0	10	PHLDA2	0	1.29595	0.732	0.127	0	10	PHLDA2
ERRFI11	0	1.28937	0.7	0.117	0	10	ERRFI1	0	1.28937	0.7	0.117	0	10	ERRFI1
SPINT23	0	1.24573	0.707	0.346	0	10	SPINT2	2.16414e-278	1.24573	0.707	0.346	4.1348e-274	10	SPINT2
C8orf43	0	1.22374	0.587	0.133	0	10	C8orf4	0	1.22374	0.587	0.133	0	10	C8orf4
MGST13	0	1.22102	0.932	0.281	0	10	MGST1	0	1.22102	0.932	0.281	0	10	MGST1
SFTA22	0	1.20636	0.832	0.14	0	10	SFTA2	0	1.20636	0.832	0.14	0	10	SFTA2
GPX41	0	1.20377	0.988	0.784	0	10	GPX4	0	1.20377	0.988	0.784	0	10	GPX4
BCAM2	0	1.16214	0.575	0.087	0	10	BCAM	0	1.16214	0.575	0.087	0	10	BCAM
NDRG1	0	1.13992	0.535	0.156	0	10	NDRG1	0	1.13992	0.535	0.156	0	10	NDRG1
ISG151	0	1.12385	0.875	0.432	0	10	ISG15	0	1.12385	0.875	0.432	0	10	ISG15
HMGB31	0	1.09889	0.747	0.124	0	10	HMGB3	0	1.09889	0.747	0.124	0	10	HMGB3
SNHG251	0	1.08135	0.687	0.173	0	10	SNHG25	0	1.08135	0.687	0.173	0	10	SNHG25
SRD5A3	0	1.07951	0.683	0.119	0	10	SRD5A3	0	1.07951	0.683	0.119	0	10	SRD5A3
S100A142	0	1.06865	0.658	0.1	0	10	S100A14	0	1.06865	0.658	0.1	0	10	S100A14
C16orf131	0	1.06339	0.877	0.294	0	10	C16orf13	0	1.06339	0.877	0.294	0	10	C16orf13
S100A163	0	1.05925	0.833	0.131	0	10	S100A16	0	1.05925	0.833	0.131	0	10	S100A16
TACSTD22	0	1.04943	0.721	0.12	0	10	TACSTD2	0	1.04943	0.721	0.12	0	10	TACSTD2
NQO12	0	1.04092	0.544	0.087	0	10	NQO1	0	1.04092	0.544	0.087	0	10	NQO1
GPRC5A2	0	1.0353	0.561	0.086	0	10	GPRC5A	0	1.0353	0.561	0.086	0	10	GPRC5A
EPCAM3	0	1.01009	0.703	0.14	0	10	EPCAM	0	1.01009	0.703	0.14	0	10	EPCAM
UQCR10	0	1.00947	0.961	0.664	0	10	UQCR10	0	1.00947	0.961	0.664	0	10	UQCR10
TPSAB1	0	5.25433	1	0.046	0	11	TPSAB1	0	5.25433	1	0.046	0	11	TPSAB1	Mast cells
TPSB2	0	5.24273	1	0.093	0	11	TPSB2	0	5.24273	1	0.093	0	11	TPSB2
CPA3	0	3.11406	0.981	0.013	0	11	CPA3	0	3.11406	0.981	0.013	0	11	CPA3
MS4A2	0	2.05309	0.946	0.003	0	11	MS4A2	0	2.05309	0.946	0.003	0	11	MS4A2
HPGDS	0	1.89696	0.944	0.025	0	11	HPGDS	0	1.89696	0.944	0.025	0	11	HPGDS
CLU	0	1.81439	0.918	0.108	0	11	CLU	0	1.81439	0.918	0.108	0	11	CLU
AREG2	0	1.60967	0.877	0.303	0	11	AREG	0	1.60967	0.877	0.303	0	11	AREG
HPGD1	0	1.55875	0.772	0.142	0	11	HPGD	0	1.55875	0.772	0.142	0	11	HPGD
LTC4S	0	1.48856	0.889	0.032	0	11	LTC4S	0	1.48856	0.889	0.032	0	11	LTC4S
RGS2	0	1.42087	0.917	0.34	0	11	RGS2	0	1.42087	0.917	0.34	0	11	RGS2
RGS12	0	1.38966	0.979	0.474	0	11	RGS1	0	1.38966	0.979	0.474	0	11	RGS1
GATA2	0	1.38897	0.831	0.012	0	11	GATA2	0	1.38897	0.831	0.012	0	11	GATA2
SLC18A2	0	1.32911	0.843	0.003	0	11	SLC18A2	0	1.32911	0.843	0.003	0	11	SLC18A2
KIT	0	1.32751	0.843	0.013	0	11	KIT	0	1.32751	0.843	0.013	0	11	KIT
SAMSN1	0	1.31566	0.938	0.319	0	11	SAMSN1	0	1.31566	0.938	0.319	0	11	SAMSN1
VWA5A	0	1.29137	0.866	0.04	0	11	VWA5A	0	1.29137	0.866	0.04	0	11	VWA5A
RGS13	0	1.27902	0.741	0.009	0	11	RGS13	0	1.27902	0.741	0.009	0	11	RGS13
C1orf186	0	1.17297	0.779	0.008	0	11	C1orf186	0	1.17297	0.779	0.008	0	11	C1orf186
LAPTM4A4	0	1.11901	0.96	0.531	0	11	LAPTM4A	0	1.11901	0.96	0.531	0	11	LAPTM4A
RP11-354E11.2	0	1.02606	0.74	0.002	0	11	RP11-354E11.2	0	1.02606	0.74	0.002	0	11	RP11-354E11.2
CD693	9.26866e-222	1.06313	0.865	0.361	1.77087e-217	11	CD69	8.38253e-227	1.06313	0.865	0.361	1.60157e-222	11	CD69
CAPS	0	3.36246	0.993	0.045	0	12	CAPS	0	3.36246	0.993	0.045	0	12	CAPS	Epithelial cells
TPPP3	0	3.29854	0.996	0.055	0	12	TPPP3	0	3.29854	0.996	0.055	0	12	TPPP3
TMEM190	0	3.15599	0.996	0.014	0	12	TMEM190	0	3.15599	0.996	0.014	0	12	TMEM190
C20orf85	0	2.78949	0.996	0.008	0	12	C20orf85	0	2.78949	0.996	0.008	0	12	C20orf85
C9orf24	0	2.78389	0.996	0.014	0	12	C9orf24	0	2.78389	0.996	0.014	0	12	C9orf24
FAM183A	0	2.36225	0.979	0.009	0	12	FAM183A	0	2.36225	0.979	0.009	0	12	FAM183A
AGR31	0	2.35368	0.979	0.066	0	12	AGR3	0	2.35368	0.979	0.066	0	12	AGR3
TSPAN11	0	2.34304	0.965	0.052	0	12	TSPAN1	0	2.34304	0.965	0.052	0	12	TSPAN1
C1orf194	0	2.23704	0.972	0.007	0	12	C1orf194	0	2.23704	0.972	0.007	0	12	C1orf194
RSPH1	0	2.16152	0.968	0.007	0	12	RSPH1	0	2.16152	0.968	0.007	0	12	RSPH1
CETN2	0	2.15084	0.989	0.165	0	12	CETN2	0	2.15084	0.989	0.165	0	12	CETN2
PIFO	0	2.08253	0.979	0.013	0	12	PIFO	0	2.08253	0.979	0.013	0	12	PIFO
GSTA1	0	2.08125	0.752	0.014	0	12	GSTA1	0	2.08125	0.752	0.014	0	12	GSTA1
PRDX53	0	2.07587	0.996	0.599	0	12	PRDX5	5.14332e-194	2.07587	0.996	0.599	9.82682e-190	12	PRDX5
MORN2	0	1.91868	0.979	0.085	0	12	MORN2	0	1.91868	0.979	0.085	0	12	MORN2
C5orf49	0	1.91268	0.975	0.008	0	12	C5orf49	0	1.91268	0.975	0.008	0	12	C5orf49
C11orf88	0	1.8902	0.933	0.004	0	12	C11orf88	0	1.8902	0.933	0.004	0	12	C11orf88
FXYD32	0	1.87335	0.954	0.119	0	12	FXYD3	0	1.87335	0.954	0.119	0	12	FXYD3
ODF3B	0	1.85615	0.961	0.179	0	12	ODF3B	0	1.85615	0.961	0.179	0	12	ODF3B
TUBB4B2	0	1.82598	0.947	0.378	0	12	TUBB4B	2.40553e-185	1.82598	0.947	0.378	4.59601e-181	12	TUBB4B
C9orf116	0	1.8254	0.943	0.013	0	12	C9orf116	0	1.8254	0.943	0.013	0	12	C9orf116
SNTN	0	1.79548	0.954	0.003	0	12	SNTN	0	1.79548	0.954	0.003	0	12	SNTN
DYNLRB2	0	1.73522	0.961	0.006	0	12	DYNLRB2	0	1.73522	0.961	0.006	0	12	DYNLRB2
GSTP11	0	1.72581	1	0.792	0	12	GSTP1	1.67663e-172	1.72581	1	0.792	3.20337e-168	12	GSTP1
OMG	0	1.70859	0.801	0.008	0	12	OMG	0	1.70859	0.801	0.008	0	12	OMG
LRRIQ1	0	1.66914	0.936	0.008	0	12	LRRIQ1	0	1.66914	0.936	0.008	0	12	LRRIQ1
PSENEN	0	1.64122	0.936	0.279	0	12	PSENEN	6.75542e-235	1.64122	0.936	0.279	1.29069e-230	12	PSENEN
CAPSL	0	1.63072	0.904	0.002	0	12	CAPSL	0	1.63072	0.904	0.002	0	12	CAPSL
SMIM222	0	1.60688	0.936	0.104	0	12	SMIM22	0	1.60688	0.936	0.104	0	12	SMIM22
C2orf40	0	1.59614	0.759	0.006	0	12	C2orf40	0	1.59614	0.759	0.006	0	12	C2orf40
MS4A8	0	1.56299	0.911	0.003	0	12	MS4A8	0	1.56299	0.911	0.003	0	12	MS4A8
HMGN32	0	1.55292	0.986	0.42	0	12	HMGN3	3.92323e-208	1.55292	0.986	0.42	7.49572e-204	12	HMGN3
DNAAF1	0	1.54046	0.901	0.016	0	12	DNAAF1	0	1.54046	0.901	0.016	0	12	DNAAF1
ZMYND10	0	1.52103	0.908	0.005	0	12	ZMYND10	0	1.52103	0.908	0.005	0	12	ZMYND10
DYNLL11	0	1.51778	0.989	0.746	0	12	DYNLL1	1.85834e-162	1.51778	0.989	0.746	3.55054e-158	12	DYNLL1
FOXJ1	0	1.48844	0.918	0.011	0	12	FOXJ1	0	1.48844	0.918	0.011	0	12	FOXJ1
RP11-356K23.1	0	1.48644	0.844	0.002	0	12	RP11-356K23.1	0	1.48644	0.844	0.002	0	12	RP11-356K23.1
CCDC78	0	1.48345	0.897	0.006	0	12	CCDC78	0	1.48345	0.897	0.006	0	12	CCDC78
CD594	0	1.48094	0.965	0.421	0	12	CD59	6.52428e-177	1.48094	0.965	0.421	1.24653e-172	12	CD59
MORN5	0	1.47375	0.901	0.003	0	12	MORN5	0	1.47375	0.901	0.003	0	12	MORN5
FAM229B	0	1.45748	0.904	0.035	0	12	FAM229B	0	1.45748	0.904	0.035	0	12	FAM229B
CFAP126	0	1.45264	0.872	0.003	0	12	CFAP126	0	1.45264	0.872	0.003	0	12	CFAP126
MRPS31	0	1.39819	0.911	0.097	0	12	MRPS31	0	1.39819	0.911	0.097	0	12	MRPS31
AC013264.2	0	1.36836	0.876	0.016	0	12	AC013264.2	0	1.36836	0.876	0.016	0	12	AC013264.2
SRI2	0	1.34558	0.972	0.452	0	12	SRI	9.09048e-180	1.34558	0.972	0.452	1.73683e-175	12	SRI
FAM92B	0	1.34523	0.883	0.006	0	12	FAM92B	0	1.34523	0.883	0.006	0	12	FAM92B
ATPIF11	0	1.33859	0.972	0.521	0	12	ATPIF1	1.36166e-161	1.33859	0.972	0.521	2.60158e-157	12	ATPIF1
CYSTM11	0	1.31965	0.943	0.273	0	12	CYSTM1	8.26675e-230	1.31965	0.943	0.273	1.57945e-225	12	CYSTM1
FABP6	0	1.31674	0.748	0.003	0	12	FABP6	0	1.31674	0.748	0.003	0	12	FABP6
RP11-295M3.4	0	1.31476	0.784	0.003	0	12	RP11-295M3.4	0	1.31476	0.784	0.003	0	12	RP11-295M3.4
CCDC170	0	1.30636	0.848	0.015	0	12	CCDC170	0	1.30636	0.848	0.015	0	12	CCDC170
CIB11	0	1.30562	0.979	0.598	0	12	CIB1	5.32794e-167	1.30562	0.979	0.598	1.01796e-162	12	CIB1
IFT571	0	1.30303	0.904	0.132	0	12	IFT57	0	1.30303	0.904	0.132	0	12	IFT57
TSPAN19	0	1.30041	0.805	0.002	0	12	TSPAN19	0	1.30041	0.805	0.002	0	12	TSPAN19
ALDH1A1	0	1.29402	0.879	0.145	0	12	ALDH1A1	0	1.29402	0.879	0.145	0	12	ALDH1A1
EZR2	0	1.29158	0.947	0.417	0	12	EZR	1.07823e-166	1.29158	0.947	0.417	2.06007e-162	12	EZR
EFHC1	0	1.28921	0.876	0.045	0	12	EFHC1	0	1.28921	0.876	0.045	0	12	EFHC1
WDR54	0	1.28516	0.922	0.088	0	12	WDR54	0	1.28516	0.922	0.088	0	12	WDR54
TMC5	0	1.27895	0.862	0.059	0	12	TMC5	0	1.27895	0.862	0.059	0	12	TMC5
UFC12	0	1.26292	0.947	0.446	0	12	UFC1	2.01873e-163	1.26292	0.947	0.446	3.85699e-159	12	UFC1
CCDC146	0	1.26148	0.851	0.018	0	12	CCDC146	0	1.26148	0.851	0.018	0	12	CCDC146
KIF9	0	1.26129	0.855	0.041	0	12	KIF9	0	1.26129	0.855	0.041	0	12	KIF9
ROPN1L	0	1.26046	0.851	0.003	0	12	ROPN1L	0	1.26046	0.851	0.003	0	12	ROPN1L
SLC44A4	0	1.25881	0.816	0.029	0	12	SLC44A4	0	1.25881	0.816	0.029	0	12	SLC44A4
TCTEX1D2	0	1.24508	0.851	0.058	0	12	TCTEX1D2	0	1.24508	0.851	0.058	0	12	TCTEX1D2
DNALI1	0	1.24389	0.833	0.019	0	12	DNALI1	0	1.24389	0.833	0.019	0	12	DNALI1
WDR38	0	1.23913	0.833	0.001	0	12	WDR38	0	1.23913	0.833	0.001	0	12	WDR38
CFAP53	0	1.23517	0.823	0.003	0	12	CFAP53	0	1.23517	0.823	0.003	0	12	CFAP53
C9orf135	0	1.21165	0.876	0.002	0	12	C9orf135	0	1.21165	0.876	0.002	0	12	C9orf135
LRRC23	0	1.19141	0.858	0.05	0	12	LRRC23	0	1.19141	0.858	0.05	0	12	LRRC23
HSBP12	0	1.18707	0.961	0.462	0	12	HSBP1	1.75705e-164	1.18707	0.961	0.462	3.35702e-160	12	HSBP1
TEKT1	0	1.17815	0.844	0.002	0	12	TEKT1	0	1.17815	0.844	0.002	0	12	TEKT1
EFCAB1	0	1.1769	0.887	0.002	0	12	EFCAB1	0	1.1769	0.887	0.002	0	12	EFCAB1
C11orf97	0	1.17327	0.83	0.002	0	12	C11orf97	0	1.17327	0.83	0.002	0	12	C11orf97
LDLRAD1	0	1.16651	0.748	0.005	0	12	LDLRAD1	0	1.16651	0.748	0.005	0	12	LDLRAD1
RSPH9	0	1.15095	0.816	0.004	0	12	RSPH9	0	1.15095	0.816	0.004	0	12	RSPH9
LRRC46	0	1.15072	0.801	0.003	0	12	LRRC46	0	1.15072	0.801	0.003	0	12	LRRC46
DPCD	0	1.14534	0.876	0.061	0	12	DPCD	0	1.14534	0.876	0.061	0	12	DPCD
AKAP91	0	1.14385	0.894	0.264	0	12	AKAP9	7.9677e-195	1.14385	0.894	0.264	1.52231e-190	12	AKAP9
FAM216B	0	1.14002	0.837	0.001	0	12	FAM216B	0	1.14002	0.837	0.001	0	12	FAM216B
METTL7A	0	1.11625	0.826	0.105	0	12	METTL7A	0	1.11625	0.826	0.105	0	12	METTL7A
IK1	0	1.10981	0.911	0.271	0	12	IK	5.34253e-202	1.10981	0.911	0.271	1.02074e-197	12	IK
POLR2I2	0	1.10786	0.869	0.301	0	12	POLR2I	1.15478e-164	1.10786	0.869	0.301	2.20632e-160	12	POLR2I
NME5	0	1.0864	0.819	0.005	0	12	NME5	0	1.0864	0.819	0.005	0	12	NME5
IFT27	0	1.08311	0.865	0.099	0	12	IFT27	0	1.08311	0.865	0.099	0	12	IFT27
DRC3	0	1.08254	0.823	0.006	0	12	DRC3	0	1.08254	0.823	0.006	0	12	DRC3
SPAG6	0	1.08103	0.809	0.004	0	12	SPAG6	0	1.08103	0.809	0.004	0	12	SPAG6
CHST9	0	1.07564	0.809	0.002	0	12	CHST9	0	1.07564	0.809	0.002	0	12	CHST9
FAM166B	0	1.07499	0.816	0.006	0	12	FAM166B	0	1.07499	0.816	0.006	0	12	FAM166B
CDHR3	0	1.06978	0.762	0.005	0	12	CDHR3	0	1.06978	0.762	0.005	0	12	CDHR3
CFAP157	0	1.06971	0.809	0.002	0	12	CFAP157	0	1.06971	0.809	0.002	0	12	CFAP157
SPA17	0	1.06764	0.762	0.024	0	12	SPA17	0	1.06764	0.762	0.024	0	12	SPA17
CDS1	0	1.0621	0.762	0.032	0	12	CDS1	0	1.0621	0.762	0.032	0	12	CDS1
FAM174A	0	1.03731	0.865	0.086	0	12	FAM174A	0	1.03731	0.865	0.086	0	12	FAM174A
NUDC1	0	1.03477	0.904	0.336	0	12	NUDC	1.66651e-161	1.03477	0.904	0.336	3.18404e-157	12	NUDC
DNAH12	0	1.03429	0.734	0.001	0	12	DNAH12	0	1.03429	0.734	0.001	0	12	DNAH12
CATSPERD	0	1.02517	0.755	0.001	0	12	CATSPERD	0	1.02517	0.755	0.001	0	12	CATSPERD
DNAH5	0	1.01938	0.762	0.01	0	12	DNAH5	0	1.01938	0.762	0.01	0	12	DNAH5
CCDC17	0	1.01862	0.784	0.004	0	12	CCDC17	0	1.01862	0.784	0.004	0	12	CCDC17
DYDC2	0	1.00094	0.748	0.002	0	12	DYDC2	0	1.00094	0.748	0.002	0	12	DYDC2
DYNLT12	6.49e-321	1.16897	0.957	0.453	1.24036584e-316	12	DYNLT1	1.94856e-155	1.16897	0.957	0.453	3.72291e-151	12	DYNLT1
TSTD13	8.024e-321	1.16841	0.947	0.358	1.532994e-316	12	TSTD1	3.09855e-178	1.16841	0.947	0.358	5.92008e-174	12	TSTD1
IGFBP2	1.3923e-320	1.1944	0.805	0.036	2.6600844e-316	12	IGFBP2	0	1.1944	0.805	0.036	0	12	IGFBP2
MLF11	8.92491e-303	1.01881	0.809	0.062	1.70519e-298	12	MLF1	0	1.01881	0.809	0.062	0	12	MLF1
DMKN2	1.18634e-300	1.06646	0.858	0.065	2.26663e-296	12	DMKN	0	1.06646	0.858	0.065	0	12	DMKN
PCSK1N	5.5712e-297	1.36338	0.677	0.024	1.06443e-292	12	PCSK1N	0	1.36338	0.677	0.024	0	12	PCSK1N
CYP4B1	1.14784e-293	1.45569	0.833	0.034	2.19307e-289	12	CYP4B1	0	1.45569	0.833	0.034	0	12	CYP4B1
CP	1.57008e-275	1.1524	0.784	0.03	2.9998e-271	12	CP	0	1.1524	0.784	0.03	0	12	CP
IGFBP72	2.57528e-262	1.89017	0.965	0.144	4.92032e-258	12	IGFBP7	0	1.89017	0.965	0.144	0	12	IGFBP7
CD243	2.3179e-261	1.52381	0.89	0.111	4.42859e-257	12	CD24	0	1.52381	0.89	0.111	0	12	CD24
WFDC23	2.9998e-260	1.91836	0.954	0.159	5.73141e-256	12	WFDC2	0	1.91836	0.954	0.159	0	12	WFDC2
CKB3	4.0909e-255	1.31108	0.865	0.111	7.81607e-251	12	CKB	0	1.31108	0.865	0.111	0	12	CKB
PIP	4.61657e-254	1.19604	0.532	0.005	8.82041e-250	12	PIP	0	1.19604	0.532	0.005	0	12	PIP
C12orf751	1.54941e-252	1.22155	0.922	0.179	2.96031e-248	12	C12orf75	5.67896e-284	1.22155	0.922	0.179	1.08502e-279	12	C12orf75
CTGF1	5.80074e-250	1.51227	0.819	0.048	1.10829e-245	12	CTGF	0	1.51227	0.819	0.048	0	12	CTGF
PLPP23	5.65917e-240	1.03627	0.855	0.079	1.08124e-235	12	PLPP2	0	1.03627	0.855	0.079	0	12	PLPP2
SEPW12	8.44735e-238	1.01928	0.947	0.444	1.61395e-233	12	SEPW1	1.06093e-143	1.01928	0.947	0.444	2.027e-139	12	SEPW1
ELF34	3.63322e-229	1.47557	0.926	0.126	6.94163e-225	12	ELF3	0	1.47557	0.926	0.126	0	12	ELF3
PIGR	9.04878e-225	1.29574	0.738	0.041	1.72886e-220	12	PIGR	0	1.29574	0.738	0.041	0	12	PIGR
SYT8	1.55112e-220	1.09515	0.599	0.021	2.96358e-216	12	SYT8	0	1.09515	0.599	0.021	0	12	SYT8
SLPI2	2.48697e-206	1.81508	0.936	0.227	4.75161e-202	12	SLPI	2.04443e-234	1.81508	0.936	0.227	3.9061e-230	12	SLPI
AGR23	2.30976e-204	1.36341	0.894	0.128	4.41303e-200	12	AGR2	0	1.36341	0.894	0.128	0	12	AGR2
CLU1	3.4794e-200	1.3083	0.865	0.116	6.64774e-196	12	CLU	0	1.3083	0.865	0.116	0	12	CLU
TUBA1A2	7.29173e-193	1.27955	0.901	0.38	1.39316e-188	12	TUBA1A	2.82247e-135	1.27955	0.901	0.38	5.39261e-131	12	TUBA1A
SLC34A21	5.9835e-192	1.01001	0.773	0.066	1.14321e-187	12	SLC34A2	0	1.01001	0.773	0.066	0	12	SLC34A2
CST6	4.54749e-188	1.02894	0.734	0.065	8.68844e-184	12	CST6	0	1.02894	0.734	0.065	0	12	CST6
DSTN6	1.04369e-183	1.07541	0.957	0.47	1.99407e-179	12	DSTN	1.58106e-140	1.07541	0.957	0.47	3.02077e-136	12	DSTN
APOD	1.43596e-180	1.1257	0.645	0.046	2.74355e-176	12	APOD	0	1.1257	0.645	0.046	0	12	APOD
PLAC8	1.51495e-175	1.14769	0.887	0.18	2.89446e-171	12	PLAC8	3.19772e-239	1.14769	0.887	0.18	6.10957e-235	12	PLAC8
CLDN44	5.70041e-170	1.17455	0.84	0.124	1.08912e-165	12	CLDN4	1.63134e-299	1.17455	0.84	0.124	3.11684e-295	12	CLDN4
CLDN32	1.05392e-160	1.02651	0.713	0.077	2.01361e-156	12	CLDN3	0	1.02651	0.713	0.077	0	12	CLDN3
GSN3	3.16184e-146	1.16035	0.826	0.31	6.04102e-142	12	GSN	9.72309e-116	1.16035	0.826	0.31	1.85769e-111	12	GSN
KRT84	4.93691e-143	1.00418	0.862	0.171	9.43246e-139	12	KRT8	6.53996e-220	1.00418	0.862	0.171	1.24952e-215	12	KRT8
SCGB1A1	1.8027e-117	2.75398	0.67	0.17	3.44423e-113	12	SCGB1A1	8.11287e-128	2.75398	0.67	0.17	1.55004e-123	12	SCGB1A1
SCGB3A11	1.62045e-74	2.42416	0.606	0.182	3.09604e-70	12	SCGB3A1	9.088e-87	2.42416	0.606	0.182	1.73635e-82	12	SCGB3A1

## Sheet: 1-5
Table 1-5. The DEGs for each cluster in OV
	p_val_mast	avg_logFC_mast	pct.1_mast	pct.2_mast	p_val_adj_mast	cluster_mast	gene_mast	p_val_wilcox	avg_logFC_wilcox	pct.1_wilcox	pct.2_wilcox	p_val_adj_wilcox	cluster_wilcox	gene_wilcox
DCN	0	2.81486	0.971	0.411	0	0	DCN	0	2.81486	0.971	0.411	0	0	DCN	Fibroblast cells
COL1A1	0	2.44807	0.821	0.532	0	0	COL1A1	0	2.44807	0.821	0.532	0	0	COL1A1
COL3A1	0	2.21947	0.681	0.407	0	0	COL3A1	0	2.21947	0.681	0.407	0	0	COL3A1
COL1A2	0	2.14385	0.862	0.578	0	0	COL1A2	0	2.14385	0.862	0.578	0	0	COL1A2
LUM	0	2.08708	0.743	0.275	0	0	LUM	0	2.08708	0.743	0.275	0	0	LUM
CCDC80	0	1.76196	0.726	0.171	0	0	CCDC80	0	1.76196	0.726	0.171	0	0	CCDC80
MGP	0	1.74155	0.788	0.383	0	0	MGP	0	1.74155	0.788	0.383	0	0	MGP
C1S	0	1.70573	0.913	0.107	0	0	C1S	0	1.70573	0.913	0.107	0	0	C1S
C1R	0	1.64363	0.856	0.132	0	0	C1R	0	1.64363	0.856	0.132	0	0	C1R
SPARC	0	1.59679	0.853	0.558	0	0	SPARC	0	1.59679	0.853	0.558	0	0	SPARC
MEG3	0	1.57582	0.781	0.036	0	0	MEG3	0	1.57582	0.781	0.036	0	0	MEG3
CYR61	0	1.50126	0.56	0.158	0	0	CYR61	0	1.50126	0.56	0.158	0	0	CYR61
GSN	0	1.49253	0.719	0.45	0	0	GSN	0	1.49253	0.719	0.45	0	0	GSN
RARRES2	0	1.48374	0.951	0.376	0	0	RARRES2	0	1.48374	0.951	0.376	0	0	RARRES2
IGFBP6	0	1.46783	0.635	0.175	0	0	IGFBP6	0	1.46783	0.635	0.175	0	0	IGFBP6
SERPINF1	0	1.42883	0.756	0.202	0	0	SERPINF1	0	1.42883	0.756	0.202	0	0	SERPINF1
C3	0	1.32287	0.557	0.212	0	0	C3	0	1.32287	0.557	0.212	0	0	C3
IGFBP5	0	1.30136	0.788	0.378	0	0	IGFBP5	0	1.30136	0.788	0.378	0	0	IGFBP5
SERPING1	0	1.29213	0.902	0.325	0	0	SERPING1	0	1.29213	0.902	0.325	0	0	SERPING1
COL6A2	0	1.26956	0.803	0.22	0	0	COL6A2	0	1.26956	0.803	0.22	0	0	COL6A2
RARRES1	0	1.26094	0.508	0.096	0	0	RARRES1	0	1.26094	0.508	0.096	0	0	RARRES1
FBLN1	0	1.16611	0.584	0.142	0	0	FBLN1	0	1.16611	0.584	0.142	0	0	FBLN1
COL6A1	0	1.10663	0.746	0.201	0	0	COL6A1	0	1.10663	0.746	0.201	0	0	COL6A1
NNMT	0	1.09092	0.639	0.227	0	0	NNMT	0	1.09092	0.639	0.227	0	0	NNMT
EFEMP1	0	1.06584	0.624	0.055	0	0	EFEMP1	0	1.06584	0.624	0.055	0	0	EFEMP1
COL6A3	0	1.04838	0.562	0.099	0	0	COL6A3	0	1.04838	0.562	0.099	0	0	COL6A3
MT1E	0	1.01871	0.631	0.276	0	0	MT1E	0	1.01871	0.631	0.276	0	0	MT1E
AEBP1	0	1.01117	0.658	0.15	0	0	AEBP1	0	1.01117	0.658	0.15	0	0	AEBP1
MFAP4	0	0.988713	0.606	0.144	0	0	MFAP4	0	0.988713	0.606	0.144	0	0	MFAP4
MMP2	0	0.970011	0.649	0.188	0	0	MMP2	0	0.970011	0.649	0.188	0	0	MMP2
NBL1	0	0.956794	0.686	0.123	0	0	NBL1	0	0.956794	0.686	0.123	0	0	NBL1
EGR1	0	0.948533	0.73	0.384	0	0	EGR1	0	0.948533	0.73	0.384	0	0	EGR1
SEPP1	0	0.936653	0.872	0.371	0	0	SEPP1	0	0.936653	0.872	0.371	0	0	SEPP1
PCOLCE	0	0.89484	0.575	0.172	0	0	PCOLCE	0	0.89484	0.575	0.172	0	0	PCOLCE
CALD1	0	0.894372	0.965	0.536	0	0	CALD1	0	0.894372	0.965	0.536	0	0	CALD1
NR4A1	0	0.809268	0.603	0.216	0	0	NR4A1	0	0.809268	0.603	0.216	0	0	NR4A1
FSTL1	0	0.797222	0.56	0.179	0	0	FSTL1	0	0.797222	0.56	0.179	0	0	FSTL1
OLFML3	0	0.795392	0.602	0.096	0	0	OLFML3	0	0.795392	0.602	0.096	0	0	OLFML3
LGALS3BP	0	0.780107	0.765	0.29	0	0	LGALS3BP	0	0.780107	0.765	0.29	0	0	LGALS3BP
CPE	0	0.759162	0.57	0.118	0	0	CPE	0	0.759162	0.57	0.118	0	0	CPE
LAPTM4A	0	0.734845	0.955	0.733	0	0	LAPTM4A	0	0.734845	0.955	0.733	0	0	LAPTM4A
SELM	0	0.682429	0.837	0.259	0	0	SELM	0	0.682429	0.837	0.259	0	0	SELM
ISLR	0	0.678235	0.525	0.115	0	0	ISLR	0	0.678235	0.525	0.115	0	0	ISLR
BST2	0	0.676864	0.758	0.46	0	0	BST2	0	0.676864	0.758	0.46	0	0	BST2
CFH	0	0.652772	0.573	0.102	0	0	CFH	0	0.652772	0.573	0.102	0	0	CFH
PDGFRA	0	0.648738	0.538	0.028	0	0	PDGFRA	0	0.648738	0.538	0.028	0	0	PDGFRA
TIMP2	0	0.640698	0.708	0.272	0	0	TIMP2	0	0.640698	0.708	0.272	0	0	TIMP2
ARID5B	0	0.637462	0.653	0.26	0	0	ARID5B	0	0.637462	0.653	0.26	0	0	ARID5B
TCEAL4	0	0.631526	0.709	0.395	0	0	TCEAL4	0	0.631526	0.709	0.395	0	0	TCEAL4
RBP1	0	0.6286	0.626	0.402	0	0	RBP1	0	0.6286	0.626	0.402	0	0	RBP1
WBP5	0	0.614449	0.786	0.366	0	0	WBP5	0	0.614449	0.786	0.366	0	0	WBP5
EFEMP2	0	0.602244	0.608	0.137	0	0	EFEMP2	0	0.602244	0.608	0.137	0	0	EFEMP2
TMEM98	0	0.593165	0.67	0.192	0	0	TMEM98	0	0.593165	0.67	0.192	0	0	TMEM98
MXRA8	0	0.589247	0.539	0.111	0	0	MXRA8	0	0.589247	0.539	0.111	0	0	MXRA8
CTSF	0	0.566109	0.557	0.127	0	0	CTSF	0	0.566109	0.557	0.127	0	0	CTSF
CD99	0	0.559841	0.837	0.511	0	0	CD99	0	0.559841	0.837	0.511	0	0	CD99
SERPINH1	0	0.550954	0.531	0.202	0	0	SERPINH1	0	0.550954	0.531	0.202	0	0	SERPINH1
CNN3	0	0.544553	0.719	0.293	0	0	CNN3	0	0.544553	0.719	0.293	0	0	CNN3
EPHX1	0	0.537069	0.548	0.168	0	0	EPHX1	0	0.537069	0.548	0.168	0	0	EPHX1
ID3	0	0.536663	0.576	0.316	0	0	ID3	0	0.536663	0.576	0.316	0	0	ID3
GSTM3	0	0.534273	0.512	0.127	0	0	GSTM3	0	0.534273	0.512	0.127	0	0	GSTM3
LRP1	0	0.530588	0.58	0.183	0	0	LRP1	0	0.530588	0.58	0.183	0	0	LRP1
SPARCL1	0	0.518395	0.641	0.2	0	0	SPARCL1	0	0.518395	0.641	0.2	0	0	SPARCL1
MDK	0	0.517371	0.815	0.557	0	0	MDK	0	0.517371	0.815	0.557	0	0	MDK
PMP22	0	0.506755	0.549	0.177	0	0	PMP22	0	0.506755	0.549	0.177	0	0	PMP22
FOSB	0	0.50207	0.657	0.449	0	0	FOSB	1.13411e-303	0.50207	0.657	0.449	2.11704e-299	0	FOSB
HLA-DRA	0	3.03513	0.995	0.396	0	1	HLA-DRA	0	3.03513	0.995	0.396	0	1	HLA-DRA	Myeloid cells
C1QB	0	2.83261	0.748	0.106	0	1	C1QB	0	2.83261	0.748	0.106	0	1	C1QB
CD74	0	2.72126	0.998	0.626	0	1	CD74	0	2.72126	0.998	0.626	0	1	CD74
HLA-DPB1	0	2.71875	0.963	0.283	0	1	HLA-DPB1	0	2.71875	0.963	0.283	0	1	HLA-DPB1
C1QA	0	2.70107	0.771	0.098	0	1	C1QA	0	2.70107	0.771	0.098	0	1	C1QA
HLA-DPA1	0	2.65781	0.957	0.261	0	1	HLA-DPA1	0	2.65781	0.957	0.261	0	1	HLA-DPA1
LYZ	0	2.65393	0.851	0.046	0	1	LYZ	0	2.65393	0.851	0.046	0	1	LYZ
TYROBP	0	2.61886	0.995	0.12	0	1	TYROBP	0	2.61886	0.995	0.12	0	1	TYROBP
HLA-DRB1	0	2.57707	0.967	0.279	0	1	HLA-DRB1	0	2.57707	0.967	0.279	0	1	HLA-DRB1
C1QC	0	2.17801	0.692	0.04	0	1	C1QC	0	2.17801	0.692	0.04	0	1	C1QC
AIF1	0	2.17267	0.973	0.059	0	1	AIF1	0	2.17267	0.973	0.059	0	1	AIF1
FCER1G	0	2.08294	0.973	0.085	0	1	FCER1G	0	2.08294	0.973	0.085	0	1	FCER1G
APOC1	0	2.00348	0.591	0.147	0	1	APOC1	0	2.00348	0.591	0.147	0	1	APOC1
HLA-DQA1	0	1.9679	0.787	0.078	0	1	HLA-DQA1	0	1.9679	0.787	0.078	0	1	HLA-DQA1
SRGN	0	1.92035	0.986	0.277	0	1	SRGN	0	1.92035	0.986	0.277	0	1	SRGN
MS4A6A	0	1.86531	0.877	0.034	0	1	MS4A6A	0	1.86531	0.877	0.034	0	1	MS4A6A
S100A9	0	1.84728	0.566	0.087	0	1	S100A9	0	1.84728	0.566	0.087	0	1	S100A9
RGS1	0	1.82543	0.781	0.119	0	1	RGS1	0	1.82543	0.781	0.119	0	1	RGS1
HLA-DRB5	0	1.81709	0.742	0.119	0	1	HLA-DRB5	0	1.81709	0.742	0.119	0	1	HLA-DRB5
HLA-DQB1	0	1.75479	0.793	0.135	0	1	HLA-DQB1	0	1.75479	0.793	0.135	0	1	HLA-DQB1
APOE	0	1.7328	0.648	0.381	0	1	APOE	0	1.7328	0.648	0.381	0	1	APOE
CD14	0	1.6555	0.775	0.057	0	1	CD14	0	1.6555	0.775	0.057	0	1	CD14
CTSS	0	1.59965	0.88	0.086	0	1	CTSS	0	1.59965	0.88	0.086	0	1	CTSS
GPX1	0	1.59267	0.992	0.73	0	1	GPX1	0	1.59267	0.992	0.73	0	1	GPX1
LAPTM5	0	1.56886	0.95	0.139	0	1	LAPTM5	0	1.56886	0.95	0.139	0	1	LAPTM5
HLA-DMA	0	1.54861	0.868	0.127	0	1	HLA-DMA	0	1.54861	0.868	0.127	0	1	HLA-DMA
MS4A7	0	1.52255	0.825	0.02	0	1	MS4A7	0	1.52255	0.825	0.02	0	1	MS4A7
LST1	0	1.50322	0.867	0.04	0	1	LST1	0	1.50322	0.867	0.04	0	1	LST1
CD68	0	1.50084	0.851	0.067	0	1	CD68	0	1.50084	0.851	0.067	0	1	CD68
CTSB	0	1.47676	0.93	0.525	0	1	CTSB	0	1.47676	0.93	0.525	0	1	CTSB
C1orf162	0	1.45708	0.823	0.045	0	1	C1orf162	0	1.45708	0.823	0.045	0	1	C1orf162
CTSD	0	1.37703	0.785	0.374	0	1	CTSD	0	1.37703	0.785	0.374	0	1	CTSD
FCGR3A	0	1.29404	0.661	0.031	0	1	FCGR3A	0	1.29404	0.661	0.031	0	1	FCGR3A
RGS2	0	1.2506	0.727	0.208	0	1	RGS2	0	1.2506	0.727	0.208	0	1	RGS2
TYMP	0	1.2506	0.84	0.197	0	1	TYMP	0	1.2506	0.84	0.197	0	1	TYMP
HLA-DMB	0	1.17673	0.755	0.096	0	1	HLA-DMB	0	1.17673	0.755	0.096	0	1	HLA-DMB
CYBA	0	1.13463	0.987	0.644	0	1	CYBA	0	1.13463	0.987	0.644	0	1	CYBA
GRN	0	1.10964	0.899	0.428	0	1	GRN	0	1.10964	0.899	0.428	0	1	GRN
ITGB2	0	1.10048	0.799	0.092	0	1	ITGB2	0	1.10048	0.799	0.092	0	1	ITGB2
RNASE6	0	1.08434	0.707	0.026	0	1	RNASE6	0	1.08434	0.707	0.026	0	1	RNASE6
VSIG4	0	1.08136	0.597	0.015	0	1	VSIG4	0	1.08136	0.597	0.015	0	1	VSIG4
VAMP8	0	1.08066	0.898	0.301	0	1	VAMP8	0	1.08066	0.898	0.301	0	1	VAMP8
SPI1	0	1.05329	0.744	0.02	0	1	SPI1	0	1.05329	0.744	0.02	0	1	SPI1
CD163	0	1.03757	0.61	0.014	0	1	CD163	0	1.03757	0.61	0.014	0	1	CD163
HERPUD1	0	1.0211	0.792	0.447	0	1	HERPUD1	0	1.0211	0.792	0.447	0	1	HERPUD1
MAFB	0	1.01525	0.705	0.168	0	1	MAFB	0	1.01525	0.705	0.168	0	1	MAFB
RNASET2	0	1.01213	0.833	0.329	0	1	RNASET2	0	1.01213	0.833	0.329	0	1	RNASET2
SERPINA1	0	1.00809	0.679	0.065	0	1	SERPINA1	0	1.00809	0.679	0.065	0	1	SERPINA1
GPR183	0	1.00247	0.556	0.047	0	1	GPR183	0	1.00247	0.556	0.047	0	1	GPR183
CTSZ	0	0.982824	0.722	0.235	0	1	CTSZ	0	0.982824	0.722	0.235	0	1	CTSZ
PLAUR	0	0.954869	0.645	0.129	0	1	PLAUR	0	0.954869	0.645	0.129	0	1	PLAUR
ALOX5AP	0	0.923455	0.536	0.113	0	1	ALOX5AP	0	0.923455	0.536	0.113	0	1	ALOX5AP
SH3BGRL3	0	0.919479	0.97	0.691	0	1	SH3BGRL3	0	0.919479	0.97	0.691	0	1	SH3BGRL3
MNDA	0	0.901853	0.597	0.015	0	1	MNDA	0	0.901853	0.597	0.015	0	1	MNDA
FAM26F	0	0.881964	0.579	0.028	0	1	FAM26F	0	0.881964	0.579	0.028	0	1	FAM26F
MS4A4A	0	0.875281	0.547	0.014	0	1	MS4A4A	0	0.875281	0.547	0.014	0	1	MS4A4A
FYB	0	0.867763	0.706	0.084	0	1	FYB	0	0.867763	0.706	0.084	0	1	FYB
FCGR2A	0	0.860737	0.642	0.04	0	1	FCGR2A	0	0.860737	0.642	0.04	0	1	FCGR2A
COTL1	0	0.857179	0.728	0.222	0	1	COTL1	0	0.857179	0.728	0.222	0	1	COTL1
SGK1	0	0.855699	0.654	0.201	0	1	SGK1	0	0.855699	0.654	0.201	0	1	SGK1
LIPA	0	0.853909	0.557	0.132	0	1	LIPA	0	0.853909	0.557	0.132	0	1	LIPA
ARHGDIB	0	0.828746	0.863	0.255	0	1	ARHGDIB	0	0.828746	0.863	0.255	0	1	ARHGDIB
S100A4	0	0.821631	0.851	0.43	0	1	S100A4	0	0.821631	0.851	0.43	0	1	S100A4
LY96	0	0.820442	0.689	0.128	0	1	LY96	0	0.820442	0.689	0.128	0	1	LY96
CXCL16	0	0.820384	0.63	0.077	0	1	CXCL16	0	0.820384	0.63	0.077	0	1	CXCL16
SAMSN1	0	0.820344	0.581	0.052	0	1	SAMSN1	0	0.820344	0.581	0.052	0	1	SAMSN1
FCGRT	0	0.810105	0.896	0.577	0	1	FCGRT	0	0.810105	0.896	0.577	0	1	FCGRT
AP1S2	0	0.798476	0.7	0.191	0	1	AP1S2	0	0.798476	0.7	0.191	0	1	AP1S2
CSF1R	0	0.796992	0.596	0.01	0	1	CSF1R	0	0.796992	0.596	0.01	0	1	CSF1R
NAMPT	0	0.773969	0.653	0.211	0	1	NAMPT	0	0.773969	0.653	0.211	0	1	NAMPT
EVI2B	0	0.768367	0.617	0.063	0	1	EVI2B	0	0.768367	0.617	0.063	0	1	EVI2B
TNFSF13B	0	0.756841	0.593	0.072	0	1	TNFSF13B	0	0.756841	0.593	0.072	0	1	TNFSF13B
CSTA	0	0.75679	0.54	0.059	0	1	CSTA	0	0.75679	0.54	0.059	0	1	CSTA
CYBB	0	0.755704	0.551	0.013	0	1	CYBB	0	0.755704	0.551	0.013	0	1	CYBB
GMFG	0	0.748822	0.753	0.15	0	1	GMFG	0	0.748822	0.753	0.15	0	1	GMFG
ARPC1B	0	0.74881	0.914	0.581	0	1	ARPC1B	0	0.74881	0.914	0.581	0	1	ARPC1B
FAM49B	0	0.743369	0.713	0.176	0	1	FAM49B	0	0.743369	0.713	0.176	0	1	FAM49B
ASAH1	0	0.738549	0.703	0.3	0	1	ASAH1	0	0.738549	0.703	0.3	0	1	ASAH1
CXCR4	0	0.737242	0.667	0.194	0	1	CXCR4	0	0.737242	0.667	0.194	0	1	CXCR4
CAPG	0	0.734942	0.574	0.243	0	1	CAPG	0	0.734942	0.574	0.243	0	1	CAPG
PLIN2	0	0.7319	0.553	0.21	0	1	PLIN2	0	0.7319	0.553	0.21	0	1	PLIN2
CD37	0	0.723686	0.682	0.11	0	1	CD37	0	0.723686	0.682	0.11	0	1	CD37
ARPC3	0	0.722271	0.949	0.687	0	1	ARPC3	0	0.722271	0.949	0.687	0	1	ARPC3
RNF130	0	0.72128	0.72	0.223	0	1	RNF130	0	0.72128	0.72	0.223	0	1	RNF130
ATP6V0B	0	0.720782	0.81	0.395	0	1	ATP6V0B	0	0.720782	0.81	0.395	0	1	ATP6V0B
RGS10	0	0.718039	0.708	0.288	0	1	RGS10	0	0.718039	0.708	0.288	0	1	RGS10
SOD2	0	0.71197	0.65	0.292	0	1	SOD2	0	0.71197	0.65	0.292	0	1	SOD2
CLEC7A	0	0.711616	0.569	0.01	0	1	CLEC7A	0	0.711616	0.569	0.01	0	1	CLEC7A
LY86	0	0.702571	0.566	0.011	0	1	LY86	0	0.702571	0.566	0.011	0	1	LY86
FGL2	0	0.69526	0.57	0.085	0	1	FGL2	0	0.69526	0.57	0.085	0	1	FGL2
LSP1	0	0.690565	0.598	0.169	0	1	LSP1	0	0.690565	0.598	0.169	0	1	LSP1
PYCARD	0	0.686717	0.706	0.244	0	1	PYCARD	0	0.686717	0.706	0.244	0	1	PYCARD
MCL1	0	0.676424	0.809	0.466	0	1	MCL1	0	0.676424	0.809	0.466	0	1	MCL1
CTSH	0	0.673838	0.673	0.228	0	1	CTSH	0	0.673838	0.673	0.228	0	1	CTSH
GPSM3	0	0.669957	0.675	0.13	0	1	GPSM3	0	0.669957	0.675	0.13	0	1	GPSM3
CD44	0	0.665115	0.669	0.205	0	1	CD44	0	0.665115	0.669	0.205	0	1	CD44
CD53	0	0.66299	0.636	0.088	0	1	CD53	0	0.66299	0.636	0.088	0	1	CD53
SDCBP	0	0.662974	0.816	0.46	0	1	SDCBP	0	0.662974	0.816	0.46	0	1	SDCBP
HCLS1	0	0.659442	0.615	0.071	0	1	HCLS1	0	0.659442	0.615	0.071	0	1	HCLS1
GLUL	0	0.655375	0.894	0.651	0	1	GLUL	0	0.655375	0.894	0.651	0	1	GLUL
CTSC	0	0.648597	0.645	0.207	0	1	CTSC	0	0.648597	0.645	0.207	0	1	CTSC
HCST	0	0.628034	0.661	0.137	0	1	HCST	0	0.628034	0.661	0.137	0	1	HCST
TMEM176B1	0	0.625419	0.634	0.294	0	1	TMEM176B	0	0.625419	0.634	0.294	0	1	TMEM176B
C10orf54	0	0.622078	0.6	0.202	0	1	C10orf54	0	0.622078	0.6	0.202	0	1	C10orf54
KCTD12	0	0.620356	0.657	0.198	0	1	KCTD12	0	0.620356	0.657	0.198	0	1	KCTD12
2020-03-01	0	0.619708	0.512	0.013	0	1	2020-03-01	0	0.619708	0.512	0.013	0	1	2020-03-01
PPT1	0	0.617595	0.653	0.242	0	1	PPT1	0	0.617595	0.653	0.242	0	1	PPT1
ARRB2	0	0.613823	0.592	0.086	0	1	ARRB2	0	0.613823	0.592	0.086	0	1	ARRB2
SLC16A3	0	0.597194	0.533	0.127	0	1	SLC16A3	0	0.597194	0.533	0.127	0	1	SLC16A3
NR4A2	0	0.59424	0.625	0.23	0	1	NR4A2	0	0.59424	0.625	0.23	0	1	NR4A2
MFSD1	0	0.592016	0.588	0.128	0	1	MFSD1	0	0.592016	0.588	0.128	0	1	MFSD1
LGALS9	0	0.58472	0.541	0.075	0	1	LGALS9	0	0.58472	0.541	0.075	0	1	LGALS9
LCP1	0	0.583722	0.563	0.084	0	1	LCP1	0	0.583722	0.563	0.084	0	1	LCP1
CD4	0	0.580959	0.51	0.03	0	1	CD4	0	0.580959	0.51	0.03	0	1	CD4
PTPRC	0	0.576703	0.684	0.138	0	1	PTPRC	0	0.576703	0.684	0.138	0	1	PTPRC
FXYD5	0	0.576042	0.767	0.373	0	1	FXYD5	0	0.576042	0.767	0.373	0	1	FXYD5
LITAF	0	0.571603	0.675	0.347	0	1	LITAF	0	0.571603	0.675	0.347	0	1	LITAF
IFNGR1	0	0.569416	0.623	0.218	0	1	IFNGR1	0	0.569416	0.623	0.218	0	1	IFNGR1
SMAP2	0	0.5624	0.512	0.073	0	1	SMAP2	0	0.5624	0.512	0.073	0	1	SMAP2
RHOG	0	0.560179	0.61	0.189	0	1	RHOG	0	0.560179	0.61	0.189	0	1	RHOG
GLIPR1	0	0.557109	0.599	0.169	0	1	GLIPR1	0	0.557109	0.599	0.169	0	1	GLIPR1
CKLF	0	0.556552	0.615	0.297	0	1	CKLF	0	0.556552	0.615	0.297	0	1	CKLF
REL	0	0.548689	0.569	0.188	0	1	REL	0	0.548689	0.569	0.188	0	1	REL
NFKBIA	0	0.546334	0.864	0.634	0	1	NFKBIA	0	0.546334	0.864	0.634	0	1	NFKBIA
CPVL	0	0.545607	0.553	0.155	0	1	CPVL	0	0.545607	0.553	0.155	0	1	CPVL
SLA	0	0.539238	0.546	0.072	0	1	SLA	0	0.539238	0.546	0.072	0	1	SLA
EMP3	0	0.527155	0.696	0.477	0	1	EMP3	9.1902e-269	0.527155	0.696	0.477	1.71553e-264	1	EMP3
TPP1	0	0.522614	0.585	0.173	0	1	TPP1	0	0.522614	0.585	0.173	0	1	TPP1
SAMHD1	0	0.521806	0.567	0.142	0	1	SAMHD1	0	0.521806	0.567	0.142	0	1	SAMHD1
ATP6V1F	0	0.516557	0.774	0.553	0	1	ATP6V1F	0	0.516557	0.774	0.553	0	1	ATP6V1F
ZEB2	0	0.514543	0.562	0.173	0	1	ZEB2	0	0.514543	0.562	0.173	0	1	ZEB2
ATP1B3	0	0.510702	0.635	0.32	0	1	ATP1B3	0	0.510702	0.635	0.32	0	1	ATP1B3
UCP2	0	0.508514	0.557	0.148	0	1	UCP2	0	0.508514	0.557	0.148	0	1	UCP2
TSPO	0	0.505959	0.847	0.625	0	1	TSPO	0	0.505959	0.847	0.625	0	1	TSPO
FOS	0	0.504111	0.973	0.754	0	1	FOS	0	0.504111	0.973	0.754	0	1	FOS
HLA-E	0	0.502628	0.905	0.602	0	1	HLA-E	0	0.502628	0.905	0.602	0	1	HLA-E
VAMP5	3.271e-320	0.547713	0.533	0.314	6.10636517e-316	1	VAMP5	1.03113e-239	0.547713	0.533	0.314	1.92482e-235	1	VAMP5
H3F3A	0	1.68849	0.998	0.633	0	2	H3F3A	0	1.68849	0.998	0.633	0	2	H3F3A	cancer cells
SOX4	0	1.66386	0.938	0.338	0	2	SOX4	0	1.66386	0.938	0.338	0	2	SOX4
HIST1H4C	0	1.52083	0.812	0.302	0	2	HIST1H4C	0	1.52083	0.812	0.302	0	2	HIST1H4C
NUCKS1	0	1.23546	0.984	0.683	0	2	NUCKS1	0	1.23546	0.984	0.683	0	2	NUCKS1
SNRPE	0	1.20628	0.991	0.56	0	2	SNRPE	0	1.20628	0.991	0.56	0	2	SNRPE
TUBB2B	0	1.16359	0.818	0.023	0	2	TUBB2B	0	1.16359	0.818	0.023	0	2	TUBB2B
BAMBI	0	1.14516	0.555	0.056	0	2	BAMBI	0	1.14516	0.555	0.056	0	2	BAMBI
HMGA2	0	1.10426	0.762	0.034	0	2	HMGA2	0	1.10426	0.762	0.034	0	2	HMGA2
TGFBI	0	1.07963	0.825	0.258	0	2	TGFBI	0	1.07963	0.825	0.258	0	2	TGFBI
IGF2	0	1.07708	0.679	0.183	0	2	IGF2	0	1.07708	0.679	0.183	0	2	IGF2
ITM2C	0	1.07361	0.906	0.282	0	2	ITM2C	0	1.07361	0.906	0.282	0	2	ITM2C
LAMC1	0	1.06791	0.751	0.18	0	2	LAMC1	0	1.06791	0.751	0.18	0	2	LAMC1
HOXA10	0	1.04124	0.782	0.026	0	2	HOXA10	0	1.04124	0.782	0.026	0	2	HOXA10
CRABP2	0	1.03224	0.816	0.183	0	2	CRABP2	0	1.03224	0.816	0.183	0	2	CRABP2
PCSK1N	0	1.02657	0.711	0.1	0	2	PCSK1N	0	1.02657	0.711	0.1	0	2	PCSK1N
TNNT1	0	0.984133	0.834	0.091	0	2	TNNT1	0	0.984133	0.834	0.091	0	2	TNNT1
CKS1B	0	0.982923	0.731	0.197	0	2	CKS1B	0	0.982923	0.731	0.197	0	2	CKS1B
NGFRAP1	0	0.980994	0.986	0.693	0	2	NGFRAP1	0	0.980994	0.986	0.693	0	2	NGFRAP1
CD24	0	0.962743	0.807	0.152	0	2	CD24	0	0.962743	0.807	0.152	0	2	CD24
PEG10	0	0.955809	0.708	0.087	0	2	PEG10	0	0.955809	0.708	0.087	0	2	PEG10
SNRPF	0	0.94282	0.935	0.413	0	2	SNRPF	0	0.94282	0.935	0.413	0	2	SNRPF
GNAS	0	0.912896	0.898	0.532	0	2	GNAS	0	0.912896	0.898	0.532	0	2	GNAS
S100A1	0	0.903958	0.802	0.132	0	2	S100A1	0	0.903958	0.802	0.132	0	2	S100A1
PTTG1	0	0.879148	0.523	0.072	0	2	PTTG1	0	0.879148	0.523	0.072	0	2	PTTG1
MLLT11	0	0.878002	0.658	0.093	0	2	MLLT11	0	0.878002	0.658	0.093	0	2	MLLT11
BEX1	0	0.867249	0.642	0.044	0	2	BEX1	0	0.867249	0.642	0.044	0	2	BEX1
NREP	0	0.850711	0.795	0.153	0	2	NREP	0	0.850711	0.795	0.153	0	2	NREP
CKB	0	0.840325	0.653	0.24	0	2	CKB	0	0.840325	0.653	0.24	0	2	CKB
AKAP12	0	0.838944	0.565	0.221	0	2	AKAP12	0	0.838944	0.565	0.221	0	2	AKAP12
PRAME	0	0.838566	0.731	0.019	0	2	PRAME	0	0.838566	0.731	0.019	0	2	PRAME
NME1	0	0.816999	0.839	0.272	0	2	NME1	0	0.816999	0.839	0.272	0	2	NME1
S100A13	0	0.794073	0.952	0.524	0	2	S100A13	0	0.794073	0.952	0.524	0	2	S100A13
KCNQ1OT1	0	0.790762	0.786	0.315	0	2	KCNQ1OT1	0	0.790762	0.786	0.315	0	2	KCNQ1OT1
SRP9	0	0.785812	0.943	0.558	0	2	SRP9	0	0.785812	0.943	0.558	0	2	SRP9
BMP7	0	0.778145	0.571	0.03	0	2	BMP7	0	0.778145	0.571	0.03	0	2	BMP7
TBCA	0	0.776821	0.976	0.669	0	2	TBCA	0	0.776821	0.976	0.669	0	2	TBCA
DBI	0	0.771405	0.944	0.564	0	2	DBI	0	0.771405	0.944	0.564	0	2	DBI
HMGN3	0	0.77083	0.921	0.593	0	2	HMGN3	0	0.77083	0.921	0.593	0	2	HMGN3
IGFBP2	0	0.760898	0.763	0.192	0	2	IGFBP2	0	0.760898	0.763	0.192	0	2	IGFBP2
PTMS	0	0.753915	0.873	0.385	0	2	PTMS	0	0.753915	0.873	0.385	0	2	PTMS
SEC61G	0	0.748283	0.959	0.61	0	2	SEC61G	0	0.748283	0.959	0.61	0	2	SEC61G
TOMM20	0	0.744106	0.879	0.444	0	2	TOMM20	0	0.744106	0.879	0.444	0	2	TOMM20
PAX2	0	0.744025	0.545	0.03	0	2	PAX2	0	0.744025	0.545	0.03	0	2	PAX2
MIF	0	0.73826	0.965	0.621	0	2	MIF	0	0.73826	0.965	0.621	0	2	MIF
MEX3A	0	0.73617	0.64	0.052	0	2	MEX3A	0	0.73617	0.64	0.052	0	2	MEX3A
CBX5	0	0.735233	0.755	0.195	0	2	CBX5	0	0.735233	0.755	0.195	0	2	CBX5
ATOX1	0	0.732778	0.892	0.44	0	2	ATOX1	0	0.732778	0.892	0.44	0	2	ATOX1
TTC3	0	0.729412	0.908	0.466	0	2	TTC3	0	0.729412	0.908	0.466	0	2	TTC3
HSPE1	0	0.719895	0.936	0.588	0	2	HSPE1	0	0.719895	0.936	0.588	0	2	HSPE1
LDHB	0	0.719739	0.956	0.68	0	2	LDHB	0	0.719739	0.956	0.68	0	2	LDHB
MZT2A	0	0.718251	0.891	0.429	0	2	MZT2A	0	0.718251	0.891	0.429	0	2	MZT2A
GCSH	0	0.715993	0.75	0.131	0	2	GCSH	0	0.715993	0.75	0.131	0	2	GCSH
HMGN1	0	0.711429	0.973	0.73	0	2	HMGN1	0	0.711429	0.973	0.73	0	2	HMGN1
PCBP2	0	0.708557	0.967	0.695	0	2	PCBP2	0	0.708557	0.967	0.695	0	2	PCBP2
MPC2	0	0.707457	0.76	0.331	0	2	MPC2	0	0.707457	0.76	0.331	0	2	MPC2
RPL22L1	0	0.70223	0.827	0.376	0	2	RPL22L1	0	0.70223	0.827	0.376	0	2	RPL22L1
CXXC5	0	0.700806	0.701	0.16	0	2	CXXC5	0	0.700806	0.701	0.16	0	2	CXXC5
BNIP3	0	0.699379	0.587	0.227	0	2	BNIP3	0	0.699379	0.587	0.227	0	2	BNIP3
GPC3	0	0.698934	0.616	0.095	0	2	GPC3	0	0.698934	0.616	0.095	0	2	GPC3
NME4	0	0.696596	0.819	0.282	0	2	NME4	0	0.696596	0.819	0.282	0	2	NME4
FAM213A	0	0.694	0.77	0.202	0	2	FAM213A	0	0.694	0.77	0.202	0	2	FAM213A
PRRC2C	0	0.693435	0.877	0.425	0	2	PRRC2C	0	0.693435	0.877	0.425	0	2	PRRC2C
ENC1	0	0.68515	0.598	0.058	0	2	ENC1	0	0.68515	0.598	0.058	0	2	ENC1
SNRPG	0	0.685071	0.907	0.506	0	2	SNRPG	0	0.685071	0.907	0.506	0	2	SNRPG
RANBP1	0	0.681905	0.83	0.424	0	2	RANBP1	0	0.681905	0.83	0.424	0	2	RANBP1
DUSP6	0	0.676261	0.679	0.162	0	2	DUSP6	0	0.676261	0.679	0.162	0	2	DUSP6
CFDP1	0	0.673677	0.821	0.276	0	2	CFDP1	0	0.673677	0.821	0.276	0	2	CFDP1
MDK1	0	0.669861	0.923	0.606	0	2	MDK	0	0.669861	0.923	0.606	0	2	MDK
HIPK2	0	0.667658	0.55	0.132	0	2	HIPK2	0	0.667658	0.55	0.132	0	2	HIPK2
MZT2B	0	0.667458	0.952	0.619	0	2	MZT2B	0	0.667458	0.952	0.619	0	2	MZT2B
ODC1	0	0.661865	0.62	0.163	0	2	ODC1	0	0.661865	0.62	0.163	0	2	ODC1
MYL6B	0	0.65237	0.795	0.265	0	2	MYL6B	0	0.65237	0.795	0.265	0	2	MYL6B
LAGE3	0	0.651356	0.751	0.208	0	2	LAGE3	0	0.651356	0.751	0.208	0	2	LAGE3
FBL	0	0.651004	0.88	0.412	0	2	FBL	0	0.651004	0.88	0.412	0	2	FBL
HN1	0	0.648047	0.751	0.292	0	2	HN1	0	0.648047	0.751	0.292	0	2	HN1
HSPD1	0	0.647123	0.855	0.429	0	2	HSPD1	0	0.647123	0.855	0.429	0	2	HSPD1
ATP5G3	0	0.64698	0.952	0.664	0	2	ATP5G3	0	0.64698	0.952	0.664	0	2	ATP5G3
MARCKS	0	0.639094	0.814	0.354	0	2	MARCKS	0	0.639094	0.814	0.354	0	2	MARCKS
IGF2BP2	0	0.638714	0.696	0.106	0	2	IGF2BP2	0	0.638714	0.696	0.106	0	2	IGF2BP2
NENF	0	0.632258	0.859	0.393	0	2	NENF	0	0.632258	0.859	0.393	0	2	NENF
PARP1	0	0.623625	0.703	0.239	0	2	PARP1	0	0.623625	0.703	0.239	0	2	PARP1
HMGN2	0	0.623147	0.859	0.436	0	2	HMGN2	0	0.623147	0.859	0.436	0	2	HMGN2
PSMB5	0	0.620323	0.877	0.425	0	2	PSMB5	0	0.620323	0.877	0.425	0	2	PSMB5
LSM7	0	0.615979	0.886	0.467	0	2	LSM7	0	0.615979	0.886	0.467	0	2	LSM7
YWHAE	0	0.611907	0.947	0.679	0	2	YWHAE	0	0.611907	0.947	0.679	0	2	YWHAE
PAFAH1B3	0	0.61129	0.683	0.153	0	2	PAFAH1B3	0	0.61129	0.683	0.153	0	2	PAFAH1B3
EIF5A	0	0.610892	0.853	0.427	0	2	EIF5A	0	0.610892	0.853	0.427	0	2	EIF5A
GTF2I	0	0.608825	0.752	0.216	0	2	GTF2I	0	0.608825	0.752	0.216	0	2	GTF2I
RPL39L	0	0.607043	0.634	0.121	0	2	RPL39L	0	0.607043	0.634	0.121	0	2	RPL39L
GOLIM4	0	0.607007	0.607	0.202	0	2	GOLIM4	0	0.607007	0.607	0.202	0	2	GOLIM4
UCHL1	0	0.603446	0.618	0.111	0	2	UCHL1	0	0.603446	0.618	0.111	0	2	UCHL1
USMG5	0	0.603029	0.958	0.66	0	2	USMG5	0	0.603029	0.958	0.66	0	2	USMG5
H2AFZ	0	0.599864	0.854	0.642	0	2	H2AFZ	0	0.599864	0.854	0.642	0	2	H2AFZ
HDAC2	0	0.592696	0.74	0.264	0	2	HDAC2	0	0.592696	0.74	0.264	0	2	HDAC2
MT-ND6	0	0.590795	0.632	0.19	0	2	MT-ND6	0	0.590795	0.632	0.19	0	2	MT-ND6
HES1	0	0.581367	0.506	0.11	0	2	HES1	0	0.581367	0.506	0.11	0	2	HES1
HMGA1	0	0.580925	0.576	0.21	0	2	HMGA1	0	0.580925	0.576	0.21	0	2	HMGA1
NHP2	0	0.580412	0.838	0.412	0	2	NHP2	0	0.580412	0.838	0.412	0	2	NHP2
TXNDC17	0	0.574305	0.782	0.312	0	2	TXNDC17	0	0.574305	0.782	0.312	0	2	TXNDC17
DYNLT1	0	0.574039	0.877	0.504	0	2	DYNLT1	0	0.574039	0.877	0.504	0	2	DYNLT1
SEMA6A	0	0.572519	0.542	0.048	0	2	SEMA6A	0	0.572519	0.542	0.048	0	2	SEMA6A
COL9A3	0	0.569799	0.571	0.056	0	2	COL9A3	0	0.569799	0.571	0.056	0	2	COL9A3
HSBP1	0	0.566484	0.918	0.56	0	2	HSBP1	0	0.566484	0.918	0.56	0	2	HSBP1
SHFM1	0	0.559904	0.965	0.724	0	2	SHFM1	0	0.559904	0.965	0.724	0	2	SHFM1
ATP5J	0	0.554333	0.961	0.73	0	2	ATP5J	0	0.554333	0.961	0.73	0	2	ATP5J
CSRP2	0	0.553404	0.625	0.141	0	2	CSRP2	0	0.553404	0.625	0.141	0	2	CSRP2
SF3B5	0	0.552438	0.885	0.505	0	2	SF3B5	0	0.552438	0.885	0.505	0	2	SF3B5
ZNF428	0	0.551822	0.797	0.367	0	2	ZNF428	0	0.551822	0.797	0.367	0	2	ZNF428
ENAH	0	0.551241	0.664	0.165	0	2	ENAH	0	0.551241	0.664	0.165	0	2	ENAH
MSI2	0	0.550588	0.609	0.152	0	2	MSI2	0	0.550588	0.609	0.152	0	2	MSI2
RAN	0	0.550264	0.906	0.628	0	2	RAN	0	0.550264	0.906	0.628	0	2	RAN
ILF2	0	0.549721	0.78	0.332	0	2	ILF2	0	0.549721	0.78	0.332	0	2	ILF2
NUDT4	0	0.548663	0.642	0.175	0	2	NUDT4	0	0.548663	0.642	0.175	0	2	NUDT4
MRPL52	0	0.547613	0.783	0.34	0	2	MRPL52	0	0.547613	0.783	0.34	0	2	MRPL52
COX20	0	0.547036	0.722	0.248	0	2	COX20	0	0.547036	0.722	0.248	0	2	COX20
KDM5B	0	0.546656	0.613	0.129	0	2	KDM5B	0	0.546656	0.613	0.129	0	2	KDM5B
LSM2	0	0.54193	0.791	0.335	0	2	LSM2	0	0.54193	0.791	0.335	0	2	LSM2
ITGB1	0	0.535652	0.807	0.359	0	2	ITGB1	0	0.535652	0.807	0.359	0	2	ITGB1
DNAJC19	0	0.530868	0.751	0.296	0	2	DNAJC19	0	0.530868	0.751	0.296	0	2	DNAJC19
NDUFB11	0	0.528691	0.9	0.569	0	2	NDUFB11	0	0.528691	0.9	0.569	0	2	NDUFB11
ACBD6	0	0.528146	0.642	0.153	0	2	ACBD6	0	0.528146	0.642	0.153	0	2	ACBD6
NDUFS6	0	0.527017	0.838	0.453	0	2	NDUFS6	0	0.527017	0.838	0.453	0	2	NDUFS6
TCP1	0	0.524084	0.76	0.311	0	2	TCP1	0	0.524084	0.76	0.311	0	2	TCP1
UFC1	0	0.522801	0.872	0.493	0	2	UFC1	0	0.522801	0.872	0.493	0	2	UFC1
LSM5	0	0.522765	0.819	0.416	0	2	LSM5	0	0.522765	0.819	0.416	0	2	LSM5
NDUFB4	0	0.520846	0.922	0.627	0	2	NDUFB4	0	0.520846	0.922	0.627	0	2	NDUFB4
CDK4	0	0.518963	0.733	0.292	0	2	CDK4	0	0.518963	0.733	0.292	0	2	CDK4
H2AFY2	0	0.517968	0.531	0.077	0	2	H2AFY2	0	0.517968	0.531	0.077	0	2	H2AFY2
ABRACL	0	0.516609	0.743	0.279	0	2	ABRACL	0	0.516609	0.743	0.279	0	2	ABRACL
SPATS2	0	0.515729	0.588	0.129	0	2	SPATS2	0	0.515729	0.588	0.129	0	2	SPATS2
SUMO1	0	0.515691	0.875	0.525	0	2	SUMO1	0	0.515691	0.875	0.525	0	2	SUMO1
POLR2H	0	0.515535	0.687	0.208	0	2	POLR2H	0	0.515535	0.687	0.208	0	2	POLR2H
NUTF2	0	0.513925	0.701	0.224	0	2	NUTF2	0	0.513925	0.701	0.224	0	2	NUTF2
PCBD1	0	0.512702	0.704	0.323	0	2	PCBD1	0	0.512702	0.704	0.323	0	2	PCBD1
POLR2J3	0	0.512459	0.723	0.295	0	2	POLR2J3	0	0.512459	0.723	0.295	0	2	POLR2J3
H2AFV	0	0.511225	0.758	0.383	0	2	H2AFV	0	0.511225	0.758	0.383	0	2	H2AFV
STMN1	0	0.510713	0.799	0.375	0	2	STMN1	0	0.510713	0.799	0.375	0	2	STMN1
DEK	0	0.507999	0.717	0.455	0	2	DEK	2.07203e-269	0.507999	0.717	0.455	3.86785e-265	2	DEK
ZCRB1	0	0.50731	0.761	0.33	0	2	ZCRB1	0	0.50731	0.761	0.33	0	2	ZCRB1
EIF2S2	0	0.507222	0.803	0.401	0	2	EIF2S2	0	0.507222	0.803	0.401	0	2	EIF2S2
FUS	0	0.505723	0.895	0.638	0	2	FUS	0	0.505723	0.895	0.638	0	2	FUS
LAPTM4B	0	0.504714	0.564	0.177	0	2	LAPTM4B	0	0.504714	0.564	0.177	0	2	LAPTM4B
TPR	0	0.504178	0.735	0.328	0	2	TPR	0	0.504178	0.735	0.328	0	2	TPR
CBX1	0	0.504094	0.634	0.199	0	2	CBX1	0	0.504094	0.634	0.199	0	2	CBX1
GTF2H5	0	0.503006	0.752	0.349	0	2	GTF2H5	0	0.503006	0.752	0.349	0	2	GTF2H5
WFDC2	0	2.36156	0.926	0.271	0	3	WFDC2	0	2.36156	0.926	0.271	0	3	WFDC2	cancer cells
CLU	0	2.09436	0.919	0.616	0	3	CLU	0	2.09436	0.919	0.616	0	3	CLU
SLPI	0	1.86458	0.785	0.197	0	3	SLPI	0	1.86458	0.785	0.197	0	3	SLPI
KRT7	0	1.7349	0.838	0.079	0	3	KRT7	0	1.7349	0.838	0.079	0	3	KRT7
CAPS	0	1.6005	0.7	0.059	0	3	CAPS	0	1.6005	0.7	0.059	0	3	CAPS
BCAM	0	1.42197	0.9	0.206	0	3	BCAM	0	1.42197	0.9	0.206	0	3	BCAM
CLDN3	0	1.30901	0.76	0.05	0	3	CLDN3	0	1.30901	0.76	0.05	0	3	CLDN3
S100A11	0	1.24903	0.687	0.159	0	3	S100A1	0	1.24903	0.687	0.159	0	3	S100A1
CD241	0	1.24325	0.721	0.176	0	3	CD24	0	1.24325	0.721	0.176	0	3	CD24
KRT19	0	1.21551	0.845	0.231	0	3	KRT19	0	1.21551	0.845	0.231	0	3	KRT19
MSLN	0	1.18589	0.723	0.106	0	3	MSLN	0	1.18589	0.723	0.106	0	3	MSLN
KRT181	0	1.1564	0.919	0.298	0	3	KRT18	0	1.1564	0.919	0.298	0	3	KRT18
CLDN4	0	1.1429	0.636	0.073	0	3	CLDN4	0	1.1429	0.636	0.073	0	3	CLDN4
FXYD3	0	1.04795	0.543	0.027	0	3	FXYD3	0	1.04795	0.543	0.027	0	3	FXYD3
EPCAM	0	1.03329	0.689	0.076	0	3	EPCAM	0	1.03329	0.689	0.076	0	3	EPCAM
C1orf186	0	1.01399	0.661	0.024	0	3	C1orf186	0	1.01399	0.661	0.024	0	3	C1orf186
SPINT2	0	1.00898	0.867	0.272	0	3	SPINT2	0	1.00898	0.867	0.272	0	3	SPINT2
KRT81	0	1.00509	0.884	0.273	0	3	KRT8	0	1.00509	0.884	0.273	0	3	KRT8
C19orf33	0	0.970153	0.728	0.077	0	3	C19orf33	0	0.970153	0.728	0.077	0	3	C19orf33
CRIP2	0	0.968573	0.841	0.248	0	3	CRIP2	0	0.968573	0.841	0.248	0	3	CRIP2
CP	0	0.925384	0.604	0.047	0	3	CP	0	0.925384	0.604	0.047	0	3	CP
ELF3	0	0.9046	0.55	0.051	0	3	ELF3	0	0.9046	0.55	0.051	0	3	ELF3
FOLR1	0	0.832599	0.538	0.05	0	3	FOLR1	0	0.832599	0.538	0.05	0	3	FOLR1
PAX8	0	0.825231	0.627	0.08	0	3	PAX8	0	0.825231	0.627	0.08	0	3	PAX8
MUC1	0	0.817181	0.546	0.056	0	3	MUC1	0	0.817181	0.546	0.056	0	3	MUC1
CCND1	0	0.805412	0.567	0.125	0	3	CCND1	0	0.805412	0.567	0.125	0	3	CCND1
SOX17	0	0.781726	0.532	0.037	0	3	SOX17	0	0.781726	0.532	0.037	0	3	SOX17
SMIM22	0	0.779071	0.502	0.039	0	3	SMIM22	0	0.779071	0.502	0.039	0	3	SMIM22
IFI27	0	0.773258	0.774	0.416	0	3	IFI27	0	0.773258	0.774	0.416	0	3	IFI27
CD9	0	0.757456	0.804	0.374	0	3	CD9	0	0.757456	0.804	0.374	0	3	CD9
CCDC146	0	0.747058	0.517	0.055	0	3	CCDC146	0	0.747058	0.517	0.055	0	3	CCDC146
TSTD1	0	0.745938	0.816	0.285	0	3	TSTD1	0	0.745938	0.816	0.285	0	3	TSTD1
PKM	0	0.731605	0.901	0.679	0	3	PKM	0	0.731605	0.901	0.679	0	3	PKM
PERP1	0	0.727359	0.701	0.229	0	3	PERP	0	0.727359	0.701	0.229	0	3	PERP
TM4SF1	0	0.713782	0.749	0.311	0	3	TM4SF1	0	0.713782	0.749	0.311	0	3	TM4SF1
RBP11	0	0.704537	0.875	0.43	0	3	RBP1	0	0.704537	0.875	0.43	0	3	RBP1
MAL2	0	0.695511	0.543	0.04	0	3	MAL2	0	0.695511	0.543	0.04	0	3	MAL2
LYPD1	0	0.684077	0.507	0.081	0	3	LYPD1	0	0.684077	0.507	0.081	0	3	LYPD1
NDUFB9	0	0.679141	0.883	0.536	0	3	NDUFB9	0	0.679141	0.883	0.536	0	3	NDUFB9
MTCH1	0	0.659422	0.627	0.417	0	3	MTCH1	1.07944e-202	0.659422	0.627	0.417	2.015e-198	3	MTCH1
CLDN7	0	0.642623	0.502	0.037	0	3	CLDN7	0	0.642623	0.502	0.037	0	3	CLDN7
LEMD1	0	0.633066	0.501	0.058	0	3	LEMD1	0	0.633066	0.501	0.058	0	3	LEMD1
TUBB4B	0	0.628385	0.597	0.314	0	3	TUBB4B	5.85129e-247	0.628385	0.597	0.314	1.09226e-242	3	TUBB4B
LYPD6B	0	0.614965	0.515	0.037	0	3	LYPD6B	0	0.614965	0.515	0.037	0	3	LYPD6B
ASS1	0	0.607408	0.536	0.093	0	3	ASS1	0	0.607408	0.536	0.093	0	3	ASS1
DMKN	0	0.603352	0.691	0.207	0	3	DMKN	0	0.603352	0.691	0.207	0	3	DMKN
CETN21	0	0.596821	0.516	0.276	0	3	CETN2	7.65539e-188	0.596821	0.516	0.276	1.42903e-183	3	CETN2
EFHC1	0	0.591032	0.513	0.15	0	3	EFHC1	0	0.591032	0.513	0.15	0	3	EFHC1
EMX2	0	0.578021	0.586	0.101	0	3	EMX2	0	0.578021	0.586	0.101	0	3	EMX2
OCIAD21	0	0.513622	0.65	0.274	0	3	OCIAD2	0	0.513622	0.65	0.274	0	3	OCIAD2
TNFRSF12A	2.584e-321	0.585182	0.502	0.172	4.8234843e-317	3	TNFRSF12A	0	0.585182	0.502	0.172	0	3	TNFRSF12A
TSC22D1	2.03819e-303	0.718332	0.771	0.546	3.80469e-299	3	TSC22D1	1.14126e-259	0.718332	0.771	0.546	2.13039e-255	3	TSC22D1
DUSP231	1.32853e-282	0.512224	0.63	0.365	2.47997e-278	3	DUSP23	7.97988e-218	0.512224	0.63	0.365	1.4896e-213	3	DUSP23
CKB1	2.94071e-271	0.554338	0.587	0.256	5.48943e-267	3	CKB	0	0.554338	0.587	0.256	0	3	CKB
CCL5	0	2.30228	0.737	0.066	0	4	CCL5	0	2.30228	0.737	0.066	0	4	CCL5	T & NK cells
IL32	0	2.07825	0.865	0.19	0	4	IL32	0	2.07825	0.865	0.19	0	4	IL32
CD52	0	1.92912	0.912	0.127	0	4	CD52	0	1.92912	0.912	0.127	0	4	CD52
NKG7	0	1.85219	0.586	0.048	0	4	NKG7	0	1.85219	0.586	0.048	0	4	NKG7
CCL4	0	1.71245	0.563	0.156	0	4	CCL4	0	1.71245	0.563	0.156	0	4	CCL4
GZMA	0	1.62821	0.628	0.033	0	4	GZMA	0	1.62821	0.628	0.033	0	4	GZMA
LTB	0	1.5124	0.599	0.036	0	4	LTB	0	1.5124	0.599	0.036	0	4	LTB
TRAC	0	1.44727	0.74	0.05	0	4	TRAC	0	1.44727	0.74	0.05	0	4	TRAC
CD3D	0	1.41899	0.718	0.034	0	4	CD3D	0	1.41899	0.718	0.034	0	4	CD3D
CD7	0	1.40569	0.663	0.047	0	4	CD7	0	1.40569	0.663	0.047	0	4	CD7
CXCR41	0	1.35844	0.855	0.22	0	4	CXCR4	0	1.35844	0.855	0.22	0	4	CXCR4
CD2	0	1.3377	0.729	0.028	0	4	CD2	0	1.3377	0.729	0.028	0	4	CD2
CORO1A1	0	1.24182	0.82	0.151	0	4	CORO1A	0	1.24182	0.82	0.151	0	4	CORO1A
TRBC1	0	1.23956	0.501	0.02	0	4	TRBC1	0	1.23956	0.501	0.02	0	4	TRBC1
TRBC2	0	1.2343	0.633	0.029	0	4	TRBC2	0	1.2343	0.633	0.029	0	4	TRBC2
CD69	0	1.20467	0.652	0.047	0	4	CD69	0	1.20467	0.652	0.047	0	4	CD69
HCST1	0	1.18665	0.809	0.172	0	4	HCST	0	1.18665	0.809	0.172	0	4	HCST
CD3E	0	1.11259	0.686	0.02	0	4	CD3E	0	1.11259	0.686	0.02	0	4	CD3E
BTG1	0	1.11019	0.985	0.743	0	4	BTG1	0	1.11019	0.985	0.743	0	4	BTG1
CTSW	0	1.10565	0.551	0.022	0	4	CTSW	0	1.10565	0.551	0.022	0	4	CTSW
ARHGDIB1	0	1.0832	0.905	0.311	0	4	ARHGDIB	0	1.0832	0.905	0.311	0	4	ARHGDIB
RAC2	0	1.06567	0.72	0.1	0	4	RAC2	0	1.06567	0.72	0.1	0	4	RAC2
CST7	0	1.03215	0.548	0.049	0	4	CST7	0	1.03215	0.548	0.049	0	4	CST7
PTPRC1	0	0.987277	0.778	0.181	0	4	PTPRC	0	0.987277	0.778	0.181	0	4	PTPRC
S100A41	0	0.928984	0.917	0.465	0	4	S100A4	0	0.928984	0.917	0.465	0	4	S100A4
EVL	0	0.901669	0.677	0.176	0	4	EVL	0	0.901669	0.677	0.176	0	4	EVL
ZFP36L2	0	0.891255	0.844	0.546	0	4	ZFP36L2	0	0.891255	0.844	0.546	0	4	ZFP36L2
IL2RG	0	0.886978	0.618	0.054	0	4	IL2RG	0	0.886978	0.618	0.054	0	4	IL2RG
SH3BGRL31	0	0.869361	0.983	0.718	0	4	SH3BGRL3	0	0.869361	0.983	0.718	0	4	SH3BGRL3
ACAP1	0	0.858848	0.623	0.064	0	4	ACAP1	0	0.858848	0.623	0.064	0	4	ACAP1
LCK	0	0.817689	0.54	0.015	0	4	LCK	0	0.817689	0.54	0.015	0	4	LCK
ISG20	0	0.77185	0.556	0.113	0	4	ISG20	0	0.77185	0.556	0.113	0	4	ISG20
CD48	0	0.714465	0.551	0.108	0	4	CD48	0	0.714465	0.551	0.108	0	4	CD48
CD371	0	0.71081	0.667	0.169	0	4	CD37	0	0.71081	0.667	0.169	0	4	CD37
CYTIP	0	0.708118	0.562	0.096	0	4	CYTIP	0	0.708118	0.562	0.096	0	4	CYTIP
RARRES3	0	0.673631	0.636	0.295	0	4	RARRES3	0	0.673631	0.636	0.295	0	4	RARRES3
HLA-E1	0	0.673003	0.944	0.628	0	4	HLA-E	0	0.673003	0.944	0.628	0	4	HLA-E
ALOX5AP1	0	0.651445	0.575	0.151	0	4	ALOX5AP	0	0.651445	0.575	0.151	0	4	ALOX5AP
GMFG1	0	0.648871	0.659	0.222	0	4	GMFG	0	0.648871	0.659	0.222	0	4	GMFG
LSP11	0	0.638688	0.65	0.206	0	4	LSP1	0	0.638688	0.65	0.206	0	4	LSP1
PSMB91	0	0.628039	0.629	0.302	0	4	PSMB9	0	0.628039	0.629	0.302	0	4	PSMB9
STK17A	0	0.627365	0.506	0.136	0	4	STK17A	0	0.627365	0.506	0.136	0	4	STK17A
PPP2R5C	0	0.617634	0.507	0.183	0	4	PPP2R5C	0	0.617634	0.507	0.183	0	4	PPP2R5C
TXNIP	0	0.614978	0.914	0.695	0	4	TXNIP	1.03147e-304	0.614978	0.914	0.695	1.92544e-300	4	TXNIP
LCP11	0	0.568075	0.519	0.137	0	4	LCP1	0	0.568075	0.519	0.137	0	4	LCP1
FXYD51	0	0.553851	0.707	0.42	0	4	FXYD5	1.21145e-299	0.553851	0.707	0.42	2.26141e-295	4	FXYD5
CD531	0	0.536387	0.54	0.154	0	4	CD53	0	0.536387	0.54	0.154	0	4	CD53
GPSM31	0	0.510014	0.542	0.201	0	4	GPSM3	0	0.510014	0.542	0.201	0	4	GPSM3
TSC22D3	0	0.577849	0.859	0.601	3.27636e-304	4	TSC22D3	2.73846e-295	0.577849	0.859	0.601	5.11189e-291	4	TSC22D3
TAGLN	0	2.67745	0.973	0.427	0	5	TAGLN	0	2.67745	0.973	0.427	0	5	TAGLN	Fibroblast cells
ADIRF	0	2.49275	0.973	0.423	0	5	ADIRF	0	2.49275	0.973	0.423	0	5	ADIRF
MYL9	0	2.40984	0.99	0.484	0	5	MYL9	0	2.40984	0.99	0.484	0	5	MYL9
ACTA2	0	2.19903	0.935	0.26	0	5	ACTA2	0	2.19903	0.935	0.26	0	5	ACTA2
MYH11	0	1.98384	0.81	0.022	0	5	MYH11	0	1.98384	0.81	0.022	0	5	MYH11
DSTN	0	1.88135	0.988	0.758	0	5	DSTN	0	1.88135	0.988	0.758	0	5	DSTN
TPM21	0	1.83572	0.974	0.433	0	5	TPM2	0	1.83572	0.974	0.433	0	5	TPM2
PLN	0	1.75525	0.781	0.008	0	5	PLN	0	1.75525	0.781	0.008	0	5	PLN
PPP1R14A	0	1.64415	0.891	0.117	0	5	PPP1R14A	0	1.64415	0.891	0.117	0	5	PPP1R14A
IGFBP71	0	1.60731	0.999	0.715	0	5	IGFBP7	0	1.60731	0.999	0.715	0	5	IGFBP7
RERGL	0	1.46352	0.63	0.004	0	5	RERGL	0	1.46352	0.63	0.004	0	5	RERGL
TSC22D11	0	1.39856	0.911	0.553	0	5	TSC22D1	0	1.39856	0.911	0.553	0	5	TSC22D1
SOD3	0	1.39044	0.889	0.169	0	5	SOD3	0	1.39044	0.889	0.169	0	5	SOD3
TPM11	0	1.23786	0.931	0.415	0	5	TPM1	0	1.23786	0.931	0.415	0	5	TPM1
SNCG	0	1.22394	0.693	0.152	0	5	SNCG	0	1.22394	0.693	0.152	0	5	SNCG
CALD11	0	1.1781	0.998	0.667	0	5	CALD1	0	1.1781	0.998	0.667	0	5	CALD1
CSRP1	0	1.17286	0.813	0.278	0	5	CSRP1	0	1.17286	0.813	0.278	0	5	CSRP1
CAV11	0	1.1659	0.945	0.291	0	5	CAV1	0	1.1659	0.945	0.291	0	5	CAV1
SPARCL11	0	1.15428	0.958	0.32	0	5	SPARCL1	0	1.15428	0.958	0.32	0	5	SPARCL1
TINAGL1	0	1.11452	0.811	0.073	0	5	TINAGL1	0	1.11452	0.811	0.073	0	5	TINAGL1
SELM1	0	1.08791	0.923	0.434	0	5	SELM	0	1.08791	0.923	0.434	0	5	SELM
MFGE81	0	1.04061	0.887	0.337	0	5	MFGE8	0	1.04061	0.887	0.337	0	5	MFGE8
CSRP21	0	1.03609	0.761	0.172	0	5	CSRP2	0	1.03609	0.761	0.172	0	5	CSRP2
C2orf40	0	1.03218	0.6	0.058	0	5	C2orf40	0	1.03218	0.6	0.058	0	5	C2orf40
CRYAB	0	1.01897	0.79	0.217	0	5	CRYAB	0	1.01897	0.79	0.217	0	5	CRYAB
LMOD1	0	0.976944	0.655	0.055	0	5	LMOD1	0	0.976944	0.655	0.055	0	5	LMOD1
C12orf751	0	0.971847	0.698	0.232	0	5	C12orf75	0	0.971847	0.698	0.232	0	5	C12orf75
TIMP3	0	0.954673	0.882	0.273	0	5	TIMP3	0	0.954673	0.882	0.273	0	5	TIMP3
MCAM	0	0.94239	0.683	0.034	0	5	MCAM	0	0.94239	0.683	0.034	0	5	MCAM
SORBS2	0	0.938433	0.56	0.143	0	5	SORBS2	0	0.938433	0.56	0.143	0	5	SORBS2
NOTCH3	0	0.917846	0.651	0.075	0	5	NOTCH3	0	0.917846	0.651	0.075	0	5	NOTCH3
BCAM1	0	0.913798	0.806	0.255	0	5	BCAM	0	0.913798	0.806	0.255	0	5	BCAM
MYLK	0	0.880817	0.709	0.139	0	5	MYLK	0	0.880817	0.709	0.139	0	5	MYLK
FLNA	0	0.873645	0.818	0.374	0	5	FLNA	0	0.873645	0.818	0.374	0	5	FLNA
PRKCDBP1	0	0.847864	0.787	0.267	0	5	PRKCDBP	0	0.847864	0.787	0.267	0	5	PRKCDBP
PLAC9	0	0.825669	0.686	0.099	0	5	PLAC9	0	0.825669	0.686	0.099	0	5	PLAC9
PTP4A3	0	0.824324	0.608	0.065	0	5	PTP4A3	0	0.824324	0.608	0.065	0	5	PTP4A3
MT1M	0	0.817618	0.669	0.159	0	5	MT1M	0	0.817618	0.669	0.159	0	5	MT1M
PTRF1	0	0.810977	0.823	0.351	0	5	PTRF	0	0.810977	0.823	0.351	0	5	PTRF
CNN1	0	0.80643	0.562	0.04	0	5	CNN1	0	0.80643	0.562	0.04	0	5	CNN1
CAV2	0	0.78488	0.718	0.168	0	5	CAV2	0	0.78488	0.718	0.168	0	5	CAV2
FRZB	0	0.77396	0.62	0.058	0	5	FRZB	0	0.77396	0.62	0.058	0	5	FRZB
FXYD1	0	0.770109	0.714	0.241	0	5	FXYD1	0	0.770109	0.714	0.241	0	5	FXYD1
COX7A1	0	0.758398	0.662	0.128	0	5	COX7A1	0	0.758398	0.662	0.128	0	5	COX7A1
PDGFRB	0	0.75211	0.584	0.13	0	5	PDGFRB	0	0.75211	0.584	0.13	0	5	PDGFRB
PALLD	0	0.716368	0.669	0.199	0	5	PALLD	0	0.716368	0.669	0.199	0	5	PALLD
GUCY1A3	0	0.639758	0.555	0.038	0	5	GUCY1A3	0	0.639758	0.555	0.038	0	5	GUCY1A3
TGFB1I1	0	0.63818	0.643	0.195	0	5	TGFB1I1	0	0.63818	0.643	0.195	0	5	TGFB1I1
SYNPO2	0	0.635623	0.512	0.086	0	5	SYNPO2	0	0.635623	0.512	0.086	0	5	SYNPO2
TNS1	0	0.633444	0.592	0.11	0	5	TNS1	0	0.633444	0.592	0.11	0	5	TNS1
AC013461.1	0	0.612426	0.633	0.189	0	5	AC013461.1	0	0.612426	0.633	0.189	0	5	AC013461.1
ARPC1A1	0	0.593821	0.721	0.406	0	5	ARPC1A	3.98937e-207	0.593821	0.721	0.406	7.44695e-203	5	ARPC1A
EFHD1	0	0.591169	0.524	0.055	0	5	EFHD1	0	0.591169	0.524	0.055	0	5	EFHD1
RBPMS	0	0.578876	0.606	0.165	0	5	RBPMS	0	0.578876	0.606	0.165	0	5	RBPMS
C1QTNF1	0	0.559729	0.52	0.077	0	5	C1QTNF1	0	0.559729	0.52	0.077	0	5	C1QTNF1
SBDS	5.888602685698e-310	0.556265	0.699	0.362	1.09923e-305	5	SBDS	8.91585e-211	0.556265	0.699	0.362	1.66432e-206	5	SBDS
PPP1R12A	7.50564425340945e-310	0.541062	0.659	0.273	1.40108e-305	5	PPP1R12A	2.17191e-250	0.541062	0.659	0.273	4.0543e-246	5	PPP1R12A
NEXN	1.45593e-299	0.580311	0.541	0.117	2.71779e-295	5	NEXN	0	0.580311	0.541	0.117	0	5	NEXN
SH3BGRL1	1.39847e-295	0.578175	0.821	0.545	2.61053e-291	5	SH3BGRL	7.98678e-206	0.578175	0.821	0.545	1.49089e-201	5	SH3BGRL
BGN	4.09432e-286	0.773625	0.783	0.284	7.64287e-282	5	BGN	0	0.773625	0.783	0.284	0	5	BGN
MT1E1	2.26809e-281	0.803716	0.851	0.374	4.23385e-277	5	MT1E	0	0.803716	0.851	0.374	0	5	MT1E
GPX3	1.05975e-276	0.553044	0.803	0.315	1.97823e-272	5	GPX3	0	0.553044	0.803	0.315	0	5	GPX3
EPAS1	3.64145e-275	0.534722	0.549	0.118	6.7975e-271	5	EPAS1	0	0.534722	0.549	0.118	0	5	EPAS1
PDK4	3.2754e-271	0.896174	0.781	0.315	6.11419e-267	5	PDK4	1.72253e-306	0.896174	0.781	0.315	3.21544e-302	5	PDK4
LPP	1.3364e-266	0.566563	0.651	0.329	2.49466e-262	5	LPP	1.08032e-179	0.566563	0.651	0.329	2.01663e-175	5	LPP
CRIP21	5.02744e-265	0.658679	0.761	0.29	9.38473e-261	5	CRIP2	0	0.658679	0.761	0.29	0	5	CRIP2
NUDT41	3.48413e-244	0.597111	0.596	0.216	6.50383e-240	5	NUDT4	3.81487e-248	0.597111	0.596	0.216	7.12122e-244	5	NUDT4
NUPR11	1.18149e-242	0.668739	0.83	0.438	2.20548e-238	5	NUPR1	1.95879e-254	0.668739	0.83	0.438	3.65648e-250	5	NUPR1
COL18A1	7.03008e-240	0.616769	0.605	0.26	1.31231e-235	5	COL18A1	4.32682e-199	0.616769	0.605	0.26	8.07687e-195	5	COL18A1
CD1511	1.29405e-238	0.603316	0.718	0.383	2.4156e-234	5	CD151	1.64094e-192	0.603316	0.718	0.383	3.06314e-188	5	CD151
A2M1	2.23721e-235	0.529482	0.639	0.197	4.17619e-231	5	A2M	4.18038e-292	0.529482	0.639	0.197	7.80352e-288	5	A2M
MAP1B	1.85374e-232	0.575553	0.643	0.223	3.46037e-228	5	MAP1B	3.46362e-281	0.575553	0.643	0.223	6.46554e-277	5	MAP1B
ISYNA11	7.76063e-230	0.544142	0.57	0.217	1.44868e-225	5	ISYNA1	2.397e-220	0.544142	0.57	0.217	4.47447e-216	5	ISYNA1
NDRG2	4.19604e-224	0.541989	0.628	0.222	7.83274e-220	5	NDRG2	1.67326e-265	0.541989	0.628	0.222	3.12347e-261	5	NDRG2
MTHFD2	4.06023e-219	0.519435	0.583	0.198	7.57922e-215	5	MTHFD2	6.0303e-259	0.519435	0.583	0.198	1.12568e-254	5	MTHFD2
LHFP	7.82643e-216	0.5618	0.589	0.179	1.46096e-211	5	LHFP	3.31394e-287	0.5618	0.589	0.179	6.18614e-283	5	LHFP
C12orf572	3.32889e-214	0.508825	0.89	0.661	6.21403e-210	5	C12orf57	8.89592e-186	0.508825	0.89	0.661	1.6606e-181	5	C12orf57
ZBTB16	4.09115e-207	0.526412	0.59	0.196	7.63695e-203	5	ZBTB16	1.38232e-258	0.526412	0.59	0.196	2.58037e-254	5	ZBTB16
MT1X	2.86292e-203	0.834738	0.744	0.359	5.34421e-199	5	MT1X	1.38682e-230	0.834738	0.744	0.359	2.58877e-226	5	MT1X
RHOB	1.10057e-198	0.656045	0.755	0.378	2.05444e-194	5	RHOB	2.17274e-206	0.656045	0.755	0.378	4.05586e-202	5	RHOB
IGFBP51	3.09744e-198	0.824562	0.846	0.502	5.782e-194	5	IGFBP5	1.22478e-203	0.824562	0.846	0.502	2.28629e-199	5	IGFBP5
FKBP51	3.482e-194	0.56531	0.696	0.356	6.49985e-190	5	FKBP5	1.88054e-179	0.56531	0.696	0.356	3.5104e-175	5	FKBP5
CPM	1.43653e-191	0.524779	0.504	0.148	2.68156e-187	5	CPM	1.82855e-253	0.524779	0.504	0.148	3.41335e-249	5	CPM
NR2F2	5.77706e-188	0.508549	0.553	0.206	1.0784e-183	5	NR2F2	1.25718e-207	0.508549	0.553	0.206	2.34679e-203	5	NR2F2
FHL1	1.27996e-184	0.5252	0.568	0.204	2.38929e-180	5	FHL1	3.22092e-225	0.5252	0.568	0.204	6.01248e-221	5	FHL1
CKB2	4.53231e-179	0.588995	0.649	0.274	8.46046e-175	5	CKB	4.2642e-219	0.588995	0.649	0.274	7.95999e-215	5	CKB
CD91	4.39719e-153	0.505376	0.753	0.403	8.20824e-149	5	CD9	9.86514e-172	0.505376	0.753	0.403	1.84153e-167	5	CD9
S100A42	4.90408e-119	0.646064	0.785	0.498	9.15444e-115	5	S100A4	1.66817e-122	0.646064	0.785	0.498	3.11397e-118	5	S100A4
GADD45B	2.46414e-98	0.648756	0.612	0.4	4.59981e-94	5	GADD45B	2.1206e-74	0.648756	0.612	0.4	3.95853e-70	5	GADD45B
CLDN5	0	2.03304	0.739	0.04	0	6	CLDN5	0	2.03304	0.739	0.04	0	6	CLDN5	Endothelial cells
VWF	0	1.82888	0.856	0.021	0	6	VWF	0	1.82888	0.856	0.021	0	6	VWF
RAMP2	0	1.64509	0.905	0.166	0	6	RAMP2	0	1.64509	0.905	0.166	0	6	RAMP2
SPARCL12	0	1.63168	0.896	0.329	0	6	SPARCL1	0	1.63168	0.896	0.329	0	6	SPARCL1
GNG111	0	1.53908	0.946	0.318	0	6	GNG11	0	1.53908	0.946	0.318	0	6	GNG11
RBP7	0	1.42147	0.554	0.053	0	6	RBP7	0	1.42147	0.554	0.053	0	6	RBP7
SDPR	0	1.40423	0.753	0.109	0	6	SDPR	0	1.40423	0.753	0.109	0	6	SDPR
PECAM1	0	1.36907	0.825	0.073	0	6	PECAM1	0	1.36907	0.825	0.073	0	6	PECAM1
EGFL7	0	1.34925	0.841	0.095	0	6	EGFL7	0	1.34925	0.841	0.095	0	6	EGFL7
IFI271	0	1.34541	0.889	0.436	0	6	IFI27	0	1.34541	0.889	0.436	0	6	IFI27
IGFBP72	0	1.3409	0.944	0.72	0	6	IGFBP7	1.98965e-265	1.3409	0.944	0.72	3.71408e-261	6	IGFBP7
A2M2	0	1.33855	0.831	0.192	0	6	A2M	0	1.33855	0.831	0.192	0	6	A2M
AQP1	0	1.32631	0.585	0.056	0	6	AQP1	0	1.32631	0.585	0.056	0	6	AQP1
CLEC14A	0	1.29273	0.759	0.007	0	6	CLEC14A	0	1.29273	0.759	0.007	0	6	CLEC14A
PLVAP	0	1.28385	0.525	0.011	0	6	PLVAP	0	1.28385	0.525	0.011	0	6	PLVAP
ID1	0	1.28139	0.768	0.301	0	6	ID1	0	1.28139	0.768	0.301	0	6	ID1
ECSCR.1	0	1.26374	0.786	0.014	0	6	ECSCR.1	0	1.26374	0.786	0.014	0	6	ECSCR.1
HSPG2	0	1.22552	0.746	0.161	0	6	HSPG2	0	1.22552	0.746	0.161	0	6	HSPG2
NPDC11	0	1.21108	0.818	0.227	0	6	NPDC1	0	1.21108	0.818	0.227	0	6	NPDC1
TM4SF11	0	1.19119	0.872	0.337	0	6	TM4SF1	0	1.19119	0.872	0.337	0	6	TM4SF1
EPAS11	0	1.11791	0.769	0.112	0	6	EPAS1	0	1.11791	0.769	0.112	0	6	EPAS1
CAV12	0	1.11321	0.838	0.302	0	6	CAV1	0	1.11321	0.838	0.302	0	6	CAV1
HLA-E2	0	1.11115	0.988	0.647	0	6	HLA-E	0	1.11115	0.988	0.647	0	6	HLA-E
CD59	0	1.10789	0.914	0.478	0	6	CD59	0	1.10789	0.914	0.478	0	6	CD59
HYAL2	0	1.10439	0.754	0.152	0	6	HYAL2	0	1.10439	0.754	0.152	0	6	HYAL2
ADGRL4	0	1.10172	0.732	0.008	0	6	ADGRL4	0	1.10172	0.732	0.008	0	6	ADGRL4
PCAT19	0	1.07768	0.695	0.02	0	6	PCAT19	0	1.07768	0.695	0.02	0	6	PCAT19
ENG	0	1.0771	0.762	0.198	0	6	ENG	0	1.0771	0.762	0.198	0	6	ENG
FKBP1A	0	1.02025	0.963	0.736	0	6	FKBP1A	0	1.02025	0.963	0.736	0	6	FKBP1A
CRIP22	0	1.01305	0.864	0.29	0	6	CRIP2	0	1.01305	0.864	0.29	0	6	CRIP2
ESAM	0	1.00672	0.684	0.031	0	6	ESAM	0	1.00672	0.684	0.031	0	6	ESAM
EMCN	0	0.972626	0.673	0.007	0	6	EMCN	0	0.972626	0.673	0.007	0	6	EMCN
PTPRB	0	0.932127	0.617	0.005	0	6	PTPRB	0	0.932127	0.617	0.005	0	6	PTPRB
RAMP3	0	0.929494	0.527	0.006	0	6	RAMP3	0	0.929494	0.527	0.006	0	6	RAMP3
CD93	0	0.921904	0.638	0.059	0	6	CD93	0	0.921904	0.638	0.059	0	6	CD93
STOM	0	0.903857	0.762	0.253	0	6	STOM	0	0.903857	0.762	0.253	0	6	STOM
PALMD	0	0.895401	0.63	0.049	0	6	PALMD	0	0.895401	0.63	0.049	0	6	PALMD
ICAM2	0	0.884297	0.58	0.064	0	6	ICAM2	0	0.884297	0.58	0.064	0	6	ICAM2
LDB2	0	0.853847	0.705	0.076	0	6	LDB2	0	0.853847	0.705	0.076	0	6	LDB2
LIFR	0	0.835095	0.541	0.085	0	6	LIFR	0	0.835095	0.541	0.085	0	6	LIFR
GIMAP7	0	0.830903	0.643	0.09	0	6	GIMAP7	0	0.830903	0.643	0.09	0	6	GIMAP7
MGST2	0	0.793218	0.761	0.255	0	6	MGST2	0	0.793218	0.761	0.255	0	6	MGST2
CXorf36	0	0.782153	0.557	0.004	0	6	CXorf36	0	0.782153	0.557	0.004	0	6	CXorf36
CALCRL	0	0.77375	0.588	0.037	0	6	CALCRL	0	0.77375	0.588	0.037	0	6	CALCRL
TSPAN7	0	0.773694	0.548	0.04	0	6	TSPAN7	0	0.773694	0.548	0.04	0	6	TSPAN7
TGFBR2	0	0.747806	0.68	0.194	0	6	TGFBR2	0	0.747806	0.68	0.194	0	6	TGFBR2
CD34	0	0.731005	0.532	0.061	0	6	CD34	0	0.731005	0.532	0.061	0	6	CD34
SPTBN1	0	0.713167	0.676	0.245	0	6	SPTBN1	4.83801e-286	0.713167	0.676	0.245	9.03112e-282	6	SPTBN1
CDH5	0	0.708432	0.518	0.012	0	6	CDH5	0	0.708432	0.518	0.012	0	6	CDH5
JAM2	0	0.705735	0.526	0.073	0	6	JAM2	0	0.705735	0.526	0.073	0	6	JAM2
MTUS1	0	0.691074	0.614	0.142	0	6	MTUS1	0	0.691074	0.614	0.142	0	6	MTUS1
MMRN2	0	0.659055	0.512	0.011	0	6	MMRN2	0	0.659055	0.512	0.011	0	6	MMRN2
ADAM15	0	0.658391	0.557	0.128	0	6	ADAM15	0	0.658391	0.557	0.128	0	6	ADAM15
CCDC85B	0	0.653397	0.719	0.4	0	6	CCDC85B	4.60903e-181	0.653397	0.719	0.4	8.60368e-177	6	CCDC85B
NRN1	0	0.652996	0.51	0.011	0	6	NRN1	0	0.652996	0.51	0.011	0	6	NRN1
TIE1	0	0.639799	0.512	0.009	0	6	TIE1	0	0.639799	0.512	0.009	0	6	TIE1
S1PR1	0	0.621308	0.51	0.015	0	6	S1PR1	0	0.621308	0.51	0.015	0	6	S1PR1
CYYR1	0	0.610708	0.529	0.039	0	6	CYYR1	0	0.610708	0.529	0.039	0	6	CYYR1
TMEM204	0	0.604654	0.502	0.064	0	6	TMEM204	0	0.604654	0.502	0.064	0	6	TMEM204
APP	2.67364e-319	0.759004	0.848	0.445	4.990876774e-315	6	APP	4.39137e-259	0.759004	0.848	0.445	8.19737e-255	6	APP
RNASE1	1.47356373e-316	0.765334	0.823	0.251	2.75070142084e-312	6	RNASE1	0	0.765334	0.823	0.251	0	6	RNASE1
ARHGAP29	3.11052154876e-313	0.662392	0.621	0.171	0	6	ARHGAP29	0	0.662392	0.621	0.171	0	6	ARHGAP29
SPRY1	1.99276e-295	0.869215	0.618	0.3	3.71989e-291	6	SPRY1	1.28536e-163	0.869215	0.618	0.3	2.39938e-159	6	SPRY1
RAB11A	6.22108e-282	0.560547	0.67	0.326	1.16129e-277	6	RAB11A	1.01199e-175	0.560547	0.67	0.326	1.88909e-171	6	RAB11A
VAMP51	1.77707e-281	0.730626	0.809	0.337	3.31726e-277	6	VAMP5	1.11713e-303	0.730626	0.809	0.337	2.08534e-299	6	VAMP5
TCF4	7.48796e-277	0.719855	0.745	0.365	1.39778e-272	6	TCF4	8.90013e-221	0.719855	0.745	0.365	1.66139e-216	6	TCF4
TINAGL11	1.37304e-274	0.629602	0.546	0.092	2.56306e-270	6	TINAGL1	0	0.629602	0.546	0.092	0	6	TINAGL1
ELK3	2.93465e-274	0.508035	0.51	0.124	5.47812e-270	6	ELK3	1.24555e-294	0.508035	0.51	0.124	2.32508e-290	6	ELK3
EMP1	1.09116e-271	0.784433	0.717	0.251	2.03688e-267	6	EMP1	1.04868e-294	0.784433	0.717	0.251	1.95756e-290	6	EMP1
PRCP	1.60883e-268	0.582276	0.512	0.226	3.0032e-264	6	PRCP	8.92401e-135	0.582276	0.512	0.226	1.66584e-130	6	PRCP
PDLIM12	5.05073e-265	0.747879	0.768	0.322	9.42821e-261	6	PDLIM1	3.72079e-264	0.747879	0.768	0.322	6.94559e-260	6	PDLIM1
GIMAP4	7.71775e-265	0.596747	0.628	0.141	1.44067e-260	6	GIMAP4	0	0.596747	0.628	0.141	0	6	GIMAP4
CDC37	1.21622e-254	0.514973	0.708	0.39	2.27032e-250	6	CDC37	1.99996e-161	0.514973	0.708	0.39	3.73332e-157	6	CDC37
ID32	1.25824e-249	0.993493	0.8	0.389	2.34876e-245	6	ID3	2.48549e-239	0.993493	0.8	0.389	4.63967e-235	6	ID3
CAV21	2.75103e-245	0.599342	0.624	0.178	5.13534e-241	6	CAV2	6.70243e-307	0.599342	0.624	0.178	1.25114e-302	6	CAV2
PTRF2	2.30725e-242	0.705057	0.779	0.358	4.30695e-238	6	PTRF	4.52075e-236	0.705057	0.779	0.358	8.43888e-232	6	PTRF
KLF2	5.40166e-230	0.626969	0.517	0.129	1.00833e-225	6	KLF2	3.1572e-287	0.626969	0.517	0.129	5.89355e-283	6	KLF2
TIMP31	3.80713e-228	0.927569	0.739	0.285	7.10677e-224	6	TIMP3	1.53554e-258	0.927569	0.739	0.285	2.8664e-254	6	TIMP3
IGFBP41	6.06859e-217	0.681132	0.657	0.26	1.13282e-212	6	IGFBP4	3.66017e-219	0.681132	0.657	0.26	6.83245e-215	6	IGFBP4
BCAM2	2.8208e-214	0.531843	0.745	0.263	5.26559e-210	6	BCAM	1.32469e-239	0.531843	0.745	0.263	2.47281e-235	6	BCAM
ARL4A1	1.46782e-212	0.593639	0.583	0.216	2.73998e-208	6	ARL4A	2.71787e-201	0.593639	0.583	0.216	5.07345e-197	6	ARL4A
RDX	2.13688e-211	0.514728	0.589	0.298	3.98891e-207	6	RDX	1.26075e-127	0.514728	0.589	0.298	2.35343e-123	6	RDX
TACC1	1.31317e-208	0.594416	0.657	0.293	2.4513e-204	6	TACC1	4.2485e-185	0.594416	0.657	0.293	7.93068e-181	6	TACC1
TXNIP1	1.34415e-206	0.726699	0.927	0.709	2.50913e-202	6	TXNIP	3.12449e-172	0.726699	0.927	0.709	5.83248e-168	6	TXNIP
SEPW12	4.75791e-206	0.596749	0.799	0.562	8.88158e-202	6	SEPW1	1.66696e-130	0.596749	0.799	0.562	3.11171e-126	6	SEPW1
IFITM2	1.88985e-200	0.569164	0.979	0.772	3.52778e-196	6	IFITM2	1.32693e-189	0.569164	0.979	0.772	2.47698e-185	6	IFITM2
NFIB	5.0238e-200	0.584604	0.665	0.274	9.37793e-196	6	NFIB	4.5005e-207	0.584604	0.665	0.274	8.40109e-203	6	NFIB
MYH9	1.50647e-188	0.531376	0.678	0.318	2.81212e-184	6	MYH9	2.65852e-176	0.531376	0.678	0.318	4.96267e-172	6	MYH9
RHOC	6.07745e-187	0.518721	0.759	0.493	1.13448e-182	6	RHOC	2.09198e-131	0.518721	0.759	0.493	3.9051e-127	6	RHOC
ITM2A	7.95806e-182	0.543646	0.627	0.2	1.48553e-177	6	ITM2A	1.78873e-226	0.543646	0.627	0.2	3.33902e-222	6	ITM2A
ARL6IP1	2.12793e-179	0.622393	0.667	0.407	3.9722e-175	6	ARL6IP1	3.84958e-114	0.622393	0.667	0.407	7.18602e-110	6	ARL6IP1
SNCG1	5.1769e-179	0.563121	0.565	0.163	9.66373e-175	6	SNCG	7.68322e-250	0.563121	0.565	0.163	1.43423e-245	6	SNCG
IL6ST	2.86196e-175	0.582328	0.626	0.269	5.34243e-171	6	IL6ST	1.31034e-172	0.582328	0.626	0.269	2.44602e-168	6	IL6ST
PRSS23	6.19905e-170	0.677598	0.599	0.226	1.15718e-165	6	PRSS23	1.35716e-195	0.677598	0.599	0.226	2.53341e-191	6	PRSS23
CNN31	2.2124e-128	0.519154	0.694	0.429	4.12989e-124	6	CNN3	9.67022e-107	0.519154	0.694	0.429	1.80514e-102	6	CNN3
KCTD121	3.05027e-114	0.518238	0.55	0.277	5.69394e-110	6	KCTD12	1.13863e-102	0.518238	0.55	0.277	2.12548e-98	6	KCTD12
KLF4	7.14503e-108	0.575009	0.534	0.248	1.33376e-103	6	KLF4	2.20859e-112	0.575009	0.534	0.248	4.12277e-108	6	KLF4
MGP1	6.92247e-105	0.676471	0.817	0.511	1.29222e-100	6	MGP	8.48392e-112	0.676471	0.817	0.511	1.58369e-107	6	MGP
SOCS3	6.70801e-101	0.649324	0.57	0.361	1.25218e-96	6	SOCS3	1.81222e-68	0.649324	0.57	0.361	3.38288e-64	6	SOCS3
IGKC	0	6.61555	0.977	0.362	0	7	IGKC	1.73584e-231	6.61555	0.977	0.362	3.24029e-227	7	IGKC	B & Plasma cells
IGLC2	0	5.89997	0.863	0.165	0	7	IGLC2	2.91716e-272	5.89997	0.863	0.165	5.44546e-268	7	IGLC2
IGHG3	0	5.88549	0.983	0.113	0	7	IGHG3	0	5.88549	0.983	0.113	0	7	IGHG3
IGHG1	0	5.84576	0.967	0.077	0	7	IGHG1	0	5.84576	0.967	0.077	0	7	IGHG1
IGLC3	0	5.68601	0.806	0.106	0	7	IGLC3	0	5.68601	0.806	0.106	0	7	IGLC3
IGHG4	0	4.84751	0.973	0.102	0	7	IGHG4	0	4.84751	0.973	0.102	0	7	IGHG4
IGHG2	0	4.70823	0.94	0.024	0	7	IGHG2	0	4.70823	0.94	0.024	0	7	IGHG2
JCHAIN	0	3.71039	0.916	0.052	0	7	JCHAIN	0	3.71039	0.916	0.052	0	7	JCHAIN
IGHGP	0	3.31929	0.91	0.009	0	7	IGHGP	0	3.31929	0.91	0.009	0	7	IGHGP
MZB1	0	2.91633	0.993	0.021	0	7	MZB1	0	2.91633	0.993	0.021	0	7	MZB1
XBP1	0	2.25572	0.997	0.408	0	7	XBP1	2.95214e-234	2.25572	0.997	0.408	5.51075e-230	7	XBP1
DERL3	0	2.03823	0.983	0.034	0	7	DERL3	0	2.03823	0.983	0.034	0	7	DERL3
SSR4	0	2.01919	1	0.792	0	7	SSR4	4.27762e-199	2.01919	1	0.792	7.98504e-195	7	SSR4
SEC11C	0	1.62159	0.967	0.228	0	7	SEC11C	0	1.62159	0.967	0.228	0	7	SEC11C
FKBP11	0	1.5696	0.98	0.196	0	7	FKBP11	0	1.5696	0.98	0.196	0	7	FKBP11
IGLV3-1	0	1.44879	0.625	0.001	0	7	IGLV3-1	0	1.44879	0.625	0.001	0	7	IGLV3-1
CD79A	0	1.42351	0.913	0.011	0	7	CD79A	0	1.42351	0.913	0.011	0	7	CD79A
SPCS3	0	1.10414	0.92	0.222	0	7	SPCS3	3.99222e-248	1.10414	0.92	0.222	7.45227e-244	7	SPCS3
JSRP1	0	1.05088	0.749	0.003	0	7	JSRP1	0	1.05088	0.749	0.003	0	7	JSRP1
FCRL5	0	0.789326	0.712	0.002	0	7	FCRL5	0	0.789326	0.712	0.002	0	7	FCRL5
POU2AF1	4.57012e-293	0.611006	0.622	0.006	8.53105e-289	7	POU2AF1	0	0.611006	0.622	0.006	0	7	POU2AF1
PIM2	1.51092e-291	1.12271	0.783	0.046	2.82044e-287	7	PIM2	0	1.12271	0.783	0.046	0	7	PIM2
PRDX4	3.8983e-258	0.974844	0.946	0.39	7.27695e-254	7	PRDX4	8.4443e-162	0.974844	0.946	0.39	1.5763e-157	7	PRDX4
FAM46C	7.5575e-227	0.692132	0.692	0.032	1.41076e-222	7	FAM46C	0	0.692132	0.692	0.032	0	7	FAM46C
ERLEC1	1.92668e-197	0.804085	0.863	0.29	3.59653e-193	7	ERLEC1	1.57826e-144	0.804085	0.863	0.29	2.94613e-140	7	ERLEC1
PLPP5	1.27583e-195	0.737246	0.719	0.137	2.3816e-191	7	PLPP5	2.69793e-203	0.737246	0.719	0.137	5.03622e-199	7	PLPP5
SDF2L1	2.76553e-179	0.903251	0.863	0.258	5.16242e-175	7	SDF2L1	4.69092e-162	0.903251	0.863	0.258	8.75653e-158	7	SDF2L1
UBE2J1	2.91357e-176	0.776863	0.786	0.21	5.43875e-172	7	UBE2J1	3.54575e-156	0.776863	0.786	0.21	6.61884e-152	7	UBE2J1
FKBP21	1.26445e-165	0.832251	0.936	0.517	2.36034e-161	7	FKBP2	1.41579e-102	0.832251	0.936	0.517	2.64286e-98	7	FKBP2
SEL1L3	1.49459e-164	0.619697	0.682	0.066	2.78995e-160	7	SEL1L3	0	0.619697	0.682	0.066	0	7	SEL1L3
ISG201	3.36143e-149	0.845226	0.826	0.151	6.27479e-145	7	ISG20	9.62825e-232	0.845226	0.826	0.151	1.79731e-227	7	ISG20
CD27	1.28336e-147	0.676073	0.562	0.038	2.39566e-143	7	CD27	0	0.676073	0.562	0.038	0	7	CD27
PDK1	1.91077e-143	0.543689	0.572	0.051	3.56684e-139	7	PDK1	0	0.543689	0.572	0.051	0	7	PDK1
IGHA1	1.66255e-138	3.90519	0.512	0.092	3.10348e-134	7	IGHA1	2.39335e-140	3.90519	0.512	0.092	4.46767e-136	7	IGHA1
CRELD2	3.45819e-135	0.704587	0.763	0.217	6.4554e-131	7	CRELD2	5.38728e-134	0.704587	0.763	0.217	1.00564e-129	7	CRELD2
SEL1L	1.52379e-134	0.579816	0.699	0.132	2.84447e-130	7	SEL1L	2.14178e-188	0.579816	0.699	0.132	3.99807e-184	7	SEL1L
SPCS2	8.9439e-129	0.689125	0.943	0.481	1.66956e-124	7	SPCS2	5.25535e-102	0.689125	0.943	0.481	9.81016e-98	7	SPCS2
PRDM1	6.01984e-128	0.795733	0.699	0.116	1.12372e-123	7	PRDM1	5.72958e-214	0.795733	0.699	0.116	1.06954e-209	7	PRDM1
HERPUD11	3.40804e-120	0.989434	0.953	0.509	6.36178e-116	7	HERPUD1	3.27401e-109	0.989434	0.953	0.509	6.11159e-105	7	HERPUD1
VIMP	3.4213e-116	0.692912	0.863	0.386	6.38655e-112	7	VIMP	2.46415e-100	0.692912	0.863	0.386	4.59983e-96	7	VIMP
ITM2C1	7.95203e-116	0.857045	0.926	0.356	1.48441e-111	7	ITM2C	3.03586e-124	0.857045	0.926	0.356	5.66704e-120	7	ITM2C
TPD52	6.01211e-107	0.515031	0.649	0.111	1.12228e-102	7	TPD52	3.92226e-185	0.515031	0.649	0.111	7.32168e-181	7	TPD52
DNAJB9	2.10746e-106	0.632718	0.766	0.222	3.93399e-102	7	DNAJB9	3.81989e-127	0.632718	0.766	0.222	7.13058e-123	7	DNAJB9
MANF	1.5398e-100	0.652797	0.826	0.332	2.87435e-96	7	MANF	8.88882e-94	0.652797	0.826	0.332	1.65928e-89	7	MANF
CYBA2	2.45479e-100	0.777899	0.993	0.708	4.58236e-96	7	CYBA	1.24892e-91	0.777899	0.993	0.708	2.33136e-87	7	CYBA
SPCS11	1.6267e-86	0.569246	0.94	0.605	3.03656e-82	7	SPCS1	2.37463e-70	0.569246	0.94	0.605	4.43272e-66	7	SPCS1
SELK	1.78866e-85	0.630262	0.92	0.509	3.33888e-81	7	SELK	7.46469e-76	0.630262	0.92	0.509	1.39343e-71	7	SELK
SSR3	1.38451e-69	0.55032	0.873	0.503	2.58447e-65	7	SSR3	4.07711e-60	0.55032	0.873	0.503	7.61075e-56	7	SSR3
HSP90B1	6.79349e-67	0.702836	0.943	0.628	1.26814e-62	7	HSP90B1	4.59745e-54	0.702836	0.943	0.628	8.58205e-50	7	HSP90B1
LINC00152	2.41183e-31	0.530551	0.505	0.244	4.50217e-27	7	LINC00152	3.2499e-28	0.530551	0.505	0.244	6.06658e-24	7	LINC00152

## Sheet: 1-6
Table 1-6. The DEGs for each cluster in PDAC
	p_val_mast	avg_logFC_mast	pct.1_mast	pct.2_mast	p_val_adj_mast	cluster_mast	gene_mast	p_val_wilcox	avg_logFC_wilcox	pct.1_wilcox	pct.2_wilcox	p_val_adj_wilcox	cluster_wilcox	gene_wilcox
TFF1	0	2.81249	0.703	0.182	0	0	TFF1	0	2.81249	0.703	0.182	0	0	TFF1	Ductal_2 cells
FXYD3	0	2.64414	0.956	0.245	0	0	FXYD3	0	2.64414	0.956	0.245	0	0	FXYD3
TFF2	0	2.31135	0.661	0.106	0	0	TFF2	0	2.31135	0.661	0.106	0	0	TFF2
TFF3	0	2.2982	0.655	0.161	0	0	TFF3	0	2.2982	0.655	0.161	0	0	TFF3
C19orf33	0	2.23244	0.957	0.159	0	0	C19orf33	0	2.23244	0.957	0.159	0	0	C19orf33
KRT19	0	2.23028	0.987	0.453	0	0	KRT19	0	2.23028	0.987	0.453	0	0	KRT19
LCN2	0	2.1985	0.806	0.248	0	0	LCN2	0	2.1985	0.806	0.248	0	0	LCN2
AGR2	0	1.90891	0.878	0.255	0	0	AGR2	0	1.90891	0.878	0.255	0	0	AGR2
CEACAM6	0	1.79991	0.663	0.101	0	0	CEACAM6	0	1.79991	0.663	0.101	0	0	CEACAM6
LGALS4	0	1.74011	0.825	0.253	0	0	LGALS4	0	1.74011	0.825	0.253	0	0	LGALS4
S100P	0	1.73051	0.764	0.099	0	0	S100P	0	1.73051	0.764	0.099	0	0	S100P
SLPI	0	1.70639	0.897	0.241	0	0	SLPI	0	1.70639	0.897	0.241	0	0	SLPI
MUC1	0	1.65035	0.911	0.209	0	0	MUC1	0	1.65035	0.911	0.209	0	0	MUC1
C15orf48	0	1.58517	0.763	0.195	0	0	C15orf48	0	1.58517	0.763	0.195	0	0	C15orf48
WFDC2	0	1.54251	0.761	0.241	0	0	WFDC2	0	1.54251	0.761	0.241	0	0	WFDC2
SPINK1	0	1.54212	0.894	0.668	0	0	SPINK1	0	1.54212	0.894	0.668	0	0	SPINK1
CTSE	0	1.49822	0.738	0.082	0	0	CTSE	0	1.49822	0.738	0.082	0	0	CTSE
PDZK1IP1	0	1.44224	0.783	0.196	0	0	PDZK1IP1	0	1.44224	0.783	0.196	0	0	PDZK1IP1
TSPAN8	0	1.43479	0.858	0.371	0	0	TSPAN8	0	1.43479	0.858	0.371	0	0	TSPAN8
CLDN18	0	1.41945	0.551	0.051	0	0	CLDN18	0	1.41945	0.551	0.051	0	0	CLDN18
GPX2	0	1.39243	0.71	0.133	0	0	GPX2	0	1.39243	0.71	0.133	0	0	GPX2
CLDN4	0	1.37593	0.896	0.264	0	0	CLDN4	0	1.37593	0.896	0.264	0	0	CLDN4
SMIM22	0	1.33684	0.948	0.296	0	0	SMIM22	0	1.33684	0.948	0.296	0	0	SMIM22
MMP7	0	1.30974	0.753	0.463	0	0	MMP7	0	1.30974	0.753	0.463	0	0	MMP7
SPINT2	0	1.30451	0.977	0.513	0	0	SPINT2	0	1.30451	0.977	0.513	0	0	SPINT2
KRT7	0	1.29216	0.858	0.298	0	0	KRT7	0	1.29216	0.858	0.298	0	0	KRT7
TSPAN1	0	1.29021	0.804	0.067	0	0	TSPAN1	0	1.29021	0.804	0.067	0	0	TSPAN1
SERPINA1	0	1.28931	0.654	0.415	0	0	SERPINA1	0	1.28931	0.654	0.415	0	0	SERPINA1
LGALS3	0	1.28689	0.968	0.58	0	0	LGALS3	0	1.28689	0.968	0.58	0	0	LGALS3
LSR	0	1.27615	0.782	0.177	0	0	LSR	0	1.27615	0.782	0.177	0	0	LSR
ELF3	0	1.25907	0.923	0.411	0	0	ELF3	0	1.25907	0.923	0.411	0	0	ELF3
S100A14	0	1.24621	0.751	0.166	0	0	S100A14	0	1.24621	0.751	0.166	0	0	S100A14
LYZ	0	1.24306	0.871	0.402	0	0	LYZ	0	1.24306	0.871	0.402	0	0	LYZ
PIGR	0	1.19611	0.6	0.154	0	0	PIGR	0	1.19611	0.6	0.154	0	0	PIGR
KRT8	0	1.18871	0.984	0.576	0	0	KRT8	0	1.18871	0.984	0.576	0	0	KRT8
TMC5	0	1.16016	0.773	0.056	0	0	TMC5	0	1.16016	0.773	0.056	0	0	TMC5
CYSTM1	0	1.15877	0.916	0.636	0	0	CYSTM1	0	1.15877	0.916	0.636	0	0	CYSTM1
GPRC5A	0	1.12542	0.757	0.081	0	0	GPRC5A	0	1.12542	0.757	0.081	0	0	GPRC5A
OCIAD2	0	1.07545	0.899	0.394	0	0	OCIAD2	0	1.07545	0.899	0.394	0	0	OCIAD2
MAL2	0	1.062	0.82	0.162	0	0	MAL2	0	1.062	0.82	0.162	0	0	MAL2
TACSTD2	0	1.05609	0.834	0.349	0	0	TACSTD2	0	1.05609	0.834	0.349	0	0	TACSTD2
KRT18	0	1.03355	0.964	0.532	0	0	KRT18	0	1.03355	0.964	0.532	0	0	KRT18
NQO1	0	1.02643	0.78	0.174	0	0	NQO1	0	1.02643	0.78	0.174	0	0	NQO1
EPCAM	0	1.01635	0.947	0.386	0	0	EPCAM	0	1.01635	0.947	0.386	0	0	EPCAM
FXYD2	0	2.95681	0.991	0.387	0	1	FXYD2	0	2.95681	0.991	0.387	0	1	FXYD2	Ductal_1 cells
SLC4A4	0	2.26837	0.978	0.203	0	1	SLC4A4	0	2.26837	0.978	0.203	0	1	SLC4A4
CLU	0	2.25987	0.983	0.507	0	1	CLU	0	2.25987	0.983	0.507	0	1	CLU
ANXA4	0	2.02822	0.998	0.644	0	1	ANXA4	0	2.02822	0.998	0.644	0	1	ANXA4
CLDN10	0	1.87673	0.976	0.241	0	1	CLDN10	0	1.87673	0.976	0.241	0	1	CLDN10
LEFTY1	0	1.8608	0.79	0.096	0	1	LEFTY1	0	1.8608	0.79	0.096	0	1	LEFTY1
AMBP	0	1.82073	0.875	0.091	0	1	AMBP	0	1.82073	0.875	0.091	0	1	AMBP
DEFB1	0	1.80734	0.983	0.311	0	1	DEFB1	0	1.80734	0.983	0.311	0	1	DEFB1
CFTR	0	1.70507	0.958	0.188	0	1	CFTR	0	1.70507	0.958	0.188	0	1	CFTR
GMNN	0	1.60173	0.853	0.168	0	1	GMNN	0	1.60173	0.853	0.168	0	1	GMNN
ATP1A1	0	1.51723	0.993	0.69	0	1	ATP1A1	0	1.51723	0.993	0.69	0	1	ATP1A1
SLC3A1	0	1.39558	0.807	0.107	0	1	SLC3A1	0	1.39558	0.807	0.107	0	1	SLC3A1
BEX1	0	1.35751	0.721	0.078	0	1	BEX1	0	1.35751	0.721	0.078	0	1	BEX1
CCND1	0	1.34952	0.828	0.325	0	1	CCND1	0	1.34952	0.828	0.325	0	1	CCND1
SERPINA5	0	1.34811	0.856	0.091	0	1	SERPINA5	0	1.34811	0.856	0.091	0	1	SERPINA5
MT1F	0	1.34355	0.906	0.256	0	1	MT1F	0	1.34355	0.906	0.256	0	1	MT1F
SH3YL1	0	1.27656	0.904	0.262	0	1	SH3YL1	0	1.27656	0.904	0.262	0	1	SH3YL1
SCTR	0	1.2141	0.85	0.137	0	1	SCTR	0	1.2141	0.85	0.137	0	1	SCTR
RBP1	0	1.18493	0.929	0.289	0	1	RBP1	0	1.18493	0.929	0.289	0	1	RBP1
PEBP1	0	1.16733	0.991	0.73	0	1	PEBP1	0	1.16733	0.991	0.73	0	1	PEBP1
SFRP5	0	1.15311	0.779	0.08	0	1	SFRP5	0	1.15311	0.779	0.08	0	1	SFRP5
ATP1B11	0	1.15172	0.95	0.418	0	1	ATP1B1	0	1.15172	0.95	0.418	0	1	ATP1B1
SORBS2	0	1.15139	0.91	0.284	0	1	SORBS2	0	1.15139	0.91	0.284	0	1	SORBS2
C12orf751	0	1.07707	0.952	0.443	0	1	C12orf75	0	1.07707	0.952	0.443	0	1	C12orf75
CITED4	0	1.0612	0.776	0.129	0	1	CITED4	0	1.0612	0.776	0.129	0	1	CITED4
SOD3	0	1.01654	0.93	0.3	0	1	SOD3	0	1.01654	0.93	0.3	0	1	SOD3
UGT2A3	0	1.01243	0.755	0.075	0	1	UGT2A3	0	1.01243	0.755	0.075	0	1	UGT2A3
PLVAP	0	2.52804	0.978	0.211	0	2	PLVAP	0	2.52804	0.978	0.211	0	2	PLVAP	Endothelial cells
FABP5	0	2.37768	0.936	0.466	0	2	FABP5	0	2.37768	0.936	0.466	0	2	FABP5
SPRY1	0	2.212	0.899	0.216	0	2	SPRY1	0	2.212	0.899	0.216	0	2	SPRY1
RAMP2	0	2.10433	0.971	0.109	0	2	RAMP2	0	2.10433	0.971	0.109	0	2	RAMP2
RGCC	0	1.94448	0.82	0.299	0	2	RGCC	0	1.94448	0.82	0.299	0	2	RGCC
CD320	0	1.85312	0.816	0.19	0	2	CD320	0	1.85312	0.816	0.19	0	2	CD320
SDPR	0	1.82507	0.862	0.101	0	2	SDPR	0	1.82507	0.862	0.101	0	2	SDPR
GNG11	0	1.69271	0.99	0.434	0	2	GNG11	0	1.69271	0.99	0.434	0	2	GNG11
SLC9A3R2	0	1.68569	0.842	0.23	0	2	SLC9A3R2	0	1.68569	0.842	0.23	0	2	SLC9A3R2
CLDN5	0	1.68299	0.68	0.066	0	2	CLDN5	0	1.68299	0.68	0.066	0	2	CLDN5
A2M	0	1.56074	0.988	0.362	0	2	A2M	0	1.56074	0.988	0.362	0	2	A2M
EPAS1	0	1.5604	0.961	0.273	0	2	EPAS1	0	1.5604	0.961	0.273	0	2	EPAS1
VWF	0	1.49544	0.818	0.085	0	2	VWF	0	1.49544	0.818	0.085	0	2	VWF
RAMP3	0	1.48761	0.851	0.062	0	2	RAMP3	0	1.48761	0.851	0.062	0	2	RAMP3
PPAP2A	0	1.48725	0.85	0.23	0	2	PPAP2A	0	1.48725	0.85	0.23	0	2	PPAP2A
SPARCL1	0	1.4743	0.994	0.424	0	2	SPARCL1	0	1.4743	0.994	0.424	0	2	SPARCL1
COL15A1	0	1.46833	0.813	0.137	0	2	COL15A1	0	1.46833	0.813	0.137	0	2	COL15A1
HYAL2	0	1.46195	0.88	0.178	0	2	HYAL2	0	1.46195	0.88	0.178	0	2	HYAL2
GSN	0	1.45799	0.981	0.667	0	2	GSN	0	1.45799	0.981	0.667	0	2	GSN
CLEC14A	0	1.40432	0.857	0.038	0	2	CLEC14A	0	1.40432	0.857	0.038	0	2	CLEC14A
RBP7	0	1.3965	0.705	0.056	0	2	RBP7	0	1.3965	0.705	0.056	0	2	RBP7
HSPG2	0	1.37725	0.874	0.312	0	2	HSPG2	0	1.37725	0.874	0.312	0	2	HSPG2
TGFBR2	0	1.36475	0.907	0.271	0	2	TGFBR2	0	1.36475	0.907	0.271	0	2	TGFBR2
SLCO2A1	0	1.33702	0.824	0.066	0	2	SLCO2A1	0	1.33702	0.824	0.066	0	2	SLCO2A1
TMEM88	0	1.33245	0.804	0.048	0	2	TMEM88	0	1.33245	0.804	0.048	0	2	TMEM88
EGFL7	0	1.29653	0.854	0.131	0	2	EGFL7	0	1.29653	0.854	0.131	0	2	EGFL7
AC011526.1	0	1.29199	0.855	0.041	0	2	AC011526.1	0	1.29199	0.855	0.041	0	2	AC011526.1
EMCN	0	1.28215	0.844	0.037	0	2	EMCN	0	1.28215	0.844	0.037	0	2	EMCN
CD93	0	1.2757	0.799	0.094	0	2	CD93	0	1.2757	0.799	0.094	0	2	CD93
SOCS3	0	1.27143	0.742	0.251	0	2	SOCS3	0	1.27143	0.742	0.251	0	2	SOCS3
ENG	0	1.26873	0.881	0.194	0	2	ENG	0	1.26873	0.881	0.194	0	2	ENG
GIMAP7	0	1.25834	0.809	0.105	0	2	GIMAP7	0	1.25834	0.809	0.105	0	2	GIMAP7
LIFR	0	1.23601	0.695	0.067	0	2	LIFR	0	1.23601	0.695	0.067	0	2	LIFR
RDX	0	1.22965	0.892	0.341	0	2	RDX	0	1.22965	0.892	0.341	0	2	RDX
AQP11	0	1.22349	0.897	0.327	0	2	AQP1	0	1.22349	0.897	0.327	0	2	AQP1
EMP1	0	1.19049	0.747	0.296	0	2	EMP1	0	1.19049	0.747	0.296	0	2	EMP1
NPDC1	0	1.16942	0.894	0.271	0	2	NPDC1	0	1.16942	0.894	0.271	0	2	NPDC1
TCF4	0	1.16565	0.875	0.255	0	2	TCF4	0	1.16565	0.875	0.255	0	2	TCF4
HLA-E	0	1.16435	0.996	0.764	0	2	HLA-E	0	1.16435	0.996	0.764	0	2	HLA-E
CRIP2	0	1.15516	0.955	0.451	0	2	CRIP2	0	1.15516	0.955	0.451	0	2	CRIP2
IFI271	0	1.14801	0.998	0.724	0	2	IFI27	0	1.14801	0.998	0.724	0	2	IFI27
ELTD1	0	1.14589	0.792	0.033	0	2	ELTD1	0	1.14589	0.792	0.033	0	2	ELTD1
CD36	0	1.14371	0.586	0.102	0	2	CD36	0	1.14371	0.586	0.102	0	2	CD36
ID1	0	1.13471	0.767	0.333	0	2	ID1	0	1.13471	0.767	0.333	0	2	ID1
APOLD1	0	1.12772	0.755	0.144	0	2	APOLD1	0	1.12772	0.755	0.144	0	2	APOLD1
S1PR1	0	1.10966	0.754	0.045	0	2	S1PR1	0	1.10966	0.754	0.045	0	2	S1PR1
ECSCR	0	1.10879	0.764	0.031	0	2	ECSCR	0	1.10879	0.764	0.031	0	2	ECSCR
PODXL	0	1.09	0.719	0.1	0	2	PODXL	0	1.09	0.719	0.1	0	2	PODXL
IFITM1	0	1.08433	0.869	0.341	0	2	IFITM1	0	1.08433	0.869	0.341	0	2	IFITM1
CALCRL	0	1.06665	0.716	0.043	0	2	CALCRL	0	1.06665	0.716	0.043	0	2	CALCRL
FKBP1A	0	1.05948	0.977	0.744	0	2	FKBP1A	0	1.05948	0.977	0.744	0	2	FKBP1A
CDH5	0	1.05468	0.696	0.031	0	2	CDH5	0	1.05468	0.696	0.031	0	2	CDH5
CAV1	0	1.05054	0.886	0.359	0	2	CAV1	0	1.05054	0.886	0.359	0	2	CAV1
ESAM	0	1.04281	0.794	0.117	0	2	ESAM	0	1.04281	0.794	0.117	0	2	ESAM
RNASE1	0	1.0412	0.884	0.256	0	2	RNASE1	0	1.0412	0.884	0.256	0	2	RNASE1
GIMAP4	0	1.03791	0.803	0.129	0	2	GIMAP4	0	1.03791	0.803	0.129	0	2	GIMAP4
IGFBP4	0	1.02843	0.952	0.428	0	2	IGFBP4	0	1.02843	0.952	0.428	0	2	IGFBP4
TIMP3	0	1.02207	0.906	0.345	0	2	TIMP3	0	1.02207	0.906	0.345	0	2	TIMP3
C8orf4	0	1.01984	0.75	0.406	0	2	C8orf4	0	1.01984	0.75	0.406	0	2	C8orf4
JAM2	0	1.0115	0.711	0.048	0	2	JAM2	0	1.0115	0.711	0.048	0	2	JAM2
PPAP2B	0	1.00276	0.722	0.187	0	2	PPAP2B	0	1.00276	0.722	0.187	0	2	PPAP2B
TSC22D1	0	1.00175	0.918	0.549	0	2	TSC22D1	0	1.00175	0.918	0.549	0	2	TSC22D1
FAM107A	0	1.00084	0.662	0.057	0	2	FAM107A	0	1.00084	0.662	0.057	0	2	FAM107A
LUM	0	3.44593	0.993	0.259	0	3	LUM	0	3.44593	0.993	0.259	0	3	LUM	Fibroblast cells
SFRP2	0	3.26668	0.917	0.155	0	3	SFRP2	0	3.26668	0.917	0.155	0	3	SFRP2
COL1A1	0	3.20299	0.93	0.28	0	3	COL1A1	0	3.20299	0.93	0.28	0	3	COL1A1
DCN	0	3.10152	0.993	0.243	0	3	DCN	0	3.10152	0.993	0.243	0	3	DCN
APOD	0	3.099	0.855	0.201	0	3	APOD	0	3.099	0.855	0.201	0	3	APOD
COL1A2	0	3.06412	0.983	0.285	0	3	COL1A2	0	3.06412	0.983	0.285	0	3	COL1A2
COL3A1	0	2.9185	0.956	0.297	0	3	COL3A1	0	2.9185	0.956	0.297	0	3	COL3A1
CTHRC1	0	2.28793	0.823	0.113	0	3	CTHRC1	0	2.28793	0.823	0.113	0	3	CTHRC1
PTGDS	0	2.19441	0.621	0.11	0	3	PTGDS	0	2.19441	0.621	0.11	0	3	PTGDS
FBLN1	0	2.1921	0.906	0.109	0	3	FBLN1	0	2.1921	0.906	0.109	0	3	FBLN1
FN1	0	2.18899	0.87	0.253	0	3	FN1	0	2.18899	0.87	0.253	0	3	FN1
SFRP4	0	2.18188	0.665	0.056	0	3	SFRP4	0	2.18188	0.665	0.056	0	3	SFRP4
CXCL14	0	2.13648	0.519	0.06	0	3	CXCL14	0	2.13648	0.519	0.06	0	3	CXCL14
CCDC80	0	2.07778	0.9	0.108	0	3	CCDC80	0	2.07778	0.9	0.108	0	3	CCDC80
MGP	0	2.0669	0.951	0.617	0	3	MGP	0	2.0669	0.951	0.617	0	3	MGP
COL6A3	0	2.05365	0.941	0.121	0	3	COL6A3	0	2.05365	0.941	0.121	0	3	COL6A3
MMP11	0	1.9896	0.551	0.095	0	3	MMP11	0	1.9896	0.551	0.095	0	3	MMP11
SERPINF1	0	1.93392	0.928	0.198	0	3	SERPINF1	0	1.93392	0.928	0.198	0	3	SERPINF1
C7	0	1.92199	0.546	0.105	0	3	C7	0	1.92199	0.546	0.105	0	3	C7
CYR61	0	1.87632	0.811	0.319	0	3	CYR61	0	1.87632	0.811	0.319	0	3	CYR61
C1S	0	1.80203	0.967	0.226	0	3	C1S	0	1.80203	0.967	0.226	0	3	C1S
IGFBP5	0	1.78955	0.765	0.172	0	3	IGFBP5	0	1.78955	0.765	0.172	0	3	IGFBP5
AEBP1	0	1.74609	0.904	0.152	0	3	AEBP1	0	1.74609	0.904	0.152	0	3	AEBP1
RARRES2	0	1.73937	0.955	0.289	0	3	RARRES2	0	1.73937	0.955	0.289	0	3	RARRES2
C1R	0	1.72336	0.951	0.24	0	3	C1R	0	1.72336	0.951	0.24	0	3	C1R
CTGF1	0	1.7196	0.86	0.382	0	3	CTGF	0	1.7196	0.86	0.382	0	3	CTGF
SPARC1	0	1.69299	0.973	0.524	0	3	SPARC	0	1.69299	0.973	0.524	0	3	SPARC
BGN	0	1.66967	0.941	0.202	0	3	BGN	0	1.66967	0.941	0.202	0	3	BGN
MMP2	0	1.66109	0.896	0.154	0	3	MMP2	0	1.66109	0.896	0.154	0	3	MMP2
POSTN	0	1.63446	0.59	0.082	0	3	POSTN	0	1.63446	0.59	0.082	0	3	POSTN
COL10A1	0	1.61439	0.623	0.031	0	3	COL10A1	0	1.61439	0.623	0.031	0	3	COL10A1
COL6A2	0	1.60142	0.963	0.232	0	3	COL6A2	0	1.60142	0.963	0.232	0	3	COL6A2
VCAN	0	1.56566	0.814	0.117	0	3	VCAN	0	1.56566	0.814	0.117	0	3	VCAN
IGFBP3	0	1.5336	0.623	0.148	0	3	IGFBP3	0	1.5336	0.623	0.148	0	3	IGFBP3
CTSK	0	1.50978	0.824	0.069	0	3	CTSK	0	1.50978	0.824	0.069	0	3	CTSK
LGALS1	0	1.50364	0.998	0.725	0	3	LGALS1	0	1.50364	0.998	0.725	0	3	LGALS1
COL5A2	0	1.5016	0.779	0.111	0	3	COL5A2	0	1.5016	0.779	0.111	0	3	COL5A2
ASPN	0	1.49641	0.761	0.099	0	3	ASPN	0	1.49641	0.761	0.099	0	3	ASPN
THBS2	0	1.47059	0.731	0.054	0	3	THBS2	0	1.47059	0.731	0.054	0	3	THBS2
MFAP4	0	1.35478	0.738	0.069	0	3	MFAP4	0	1.35478	0.738	0.069	0	3	MFAP4
PCOLCE	0	1.34228	0.885	0.154	0	3	PCOLCE	0	1.34228	0.885	0.154	0	3	PCOLCE
C3	0	1.32957	0.715	0.273	0	3	C3	0	1.32957	0.715	0.273	0	3	C3
COL6A1	0	1.31818	0.891	0.23	0	3	COL6A1	0	1.31818	0.891	0.23	0	3	COL6A1
NBL1	0	1.28143	0.861	0.284	0	3	NBL1	0	1.28143	0.861	0.284	0	3	NBL1
INHBA	0	1.25183	0.62	0.038	0	3	INHBA	0	1.25183	0.62	0.038	0	3	INHBA
CALD1	0	1.23448	0.99	0.505	0	3	CALD1	0	1.23448	0.99	0.505	0	3	CALD1
THY1	0	1.22593	0.819	0.127	0	3	THY1	0	1.22593	0.819	0.127	0	3	THY1
NNMT	0	1.21225	0.927	0.355	0	3	NNMT	0	1.21225	0.927	0.355	0	3	NNMT
COL5A1	0	1.20825	0.697	0.077	0	3	COL5A1	0	1.20825	0.697	0.077	0	3	COL5A1
ISLR	0	1.20733	0.738	0.055	0	3	ISLR	0	1.20733	0.738	0.055	0	3	ISLR
HTRA1	0	1.1689	0.812	0.19	0	3	HTRA1	0	1.1689	0.812	0.19	0	3	HTRA1
TAGLN	0	1.14666	0.902	0.329	0	3	TAGLN	0	1.14666	0.902	0.329	0	3	TAGLN
FSTL1	0	1.12452	0.848	0.209	0	3	FSTL1	0	1.12452	0.848	0.209	0	3	FSTL1
TIMP31	0	1.12027	0.871	0.372	0	3	TIMP3	0	1.12027	0.871	0.372	0	3	TIMP3
COL12A1	0	1.10359	0.576	0.068	0	3	COL12A1	0	1.10359	0.576	0.068	0	3	COL12A1
COL8A1	0	1.10253	0.609	0.023	0	3	COL8A1	0	1.10253	0.609	0.023	0	3	COL8A1
SPON2	0	1.0943	0.743	0.101	0	3	SPON2	0	1.0943	0.743	0.101	0	3	SPON2
MXRA8	0	1.06737	0.775	0.073	0	3	MXRA8	0	1.06737	0.775	0.073	0	3	MXRA8
EFEMP1	0	1.0671	0.625	0.079	0	3	EFEMP1	0	1.0671	0.625	0.079	0	3	EFEMP1
SERPINE1	0	1.04247	0.534	0.143	0	3	SERPINE1	0	1.04247	0.534	0.143	0	3	SERPINE1
PALLD	0	1.03227	0.775	0.178	0	3	PALLD	0	1.03227	0.775	0.178	0	3	PALLD
PRELP	0	1.02725	0.616	0.056	0	3	PRELP	0	1.02725	0.616	0.056	0	3	PRELP
THBS1	0	1.02177	0.672	0.166	0	3	THBS1	0	1.02177	0.672	0.166	0	3	THBS1
ACTA2	0	1.01394	0.816	0.311	0	3	ACTA2	0	1.01394	0.816	0.311	0	3	ACTA2
APOC1	0	2.83801	0.764	0.278	0	4	APOC1	0	2.83801	0.764	0.278	0	4	APOC1	Myeloid cells
TYROBP	0	2.64862	0.992	0.19	0	4	TYROBP	0	2.64862	0.992	0.19	0	4	TYROBP
FCER1G	0	2.46699	0.976	0.172	0	4	FCER1G	0	2.46699	0.976	0.172	0	4	FCER1G
APOE	0	2.39663	0.792	0.429	0	4	APOE	0	2.39663	0.792	0.429	0	4	APOE
HLA-DRA	0	2.28901	0.995	0.701	0	4	HLA-DRA	0	2.28901	0.995	0.701	0	4	HLA-DRA
C1QB	0	2.16376	0.618	0.101	0	4	C1QB	0	2.16376	0.618	0.101	0	4	C1QB
HLA-DPA1	0	2.1432	0.972	0.481	0	4	HLA-DPA1	0	2.1432	0.972	0.481	0	4	HLA-DPA1
C1QA	0	2.14032	0.662	0.111	0	4	C1QA	0	2.14032	0.662	0.111	0	4	C1QA
AIF1	0	2.10759	0.952	0.094	0	4	AIF1	0	2.10759	0.952	0.094	0	4	AIF1
HLA-DPB1	0	2.09448	0.964	0.518	0	4	HLA-DPB1	0	2.09448	0.964	0.518	0	4	HLA-DPB1
C1QC	0	2.03253	0.595	0.049	0	4	C1QC	0	2.03253	0.595	0.049	0	4	C1QC
S100A8	0	2.00948	0.524	0.123	0	4	S100A8	0	2.00948	0.524	0.123	0	4	S100A8
RGS1	0	1.91723	0.813	0.231	0	4	RGS1	0	1.91723	0.813	0.231	0	4	RGS1
HLA-DRB11	0	1.91657	0.982	0.597	0	4	HLA-DRB1	0	1.91657	0.982	0.597	0	4	HLA-DRB1
S100A9	0	1.89533	0.642	0.175	0	4	S100A9	0	1.89533	0.642	0.175	0	4	S100A9
HLA-DQA1	0	1.81765	0.851	0.196	0	4	HLA-DQA1	0	1.81765	0.851	0.196	0	4	HLA-DQA1
HLA-DQB1	0	1.74176	0.907	0.31	0	4	HLA-DQB1	0	1.74176	0.907	0.31	0	4	HLA-DQB1
SRGN1	0	1.66618	0.981	0.449	0	4	SRGN	0	1.66618	0.981	0.449	0	4	SRGN
MS4A6A	0	1.63876	0.787	0.054	0	4	MS4A6A	0	1.63876	0.787	0.054	0	4	MS4A6A
LYZ1	0	1.58221	0.937	0.441	0	4	LYZ	0	1.58221	0.937	0.441	0	4	LYZ
ALOX5AP	0	1.5665	0.767	0.141	0	4	ALOX5AP	0	1.5665	0.767	0.141	0	4	ALOX5AP
CD14	0	1.52949	0.72	0.099	0	4	CD14	0	1.52949	0.72	0.099	0	4	CD14
NPC2	0	1.50287	0.988	0.747	0	4	NPC2	0	1.50287	0.988	0.747	0	4	NPC2
CTSS	0	1.49652	0.927	0.327	0	4	CTSS	0	1.49652	0.927	0.327	0	4	CTSS
CD68	0	1.4944	0.829	0.139	0	4	CD68	0	1.4944	0.829	0.139	0	4	CD68
CTSB	0	1.49335	0.923	0.57	0	4	CTSB	0	1.49335	0.923	0.57	0	4	CTSB
CTSD	0	1.48959	0.843	0.632	0	4	CTSD	0	1.48959	0.843	0.632	0	4	CTSD
LST1	0	1.45349	0.878	0.082	0	4	LST1	0	1.45349	0.878	0.082	0	4	LST1
LAPTM5	0	1.41702	0.962	0.241	0	4	LAPTM5	0	1.41702	0.962	0.241	0	4	LAPTM5
C1orf162	0	1.34863	0.849	0.08	0	4	C1orf162	0	1.34863	0.849	0.08	0	4	C1orf162
ITGB2	0	1.32708	0.878	0.13	0	4	ITGB2	0	1.32708	0.878	0.13	0	4	ITGB2
TYMP	0	1.31582	0.913	0.421	0	4	TYMP	0	1.31582	0.913	0.421	0	4	TYMP
GPNMB1	0	1.23761	0.56	0.185	0	4	GPNMB	0	1.23761	0.56	0.185	0	4	GPNMB
CAPG1	0	1.20776	0.866	0.313	0	4	CAPG	0	1.20776	0.866	0.313	0	4	CAPG
MNDA	0	1.1931	0.725	0.027	0	4	MNDA	0	1.1931	0.725	0.027	0	4	MNDA
COTL1	0	1.18141	0.886	0.297	0	4	COTL1	0	1.18141	0.886	0.297	0	4	COTL1
HLA-DMA	0	1.16311	0.878	0.335	0	4	HLA-DMA	0	1.16311	0.878	0.335	0	4	HLA-DMA
TREM2	0	1.13569	0.556	0.028	0	4	TREM2	0	1.13569	0.556	0.028	0	4	TREM2
FCGR3A	0	1.12368	0.605	0.038	0	4	FCGR3A	0	1.12368	0.605	0.038	0	4	FCGR3A
GRN	0	1.10805	0.924	0.534	0	4	GRN	0	1.10805	0.924	0.534	0	4	GRN
SPI1	0	1.1057	0.808	0.047	0	4	SPI1	0	1.1057	0.808	0.047	0	4	SPI1
GPR183	0	1.09748	0.648	0.094	0	4	GPR183	0	1.09748	0.648	0.094	0	4	GPR183
RGS2	0	1.08964	0.617	0.169	0	4	RGS2	0	1.08964	0.617	0.169	0	4	RGS2
S100A4	0	1.07873	0.964	0.603	0	4	S100A4	0	1.07873	0.964	0.603	0	4	S100A4
HCST	0	1.07607	0.8	0.161	0	4	HCST	0	1.07607	0.8	0.161	0	4	HCST
RNASE6	0	1.06701	0.696	0.069	0	4	RNASE6	0	1.06701	0.696	0.069	0	4	RNASE6
MS4A7	0	1.06117	0.708	0.032	0	4	MS4A7	0	1.06117	0.708	0.032	0	4	MS4A7
RGS10	0	1.03143	0.798	0.159	0	4	RGS10	0	1.03143	0.798	0.159	0	4	RGS10
HLA-DMB	0	1.0184	0.743	0.156	0	4	HLA-DMB	0	1.0184	0.743	0.156	0	4	HLA-DMB
RGS5	0	2.99929	0.874	0.17	0	5	RGS5	0	2.99929	0.874	0.17	0	5	RGS5	Stellate cells
ADIRF	0	2.31796	0.971	0.443	0	5	ADIRF	0	2.31796	0.971	0.443	0	5	ADIRF
ACTA21	0	2.29083	0.942	0.311	0	5	ACTA2	0	2.29083	0.942	0.311	0	5	ACTA2
TAGLN1	0	2.24826	0.959	0.338	0	5	TAGLN	0	2.24826	0.959	0.338	0	5	TAGLN
MYL91	0	2.13546	0.993	0.38	0	5	MYL9	0	2.13546	0.993	0.38	0	5	MYL9
NDUFA4L2	0	2.09946	0.862	0.127	0	5	NDUFA4L2	0	2.09946	0.862	0.127	0	5	NDUFA4L2
TPM21	0	1.71634	0.971	0.318	0	5	TPM2	0	1.71634	0.971	0.318	0	5	TPM2
CALD11	0	1.68619	0.998	0.517	0	5	CALD1	0	1.68619	0.998	0.517	0	5	CALD1
PDGFRB1	0	1.60151	0.906	0.13	0	5	PDGFRB	0	1.60151	0.906	0.13	0	5	PDGFRB
PPP1R14A	0	1.53575	0.881	0.156	0	5	PPP1R14A	0	1.53575	0.881	0.156	0	5	PPP1R14A
CRIP11	0	1.39057	0.881	0.387	0	5	CRIP1	0	1.39057	0.881	0.387	0	5	CRIP1
NOTCH3	0	1.35901	0.869	0.137	0	5	NOTCH3	0	1.35901	0.869	0.137	0	5	NOTCH3
HIGD1B	0	1.34537	0.634	0.041	0	5	HIGD1B	0	1.34537	0.634	0.041	0	5	HIGD1B
SPARCL11	0	1.33663	0.986	0.462	0	5	SPARCL1	0	1.33663	0.986	0.462	0	5	SPARCL1
CSRP2	0	1.32567	0.792	0.161	0	5	CSRP2	0	1.32567	0.792	0.161	0	5	CSRP2
MAP1B1	0	1.29708	0.87	0.146	0	5	MAP1B	0	1.29708	0.87	0.146	0	5	MAP1B
MYH11	0	1.29009	0.538	0.041	0	5	MYH11	0	1.29009	0.538	0.041	0	5	MYH11
GPX3	0	1.26618	0.801	0.178	0	5	GPX3	0	1.26618	0.801	0.178	0	5	GPX3
MFGE81	0	1.25918	0.877	0.185	0	5	MFGE8	0	1.25918	0.877	0.185	0	5	MFGE8
PHLDA11	0	1.21702	0.806	0.23	0	5	PHLDA1	0	1.21702	0.806	0.23	0	5	PHLDA1
PLAC9	0	1.16962	0.835	0.179	0	5	PLAC9	0	1.16962	0.835	0.179	0	5	PLAC9
LHFP1	0	1.16773	0.843	0.184	0	5	LHFP	0	1.16773	0.843	0.184	0	5	LHFP
COX4I2	0	1.14934	0.665	0.037	0	5	COX4I2	0	1.14934	0.665	0.037	0	5	COX4I2
C11orf961	0	1.14748	0.747	0.179	0	5	C11orf96	0	1.14748	0.747	0.179	0	5	C11orf96
COL4A11	0	1.13615	0.749	0.284	0	5	COL4A1	0	1.13615	0.749	0.284	0	5	COL4A1
SOD31	0	1.1357	0.939	0.357	0	5	SOD3	0	1.1357	0.939	0.357	0	5	SOD3
ID32	0	1.09881	0.807	0.374	0	5	ID3	0	1.09881	0.807	0.374	0	5	ID3
MYLK	0	1.09782	0.748	0.143	0	5	MYLK	0	1.09782	0.748	0.143	0	5	MYLK
FRZB1	0	1.05651	0.732	0.103	0	5	FRZB	0	1.05651	0.732	0.103	0	5	FRZB
IGFBP51	0	1.05327	0.716	0.193	0	5	IGFBP5	0	1.05327	0.716	0.193	0	5	IGFBP5
GJA4	0	1.0419	0.68	0.07	0	5	GJA4	0	1.0419	0.68	0.07	0	5	GJA4
BGN1	0	1.03507	0.912	0.225	0	5	BGN	0	1.03507	0.912	0.225	0	5	BGN
FABP4	0	1.02127	0.57	0.129	0	5	FABP4	0	1.02127	0.57	0.129	0	5	FABP4
COL4A22	0	1.01402	0.761	0.282	0	5	COL4A2	0	1.01402	0.761	0.282	0	5	COL4A2
PTP4A3	0	1.01013	0.689	0.13	0	5	PTP4A3	0	1.01013	0.689	0.13	0	5	PTP4A3
COL18A11	0	1.00894	0.852	0.405	0	5	COL18A1	0	1.00894	0.852	0.405	0	5	COL18A1
CCL5	0	1.71337	0.51	0.181	0	6	CCL5	0	1.71337	0.51	0.181	0	6	CCL5
CD3D	0	1.67157	0.884	0.122	0	6	CD3D	0	1.67157	0.884	0.122	0	6	CD3D	T & NK cells
CD521	0	1.59586	0.96	0.326	0	6	CD52	0	1.59586	0.96	0.326	0	6	CD52
CD2	0	1.49014	0.845	0.065	0	6	CD2	0	1.49014	0.845	0.065	0	6	CD2
KLRB1	0	1.44568	0.529	0.062	0	6	KLRB1	0	1.44568	0.529	0.062	0	6	KLRB1
LTB	0	1.37312	0.758	0.163	0	6	LTB	0	1.37312	0.758	0.163	0	6	LTB
PTPRCAP	0	1.3246	0.915	0.172	0	6	PTPRCAP	0	1.3246	0.915	0.172	0	6	PTPRCAP
CORO1A1	0	1.29236	0.9	0.218	0	6	CORO1A	0	1.29236	0.9	0.218	0	6	CORO1A
IL7R	0	1.27311	0.639	0.074	0	6	IL7R	0	1.27311	0.639	0.074	0	6	IL7R
CD3E	0	1.26542	0.824	0.048	0	6	CD3E	0	1.26542	0.824	0.048	0	6	CD3E
IL321	0	1.26187	0.962	0.65	0	6	IL32	0	1.26187	0.962	0.65	0	6	IL32
CD7	0	1.24151	0.678	0.07	0	6	CD7	0	1.24151	0.678	0.07	0	6	CD7
CXCR41	0	1.20426	0.894	0.333	0	6	CXCR4	0	1.20426	0.894	0.333	0	6	CXCR4
ARHGDIB1	0	1.15435	0.976	0.496	0	6	ARHGDIB	0	1.15435	0.976	0.496	0	6	ARHGDIB
RAC2	0	1.05095	0.787	0.16	0	6	RAC2	0	1.05095	0.787	0.16	0	6	RAC2
PTPRC1	0	1.0096	0.796	0.154	0	6	PTPRC	0	1.0096	0.796	0.154	0	6	PTPRC
MS4A1	0	1.91697	0.953	0.047	0	7	MS4A1	0	1.91697	0.953	0.047	0	7	MS4A1	B & Plasma cells
CD79A	0	1.85348	0.937	0.063	0	7	CD79A	0	1.85348	0.937	0.063	0	7	CD79A
LTB1	0	1.69032	0.937	0.164	0	7	LTB	0	1.69032	0.937	0.164	0	7	LTB
CD372	0	1.5796	0.959	0.193	0	7	CD37	0	1.5796	0.959	0.193	0	7	CD37
CD522	0	1.55524	0.991	0.334	0	7	CD52	0	1.55524	0.991	0.334	0	7	CD52
CD79B	0	1.54027	0.861	0.095	0	7	CD79B	0	1.54027	0.861	0.095	0	7	CD79B
CORO1A2	0	1.48487	0.895	0.228	0	7	CORO1A	0	1.48487	0.895	0.228	0	7	CORO1A
PTPRCAP1	0	1.46373	0.946	0.182	0	7	PTPRCAP	0	1.46373	0.946	0.182	0	7	PTPRCAP
VPREB3	0	1.40074	0.805	0.032	0	7	VPREB3	0	1.40074	0.805	0.032	0	7	VPREB3
LAPTM52	0	1.27408	0.954	0.286	0	7	LAPTM5	0	1.27408	0.954	0.286	0	7	LAPTM5
CXCR42	0	1.25489	0.93	0.34	0	7	CXCR4	0	1.25489	0.93	0.34	0	7	CXCR4
HLA-DRA1	0	1.22619	1	0.719	0	7	HLA-DRA	0	1.22619	1	0.719	0	7	HLA-DRA
LIMD21	0	1.15701	0.773	0.174	0	7	LIMD2	0	1.15701	0.773	0.174	0	7	LIMD2
SMIM14	0	1.09441	0.738	0.355	0	7	SMIM14	0	1.09441	0.738	0.355	0	7	SMIM14
CD532	0	1.06826	0.828	0.193	0	7	CD53	0	1.06826	0.828	0.193	0	7	CD53
HLA-DQA11	0	1.04177	0.901	0.234	0	7	HLA-DQA1	0	1.04177	0.901	0.234	0	7	HLA-DQA1
PRSS1	0	4.78427	0.992	0.442	0	8	PRSS1	0	4.78427	0.992	0.442	0	8	PRSS1	Acinar cells
CTRB2	0	4.43197	0.997	0.466	0	8	CTRB2	0	4.43197	0.997	0.466	0	8	CTRB2
CLPS	0	4.39194	0.943	0.325	0	8	CLPS	0	4.39194	0.943	0.325	0	8	CLPS
CPB1	0	4.38413	0.962	0.289	0	8	CPB1	0	4.38413	0.962	0.289	0	8	CPB1
CTRB1	0	4.37105	0.967	0.343	0	8	CTRB1	0	4.37105	0.967	0.343	0	8	CTRB1
CELA3A	0	4.34227	0.957	0.285	0	8	CELA3A	0	4.34227	0.957	0.285	0	8	CELA3A
CPA1	0	4.22986	0.948	0.28	0	8	CPA1	0	4.22986	0.948	0.28	0	8	CPA1
AMY2A	0	4.09137	0.781	0.188	0	8	AMY2A	0	4.09137	0.781	0.188	0	8	AMY2A
PNLIP	0	4.05434	0.896	0.263	0	8	PNLIP	0	4.05434	0.896	0.263	0	8	PNLIP
CELA3B	0	4.00507	0.922	0.191	0	8	CELA3B	0	4.00507	0.922	0.191	0	8	CELA3B
CTRC	0	3.94386	0.968	0.305	0	8	CTRC	0	3.94386	0.968	0.305	0	8	CTRC
PLA2G1B	0	3.88457	0.97	0.255	0	8	PLA2G1B	0	3.88457	0.97	0.255	0	8	PLA2G1B
CELA2A	0	3.86534	0.821	0.16	0	8	CELA2A	0	3.86534	0.821	0.16	0	8	CELA2A
SYCN	0	3.8283	0.896	0.234	0	8	SYCN	0	3.8283	0.896	0.234	0	8	SYCN
REG1B	0	3.76964	0.627	0.153	0	8	REG1B	0	3.76964	0.627	0.153	0	8	REG1B
REG1A	0	3.76262	1	0.509	0	8	REG1A	0	3.76262	1	0.509	0	8	REG1A
PRSS3	0	3.60747	0.965	0.259	0	8	PRSS3	0	3.60747	0.965	0.259	0	8	PRSS3
CEL	0	3.32438	0.937	0.151	0	8	CEL	0	3.32438	0.937	0.151	0	8	CEL
CPA2	0	3.25626	0.971	0.162	0	8	CPA2	0	3.25626	0.971	0.162	0	8	CPA2
GP2	0	3.1424	0.899	0.208	0	8	GP2	0	3.1424	0.899	0.208	0	8	GP2
AMY2B	0	2.75107	0.685	0.094	0	8	AMY2B	0	2.75107	0.685	0.094	0	8	AMY2B
SPINK11	0	2.72588	1	0.702	0	8	SPINK1	0	2.72588	1	0.702	0	8	SPINK1
KLK1	0	2.44388	0.937	0.117	0	8	KLK1	0	2.44388	0.937	0.117	0	8	KLK1
CELA2B	0	2.36713	0.759	0.052	0	8	CELA2B	0	2.36713	0.759	0.052	0	8	CELA2B
REG3G	0	2.2804	0.503	0.036	0	8	REG3G	0	2.2804	0.503	0.036	0	8	REG3G
PNLIPRP1	0	2.25175	0.939	0.108	0	8	PNLIPRP1	0	2.25175	0.939	0.108	0	8	PNLIPRP1
CTRL	0	1.92072	0.744	0.032	0	8	CTRL	0	1.92072	0.744	0.032	0	8	CTRL
GATM1	0	1.66094	0.988	0.33	0	8	GATM	0	1.66094	0.988	0.33	0	8	GATM
MT1G1	0	1.65244	0.928	0.28	0	8	MT1G	0	1.65244	0.928	0.28	0	8	MT1G
ALB	0	1.32678	0.699	0.042	0	8	ALB	0	1.32678	0.699	0.042	0	8	ALB
CUZD1	0	1.13084	0.697	0.034	0	8	CUZD1	0	1.13084	0.697	0.034	0	8	CUZD1
PDIA2	0	1.07918	0.743	0.039	0	8	PDIA2	0	1.07918	0.743	0.039	0	8	PDIA2
LGALS2	0	1.06166	0.762	0.111	0	8	LGALS2	0	1.06166	0.762	0.111	0	8	LGALS2
TTR	0	3.42158	0.919	0.126	0	9	TTR	0	3.42158	0.919	0.126	0	9	TTR	Endocrine cells
IAPP	0	3.31279	0.696	0.064	0	9	IAPP	0	3.31279	0.696	0.064	0	9	IAPP
PCSK1N	0	3.28429	0.998	0.143	0	9	PCSK1N	0	3.28429	0.998	0.143	0	9	PCSK1N
RBP4	0	2.33564	0.58	0.103	0	9	RBP4	0	2.33564	0.58	0.103	0	9	RBP4
SCG5	0	2.33275	0.986	0.083	0	9	SCG5	0	2.33275	0.986	0.083	0	9	SCG5
CHGA	0	2.16995	0.937	0.018	0	9	CHGA	0	2.16995	0.937	0.018	0	9	CHGA
MEG31	0	1.67739	0.82	0.179	0	9	MEG3	0	1.67739	0.82	0.179	0	9	MEG3
SLC30A8	0	1.67636	0.894	0.013	0	9	SLC30A8	0	1.67636	0.894	0.013	0	9	SLC30A8
ERO1LB	0	1.64556	0.93	0.111	0	9	ERO1LB	0	1.64556	0.93	0.111	0	9	ERO1LB
CHGB	0	1.55113	0.849	0.016	0	9	CHGB	0	1.55113	0.849	0.016	0	9	CHGB
SCGN	0	1.54526	0.947	0.044	0	9	SCGN	0	1.54526	0.947	0.044	0	9	SCGN
CPE2	0	1.51113	0.983	0.324	0	9	CPE	0	1.51113	0.983	0.324	0	9	CPE
NEUROD1	0	1.37	0.885	0.005	0	9	NEUROD1	0	1.37	0.885	0.005	0	9	NEUROD1
SCG3	0	1.36413	0.885	0.006	0	9	SCG3	0	1.36413	0.885	0.006	0	9	SCG3
MIR7-3HG	0	1.31505	0.816	0.011	0	9	MIR7-3HG	0	1.31505	0.816	0.011	0	9	MIR7-3HG
FAM159B	0	1.27646	0.703	0.008	0	9	FAM159B	0	1.27646	0.703	0.008	0	9	FAM159B
GAD2	0	1.21029	0.828	0.009	0	9	GAD2	0	1.21029	0.828	0.009	0	9	GAD2
NKX2-2	0	1.20564	0.832	0.006	0	9	NKX2-2	0	1.20564	0.832	0.006	0	9	NKX2-2
ABCC8	0	1.15983	0.835	0.013	0	9	ABCC8	0	1.15983	0.835	0.013	0	9	ABCC8
PTPRN	0	1.11074	0.834	0.011	0	9	PTPRN	0	1.11074	0.834	0.011	0	9	PTPRN
G6PC2	0	1.06448	0.703	0.009	0	9	G6PC2	0	1.06448	0.703	0.009	0	9	G6PC2
DLK1	2.82736e-293	1.35247	0.528	0.039	5.57329e-289	9	DLK1	0	1.35247	0.528	0.039	0	9	DLK1
IGLL5	0	5.96285	0.985	0.3	0	10	IGLL5	0	5.96285	0.985	0.3	0	10	IGLL5
IGJ	0	5.17293	0.974	0.171	0	10	IGJ	0	5.17293	0.974	0.171	0	10	IGJ
MZB1	0	3.27932	0.996	0.048	0	10	MZB1	0	3.27932	0.996	0.048	0	10	MZB1
XBP11	0	2.54181	0.991	0.405	0	10	XBP1	0	2.54181	0.991	0.405	0	10	XBP1
DERL3	0	2.28336	0.951	0.049	0	10	DERL3	0	2.28336	0.951	0.049	0	10	DERL3
FKBP111	0	2.18114	0.982	0.211	0	10	FKBP11	0	2.18114	0.982	0.211	0	10	FKBP11
HERPUD1	0	1.89229	0.976	0.598	0	10	HERPUD1	1.10421e-298	1.89229	0.976	0.598	2.17662e-294	10	HERPUD1
CD79A1	0	1.63761	0.921	0.091	0	10	CD79A	0	1.63761	0.921	0.091	0	10	CD79A
SEC11C2	0	1.5676	0.936	0.369	0	10	SEC11C	0	1.5676	0.936	0.369	0	10	SEC11C
PIM2	0	1.42275	0.795	0.06	0	10	PIM2	0	1.42275	0.795	0.06	0	10	PIM2
ITM2C1	0	1.40748	0.91	0.324	0	10	ITM2C	0	1.40748	0.91	0.324	0	10	ITM2C
PRDX4	0	1.36703	0.903	0.408	0	10	PRDX4	2.98998e-273	1.36703	0.903	0.408	5.89384e-269	10	PRDX4
SPCS3	0	1.28446	0.923	0.31	0	10	SPCS3	0	1.28446	0.923	0.31	0	10	SPCS3
JSRP1	0	1.27214	0.649	0.016	0	10	JSRP1	0	1.27214	0.649	0.016	0	10	JSRP1
ISG203	0	1.24605	0.923	0.287	0	10	ISG20	0	1.24605	0.923	0.287	0	10	ISG20
FKBP21	0	1.22934	0.982	0.671	0	10	FKBP2	4.38624e-270	1.22934	0.982	0.671	8.64616e-266	10	FKBP2
HSP90B1	0	1.21034	0.991	0.754	0	10	HSP90B1	1.23898e-239	1.21034	0.991	0.754	2.44228e-235	10	HSP90B1
BTG2	0	1.19889	0.872	0.332	0	10	BTG2	1.07749e-252	1.19889	0.872	0.332	2.12394e-248	10	BTG2
SPCS2	0	1.03025	0.98	0.709	0	10	SPCS2	8.36638e-245	1.03025	0.98	0.709	1.64918e-240	10	SPCS2
SSR3	0	1.01702	0.938	0.553	0	10	SSR3	3.80329e-224	1.01702	0.938	0.553	7.49705e-220	10	SSR3
SDF2L1	0	1.01616	0.85	0.293	0	10	SDF2L1	4.72756e-276	1.01616	0.85	0.293	9.31897e-272	10	SDF2L1
TNFRSF17	0	1.0067	0.633	0.009	0	10	TNFRSF17	0	1.0067	0.633	0.009	0	10	TNFRSF17

## Sheet: 1-7
Tbale 1-7. The DEGs for each cluster in SCC
	p_val_mast	avg_logFC_mast	pct.1_mast	pct.2_mast	p_val_adj_mast	cluster_mast	gene_mast	p_val_wilcox	avg_logFC_wilcox	pct.1_wilcox	pct.2_wilcox	p_val_adj_wilcox	cluster_wilcox	gene_wilcox
KRT1	0	2.67913	0.829	0.579	0	0	KRT1	0	2.67913	0.829	0.579	0	0	KRT1	Epithelial cells
DMKN	0	2.1366	0.856	0.583	0	0	DMKN	0	2.1366	0.856	0.583	0	0	DMKN
KRTDAP	0	1.90147	0.631	0.304	0	0	KRTDAP	0	1.90147	0.631	0.304	0	0	KRTDAP
MT1X	0	1.69336	0.943	0.587	0	0	MT1X	0	1.69336	0.943	0.587	0	0	MT1X
DSP	0	1.64916	0.996	0.57	0	0	DSP	0	1.64916	0.996	0.57	0	0	DSP
PERP	0	1.61143	1	0.694	0	0	PERP	0	1.61143	1	0.694	0	0	PERP
LGALS7B	0	1.53287	0.947	0.431	0	0	LGALS7B	0	1.53287	0.947	0.431	0	0	LGALS7B
LGALS7	0	1.47242	0.66	0.166	0	0	LGALS7	0	1.47242	0.66	0.166	0	0	LGALS7
DSC3	0	1.45767	0.976	0.404	0	0	DSC3	0	1.45767	0.976	0.404	0	0	DSC3
MIR205HG	0	1.40508	0.985	0.516	0	0	MIR205HG	0	1.40508	0.985	0.516	0	0	MIR205HG
SFN	0	1.3766	0.999	0.749	0	0	SFN	0	1.3766	0.999	0.749	0	0	SFN
LY6D	0	1.34587	0.921	0.66	0	0	LY6D	0	1.34587	0.921	0.66	0	0	LY6D
CALML3	0	1.31984	0.773	0.266	0	0	CALML3	0	1.31984	0.773	0.266	0	0	CALML3
S100A14	0	1.3179	0.981	0.55	0	0	S100A14	0	1.3179	0.981	0.55	0	0	S100A14
AQP3	0	1.25183	0.956	0.584	0	0	AQP3	0	1.25183	0.956	0.584	0	0	AQP3
PKP1	0	1.2407	0.836	0.258	0	0	PKP1	0	1.2407	0.836	0.258	0	0	PKP1
CXCL14	0	1.20906	0.861	0.491	0	0	CXCL14	0	1.20906	0.861	0.491	0	0	CXCL14
CXADR	0	1.18813	0.899	0.281	0	0	CXADR	0	1.18813	0.899	0.281	0	0	CXADR
LYPD3	0	1.17314	0.823	0.417	0	0	LYPD3	0	1.17314	0.823	0.417	0	0	LYPD3
DSG1	0	1.14758	0.763	0.151	0	0	DSG1	0	1.14758	0.763	0.151	0	0	DSG1
KLF5	0	1.14688	0.874	0.254	0	0	KLF5	0	1.14688	0.874	0.254	0	0	KLF5
FXYD3	0	1.13018	0.994	0.55	0	0	FXYD3	0	1.13018	0.994	0.55	0	0	FXYD3
ID1	0	1.12278	0.772	0.292	0	0	ID1	0	1.12278	0.772	0.292	0	0	ID1
JUP	0	1.11305	0.92	0.338	0	0	JUP	0	1.11305	0.92	0.338	0	0	JUP
HES1	0	1.05263	0.704	0.335	0	0	HES1	0	1.05263	0.704	0.335	0	0	HES1
MYC	0	1.03889	0.79	0.302	0	0	MYC	0	1.03889	0.79	0.302	0	0	MYC
TMEM45A	0	1.01988	0.719	0.276	0	0	TMEM45A	0	1.01988	0.719	0.276	0	0	TMEM45A
TRIM29	0	1.003	0.851	0.246	0	0	TRIM29	0	1.003	0.851	0.246	0	0	TRIM29
S100A16	0	0.992807	0.989	0.54	0	0	S100A16	0	0.992807	0.989	0.54	0	0	S100A16
EGR1	0	0.984404	0.818	0.474	0	0	EGR1	0	0.984404	0.818	0.474	0	0	EGR1
EMP2	0	0.983146	0.86	0.333	0	0	EMP2	0	0.983146	0.86	0.333	0	0	EMP2
DEFB1	0	0.973403	0.541	0.099	0	0	DEFB1	0	0.973403	0.541	0.099	0	0	DEFB1
DAPL1	0	0.943791	0.692	0.136	0	0	DAPL1	0	0.943791	0.692	0.136	0	0	DAPL1
FGFBP1	0	0.942848	0.629	0.174	0	0	FGFBP1	0	0.942848	0.629	0.174	0	0	FGFBP1
KRT6C	0	0.938056	0.547	0.316	0	0	KRT6C	0	0.938056	0.547	0.316	0	0	KRT6C
HOPX	0	0.920856	0.751	0.244	0	0	HOPX	0	0.920856	0.751	0.244	0	0	HOPX
DST	0	0.908592	0.642	0.367	0	0	DST	0	0.908592	0.642	0.367	0	0	DST
CRABP2	0	0.907401	0.54	0.175	0	0	CRABP2	0	0.907401	0.54	0.175	0	0	CRABP2
COL17A1	0	0.901668	0.533	0.181	0	0	COL17A1	0	0.901668	0.533	0.181	0	0	COL17A1
RND3	0	0.891659	0.695	0.239	0	0	RND3	0	0.891659	0.695	0.239	0	0	RND3
SDC1	0	0.891351	0.847	0.271	0	0	SDC1	0	0.891351	0.847	0.271	0	0	SDC1
GJA1	0	0.878318	0.788	0.246	0	0	GJA1	0	0.878318	0.788	0.246	0	0	GJA1
CLCA2	0	0.875917	0.833	0.266	0	0	CLCA2	0	0.875917	0.833	0.266	0	0	CLCA2
SPINK5	0	0.870005	0.503	0.076	0	0	SPINK5	0	0.870005	0.503	0.076	0	0	SPINK5
DEGS1	0	0.835983	0.88	0.595	0	0	DEGS1	0	0.835983	0.88	0.595	0	0	DEGS1
MT1E	0	0.831158	0.759	0.352	0	0	MT1E	0	0.831158	0.759	0.352	0	0	MT1E
KRT17	0	0.83112	0.508	0.2	0	0	KRT17	0	0.83112	0.508	0.2	0	0	KRT17
RHOV	0	0.824905	0.551	0.09	0	0	RHOV	0	0.824905	0.551	0.09	0	0	RHOV
SERPINB5	0	0.821874	0.902	0.334	0	0	SERPINB5	0	0.821874	0.902	0.334	0	0	SERPINB5
PKP3	0	0.81749	0.832	0.241	0	0	PKP3	0	0.81749	0.832	0.241	0	0	PKP3
SLC38A2	0	0.814374	0.902	0.543	0	0	SLC38A2	0	0.814374	0.902	0.543	0	0	SLC38A2
PHGDH	0	0.777719	0.691	0.159	0	0	PHGDH	0	0.777719	0.691	0.159	0	0	PHGDH
C19orf33	0	0.77752	0.675	0.188	0	0	C19orf33	0	0.77752	0.675	0.188	0	0	C19orf33
SIK1	0	0.767523	0.605	0.264	0	0	SIK1	0	0.767523	0.605	0.264	0	0	SIK1
CAPNS2	0	0.747366	0.642	0.118	0	0	CAPNS2	0	0.747366	0.642	0.118	0	0	CAPNS2
AHNAK2	0	0.745714	0.713	0.181	0	0	AHNAK2	0	0.745714	0.713	0.181	0	0	AHNAK2
CD9	0	0.736562	0.995	0.76	0	0	CD9	0	0.736562	0.995	0.76	0	0	CD9
IMPA2	0	0.720279	0.802	0.302	0	0	IMPA2	0	0.720279	0.802	0.302	0	0	IMPA2
LTB4R	0	0.704415	0.657	0.152	0	0	LTB4R	0	0.704415	0.657	0.152	0	0	LTB4R
PLK2	0	0.69415	0.636	0.199	0	0	PLK2	0	0.69415	0.636	0.199	0	0	PLK2
DSG3	0	0.687873	0.689	0.156	0	0	DSG3	0	0.687873	0.689	0.156	0	0	DSG3
TP63	0	0.684808	0.638	0.122	0	0	TP63	0	0.684808	0.638	0.122	0	0	TP63
TUBB2A	0	0.684412	0.679	0.358	0	0	TUBB2A	0	0.684412	0.679	0.358	0	0	TUBB2A
CA12	0	0.672278	0.654	0.139	0	0	CA12	0	0.672278	0.654	0.139	0	0	CA12
RORA	0	0.66647	0.528	0.137	0	0	RORA	0	0.66647	0.528	0.137	0	0	RORA
FGFR3	0	0.652672	0.515	0.068	0	0	FGFR3	0	0.652672	0.515	0.068	0	0	FGFR3
YBX3	0	0.645895	0.979	0.74	0	0	YBX3	0	0.645895	0.979	0.74	0	0	YBX3
C9orf3	0	0.644357	0.7	0.184	0	0	C9orf3	0	0.644357	0.7	0.184	0	0	C9orf3
MPZL2	0	0.637808	0.643	0.156	0	0	MPZL2	0	0.637808	0.643	0.156	0	0	MPZL2
ALDH3A2	0	0.632129	0.655	0.181	0	0	ALDH3A2	0	0.632129	0.655	0.181	0	0	ALDH3A2
ATP1A1	0	0.630941	0.897	0.616	0	0	ATP1A1	0	0.630941	0.897	0.616	0	0	ATP1A1
LAD1	0	0.624706	0.82	0.326	0	0	LAD1	0	0.624706	0.82	0.326	0	0	LAD1
RAB25	0	0.620492	0.6	0.131	0	0	RAB25	0	0.620492	0.6	0.131	0	0	RAB25
DSTN	0	0.617977	0.992	0.783	0	0	DSTN	0	0.617977	0.992	0.783	0	0	DSTN
DAAM1	0	0.617484	0.649	0.204	0	0	DAAM1	0	0.617484	0.649	0.204	0	0	DAAM1
GSTA4	0	0.61483	0.556	0.116	0	0	GSTA4	0	0.61483	0.556	0.116	0	0	GSTA4
ETS2	0	0.606334	0.765	0.422	0	0	ETS2	0	0.606334	0.765	0.422	0	0	ETS2
NUPR1	0	0.599642	0.735	0.29	0	0	NUPR1	0	0.599642	0.735	0.29	0	0	NUPR1
CA2	0	0.59845	0.538	0.308	0	0	CA2	0	0.59845	0.538	0.308	0	0	CA2
SYNE2	0	0.595253	0.666	0.196	0	0	SYNE2	0	0.595253	0.666	0.196	0	0	SYNE2
TUBA4A	0	0.593799	0.809	0.354	0	0	TUBA4A	0	0.593799	0.809	0.354	0	0	TUBA4A
KTN1	0	0.593197	0.958	0.741	0	0	KTN1	0	0.593197	0.958	0.741	0	0	KTN1
IRF6	0	0.592864	0.587	0.12	0	0	IRF6	0	0.592864	0.587	0.12	0	0	IRF6
GATA3	0	0.586294	0.504	0.088	0	0	GATA3	0	0.586294	0.504	0.088	0	0	GATA3
PTPRF	0	0.582205	0.593	0.108	0	0	PTPRF	0	0.582205	0.593	0.108	0	0	PTPRF
GJB2	0	0.581846	0.573	0.297	0	0	GJB2	0	0.581846	0.573	0.297	0	0	GJB2
SLC2A1	0	0.581442	0.758	0.347	0	0	SLC2A1	0	0.581442	0.758	0.347	0	0	SLC2A1
GLTP	0	0.576395	0.615	0.274	0	0	GLTP	0	0.576395	0.615	0.274	0	0	GLTP
NDFIP2	0	0.5626	0.672	0.184	0	0	NDFIP2	0	0.5626	0.672	0.184	0	0	NDFIP2
TFAP2A	0	0.560429	0.654	0.15	0	0	TFAP2A	0	0.560429	0.654	0.15	0	0	TFAP2A
SOX15	0	0.558288	0.581	0.138	0	0	SOX15	0	0.558288	0.581	0.138	0	0	SOX15
PLP2	0	0.554929	0.985	0.771	0	0	PLP2	0	0.554929	0.985	0.771	0	0	PLP2
EFNA1	0	0.549199	0.536	0.11	0	0	EFNA1	0	0.549199	0.536	0.11	0	0	EFNA1
TMEM154	0	0.541468	0.548	0.155	0	0	TMEM154	0	0.541468	0.548	0.155	0	0	TMEM154
MIB2	0	0.537931	0.629	0.189	0	0	MIB2	0	0.537931	0.629	0.189	0	0	MIB2
THBD	0	0.537198	0.54	0.249	0	0	THBD	0	0.537198	0.54	0.249	0	0	THBD
PVRL1	0	0.53643	0.544	0.114	0	0	PVRL1	0	0.53643	0.544	0.114	0	0	PVRL1
EHF	0	0.534256	0.524	0.128	0	0	EHF	0	0.534256	0.524	0.128	0	0	EHF
EGFR	0	0.532217	0.564	0.109	0	0	EGFR	0	0.532217	0.564	0.109	0	0	EGFR
FBXW7	0	0.526094	0.529	0.185	0	0	FBXW7	0	0.526094	0.529	0.185	0	0	FBXW7
NFIC	0	0.514133	0.678	0.297	0	0	NFIC	0	0.514133	0.678	0.297	0	0	NFIC
ARL4D	0	0.513106	0.542	0.146	0	0	ARL4D	0	0.513106	0.542	0.146	0	0	ARL4D
CBR1	0	0.511939	0.84	0.506	0	0	CBR1	0	0.511939	0.84	0.506	0	0	CBR1
HLA-DRA	0	3.01906	1	0.72	0	1	HLA-DRA	0	3.01906	1	0.72	0	1	HLA-DRA	Myeloid cells
HLA-DRB1	0	2.88814	0.999	0.495	0	1	HLA-DRB1	0	2.88814	0.999	0.495	0	1	HLA-DRB1
HLA-DPB1	0	2.84731	0.999	0.483	0	1	HLA-DPB1	0	2.84731	0.999	0.483	0	1	HLA-DPB1
HLA-DPA1	0	2.71902	0.997	0.434	0	1	HLA-DPA1	0	2.71902	0.997	0.434	0	1	HLA-DPA1
HLA-DQA1	0	2.71813	0.985	0.23	0	1	HLA-DQA1	0	2.71813	0.985	0.23	0	1	HLA-DQA1
CD74	0	2.70317	1	0.768	0	1	CD74	0	2.70317	1	0.768	0	1	CD74
HLA-DQB1	0	2.69869	0.995	0.403	0	1	HLA-DQB1	0	2.69869	0.995	0.403	0	1	HLA-DQB1
TYROBP	0	2.69085	0.996	0.204	0	1	TYROBP	0	2.69085	0.996	0.204	0	1	TYROBP
LYZ	0	2.63479	0.833	0.225	0	1	LYZ	0	2.63479	0.833	0.225	0	1	LYZ
HLA-DQB2	0	2.53614	0.562	0.063	0	1	HLA-DQB2	0	2.53614	0.562	0.063	0	1	HLA-DQB2
HLA-DRB5	0	2.53038	0.911	0.267	0	1	HLA-DRB5	0	2.53038	0.911	0.267	0	1	HLA-DRB5
C15orf48	0	2.4698	0.802	0.111	0	1	C15orf48	0	2.4698	0.802	0.111	0	1	C15orf48
FCER1A	0	2.435	0.649	0.067	0	1	FCER1A	0	2.435	0.649	0.067	0	1	FCER1A
AIF1	0	2.4138	0.927	0.107	0	1	AIF1	0	2.4138	0.927	0.107	0	1	AIF1
C1QB	0	2.34406	0.569	0.074	0	1	C1QB	0	2.34406	0.569	0.074	0	1	C1QB
FCER1G	0	2.32485	0.902	0.129	0	1	FCER1G	0	2.32485	0.902	0.129	0	1	FCER1G
LST1	0	2.18537	0.952	0.094	0	1	LST1	0	2.18537	0.952	0.094	0	1	LST1
C1QA	0	2.1593	0.574	0.065	0	1	C1QA	0	2.1593	0.574	0.065	0	1	C1QA
C1QC	0	2.12628	0.587	0.05	0	1	C1QC	0	2.12628	0.587	0.05	0	1	C1QC
S100B	0	2.10908	0.563	0.087	0	1	S100B	0	2.10908	0.563	0.087	0	1	S100B
SRGN	0	2.07782	0.914	0.21	0	1	SRGN	0	2.07782	0.914	0.21	0	1	SRGN
GPR183	0	2.06751	0.875	0.098	0	1	GPR183	0	2.06751	0.875	0.098	0	1	GPR183
RGS1	0	2.00542	0.908	0.185	0	1	RGS1	0	2.00542	0.908	0.185	0	1	RGS1
MNDA	0	1.99342	0.88	0.048	0	1	MNDA	0	1.99342	0.88	0.048	0	1	MNDA
HLA-DMA	0	1.94457	0.963	0.216	0	1	HLA-DMA	0	1.94457	0.963	0.216	0	1	HLA-DMA
RGS2	0	1.9419	0.885	0.213	0	1	RGS2	0	1.9419	0.885	0.213	0	1	RGS2
CD1A	0	1.92712	0.529	0.044	0	1	CD1A	0	1.92712	0.529	0.044	0	1	CD1A
HLA-DQA2	0	1.90773	0.703	0.067	0	1	HLA-DQA2	0	1.90773	0.703	0.067	0	1	HLA-DQA2
S100A4	0	1.90294	0.939	0.492	0	1	S100A4	0	1.90294	0.939	0.492	0	1	S100A4
CTSS	0	1.80117	0.94	0.15	0	1	CTSS	0	1.80117	0.94	0.15	0	1	CTSS
SPI1	0	1.77549	0.933	0.058	0	1	SPI1	0	1.77549	0.933	0.058	0	1	SPI1
MS4A6A	0	1.76296	0.706	0.047	0	1	MS4A6A	0	1.76296	0.706	0.047	0	1	MS4A6A
HLA-DMB	0	1.75891	0.883	0.098	0	1	HLA-DMB	0	1.75891	0.883	0.098	0	1	HLA-DMB
CYBA	0	1.63793	0.989	0.485	0	1	CYBA	0	1.63793	0.989	0.485	0	1	CYBA
COTL1	0	1.6247	0.93	0.218	0	1	COTL1	0	1.6247	0.93	0.218	0	1	COTL1
CTSH	0	1.61742	0.903	0.099	0	1	CTSH	0	1.61742	0.903	0.099	0	1	CTSH
LCP1	0	1.61444	0.931	0.106	0	1	LCP1	0	1.61444	0.931	0.106	0	1	LCP1
CD83	0	1.61233	0.789	0.092	0	1	CD83	0	1.61233	0.789	0.092	0	1	CD83
GSN	0	1.61058	0.96	0.59	0	1	GSN	0	1.61058	0.96	0.59	0	1	GSN
CD14	0	1.58403	0.533	0.086	0	1	CD14	0	1.58403	0.533	0.086	0	1	CD14
VIM	0	1.55471	0.999	0.382	0	1	VIM	0	1.55471	0.999	0.382	0	1	VIM
LAPTM5	0	1.52162	0.908	0.113	0	1	LAPTM5	0	1.52162	0.908	0.113	0	1	LAPTM5
PLAUR	0	1.49981	0.765	0.153	0	1	PLAUR	0	1.49981	0.765	0.153	0	1	PLAUR
CPVL	0	1.42294	0.779	0.065	0	1	CPVL	0	1.42294	0.779	0.065	0	1	CPVL
ITGB2	0	1.40775	0.838	0.077	0	1	ITGB2	0	1.40775	0.838	0.077	0	1	ITGB2
CD1E	0	1.40128	0.557	0.02	0	1	CD1E	0	1.40128	0.557	0.02	0	1	CD1E
PKIB	0	1.35939	0.65	0.044	0	1	PKIB	0	1.35939	0.65	0.044	0	1	PKIB
IFI30	0	1.34236	0.713	0.06	0	1	IFI30	0	1.34236	0.713	0.06	0	1	IFI30
PTPRC	0	1.32701	0.902	0.098	0	1	PTPRC	0	1.32701	0.902	0.098	0	1	PTPRC
FAM26F	0	1.31239	0.666	0.053	0	1	FAM26F	0	1.31239	0.666	0.053	0	1	FAM26F
ARHGDIB	0	1.2973	0.906	0.398	0	1	ARHGDIB	0	1.2973	0.906	0.398	0	1	ARHGDIB
FGL2	0	1.27658	0.753	0.063	0	1	FGL2	0	1.27658	0.753	0.063	0	1	FGL2
CORO1A	0	1.2751	0.839	0.115	0	1	CORO1A	0	1.2751	0.839	0.115	0	1	CORO1A
LITAF	0	1.27098	0.887	0.353	0	1	LITAF	0	1.27098	0.887	0.353	0	1	LITAF
ALOX5AP	0	1.26179	0.609	0.065	0	1	ALOX5AP	0	1.26179	0.609	0.065	0	1	ALOX5AP
RGS10	0	1.24822	0.886	0.213	0	1	RGS10	0	1.24822	0.886	0.213	0	1	RGS10
IGSF6	0	1.24449	0.72	0.021	0	1	IGSF6	0	1.24449	0.72	0.021	0	1	IGSF6
LTB	0	1.22857	0.521	0.076	0	1	LTB	0	1.22857	0.521	0.076	0	1	LTB
LSP1	0	1.22374	0.908	0.392	0	1	LSP1	0	1.22374	0.908	0.392	0	1	LSP1
LGALS1	0	1.21949	0.99	0.472	0	1	LGALS1	0	1.21949	0.99	0.472	0	1	LGALS1
RNASE6	0	1.21641	0.73	0.04	0	1	RNASE6	0	1.21641	0.73	0.04	0	1	RNASE6
CKLF	0	1.19374	0.76	0.266	0	1	CKLF	0	1.19374	0.76	0.266	0	1	CKLF
YWHAH	0	1.18803	0.844	0.591	0	1	YWHAH	0	1.18803	0.844	0.591	0	1	YWHAH
CST7	0	1.1716	0.557	0.073	0	1	CST7	0	1.1716	0.557	0.073	0	1	CST7
CD68	0	1.15889	0.702	0.087	0	1	CD68	0	1.15889	0.702	0.087	0	1	CD68
CSF1R	0	1.12952	0.651	0.023	0	1	CSF1R	0	1.12952	0.651	0.023	0	1	CSF1R
SLC2A3	0	1.10634	0.671	0.091	0	1	SLC2A3	0	1.10634	0.671	0.091	0	1	SLC2A3
CD86	0	1.1048	0.761	0.03	0	1	CD86	0	1.1048	0.761	0.03	0	1	CD86
BCL2A1	0	1.10339	0.536	0.055	0	1	BCL2A1	0	1.10339	0.536	0.055	0	1	BCL2A1
PLEK	0	1.09959	0.679	0.048	0	1	PLEK	0	1.09959	0.679	0.048	0	1	PLEK
CTSZ	0	1.08355	0.768	0.151	0	1	CTSZ	0	1.08355	0.768	0.151	0	1	CTSZ
CD52	0	1.06654	0.6	0.113	0	1	CD52	0	1.06654	0.6	0.113	0	1	CD52
MS4A7	0	1.06133	0.564	0.021	0	1	MS4A7	0	1.06133	0.564	0.021	0	1	MS4A7
HCK	0	1.05973	0.732	0.035	0	1	HCK	0	1.05973	0.732	0.035	0	1	HCK
HCST	0	1.05578	0.736	0.089	0	1	HCST	0	1.05578	0.736	0.089	0	1	HCST
C1orf162	0	1.05508	0.676	0.051	0	1	C1orf162	0	1.05508	0.676	0.051	0	1	C1orf162
TUBA1A	0	1.05056	0.844	0.365	0	1	TUBA1A	0	1.05056	0.844	0.365	0	1	TUBA1A
FCGR2A	0	1.04036	0.594	0.028	0	1	FCGR2A	0	1.04036	0.594	0.028	0	1	FCGR2A
GPSM3	0	1.03609	0.808	0.095	0	1	GPSM3	0	1.03609	0.808	0.095	0	1	GPSM3
FCGRT	0	1.02813	0.806	0.29	0	1	FCGRT	0	1.02813	0.806	0.29	0	1	FCGRT
NDRG2	0	1.02781	0.572	0.21	0	1	NDRG2	0	1.02781	0.572	0.21	0	1	NDRG2
SERPINB9	0	1.0276	0.561	0.07	0	1	SERPINB9	0	1.0276	0.561	0.07	0	1	SERPINB9
TNFSF13B	0	1.01126	0.578	0.049	0	1	TNFSF13B	0	1.01126	0.578	0.049	0	1	TNFSF13B
GMFG	0	1.00597	0.818	0.115	0	1	GMFG	0	1.00597	0.818	0.115	0	1	GMFG
SERPINF1	0	1.00367	0.692	0.134	0	1	SERPINF1	0	1.00367	0.692	0.134	0	1	SERPINF1
FCGR2B	0	1.00011	0.567	0.022	0	1	FCGR2B	0	1.00011	0.567	0.022	0	1	FCGR2B
CXCR4	0	0.999216	0.549	0.104	0	1	CXCR4	0	0.999216	0.549	0.104	0	1	CXCR4
RHOG	0	0.986132	0.847	0.3	0	1	RHOG	0	0.986132	0.847	0.3	0	1	RHOG
INSIG1	0	0.970372	0.576	0.217	0	1	INSIG1	0	0.970372	0.576	0.217	0	1	INSIG1
GLRX	0	0.969791	0.678	0.099	0	1	GLRX	0	0.969791	0.678	0.099	0	1	GLRX
UCP2	0	0.965079	0.745	0.09	0	1	UCP2	0	0.965079	0.745	0.09	0	1	UCP2
AMICA1	0	0.96209	0.59	0.052	0	1	AMICA1	0	0.96209	0.59	0.052	0	1	AMICA1
ANXA5	0	0.961741	0.941	0.56	0	1	ANXA5	0	0.961741	0.941	0.56	0	1	ANXA5
EVI2B	0	0.960114	0.708	0.063	0	1	EVI2B	0	0.960114	0.708	0.063	0	1	EVI2B
DUSP2	0	0.959967	0.741	0.396	0	1	DUSP2	0	0.959967	0.741	0.396	0	1	DUSP2
CSF2RA	0	0.958119	0.641	0.041	0	1	CSF2RA	0	0.958119	0.641	0.041	0	1	CSF2RA
GLIPR1	0	0.957553	0.712	0.09	0	1	GLIPR1	0	0.957553	0.712	0.09	0	1	GLIPR1
SAMSN1	0	0.952789	0.562	0.058	0	1	SAMSN1	0	0.952789	0.562	0.058	0	1	SAMSN1
ARPC1B	0	0.946425	0.976	0.64	0	1	ARPC1B	0	0.946425	0.976	0.64	0	1	ARPC1B
ARPC5	0	0.941838	0.982	0.759	0	1	ARPC5	0	0.941838	0.982	0.759	0	1	ARPC5
CD53	0	0.937439	0.72	0.073	0	1	CD53	0	0.937439	0.72	0.073	0	1	CD53
SERPINA1	0	0.924866	0.527	0.024	0	1	SERPINA1	0	0.924866	0.527	0.024	0	1	SERPINA1
PPT1	0	0.912066	0.816	0.325	0	1	PPT1	0	0.912066	0.816	0.325	0	1	PPT1
AP1S2	0	0.911192	0.702	0.164	0	1	AP1S2	0	0.911192	0.702	0.164	0	1	AP1S2
CYBB	0	0.909544	0.557	0.022	0	1	CYBB	0	0.909544	0.557	0.022	0	1	CYBB
ID2	0	0.908887	0.752	0.495	0	1	ID2	0	0.908887	0.752	0.495	0	1	ID2
LGALS9	0	0.903075	0.712	0.068	0	1	LGALS9	0	0.903075	0.712	0.068	0	1	LGALS9
CMTM6	0	0.896786	0.847	0.385	0	1	CMTM6	0	0.896786	0.847	0.385	0	1	CMTM6
FYB	0	0.890078	0.614	0.054	0	1	FYB	0	0.890078	0.614	0.054	0	1	FYB
ABI3	0	0.888338	0.582	0.047	0	1	ABI3	0	0.888338	0.582	0.047	0	1	ABI3
NR4A2	0	0.887397	0.719	0.329	0	1	NR4A2	0	0.887397	0.719	0.329	0	1	NR4A2
CLEC7A	0	0.882885	0.721	0.145	0	1	CLEC7A	0	0.882885	0.721	0.145	0	1	CLEC7A
PTPN6	0	0.873451	0.653	0.122	0	1	PTPN6	0	0.873451	0.653	0.122	0	1	PTPN6
BASP1	0	0.866926	0.627	0.159	0	1	BASP1	0	0.866926	0.627	0.159	0	1	BASP1
EMP3	0	0.860817	0.867	0.285	0	1	EMP3	0	0.860817	0.867	0.285	0	1	EMP3
FAM49B	0	0.852828	0.842	0.386	0	1	FAM49B	0	0.852828	0.842	0.386	0	1	FAM49B
HCLS1	0	0.847047	0.708	0.072	0	1	HCLS1	0	0.847047	0.708	0.072	0	1	HCLS1
PEA15	0	0.846217	0.704	0.201	0	1	PEA15	0	0.846217	0.704	0.201	0	1	PEA15
GCA	0	0.842099	0.686	0.121	0	1	GCA	0	0.842099	0.686	0.121	0	1	GCA
GNAI2	0	0.835668	0.823	0.329	0	1	GNAI2	0	0.835668	0.823	0.329	0	1	GNAI2
GADD45B	0	0.834369	0.815	0.569	0	1	GADD45B	0	0.834369	0.815	0.569	0	1	GADD45B
VASP	0	0.827872	0.707	0.337	0	1	VASP	0	0.827872	0.707	0.337	0	1	VASP
CAP1	0	0.817414	0.952	0.708	0	1	CAP1	0	0.817414	0.952	0.708	0	1	CAP1
CLEC4A	0	0.816167	0.581	0.023	0	1	CLEC4A	0	0.816167	0.581	0.023	0	1	CLEC4A
CXCL16	0	0.813393	0.69	0.237	0	1	CXCL16	0	0.813393	0.69	0.237	0	1	CXCL16
TGFBI	0	0.810653	0.68	0.25	0	1	TGFBI	0	0.810653	0.68	0.25	0	1	TGFBI
CARD16	0	0.805937	0.679	0.16	0	1	CARD16	0	0.805937	0.679	0.16	0	1	CARD16
GLIPR2	0	0.79691	0.611	0.066	0	1	GLIPR2	0	0.79691	0.611	0.066	0	1	GLIPR2
TIMP1	0	0.790279	0.813	0.436	0	1	TIMP1	0	0.790279	0.813	0.436	0	1	TIMP1
SLC16A3	0	0.788255	0.603	0.075	0	1	SLC16A3	0	0.788255	0.603	0.075	0	1	SLC16A3
ARL6IP5	0	0.781677	0.891	0.532	0	1	ARL6IP5	0	0.781677	0.891	0.532	0	1	ARL6IP5
NAMPT	0	0.780157	0.776	0.428	0	1	NAMPT	0	0.780157	0.776	0.428	0	1	NAMPT
2020-03-01	0	0.772874	0.584	0.032	0	1	2020-03-01	0	0.772874	0.584	0.032	0	1	2020-03-01
CYTIP	0	0.768124	0.626	0.063	0	1	CYTIP	0	0.768124	0.626	0.063	0	1	CYTIP
NFKBID	0	0.766006	0.564	0.098	0	1	NFKBID	0	0.766006	0.564	0.098	0	1	NFKBID
CD37	0	0.764313	0.668	0.077	0	1	CD37	0	0.764313	0.668	0.077	0	1	CD37
NCF2	0	0.762374	0.577	0.036	0	1	NCF2	0	0.762374	0.577	0.036	0	1	NCF2
CTSC	0	0.76146	0.792	0.506	0	1	CTSC	0	0.76146	0.792	0.506	0	1	CTSC
PAK1	0	0.749274	0.606	0.138	0	1	PAK1	0	0.749274	0.606	0.138	0	1	PAK1
REL	0	0.740558	0.728	0.427	0	1	REL	0	0.740558	0.728	0.427	0	1	REL
STK17B	0	0.733044	0.693	0.177	0	1	STK17B	0	0.733044	0.693	0.177	0	1	STK17B
RNF130	0	0.727212	0.605	0.094	0	1	RNF130	0	0.727212	0.605	0.094	0	1	RNF130
ENTPD1	0	0.723661	0.581	0.063	0	1	ENTPD1	0	0.723661	0.581	0.063	0	1	ENTPD1
FXYD5	0	0.717199	0.82	0.383	0	1	FXYD5	0	0.717199	0.82	0.383	0	1	FXYD5
RUNX3	0	0.716374	0.512	0.073	0	1	RUNX3	0	0.716374	0.512	0.073	0	1	RUNX3
LY96	0	0.706045	0.626	0.135	0	1	LY96	0	0.706045	0.626	0.135	0	1	LY96
SH3BGRL	0	0.701663	0.895	0.576	0	1	SH3BGRL	0	0.701663	0.895	0.576	0	1	SH3BGRL
SMCO4	0	0.695	0.599	0.119	0	1	SMCO4	0	0.695	0.599	0.119	0	1	SMCO4
SAMHD1	0	0.694504	0.608	0.14	0	1	SAMHD1	0	0.694504	0.608	0.14	0	1	SAMHD1
EVI2A	0	0.690859	0.579	0.05	0	1	EVI2A	0	0.690859	0.579	0.05	0	1	EVI2A
RAB31	0	0.690362	0.625	0.173	0	1	RAB31	0	0.690362	0.625	0.173	0	1	RAB31
PRR13	0	0.681784	0.835	0.461	0	1	PRR13	0	0.681784	0.835	0.461	0	1	PRR13
IL2RG	0	0.679658	0.621	0.08	0	1	IL2RG	0	0.679658	0.621	0.08	0	1	IL2RG
ARRB2	0	0.678943	0.589	0.097	0	1	ARRB2	0	0.678943	0.589	0.097	0	1	ARRB2
MTHFD2	0	0.672325	0.63	0.238	0	1	MTHFD2	0	0.672325	0.63	0.238	0	1	MTHFD2
PLEKHO1	0	0.669196	0.574	0.079	0	1	PLEKHO1	0	0.669196	0.574	0.079	0	1	PLEKHO1
ACTR2	0	0.66808	0.898	0.603	0	1	ACTR2	0	0.66808	0.898	0.603	0	1	ACTR2
RBPJ	0	0.667968	0.747	0.363	0	1	RBPJ	0	0.667968	0.747	0.363	0	1	RBPJ
ARL4C	0	0.664649	0.582	0.177	0	1	ARL4C	0	0.664649	0.582	0.177	0	1	ARL4C
FAM105A	0	0.663288	0.528	0.049	0	1	FAM105A	0	0.663288	0.528	0.049	0	1	FAM105A
SYNGR2	0	0.662471	0.894	0.688	0	1	SYNGR2	0	0.662471	0.894	0.688	0	1	SYNGR2
CFLAR	0	0.65964	0.692	0.321	0	1	CFLAR	0	0.65964	0.692	0.321	0	1	CFLAR
HAVCR2	0	0.659523	0.518	0.039	0	1	HAVCR2	0	0.659523	0.518	0.039	0	1	HAVCR2
RAP1A	0	0.656056	0.765	0.351	0	1	RAP1A	0	0.656056	0.765	0.351	0	1	RAP1A
NABP1	0	0.652018	0.608	0.216	0	1	NABP1	0	0.652018	0.608	0.216	0	1	NABP1
CD4	0	0.648399	0.574	0.043	0	1	CD4	0	0.648399	0.574	0.043	0	1	CD4
LYN	0	0.641106	0.579	0.061	0	1	LYN	0	0.641106	0.579	0.061	0	1	LYN
NUB1	0	0.641017	0.52	0.281	0	1	NUB1	0	0.641017	0.52	0.281	0	1	NUB1
STK4	0	0.63938	0.62	0.215	0	1	STK4	0	0.63938	0.62	0.215	0	1	STK4
SNX10	0	0.638031	0.571	0.111	0	1	SNX10	0	0.638031	0.571	0.111	0	1	SNX10
RAB32	0	0.63773	0.616	0.138	0	1	RAB32	0	0.63773	0.616	0.138	0	1	RAB32
LY86	0	0.632622	0.502	0.026	0	1	LY86	0	0.632622	0.502	0.026	0	1	LY86
KYNU	0	0.631394	0.513	0.065	0	1	KYNU	0	0.631394	0.513	0.065	0	1	KYNU
SDCBP	0	0.631342	0.848	0.421	0	1	SDCBP	0	0.631342	0.848	0.421	0	1	SDCBP
DAPP1	0	0.625032	0.503	0.12	0	1	DAPP1	0	0.625032	0.503	0.12	0	1	DAPP1
ANXA11	0	0.622086	0.734	0.32	0	1	ANXA11	0	0.622086	0.734	0.32	0	1	ANXA11
FMNL1	0	0.620073	0.596	0.064	0	1	FMNL1	0	0.620073	0.596	0.064	0	1	FMNL1
DPYSL2	0	0.620011	0.616	0.115	0	1	DPYSL2	0	0.620011	0.616	0.115	0	1	DPYSL2
CELF2	0	0.615296	0.606	0.09	0	1	CELF2	0	0.615296	0.606	0.09	0	1	CELF2
ALCAM	0	0.607802	0.51	0.065	0	1	ALCAM	0	0.607802	0.51	0.065	0	1	ALCAM
MOB1A	0	0.598181	0.783	0.453	0	1	MOB1A	0	0.598181	0.783	0.453	0	1	MOB1A
PSMB9	0	0.596216	0.873	0.561	0	1	PSMB9	0	0.596216	0.873	0.561	0	1	PSMB9
TXNIP	0	0.5933	0.751	0.449	0	1	TXNIP	0	0.5933	0.751	0.449	0	1	TXNIP
VOPP1	0	0.58969	0.541	0.108	0	1	VOPP1	0	0.58969	0.541	0.108	0	1	VOPP1
CCDC88A	0	0.588184	0.576	0.097	0	1	CCDC88A	0	0.588184	0.576	0.097	0	1	CCDC88A
WAS	0	0.578698	0.536	0.045	0	1	WAS	0	0.578698	0.536	0.045	0	1	WAS
GRB2	0	0.578347	0.696	0.305	0	1	GRB2	0	0.578347	0.696	0.305	0	1	GRB2
LIMS1	0	0.573217	0.66	0.378	0	1	LIMS1	0	0.573217	0.66	0.378	0	1	LIMS1
RNASET2	0	0.562992	0.631	0.339	0	1	RNASET2	0	0.562992	0.631	0.339	0	1	RNASET2
HSD17B11	0	0.556252	0.534	0.108	0	1	HSD17B11	0	0.556252	0.534	0.108	0	1	HSD17B11
IER5	0	0.552885	0.591	0.3	0	1	IER5	0	0.552885	0.591	0.3	0	1	IER5
FERMT3	0	0.543405	0.518	0.06	0	1	FERMT3	0	0.543405	0.518	0.06	0	1	FERMT3
OGFRL1	0	0.542582	0.586	0.232	0	1	OGFRL1	0	0.542582	0.586	0.232	0	1	OGFRL1
RGS19	0	0.542093	0.501	0.113	0	1	RGS19	0	0.542093	0.501	0.113	0	1	RGS19
IFITM2	0	0.533375	0.617	0.25	0	1	IFITM2	0	0.533375	0.617	0.25	0	1	IFITM2
PLSCR1	0	0.526743	0.693	0.353	0	1	PLSCR1	0	0.526743	0.693	0.353	0	1	PLSCR1
SH3KBP1	0	0.523969	0.539	0.087	0	1	SH3KBP1	0	0.523969	0.539	0.087	0	1	SH3KBP1
ARPC4	0	0.517701	0.793	0.538	0	1	ARPC4	0	0.517701	0.793	0.538	0	1	ARPC4
IL13RA1	0	0.516495	0.626	0.261	0	1	IL13RA1	0	0.516495	0.626	0.261	0	1	IL13RA1
DAZAP2	0	0.509523	0.821	0.55	0	1	DAZAP2	0	0.509523	0.821	0.55	0	1	DAZAP2
RAP1B	0	0.509322	0.816	0.57	0	1	RAP1B	0	0.509322	0.816	0.57	0	1	RAP1B
2020-09-06	0	0.506486	0.54	0.112	0	1	2020-09-06	0	0.506486	0.54	0.112	0	1	2020-09-06
GABARAPL2	0	0.502772	0.769	0.56	0	1	GABARAPL2	0	0.502772	0.769	0.56	0	1	GABARAPL2
EFHD2	0	0.502146	0.631	0.31	0	1	EFHD2	0	0.502146	0.631	0.31	0	1	EFHD2
CXCL10	0	2.77022	0.603	0.13	0	2	CXCL10	0	2.77022	0.603	0.13	0	2	CXCL10	Epithelial cells
ISG15	0	2.39849	0.989	0.393	0	2	ISG15	0	2.39849	0.989	0.393	0	2	ISG15
IFIT3	0	2.0878	0.833	0.17	0	2	IFIT3	0	2.0878	0.833	0.17	0	2	IFIT3
IGFBP3	0	1.89454	0.842	0.158	0	2	IGFBP3	0	1.89454	0.842	0.158	0	2	IGFBP3
IFI6	0	1.77684	0.995	0.472	0	2	IFI6	0	1.77684	0.995	0.472	0	2	IFI6
GBP1	0	1.53629	0.871	0.342	0	2	GBP1	0	1.53629	0.871	0.342	0	2	GBP1
ISG20	0	1.50266	0.797	0.212	0	2	ISG20	0	1.50266	0.797	0.212	0	2	ISG20
CAV1	0	1.50105	0.887	0.39	0	2	CAV1	0	1.50105	0.887	0.39	0	2	CAV1
IFIT1	0	1.4085	0.821	0.114	0	2	IFIT1	0	1.4085	0.821	0.114	0	2	IFIT1
WARS	0	1.3994	0.634	0.266	0	2	WARS	0	1.3994	0.634	0.266	0	2	WARS
MX1	0	1.35781	0.933	0.296	0	2	MX1	0	1.35781	0.933	0.296	0	2	MX1
KRT6C1	0	1.31521	0.928	0.415	0	2	KRT6C	0	1.31521	0.928	0.415	0	2	KRT6C
IGFBP6	0	1.25772	0.605	0.086	0	2	IGFBP6	0	1.25772	0.605	0.086	0	2	IGFBP6
ANXA3	0	1.17546	0.783	0.133	0	2	ANXA3	0	1.17546	0.783	0.133	0	2	ANXA3
LY6E	0	1.16841	0.986	0.712	0	2	LY6E	0	1.16841	0.986	0.712	0	2	LY6E
LAP31	0	1.15525	0.902	0.52	0	2	LAP3	0	1.15525	0.902	0.52	0	2	LAP3
ADM	0	1.13601	0.817	0.147	0	2	ADM	0	1.13601	0.817	0.147	0	2	ADM
PDLIM11	0	1.11374	0.957	0.488	0	2	PDLIM1	0	1.11374	0.957	0.488	0	2	PDLIM1
DNASE1L3	0	1.08393	0.676	0.112	0	2	DNASE1L3	0	1.08393	0.676	0.112	0	2	DNASE1L3
SERPINB51	0	1.08235	0.995	0.619	0	2	SERPINB5	0	1.08235	0.995	0.619	0	2	SERPINB5
HERC6	0	1.07531	0.827	0.12	0	2	HERC6	0	1.07531	0.827	0.12	0	2	HERC6
ITGA6	0	1.06443	0.876	0.311	0	2	ITGA6	0	1.06443	0.876	0.311	0	2	ITGA6
SYT8	0	1.03992	0.784	0.151	0	2	SYT8	0	1.03992	0.784	0.151	0	2	SYT8
TAP1	0	1.03914	0.942	0.563	0	2	TAP1	0	1.03914	0.942	0.563	0	2	TAP1
RSAD2	0	1.03786	0.608	0.043	0	2	RSAD2	0	1.03786	0.608	0.043	0	2	RSAD2
KLK5	0	1.03766	0.691	0.068	0	2	KLK5	0	1.03766	0.691	0.068	0	2	KLK5
UBE2L6	0	1.03466	0.918	0.449	0	2	UBE2L6	0	1.03466	0.918	0.449	0	2	UBE2L6
IFI35	0	0.993768	0.838	0.295	0	2	IFI35	0	0.993768	0.838	0.295	0	2	IFI35
C1R	0	0.975036	0.86	0.291	0	2	C1R	0	0.975036	0.86	0.291	0	2	C1R
CBR3	0	0.963462	0.811	0.328	0	2	CBR3	0	0.963462	0.811	0.328	0	2	CBR3
OAS1	0	0.944186	0.846	0.205	0	2	OAS1	0	0.944186	0.846	0.205	0	2	OAS1
SLC39A6	0	0.933884	0.926	0.416	0	2	SLC39A6	0	0.933884	0.926	0.416	0	2	SLC39A6
DDX58	0	0.912372	0.691	0.138	0	2	DDX58	0	0.912372	0.691	0.138	0	2	DDX58
COL17A11	0	0.899607	0.841	0.346	0	2	COL17A1	0	0.899607	0.841	0.346	0	2	COL17A1
LAMB3	0	0.892021	0.731	0.186	0	2	LAMB3	0	0.892021	0.731	0.186	0	2	LAMB3
BPGM	0	0.882209	0.691	0.135	0	2	BPGM	0	0.882209	0.691	0.135	0	2	BPGM
PDZK1IP1	0	0.879695	0.847	0.291	0	2	PDZK1IP1	0	0.879695	0.847	0.291	0	2	PDZK1IP1
GJB6	0	0.875178	0.835	0.263	0	2	GJB6	0	0.875178	0.835	0.263	0	2	GJB6
ASS1	0	0.869346	0.727	0.167	0	2	ASS1	0	0.869346	0.727	0.167	0	2	ASS1
OASL	0	0.869259	0.607	0.062	0	2	OASL	0	0.869259	0.607	0.062	0	2	OASL
PLSCR11	0	0.854591	0.884	0.429	0	2	PLSCR1	0	0.854591	0.884	0.429	0	2	PLSCR1
OAS3	0	0.84346	0.773	0.158	0	2	OAS3	0	0.84346	0.773	0.158	0	2	OAS3
SAMD9	0	0.836161	0.718	0.168	0	2	SAMD9	0	0.836161	0.718	0.168	0	2	SAMD9
LIMA11	0	0.833071	0.948	0.533	0	2	LIMA1	0	0.833071	0.948	0.533	0	2	LIMA1
CXCL141	0	0.827533	0.987	0.673	0	2	CXCL14	0	0.827533	0.987	0.673	0	2	CXCL14
TUBA4A1	0	0.826595	0.942	0.579	0	2	TUBA4A	0	0.826595	0.942	0.579	0	2	TUBA4A
PCDH7	0	0.821095	0.804	0.197	0	2	PCDH7	0	0.821095	0.804	0.197	0	2	PCDH7
SQRDL	0	0.802325	0.888	0.417	0	2	SQRDL	0	0.802325	0.888	0.417	0	2	SQRDL
INPP1	0	0.7933	0.689	0.244	0	2	INPP1	0	0.7933	0.689	0.244	0	2	INPP1
DST1	0	0.792415	0.835	0.498	0	2	DST	0	0.792415	0.835	0.498	0	2	DST
OCIAD21	0	0.791926	0.887	0.447	0	2	OCIAD2	0	0.791926	0.887	0.447	0	2	OCIAD2
HIST1H1C	0	0.791795	0.643	0.235	0	2	HIST1H1C	0	0.791795	0.643	0.235	0	2	HIST1H1C
TMEM54	0	0.78975	0.85	0.325	0	2	TMEM54	0	0.78975	0.85	0.325	0	2	TMEM54
CCDC109B	0	0.789376	0.867	0.377	0	2	CCDC109B	0	0.789376	0.867	0.377	0	2	CCDC109B
TNFRSF12A	0	0.789321	0.889	0.337	0	2	TNFRSF12A	0	0.789321	0.889	0.337	0	2	TNFRSF12A
GJB21	0	0.782107	0.94	0.42	0	2	GJB2	0	0.782107	0.94	0.42	0	2	GJB2
DYNLT1	0	0.77752	0.935	0.619	0	2	DYNLT1	0	0.77752	0.935	0.619	0	2	DYNLT1
CAV21	0	0.774839	0.875	0.398	0	2	CAV2	0	0.774839	0.875	0.398	0	2	CAV2
MSRB1	0	0.771468	0.735	0.259	0	2	MSRB1	0	0.771468	0.735	0.259	0	2	MSRB1
HIST1H2BK	0	0.761572	0.661	0.247	0	2	HIST1H2BK	0	0.761572	0.661	0.247	0	2	HIST1H2BK
H1F0	0	0.748825	0.788	0.357	0	2	H1F0	0	0.748825	0.788	0.357	0	2	H1F0
FAM213A1	0	0.747404	0.928	0.544	0	2	FAM213A	0	0.747404	0.928	0.544	0	2	FAM213A
HSPH1	0	0.737428	0.898	0.437	0	2	HSPH1	0	0.737428	0.898	0.437	0	2	HSPH1
SP100	0	0.737313	0.863	0.407	0	2	SP100	0	0.737313	0.863	0.407	0	2	SP100
DSC21	0	0.73695	0.818	0.372	0	2	DSC2	0	0.73695	0.818	0.372	0	2	DSC2
CARHSP1	0	0.73372	0.856	0.412	0	2	CARHSP1	0	0.73372	0.856	0.412	0	2	CARHSP1
SLC2A11	0	0.733095	0.861	0.551	0	2	SLC2A1	0	0.733095	0.861	0.551	0	2	SLC2A1
PHLDA2	0	0.713048	0.886	0.507	0	2	PHLDA2	0	0.713048	0.886	0.507	0	2	PHLDA2
CBR11	0	0.711143	0.94	0.671	0	2	CBR1	0	0.711143	0.94	0.671	0	2	CBR1
GBP2	0	0.706776	0.756	0.384	0	2	GBP2	0	0.706776	0.756	0.384	0	2	GBP2
SERPING1	0	0.702806	0.631	0.215	0	2	SERPING1	0	0.702806	0.631	0.215	0	2	SERPING1
PARP14	0	0.702125	0.8	0.32	0	2	PARP14	0	0.702125	0.8	0.32	0	2	PARP14
SECTM1	0	0.700677	0.544	0.096	0	2	SECTM1	0	0.700677	0.544	0.096	0	2	SECTM1
LYPD31	0	0.697818	0.952	0.618	0	2	LYPD3	0	0.697818	0.952	0.618	0	2	LYPD3
CMPK2	0	0.669781	0.591	0.072	0	2	CMPK2	0	0.669781	0.591	0.072	0	2	CMPK2
IRF7	0	0.666649	0.768	0.285	0	2	IRF7	0	0.666649	0.768	0.285	0	2	IRF7
IFIH1	0	0.657981	0.641	0.158	0	2	IFIH1	0	0.657981	0.641	0.158	0	2	IFIH1
LY6K	0	0.647649	0.69	0.142	0	2	LY6K	0	0.647649	0.69	0.142	0	2	LY6K
HAPLN3	0	0.644826	0.501	0.168	0	2	HAPLN3	0	0.644826	0.501	0.168	0	2	HAPLN3
SP110	0	0.639878	0.755	0.283	0	2	SP110	0	0.639878	0.755	0.283	0	2	SP110
SDCBP2	0	0.63558	0.598	0.159	0	2	SDCBP2	0	0.63558	0.598	0.159	0	2	SDCBP2
MYO1B	0	0.630234	0.687	0.181	0	2	MYO1B	0	0.630234	0.687	0.181	0	2	MYO1B
MGST3	0	0.626979	0.946	0.745	0	2	MGST3	0	0.626979	0.946	0.745	0	2	MGST3
GLO1	0	0.623804	0.854	0.478	0	2	GLO1	0	0.623804	0.854	0.478	0	2	GLO1
RNF114	0	0.617328	0.696	0.36	0	2	RNF114	0	0.617328	0.696	0.36	0	2	RNF114
FXYD31	0	0.612638	1	0.777	0	2	FXYD3	0	0.612638	1	0.777	0	2	FXYD3
EIF2AK2	0	0.610675	0.737	0.275	0	2	EIF2AK2	0	0.610675	0.737	0.275	0	2	EIF2AK2
PSMB8	0	0.606638	0.948	0.729	0	2	PSMB8	0	0.606638	0.948	0.729	0	2	PSMB8
CKB	0	0.605792	0.749	0.299	0	2	CKB	0	0.605792	0.749	0.299	0	2	CKB
CDCP1	0	0.601296	0.729	0.27	0	2	CDCP1	0	0.601296	0.729	0.27	0	2	CDCP1
TAP2.1	0	0.600147	0.754	0.342	0	2	TAP2.1	0	0.600147	0.754	0.342	0	2	TAP2.1
FHL2	0	0.59716	0.728	0.327	0	2	FHL2	0	0.59716	0.728	0.327	0	2	FHL2
MX2	0	0.578966	0.539	0.123	0	2	MX2	0	0.578966	0.539	0.123	0	2	MX2
TUBA1C	0	0.577151	0.969	0.765	0	2	TUBA1C	0	0.577151	0.969	0.765	0	2	TUBA1C
TMEM40	0	0.573413	0.586	0.181	0	2	TMEM40	0	0.573413	0.586	0.181	0	2	TMEM40
PSMB51	0	0.572951	0.946	0.706	0	2	PSMB5	0	0.572951	0.946	0.706	0	2	PSMB5
TUBB6	0	0.568956	0.853	0.493	0	2	TUBB6	0	0.568956	0.853	0.493	0	2	TUBB6
USP18	0	0.564838	0.524	0.069	0	2	USP18	0	0.564838	0.524	0.069	0	2	USP18
PARP9	0	0.560784	0.768	0.31	0	2	PARP9	0	0.560784	0.768	0.31	0	2	PARP9
NT5C3A	0	0.557926	0.657	0.267	0	2	NT5C3A	0	0.557926	0.657	0.267	0	2	NT5C3A
STAT1	0	0.557023	0.907	0.475	0	2	STAT1	0	0.557023	0.907	0.475	0	2	STAT1
CYB5R11	0	0.552097	0.819	0.417	0	2	CYB5R1	0	0.552097	0.819	0.417	0	2	CYB5R1
ARPC5L	0	0.543189	0.921	0.607	0	2	ARPC5L	0	0.543189	0.921	0.607	0	2	ARPC5L
CASP7	0	0.542727	0.639	0.196	0	2	CASP7	0	0.542727	0.639	0.196	0	2	CASP7
RHOD	0	0.537528	0.736	0.289	0	2	RHOD	0	0.537528	0.736	0.289	0	2	RHOD
MAPK6	0	0.536326	0.785	0.353	0	2	MAPK6	0	0.536326	0.785	0.353	0	2	MAPK6
NSFL1C	0	0.535056	0.846	0.448	0	2	NSFL1C	0	0.535056	0.846	0.448	0	2	NSFL1C
S100A161	0	0.533835	0.998	0.769	0	2	S100A16	0	0.533835	0.998	0.769	0	2	S100A16
DUSP14	0	0.531349	0.709	0.276	0	2	DUSP14	0	0.531349	0.709	0.276	0	2	DUSP14
ETS21	0	0.528925	0.934	0.589	0	2	ETS2	0	0.528925	0.934	0.589	0	2	ETS2
TMBIM11	0	0.526434	0.838	0.474	0	2	TMBIM1	0	0.526434	0.838	0.474	0	2	TMBIM1
IFI44L	0	0.521055	0.56	0.158	0	2	IFI44L	0	0.521055	0.56	0.158	0	2	IFI44L
SLC16A1	0	0.513458	0.644	0.214	0	2	SLC16A1	0	0.513458	0.644	0.214	0	2	SLC16A1
SERPINH1	0	0.510757	0.615	0.217	0	2	SERPINH1	0	0.510757	0.615	0.217	0	2	SERPINH1
LAD11	0	0.505718	0.937	0.572	0	2	LAD1	0	0.505718	0.937	0.572	0	2	LAD1
PDIA6	0	0.505403	0.935	0.725	0	2	PDIA6	0	0.505403	0.935	0.725	0	2	PDIA6
BGN	0	0.50368	0.601	0.145	0	2	BGN	0	0.50368	0.601	0.145	0	2	BGN
LY6D1	6.4181983e-317	0.504618	0.992	0.79	1.194875979265e-312	2	LY6D	4.21096e-253	0.504618	0.992	0.79	7.83955e-249	2	LY6D
PSMB91	8.62777e-306	0.504404	0.915	0.637	1.60623e-301	2	PSMB9	4.97995e-300	0.504404	0.915	0.637	9.27117e-296	2	PSMB9
SERPINB2	2.12259e-292	0.669422	0.53	0.183	3.95162e-288	2	SERPINB2	0	0.669422	0.53	0.183	0	2	SERPINB2
ITGB1	1.60935e-291	0.562777	0.797	0.535	2.99613e-287	2	ITGB1	1.15317e-264	0.562777	0.797	0.535	2.14686e-260	2	ITGB1
KRT6B	2.46355e-289	0.826882	0.873	0.531	4.58639e-285	2	KRT6B	0	0.826882	0.873	0.531	0	2	KRT6B
SOD2	1.60118e-264	0.67498	0.833	0.57	2.98091e-260	2	SOD2	3.32697e-265	0.67498	0.833	0.57	6.19383e-261	2	SOD2
IRF1	3.40746e-249	0.521068	0.736	0.421	6.34366e-245	2	IRF1	6.27132e-257	0.521068	0.736	0.421	1.16753e-252	2	IRF1
NDUFA4L2	4.80595e-244	0.854452	0.564	0.247	8.94724e-240	2	NDUFA4L2	5.11985e-272	0.854452	0.564	0.247	9.53163e-268	2	NDUFA4L2
IL32	0	2.62718	0.927	0.132	0	3	IL32	0	2.62718	0.927	0.132	0	3	IL32	T & NK cells
CD3D	0	2.24328	0.876	0.022	0	3	CD3D	0	2.24328	0.876	0.022	0	3	CD3D
CD7	0	1.99957	0.734	0.025	0	3	CD7	0	1.99957	0.734	0.025	0	3	CD7
CD2	0	1.91412	0.889	0.041	0	3	CD2	0	1.91412	0.889	0.041	0	3	CD2
PTPRCAP	0	1.72163	0.892	0.037	0	3	PTPRCAP	0	1.72163	0.892	0.037	0	3	PTPRCAP
TNFRSF18	0	1.55994	0.676	0.246	0	3	TNFRSF18	0	1.55994	0.676	0.246	0	3	TNFRSF18
CD521	0	1.49213	0.917	0.229	0	3	CD52	0	1.49213	0.917	0.229	0	3	CD52
CD3E	0	1.46283	0.838	0.014	0	3	CD3E	0	1.46283	0.838	0.014	0	3	CD3E
RAC2	0	1.37691	0.821	0.153	0	3	RAC2	0	1.37691	0.821	0.153	0	3	RAC2
CD69	0	1.34191	0.702	0.159	0	3	CD69	0	1.34191	0.702	0.159	0	3	CD69
CORO1A1	0	1.34059	0.922	0.301	0	3	CORO1A	0	1.34059	0.922	0.301	0	3	CORO1A
CXCR41	0	1.32514	0.74	0.214	0	3	CXCR4	0	1.32514	0.74	0.214	0	3	CXCR4
BATF	0	1.30479	0.584	0.047	0	3	BATF	0	1.30479	0.584	0.047	0	3	BATF
DUSP4	0	1.28326	0.676	0.11	0	3	DUSP4	0	1.28326	0.676	0.11	0	3	DUSP4
CD27	0	1.16226	0.511	0.009	0	3	CD27	0	1.16226	0.511	0.009	0	3	CD27
LCK	0	1.15294	0.732	0.01	0	3	LCK	0	1.15294	0.732	0.01	0	3	LCK
SPOCK2	0	1.13824	0.612	0.008	0	3	SPOCK2	0	1.13824	0.612	0.008	0	3	SPOCK2
PTPRC1	0	1.13091	0.94	0.306	0	3	PTPRC	0	1.13091	0.94	0.306	0	3	PTPRC
CD3G	0	1.10505	0.656	0.004	0	3	CD3G	0	1.10505	0.656	0.004	0	3	CD3G
TIGIT	0	1.10301	0.57	0.006	0	3	TIGIT	0	1.10301	0.57	0.006	0	3	TIGIT
RGS11	0	1.09588	0.934	0.373	0	3	RGS1	0	1.09588	0.934	0.373	0	3	RGS1
S100A41	0	1.08388	0.994	0.607	0	3	S100A4	0	1.08388	0.994	0.607	0	3	S100A4
IL2RG1	0	1.04866	0.789	0.216	0	3	IL2RG	0	1.04866	0.789	0.216	0	3	IL2RG
ARHGDIB1	0	1.00814	0.988	0.528	0	3	ARHGDIB	0	1.00814	0.988	0.528	0	3	ARHGDIB
LAT	0	1.00803	0.604	0.022	0	3	LAT	0	1.00803	0.604	0.022	0	3	LAT
FXYD51	0	0.985139	0.915	0.494	0	3	FXYD5	0	0.985139	0.915	0.494	0	3	FXYD5
LINC00152	0	0.970759	0.653	0.201	0	3	LINC00152	0	0.970759	0.653	0.201	0	3	LINC00152
SRGN1	0	0.952267	0.996	0.391	0	3	SRGN	0	0.952267	0.996	0.391	0	3	SRGN
STK17B1	0	0.943979	0.772	0.309	0	3	STK17B	0	0.943979	0.772	0.309	0	3	STK17B
ITM2A	0	0.942199	0.577	0.123	0	3	ITM2A	0	0.942199	0.577	0.123	0	3	ITM2A
HCST1	0	0.941972	0.788	0.256	0	3	HCST	0	0.941972	0.788	0.256	0	3	HCST
SAMSN11	0	0.936369	0.72	0.184	0	3	SAMSN1	0	0.936369	0.72	0.184	0	3	SAMSN1
SH2D2A	0	0.935199	0.52	0.025	0	3	SH2D2A	0	0.935199	0.52	0.025	0	3	SH2D2A
EVL	0	0.930362	0.712	0.236	0	3	EVL	0	0.930362	0.712	0.236	0	3	EVL
GMFG1	0	0.927221	0.827	0.299	0	3	GMFG	0	0.927221	0.827	0.299	0	3	GMFG
TSC22D3	0	0.902953	0.658	0.304	0	3	TSC22D3	0	0.902953	0.658	0.304	0	3	TSC22D3
SLA	0	0.884802	0.588	0.123	0	3	SLA	0	0.884802	0.588	0.123	0	3	SLA
CD247	0	0.884136	0.577	0.005	0	3	CD247	0	0.884136	0.577	0.005	0	3	CD247
APOBEC3G	0	0.881598	0.564	0.08	0	3	APOBEC3G	0	0.881598	0.564	0.08	0	3	APOBEC3G
PTPN7	0	0.878166	0.614	0.064	0	3	PTPN7	0	0.878166	0.614	0.064	0	3	PTPN7
LIMD2	0	0.848327	0.661	0.188	0	3	LIMD2	0	0.848327	0.661	0.188	0	3	LIMD2
DDIT4	0	0.844097	0.737	0.368	0	3	DDIT4	0	0.844097	0.737	0.368	0	3	DDIT4
IFITM21	0	0.834844	0.769	0.341	0	3	IFITM2	0	0.834844	0.769	0.341	0	3	IFITM2
TNFRSF1B	0	0.832428	0.535	0.14	0	3	TNFRSF1B	0	0.832428	0.535	0.14	0	3	TNFRSF1B
RP11-347P5.1	0	0.831765	0.616	0.163	0	3	RP11-347P5.1	0	0.831765	0.616	0.163	0	3	RP11-347P5.1
ACAP1	0	0.831615	0.644	0.134	0	3	ACAP1	0	0.831615	0.644	0.134	0	3	ACAP1
LDHB	0	0.807399	0.776	0.439	0	3	LDHB	3.76092e-304	0.807399	0.776	0.439	7.00171e-300	3	LDHB
BIRC3	0	0.789182	0.685	0.187	0	3	BIRC3	0	0.789182	0.685	0.187	0	3	BIRC3
RHOH	0	0.783108	0.555	0.05	0	3	RHOH	0	0.783108	0.555	0.05	0	3	RHOH
FYN	0	0.712482	0.52	0.068	0	3	FYN	0	0.712482	0.52	0.068	0	3	FYN
ANXA6	0	0.711282	0.61	0.163	0	3	ANXA6	0	0.711282	0.61	0.163	0	3	ANXA6
CD371	0	0.708981	0.719	0.23	0	3	CD37	0	0.708981	0.719	0.23	0	3	CD37
2020-09-01	0	0.694461	0.548	0.118	0	3	2020-09-01	0	0.694461	0.548	0.118	0	3	2020-09-01
ICAM3	0	0.682025	0.611	0.161	0	3	ICAM3	0	0.682025	0.611	0.161	0	3	ICAM3
ETS1	0	0.668664	0.515	0.085	0	3	ETS1	0	0.668664	0.515	0.085	0	3	ETS1
TMEM661	0	0.659232	0.962	0.736	0	3	TMEM66	4.83332e-301	0.659232	0.962	0.736	8.99819e-297	3	TMEM66
LAPTM51	0	0.624989	0.834	0.324	0	3	LAPTM5	0	0.624989	0.834	0.324	0	3	LAPTM5
STK17A1	0	0.620341	0.573	0.288	0	3	STK17A	1.08754e-219	0.620341	0.573	0.288	2.02467e-215	3	STK17A
COTL11	0	0.613923	0.913	0.404	0	3	COTL1	0	0.613923	0.913	0.404	0	3	COTL1
LEPROTL1	0	0.613849	0.634	0.357	0	3	LEPROTL1	2.67988e-235	0.613849	0.634	0.357	4.98913e-231	3	LEPROTL1
CYTIP1	8.57088e-302	0.655021	0.619	0.211	1.59564e-297	3	CYTIP	0	0.655021	0.619	0.211	0	3	CYTIP
CST71	3.62152e-299	0.644737	0.633	0.197	6.74218e-295	3	CST7	0	0.644737	0.633	0.197	0	3	CST7
ID21	1.97511e-286	0.782264	0.893	0.557	3.67707e-282	3	ID2	3.83236e-279	0.782264	0.893	0.557	7.1347e-275	3	ID2
RNF2131	7.8222e-285	0.514247	0.552	0.35	1.45626e-280	3	RNF213	1.12664e-127	0.514247	0.552	0.35	2.09746e-123	3	RNF213
CD531	2.29394e-279	0.609487	0.667	0.243	4.27063e-275	3	CD53	0	0.609487	0.667	0.243	0	3	CD53
C9orf16	2.69959e-275	0.517645	0.878	0.649	5.02582e-271	3	C9orf16	5.59484e-195	0.517645	0.878	0.649	1.04159e-190	3	C9orf16
CREM	1.86465e-272	0.79666	0.579	0.276	3.47142e-268	3	CREM	9.0005e-232	0.79666	0.579	0.276	1.67562e-227	3	CREM
ARL6IP51	1.43399e-254	0.525352	0.931	0.624	2.66967e-250	3	ARL6IP5	7.67555e-241	0.525352	0.931	0.624	1.42896e-236	3	ARL6IP5
CD48	5.30812e-248	0.528387	0.533	0.161	9.88213e-244	3	CD48	0	0.528387	0.533	0.161	0	3	CD48
EMP31	3.19568e-236	0.5233	0.835	0.438	5.9494e-232	3	EMP3	2.40725e-244	0.5233	0.835	0.438	4.48158e-240	3	EMP3
CD99	4.80225e-236	0.507501	0.931	0.705	8.94035e-232	3	CD99	1.00618e-204	0.507501	0.931	0.705	1.8732e-200	3	CD99
FYB1	3.94249e-234	0.522121	0.583	0.201	7.33973e-230	3	FYB	2.49153e-304	0.522121	0.583	0.201	4.63849e-300	3	FYB
ALOX5AP1	7.69029e-225	0.683188	0.583	0.208	1.4317e-220	3	ALOX5AP	9.47373e-288	0.683188	0.583	0.208	1.76372e-283	3	ALOX5AP
1961-09-01	6.94579e-222	0.501653	0.519	0.224	1.2931e-217	3	2020-09-06	5.40177e-211	0.501653	0.519	0.224	1.00565e-206	3	2020-09-06
DUSP21	3.84124e-214	0.71565	0.838	0.483	7.15123e-210	3	DUSP2	1.25176e-209	0.71565	0.838	0.483	2.33041e-205	3	DUSP2
LTB1	1.0592e-197	0.780178	0.519	0.192	1.97191e-193	3	LTB	3.10066e-256	0.780178	0.519	0.192	5.77249e-252	3	LTB
UCP21	6.5487e-186	0.63226	0.595	0.267	1.21917e-181	3	UCP2	1.48571e-210	0.63226	0.595	0.267	2.76595e-206	3	UCP2
ISG201	3.36411e-179	0.539127	0.551	0.228	6.26296e-175	3	ISG20	2.64944e-231	0.539127	0.551	0.228	4.93247e-227	3	ISG20
TNFAIP3	6.27694e-174	0.56616	0.554	0.28	1.16858e-169	3	TNFAIP3	4.53528e-172	0.56616	0.554	0.28	8.44333e-168	3	TNFAIP3
CRIP1	1.91112e-156	0.51976	0.535	0.279	3.55793e-152	3	CRIP1	6.87065e-152	0.51976	0.535	0.279	1.27911e-147	3	CRIP1
PI3	0	3.03	0.863	0.04	0	4	PI3	0	3.03	0.863	0.04	0	4	PI3
S100A7	0	2.24709	0.997	0.619	0	4	S100A7	0	2.24709	0.997	0.619	0	4	S100A7
CDKN2A	0	2.15354	0.99	0.14	0	4	CDKN2A	0	2.15354	0.99	0.14	0	4	CDKN2A
DDIT41	0	1.92192	0.934	0.364	0	4	DDIT4	0	1.92192	0.934	0.364	0	4	DDIT4
NDUFA4L21	0	1.87804	0.863	0.243	0	4	NDUFA4L2	0	1.87804	0.863	0.243	0	4	NDUFA4L2
ADIRF	0	1.77719	0.942	0.296	0	4	ADIRF	0	1.77719	0.942	0.296	0	4	ADIRF
HIST1H1C1	0	1.69013	0.862	0.235	0	4	HIST1H1C	0	1.69013	0.862	0.235	0	4	HIST1H1C
MAGEA4	0	1.64583	0.924	0.004	0	4	MAGEA4	0	1.64583	0.924	0.004	0	4	MAGEA4
FAM213A2	0	1.58079	0.958	0.55	0	4	FAM213A	0	1.58079	0.958	0.55	0	4	FAM213A
NDRG12	0	1.55044	0.889	0.483	0	4	NDRG1	0	1.55044	0.889	0.483	0	4	NDRG1
MGST1	0	1.47026	0.971	0.226	0	4	MGST1	0	1.47026	0.971	0.226	0	4	MGST1
GJB22	0	1.41939	0.941	0.429	0	4	GJB2	0	1.41939	0.941	0.429	0	4	GJB2
CLIC3	0	1.36222	0.655	0.058	0	4	CLIC3	0	1.36222	0.655	0.058	0	4	CLIC3
PTTG1	0	1.31957	0.798	0.33	0	4	PTTG1	0	1.31957	0.798	0.33	0	4	PTTG1
C10orf99	0	1.30789	0.618	0.103	0	4	C10orf99	0	1.30789	0.618	0.103	0	4	C10orf99
PDZK1IP11	0	1.22628	0.919	0.298	0	4	PDZK1IP1	0	1.22628	0.919	0.298	0	4	PDZK1IP1
ELF3	0	1.21714	0.638	0.029	0	4	ELF3	0	1.21714	0.638	0.029	0	4	ELF3
CLDN4	0	1.21097	0.65	0.095	0	4	CLDN4	0	1.21097	0.65	0.095	0	4	CLDN4
S100A12	0	1.20089	0.528	0.053	0	4	S100A12	0	1.20089	0.528	0.053	0	4	S100A12
CASP14	0	1.19597	0.676	0.232	0	4	CASP14	0	1.19597	0.676	0.232	0	4	CASP14
CXCL1	0	1.14237	0.541	0.057	0	4	CXCL1	0	1.14237	0.541	0.057	0	4	CXCL1
GGCT	0	1.11603	0.948	0.49	0	4	GGCT	0	1.11603	0.948	0.49	0	4	GGCT
RP11-295G20.2	0	1.10905	0.881	0.299	0	4	RP11-295G20.2	0	1.10905	0.881	0.299	0	4	RP11-295G20.2
NQO1	0	1.10075	0.843	0.127	0	4	NQO1	0	1.10075	0.843	0.127	0	4	NQO1
CSRP2	0	1.05307	0.856	0.241	0	4	CSRP2	0	1.05307	0.856	0.241	0	4	CSRP2
PPIF	0	1.05306	0.858	0.325	0	4	PPIF	0	1.05306	0.858	0.325	0	4	PPIF
HIST1H2BK1	0	1.04576	0.807	0.25	0	4	HIST1H2BK	0	1.04576	0.807	0.25	0	4	HIST1H2BK
AKR1B10	0	1.03543	0.755	0.223	0	4	AKR1B10	0	1.03543	0.755	0.223	0	4	AKR1B10
CCT51	0	1.02327	0.957	0.635	0	4	CCT5	0	1.02327	0.957	0.635	0	4	CCT5
BST21	0	1.02187	0.904	0.355	0	4	BST2	0	1.02187	0.904	0.355	0	4	BST2
TPM2	0	1.00997	0.658	0.107	0	4	TPM2	0	1.00997	0.658	0.107	0	4	TPM2
GPNMB1	0	0.992844	0.917	0.614	0	4	GPNMB	2.93547e-285	0.992844	0.917	0.614	5.46496e-281	4	GPNMB
FSCN1	0	0.990127	0.978	0.559	0	4	FSCN1	0	0.990127	0.978	0.559	0	4	FSCN1
UPP1	0	0.982595	0.599	0.19	0	4	UPP1	0	0.982595	0.599	0.19	0	4	UPP1
CSTA1	0	0.981611	0.933	0.579	0	4	CSTA	0	0.981611	0.933	0.579	0	4	CSTA
CHCHD10	0	0.955311	0.884	0.448	0	4	CHCHD10	0	0.955311	0.884	0.448	0	4	CHCHD10
PSMG3	0	0.949205	0.905	0.364	0	4	PSMG3	0	0.949205	0.905	0.364	0	4	PSMG3
H2AFJ	0	0.90507	0.932	0.526	0	4	H2AFJ	0	0.90507	0.932	0.526	0	4	H2AFJ
PLAU	0	0.878895	0.703	0.238	0	4	PLAU	0	0.878895	0.703	0.238	0	4	PLAU
TCEB1	0	0.877952	0.978	0.694	0	4	TCEB1	0	0.877952	0.978	0.694	0	4	TCEB1
HILPDA	0	0.873371	0.548	0.115	0	4	HILPDA	0	0.873371	0.548	0.115	0	4	HILPDA
PTGES	0	0.859387	0.675	0.173	0	4	PTGES	0	0.859387	0.675	0.173	0	4	PTGES
SERPINB4	0	0.849113	0.767	0.217	0	4	SERPINB4	0	0.849113	0.767	0.217	0	4	SERPINB4
TKT	0	0.840037	0.934	0.683	0	4	TKT	0	0.840037	0.934	0.683	0	4	TKT
AK11	0	0.839707	0.843	0.26	0	4	AK1	0	0.839707	0.843	0.26	0	4	AK1
TMEM141	0	0.835609	0.9	0.418	0	4	TMEM141	0	0.835609	0.9	0.418	0	4	TMEM141
UBE2S	0	0.828301	0.537	0.266	0	4	UBE2S	4.23756e-157	0.828301	0.537	0.266	7.88906e-153	4	UBE2S
PCBD1	0	0.825894	0.873	0.34	0	4	PCBD1	0	0.825894	0.873	0.34	0	4	PCBD1
ARPC5L1	0	0.820714	0.952	0.612	0	4	ARPC5L	0	0.820714	0.952	0.612	0	4	ARPC5L
CRABP21	0	0.813398	0.846	0.355	0	4	CRABP2	0	0.813398	0.846	0.355	0	4	CRABP2
ANAPC16	0	0.799267	0.957	0.608	0	4	ANAPC16	0	0.799267	0.957	0.608	0	4	ANAPC16
KRT18	0	0.797671	0.567	0.071	0	4	KRT18	0	0.797671	0.567	0.071	0	4	KRT18
CARHSP11	0	0.785334	0.866	0.42	0	4	CARHSP1	0	0.785334	0.866	0.42	0	4	CARHSP1
C7orf50	0	0.784859	0.837	0.358	0	4	C7orf50	0	0.784859	0.837	0.358	0	4	C7orf50
GCSH	0	0.772523	0.799	0.297	0	4	GCSH	0	0.772523	0.799	0.297	0	4	GCSH
H2AFV	0	0.767759	0.917	0.562	0	4	H2AFV	0	0.767759	0.917	0.562	0	4	H2AFV
PGF	0	0.764611	0.511	0.128	0	4	PGF	0	0.764611	0.511	0.128	0	4	PGF
IFI271	0	0.755672	0.997	0.727	0	4	IFI27	0	0.755672	0.997	0.727	0	4	IFI27
TRAPPC2L	0	0.749264	0.89	0.464	0	4	TRAPPC2L	0	0.749264	0.89	0.464	0	4	TRAPPC2L
COMTD11	0	0.747827	0.852	0.355	0	4	COMTD1	0	0.747827	0.852	0.355	0	4	COMTD1
PSMB21	0	0.747003	0.945	0.673	0	4	PSMB2	0	0.747003	0.945	0.673	0	4	PSMB2
FKBP41	0	0.743137	0.853	0.369	0	4	FKBP4	0	0.743137	0.853	0.369	0	4	FKBP4
C9orf142	0	0.742059	0.883	0.431	0	4	C9orf142	0	0.742059	0.883	0.431	0	4	C9orf142
TMEM254	0	0.735037	0.715	0.15	0	4	TMEM254	0	0.735037	0.715	0.15	0	4	TMEM254
SQLE	0	0.731177	0.789	0.291	0	4	SQLE	0	0.731177	0.789	0.291	0	4	SQLE
LY6K1	0	0.727468	0.694	0.152	0	4	LY6K	0	0.727468	0.694	0.152	0	4	LY6K
C16orf74	0	0.726577	0.63	0.105	0	4	C16orf74	0	0.726577	0.63	0.105	0	4	C16orf74
LY6E2	0	0.719874	0.96	0.717	0	4	LY6E	0	0.719874	0.96	0.717	0	4	LY6E
HMGB3	0	0.71037	0.732	0.272	0	4	HMGB3	0	0.71037	0.732	0.272	0	4	HMGB3
MRPL52	0	0.704532	0.932	0.668	0	4	MRPL52	0	0.704532	0.932	0.668	0	4	MRPL52
NDUFB6	0	0.701722	0.919	0.575	0	4	NDUFB6	0	0.701722	0.919	0.575	0	4	NDUFB6
EIF3B	0	0.700201	0.845	0.373	0	4	EIF3B	0	0.700201	0.845	0.373	0	4	EIF3B
SERINC21	0	0.699651	0.69	0.228	0	4	SERINC2	0	0.699651	0.69	0.228	0	4	SERINC2
CDH31	0	0.697833	0.789	0.246	0	4	CDH3	0	0.697833	0.789	0.246	0	4	CDH3
FLNA1	0	0.69213	0.825	0.529	0	4	FLNA	4.58425e-226	0.69213	0.825	0.529	8.5345e-222	4	FLNA
MRPL51	0	0.687686	0.958	0.733	0	4	MRPL51	0	0.687686	0.958	0.733	0	4	MRPL51
RPA3	0	0.685415	0.859	0.402	0	4	RPA3	0	0.685415	0.859	0.402	0	4	RPA3
NDUFA6	0	0.67699	0.966	0.728	0	4	NDUFA6	0	0.67699	0.966	0.728	0	4	NDUFA6
SERPINB3	0	0.674444	0.707	0.183	0	4	SERPINB3	0	0.674444	0.707	0.183	0	4	SERPINB3
RP11-783K16.5	0	0.674042	0.707	0.141	0	4	RP11-783K16.5	0	0.674042	0.707	0.141	0	4	RP11-783K16.5
NDUFC11	0	0.670931	0.956	0.68	0	4	NDUFC1	0	0.670931	0.956	0.68	0	4	NDUFC1
NMB	0	0.665868	0.667	0.119	0	4	NMB	0	0.665868	0.667	0.119	0	4	NMB
RPS4Y1	0	0.665625	0.972	0.619	0	4	RPS4Y1	0	0.665625	0.972	0.619	0	4	RPS4Y1
HSBP1	0	0.66536	0.971	0.735	0	4	HSBP1	0	0.66536	0.971	0.735	0	4	HSBP1
PMVK	0	0.664445	0.885	0.493	0	4	PMVK	0	0.664445	0.885	0.493	0	4	PMVK
HSBP1L11	0	0.66261	0.731	0.252	0	4	HSBP1L1	0	0.66261	0.731	0.252	0	4	HSBP1L1
GGH	0	0.657511	0.699	0.253	0	4	GGH	0	0.657511	0.699	0.253	0	4	GGH
SAR1A	0	0.648724	0.825	0.442	0	4	SAR1A	1.1937e-281	0.648724	0.825	0.442	2.22231e-277	4	SAR1A
FAM162A	0	0.646971	0.926	0.644	0	4	FAM162A	1.32314e-282	0.646971	0.926	0.644	2.46328e-278	4	FAM162A
UBE2V2	0	0.640166	0.894	0.507	0	4	UBE2V2	0	0.640166	0.894	0.507	0	4	UBE2V2
NAA10	0	0.63927	0.827	0.518	0	4	NAA10	2.3293e-256	0.63927	0.827	0.518	4.33645e-252	4	NAA10
TSTD1	0	0.628816	0.894	0.517	0	4	TSTD1	0	0.628816	0.894	0.517	0	4	TSTD1
ANP32B	0	0.628138	0.942	0.711	0	4	ANP32B	0	0.628138	0.942	0.711	0	4	ANP32B
EMD	0	0.623661	0.811	0.328	0	4	EMD	0	0.623661	0.811	0.328	0	4	EMD
STOML2	0	0.620507	0.872	0.539	0	4	STOML2	2.64408e-277	0.620507	0.872	0.539	4.92249e-273	4	STOML2
HSD17B10	0	0.618222	0.917	0.658	0	4	HSD17B10	0	0.618222	0.917	0.658	0	4	HSD17B10
ADK1	0	0.617753	0.867	0.441	0	4	ADK	0	0.617753	0.867	0.441	0	4	ADK
REEP3	0	0.613837	0.753	0.286	0	4	REEP3	0	0.613837	0.753	0.286	0	4	REEP3
AGPAT2	0	0.613796	0.825	0.384	0	4	AGPAT2	0	0.613796	0.825	0.384	0	4	AGPAT2
PFDN2	0	0.612155	0.927	0.713	0	4	PFDN2	2.12058e-260	0.612155	0.927	0.713	3.94789e-256	4	PFDN2
MED10	0	0.612148	0.84	0.412	0	4	MED10	0	0.612148	0.84	0.412	0	4	MED10
TMEM541	0	0.60528	0.804	0.336	0	4	TMEM54	0	0.60528	0.804	0.336	0	4	TMEM54
COX20	0	0.603312	0.817	0.399	0	4	COX20	0	0.603312	0.817	0.399	0	4	COX20
WDR34	0	0.595869	0.691	0.2	0	4	WDR34	0	0.595869	0.691	0.2	0	4	WDR34
C8orf59	0	0.588953	0.869	0.455	0	4	C8orf59	0	0.588953	0.869	0.455	0	4	C8orf59
HK1	0	0.58817	0.781	0.327	0	4	HK1	0	0.58817	0.781	0.327	0	4	HK1
PYGL1	0	0.581437	0.775	0.295	0	4	PYGL	0	0.581437	0.775	0.295	0	4	PYGL
FAM83A	0	0.576064	0.567	0.124	0	4	FAM83A	0	0.576064	0.567	0.124	0	4	FAM83A
POLD21	0	0.573897	0.796	0.405	0	4	POLD2	5.48704e-294	0.573897	0.796	0.405	1.02152e-289	4	POLD2
NOC2L	0	0.573834	0.728	0.336	0	4	NOC2L	5.30351e-292	0.573834	0.728	0.336	9.87354e-288	4	NOC2L
HNRNPH3	0	0.573772	0.83	0.45	0	4	HNRNPH3	9.77709e-292	0.573772	0.83	0.45	1.8202e-287	4	HNRNPH3
CBX31	0	0.569245	0.925	0.656	0	4	CBX3	2.42132e-267	0.569245	0.925	0.656	4.50778e-263	4	CBX3
TOMM5	0	0.563378	0.692	0.281	0	4	TOMM5	0	0.563378	0.692	0.281	0	4	TOMM5
DCTN3	0	0.562726	0.878	0.58	0	4	DCTN3	3.05888e-237	0.562726	0.878	0.58	5.69472e-233	4	DCTN3
SWI5	0	0.559645	0.646	0.172	0	4	SWI5	0	0.559645	0.646	0.172	0	4	SWI5
EIF4H	0	0.554044	0.884	0.583	0	4	EIF4H	1.81765e-268	0.554044	0.884	0.583	3.38392e-264	4	EIF4H
MRPL41	0	0.550747	0.887	0.624	0	4	MRPL41	5.10443e-237	0.550747	0.887	0.624	9.50292e-233	4	MRPL41
ROMO1	0	0.550272	0.95	0.7	0	4	ROMO1	3.57279e-299	0.550272	0.95	0.7	6.65146e-295	4	ROMO1
SRCAP	0	0.543592	0.662	0.229	0	4	SRCAP	0	0.543592	0.662	0.229	0	4	SRCAP
C5orf38	0	0.541684	0.588	0.125	0	4	C5orf38	0	0.541684	0.588	0.125	0	4	C5orf38
CHCHD1	0	0.540858	0.777	0.348	0	4	CHCHD1	0	0.540858	0.777	0.348	0	4	CHCHD1
VBP1	0	0.539909	0.794	0.39	0	4	VBP1	1.28464e-299	0.539909	0.794	0.39	2.39162e-295	4	VBP1
KARS	0	0.537993	0.814	0.469	0	4	KARS	5.09607e-252	0.537993	0.814	0.469	9.48735e-248	4	KARS
ZNF503	0	0.537629	0.63	0.142	0	4	ZNF503	0	0.537629	0.63	0.142	0	4	ZNF503
MRPS16	0	0.536183	0.812	0.398	0	4	MRPS16	0	0.536183	0.812	0.398	0	4	MRPS16
PSMD71	0	0.531159	0.904	0.646	0	4	PSMD7	1.0584e-242	0.531159	0.904	0.646	1.97042e-238	4	PSMD7
NDUFB3	0	0.52673	0.915	0.654	0	4	NDUFB3	4.79497e-262	0.52673	0.915	0.654	8.92679e-258	4	NDUFB3
IRAK1	0	0.523597	0.639	0.2	0	4	IRAK1	0	0.523597	0.639	0.2	0	4	IRAK1
DPM3	0	0.506818	0.722	0.316	0	4	DPM3	3.63291e-295	0.506818	0.722	0.316	6.76338e-291	4	DPM3
MRPS17.1	0	0.506397	0.578	0.147	0	4	MRPS17.1	0	0.506397	0.578	0.147	0	4	MRPS17.1
PHPT1	3.33736e-319	0.526266	0.94	0.718	6.213170617e-315	4	PHPT1	8.54328e-253	0.526266	0.94	0.718	1.5905e-248	4	PHPT1
PFDN6	5.28734e-319	0.513911	0.792	0.402	9.8434452e-315	4	PFDN6	1.16096e-271	0.513911	0.792	0.402	2.16136e-267	4	PFDN6
PSMA5	6.338235e-318	0.534491	0.861	0.573	1.17998916765e-313	4	PSMA5	3.04963e-228	0.534491	0.861	0.573	5.67751e-224	4	PSMA5
S100A162	1.4989013e-317	0.634978	0.997	0.773	2.79050454464e-313	4	S100A16	1.26478e-288	0.634978	0.997	0.773	2.35464e-284	4	S100A16
ZDHHC12	3.24833785e-316	0.545485	0.787	0.403	6.047430572186e-312	4	ZDHHC12	1.01466e-258	0.545485	0.787	0.403	1.889e-254	4	ZDHHC12
LY6D2	5.646961945e-315	0.80535	0.996	0.793	1.0512949052927e-310	4	LY6D	1.20463e-278	0.80535	0.996	0.793	2.24267e-274	4	LY6D
TMEM106C	2.21842597655e-313	0.543591	0.638	0.201	0	4	TMEM106C	0	0.543591	0.638	0.201	0	4	TMEM106C
KDELR2	1.587258879506e-312	0.524965	0.899	0.6	2.955e-308	4	KDELR2	1.05421e-265	0.524965	0.899	0.6	1.96262e-261	4	KDELR2
COX17	0	0.539757	0.887	0.545	2.93508e-305	4	COX17	9.96248e-266	0.539757	0.887	0.545	1.85471e-261	4	COX17
MRPL13	6.42409e-307	0.516256	0.855	0.515	1.19597e-302	4	MRPL13	8.85065e-253	0.516256	0.855	0.515	1.64772e-248	4	MRPL13
ETFB	1.09832e-306	0.545257	0.873	0.584	2.04475e-302	4	ETFB	4.63907e-223	0.545257	0.873	0.584	8.63656e-219	4	ETFB
UQCC2	1.57031e-303	0.533225	0.82	0.441	2.92345e-299	4	UQCC2	8.48638e-260	0.533225	0.82	0.441	1.57991e-255	4	UQCC2
SRM1	1.38431e-299	0.63806	0.802	0.51	2.57717e-295	4	SRM	2.75537e-206	0.63806	0.802	0.51	5.12967e-202	4	SRM
NGFRAP1	1.63101e-299	0.60668	0.789	0.346	3.03645e-295	4	NGFRAP1	0	0.60668	0.789	0.346	0	4	NGFRAP1
SDC4	2.59853e-295	0.691544	0.768	0.344	4.83769e-291	4	SDC4	1.68694e-295	0.691544	0.768	0.344	3.14057e-291	4	SDC4
ANXA71	9.9066e-292	0.511029	0.9	0.637	1.84431e-287	4	ANXA7	5.32377e-229	0.511029	0.9	0.637	9.91125e-225	4	ANXA7
CCT6A	7.5204e-289	0.506014	0.921	0.717	1.40007e-284	4	CCT6A	1.54637e-216	0.506014	0.921	0.717	2.87888e-212	4	CCT6A
MIR205HG1	4.47729e-280	0.726126	0.989	0.759	8.33538e-276	4	MIR205HG	5.04572e-254	0.726126	0.989	0.759	9.39361e-250	4	MIR205HG
SBSN	1.06677e-275	0.68935	0.785	0.32	1.986e-271	4	SBSN	0	0.68935	0.785	0.32	0	4	SBSN
C19orf331	4.6031e-272	0.594593	0.871	0.434	8.56959e-268	4	C19orf33	2.08539e-281	0.594593	0.871	0.434	3.88237e-277	4	C19orf33
FDPS	2.25375e-271	0.550857	0.868	0.539	4.19582e-267	4	FDPS	7.35854e-238	0.550857	0.868	0.539	1.36994e-233	4	FDPS
ERO1L	1.6857e-265	0.637107	0.576	0.27	3.13827e-261	4	ERO1L	1.33363e-179	0.637107	0.576	0.27	2.48282e-175	4	ERO1L
PDLIM7	1.10428e-262	0.535182	0.674	0.271	2.05583e-258	4	PDLIM7	1.55452e-282	0.535182	0.674	0.271	2.89405e-278	4	PDLIM7
C20orf241	1.41237e-262	0.502704	0.832	0.545	2.6294e-258	4	C20orf24	3.59058e-201	0.502704	0.832	0.545	6.68457e-197	4	C20orf24
EIF4EBP1	2.92319e-256	0.546778	0.781	0.43	5.4421e-252	4	EIF4EBP1	8.68359e-220	0.546778	0.781	0.43	1.61662e-215	4	EIF4EBP1
CISD11	1.72192e-252	0.564914	0.802	0.464	3.2057e-248	4	CISD1	8.53907e-212	0.564914	0.802	0.464	1.58972e-207	4	CISD1
ADH5	3.93222e-250	0.50009	0.753	0.387	7.32062e-246	4	ADH5	1.45337e-230	0.50009	0.753	0.387	2.70574e-226	4	ADH5
CD471	1.21086e-249	0.515956	0.903	0.669	2.25425e-245	4	CD47	2.95802e-203	0.515956	0.903	0.669	5.50694e-199	4	CD47
CA21	1.64299e-243	0.682716	0.832	0.419	3.05875e-239	4	CA2	2.83838e-260	0.682716	0.832	0.419	5.28421e-256	4	CA2
CENPW	2.58873e-240	0.626066	0.54	0.22	4.81944e-236	4	CENPW	9.67096e-215	0.626066	0.54	0.22	1.80044e-210	4	CENPW
NUDT1	4.85785e-239	0.51738	0.762	0.405	9.04387e-235	4	NUDT1	1.20114e-215	0.51738	0.762	0.405	2.23616e-211	4	NUDT1
ISG151	2.0068e-233	0.660427	0.83	0.408	3.73605e-229	4	ISG15	8.97143e-258	0.660427	0.83	0.408	1.67021e-253	4	ISG15
CKS2	1.38832e-208	0.93141	0.644	0.435	2.58463e-204	4	CKS2	1.00989e-85	0.93141	0.644	0.435	1.88012e-81	4	CKS2
C12orf751	1.20801e-203	0.761303	0.725	0.378	2.24895e-199	4	C12orf75	1.26814e-201	0.761303	0.725	0.378	2.3609e-197	4	C12orf75
TNFRSF12A1	3.50068e-201	0.701694	0.692	0.353	6.51721e-197	4	TNFRSF12A	4.78146e-192	0.701694	0.692	0.353	8.90164e-188	4	TNFRSF12A
PLIN2	4.12479e-200	0.698969	0.581	0.257	7.67912e-196	4	PLIN2	1.61893e-196	0.698969	0.581	0.257	3.01396e-192	4	PLIN2
GJB61	7.54462e-195	0.661567	0.669	0.278	1.40458e-190	4	GJB6	3.67764e-222	0.661567	0.669	0.278	6.84667e-218	4	GJB6
CKS1B	2.01363e-178	0.687588	0.628	0.378	3.74878e-174	4	CKS1B	2.15458e-119	0.687588	0.628	0.378	4.01119e-115	4	CKS1B
LGALS11	1.70022e-174	0.763026	0.925	0.611	3.16531e-170	4	LGALS1	6.93749e-155	0.763026	0.925	0.611	1.29155e-150	4	LGALS1
SERPINB11	3.0547e-167	0.606767	0.822	0.551	5.68694e-163	4	SERPINB1	2.87944e-154	0.606767	0.822	0.551	5.36065e-150	4	SERPINB1
SLC2A12	6.42135e-128	0.568237	0.809	0.558	1.19546e-123	4	SLC2A1	2.17386e-115	0.568237	0.809	0.558	4.04708e-111	4	SLC2A1
SOD21	1.45716e-116	0.543163	0.827	0.575	2.71279e-112	4	SOD2	4.64212e-121	0.543163	0.827	0.575	8.64224e-117	4	SOD2
COL1A1	0	4.27972	0.944	0.07	0	5	COL1A1	0	4.27972	0.944	0.07	0	5	COL1A1	Fibroblast cells
COL1A2	0	4.21218	0.972	0.037	0	5	COL1A2	0	4.21218	0.972	0.037	0	5	COL1A2
LUM	0	4.10226	0.913	0.038	0	5	LUM	0	4.10226	0.913	0.038	0	5	LUM
COL3A1	0	4.05229	0.924	0.021	0	5	COL3A1	0	4.05229	0.924	0.021	0	5	COL3A1
DCN	0	3.93947	0.928	0.228	0	5	DCN	0	3.93947	0.928	0.228	0	5	DCN
COL6A2	0	3.47264	0.982	0.049	0	5	COL6A2	0	3.47264	0.982	0.049	0	5	COL6A2
SPARC	0	3.11074	0.972	0.159	0	5	SPARC	0	3.11074	0.972	0.159	0	5	SPARC
COL6A1	0	2.90648	0.966	0.054	0	5	COL6A1	0	2.90648	0.966	0.054	0	5	COL6A1
COL6A3	0	2.70529	0.921	0.023	0	5	COL6A3	0	2.70529	0.921	0.023	0	5	COL6A3
CALD1	0	2.46524	0.983	0.355	0	5	CALD1	0	2.46524	0.983	0.355	0	5	CALD1
CPE	0	2.38573	0.867	0.022	0	5	CPE	0	2.38573	0.867	0.022	0	5	CPE
C1S1	0	2.29441	0.941	0.204	0	5	C1S	0	2.29441	0.941	0.204	0	5	C1S
CTSK	0	2.27659	0.896	0.076	0	5	CTSK	0	2.27659	0.896	0.076	0	5	CTSK
SFRP2	0	2.26326	0.696	0.005	0	5	SFRP2	0	2.26326	0.696	0.005	0	5	SFRP2
MMP2	0	2.23666	0.851	0.017	0	5	MMP2	0	2.23666	0.851	0.017	0	5	MMP2
FN1	0	2.20515	0.856	0.036	0	5	FN1	0	2.20515	0.856	0.036	0	5	FN1
PCOLCE	0	2.18279	0.897	0.029	0	5	PCOLCE	0	2.18279	0.897	0.029	0	5	PCOLCE
C1R1	0	2.16547	0.948	0.305	0	5	C1R	0	2.16547	0.948	0.305	0	5	C1R
IGFBP4	0	2.10973	0.895	0.101	0	5	IGFBP4	0	2.10973	0.895	0.101	0	5	IGFBP4
CTHRC1	0	2.07419	0.821	0.025	0	5	CTHRC1	0	2.07419	0.821	0.025	0	5	CTHRC1
COL5A2	0	2.04879	0.865	0.04	0	5	COL5A2	0	2.04879	0.865	0.04	0	5	COL5A2
SELM	0	2.04195	0.976	0.163	0	5	SELM	0	2.04195	0.976	0.163	0	5	SELM
POSTN	0	2.02625	0.66	0.095	0	5	POSTN	0	2.02625	0.66	0.095	0	5	POSTN
CCDC80	0	2.02461	0.725	0.039	0	5	CCDC80	0	2.02461	0.725	0.039	0	5	CCDC80
COL4A1	0	2.01015	0.721	0.02	0	5	COL4A1	0	2.01015	0.721	0.02	0	5	COL4A1
NNMT	0	2.0089	0.915	0.06	0	5	NNMT	0	2.0089	0.915	0.06	0	5	NNMT
BGN1	0	1.97963	0.815	0.153	0	5	BGN	0	1.97963	0.815	0.153	0	5	BGN
AEBP1	0	1.95747	0.945	0.049	0	5	AEBP1	0	1.95747	0.945	0.049	0	5	AEBP1
THY1	0	1.92472	0.791	0.005	0	5	THY1	0	1.92472	0.791	0.005	0	5	THY1
FSTL1	0	1.89573	0.903	0.037	0	5	FSTL1	0	1.89573	0.903	0.037	0	5	FSTL1
IGFBP7	0	1.86678	0.894	0.174	0	5	IGFBP7	0	1.86678	0.894	0.174	0	5	IGFBP7
SOD3	0	1.83994	0.741	0.042	0	5	SOD3	0	1.83994	0.741	0.042	0	5	SOD3
FBLN1	0	1.82547	0.62	0.168	0	5	FBLN1	0	1.82547	0.62	0.168	0	5	FBLN1
PRSS23	0	1.81488	0.818	0.099	0	5	PRSS23	0	1.81488	0.818	0.099	0	5	PRSS23
TNFAIP6	0	1.81227	0.729	0.016	0	5	TNFAIP6	0	1.81227	0.729	0.016	0	5	TNFAIP6
LGALS12	0	1.80155	0.998	0.612	0	5	LGALS1	0	1.80155	0.998	0.612	0	5	LGALS1
TIMP11	0	1.77005	0.988	0.535	0	5	TIMP1	0	1.77005	0.988	0.535	0	5	TIMP1
CTGF	0	1.74502	0.564	0.032	0	5	CTGF	0	1.74502	0.564	0.032	0	5	CTGF
CFH	0	1.73901	0.825	0.024	0	5	CFH	0	1.73901	0.825	0.024	0	5	CFH
MYL9	0	1.72878	0.789	0.051	0	5	MYL9	0	1.72878	0.789	0.051	0	5	MYL9
SPON2	0	1.72845	0.655	0.104	0	5	SPON2	0	1.72845	0.655	0.104	0	5	SPON2
RARRES2	0	1.72785	0.675	0.031	0	5	RARRES2	0	1.72785	0.675	0.031	0	5	RARRES2
SERPINF11	0	1.69551	0.915	0.281	0	5	SERPINF1	0	1.69551	0.915	0.281	0	5	SERPINF1
WNT5A	0	1.67858	0.601	0.061	0	5	WNT5A	0	1.67858	0.601	0.061	0	5	WNT5A
COL12A1	0	1.63684	0.763	0.045	0	5	COL12A1	0	1.63684	0.763	0.045	0	5	COL12A1
PRRX1	0	1.63525	0.881	0.002	0	5	PRRX1	0	1.63525	0.881	0.002	0	5	PRRX1
SERPING11	0	1.62232	0.914	0.221	0	5	SERPING1	0	1.62232	0.914	0.221	0	5	SERPING1
CNN3	0	1.58545	0.894	0.171	0	5	CNN3	0	1.58545	0.894	0.171	0	5	CNN3
TPM21	0	1.57092	0.757	0.11	0	5	TPM2	0	1.57092	0.757	0.11	0	5	TPM2
SERPINH11	0	1.51967	0.879	0.222	0	5	SERPINH1	0	1.51967	0.879	0.222	0	5	SERPINH1
COL4A2	0	1.48006	0.706	0.023	0	5	COL4A2	0	1.48006	0.706	0.023	0	5	COL4A2
VCAN	0	1.44663	0.772	0.061	0	5	VCAN	0	1.44663	0.772	0.061	0	5	VCAN
COL5A1	0	1.4257	0.763	0.028	0	5	COL5A1	0	1.4257	0.763	0.028	0	5	COL5A1
FBN1	0	1.36205	0.727	0.014	0	5	FBN1	0	1.36205	0.727	0.014	0	5	FBN1
C11orf96	0	1.34881	0.591	0.017	0	5	C11orf96	0	1.34881	0.591	0.017	0	5	C11orf96
TIMP2	0	1.33113	0.835	0.092	0	5	TIMP2	0	1.33113	0.835	0.092	0	5	TIMP2
LINC001521	0	1.31817	0.754	0.205	0	5	LINC00152	0	1.31817	0.754	0.205	0	5	LINC00152
TNC	0	1.29597	0.58	0.079	0	5	TNC	0	1.29597	0.58	0.079	0	5	TNC
FBLN2	0	1.28549	0.703	0.014	0	5	FBLN2	0	1.28549	0.703	0.014	0	5	FBLN2
FAP	0	1.2804	0.652	0.003	0	5	FAP	0	1.2804	0.652	0.003	0	5	FAP
CALU	0	1.26786	0.858	0.265	0	5	CALU	0	1.26786	0.858	0.265	0	5	CALU
PPAP2B	0	1.23347	0.589	0.037	0	5	PPAP2B	0	1.23347	0.589	0.037	0	5	PPAP2B
PDGFRB	0	1.22702	0.755	0.006	0	5	PDGFRB	0	1.22702	0.755	0.006	0	5	PDGFRB
OLFML3	0	1.21983	0.637	0.022	0	5	OLFML3	0	1.21983	0.637	0.022	0	5	OLFML3
TPM1	0	1.20064	0.742	0.244	0	5	TPM1	0	1.20064	0.742	0.244	0	5	TPM1
CHN1	0	1.18902	0.619	0.013	0	5	CHN1	0	1.18902	0.619	0.013	0	5	CHN1
STEAP1	0	1.18783	0.671	0.053	0	5	STEAP1	0	1.18783	0.671	0.053	0	5	STEAP1
EFEMP1	0	1.18517	0.632	0.132	0	5	EFEMP1	0	1.18517	0.632	0.132	0	5	EFEMP1
HTRA1	0	1.18245	0.739	0.131	0	5	HTRA1	0	1.18245	0.739	0.131	0	5	HTRA1
RCN3	0	1.17871	0.751	0.029	0	5	RCN3	0	1.17871	0.751	0.029	0	5	RCN3
GPM6B	0	1.15945	0.636	0.069	0	5	GPM6B	0	1.15945	0.636	0.069	0	5	GPM6B
TIMP3	0	1.15742	0.559	0.071	0	5	TIMP3	0	1.15742	0.559	0.071	0	5	TIMP3
INHBA	0	1.14751	0.524	0.05	0	5	INHBA	0	1.14751	0.524	0.05	0	5	INHBA
MEG3	0	1.14076	0.614	0.004	0	5	MEG3	0	1.14076	0.614	0.004	0	5	MEG3
PMP22	0	1.13377	0.823	0.109	0	5	PMP22	0	1.13377	0.823	0.109	0	5	PMP22
FKBP10	0	1.12839	0.741	0.013	0	5	FKBP10	0	1.12839	0.741	0.013	0	5	FKBP10
CTSL	0	1.12656	0.837	0.274	0	5	CTSL	0	1.12656	0.837	0.274	0	5	CTSL
TFPI	0	1.12641	0.571	0.021	0	5	TFPI	0	1.12641	0.571	0.021	0	5	TFPI
GREM1	0	1.12604	0.501	0.002	0	5	GREM1	0	1.12604	0.501	0.002	0	5	GREM1
LHFP	0	1.11162	0.711	0.038	0	5	LHFP	0	1.11162	0.711	0.038	0	5	LHFP
WBP51	0	1.11027	0.867	0.275	0	5	WBP5	0	1.11027	0.867	0.275	0	5	WBP5
PRKCDBP1	0	1.07332	0.806	0.213	0	5	PRKCDBP	0	1.07332	0.806	0.213	0	5	PRKCDBP
CLEC11A	0	1.06438	0.712	0.191	0	5	CLEC11A	0	1.06438	0.712	0.191	0	5	CLEC11A
MMP14	0	1.06108	0.787	0.27	0	5	MMP14	0	1.06108	0.787	0.27	0	5	MMP14
LOXL2	0	1.03757	0.583	0.004	0	5	LOXL2	0	1.03757	0.583	0.004	0	5	LOXL2
GGT5	0	1.03182	0.638	0.035	0	5	GGT5	0	1.03182	0.638	0.035	0	5	GGT5
S100A13	0	1.01397	0.798	0.296	0	5	S100A13	0	1.01397	0.798	0.296	0	5	S100A13
CRISPLD2	0	1.00684	0.672	0.095	0	5	CRISPLD2	0	1.00684	0.672	0.095	0	5	CRISPLD2
RCN1	0	1.00351	0.785	0.212	0	5	RCN1	0	1.00351	0.785	0.212	0	5	RCN1
MFGE8	0	0.99995	0.774	0.169	0	5	MFGE8	0	0.99995	0.774	0.169	0	5	MFGE8
MXRA8	0	0.989383	0.656	0.002	0	5	MXRA8	0	0.989383	0.656	0.002	0	5	MXRA8
CEBPB	0	0.987262	0.946	0.703	0	5	CEBPB	8.86882e-246	0.987262	0.946	0.703	1.65111e-241	5	CEBPB
LAMA4	0	0.982304	0.658	0.032	0	5	LAMA4	0	0.982304	0.658	0.032	0	5	LAMA4
GAS1	0	0.980175	0.598	0.146	0	5	GAS1	0	0.980175	0.598	0.146	0	5	GAS1
ISLR	0	0.969653	0.563	0.002	0	5	ISLR	0	0.969653	0.563	0.002	0	5	ISLR
EID11	0	0.962299	0.955	0.673	0	5	EID1	0	0.962299	0.955	0.673	0	5	EID1
SRPX	0	0.962033	0.513	0.047	0	5	SRPX	0	0.962033	0.513	0.047	0	5	SRPX
PDGFRA	0	0.95709	0.576	0.007	0	5	PDGFRA	0	0.95709	0.576	0.007	0	5	PDGFRA
TNFRSF21	0	0.955524	0.503	0.116	0	5	TNFRSF21	0	0.955524	0.503	0.116	0	5	TNFRSF21
GEM	0	0.952508	0.534	0.073	0	5	GEM	0	0.952508	0.534	0.073	0	5	GEM
ARF4	0	0.949684	0.915	0.636	0	5	ARF4	4.14799e-300	0.949684	0.915	0.636	7.72232e-296	5	ARF4
EFEMP2	0	0.948648	0.676	0.023	0	5	EFEMP2	0	0.948648	0.676	0.023	0	5	EFEMP2
RABAC1	0	0.948359	0.929	0.599	0	5	RABAC1	0	0.948359	0.929	0.599	0	5	RABAC1
SPHK1	0	0.943977	0.611	0.09	0	5	SPHK1	0	0.943977	0.611	0.09	0	5	SPHK1
IFITM22	0	0.928177	0.904	0.344	0	5	IFITM2	0	0.928177	0.904	0.344	0	5	IFITM2
PTK7	0	0.922126	0.667	0.127	0	5	PTK7	0	0.922126	0.667	0.127	0	5	PTK7
ITGB11	0	0.918446	0.937	0.539	0	5	ITGB1	0	0.918446	0.937	0.539	0	5	ITGB1
GUCY1A3	0	0.908616	0.502	0.016	0	5	GUCY1A3	0	0.908616	0.502	0.016	0	5	GUCY1A3
CD59	0	0.900874	0.961	0.641	0	5	CD59	8.91934e-307	0.900874	0.961	0.641	1.66051e-302	5	CD59
ARID5B	0	0.900101	0.788	0.346	0	5	ARID5B	8.92963e-284	0.900101	0.788	0.346	1.66243e-279	5	ARID5B
ITGA1	0	0.892406	0.555	0.012	0	5	ITGA1	0	0.892406	0.555	0.012	0	5	ITGA1
OSTC	0	0.892017	0.907	0.665	0	5	OSTC	8.10602e-257	0.892017	0.907	0.665	1.5091e-252	5	OSTC
MIR4435-1HG	0	0.882873	0.637	0.151	0	5	MIR4435-1HG	0	0.882873	0.637	0.151	0	5	MIR4435-1HG
COL18A1	0	0.876593	0.534	0.224	0	5	COL18A1	1.75319e-148	0.876593	0.534	0.224	3.26392e-144	5	COL18A1
PPIC	0	0.862373	0.71	0.301	0	5	PPIC	1.50704e-244	0.862373	0.71	0.301	2.80565e-240	5	PPIC
PAM	0	0.861127	0.649	0.07	0	5	PAM	0	0.861127	0.649	0.07	0	5	PAM
SDC2	0	0.857715	0.656	0.113	0	5	SDC2	0	0.857715	0.656	0.113	0	5	SDC2
KDELR21	0	0.857458	0.899	0.603	0	5	KDELR2	3.23945e-276	0.857458	0.899	0.603	6.03088e-272	5	KDELR2
TCF4	0	0.856605	0.755	0.289	0	5	TCF4	3.5506e-307	0.856605	0.755	0.289	6.61015e-303	5	TCF4
GPX8	0	0.852913	0.619	0.048	0	5	GPX8	0	0.852913	0.619	0.048	0	5	GPX8
FGFR1	0	0.851896	0.599	0.026	0	5	FGFR1	0	0.851896	0.599	0.026	0	5	FGFR1
RRBP1	0	0.848927	0.829	0.451	0	5	RRBP1	2.79645e-266	0.848927	0.829	0.451	5.20615e-262	5	RRBP1
LRP1	0	0.847575	0.6	0.1	0	5	LRP1	0	0.847575	0.6	0.1	0	5	LRP1
CD248	0	0.835413	0.53	0.036	0	5	CD248	0	0.835413	0.53	0.036	0	5	CD248
HIF1A	0	0.834952	0.793	0.527	0	5	HIF1A	6.32571e-166	0.834952	0.793	0.527	1.17766e-161	5	HIF1A
ECM1	0	0.831455	0.68	0.126	0	5	ECM1	0	0.831455	0.68	0.126	0	5	ECM1
COX7A1	0	0.823289	0.599	0.024	0	5	COX7A1	0	0.823289	0.599	0.024	0	5	COX7A1
ADAMTS2	0	0.813062	0.569	0.003	0	5	ADAMTS2	0	0.813062	0.569	0.003	0	5	ADAMTS2
NGFRAP11	0	0.793402	0.792	0.35	0	5	NGFRAP1	1.26533e-267	0.793402	0.792	0.35	2.35567e-263	5	NGFRAP1
MFAP2	0	0.787565	0.569	0.044	0	5	MFAP2	0	0.787565	0.569	0.044	0	5	MFAP2
EMILIN1	0	0.78498	0.599	0.011	0	5	EMILIN1	0	0.78498	0.599	0.011	0	5	EMILIN1
PMEPA1	0	0.78027	0.568	0.14	0	5	PMEPA1	0	0.78027	0.568	0.14	0	5	PMEPA1
RAB13	0	0.774336	0.778	0.481	0	5	RAB13	4.86891e-189	0.774336	0.778	0.481	9.06445e-185	5	RAB13
DDR2	0	0.772015	0.602	0.018	0	5	DDR2	0	0.772015	0.602	0.018	0	5	DDR2
LAMC1	0	0.763622	0.639	0.077	0	5	LAMC1	0	0.763622	0.639	0.077	0	5	LAMC1
STEAP2	0	0.753125	0.511	0.023	0	5	STEAP2	0	0.753125	0.511	0.023	0	5	STEAP2
BICC1	0	0.752883	0.556	0.011	0	5	BICC1	0	0.752883	0.556	0.011	0	5	BICC1
CDH11	0	0.732646	0.569	0.013	0	5	CDH11	0	0.732646	0.569	0.013	0	5	CDH11
LMAN12	0	0.722368	0.724	0.35	0	5	LMAN1	4.27401e-217	0.722368	0.724	0.35	7.95693e-213	5	LMAN1
FMOD	0	0.72217	0.519	0.004	0	5	FMOD	0	0.72217	0.519	0.004	0	5	FMOD
RHOBTB3	0	0.719453	0.587	0.056	0	5	RHOBTB3	0	0.719453	0.587	0.056	0	5	RHOBTB3
ANGPTL2	0	0.689528	0.532	0.059	0	5	ANGPTL2	0	0.689528	0.532	0.059	0	5	ANGPTL2
TMEM165	0	0.688391	0.83	0.594	0	5	TMEM165	1.01531e-154	0.688391	0.83	0.594	1.8902e-150	5	TMEM165
ASPH	0	0.687092	0.731	0.344	0	5	ASPH	1.93338e-217	0.687092	0.731	0.344	3.59937e-213	5	ASPH
ANTXR1	0	0.673913	0.574	0.157	0	5	ANTXR1	1.78369e-300	0.673913	0.574	0.157	3.3207e-296	5	ANTXR1
CERCAM	0	0.671998	0.501	0.029	0	5	CERCAM	0	0.671998	0.501	0.029	0	5	CERCAM
TGFB1I1	0	0.66706	0.538	0.052	0	5	TGFB1I1	0	0.66706	0.538	0.052	0	5	TGFB1I1
LEPROT	0	0.664821	0.763	0.444	0	5	LEPROT	4.18836e-179	0.664821	0.763	0.444	7.79747e-175	5	LEPROT
GNG11	0	0.647477	0.61	0.049	0	5	GNG11	0	0.647477	0.61	0.049	0	5	GNG11
P4HA2	0	0.642944	0.559	0.152	0	5	P4HA2	1.33282e-289	0.642944	0.559	0.152	2.48132e-285	5	P4HA2
BMP1	0	0.637209	0.559	0.081	0	5	BMP1	0	0.637209	0.559	0.081	0	5	BMP1
NDN	0	0.635539	0.55	0.064	0	5	NDN	0	0.635539	0.55	0.064	0	5	NDN
FARP1	0	0.634831	0.556	0.046	0	5	FARP1	0	0.634831	0.556	0.046	0	5	FARP1
NID1	0	0.627123	0.502	0.025	0	5	NID1	0	0.627123	0.502	0.025	0	5	NID1
FAM114A1	0	0.53226	0.542	0.133	0	5	FAM114A1	0	0.53226	0.542	0.133	0	5	FAM114A1
IL1R1	2.335404e-318	0.612992	0.536	0.134	4.3478213326e-314	5	IL1R1	1.03775e-307	0.612992	0.536	0.134	1.93197e-303	5	IL1R1
2020-09-11	1.5479996e-317	0.663956	0.567	0.142	2.88191078947e-313	5	2020-09-11	0	0.663956	0.567	0.142	0	5	2020-09-11
SPATS2L	1.3345772799123e-311	0.687662	0.638	0.329	2.48458e-307	5	SPATS2L	3.75538e-143	0.687662	0.638	0.329	6.99139e-139	5	SPATS2L
PHLDA1	0	1.06767	0.672	0.176	2.77603e-304	5	PHLDA1	0	1.06767	0.672	0.176	0	5	PHLDA1
IL321	3.42711e-308	0.984082	0.694	0.148	6.38025e-304	5	IL32	0	0.984082	0.694	0.148	0	5	IL32
C19orf101	5.51385e-306	0.637613	0.873	0.616	1.02651e-301	5	C19orf10	9.4946e-190	0.637613	0.873	0.616	1.76761e-185	5	C19orf10
TRAM1	2.22209e-305	0.658463	0.825	0.481	4.13687e-301	5	TRAM1	4.87475e-211	0.658463	0.825	0.481	9.07532e-207	5	TRAM1
TSPAN41	1.91893e-301	0.694491	0.663	0.216	3.57248e-297	5	TSPAN4	6.9344e-288	0.694491	0.663	0.216	1.29098e-283	5	TSPAN4
PTRF1	6.60713e-301	0.789846	0.799	0.311	1.23005e-296	5	PTRF	1.4466e-297	0.789846	0.799	0.311	2.69314e-293	5	PTRF
MORF4L2	4.80433e-300	0.626978	0.899	0.674	8.94421e-296	5	MORF4L2	6.42681e-184	0.626978	0.899	0.674	1.19648e-179	5	MORF4L2
THBS2	5.99437e-296	0.890076	0.688	0.196	1.11597e-291	5	THBS2	0	0.890076	0.688	0.196	0	5	THBS2
AKR1B1	1.20741e-291	0.906008	0.536	0.25	2.24783e-287	5	AKR1B1	7.555e-121	0.906008	0.536	0.25	1.40652e-116	5	AKR1B1
LTBP1	1.47756e-290	0.651352	0.535	0.104	2.75076e-286	5	LTBP1	0	0.651352	0.535	0.104	0	5	LTBP1
VIM2	1.82123e-283	0.931046	0.989	0.549	3.39058e-279	5	VIM	3.75496e-238	0.931046	0.989	0.549	6.99062e-234	5	VIM
MAGED2	5.61063e-282	0.647622	0.683	0.291	1.04453e-277	5	MAGED2	3.28977e-214	0.647622	0.683	0.291	6.12457e-210	5	MAGED2
MYO1B1	4.5004e-275	0.690126	0.649	0.195	8.37839e-271	5	MYO1B	1.12143e-303	0.690126	0.649	0.195	2.08776e-299	5	MYO1B
ADM1	4.22502e-273	1.28251	0.554	0.171	7.86572e-269	5	ADM	2.16709e-247	1.28251	0.554	0.171	4.03447e-243	5	ADM
SERPINE2	2.88154e-265	0.814507	0.513	0.077	5.36456e-261	5	SERPINE2	0	0.814507	0.513	0.077	0	5	SERPINE2
SNAI2	7.87164e-264	0.793341	0.661	0.277	1.46546e-259	5	SNAI2	1.88094e-201	0.793341	0.661	0.277	3.50174e-197	5	SNAI2
SEC62	9.09569e-263	0.577558	0.901	0.674	1.69334e-258	5	SEC62	3.72499e-185	0.577558	0.901	0.674	6.93481e-181	5	SEC62
SOD22	4.54004e-259	1.04542	0.859	0.576	8.45219e-255	5	SOD2	1.35996e-188	1.04542	0.859	0.576	2.53184e-184	5	SOD2
ANPEP	2.07227e-255	0.580752	0.502	0.077	3.85795e-251	5	ANPEP	0	0.580752	0.502	0.077	0	5	ANPEP
MRC2	2.0291e-252	0.507151	0.511	0.13	3.77758e-248	5	MRC2	2.55793e-274	0.507151	0.511	0.13	4.76209e-270	5	MRC2
FNDC3B	2.39842e-248	0.501793	0.528	0.136	4.46513e-244	5	FNDC3B	6.32155e-279	0.501793	0.528	0.136	1.17688e-274	5	FNDC3B
PDLIM2	6.36592e-247	0.60887	0.696	0.342	1.18514e-242	5	PDLIM2	2.86845e-174	0.60887	0.696	0.342	5.34019e-170	5	PDLIM2
PGRMC1	3.79965e-242	0.551847	0.678	0.38	7.07382e-238	5	PGRMC1	1.34277e-132	0.551847	0.678	0.38	2.49984e-128	5	PGRMC1
DAB2	8.45605e-241	0.63052	0.549	0.109	1.57426e-236	5	DAB2	0	0.63052	0.549	0.109	0	5	DAB2
NBL12	2.01099e-238	0.716686	0.771	0.438	3.74386e-234	5	NBL1	1.05274e-160	0.716686	0.771	0.438	1.95989e-156	5	NBL1
SNX9	7.10765e-237	0.53111	0.555	0.204	1.32323e-232	5	SNX9	1.05041e-183	0.53111	0.555	0.204	1.95554e-179	5	SNX9
PDPN	8.00475e-235	0.673793	0.51	0.109	1.49024e-230	5	PDPN	0	0.673793	0.51	0.109	0	5	PDPN
SPRY1	5.45533e-227	0.600822	0.503	0.117	1.01562e-222	5	SPRY1	2.37812e-302	0.600822	0.503	0.117	4.42735e-298	5	SPRY1
SSR3	6.86696e-227	0.579948	0.793	0.548	1.27842e-222	5	SSR3	1.29488e-128	0.579948	0.793	0.548	2.41068e-124	5	SSR3
PPFIBP1	1.31362e-221	0.525077	0.538	0.186	2.44557e-217	5	PPFIBP1	1.00891e-197	0.525077	0.538	0.186	1.87828e-193	5	PPFIBP1
VKORC12	9.85095e-217	0.561273	0.791	0.499	1.83395e-212	5	VKORC1	6.61963e-152	0.561273	0.791	0.499	1.23238e-147	5	VKORC1
2020-09-15	6.83389e-214	0.514917	0.838	0.627	1.27227e-209	5	2020-09-15	1.00866e-131	0.514917	0.838	0.627	1.87781e-127	5	2020-09-15
EMP11	9.08651e-214	0.739928	0.91	0.574	1.69164e-209	5	EMP1	3.5762e-192	0.739928	0.91	0.574	6.65782e-188	5	EMP1
S100A42	4.09746e-213	0.538094	0.986	0.612	7.62824e-209	5	S100A4	1.06218e-188	0.538094	0.986	0.612	1.97746e-184	5	S100A4
ANXA51	1.13248e-212	0.662465	0.955	0.663	2.10833e-208	5	ANXA5	6.47491e-198	0.662465	0.955	0.663	1.20543e-193	5	ANXA5
SLC16A31	2.07828e-209	0.813586	0.613	0.218	3.86913e-205	5	SLC16A3	4.3748e-220	0.813586	0.613	0.218	8.14456e-216	5	SLC16A3
RAB34	1.23504e-208	0.506271	0.656	0.313	2.29927e-204	5	RAB34	8.72553e-156	0.506271	0.656	0.313	1.62443e-151	5	RAB34
TMEM176B	1.30575e-204	0.608498	0.608	0.165	2.43092e-200	5	TMEM176B	1.17284e-258	0.608498	0.608	0.165	2.18347e-254	5	TMEM176B
FILIP1L	1.33214e-203	0.706074	0.505	0.137	2.48004e-199	5	FILIP1L	2.37939e-247	0.706074	0.505	0.137	4.4297e-243	5	FILIP1L
CYR61	7.98028e-200	1.29293	0.611	0.224	1.48569e-195	5	CYR61	1.12163e-207	1.29293	0.611	0.224	2.08813e-203	5	CYR61
C12orf572	8.52475e-200	0.555593	0.882	0.622	1.58705e-195	5	C12orf57	2.90461e-157	0.555593	0.882	0.622	5.4075e-153	5	C12orf57
ANKRD28	1.3517e-193	0.505485	0.523	0.141	2.51646e-189	5	ANKRD28	1.18014e-253	0.505485	0.523	0.141	2.19706e-249	5	ANKRD28
EMP32	3.14355e-193	0.637653	0.89	0.443	5.85235e-189	5	EMP3	1.19293e-198	0.637653	0.89	0.443	2.22088e-194	5	EMP3
VMP1	4.04051e-193	0.634629	0.892	0.616	7.52222e-189	5	VMP1	1.95318e-156	0.634629	0.892	0.616	3.63624e-152	5	VMP1
ID3	2.03524e-191	1.03688	0.6	0.356	3.789e-187	5	ID3	6.95706e-96	1.03688	0.6	0.356	1.2952e-91	5	ID3
AXL	3.21785e-190	0.515527	0.577	0.154	5.99067e-186	5	AXL	4.14458e-259	0.515527	0.577	0.154	7.71597e-255	5	AXL
PDLIM4	1.21039e-187	0.672907	0.568	0.242	2.25338e-183	5	PDLIM4	1.0759e-147	0.672907	0.568	0.242	2.00301e-143	5	PDLIM4
REXO21	2.43252e-186	0.53183	0.806	0.51	4.52863e-182	5	REXO2	7.23743e-147	0.53183	0.806	0.51	1.34739e-142	5	REXO2
PRDX42	7.43584e-180	0.52931	0.72	0.443	1.38433e-175	5	PRDX4	2.81439e-122	0.52931	0.72	0.443	5.23955e-118	5	PRDX4
AHR	7.28232e-178	0.539127	0.594	0.297	1.35575e-173	5	AHR	5.67797e-123	0.539127	0.594	0.297	1.05707e-118	5	AHR
BNIP3L	7.53873e-168	0.577899	0.645	0.367	1.40349e-163	5	BNIP3L	1.04774e-108	0.577899	0.645	0.367	1.95057e-104	5	BNIP3L
IER3	2.66598e-164	0.983771	0.708	0.476	4.96325e-160	5	IER3	3.01232e-95	0.983771	0.708	0.476	5.60803e-91	5	IER3
CAV11	2.18349e-159	0.74914	0.796	0.405	4.06501e-155	5	CAV1	3.93324e-169	0.74914	0.796	0.405	7.32252e-165	5	CAV1
LDHB1	2.1315e-157	0.589073	0.814	0.443	3.96821e-153	5	LDHB	3.39685e-167	0.589073	0.814	0.443	6.32391e-163	5	LDHB
IFITM1	1.05256e-146	0.502229	0.537	0.173	1.95956e-142	5	IFITM1	1.16125e-194	0.502229	0.537	0.173	2.1619e-190	5	IFITM1
LGALS3BP	5.02153e-141	0.63219	0.68	0.407	9.34858e-137	5	LGALS3BP	1.11828e-109	0.63219	0.68	0.407	2.0819e-105	5	LGALS3BP
LY6E3	1.79585e-131	0.552646	0.936	0.72	3.34334e-127	5	LY6E	3.82978e-129	0.552646	0.936	0.72	7.12989e-125	5	LY6E
HES4	3.58249e-126	0.530097	0.503	0.211	6.66952e-122	5	HES4	3.2799e-125	0.530097	0.503	0.211	6.10619e-121	5	HES4
TNFRSF12A2	4.43423e-92	0.558456	0.628	0.357	8.25521e-88	5	TNFRSF12A	8.72245e-90	0.558456	0.628	0.357	1.62386e-85	5	TNFRSF12A
SOX4	3.36676e-86	0.504577	0.587	0.291	6.26789e-82	5	SOX4	3.55649e-100	0.504577	0.587	0.291	6.62112e-96	5	SOX4
TSC22D1	1.78131e-71	0.512991	0.59	0.355	3.31627e-67	5	TSC22D1	1.23349e-67	0.512991	0.59	0.355	2.29639e-63	5	TSC22D1
DCT	0	4.4979	0.891	0.033	0	6	DCT	0	4.4979	0.891	0.033	0	6	DCT	Melanocytes
PMEL	0	4.28066	0.996	0.069	0	6	PMEL	0	4.28066	0.996	0.069	0	6	PMEL
TYRP1	0	4.25523	0.989	0.048	0	6	TYRP1	0	4.25523	0.989	0.048	0	6	TYRP1
MLANA	0	3.60342	0.964	0.036	0	6	MLANA	0	3.60342	0.964	0.036	0	6	MLANA
QPCT	0	2.76659	0.991	0.156	0	6	QPCT	0	2.76659	0.991	0.156	0	6	QPCT
FRZB	0	2.59139	0.899	0.018	0	6	FRZB	0	2.59139	0.899	0.018	0	6	FRZB
IGFBP71	0	2.49817	0.911	0.174	0	6	IGFBP7	0	2.49817	0.911	0.174	0	6	IGFBP7
CAPN3	0	1.98095	0.852	0.029	0	6	CAPN3	0	1.98095	0.852	0.029	0	6	CAPN3
TYR	0	1.92464	0.911	0.006	0	6	TYR	0	1.92464	0.911	0.006	0	6	TYR
MITF	0	1.91159	0.918	0.04	0	6	MITF	0	1.91159	0.918	0.04	0	6	MITF
CD591	0	1.84908	0.997	0.641	0	6	CD59	0	1.84908	0.997	0.641	0	6	CD59
GPM6B1	0	1.8392	0.97	0.064	0	6	GPM6B	0	1.8392	0.97	0.064	0	6	GPM6B
SNCA	0	1.80775	0.972	0.11	0	6	SNCA	0	1.80775	0.972	0.11	0	6	SNCA
EDNRB	0	1.78467	0.953	0.015	0	6	EDNRB	0	1.78467	0.953	0.015	0	6	EDNRB
APOD	0	1.77153	0.882	0.032	0	6	APOD	0	1.77153	0.882	0.032	0	6	APOD
PMP221	0	1.75789	0.962	0.107	0	6	PMP22	0	1.75789	0.962	0.107	0	6	PMP22
PLP1	0	1.74552	0.908	0.004	0	6	PLP1	0	1.74552	0.908	0.004	0	6	PLP1
GMPR	0	1.71186	0.923	0.02	0	6	GMPR	0	1.71186	0.923	0.02	0	6	GMPR
EMP33	0	1.69544	0.993	0.441	0	6	EMP3	0	1.69544	0.993	0.441	0	6	EMP3
CRYAB	0	1.69005	0.915	0.193	0	6	CRYAB	0	1.69005	0.915	0.193	0	6	CRYAB
VIM3	0	1.65491	1	0.55	0	6	VIM	0	1.65491	1	0.55	0	6	VIM
LGALS3BP1	0	1.65072	0.964	0.402	0	6	LGALS3BP	0	1.65072	0.964	0.402	0	6	LGALS3BP
MFSD12	0	1.63086	0.88	0.197	0	6	MFSD12	0	1.63086	0.88	0.197	0	6	MFSD12
MCOLN3	0	1.60402	0.909	0.012	0	6	MCOLN3	0	1.60402	0.909	0.012	0	6	MCOLN3
CYB561A3	0	1.59414	0.863	0.219	0	6	CYB561A3	0	1.59414	0.863	0.219	0	6	CYB561A3
CALD11	0	1.55206	0.988	0.355	0	6	CALD1	0	1.55206	0.988	0.355	0	6	CALD1
APOE1	0	1.55172	0.984	0.514	0	6	APOE	0	1.55172	0.984	0.514	0	6	APOE
IFI272	0	1.53957	0.951	0.731	0	6	IFI27	0	1.53957	0.951	0.731	0	6	IFI27
NOV	0	1.53952	0.648	0.036	0	6	NOV	0	1.53952	0.648	0.036	0	6	NOV
C4orf481	0	1.51471	0.965	0.261	0	6	C4orf48	0	1.51471	0.965	0.261	0	6	C4orf48
BACE2	0	1.51264	0.934	0.117	0	6	BACE2	0	1.51264	0.934	0.117	0	6	BACE2
SDCBP3	0	1.48512	0.988	0.535	0	6	SDCBP	0	1.48512	0.988	0.535	0	6	SDCBP
TRPM1	0	1.47342	0.8	0.003	0	6	TRPM1	0	1.47342	0.8	0.003	0	6	TRPM1
PCSK2	0	1.45474	0.668	0.006	0	6	PCSK2	0	1.45474	0.668	0.006	0	6	PCSK2
TFAP2B	0	1.43173	0.811	0.033	0	6	TFAP2B	0	1.43173	0.811	0.033	0	6	TFAP2B
RAB321	0	1.42155	0.944	0.261	0	6	RAB32	0	1.42155	0.944	0.261	0	6	RAB32
SLC24A5	0	1.42098	0.841	0.003	0	6	SLC24A5	0	1.42098	0.841	0.003	0	6	SLC24A5
TIMP21	0	1.37775	0.911	0.091	0	6	TIMP2	0	1.37775	0.911	0.091	0	6	TIMP2
NSG11	0	1.37478	0.962	0.39	0	6	NSG1	0	1.37478	0.962	0.39	0	6	NSG1
GPR155	0	1.36199	0.822	0.144	0	6	GPR155	0	1.36199	0.822	0.144	0	6	GPR155
GPNMB2	0	1.36193	0.991	0.616	0	6	GPNMB	0	1.36193	0.991	0.616	0	6	GPNMB
KIT	0	1.34817	0.874	0.008	0	6	KIT	0	1.34817	0.874	0.008	0	6	KIT
MYO5A	0	1.3468	0.902	0.182	0	6	MYO5A	0	1.3468	0.902	0.182	0	6	MYO5A
CDC42EP3	0	1.32393	0.909	0.101	0	6	CDC42EP3	0	1.32393	0.909	0.101	0	6	CDC42EP3
TTC31	0	1.31925	0.916	0.4	0	6	TTC3	0	1.31925	0.916	0.4	0	6	TTC3
SLC25A4	0	1.30784	0.852	0.111	0	6	SLC25A4	0	1.30784	0.852	0.111	0	6	SLC25A4
OSTM1	0	1.29115	0.872	0.162	0	6	OSTM1	0	1.29115	0.872	0.162	0	6	OSTM1
GPR143	0	1.26323	0.803	0.011	0	6	GPR143	0	1.26323	0.803	0.011	0	6	GPR143
VAMP51	0	1.26145	0.918	0.293	0	6	VAMP5	0	1.26145	0.918	0.293	0	6	VAMP5
ASAH1	0	1.25988	0.93	0.392	0	6	ASAH1	0	1.25988	0.93	0.392	0	6	ASAH1
MARCKSL1	0	1.22854	0.959	0.339	0	6	MARCKSL1	0	1.22854	0.959	0.339	0	6	MARCKSL1
TUBB2B	0	1.22528	0.743	0.013	0	6	TUBB2B	0	1.22528	0.743	0.013	0	6	TUBB2B
SPARC1	0	1.21948	0.938	0.161	0	6	SPARC	0	1.21948	0.938	0.161	0	6	SPARC
GYPC1	0	1.2179	0.863	0.095	0	6	GYPC	0	1.2179	0.863	0.095	0	6	GYPC
MLEC	0	1.20553	0.913	0.372	0	6	MLEC	0	1.20553	0.913	0.372	0	6	MLEC
SYNGR1	0	1.17917	0.865	0.252	0	6	SYNGR1	0	1.17917	0.865	0.252	0	6	SYNGR1
MAGED21	0	1.1445	0.91	0.287	0	6	MAGED2	0	1.1445	0.91	0.287	0	6	MAGED2
LGALS13	0	1.13699	0.998	0.613	0	6	LGALS1	0	1.13699	0.998	0.613	0	6	LGALS1
PRKCDBP2	0	1.13326	0.869	0.213	0	6	PRKCDBP	0	1.13326	0.869	0.213	0	6	PRKCDBP
GNG111	0	1.12393	0.797	0.046	0	6	GNG11	0	1.12393	0.797	0.046	0	6	GNG11
FEZ1	0	1.11982	0.779	0.022	0	6	FEZ1	0	1.11982	0.779	0.022	0	6	FEZ1
HMG20B	0	1.11764	0.913	0.409	0	6	HMG20B	0	1.11764	0.913	0.409	0	6	HMG20B
BCAN	0	1.10993	0.538	0.002	0	6	BCAN	0	1.10993	0.538	0.002	0	6	BCAN
INPP4B	0	1.10754	0.798	0.022	0	6	INPP4B	0	1.10754	0.798	0.022	0	6	INPP4B
CYSTM1	0	1.09127	0.91	0.28	0	6	CYSTM1	0	1.09127	0.91	0.28	0	6	CYSTM1
FMN1	0	1.08545	0.798	0.029	0	6	FMN1	0	1.08545	0.798	0.029	0	6	FMN1
S100A131	0	1.08105	0.886	0.295	0	6	S100A13	0	1.08105	0.886	0.295	0	6	S100A13
ECM11	0	1.08061	0.775	0.125	0	6	ECM1	0	1.08061	0.775	0.125	0	6	ECM1
CD991	0	1.07297	0.984	0.708	0	6	CD99	0	1.07297	0.984	0.708	0	6	CD99
GPR56	0	1.07028	0.809	0.144	0	6	GPR56	0	1.07028	0.809	0.144	0	6	GPR56
EID12	0	1.06644	0.981	0.673	0	6	EID1	0	1.06644	0.981	0.673	0	6	EID1
PAG1	0	1.04147	0.79	0.087	0	6	PAG1	0	1.04147	0.79	0.087	0	6	PAG1
WIPI1	0	1.03679	0.817	0.091	0	6	WIPI1	0	1.03679	0.817	0.091	0	6	WIPI1
TUBA1A1	0	1.02811	0.941	0.494	0	6	TUBA1A	0	1.02811	0.941	0.494	0	6	TUBA1A
TBC1D16	0	1.02681	0.768	0.048	0	6	TBC1D16	0	1.02681	0.768	0.048	0	6	TBC1D16
EMP12	0	1.01667	0.978	0.573	0	6	EMP1	0	1.01667	0.978	0.573	0	6	EMP1
CTSK1	0	1.01602	0.77	0.079	0	6	CTSK	0	1.01602	0.77	0.079	0	6	CTSK
AEBP11	0	1.01582	0.803	0.053	0	6	AEBP1	0	1.01582	0.803	0.053	0	6	AEBP1
ST3GAL4	0	1.01269	0.771	0.061	0	6	ST3GAL4	0	1.01269	0.771	0.061	0	6	ST3GAL4
PHLDA11	0	0.999719	0.878	0.173	0	6	PHLDA1	0	0.999719	0.878	0.173	0	6	PHLDA1
GSTO1	0	0.998927	0.945	0.669	0	6	GSTO1	1.30879e-295	0.998927	0.945	0.669	2.43658e-291	6	GSTO1
LDHB2	0	0.992588	0.928	0.441	0	6	LDHB	0	0.992588	0.928	0.441	0	6	LDHB
STX7	0	0.991183	0.863	0.284	0	6	STX7	0	0.991183	0.863	0.284	0	6	STX7
ITGB12	0	0.984045	0.959	0.539	0	6	ITGB1	0	0.984045	0.959	0.539	0	6	ITGB1
VAT1	0	0.982976	0.798	0.116	0	6	VAT1	0	0.982976	0.798	0.116	0	6	VAT1
PLXNC1	0	0.979329	0.796	0.113	0	6	PLXNC1	0	0.979329	0.796	0.113	0	6	PLXNC1
ARL21	0	0.975173	0.899	0.424	0	6	ARL2	0	0.975173	0.899	0.424	0	6	ARL2
FCRLA	0	0.971681	0.608	0.006	0	6	FCRLA	0	0.971681	0.608	0.006	0	6	FCRLA
LYST	0	0.955498	0.857	0.235	0	6	LYST	0	0.955498	0.857	0.235	0	6	LYST
PRELP	0	0.951179	0.561	0.006	0	6	PRELP	0	0.951179	0.561	0.006	0	6	PRELP
MLPH	0	0.941999	0.729	0.007	0	6	MLPH	0	0.941999	0.729	0.007	0	6	MLPH
BRI31	0	0.939832	0.91	0.48	0	6	BRI3	0	0.939832	0.91	0.48	0	6	BRI3
PLEKHA5	0	0.927178	0.809	0.147	0	6	PLEKHA5	0	0.927178	0.809	0.147	0	6	PLEKHA5
RP11-93B14.5	0	0.925321	0.573	0.003	0	6	RP11-93B14.5	0	0.925321	0.573	0.003	0	6	RP11-93B14.5
SERPINE21	0	0.920947	0.706	0.074	0	6	SERPINE2	0	0.920947	0.706	0.074	0	6	SERPINE2
IFI27L2	0	0.9206	0.915	0.491	0	6	IFI27L2	0	0.9206	0.915	0.491	0	6	IFI27L2
PRKD3	0	0.918128	0.715	0.124	0	6	PRKD3	0	0.918128	0.715	0.124	0	6	PRKD3
TFAP2A1	0	0.912725	0.89	0.41	0	6	TFAP2A	0	0.912725	0.89	0.41	0	6	TFAP2A
CPQ	0	0.907176	0.775	0.141	0	6	CPQ	0	0.907176	0.775	0.141	0	6	CPQ
MYO10	0	0.905261	0.816	0.174	0	6	MYO10	0	0.905261	0.816	0.174	0	6	MYO10
CISD12	0	0.904524	0.895	0.466	0	6	CISD1	0	0.904524	0.895	0.466	0	6	CISD1
ANXA52	0	0.902914	0.993	0.662	0	6	ANXA5	0	0.902914	0.993	0.662	0	6	ANXA5
H2AFJ1	0	0.889308	0.915	0.53	0	6	H2AFJ	0	0.889308	0.915	0.53	0	6	H2AFJ
PDLIM3	0	0.888806	0.637	0.014	0	6	PDLIM3	0	0.888806	0.637	0.014	0	6	PDLIM3
SLC1A4	0	0.887837	0.756	0.123	0	6	SLC1A4	0	0.887837	0.756	0.123	0	6	SLC1A4
KCNAB2	0	0.88646	0.666	0.068	0	6	KCNAB2	0	0.88646	0.666	0.068	0	6	KCNAB2
STXBP6	0	0.876516	0.709	0.048	0	6	STXBP6	0	0.876516	0.709	0.048	0	6	STXBP6
DSTYK	0	0.875816	0.693	0.098	0	6	DSTYK	0	0.875816	0.693	0.098	0	6	DSTYK
AP1S21	0	0.875738	0.89	0.307	0	6	AP1S2	0	0.875738	0.89	0.307	0	6	AP1S2
LRPAP1	0	0.875518	0.917	0.501	0	6	LRPAP1	0	0.875518	0.917	0.501	0	6	LRPAP1
CHCHD6	0	0.868178	0.601	0.142	0	6	CHCHD6	0	0.868178	0.601	0.142	0	6	CHCHD6
LINC00518	0	0.852345	0.603	0.003	0	6	LINC00518	0	0.852345	0.603	0.003	0	6	LINC00518
PYURF	0	0.847761	0.948	0.673	0	6	PYURF	0	0.847761	0.948	0.673	0	6	PYURF
MFGE81	0	0.834399	0.752	0.17	0	6	MFGE8	0	0.834399	0.752	0.17	0	6	MFGE8
SEMA3C	0	0.831501	0.737	0.103	0	6	SEMA3C	0	0.831501	0.737	0.103	0	6	SEMA3C
TEX41	0	0.831389	0.596	0.003	0	6	TEX41	0	0.831389	0.596	0.003	0	6	TEX41
PLOD3	0	0.829435	0.713	0.099	0	6	PLOD3	0	0.829435	0.713	0.099	0	6	PLOD3
ATOX1	0	0.823968	0.954	0.692	0	6	ATOX1	1.87036e-287	0.823968	0.954	0.692	3.48204e-283	6	ATOX1
SPTBN1	0	0.816769	0.808	0.257	0	6	SPTBN1	0	0.816769	0.808	0.257	0	6	SPTBN1
ZNF106	0	0.816471	0.78	0.29	0	6	ZNF106	0	0.816471	0.78	0.29	0	6	ZNF106
MIA	0	0.812825	0.507	0.011	0	6	MIA	0	0.812825	0.507	0.011	0	6	MIA
PFN2	0	0.811053	0.675	0.094	0	6	PFN2	0	0.811053	0.675	0.094	0	6	PFN2
CTSF	0	0.803848	0.571	0.101	0	6	CTSF	0	0.803848	0.571	0.101	0	6	CTSF
QDPR	0	0.8036	0.768	0.235	0	6	QDPR	0	0.8036	0.768	0.235	0	6	QDPR
GOLM1	0	0.802987	0.642	0.026	0	6	GOLM1	0	0.802987	0.642	0.026	0	6	GOLM1
MXI1	0	0.80267	0.793	0.189	0	6	MXI1	0	0.80267	0.793	0.189	0	6	MXI1
SIGIRR	0	0.799017	0.726	0.121	0	6	SIGIRR	0	0.799017	0.726	0.121	0	6	SIGIRR
ENPP2	0	0.790148	0.647	0.072	0	6	ENPP2	0	0.790148	0.647	0.072	0	6	ENPP2
HEBP1	0	0.783242	0.715	0.24	0	6	HEBP1	0	0.783242	0.715	0.24	0	6	HEBP1
MSRB2	0	0.775528	0.741	0.228	0	6	MSRB2	0	0.775528	0.741	0.228	0	6	MSRB2
ILVBL	0	0.775142	0.777	0.224	0	6	ILVBL	0	0.775142	0.777	0.224	0	6	ILVBL
RHOBTB31	0	0.773567	0.641	0.056	0	6	RHOBTB3	0	0.773567	0.641	0.056	0	6	RHOBTB3
MBP	0	0.77196	0.814	0.348	0	6	MBP	1.80302e-283	0.77196	0.814	0.348	3.35668e-279	6	MBP
CLEC11A1	0	0.769647	0.771	0.19	0	6	CLEC11A	0	0.769647	0.771	0.19	0	6	CLEC11A
CELF22	0	0.766071	0.835	0.226	0	6	CELF2	0	0.766071	0.835	0.226	0	6	CELF2
TMEM1471	0	0.764407	0.927	0.623	0	6	TMEM147	1.65534e-278	0.764407	0.927	0.623	3.08175e-274	6	TMEM147
MGST31	0	0.763866	0.978	0.75	0	6	MGST3	0	0.763866	0.978	0.75	0	6	MGST3
UBL3	0	0.762271	0.743	0.228	0	6	UBL3	0	0.762271	0.743	0.228	0	6	UBL3
CYB5R31	0	0.761391	0.893	0.498	0	6	CYB5R3	1.52931e-283	0.761391	0.893	0.498	2.84711e-279	6	CYB5R3
AKAP12	0	0.758657	0.637	0.017	0	6	AKAP12	0	0.758657	0.637	0.017	0	6	AKAP12
AIF1L	0	0.756206	0.607	0.013	0	6	AIF1L	0	0.756206	0.607	0.013	0	6	AIF1L
MT1F	0	0.742808	0.664	0.096	0	6	MT1F	0	0.742808	0.664	0.096	0	6	MT1F
CYTH3	0	0.742085	0.638	0.054	0	6	CYTH3	0	0.742085	0.638	0.054	0	6	CYTH3
RETSAT	0	0.740763	0.668	0.135	0	6	RETSAT	0	0.740763	0.668	0.135	0	6	RETSAT
PTPLA	0	0.738649	0.668	0.068	0	6	PTPLA	0	0.738649	0.668	0.068	0	6	PTPLA
PLAT	0	0.738561	0.501	0.049	0	6	PLAT	0	0.738561	0.501	0.049	0	6	PLAT
HSPB2	0	0.736808	0.563	0.011	0	6	HSPB2	0	0.736808	0.563	0.011	0	6	HSPB2
SCARB1	0	0.729854	0.62	0.055	0	6	SCARB1	0	0.729854	0.62	0.055	0	6	SCARB1
CALU1	0	0.723458	0.785	0.267	0	6	CALU	0	0.723458	0.785	0.267	0	6	CALU
COPS81	0	0.720895	0.79	0.331	0	6	COPS8	3.52629e-293	0.720895	0.79	0.331	6.5649e-289	6	COPS8
ZEB21	0	0.718971	0.747	0.16	0	6	ZEB2	0	0.718971	0.747	0.16	0	6	ZEB2
PTTG1IP	0	0.717261	0.832	0.366	0	6	PTTG1IP	1.49308e-274	0.717261	0.832	0.366	2.77967e-270	6	PTTG1IP
PEPD	0	0.711432	0.762	0.267	0	6	PEPD	0	0.711432	0.762	0.267	0	6	PEPD
SPECC1	0	0.70983	0.665	0.114	0	6	SPECC1	0	0.70983	0.665	0.114	0	6	SPECC1
LSAMP	0	0.700248	0.571	0.016	0	6	LSAMP	0	0.700248	0.571	0.016	0	6	LSAMP
PON2	0	0.699586	0.768	0.267	0	6	PON2	0	0.699586	0.768	0.267	0	6	PON2
TRPV2	0	0.693948	0.654	0.106	0	6	TRPV2	0	0.693948	0.654	0.106	0	6	TRPV2
C1orf85	0	0.690984	0.694	0.136	0	6	C1orf85	0	0.690984	0.694	0.136	0	6	C1orf85
TRIB2	0	0.689851	0.633	0.057	0	6	TRIB2	0	0.689851	0.633	0.057	0	6	TRIB2
DNAJC1	0	0.68845	0.689	0.244	0	6	DNAJC1	5.21126e-274	0.68845	0.689	0.244	9.7018e-270	6	DNAJC1
SCARB21	0	0.681145	0.759	0.263	0	6	SCARB2	0	0.681145	0.759	0.263	0	6	SCARB2
CDK2	0	0.670172	0.641	0.115	0	6	CDK2	0	0.670172	0.641	0.115	0	6	CDK2
FBXO32	0	0.670045	0.623	0.083	0	6	FBXO32	0	0.670045	0.623	0.083	0	6	FBXO32
ITGB1BP1	0	0.666154	0.809	0.342	0	6	ITGB1BP1	1.08986e-279	0.666154	0.809	0.342	2.02899e-275	6	ITGB1BP1
LZTS1	0	0.666004	0.561	0.026	0	6	LZTS1	0	0.666004	0.561	0.026	0	6	LZTS1
HEXA	0	0.664951	0.76	0.267	0	6	HEXA	3.82339e-306	0.664951	0.76	0.267	7.11801e-302	6	HEXA
TRIM2	0	0.657102	0.577	0.033	0	6	TRIM2	0	0.657102	0.577	0.033	0	6	TRIM2
PAX3	0	0.650248	0.554	0.002	0	6	PAX3	0	0.650248	0.554	0.002	0	6	PAX3
RAB27A	0	0.642552	0.62	0.141	0	6	RAB27A	0	0.642552	0.62	0.141	0	6	RAB27A
FYN1	0	0.640981	0.638	0.073	0	6	FYN	0	0.640981	0.638	0.073	0	6	FYN
2020-09-04	0	0.640907	0.537	0.019	0	6	2020-09-04	0	0.640907	0.537	0.019	0	6	2020-09-04
CLCN7	0	0.636172	0.627	0.116	0	6	CLCN7	0	0.636172	0.627	0.116	0	6	CLCN7
QPRT	0	0.634678	0.589	0.059	0	6	QPRT	0	0.634678	0.589	0.059	0	6	QPRT
BCHE	0	0.630878	0.563	0.042	0	6	BCHE	0	0.630878	0.563	0.042	0	6	BCHE
SOX10	0	0.629764	0.529	0.001	0	6	SOX10	0	0.629764	0.529	0.001	0	6	SOX10
CNPY2	0	0.626033	0.827	0.447	0	6	CNPY2	2.77028e-220	0.626033	0.827	0.447	5.15742e-216	6	CNPY2
SGCD	0	0.625983	0.518	0.004	0	6	SGCD	0	0.625983	0.518	0.004	0	6	SGCD
FN11	0	0.62588	0.513	0.043	0	6	FN1	0	0.62588	0.513	0.043	0	6	FN1
IFT81	0	0.62521	0.583	0.057	0	6	IFT81	0	0.62521	0.583	0.057	0	6	IFT81
FARP11	0	0.618743	0.602	0.046	0	6	FARP1	0	0.618743	0.602	0.046	0	6	FARP1
TPCN2	0	0.613872	0.524	0.048	0	6	TPCN2	0	0.613872	0.524	0.048	0	6	TPCN2
MTURN	0	0.606067	0.572	0.088	0	6	MTURN	0	0.606067	0.572	0.088	0	6	MTURN
ADCY2	0	0.60274	0.528	0.019	0	6	ADCY2	0	0.60274	0.528	0.019	0	6	ADCY2
MTHFD1L	0	0.600562	0.609	0.108	0	6	MTHFD1L	0	0.600562	0.609	0.108	0	6	MTHFD1L
C1orf198	0	0.600386	0.589	0.085	0	6	C1orf198	0	0.600386	0.589	0.085	0	6	C1orf198
ETS11	0	0.597201	0.615	0.089	0	6	ETS1	0	0.597201	0.615	0.089	0	6	ETS1
TGFB1I11	0	0.592189	0.557	0.053	0	6	TGFB1I1	0	0.592189	0.557	0.053	0	6	TGFB1I1
RENBP	0	0.588676	0.601	0.083	0	6	RENBP	0	0.588676	0.601	0.083	0	6	RENBP
OSBPL1A	0	0.573746	0.617	0.144	0	6	OSBPL1A	0	0.573746	0.617	0.144	0	6	OSBPL1A
PSEN2	0	0.573538	0.565	0.052	0	6	PSEN2	0	0.573538	0.565	0.052	0	6	PSEN2
TLE1	0	0.571535	0.618	0.124	0	6	TLE1	0	0.571535	0.618	0.124	0	6	TLE1
CCDC801	0	0.571302	0.543	0.043	0	6	CCDC80	0	0.571302	0.543	0.043	0	6	CCDC80
GCNT2	0	0.568297	0.519	0.042	0	6	GCNT2	0	0.568297	0.519	0.042	0	6	GCNT2
SLC35B2	0	0.56419	0.622	0.161	0	6	SLC35B2	0	0.56419	0.622	0.161	0	6	SLC35B2
CYP27A1	0	0.56216	0.539	0.055	0	6	CYP27A1	0	0.56216	0.539	0.055	0	6	CYP27A1
SRPX1	0	0.555874	0.544	0.047	0	6	SRPX	0	0.555874	0.544	0.047	0	6	SRPX
AGPAT6	0	0.541769	0.562	0.132	0	6	AGPAT6	0	0.541769	0.562	0.132	0	6	AGPAT6
DNAJC13	0	0.536265	0.572	0.119	0	6	DNAJC13	0	0.536265	0.572	0.119	0	6	DNAJC13
FSTL11	0	0.519551	0.543	0.045	0	6	FSTL1	0	0.519551	0.543	0.045	0	6	FSTL1
GPX81	0	0.516651	0.515	0.05	0	6	GPX8	0	0.516651	0.515	0.05	0	6	GPX8
METTL91	1.12240203e-316	0.629786	0.82	0.459	2.089575859355e-312	6	METTL9	1.28295e-201	0.629786	0.82	0.459	2.38846e-197	6	METTL9
TFPT	5.41695224e-316	0.622235	0.682	0.203	1.0084739990413e-311	6	TFPT	0	0.622235	0.682	0.203	0	6	TFPT
FBXO7	3.059400253e-315	0.5997	0.763	0.334	5.6956854512294e-311	6	FBXO7	1.719e-233	0.5997	0.763	0.334	3.20027e-229	6	FBXO7
SOX41	9.469918045e-315	0.906445	0.84	0.286	1.76301464248956e-310	6	SOX4	0	0.906445	0.84	0.286	0	6	SOX4
OSBPL9	1.50212364463e-313	0.525418	0.573	0.15	0	6	OSBPL9	1.49823e-292	0.525418	0.573	0.15	2.78926e-288	6	OSBPL9
WDFY1	3.078392412247e-312	0.508389	0.555	0.108	5.73104e-308	6	WDFY1	0	0.508389	0.555	0.108	0	6	WDFY1
RAB5C	8.68534685711e-312	0.636685	0.878	0.59	1.61695e-307	6	RAB5C	1.27316e-201	0.636685	0.878	0.59	2.37023e-197	6	RAB5C
ZMAT3	2.031303273825e-311	0.553784	0.561	0.137	3.78168e-307	6	ZMAT3	0	0.553784	0.561	0.137	0	6	ZMAT3
TSPAN42	1.44643641861593e-310	0.686307	0.735	0.215	2.69283e-306	6	TSPAN4	0	0.686307	0.735	0.215	0	6	TSPAN4
REXO22	0	0.673294	0.887	0.509	4.05374e-305	6	REXO2	5.32679e-234	0.673294	0.887	0.509	9.91689e-230	6	REXO2
DOCK5	2.47964e-306	0.611976	0.584	0.11	4.61635e-302	6	DOCK5	0	0.611976	0.584	0.11	0	6	DOCK5
ANKRD281	7.64912e-305	0.634396	0.642	0.139	1.42404e-300	6	ANKRD28	0	0.634396	0.642	0.139	0	6	ANKRD28
RHOQ	2.87229e-299	0.529137	0.57	0.103	5.34734e-295	6	RHOQ	0	0.529137	0.57	0.103	0	6	RHOQ
CTSD	1.16228e-298	0.741123	0.974	0.705	2.16382e-294	6	CTSD	1.5663e-264	0.741123	0.974	0.705	2.91598e-260	6	CTSD
NDN1	2.5827e-296	0.530189	0.516	0.066	4.80822e-292	6	NDN	0	0.530189	0.516	0.066	0	6	NDN
C6orf1	6.84207e-295	0.572659	0.704	0.274	1.27379e-290	6	C6orf1	1.02997e-235	0.572659	0.704	0.274	1.91749e-231	6	C6orf1
PARVA	1.4153e-287	0.507674	0.548	0.112	2.63486e-283	6	PARVA	0	0.507674	0.548	0.112	0	6	PARVA
TSC22D11	2.51055e-283	0.842802	0.861	0.35	4.6739e-279	6	TSC22D1	6.4002e-302	0.842802	0.861	0.35	1.19153e-297	6	TSC22D1
CTSA1	1.89914e-281	0.665645	0.817	0.386	3.53563e-277	6	CTSA	5.93603e-236	0.665645	0.817	0.386	1.10511e-231	6	CTSA
HES41	2.05996e-280	0.718013	0.733	0.207	3.83503e-276	6	HES4	0	0.718013	0.733	0.207	0	6	HES4
CUTA	2.14346e-280	0.576938	0.939	0.704	3.99049e-276	6	CUTA	1.31864e-208	0.576938	0.939	0.704	2.45491e-204	6	CUTA
EPS15	2.37629e-279	0.550411	0.663	0.231	4.42393e-275	6	EPS15	7.97559e-242	0.550411	0.663	0.231	1.48482e-237	6	EPS15
TCEAL81	2.96692e-279	0.606305	0.793	0.359	5.52352e-275	6	TCEAL8	2.01598e-231	0.606305	0.793	0.359	3.75315e-227	6	TCEAL8
PTPLAD11	3.61902e-276	0.615079	0.738	0.287	6.73753e-272	6	PTPLAD1	4.38523e-250	0.615079	0.738	0.287	8.16398e-246	6	PTPLAD1
IFI61	4.73447e-276	1.20174	0.899	0.489	8.81417e-272	6	IFI6	8.33435e-242	1.20174	0.899	0.489	1.55161e-237	6	IFI6
ST6GALNAC2	2.40194e-275	0.55386	0.593	0.172	4.47169e-271	6	ST6GALNAC2	8.28783e-269	0.55386	0.593	0.172	1.54294e-264	6	ST6GALNAC2
AGPAT21	2.30358e-272	0.598538	0.787	0.39	4.28858e-268	6	AGPAT2	4.13832e-205	0.598538	0.787	0.39	7.70431e-201	6	AGPAT2
RABAC11	5.14176e-272	0.609809	0.915	0.6	9.57242e-268	6	RABAC1	1.05958e-221	0.609809	0.915	0.6	1.97262e-217	6	RABAC1
PIP4K2A	7.61784e-272	0.564922	0.581	0.133	1.41821e-267	6	PIP4K2A	0	0.564922	0.581	0.133	0	6	PIP4K2A
IRS2	5.24874e-271	0.594267	0.599	0.137	9.77157e-267	6	IRS2	0	0.594267	0.599	0.137	0	6	IRS2
DERA	4.49265e-269	0.530436	0.688	0.287	8.36397e-265	6	DERA	2.03378e-200	0.530436	0.688	0.287	3.78629e-196	6	DERA
LINC00998	7.5378e-268	0.608618	0.8	0.419	1.40331e-263	6	LINC00998	4.27371e-199	0.608618	0.8	0.419	7.95637e-195	6	LINC00998
ST3GAL5	3.21088e-267	0.555805	0.53	0.092	5.9777e-263	6	ST3GAL5	0	0.555805	0.53	0.092	0	6	ST3GAL5
EMC10	8.32679e-267	0.529797	0.7	0.329	1.5502e-262	6	EMC10	9.17577e-177	0.529797	0.7	0.329	1.70825e-172	6	EMC10
TMED10	1.43515e-266	0.568064	0.945	0.736	2.67182e-262	6	TMED10	2.63987e-193	0.568064	0.945	0.736	4.91465e-189	6	TMED10
DPP7	1.78865e-261	0.603729	0.818	0.486	3.32992e-257	6	DPP7	4.13163e-170	0.603729	0.818	0.486	7.69185e-166	6	DPP7
RHOC2	1.27105e-260	0.660922	0.913	0.59	2.36632e-256	6	RHOC	6.15988e-214	0.660922	0.913	0.59	1.14678e-209	6	RHOC
NME41	8.10475e-260	0.623074	0.732	0.298	1.50886e-255	6	NME4	1.34803e-233	0.623074	0.732	0.298	2.50963e-229	6	NME4
GNG2	8.69169e-259	0.50029	0.515	0.075	1.61813e-254	6	GNG2	0	0.50029	0.515	0.075	0	6	GNG2
CHPT1	3.77496e-258	0.551635	0.646	0.172	7.02785e-254	6	CHPT1	0	0.551635	0.646	0.172	0	6	CHPT1
CAV12	4.57198e-258	0.676967	0.93	0.403	8.51165e-254	6	CAV1	8.32276e-279	0.676967	0.93	0.403	1.54945e-274	6	CAV1
HPCAL1	1.24292e-257	0.52275	0.628	0.183	2.31394e-253	6	HPCAL1	1.13347e-280	0.52275	0.628	0.183	2.11018e-276	6	HPCAL1
PPFIBP11	1.12148e-254	0.574922	0.633	0.184	2.08787e-250	6	PPFIBP1	8.44273e-290	0.574922	0.633	0.184	1.57178e-285	6	PPFIBP1
C1orf1222	4.77092e-253	0.559147	0.712	0.346	8.88203e-249	6	C1orf122	3.8091e-179	0.559147	0.712	0.346	7.0914e-175	6	C1orf122
FIS1	3.11588e-248	0.549017	0.89	0.631	5.80083e-244	6	FIS1	1.06132e-165	0.549017	0.89	0.631	1.97587e-161	6	FIS1
MT1M	9.3666e-248	0.559244	0.563	0.102	1.74378e-243	6	MT1M	0	0.559244	0.563	0.102	0	6	MT1M
ATP6V1B2	2.31545e-247	0.626736	0.836	0.4	4.31068e-243	6	ATP6V1B2	2.36123e-230	0.626736	0.836	0.4	4.3959e-226	6	ATP6V1B2
MAD1L11	4.05891e-247	0.521685	0.613	0.191	7.55648e-243	6	MAD1L1	5.84e-251	0.521685	0.613	0.191	1.08723e-246	6	MAD1L1
CPEB2	8.50527e-243	0.507464	0.565	0.14	1.58343e-238	6	CPEB2	1.55312e-300	0.507464	0.565	0.14	2.89144e-296	6	CPEB2
FAM89A1	1.68223e-240	0.539366	0.561	0.172	3.1318e-236	6	FAM89A	1.40374e-227	0.539366	0.561	0.172	2.61335e-223	6	FAM89A
TMEM230	6.9115e-240	0.573821	0.818	0.459	1.28671e-235	6	TMEM230	1.11619e-186	0.573821	0.818	0.459	2.07802e-182	6	TMEM230
OPTN1	2.33498e-238	0.600515	0.769	0.348	4.34703e-234	6	OPTN	1.15153e-212	0.600515	0.769	0.348	2.1438e-208	6	OPTN
MAP1B	8.31908e-237	0.542731	0.555	0.105	1.54876e-232	6	MAP1B	0	0.542731	0.555	0.105	0	6	MAP1B
DNAJC152	4.22741e-235	0.588616	0.823	0.512	7.87017e-231	6	DNAJC15	1.5149e-163	0.588616	0.823	0.512	2.82029e-159	6	DNAJC15
HNMT	6.97478e-230	0.573925	0.647	0.178	1.29849e-225	6	HNMT	2.30909e-304	0.573925	0.647	0.178	4.29884e-300	6	HNMT
CLIC41	2.6189e-229	0.536609	0.66	0.214	4.87561e-225	6	CLIC4	9.17824e-256	0.536609	0.66	0.214	1.70871e-251	6	CLIC4
SPATS2L1	7.70816e-229	0.578023	0.758	0.327	1.43503e-224	6	SPATS2L	9.31641e-221	0.578023	0.758	0.327	1.73444e-216	6	SPATS2L
CRNDE	1.48179e-228	0.599588	0.747	0.282	2.75864e-224	6	CRNDE	5.76604e-248	0.599588	0.747	0.282	1.07346e-243	6	CRNDE
PHACTR1	8.96956e-228	0.619008	0.572	0.117	1.66986e-223	6	PHACTR1	0	0.619008	0.572	0.117	0	6	PHACTR1
SCD	3.1604e-226	0.539251	0.541	0.106	5.88371e-222	6	SCD	0	0.539251	0.541	0.106	0	6	SCD
ITM2A1	4.70844e-225	0.760882	0.55	0.13	8.7657e-221	6	ITM2A	0	0.760882	0.55	0.13	0	6	ITM2A
DYNC1LI2	1.73213e-224	0.509343	0.682	0.304	3.22471e-220	6	DYNC1LI2	5.59631e-178	0.509343	0.682	0.304	1.04187e-173	6	DYNC1LI2
GNPTAB	2.71209e-224	0.501433	0.605	0.195	5.0491e-220	6	GNPTAB	7.70151e-233	0.501433	0.605	0.195	1.43379e-228	6	GNPTAB
ANXA62	7.33507e-221	0.509423	0.655	0.169	1.36557e-216	6	ANXA6	0	0.509423	0.655	0.169	0	6	ANXA6
ITPR2	2.54951e-217	0.522429	0.575	0.226	4.74643e-213	6	ITPR2	1.26869e-161	0.522429	0.575	0.226	2.36192e-157	6	ITPR2
SPRED1	2.08783e-216	0.514382	0.556	0.138	3.88691e-212	6	SPRED1	1.80045e-294	0.514382	0.556	0.138	3.3519e-290	6	SPRED1
CDH32	2.05129e-213	0.598451	0.694	0.253	3.81889e-209	6	CDH3	9.16224e-237	0.598451	0.694	0.253	1.70573e-232	6	CDH3
HDDC2	4.19884e-206	0.507486	0.721	0.371	7.81697e-202	6	HDDC2	6.55633e-156	0.507486	0.721	0.371	1.22059e-151	6	HDDC2
SPTSSA1	1.35033e-203	0.585669	0.907	0.639	2.51391e-199	6	SPTSSA	2.99435e-163	0.585669	0.907	0.639	5.57458e-159	6	SPTSSA
FAM210B	8.31736e-199	0.518264	0.623	0.279	1.54844e-194	6	FAM210B	6.88712e-149	0.518264	0.623	0.279	1.28217e-144	6	FAM210B
CTSB1	6.02899e-196	0.579604	0.969	0.695	1.12242e-191	6	CTSB	1.40878e-217	0.579604	0.969	0.695	2.62273e-213	6	CTSB
NGFRAP12	9.13916e-195	0.596056	0.79	0.351	1.70144e-190	6	NGFRAP1	9.12042e-210	0.596056	0.79	0.351	1.69795e-205	6	NGFRAP1
MAP41	7.86095e-192	0.515395	0.789	0.448	1.46347e-187	6	MAP4	6.12753e-155	0.515395	0.789	0.448	1.14076e-150	6	MAP4
DHRS71	2.11742e-191	0.534307	0.811	0.409	3.94201e-187	6	DHRS7	5.86517e-187	0.534307	0.811	0.409	1.09192e-182	6	DHRS7
NUCB11	2.17708e-191	0.509643	0.808	0.468	4.05307e-187	6	NUCB1	1.74584e-156	0.509643	0.808	0.468	3.25023e-152	6	NUCB1
PARP1	2.73151e-191	0.542169	0.723	0.394	5.08525e-187	6	PARP1	2.41488e-140	0.542169	0.723	0.394	4.49578e-136	6	PARP1
ILK1	1.70415e-189	0.500101	0.723	0.325	3.17262e-185	6	ILK	1.91227e-181	0.500101	0.723	0.325	3.56008e-177	6	ILK
TPP11	1.94141e-188	0.551542	0.686	0.284	3.61433e-184	6	TPP1	1.06908e-190	0.551542	0.686	0.284	1.9903e-186	6	TPP1
IFIT31	4.185e-179	0.621809	0.636	0.192	7.79122e-175	6	IFIT3	4.53016e-248	0.621809	0.636	0.192	8.43381e-244	6	IFIT3
PRDX43	2.05386e-176	0.518502	0.785	0.442	3.82368e-172	6	PRDX4	6.66158e-158	0.518502	0.785	0.442	1.24019e-153	6	PRDX4
HIBCH	1.87986e-168	0.575373	0.648	0.353	3.49974e-164	6	HIBCH	3.91995e-108	0.575373	0.648	0.353	7.29776e-104	6	HIBCH
BST22	4.78735e-168	0.88832	0.652	0.365	8.91261e-164	6	BST2	6.09289e-113	0.88832	0.652	0.365	1.13431e-108	6	BST2
GAS6	1.3093e-167	0.564788	0.739	0.419	2.43752e-163	6	GAS6	1.10281e-127	0.564788	0.739	0.419	2.0531e-123	6	GAS6
IFI44L1	5.03815e-167	0.703274	0.538	0.169	9.37952e-163	6	IFI44L	4.30467e-201	0.703274	0.538	0.169	8.014e-197	6	IFI44L
PLTP	3.29815e-166	0.512255	0.726	0.305	6.14017e-162	6	PLTP	4.69559e-192	0.512255	0.726	0.305	8.74178e-188	6	PLTP
WBP52	5.08469e-165	0.505716	0.705	0.279	9.46616e-161	6	WBP5	2.6599e-198	0.505716	0.705	0.279	4.95194e-194	6	WBP5
SLC39A61	1.39615e-159	0.527433	0.831	0.432	2.59922e-155	6	SLC39A6	2.86832e-172	0.527433	0.831	0.432	5.33995e-168	6	SLC39A6
CD81	1.82588e-151	0.503755	0.752	0.371	3.39925e-147	6	CD81	1.80355e-160	0.503755	0.752	0.371	3.35768e-156	6	CD81
ARL6IP52	9.14223e-146	0.501233	0.92	0.629	1.70201e-141	6	ARL6IP5	7.9141e-150	0.501233	0.92	0.629	1.47337e-145	6	ARL6IP5
CD1512	1.53174e-144	0.516038	0.797	0.469	2.85164e-140	6	CD151	1.68171e-132	0.516038	0.797	0.469	3.13084e-128	6	CD151
RAB382	5.05791e-140	0.502477	0.714	0.352	9.41632e-136	6	RAB38	2.15441e-141	0.502477	0.714	0.352	4.01086e-137	6	RAB38
CTNNB1	1.11549e-139	0.619843	0.754	0.436	2.07671e-135	6	CTNNB1	1.04761e-118	0.619843	0.754	0.436	1.95033e-114	6	CTNNB1
WARS1	1.92233e-136	0.630196	0.649	0.276	3.57881e-132	6	WARS	6.26375e-165	0.630196	0.649	0.276	1.16612e-160	6	WARS
IRF8	0	2.25503	0.992	0.125	0	7	IRF8	0	2.25503	0.992	0.125	0	7	IRF8
CPVL1	0	2.23118	0.997	0.26	0	7	CPVL	0	2.23118	0.997	0.26	0	7	CPVL
C1orf54	0	2.03297	0.977	0.12	0	7	C1orf54	0	2.03297	0.977	0.12	0	7	C1orf54
RGCC	0	1.70629	0.899	0.206	0	7	RGCC	0	1.70629	0.899	0.206	0	7	RGCC
HLA-DPA11	0	1.63764	1	0.589	0	7	HLA-DPA1	0	1.63764	1	0.589	0	7	HLA-DPA1
LYZ1	0	1.62739	0.998	0.391	0	7	LYZ	0	1.62739	0.998	0.391	0	7	LYZ
NAAA	0	1.6046	0.947	0.222	0	7	NAAA	0	1.6046	0.947	0.222	0	7	NAAA
HLA-DPB11	0	1.58349	1	0.625	0	7	HLA-DPB1	0	1.58349	1	0.625	0	7	HLA-DPB1
PPT11	0	1.54871	0.987	0.459	0	7	PPT1	0	1.54871	0.987	0.459	0	7	PPT1
CLEC9A	0	1.50693	0.89	0.003	0	7	CLEC9A	0	1.50693	0.89	0.003	0	7	CLEC9A
LGALS2	0	1.4941	0.858	0.152	0	7	LGALS2	0	1.4941	0.858	0.152	0	7	LGALS2
IDO1	0	1.44624	0.828	0.111	0	7	IDO1	0	1.44624	0.828	0.111	0	7	IDO1
ID22	0	1.43536	0.984	0.563	0	7	ID2	5.34371e-288	1.43536	0.984	0.563	9.94839e-284	7	ID2
LSP12	0	1.38773	0.998	0.533	0	7	LSP1	0	1.38773	0.998	0.533	0	7	LSP1
DNASE1L31	0	1.36766	0.752	0.13	0	7	DNASE1L3	0	1.36766	0.752	0.13	0	7	DNASE1L3
COTL12	0	1.33463	0.994	0.414	0	7	COTL1	0	1.33463	0.994	0.414	0	7	COTL1
PLEK1	0	1.31527	0.907	0.219	0	7	PLEK	0	1.31527	0.907	0.219	0	7	PLEK
CPNE3	0	1.26425	0.947	0.489	0	7	CPNE3	0	1.26425	0.947	0.489	0	7	CPNE3
LCP12	0	1.25416	0.987	0.334	0	7	LCP1	0	1.25416	0.987	0.334	0	7	LCP1
UCP22	0	1.22249	0.953	0.269	0	7	UCP2	0	1.22249	0.953	0.269	0	7	UCP2
BASP11	0	1.19069	0.936	0.284	0	7	BASP1	0	1.19069	0.936	0.284	0	7	BASP1
FNBP12	0	1.16408	0.952	0.313	0	7	FNBP1	0	1.16408	0.952	0.313	0	7	FNBP1
C1orf1621	0	1.13926	0.9	0.221	0	7	C1orf162	0	1.13926	0.9	0.221	0	7	C1orf162
BID1	0	1.12252	0.839	0.287	0	7	BID	1.21981e-291	1.12252	0.839	0.287	2.27092e-287	7	BID
RGS101	0	1.10824	0.976	0.398	0	7	RGS10	0	1.10824	0.976	0.398	0	7	RGS10
LIMD22	0	1.09122	0.871	0.195	0	7	LIMD2	0	1.09122	0.871	0.195	0	7	LIMD2
WDFY4	0	1.05752	0.792	0.031	0	7	WDFY4	0	1.05752	0.792	0.031	0	7	WDFY4
PTPRE	0	1.03123	0.894	0.283	0	7	PTPRE	0	1.03123	0.894	0.283	0	7	PTPRE
TAP11	0	1.01052	0.953	0.576	0	7	TAP1	6.72616e-228	1.01052	0.953	0.576	1.25221e-223	7	TAP1
CADM1	0	0.854617	0.736	0.124	0	7	CADM1	0	0.854617	0.736	0.124	0	7	CADM1
SLAMF7	0	0.84317	0.691	0.064	0	7	SLAMF7	0	0.84317	0.691	0.064	0	7	SLAMF7
KIAA1598	0	0.838097	0.812	0.248	0	7	KIAA1598	0	0.838097	0.812	0.248	0	7	KIAA1598
KIAA0226L	0	0.779152	0.652	0.023	0	7	KIAA0226L	0	0.779152	0.652	0.023	0	7	KIAA0226L
XCR1	0	0.760061	0.557	0.002	0	7	XCR1	0	0.760061	0.557	0.002	0	7	XCR1
BATF3	0	0.730479	0.586	0.038	0	7	BATF3	0	0.730479	0.586	0.038	0	7	BATF3
VAC14	0	0.687862	0.702	0.146	0	7	VAC14	0	0.687862	0.702	0.146	0	7	VAC14
RAB322	2.754755e-317	1.08296	0.879	0.266	5.1285272059e-313	7	RAB32	0	1.08296	0.879	0.266	0	7	RAB32
MPEG1	1.088069265e-315	0.893577	0.738	0.112	2.0256585507385e-311	7	MPEG1	0	0.893577	0.738	0.112	0	7	MPEG1
HLA-DQB11	0	1.30039	1	0.567	1.00709e-304	7	HLA-DQB1	5.90585e-256	1.30039	1	0.567	1.09949e-251	7	HLA-DQB1
CD481	5.84903e-308	0.95424	0.816	0.165	1.08891e-303	7	CD48	0	0.95424	0.816	0.165	0	7	CD48
VMO1	1.14141e-306	1.36144	0.665	0.098	2.12496e-302	7	VMO1	0	1.36144	0.665	0.098	0	7	VMO1
HLA-DRB51	5.98183e-304	1.52711	0.976	0.444	1.11364e-299	7	HLA-DRB5	3.09726e-290	1.52711	0.976	0.444	5.76616e-286	7	HLA-DRB5
ATG31	8.90849e-303	0.780788	0.902	0.537	1.65849e-298	7	ATG3	3.16945e-188	0.780788	0.902	0.537	5.90057e-184	7	ATG3
SERPINB12	1.30003e-300	1.25407	0.905	0.555	2.42027e-296	7	SERPINB1	4.72587e-173	1.25407	0.905	0.555	8.79815e-169	7	SERPINB1
HLA-DRA1	2.08187e-297	1.31389	1	0.798	3.87581e-293	7	HLA-DRA	1.29934e-235	1.31389	1	0.798	2.41898e-231	7	HLA-DRA
HLA-DOB	6.32076e-288	0.759196	0.683	0.101	1.17674e-283	7	HLA-DOB	0	0.759196	0.683	0.101	0	7	HLA-DOB
HLA-DQA11	4.94575e-283	1.13362	1	0.438	9.20751e-279	7	HLA-DQA1	2.12171e-249	1.13362	1	0.438	3.95e-245	7	HLA-DQA1
HLA-DRB11	2.54309e-280	1.26498	1	0.634	4.73447e-276	7	HLA-DRB1	2.55402e-232	1.26498	1	0.634	4.75483e-228	7	HLA-DRB1
HLA-DMA1	6.8861e-275	0.97999	0.998	0.422	1.28199e-270	7	HLA-DMA	1.82361e-250	0.97999	0.998	0.422	3.39501e-246	7	HLA-DMA
HLA-DMB1	1.41745e-268	0.802137	0.971	0.314	2.63887e-264	7	HLA-DMB	5.55879e-255	0.802137	0.971	0.314	1.03488e-250	7	HLA-DMB
FUCA1	1.54729e-268	0.624871	0.527	0.111	2.88058e-264	7	FUCA1	1.22314e-249	0.624871	0.527	0.111	2.27712e-245	7	FUCA1
SERPINB91	1.75874e-262	1.1307	0.824	0.202	3.27425e-258	7	SERPINB9	0	1.1307	0.824	0.202	0	7	SERPINB9
1962-09-01	1.31719e-260	0.792021	0.823	0.226	2.45222e-256	7	2020-09-06	0	0.792021	0.823	0.226	0	7	2020-09-06
VIM4	8.53619e-258	1.10999	1	0.552	1.58918e-253	7	VIM	7.14e-236	1.10999	1	0.552	1.32925e-231	7	VIM
ARPC1B3	9.00523e-256	0.863359	0.998	0.733	1.6765e-251	7	ARPC1B	1.40498e-218	0.863359	0.998	0.733	2.61565e-214	7	ARPC1B
CORO1A2	1.55119e-255	0.964396	0.947	0.314	2.88785e-251	7	CORO1A	1.58709e-279	0.964396	0.947	0.314	2.95468e-275	7	CORO1A
ITGB21	1.10876e-254	0.858007	0.932	0.286	2.06418e-250	7	ITGB2	1.0244e-282	0.858007	0.932	0.286	1.90713e-278	7	ITGB2
SLAMF8	8.74712e-252	0.769342	0.684	0.122	1.62845e-247	7	SLAMF8	0	0.769342	0.684	0.122	0	7	SLAMF8
SPI11	3.58354e-250	0.755373	0.942	0.3	6.67148e-246	7	SPI1	3.16184e-234	0.755373	0.942	0.3	5.8864e-230	7	SPI1
RAB11FIP1	8.45002e-250	0.741636	0.733	0.192	1.57314e-245	7	RAB11FIP1	1.98e-293	0.741636	0.733	0.192	3.68617e-289	7	RAB11FIP1
GYPC2	1.54481e-244	0.684575	0.668	0.102	2.87597e-240	7	GYPC	0	0.684575	0.668	0.102	0	7	GYPC
LRRK2	3.69922e-244	0.555367	0.512	0.065	6.88684e-240	7	LRRK2	0	0.555367	0.512	0.065	0	7	LRRK2
CLIC2	1.83928e-242	0.692108	0.718	0.137	3.42419e-238	7	CLIC2	0	0.692108	0.718	0.137	0	7	CLIC2
G3BP2	1.8566e-242	0.689257	0.784	0.371	3.45643e-238	7	G3BP2	2.46663e-161	0.689257	0.784	0.371	4.59212e-157	7	G3BP2
FGL21	1.21734e-241	0.940576	0.879	0.252	2.26633e-237	7	FGL2	1.36415e-295	0.940576	0.879	0.252	2.53963e-291	7	FGL2
P2RY6	1.16557e-234	0.575203	0.527	0.056	2.16995e-230	7	P2RY6	0	0.575203	0.527	0.056	0	7	P2RY6
ICAM31	3.47293e-234	0.715702	0.762	0.168	6.46555e-230	7	ICAM3	0	0.715702	0.762	0.168	0	7	ICAM3
PTPRC2	3.00799e-226	0.612855	0.928	0.32	5.59998e-222	7	PTPRC	8.9837e-189	0.612855	0.928	0.32	1.67249e-184	7	PTPRC
CXCL161	1.6357e-223	0.869519	0.857	0.36	3.04519e-219	7	CXCL16	1.57428e-217	0.869519	0.857	0.36	2.93084e-213	7	CXCL16
CAMK2D	9.66746e-215	0.513197	0.562	0.114	1.79979e-210	7	CAMK2D	6.20194e-277	0.513197	0.562	0.114	1.15462e-272	7	CAMK2D
LAG3	8.32257e-214	0.590501	0.551	0.07	1.54941e-209	7	LAG3	0	0.590501	0.551	0.07	0	7	LAG3
CTSZ2	2.0585e-212	0.815002	0.894	0.32	3.83231e-208	7	CTSZ	3.20509e-244	0.815002	0.894	0.32	5.96692e-240	7	CTSZ
PARVG	9.06475e-210	0.609897	0.641	0.128	1.68758e-205	7	PARVG	0	0.609897	0.641	0.128	0	7	PARVG
FAM49B1	2.60658e-206	0.736668	0.939	0.511	4.85266e-202	7	FAM49B	1.45768e-191	0.736668	0.939	0.511	2.71375e-187	7	FAM49B
HCLS12	2.74427e-205	0.698964	0.829	0.246	5.10901e-201	7	HCLS1	1.00481e-253	0.698964	0.829	0.246	1.87066e-249	7	HCLS1
LGALS91	3.38181e-200	0.689384	0.821	0.245	6.29591e-196	7	LGALS9	1.15931e-249	0.689384	0.821	0.245	2.15829e-245	7	LGALS9
DUSP42	4.03745e-200	0.986549	0.631	0.123	7.51652e-196	7	DUSP4	0	0.986549	0.631	0.123	0	7	DUSP4
ASAP1	9.93844e-200	0.589225	0.702	0.221	1.85024e-195	7	ASAP1	7.82766e-216	0.589225	0.702	0.221	1.45727e-211	7	ASAP1
CLEC7A1	5.96928e-199	0.710629	0.863	0.302	1.1113e-194	7	CLEC7A	2.92461e-231	0.710629	0.863	0.302	5.44474e-227	7	CLEC7A
SAMHD11	4.27068e-193	0.739029	0.8	0.266	7.95073e-189	7	SAMHD1	4.05648e-229	0.739029	0.8	0.266	7.55195e-225	7	SAMHD1
SELPLG	2.06515e-190	0.557178	0.559	0.1	3.84469e-186	7	SELPLG	0	0.557178	0.559	0.1	0	7	SELPLG
DENND1B	5.67905e-190	0.60376	0.66	0.185	1.05727e-185	7	DENND1B	1.13801e-225	0.60376	0.66	0.185	2.11864e-221	7	DENND1B
CD522	1.02798e-188	0.740029	0.81	0.245	1.9138e-184	7	CD52	4.07338e-219	0.740029	0.81	0.245	7.58341e-215	7	CD52
ANPEP1	1.86717e-188	0.607006	0.533	0.079	3.47612e-184	7	ANPEP	0	0.607006	0.533	0.079	0	7	ANPEP
HCK1	2.19335e-185	0.645367	0.784	0.227	4.08336e-181	7	HCK	3.81699e-230	0.645367	0.784	0.227	7.10609e-226	7	HCK
LDLRAD4	7.61387e-185	0.559221	0.578	0.102	1.41747e-180	7	LDLRAD4	0	0.559221	0.578	0.102	0	7	LDLRAD4
RAB7L1	8.92348e-185	0.512524	0.597	0.126	1.66128e-180	7	RAB7L1	1.69348e-277	0.512524	0.597	0.126	3.15274e-273	7	RAB7L1
FNIP2	1.04428e-183	0.570108	0.601	0.145	1.94414e-179	7	FNIP2	4.64933e-240	0.570108	0.601	0.145	8.65566e-236	7	FNIP2
ANXA63	2.47889e-182	0.551588	0.702	0.171	4.61495e-178	7	ANXA6	1.44922e-263	0.551588	0.702	0.171	2.69802e-259	7	ANXA6
DAPP11	5.88899e-181	0.60703	0.763	0.222	1.09635e-176	7	DAPP1	6.07711e-243	0.60703	0.763	0.222	1.13138e-238	7	DAPP1
SMCO41	1.65996e-180	0.661908	0.779	0.249	3.09035e-176	7	SMCO4	4.83143e-227	0.661908	0.779	0.249	8.99467e-223	7	SMCO4
EVI2B1	3.76299e-178	0.63109	0.789	0.24	7.00555e-174	7	EVI2B	5.23776e-213	0.63109	0.789	0.24	9.75113e-209	7	EVI2B
HLA-DQA21	1.37523e-177	1.07945	0.771	0.242	2.56026e-173	7	HLA-DQA2	4.14343e-225	1.07945	0.771	0.242	7.71382e-221	7	HLA-DQA2
PSMB93	5.47193e-177	0.720811	0.966	0.646	1.01871e-172	7	PSMB9	4.82602e-154	0.720811	0.966	0.646	8.98461e-150	7	PSMB9
P2RY14	1.62553e-174	0.514839	0.523	0.084	3.02625e-170	7	P2RY14	0	0.514839	0.523	0.084	0	7	P2RY14
ARHGDIB2	7.47141e-173	0.742052	0.965	0.538	1.39095e-168	7	ARHGDIB	1.90792e-168	0.742052	0.965	0.538	3.55197e-164	7	ARHGDIB
CD372	3.21463e-172	0.619272	0.778	0.239	5.98467e-168	7	CD37	5.54591e-213	0.619272	0.778	0.239	1.03248e-208	7	CD37
CBX6	5.36695e-171	0.640635	0.676	0.196	9.99165e-167	7	CBX6	2.65e-216	0.640635	0.676	0.196	4.9335e-212	7	CBX6
MIR142	4.27379e-165	0.695721	0.644	0.162	7.95652e-161	7	MIR142	4.99065e-238	0.695721	0.644	0.162	9.29109e-234	7	MIR142
CAP11	1.49247e-159	0.633553	0.981	0.775	2.77854e-155	7	CAP1	2.91389e-141	0.633553	0.981	0.775	5.42479e-137	7	CAP1
HAVCR21	3.43451e-157	0.582153	0.659	0.17	6.39403e-153	7	HAVCR2	4.65532e-223	0.582153	0.659	0.17	8.66682e-219	7	HAVCR2
2020-03-11	1.90781e-156	0.567984	0.678	0.183	3.55177e-152	7	2020-03-01	2.4097e-214	0.567984	0.678	0.183	4.48613e-210	7	2020-03-01
PTP4A2	6.37086e-156	0.576995	0.815	0.543	1.18606e-151	7	PTP4A2	6.64473e-101	0.576995	0.815	0.543	1.23705e-96	7	PTP4A2
CST72	2.16704e-155	0.971222	0.697	0.205	4.03439e-151	7	CST7	1.98366e-208	0.971222	0.697	0.205	3.69298e-204	7	CST7
AP1S22	7.85264e-154	0.578219	0.826	0.311	1.46193e-149	7	AP1S2	4.18883e-180	0.578219	0.826	0.311	7.79835e-176	7	AP1S2
CSF2RA1	1.42456e-150	0.511027	0.699	0.206	2.6521e-146	7	CSF2RA	1.05889e-188	0.511027	0.699	0.206	1.97133e-184	7	CSF2RA
CD831	1.85301e-149	0.614281	0.794	0.285	3.44974e-145	7	CD83	1.35654e-158	0.614281	0.794	0.285	2.52546e-154	7	CD83
LY861	1.28554e-148	0.546803	0.622	0.156	2.3933e-144	7	LY86	2.25773e-218	0.546803	0.622	0.156	4.20322e-214	7	LY86
S100B1	2.26104e-148	0.947839	0.705	0.217	4.20938e-144	7	S100B	3.99069e-196	0.947839	0.705	0.217	7.42947e-192	7	S100B
QPCT1	5.11359e-147	0.52915	0.633	0.165	9.51998e-143	7	QPCT	1.11288e-227	0.52915	0.633	0.165	2.07184e-223	7	QPCT
C3orf58	1.24977e-145	0.506812	0.507	0.185	2.32669e-141	7	C3orf58	8.77441e-112	0.506812	0.507	0.185	1.63353e-107	7	C3orf58
EVI2A1	6.57291e-144	0.534209	0.673	0.195	1.22368e-139	7	EVI2A	1.96157e-192	0.534209	0.673	0.195	3.65185e-188	7	EVI2A
WARS2	2.88774e-141	0.673434	0.749	0.277	5.37611e-137	7	WARS	5.42946e-181	0.673434	0.749	0.277	1.0108e-176	7	WARS
SERPINF12	5.09488e-139	0.589551	0.779	0.287	9.48514e-135	7	SERPINF1	5.12545e-149	0.589551	0.779	0.287	9.54205e-145	7	SERPINF1
C20orf27	4.4348e-138	0.503256	0.647	0.336	8.25626e-134	7	C20orf27	8.16559e-88	0.503256	0.647	0.336	1.52019e-83	7	C20orf27
CYB5R32	6.86499e-136	0.518074	0.821	0.501	1.27806e-131	7	CYB5R3	1.00712e-112	0.518074	0.821	0.501	1.87496e-108	7	CYB5R3
PLEKHO11	2.56931e-135	0.574694	0.673	0.215	4.78328e-131	7	PLEKHO1	3.09484e-177	0.574694	0.673	0.215	5.76167e-173	7	PLEKHO1
PTPN2	3.89279e-135	0.516357	0.725	0.374	7.2472e-131	7	PTPN2	1.4468e-107	0.516357	0.725	0.374	2.69351e-103	7	PTPN2
CCDC88A1	2.50218e-134	0.532149	0.68	0.228	4.65831e-130	7	CCDC88A	1.61627e-170	0.532149	0.68	0.228	3.00901e-166	7	CCDC88A
EVL1	4.20057e-134	0.579944	0.67	0.246	7.8202e-130	7	EVL	3.32003e-154	0.579944	0.67	0.246	6.1809e-150	7	EVL
SERPINB61	1.97879e-132	0.512892	0.694	0.311	3.68392e-128	7	SERPINB6	2.06334e-121	0.512892	0.694	0.311	3.84132e-117	7	SERPINB6
CCND12	1.45957e-131	0.770905	0.85	0.528	2.71728e-127	7	CCND1	1.02987e-105	0.770905	0.85	0.528	1.91731e-101	7	CCND1
ERAP2	1.98364e-131	0.500497	0.626	0.235	3.69294e-127	7	ERAP2	2.99885e-135	0.500497	0.626	0.235	5.58295e-131	7	ERAP2
MARCKSL11	6.2039e-126	0.63981	0.8	0.345	1.15498e-121	7	MARCKSL1	2.76784e-154	0.63981	0.8	0.345	5.15288e-150	7	MARCKSL1
CXCR42	5.03509e-124	0.524409	0.675	0.226	9.37383e-120	7	CXCR4	1.30063e-143	0.524409	0.675	0.226	2.42139e-139	7	CXCR4
TAP2.11	5.07947e-117	0.503893	0.739	0.356	9.45645e-113	7	TAP2.1	7.04086e-117	0.503893	0.739	0.356	1.3108e-112	7	TAP2.1
TUBA1A2	5.80102e-117	0.664072	0.895	0.497	1.07998e-112	7	TUBA1A	1.51456e-120	0.664072	0.895	0.497	2.81966e-116	7	TUBA1A
BCL2A11	1.5861e-114	0.538018	0.605	0.187	2.95284e-110	7	BCL2A1	8.25185e-147	0.538018	0.605	0.187	1.53625e-142	7	BCL2A1
LTB2	2.3846e-95	0.546559	0.583	0.198	4.43941e-91	7	LTB	9.79613e-122	0.546559	0.583	0.198	1.82374e-117	7	LTB
CKLF2	4.82925e-95	0.515819	0.805	0.402	8.99062e-91	7	CKLF	5.53996e-104	0.515819	0.805	0.402	1.03137e-99	7	CKLF
ATF5	5.92414e-92	0.656571	0.576	0.264	1.1029e-87	7	ATF5	1.24792e-86	0.656571	0.576	0.264	2.32325e-82	7	ATF5
CD40	1.47619e-86	0.692241	0.522	0.227	2.74823e-82	7	CD40	1.09531e-81	0.692241	0.522	0.227	2.03914e-77	7	CD40
LAP32	2.02145e-85	0.577997	0.813	0.534	3.76333e-81	7	LAP3	1.09521e-85	0.577997	0.813	0.534	2.03895e-81	7	LAP3
RNASET21	9.4528e-83	0.518823	0.742	0.418	1.75983e-78	7	RNASET2	4.3679e-83	0.518823	0.742	0.418	8.13173e-79	7	RNASET2
DUSP22	9.6337e-59	0.56181	0.762	0.491	1.79351e-54	7	DUSP2	8.50815e-63	0.56181	0.762	0.491	1.58396e-58	7	DUSP2
IGJ	0	3.67473	0.765	0.016	0	8	IGJ	0	3.67473	0.765	0.016	0	8	IGJ
GZMB	0	2.91069	0.575	0.042	0	8	GZMB	0	2.91069	0.575	0.042	0	8	GZMB
MZB1	0	2.1692	0.621	0.009	0	8	MZB1	0	2.1692	0.621	0.009	0	8	MZB1
PLAC8	0	2.03954	0.638	0.042	0	8	PLAC8	0	2.03954	0.638	0.042	0	8	PLAC8
DERL3	0	1.89547	0.571	0.014	0	8	DERL3	0	1.89547	0.571	0.014	0	8	DERL3
IRF71	0	1.65184	0.7	0.303	0	8	IRF7	8.49807e-154	1.65184	0.7	0.303	1.58208e-149	8	IRF7
ITM2C2	0	1.64204	0.719	0.165	0	8	ITM2C	0	1.64204	0.719	0.165	0	8	ITM2C
HERPUD1	0	1.55627	0.913	0.602	0	8	HERPUD1	2.79924e-166	1.55627	0.913	0.602	5.21135e-162	8	HERPUD1
TSPAN13	0	1.3995	0.676	0.158	0	8	TSPAN13	7.38749e-279	1.3995	0.676	0.158	1.37533e-274	8	TSPAN13
PTPRCAP1	0	1.34214	0.826	0.058	0	8	PTPRCAP	0	1.34214	0.826	0.058	0	8	PTPRCAP
TCF41	0	1.20389	0.715	0.293	0	8	TCF4	3.44482e-164	1.20389	0.715	0.293	6.41322e-160	8	TCF4
SELL	0	1.1165	0.68	0.04	0	8	SELL	0	1.1165	0.68	0.04	0	8	SELL
CCDC501	0	1.06798	0.632	0.257	0	8	CCDC50	7.59563e-133	1.06798	0.632	0.257	1.41408e-128	8	CCDC50
UGCG	0	0.864068	0.551	0.23	0	8	UGCG	1.28513e-100	0.864068	0.551	0.23	2.39253e-96	8	UGCG
UBE2J1	0	0.786783	0.67	0.256	0	8	UBE2J1	8.05216e-143	0.786783	0.67	0.256	1.49907e-138	8	UBE2J1
SEC11C1	6.90066e-319	0.888787	0.575	0.334	1.2846966694e-314	8	SEC11C	1.1808e-56	0.888787	0.575	0.334	2.1983e-52	8	SEC11C
SEL1L3	2.6113e-302	0.702507	0.545	0.06	4.86146e-298	8	SEL1L3	0	0.702507	0.545	0.06	0	8	SEL1L3
CXCR43	9.05557e-286	1.60603	0.905	0.224	1.68588e-281	8	CXCR4	0	1.60603	0.905	0.224	0	8	CXCR4
MEF2C1	2.57508e-274	1.04644	0.804	0.174	4.79403e-270	8	MEF2C	0	1.04644	0.804	0.174	0	8	MEF2C
IRF81	3.21858e-256	1.34402	0.67	0.131	5.99202e-252	8	IRF8	0	1.34402	0.67	0.131	0	8	IRF8
CYBA3	1.76719e-231	1.17485	0.998	0.626	3.28998e-227	8	CYBA	4.30567e-195	1.17485	0.998	0.626	8.01587e-191	8	CYBA
LTB3	3.33485e-230	1.93801	0.753	0.197	6.20848e-226	8	LTB	5.24078e-257	1.93801	0.753	0.197	9.75676e-253	8	LTB
SPIB	6.36885e-230	1.09789	0.557	0.067	1.18569e-225	8	SPIB	0	1.09789	0.557	0.067	0	8	SPIB
RAC21	4.50471e-196	0.914803	0.743	0.169	8.38641e-192	8	RAC2	7.80276e-275	0.914803	0.743	0.169	1.45264e-270	8	RAC2
TRAM12	2.54162e-193	0.694314	0.731	0.485	4.73174e-189	8	TRAM1	1.38387e-81	0.694314	0.731	0.485	2.57636e-77	8	TRAM1
RNASET22	1.1142e-191	0.866322	0.777	0.419	2.0743e-187	8	RNASET2	4.24214e-119	0.866322	0.777	0.419	7.8976e-115	8	RNASET2
PLD4	2.37912e-188	0.979128	0.53	0.106	4.42921e-184	8	PLD4	8.43536e-222	0.979128	0.53	0.106	1.57041e-217	8	PLD4
CD373	1.43954e-179	0.9495	0.761	0.241	2.67999e-175	8	CD37	1.16593e-194	0.9495	0.761	0.241	2.1706e-190	8	CD37
SPCS31	2.03506e-179	0.632662	0.632	0.429	3.78868e-175	8	SPCS3	2.73561e-50	0.632662	0.632	0.429	5.09288e-46	8	SPCS3
PPM1K	1.35272e-177	0.628776	0.545	0.079	2.51836e-173	8	PPM1K	0	0.628776	0.545	0.079	0	8	PPM1K
NUCB2	3.09993e-172	0.601984	0.512	0.21	5.77114e-168	8	NUCB2	1.36875e-78	0.601984	0.512	0.21	2.5482e-74	8	NUCB2
CYB561A31	7.79084e-159	0.737011	0.557	0.228	1.45042e-154	8	CYB561A3	5.79253e-99	0.737011	0.557	0.228	1.0784e-94	8	CYB561A3
ALOX5AP2	1.32401e-157	1.39861	0.652	0.216	2.4649e-153	8	ALOX5AP	1.50846e-157	1.39861	0.652	0.216	2.8083e-153	8	ALOX5AP
BCL11A	4.60489e-144	0.57382	0.502	0.254	8.57292e-140	8	BCL11A	4.30156e-55	0.57382	0.502	0.254	8.00822e-51	8	BCL11A
CORO1A3	4.61008e-133	0.756398	0.854	0.316	8.58259e-129	8	CORO1A	1.67089e-138	0.756398	0.854	0.316	3.1107e-134	8	CORO1A
NCF1	2.59858e-122	0.595433	0.508	0.105	4.83778e-118	8	NCF1	1.40866e-191	0.595433	0.508	0.105	2.6225e-187	8	NCF1
C12orf752	1.99228e-121	0.921025	0.617	0.386	3.70903e-117	8	C12orf75	3.64221e-60	0.921025	0.617	0.386	6.7807e-56	8	C12orf75
CD533	9.84884e-117	0.707221	0.737	0.253	1.83356e-112	8	CD53	3.00983e-145	0.707221	0.737	0.253	5.60341e-141	8	CD53
ISG202	1.01395e-114	0.881009	0.66	0.235	1.88768e-110	8	ISG20	1.18818e-135	0.881009	0.66	0.235	2.21204e-131	8	ISG20
RGS12	3.02337e-108	0.709751	0.87	0.387	5.6286e-104	8	RGS1	4.02941e-103	0.709751	0.87	0.387	7.50155e-99	8	RGS1
LAPTM53	1.43247e-98	0.583647	0.802	0.336	2.66684e-94	8	LAPTM5	5.91206e-91	0.583647	0.802	0.336	1.10065e-86	8	LAPTM5
GPR1831	1.75947e-86	0.727312	0.753	0.315	3.2756e-82	8	GPR183	7.10869e-94	0.727312	0.753	0.315	1.32342e-89	8	GPR183
UCP23	4.92049e-86	0.642787	0.696	0.273	9.16047e-82	8	UCP2	1.97191e-104	0.642787	0.696	0.273	3.67111e-100	8	UCP2
FERMT32	5.39225e-86	0.556757	0.538	0.187	1.00387e-81	8	FERMT3	1.27153e-98	0.556757	0.538	0.187	2.3672e-94	8	FERMT3
1963-09-01	1.20001e-85	0.548823	0.599	0.23	2.23406e-81	8	2020-09-06	8.30335e-98	0.548823	0.599	0.23	1.54583e-93	8	2020-09-06
LIMD23	1.21082e-79	0.615002	0.569	0.2	2.25419e-75	8	LIMD2	3.27841e-100	0.615002	0.569	0.2	6.10341e-96	8	LIMD2
EVI2B2	3.58403e-71	0.594797	0.623	0.243	6.67239e-67	8	EVI2B	1.96404e-86	0.594797	0.623	0.243	3.65646e-82	8	EVI2B
LDHB3	8.6457e-69	0.528738	0.781	0.447	1.60957e-64	8	LDHB	1.89744e-75	0.528738	0.781	0.447	3.53247e-71	8	LDHB
BTG2	1.21549e-66	0.720331	0.887	0.649	2.26288e-62	8	BTG2	2.00609e-53	0.720331	0.887	0.649	3.73473e-49	8	BTG2
RNASE61	4.24321e-64	0.53387	0.595	0.234	7.89958e-60	8	RNASE6	6.69348e-80	0.53387	0.595	0.234	1.24612e-75	8	RNASE6
CD523	9.26357e-58	0.837212	0.581	0.249	1.7246e-53	8	CD52	5.07794e-70	0.837212	0.581	0.249	9.4536e-66	8	CD52
RGS21	1.13009e-45	0.822159	0.668	0.402	2.10389e-41	8	RGS2	1.69249e-46	0.822159	0.668	0.402	3.15091e-42	8	RGS2
SERPINF13	1.8303e-43	0.604085	0.555	0.291	3.40747e-39	8	SERPINF1	5.00324e-48	0.604085	0.555	0.291	9.31452e-44	8	SERPINF1
CCL21	0	5.10652	0.941	0.027	0	9	CCL21	0	5.10652	0.941	0.027	0	9	CCL21	Endothelial cells
IGFBP72	0	3.1938	1	0.184	0	9	IGFBP7	0	3.1938	1	0.184	0	9	IGFBP7
TFF3	0	2.99167	0.966	0.007	0	9	TFF3	0	2.99167	0.966	0.007	0	9	TFF3
FABP4	0	2.98124	0.826	0.007	0	9	FABP4	0	2.98124	0.826	0.007	0	9	FABP4
TFPI1	0	2.77787	1	0.027	0	9	TFPI	0	2.77787	1	0.027	0	9	TFPI
CLDN5	0	2.66131	0.941	0.006	0	9	CLDN5	0	2.66131	0.941	0.006	0	9	CLDN5
MMRN1	0	2.59195	0.983	0.004	0	9	MMRN1	0	2.59195	0.983	0.004	0	9	MMRN1
GNG112	0	2.54651	0.992	0.056	0	9	GNG11	0	2.54651	0.992	0.056	0	9	GNG11
EFEMP11	0	2.18338	0.822	0.138	0	9	EFEMP1	6.07871e-249	2.18338	0.822	0.138	1.13167e-244	9	EFEMP1
ECSCR	0	1.97923	0.966	0.006	0	9	ECSCR	0	1.97923	0.966	0.006	0	9	ECSCR
RAMP2	0	1.87186	0.962	0.021	0	9	RAMP2	0	1.87186	0.962	0.021	0	9	RAMP2
SNCG	0	1.75478	0.847	0.028	0	9	SNCG	0	1.75478	0.847	0.028	0	9	SNCG
EGFL7	0	1.66255	0.903	0.035	0	9	EGFL7	0	1.66255	0.903	0.035	0	9	EGFL7
LYVE1	0	1.59977	0.75	0.002	0	9	LYVE1	0	1.59977	0.75	0.002	0	9	LYVE1
HYAL2	0	1.57187	0.86	0.161	0	9	HYAL2	3.15263e-248	1.57187	0.86	0.161	5.86925e-244	9	HYAL2
ARHGAP29	0	1.46094	0.907	0.113	0	9	ARHGAP29	0	1.46094	0.907	0.113	0	9	ARHGAP29
SDPR	0	1.44621	0.847	0.012	0	9	SDPR	0	1.44621	0.847	0.012	0	9	SDPR
PROX1	0	1.4126	0.826	0.004	0	9	PROX1	0	1.4126	0.826	0.004	0	9	PROX1
APP3	0	1.37796	0.966	0.484	0	9	APP	3.27882e-137	1.37796	0.966	0.484	6.10419e-133	9	APP
PPFIBP12	0	1.33363	0.928	0.189	0	9	PPFIBP1	5.97117e-251	1.33363	0.928	0.189	1.11165e-246	9	PPFIBP1
AC011526.1	0	1.26593	0.818	0.006	0	9	AC011526.1	0	1.26593	0.818	0.006	0	9	AC011526.1
ELK3	0	1.25543	0.839	0.12	0	9	ELK3	1.10083e-297	1.25543	0.839	0.12	2.04941e-293	9	ELK3
TGFBR2	0	1.16237	0.801	0.141	0	9	TGFBR2	4.77508e-227	1.16237	0.801	0.141	8.88977e-223	9	TGFBR2
TIE1	0	1.07026	0.737	0.005	0	9	TIE1	0	1.07026	0.737	0.005	0	9	TIE1
CLU	3.261822592791e-311	2.51307	0.856	0.053	6.07254e-307	9	CLU	0	2.51307	0.856	0.053	0	9	CLU
TIMP31	1.02047e-306	1.78728	0.903	0.077	1.89982e-302	9	TIMP3	0	1.78728	0.903	0.077	0	9	TIMP3
VWF	7.301e-299	1.4997	0.758	0.009	1.35923e-294	9	VWF	0	1.4997	0.758	0.009	0	9	VWF
NR2F2	1.2202e-297	1.13897	0.784	0.025	2.27165e-293	9	NR2F2	0	1.13897	0.784	0.025	0	9	NR2F2
SEMA3A	8.04847e-288	0.895026	0.593	0.002	1.49838e-283	9	SEMA3A	0	0.895026	0.593	0.002	0	9	SEMA3A
AKAP121	4.44192e-275	1.83223	0.742	0.025	8.26952e-271	9	AKAP12	0	1.83223	0.742	0.025	0	9	AKAP12
FLT4	1.34168e-271	0.635657	0.53	0.001	2.49781e-267	9	FLT4	0	0.635657	0.53	0.001	0	9	FLT4
RHOJ	4.67369e-264	0.842062	0.631	0.006	8.70102e-260	9	RHOJ	0	0.842062	0.631	0.006	0	9	RHOJ
TM4SF1	3.41693e-261	1.82432	0.919	0.207	6.36131e-257	9	TM4SF1	2.82468e-224	1.82432	0.919	0.207	5.2587e-220	9	TM4SF1
TM4SF18	8.89279e-260	0.854358	0.568	0.002	1.65557e-255	9	TM4SF18	0	0.854358	0.568	0.002	0	9	TM4SF18
WWTR1	7.37616e-259	1.0013	0.746	0.16	1.37322e-254	9	WWTR1	3.04468e-164	1.0013	0.746	0.16	5.66828e-160	9	WWTR1
PROCR	2.47879e-255	0.95548	0.703	0.13	4.61476e-251	9	PROCR	1.52743e-174	0.95548	0.703	0.13	2.84362e-170	9	PROCR
LDB2	8.38537e-251	1.02562	0.614	0.006	1.5611e-246	9	LDB2	0	1.02562	0.614	0.006	0	9	LDB2
KANK3	3.42256e-247	0.783081	0.623	0.009	6.37177e-243	9	KANK3	0	0.783081	0.623	0.009	0	9	KANK3
CXorf36	4.57695e-245	0.84202	0.589	0.004	8.52091e-241	9	CXorf36	0	0.84202	0.589	0.004	0	9	CXorf36
MTUS1	3.07213e-241	0.935286	0.691	0.174	5.71938e-237	9	MTUS1	2.59303e-124	0.935286	0.691	0.174	4.82744e-120	9	MTUS1
C16orf62	3.8806e-240	0.671883	0.547	0.112	7.22451e-236	9	C16orf62	4.49263e-111	0.671883	0.547	0.112	8.36394e-107	9	C16orf62
ADIRF1	7.64838e-238	1.95063	0.852	0.312	1.4239e-233	9	ADIRF	6.41116e-125	1.95063	0.852	0.312	1.19357e-120	9	ADIRF
CDH5	3.21889e-233	0.720792	0.568	0.004	5.9926e-229	9	CDH5	0	0.720792	0.568	0.004	0	9	CDH5
CD592	4.04223e-226	1.38641	0.992	0.646	7.52542e-222	9	CD59	5.00289e-121	1.38641	0.992	0.646	9.31389e-117	9	CD59
RASGRP3	8.72012e-224	0.97598	0.631	0.048	1.62342e-219	9	RASGRP3	0	0.97598	0.631	0.048	0	9	RASGRP3
NNMT1	3.51917e-217	1.60098	0.877	0.073	6.55164e-213	9	NNMT	0	1.60098	0.877	0.073	0	9	NNMT
CALCRL	4.92165e-211	1.05706	0.712	0.097	9.16263e-207	9	CALCRL	5.28874e-245	1.05706	0.712	0.097	9.84605e-241	9	CALCRL
PDPN1	3.98569e-210	1.33486	0.72	0.114	7.42016e-206	9	PDPN	1.83393e-215	1.33486	0.72	0.114	3.41423e-211	9	PDPN
CYB5R33	5.18728e-208	0.958557	0.89	0.503	9.65717e-204	9	CYB5R3	1.28789e-87	0.958557	0.89	0.503	2.39767e-83	9	CYB5R3
CNN32	3.87669e-206	1.30393	0.919	0.182	7.21722e-202	9	CNN3	4.25484e-237	1.30393	0.919	0.182	7.92123e-233	9	CNN3
IGF1	4.49142e-203	0.865306	0.53	0.005	8.36167e-199	9	IGF1	0	0.865306	0.53	0.005	0	9	IGF1
ROBO4	8.13814e-202	0.745437	0.508	0.005	1.51508e-197	9	ROBO4	0	0.745437	0.508	0.005	0	9	ROBO4
CD992	2.95403e-200	1.12321	0.987	0.712	5.49952e-196	9	CD99	2.36003e-99	1.12321	0.987	0.712	4.39368e-95	9	CD99
KLF2	6.21792e-198	1.13473	0.695	0.088	1.15759e-193	9	KLF2	3.41455e-255	1.13473	0.695	0.088	6.35686e-251	9	KLF2
MDK	1.40472e-197	1.26006	0.754	0.114	2.61517e-193	9	MDK	3.77916e-238	1.26006	0.754	0.114	7.03566e-234	9	MDK
GYPC3	5.60968e-194	1.22362	0.843	0.106	1.04435e-189	9	GYPC	0	1.22362	0.843	0.106	0	9	GYPC
FAM43A	7.59725e-191	1.03161	0.636	0.075	1.41438e-186	9	FAM43A	2.73947e-244	1.03161	0.636	0.075	5.10007e-240	9	FAM43A
APOD1	1.91217e-187	1.42082	0.763	0.045	3.55988e-183	9	APOD	0	1.42082	0.763	0.045	0	9	APOD
GIMAP5	1.67415e-183	0.937443	0.678	0.038	3.11676e-179	9	GIMAP5	0	0.937443	0.678	0.038	0	9	GIMAP5
PLSCR4	2.55901e-178	0.669447	0.504	0.044	4.7641e-174	9	PLSCR4	2.87502e-261	0.669447	0.504	0.044	5.35242e-257	9	PLSCR4
IGFBP41	2.22292e-176	1.28064	0.86	0.113	4.13842e-172	9	IGFBP4	0	1.28064	0.86	0.113	0	9	IGFBP4
CRIP21	5.06392e-176	1.13814	0.881	0.331	9.42749e-172	9	CRIP2	1.73636e-123	1.13814	0.881	0.331	3.23258e-119	9	CRIP2
LAMA41	3.23115e-172	0.957667	0.678	0.041	6.01544e-168	9	LAMA4	0	0.957667	0.678	0.041	0	9	LAMA4
TIMP12	9.88289e-172	2.11235	0.983	0.541	1.8399e-167	9	TIMP1	3.35854e-104	2.11235	0.983	0.541	6.2526e-100	9	TIMP1
LIMS11	1.58758e-171	1.05992	0.873	0.457	2.95559e-167	9	LIMS1	1.47057e-90	1.05992	0.873	0.457	2.73776e-86	9	LIMS1
FN12	1.38757e-170	1.50062	0.725	0.049	2.58324e-166	9	FN1	0	1.50062	0.725	0.049	0	9	FN1
FXYD6	2.6434e-170	0.903567	0.585	0.03	4.92122e-166	9	FXYD6	0	0.903567	0.585	0.03	0	9	FXYD6
CFI	4.94853e-168	0.610116	0.555	0.015	9.21269e-164	9	CFI	0	0.610116	0.555	0.015	0	9	CFI
SPTBN11	2.03313e-166	0.929976	0.852	0.265	3.78508e-162	9	SPTBN1	4.43957e-129	0.929976	0.852	0.265	8.26515e-125	9	SPTBN1
SMAD1	5.83291e-164	0.676696	0.585	0.129	1.08591e-159	9	SMAD1	1.04706e-110	0.676696	0.585	0.129	1.94931e-106	9	SMAD1
MAN1A1	4.13517e-160	0.725538	0.619	0.112	7.69845e-156	9	MAN1A1	5.58909e-149	0.725538	0.619	0.112	1.04052e-144	9	MAN1A1
GIMAP4	5.84353e-160	1.0892	0.725	0.081	1.08789e-155	9	GIMAP4	3.05361e-297	1.0892	0.725	0.081	5.6849e-293	9	GIMAP4
COL4A11	9.79253e-159	0.948922	0.636	0.031	1.82308e-154	9	COL4A1	0	0.948922	0.636	0.031	0	9	COL4A1
IFITM23	2.53948e-157	1.27224	0.953	0.352	4.72776e-153	9	IFITM2	1.41113e-139	1.27224	0.953	0.352	2.6271e-135	9	IFITM2
GIMAP7	7.03617e-156	1.14844	0.699	0.072	1.30992e-151	9	GIMAP7	0	1.14844	0.699	0.072	0	9	GIMAP7
TBX1	1.03813e-154	0.55677	0.538	0.032	1.93268e-150	9	TBX1	0	0.55677	0.538	0.032	0	9	TBX1
UTRN	2.52079e-154	0.780297	0.712	0.196	4.69295e-150	9	UTRN	2.05045e-112	0.780297	0.712	0.196	3.81733e-108	9	UTRN
RAB11A	1.14381e-153	0.836366	0.983	0.756	2.12943e-149	9	RAB11A	1.24527e-86	0.836366	0.983	0.756	2.31831e-82	9	RAB11A
ENG	8.9317e-153	1.09646	0.712	0.126	1.66282e-148	9	ENG	2.9046e-183	1.09646	0.712	0.126	5.40749e-179	9	ENG
SHC1	8.13464e-151	0.645323	0.589	0.167	1.51443e-146	9	SHC1	3.69422e-83	0.645323	0.589	0.167	6.87753e-79	9	SHC1
EDNRB1	2.76519e-150	0.693657	0.593	0.03	5.14796e-146	9	EDNRB	0	0.693657	0.593	0.03	0	9	EDNRB
NUDT4	6.11786e-150	0.720982	0.517	0.211	1.13896e-145	9	NUDT4	2.30585e-42	0.720982	0.517	0.211	4.29281e-38	9	NUDT4
TCF42	1.67009e-149	1.03648	0.822	0.295	3.1092e-145	9	TCF4	1.37232e-108	1.03648	0.822	0.295	2.55484e-104	9	TCF4
PTRF2	2.88985e-146	1.02488	0.852	0.318	5.38004e-142	9	PTRF	1.96592e-113	1.02488	0.852	0.318	3.65995e-109	9	PTRF
CTHRC11	3.34262e-146	0.995158	0.636	0.038	6.22295e-142	9	CTHRC1	0	0.995158	0.636	0.038	0	9	CTHRC1
COX7A11	7.03106e-146	0.802123	0.606	0.032	1.30897e-141	9	COX7A1	0	0.802123	0.606	0.032	0	9	COX7A1
IL6ST1	1.17002e-145	0.816906	0.703	0.259	2.17822e-141	9	IL6ST	8.30978e-79	0.816906	0.703	0.259	1.54703e-74	9	IL6ST
ADD3	8.11381e-144	0.749472	0.678	0.157	1.51055e-139	9	ADD3	8.44683e-126	0.749472	0.678	0.157	1.57255e-121	9	ADD3
ARL4A	2.98124e-143	1.17414	0.852	0.432	5.55017e-139	9	ARL4A	3.65839e-74	1.17414	0.852	0.432	6.81082e-70	9	ARL4A
GNAS	3.08994e-143	0.90509	0.932	0.679	5.75254e-139	9	GNAS	2.06014e-66	0.90509	0.932	0.679	3.83537e-62	9	GNAS
LAYN	6.21521e-139	0.686221	0.551	0.026	1.15709e-134	9	LAYN	0	0.686221	0.551	0.026	0	9	LAYN
ABI3BP	1.27659e-137	0.705634	0.517	0.02	2.37663e-133	9	ABI3BP	0	0.705634	0.517	0.02	0	9	ABI3BP
PPP1R21	7.82628e-136	0.81349	0.822	0.404	1.45702e-131	9	PPP1R2	2.75947e-75	0.81349	0.822	0.404	5.1373e-71	9	PPP1R2
S100A132	1.91776e-135	0.972046	0.86	0.303	3.5703e-131	9	S100A13	1.49502e-116	0.972046	0.86	0.303	2.78328e-112	9	S100A13
APLP2	2.06825e-133	0.819869	0.856	0.539	3.85046e-129	9	APLP2	5.80331e-64	0.819869	0.856	0.539	1.0804e-59	9	APLP2
BACE21	2.24052e-132	0.979578	0.72	0.13	4.17118e-128	9	BACE2	3.76348e-180	0.979578	0.72	0.13	7.00647e-176	9	BACE2
SEPN1	5.17106e-125	0.56364	0.542	0.116	9.62696e-121	9	SEPN1	4.49444e-102	0.56364	0.542	0.116	8.36729e-98	9	SEPN1
PRSS231	9.22559e-125	1.06446	0.75	0.11	1.71753e-120	9	PRSS23	2.39256e-228	1.06446	0.75	0.11	4.45422e-224	9	PRSS23
EHD2	5.13921e-124	0.651314	0.593	0.126	9.56767e-120	9	EHD2	2.60898e-115	0.651314	0.593	0.126	4.85714e-111	9	EHD2
LHFP1	6.25981e-122	0.719195	0.602	0.049	1.16539e-117	9	LHFP	0	0.719195	0.602	0.049	0	9	LHFP
LMO2	5.49196e-121	0.673554	0.593	0.078	1.02244e-116	9	LMO2	2.30353e-197	0.673554	0.593	0.078	4.28848e-193	9	LMO2
COL4A21	4.51403e-120	0.778345	0.551	0.035	8.40377e-116	9	COL4A2	0	0.778345	0.551	0.035	0	9	COL4A2
NRP2	1.23225e-119	0.868704	0.648	0.141	2.29408e-115	9	NRP2	1.58289e-127	0.868704	0.648	0.141	2.94688e-123	9	NRP2
VIM5	3.01323e-118	1.39517	1	0.556	5.60973e-114	9	VIM	1.60135e-111	1.39517	1	0.556	2.98123e-107	9	VIM
MGP	3.06579e-116	1.22355	0.513	0.028	5.70759e-112	9	MGP	0	1.22355	0.513	0.028	0	9	MGP
PHACTR2	6.87721e-116	0.672261	0.64	0.19	1.28033e-111	9	PHACTR2	3.06394e-86	0.672261	0.64	0.19	5.70414e-82	9	PHACTR2
SLC9A3R2	1.71097e-114	0.764167	0.508	0.056	3.18531e-110	9	SLC9A3R2	1.3868e-202	0.764167	0.508	0.056	2.58181e-198	9	SLC9A3R2
TSPAN43	1.96281e-113	0.816197	0.775	0.222	3.65416e-109	9	TSPAN4	1.63368e-114	0.816197	0.775	0.222	3.04143e-110	9	TSPAN4
VAMP52	8.45663e-113	1.02581	0.907	0.301	1.57437e-108	9	VAMP5	4.12422e-127	1.02581	0.907	0.301	7.67805e-123	9	VAMP5
TSPAN5	1.06982e-112	0.682557	0.614	0.141	1.99168e-108	9	TSPAN5	8.91978e-109	0.682557	0.614	0.141	1.66059e-104	9	TSPAN5
SPHK11	1.43395e-110	0.78298	0.644	0.098	2.66959e-106	9	SPHK1	1.00236e-184	0.78298	0.644	0.098	1.86609e-180	9	SPHK1
RARRES21	9.22612e-110	0.743808	0.547	0.041	1.71763e-105	9	RARRES2	0	0.743808	0.547	0.041	0	9	RARRES2
LEPROT2	4.37438e-104	0.67012	0.729	0.449	8.14378e-100	9	LEPROT	2.38797e-44	0.67012	0.729	0.449	4.44568e-40	9	LEPROT
HSPG2	2.17904e-102	0.726872	0.602	0.103	4.05671e-98	9	HSPG2	7.39503e-153	0.726872	0.602	0.103	1.37673e-148	9	HSPG2
TIMP22	4.51144e-98	0.765468	0.678	0.104	8.39894e-94	9	TIMP2	2.6797e-186	0.765468	0.678	0.104	4.98879e-182	9	TIMP2
PRCP2	7.75246e-98	0.781541	0.733	0.325	1.44328e-93	9	PRCP	6.86136e-65	0.781541	0.733	0.325	1.27738e-60	9	PRCP
NARF1	6.49197e-96	0.571624	0.602	0.286	1.20861e-91	9	NARF	4.99996e-42	0.571624	0.602	0.286	9.30843e-38	9	NARF
CD1513	6.69444e-96	0.767631	0.843	0.474	1.2463e-91	9	CD151	5.6892e-64	0.767631	0.843	0.474	1.05916e-59	9	CD151
BCAR1	1.9622e-94	0.549374	0.517	0.12	3.65304e-90	9	BCAR1	2.90267e-86	0.549374	0.517	0.12	5.4039e-82	9	BCAR1
CALD12	6.1436e-94	0.873287	0.919	0.365	1.14375e-89	9	CALD1	3.3265e-112	0.873287	0.919	0.365	6.19294e-108	9	CALD1
CRIM1	5.33208e-90	0.619866	0.521	0.106	9.92673e-86	9	CRIM1	2.38348e-102	0.619866	0.521	0.106	4.43732e-98	9	CRIM1
[truncated: 250 more rows]

## Sheet: 1-8
Table 1-8. The DEGs for each cluster in BC
[truncated: 490 more rows]
