# Supplementary material for: Characterizing Intercellular Communication of Pan-Cancer Reveals SPP1+ Tumor-Associated Macrophage Expanded in Hypoxia and Promoting Cancer Malignancy Through Single-Cell RNA-Seq Data
Source: Front Cell Dev Biol. 2021 Oct 5;9:749210. doi: 10.3389/fcell.2021.749210 (PMC8523849; doi:10.3389/fcell.2021.749210)
Supplement: Supplementary file 2 [file Table_2.XLSX]

## Sheet: Table 2-1
Table 2-1. The markers for FIG.1 t-SNE map.
	T/NK cells	CD2	CD3D	CD3E	CD3G	FGFBP2	XCL1	FCGR3A	KLRD1	KLRF1
	Fibroblasts	FAP	PDPN	COL1A2	DCN	COL3A1	COL6A1	LUM
	Myeloid cells	CD14	CD163	CD68	FCGR2A	CSF1R	CD40	CD80	CD83	CCR7	AIF1	S100B	SRGN	C1QA	C1QC
	Mast cells	CMA1	MS4A2	TPSAB1	TPSB2	CPA3
	Endothelial cells	PECAM1	VWF	ENG	PLVAP	SELE
	B / plasma cells	SLAMF7	CD79A	BLNK	FCRL5	CD79A	CD79B	MS4A1
	Epithelial cells	EPCAM	KRT19	KRT7	KRT18	KRT1	DMKN	KRT6C

## Sheet: 2-2
Table 2-2. The definition for subclusers in each cell type.
T/NK cells
cancer type	BC	CRC	LC	OV	PDAC	SCC
resolution	CCA-0.2	0.4	CCA-0.2	CCA-0.3	CCA-0.5	0.3
0	CD4-S1-CD4+ T-cells	CD4-S1-CD4+ T-cells	CD8-S1-CD8+ T-cells	CD4-S1-CD4+ T-cells	CD8-S1-CD8+ T-cells	CD4-S1-Treg cells
1	CD8-S2-CD8+ resident memory T-cells	CD4-S2-Treg cells	CD4-S2-CD4+ T-cells	CD8-S2-CD8+ T-cells	CD4-S2-CD4+ T-cells	CD8-S2-CD8+ T-cells (Exhausted CD8)
2	CD8-S3-CD8+ cytotoxic effector T-cells	CD8-S3-CD8+ T-cells(Exhausted CD8)	CD8-S3-CD8+ cytotoxic effector T-cells	NK-S3-Natural killer cells	CD4-S3-CD4+ T-cells	CD8-S3-CD8+ T-cells
3	CD4-S4-Treg cells	CD8-S4-CD8+ T-cells	CD4-S4-Treg cells	CD4-S4-unknown	CD4-S4-Exhausted CD4+ T cell	CD4-S4-Exhausted CD4+ T cell
4	CD4-S5-Exhausted CD4+ T cell	CD4-S5-CD4+ T-cells-not sure	CD8-S5-Proliferating CD8+ T cells(cell cycle activation)	CD4-S5-Treg cells	CD4-S5-CD4+ T help cells-mhcⅡ	NK-S5-NK cells
5	NK-S6-Natural killer cells	CD4-S6-Th17	CD4-S6-Exhausted CD4+ T cell	CD8-S6-CD8+ T-cells	NK-S6-Natural killer cells	CD8-S6-unknown-8
6	CD8-S7-CD8+ cytotoxic effector T-cells(interferon response）	CD8-S7-CD8+ cytotoxic effector T-cells	NK-S7-Natural killer cells	CD4-S7-Proliferating cells	NK-S7-Natural killer cells	CD4-S7-unknow-4
7	CD4-S8-CD4+ T-cells	NK-S8-Natural killer cells	CD4-S8-unknown	CD8-S8-CD8+ T-cells(interferon response）	UN-S8-unknown	UN-S8-unknown
8		CD4-S9-Exhausted CD4+ T cell		CD4-S9-unknown	UN-S9-unknown
9		CD8-S10-CD8+ cytotoxic effector T-cells
Myeloid cells
cancer type	BC	CRC	LC	OC	PDAC	SCC
resolution	0.2	0.3	0.1	0.2(CCA)	0.1	0.2
0	M-S1-M2	M-S1-M2-C1(ECM remodeing/active metabolism/inflammatory response)	M-S1-M2-C1	M-S1-M2-C1	M-S1-M2-C1(ECM remodeing and active metabolism)	M-S1-M2-C1
1	M-S2-M2-C1	Mon-S2-Monocyte	M-S2-M2-C1	Mon-S2-Monocyte	M-S2-M2-C2(ECM remodeing/ctive metabolism/angiogenesis)	DC-S2-Conventional dendritic cells
2	DC-S3-Conventional dendritic cells	M-S3-M2-C2(ECM remodeing/active metabolism/cell cycle)	M-S3-M2-C2(hypoxia/angiogenesis/EMT)	M-S3-M2-C2(inflammatory response)	Mon-S3-Monocyte	M-S3-M2-C2(ECM remodeing/angiogenesis/active metabolism)
3	Mon-S4-Monocyte	DC-S4-Conventional dendritic cells	DC-S4-Conventional dendritic cells	M-S4-M1-C1	M-S4-Unknown(hypoxia/angiogenesis/EMT)	M-S4-M1-C1
4	DC-S5-Plasmacytoid DC	M-S5-M2-C3(ECM remodeing and more active metabolism)	M-S5-M1-C2	M-S5-M2-C3(hypoxia/angiogenesis)	DC-S5-Dendritic cells	DC-S5-Conventional dendritic cells
5	M-S6-M2-C2(ECM remodeing and active metabolism)	M-S6-Unknown	Mon-S6-Monocyte	M-S6-M2-C4	M-S6-Unknown	DC-S6-Dendritic cells
6	M-S7--unknown	M-S7-M1-C1	M-S7-M2-C3	Mon-S7-Monocyte	DC-S7-Plasmacytoid DC	Mon-S7
7			DC-S8-Conventional dendritic cells	DC-S8-Dendritic cells
SPP+ TAMs	MS1(0)	MS3(2)	MS1(0),MS2(1)	MS1(0),MS5(4)	MS1(0),MS2(1)	MS3(2)
Fibroblasts
cancer type	BC	CRC	LC	OC	PDAC	SCC
resolution	0.3	0.1	0.8	0.2	0.5
0	FS1-CAF-C1(EMT)	FS1-CAF-C1-FAP+	FS1-CAF-C1(EMT and angiogenesisi)	FS1-CAF-C1(EMT and angiogenesisi)	FS1-CAF-C1(EMT and angiogenesisi)
1	FS2-CAF-C2	FS2-Pericytes-ACTA2	FS2-F-C1(MYC)	FS2-F-C1	FS2-F-C1
2	FS3-Pericytes	FS3-CAF-C2	FS3-Pericytes	FS3-F-C2	FS3-F-C2
3	FS4-Myofibroblasts	FS4-CAF-C3	FS4-CAF-C2	FS4-CAF-C2(immune-related response)	FS4-Myofibroblasts
4	FS5-CAF-C3(interferon/inflammation response)	FS5-CAF-C4(IL6/TNF/)		FS5-Myofibroblasts	FS5-CAF-C2(immune-related response)
5	FS6-F-C1	FS6-Myofibroblasts		FS6-Unknown	FS6-Pericytes(angiogenesis)
6					FS7-Unknown
7
cancer cells
cancer type	BC	CRC	LC	OV	PDAC	SCC
resolution	0.1	0.2	0.1	0.1	0.2	0.15
0	CS1(Active Nucleotide synthesis)	CS1(cytoplasmic translation)	CS1(ECM remodeling and EMT)	CS1(ribosome)	CS1(EMT and inflammatory response)	CS1(differentiating)
1	CS2(EMT and angiogenesis)	CS2(EMT)	CS2(cell cycle and high metabolism)	CS2(EMT and angiogenesis)	CS2(pancreatic secretion)	CS2(basal)
2		CS3(cell cycle activation)	CS3(unknown)	CS3(cell cycle activation)	CS3(cell cycle and metabolism activation)	CS3(doublet cells)
3		CS4(cell cycle/ Nucleotide synthesis activation)		CS4(cell cycle activation)	CS4(doublet cells)	CS4(cell cycle activation)
4		CS5(hypoxia response and energy metabolism)		CS5(PID ECADHERIN NASCENT AJ PATHWAY)	CS5(EMT/angiogenesis and immune-related resonse)	CS5(cell cycle activation and DNA metabolism)
5		CS6(immune cells)		CS6(NOTCH3 Activation and fatty acid metabolism)		CS6(immune cells)
6				CS7(immune cells)
7				CS8(immune cells)
8
9

## Sheet: 2-3
Table 2-3. The makers for subcluster heatmap of T/NK cells across six cancer types.
	# T/NK cell markers
BC	Natural killer cells	FCER1G	KLRD1	KLRC1	XCL1
	CD8+ T cells	CD8A	CD8B
	CD4+ T cells	IL7R	CD4	CCR7
	Cytotoxic T cells	GZMK	GZMA	IL2	GZMM	GZMH	PRF1	IFNG	NKG7
	Exhausted T cells	LAG3	TIGIT	PDCD1	HAVCR2	CTLA4
	Treg cells	FOXP3	IL2RA	TIGIT
	Proliferating T cells	CDKN3	CDCA5	TUBA1B	MKI67
CRC	Natural killer cells	FCER1G	KLRD1	KLRC1	XCL1
	CD8+ T cells	CD8A	CD8B
	CD4+ T cells	IL7R	CD4	CCR7
	Cytotoxic T cells	GZMB	GZMA	IL2	GZMM	GZMH	PRF1	IFNG	NKG7
	Exhausted T cells	LAG3	TIGIT	PDCD1	HAVCR2	CTLA4
	Treg cells	FOXP3	IL2RA	TIGIT
	Stress related T cells	CACYBP	MRPL18	FKBP4	HSPE1	HSPB1	HSPH1	DNAJB4	JUN
LC	Natural killer cells	FCER1G	KLRD1	KLRB1	FCGR3A
	CD8+ T cells	CD8A	CD8B
	CD4+ T cells	IL7R	CD4	CCR7
	Cytotoxic T cells	GZMB	GZMA	IL2	GZMM	GZMH	PRF1	IFNG	NKG7
	Exhausted T cells	LAG3	TIGIT	PDCD1	HAVCR2	CTLA4
	Treg cells	FOXP3	IL2RA	TIGIT
	Proliferating T cells	CDKN3	CDCA5	TUBA1B	MKI67
	Stress related T cells	HSPA1A	DNAJB1	HSPA6	HSPA8	DNAJA1	HSPB1	HSPE1	JUN
OV	Natural killer cells	FCER1G	KLRD1	KLRB1	FCGR3A
	CD8+ T cells	CD8A	CD8B
	CD4+ T cells	IL7R	CD4	CCR7
	Cytotoxic T cells	GZMB	GZMA	IL2	GZMM	GZMH	PRF1	IFNG	NKG7
	Exhausted T cells	LAG3	TIGIT	PDCD1	HAVCR2	CTLA4
	Treg cells	FOXP3	IL2RA	TIGIT
PDAC	Natural killer cells	FCER1G	KLRD1	XCL1
	CD8+ T cells	CD8A	CD8B
	CD4+ T cells	IL7R	CD4	CCR7
	Cytotoxic T cells	GZMB	GZMA	IL2	GZMM	GZMH	PRF1	IFNG	NKG7
	Exhausted T cells	LAG3	TIGIT	PDCD1	HAVCR2	CTLA4
SCC	Natural killer cells	XCL1	XCL2	KLRC1	FCER1G	KLRF1
	CD8+ T cells	CD8A	CD8B
	CD4+ T cells	IL7R	CD4	CCR7
	Cytotoxic T cells	GZMB	GZMA	IL2	GZMM	GZMH	PRF1	IFNG	NKG7
	Exhausted T cells	LAG3	TIGIT	PDCD1	HAVCR2	CTLA4
	Treg cells	FOXP3	IL2RA	TIGIT

## Sheet: 2-4
Table 2-4. The makers for subcluster heatmap of myeloid cells across six cancer types.
	# Myeloid cell markers
BC	Macrophages	CD68	CD74	CD163
	M1-classically activated TAM	CXCL9	CXCL10	CXCL11	IL1A	IL1B	IL6	CCR7	CD64	CD16
	M2-alternatively activated TAM	MMP9	APOE	MMP19	CD36
	SPP1+ TAM	SPP1
	Dendritic cells	CD1C	IL3RA	CLEC9A	LILRA4	CCL17	CD2	CCR7
	Plasmacytoid DCs	CCDC50	IRF7	IRF8	ITM2C	TCF4	IL3RA
	Conventional DCs	CD1C	FCER1A	CLEC10A	MRC1	CD14
	Monocyte	CD14	S100A8	VCAN	S100A9	TIMP1
	MDSCs	S100A8	CCL2	TREM1	ITGAM	CD33	IL4R
CRC	Macrophages	CD68	CD74	CD163
	M1-classically activated TAM	CXCL9	CXCL10	CXCL11	IL1A	IL1B	IL6	CCR7	CD64	CD16
	M2-alternatively activated TAM	MMP9	APOE	MMP19	CD36	CTSZ	SLAMF9	CD168	C1QB	C1QA
	SPP1+ TAM	SPP1
	Dendritic cells	CD1C	IL3RA	CLEC9A	LILRA4	CCL17	CD2	CCR7
	Plasmacytoid DCs	CCDC50	IRF7	IRF8	ITM2C	TCF4	IL3RA
	Conventional DCs	CD1C	FCER1A	CLEC10A	MRC1	CD14
	Monocyte	CD14	S100A8	VCAN	S100A9	TIMP1	IL1RN	FCN1
	MDSCs	S100A8	CCL2	TREM1	ITGAM	CD33	IL4R
LC	Macrophages	CD68	CD74	CD163
	M1-classically activated TAM	CXCL9	CXCL10	CXCL11	IL1A	IL1B	IL6	CCR7	CD64	CD16
	M2-alternatively activated TAM	ARG1	ARG2	MMP9	VEGFA	CD163	CD206	IL10	APOE	IFI6	LY6E
	SPP1+ TAM	SPP1
	Dendritic cells	CD1C	IL3RA	CLEC9A	LILRA4	CCL17	CD2	CCR7
	Plasmacytoid DCs	CLEC4C	FCER1A	CCDC50	IRF7	IRF8	ITM2C	TCF4	IL3RA
	Conventional DCs	CD1C	FCER1A	IRF8	CLEC9A
	Neutrophils	FCGR3B	CD16
	Monocyte	CD14	S100A9	CD33	ATP2B1	FCGR3A	CX3CR1
	MDSCs	S100A8	CCL2	TREM1	ITGAM	CD33	IL4R
OV	Macrophages	CD68	CD74	CD163
	M1-classically activated TAM	CXCL9	CXCL10	CXCL11	IL1A	IL1B	IL6	CCR7	CD64	CD16
	M2-alternatively activated TAM	MMP9	APOE	IFI6	LY6E	CTSD	LGMN	CCL3	LYZ	AREG	MARCO
	SPP1+ TAM	SPP1
	Dendritic cells	CD1C	IL3RA	CLEC9A	LILRA4	CCL17	CD2	CCR7
	Plasmacytoid DCs	CLEC4C	FCER1A	CCDC50	IRF7	IRF8	ITM2C	TCF4	IL3RA
	Conventional DCs	CD1C	FCER1A	IRF8	CLEC9A
	Neutrophils	FCGR3B	CD16
	Monocyte	CD14	S100A9	CD33	ATP2B1	FCGR3A	CX3CR1
	MDSCs	S100A8	CCL2	TREM1	ITGAM	CD33	IL4R
PDAC	Macrophages	CD68	CD74	CD163
	M1-classically activated TAM	CXCL9	CXCL10	CXCL11	IL1A	IL1B	IL6	CCR7	CD64	CD16
	M2-alternatively activated TAM	MMP9	APOE	LYZ	AREG	MS4A6A	RGS10	GPNMB	MARCO
	SPP1+ TAM	SPP1
	Dendritic cells	CD1C	IL3RA	CLEC9A	LILRA4	CCL17	CD2	CCR7
	Plasmacytoid DCs	CLEC4C	FCER1A	CCDC50	IRF7	IRF8	ITM2C	TCF4	IL3RA
	Conventional DCs	CD1C	FCER1A	IRF8	CLEC9A
	Neutrophils	FCGR3B	CD16
	Monocyte	CD14	S100A9	CD33	ATP2B1	FCGR3A	CX3CR1	S100A8	S100A12	VCAN	FCN1
	MDSCs	S100A8	CCL2	TREM1	ITGAM	CD33	IL4R
SCC	Macrophages	CD68	CD74	CD163
	M1-classically activated TAM	CXCL9	CXCL10	CXCL11	IL1A	IL1B	IL6	CCR7	CD64	CD16
	M2-alternatively activated TAM	ARG1	ARG2	MMP9	VEGFA	CD163	CD206	IL10	APOE	CCL3	CCL4
	SPP1+ TAM	SPP1
	Dendritic cells	CD1C	IL3RA	CLEC9A	LILRA4	CCL17	CD2	CCR7	CCL19
	Plasmacytoid DCs	CLEC4C	FCER1A	CCDC50	IRF7	IRF8	ITM2C	TCF4	IL3RA
	Conventional DCs	CD1C	CD207	CLEC10A	MRC1	CD14	FCER1A	CD1A
	Neutrophils	FCGR3B	CD16
	Monocyte	CD14	S100A9	CD33	ATP2B1	FCGR3A	CX3CR1
	MDSCs	S100A8	CCL2	TREM1	ITGAM	CD33	IL4R

## Sheet: 2-5
Table 2-5. The makers for subcluster heatmap of fibroblasts across six cancer types.
	# Fibroblast cell markers
BC	Myofibroblasts	TAGLN	ACTA2	MYLK	TAGLN2
	Pericytes	COL18A1	NOTCH3	MYO1B	COL4A1	COL4A2	RGS5
	CAF-1	FN1	COL10A1	COL12A1	COL5A1	MMP14	FAP	AEBP1
	CAF-2	MGP	CXCL12	IGF1	S100A13
	CAF-3	STAT1	IFIT3	MX1	ISG15	IFIT1
CRC	Myofibroblasts	DES	MYLK	ACTG2	PLN
	Pericytes	ABCC9	MYO1B	KCNJ8	RGS5	CSPG4	ACTA2
	CAF-1	COL11A1	COL7A1	COL10A1	FAP	VCAN	BCAT1	DCN	MMP3
	CAF-2	SEPP1	CFD	APOD
	CAF-3	CXCL14	BMP5	MME	FRZB
	CAF-4	ANXA1	IL6	BMP2
LC	Pericytes	RGS5	LHFP	PDGFRB	RGS5	APOD
	CAF-1	CTHRC1	COL3A1	AEBP1	FAP	MMP2	PDGFRL	TAGLN	BTG1
	CAF-2	CFD	PTGDS	IGF1
OV	Myofibroblasts	MYH11	TAGLN	ACTA2	ACTG2
	CAF-1	COL5A2	COL11A1	VCAN	COL5A1	FAP	INHBA	COL1A2	BGN	COMP	COL1A1
	CAF-2	CLDN1	SAT1	EGFL6	KRT18	KRT19
	Adipocyte	APOD	CFD	PDGFRL	CXCL12
PDAC	Myofibroblasts	ACTA2	TAGLN	MYLK
	Pericytes	RGS5	COL18A1	COL4A1	COL4A2	PDGFRB
	CAF-1	COL12A1	CTHRC1	COL1A2	HTRA1	COL1A1	MMP11	COL3A1	COL5A2
	CAF-2	MGP	SEPP1	SOD3	RARRES1	GPC3	MFAP4	CTSC
	CAF-3	SAT1	MCL1	IGF1	CREM	TFPI2
	CAF-4	ABCA8	GSN	TCF4	PLXDC1	GPC3	SPTBN1
