# Supplementary material for: Characterizing Intercellular Communication of Pan-Cancer Reveals SPP1+ Tumor-Associated Macrophage Expanded in Hypoxia and Promoting Cancer Malignancy Through Single-Cell RNA-Seq Data
Source: Front Cell Dev Biol. 2021 Oct 5;9:749210. doi: 10.3389/fcell.2021.749210 (PMC8523849; doi:10.3389/fcell.2021.749210)
Supplement: Supplementary file 3 [file Table_3.XLSX]

## Sheet: Table 3-1
# Hallmark												Table 3-1. The hallmark gene list.
HALLMARK_TNFA_SIGNALING_VIA_NFKB	HALLMARK_HYPOXIA	HALLMARK_CHOLESTEROL_HOMEOSTASIS	HALLMARK_MITOTIC_SPINDLE	HALLMARK_WNT_BETA_CATENIN_SIGNALING	HALLMARK_TGF_BETA_SIGNALING	HALLMARK_IL6_JAK_STAT3_SIGNALING	HALLMARK_DNA_REPAIR	HALLMARK_G2M_CHECKPOINT	HALLMARK_APOPTOSIS	HALLMARK_NOTCH_SIGNALING	HALLMARK_ADIPOGENESIS	HALLMARK_ESTROGEN_RESPONSE_EARLY	HALLMARK_ESTROGEN_RESPONSE_LATE	HALLMARK_ANDROGEN_RESPONSE	HALLMARK_MYOGENESIS	HALLMARK_PROTEIN_SECRETION	HALLMARK_INTERFERON_ALPHA_RESPONSE	HALLMARK_INTERFERON_GAMMA_RESPONSE	HALLMARK_APICAL_JUNCTION	HALLMARK_APICAL_SURFACE	HALLMARK_HEDGEHOG_SIGNALING	HALLMARK_COMPLEMENT	HALLMARK_UNFOLDED_PROTEIN_RESPONSE	HALLMARK_PI3K_AKT_MTOR_SIGNALING	HALLMARK_MTORC1_SIGNALING	HALLMARK_E2F_TARGETS	HALLMARK_MYC_TARGETS_V1	HALLMARK_MYC_TARGETS_V2	HALLMARK_EPITHELIAL_MESENCHYMAL_TRANSITION	HALLMARK_INFLAMMATORY_RESPONSE	HALLMARK_XENOBIOTIC_METABOLISM	HALLMARK_FATTY_ACID_METABOLISM	HALLMARK_OXIDATIVE_PHOSPHORYLATION	HALLMARK_GLYCOLYSIS	HALLMARK_REACTIVE_OXYGEN_SPECIES_PATHWAY	HALLMARK_P53_PATHWAY	HALLMARK_UV_RESPONSE_UP	HALLMARK_UV_RESPONSE_DN	HALLMARK_ANGIOGENESIS	HALLMARK_HEME_METABOLISM	HALLMARK_COAGULATION	HALLMARK_IL2_STAT5_SIGNALING	HALLMARK_BILE_ACID_METABOLISM	HALLMARK_PEROXISOME	HALLMARK_ALLOGRAFT_REJECTION	HALLMARK_SPERMATOGENESIS	HALLMARK_KRAS_SIGNALING_UP	HALLMARK_KRAS_SIGNALING_DN	HALLMARK_PANCREAS_BETA_CELLS
JUNB	PGK1	FDPS	ARHGEF2	MYC	TGFBR1	IL4R	POLR2H	AURKA	CASP3	JAG1	FABP4	GREB1	TFF1	KLK3	ACTA1	ARCN1	MX1	STAT1	ACTN1	B4GALT1	SHH	C2	ATF4	MAPK8	FADS1	AURKA	PCNA	SLC19A1	COL3A1	CXCL10	CYP1A1	ACAA1	NDUFS3	PGK1	GSR	CDKN1A	NXF1	TJP1	VCAN	ALAS2	F2	SOCS2	SCP2	ABCD3	PTPRC	PDHA2	ANGPTL4	CDH16	PAX6
CXCL2	PDK1	CYP51A1	CLASP1	CTNNB1	SMAD7	IL6ST	POLR2A	CCNA2	CASP9	NOTCH3	ADIPOQ	CA12	SLC9A3R1	KLK2	TNNI2	TMED10	ISG15	ISG15	CLDN7	RHCG	PTCH1	C1S	HERPUD1	PIK3R3	DDIT4	BRCA2	PSMD8	MRTO4	COL5A2	CCL2	FAH	ACAA2	UQCRB	ALDOA	PRDX2	BTG2	SLC6A8	NFIB	POSTN	PPOX	PROC	CISH	ABCD3	ACOT8	IL12B	TSSK2	ITGA2	SPTBN2	NEUROD1
ATF3	GBE1	IDI1	KIF11	JAG2	TGFB1	STAT1	POLR2G	TOP2A	DFFA	NOTCH2	PPARG	SLC9A3R1	TPD52L1	ACSL3	MYL1	COPB2	OAS1	IFIT1	ACTN3	MAL	NRCAM	CFB	PARN	GRB2	CALR	CCP110	PSMD7	TMEM97	COL5A1	CCL5	DCXR	ACADL	NDUFS2	ENO1	TXNRD1	MDM2	BAK1	TGFBR3	FSTL1	FECH	C1S	PIM1	SLC27A2	ACOX1	TGFB1	TNP1	SPRY2	FGFR3	ISL1
NFKBIA	PFKL	FDFT1	KIF23	NOTCH1	SMURF2	IL1R1	POLR2E	CCNB2	CASP7	APH1A	LIPE	MYB	PRSS23	PIAS1	TNNC1	RAB14	IFIT3	MX1	CLDN19	LYPD3	NRP1	C1R	EXOSC4	NFKBIB	HK2	CENPE	SET	RRP9	FBN1	FPR1	CYP1A2	ACADM	SDHA	TPI1	SOD1	CCNG1	CDC5L	TFPI	LRPAP1	HMBS	MMP14	IL2RA	HSD3B7	ACSL1	IL12A	ZPBP	HBEGF	NOS1	NKX2-2
TNFAIP3	ALDOA	DHCR7	ALS2	DLL1	SMURF1	CSF2RB	POLR2J	CENPA	CFLAR	HES1	DGAT1	ANXA9	CA12	CAMKK2	TNNC2	ATP7A	IFI44	IFIT3	DLG1	PKHD1	SCG2	SERPINE1	HSP90B1	MAP2K6	PGK1	CKS2	SNRPA1	PES1	COL1A1	CCL20	GSTA3	ACOT8	UQCRC1	PFKP	GCLC	FAS	HSPA2	MMP16	STC1	GYPB	F10	TNFRSF4	HSD17B4	ECH1	CD3E	DPEP3	RBP4	PDE6B	PCSK1
PTGS2	ENO2	SQLE	ARF6	AXIN2	BMPR2	SOCS3	POLR2F	BIRC5	BIRC3	CCND1	LPL	IGFBP4	PDZK1	NKX3-1	MYH3	COPB1	IFI35	IFI35	TJP1	ATP6V0A4	AMOT	MMP14	XBP1	MAPK9	SLC7A5	DCLRE1B	RAN	TFB2M	FN1	IL1A	CYP2J2	ACOX1	NDUFA9	ERO1A	CAT	TOB1	POLR2H	ABCC1	LPL	ALAD	PLG	SOCS1	AKR1D1	ECI2	CD3D	ADAM2	HSD11B1	SIDT1	NKX6-1
CXCL1	PGM1	HMGCS1	MYO9B	PSEN2	SKIL	STAT3	POLR2C	CDC20	PMAIP1	FZD1	CPT2	SYBU	ANXA9	TMPRSS2	MYLPF	LAMP2	IRF7	IRF7	COL17A1	CRYBG1	UNC5C	SERPING1	EXOSC9	AKT1	CTSC	DNMT1	SRSF2	EXOSC5	COL6A3	CXCL8	CYP27A1	ACSL1	NDUFS4	ALDOB	GPX4	GADD45A	ALAS1	MAP2K5	VEGFA	RHD	C1R	TNFRSF9	ABCD2	EHHADH	CD28	ACTL7B	ETV4	NTF3	SLC2A2
IER3	NDRG1	NSDHL	MYH9	FZD1	SKI	OSMR	POLR2K	PLK1	CASP8	PSEN2	CD36	NPY1R	CELSR2	APPBP2	TNNT3	EGFR	RSAD2	IFIT2	NECTIN1	SHROOM2	ADGRG1	CTSL	HSPA5	MAPK1	ACSL3	DONSON	G3BP1	IPO4	SERPINE1	CCL7	ADH1C	ALDH3A2	NDUFS1	VEGFA	MPO	PHLDA3	TUBA4A	AGGF1	PF4	GYPA	SERPINE1	XBP1	PEX1	GSTK1	LYN	GAPDHS	GLRX	SCN10A	SEC11A
CD83	HK2	LSS	TUBGCP3	NOTCH4	ACVR1	IL2RG	GTF2H3	TTK	JUN	FZD7	GPAM	PDZK1	TJP3	CENPN	TNNT2	IGF2R	IFI44L	OAS2	CLDN9	SRPX	HEY1	F5	ATF3	PLCG1	SLC1A5	EED	STARD7	NDUFAF4	COL1A2	CCL22	UGDH	CCDC58	NDUFA2	MXI1	PRDX1	TAP1	C4BPB	PLCB4	THBD	SELENBP1	SERPING1	RRAGD	CYP8B1	HSD17B4	HCLS1	TUBA3C	DUSP6	TAS2R4	DCX
CCL20	ALDOC	MVD	CKAP5	LEF1	PMEPA1	IFNGR1	POLR2D	PRC1	BCL2L11	DTX1	ADIPOR2	NRIP1	PGR	BMPR1B	CASQ2	COPE	IFITM1	TAP1	CDH3	MDGA1	GLI1	MMP13	EXOSC1	TRIB3	M6PR	GINS1	NPM1	NOC4L	COL4A1	CXCL11	ASL	CPT2	NDUFS8	PKM	PRDX6	CDKN2B	CCNE1	MET	FGFR1	BLVRB	C2	HK2	PNPLA8	MLYCD	IL18	LDHC	SCG5	DTNB	SPCS1
CXCL3	GPI	LDLR	RACGAP1	AXIN1	NCOR2	TYK2	ERCC3	NDC80	MCL1	DLL1	ACAA2	MLPH	RET	MAF	ACTC1	PPT1	IFI27	EIF2AK2	CTNND1	TMEM8B	THY1	F7	EXOSC5	GSK3B	TFRC	GINS4	BUB3	MYC	COL4A2	CCR7	NQO1	CYP4A11	SDHB	HK2	GCLM	SFN	EPHX1	IRS1	TNFRSF21	GYPE	F12	PHLDA1	PHYH	PEX11A	CRTAM	DDX25	ETV5	HTR1D	FOXA2
MAFF	MXI1	TM7SF2	PREX1	NKD1	SERPINE1	IL13RA1	DDB2	KIF11	IL1B	FZD5	ETFB	HSPB8	MYB	FADS1	MYOM1	AP3S1	IRF9	RSAD2	CDH1	THY1	SLIT1	CTSS	ASNS	MAP2K3	DDIT3	H2AZ1	EIF3D	SRM	VCAN	EDN1	ALAS1	DECR1	NNT	LDHA	TXN	ZMAT3	GRPEL1	PTPRM	CCND2	GYPC	CFI	IL2RB	SLC27A5	RETSAT	IFNG	PRM2	ITGB2	MAST3	GCK
NFKB2	SLC2A1	ALDOC	ARHGEF3	WNT5B	JUNB	TLR2	POLR1C	NUSAP1	SPTAN1	MAML2	ACOX1	EGR3	TPBG	ZBTB10	MYL4	BET1	OASL	MX2	LIMA1	PCSK9	CDK6	LGMN	ARFGAP1	CDKN1A	TMEM97	LIG1	XPO1	PA2G4	IGFBP3	CD40	GSTM4	ECH1	ATP5PO	EXT1	SOD2	DDB2	ICAM1	AKT3	COL5A2	EPB42	MMP2	CTLA4	CYP7B1	SLC27A2	CD3G	TCP11	AKT2	SLC6A3	MAFB
TNFAIP2	P4HA1	EBP	NUMA1	CUL1	SMAD1	IFNGR2	XPC	CKS2	DIABLO	NOTCH1	ACADM	KRT19	EGR3	HMGCR	MYBPH	CLCN3	EIF2AK2	IRF1	VCL	EPHB4	HEY2	PLG	WFS1	RAC1	IFRD1	MAD2L1	FBL	GNL3	TGFBI	CXCL9	CYP2C18	ECI1	ATP5MC3	SLC25A10	PRDX4	EI24	FEN1	SIPA1L1	ITGAV	SLC4A1	C3	NFIL3	CYP27A1	PEX13	CD86	PIAS2	PPBP	CLDN8	INS
HBEGF	ADM	SCD	SPTBN1	JAG1	SMAD6	IL10RB	PCNA	KIF2C	BAX	PSENEN	HADH	LRIG1	ARL3	SPCS3	MYH7	AP2S1	IFIT2	OAS3	SHROOM2	DCBLD2	NRP2	C1QA	SRPRB	RIPK1	PLOD2	MCM2	EIF4A1	NOLC1	SPARC	IL6	PTS	ELOVL5	NDUFS7	GUSB	SELENOS	PERP	ARRB2	NR1D2	SERPINA5	RHCE	F9	CD83	PEX26	PEX14	IL10	PAPOLB	G0S2	TGM1	PDX1
KLF6	P4HA2	PMVK	KIF2C	MAML1	PPP1R15A	IL6	POLR2I	MKI67	BIK	WNT5A	IDH1	KDM4B	OLFM1	INSIG1	MYH8	CLTC	CXCL10	TNFSF10	NECTIN3	GHRL	TLE3	CASP1	DNAJB9	AKT1S1	TUBA4A	MCM4	CANX	WDR43	LUM	IL1B	CYB5A	FABP1	ATP5F1A	PFKFB1	PDLIM1	DDIT4	JUNB	ATRN	KCNJ8	RHAG	CTSO	IKZF2	AGXT	SCP2	UBE2N	OAZ3	GABRA3	PCDHB1	ABCC8
BIRC3	ENO1	MVK	KIF5B	KAT2A	TGIF1	IL1R2	SUPT4H1	AURKB	IL1A	CUL1	SORBS1	PGR	NPY1R	NGLY1	ACTN2	AP2M1	TAP1	IRF9	NECTIN2	LYN	TLE1	GZMA	TSPYL2	ACTR2	PSAT1	MCM5	NAP1L1	RABEPK	LAMC1	TLR2	ACOX2	FABP2	NDUFV1	PGAM1	TXNRD2	ATF3	CTSV	ANXA2	APP	TAL1	TMPRSS6	IL10	PEX7	HSD3B7	BCL10	PHF7	IRF8	THRB	IAPP
PLAUR	PFKP	LPL	TTK	GNAI1	FURIN	IL3RA	POLD3	TPX2	BID	WNT2	ACADS	RHOBTB3	SCNN1A	UBE2J1	TNNI1	RER1	SP110	CXCL10	CLDN14	GAS1	L1CAM	ADAM9	NFYA	PRKAR2A	CORO1A	MCM7	CBX3	NOP16	LOX	IL1R1	EPHX1	HADH	COX5B	PYGB	LAMTOR5	BAX	DGAT1	ADD3	JAG1	MARCHF8	MMP9	TNFRSF18	CROT	GNPAT	CD4	ODF1	BIRC3	YPEL1	SRP9
ZFP36	AK4	SC5D	APC	WNT6	SMAD3	IFNAR1	POLR3GL	SMC4	CDKN1A	DTX4	UCK1	TPD52L1	XBP1	ELK4	CRYAB	KIF1B	DDX60	IFI44	PTPRC	FLOT2	PLG	CALM3	CALR	YWHAB	LDHA	MELK	CCT3	TBRG4	LAMC2	CD69	LCAT	HIBCH	UQCRH	AK4	G6PD	SESN1	ATF3	CDKN1B	COL3A1	SPTB	PROZ	DHRS3	CYP39A1	ABCD2	LCK	ACRBP	FGF9	RYR2	NEUROG3
ICAM1	FAM162A	FADS2	CEP250	PTCH1	FKBP1A	TNFRSF1A	POLR3C	BUB1	GADD45A	SAP30	SCP2	ELOVL2	AREG	ABCC4	SGCG	ARF1	UBE2L6	BST2	THY1	PLAUR	NKX6-1	C1QC	KHSRP	HRAS	MTHFD2	MMS22L	C1QBP	DDX18	CCN2	ICAM1	SLC35D1	HMGCL	NDUFA1	P4HA1	MSRA	FDXR	CASP3	ATXN1	SPP1	UROD	MMP1	ECM1	ABCA3	SLC25A17	NCK1	YBX2	DCBLD2	GDNF	FOXO1
JUN	PFKFB3	HMGCR	PAFAH1B1	NCOR2	MAP3K7	MYD88	GTF2B	CENPF	DDIT3	PPARD	DECR1	RET	IL17RB	ELOVL5	HRC	OCRL	USP18	XAF1	VASP	AKAP7	NF1	TIMP1	DNAJC3	PDK1	FADS2	NAA38	U2AF1	NIP7	TAGLN	CCRL2	GSS	HSD17B11	ATP5F1C	PMM2	MBP	PIDD1	RASGRP1	CAP2	NRP1	HBQ1	CFB	ADAM19	CYP7A1	PEX2	C2	CSNK2A2	INHBA	CAMK1D	AKT3
EGR3	VEGFA	HSD17B7	CDC42EP2	DKK4	BMPR1A	ACVR1B	POLR1D	RACGAP1	CDKN1B	KAT2A	CDKN2C	TPBG	NRIP1	ALDH1A3	TNNT1	ICA1	PSMB8	SP110	ITGB1	ATP8B1	RASA1	DPP4	EXOSC2	PIKFYVE	VLDLR	NASP	UBE2L3	WDR74	COL7A1	AQP9	FMO3	IDH1	ATP5F1B	FAM162A	SRXN1	SAT1	TMBIM6	PRDM2	OLR1	DCAF11	BMP1	SLC2A3	HACL1	ACAA1	HLA-A	NAA11	TFPI	AMBN	GCG
IL1B	BNIP3L	ANXA13	KIF3B	HDAC2	CTNNB1	CSF3R	NCBP2	CENPE	TNF	HEYL	TALDO1	TFF1	ASS1	AZGP1	DES	MON2	IFIH1	OASL	ZYX	EFNA5	ETS2	KLK1	NOP14	TBK1	WARS1	NUDT21	SSBP1	BYSL	LOXL2	EREG	IDH1	ME1	COX7B	SDC1	NQO1	CDKN2A	FOS	TOGARAM1	PDGFA	ERMAP	VWF	HIPK2	PIPOX	HAO2	ITGB2	TULP2	TSPAN1	LFNG	DPP4
BCL2A1	TPI1	SREBF2	CCDC88A	DKK1	HIPK2	ITGB3	NELFE	KIF23	GSN	SKP1	TST	MAPT	TFF3	ABHD2	MYOZ1	ARFGEF2	BST2	PSMB8	ACTN4	SLC34A3	RTN1	KLKB1	ATF6	ACTR3	SCD	NUP205	SRSF1	HSPD1	COL6A2	C3AR1	AKR1C3	MGLL	SDHD	EGLN3	OXSR1	AEN	TAP1	SDC2	PTK2	EIF2AK1	FGA	BATF3	PEX6	HSD17B11	HLA-DQA1	ADAD1	ADAM8	SERPINA10	PAX4
PPP1R15A	ERO1A	PCYT2	KIF15	TCF7	KLF10	REG1A	GTF2F1	UBE2C	TNFSF10	RBX1	MCCC1	SCNN1A	FKBP4	SAT1	RYR1	TMED2	LGALS3BP	IFI44L	CLDN4	APP	CRMP1	CD59	HYOU1	E2F1	P4HA1	ORC6	TCP1	PLK4	ITGAV	GNA15	SLC22A1	MLYCD	CYCS	PC	GLRX2	PPM1D	E2F5	SMAD3	SLCO2A1	CPOX	F11	BHLHE40	SOD1	CRAT	CD1D	SYCP1	SLPI	ALOX12B	SYT13
ZC3H12A	KDM3A	ACSS2	BIRC5	WNT1	BMP2	CXCL1	ERCC5	MCM6	CASP6	TCF7L2	PGM1	ABAT	SLC27A2	DBI	CSRP3	NAPG	ADAR	IFITM3	CADM3	GSTM3	MYH9	CR2	RRP9	MYD88	ACTR2	PCNA	MCM2	NOP2	THBS2	CMKLR1	GSTO1	PCBD1	NDUFA6	B4GALT7	HMOX2	FOXO3	RAB27A	SLC7A1	PGLYRP1	MPP1	THBD	PTGER2	GNPAT	PEX11B	CD80	DDX4	PRKG2	CALCB	SCGN
SOD2	CCNG2	ATF3	CNTROB	NUMB	ENG	A2M	LIG1	MCM3	SQSTM1	ARRB1	REEP5	FLNB	SEMA3B	DHCR24	ADAM12	TMX1	ISG20	DDX60	ITGA3	HSPB1	VEGFA	MMP15	NOP56	ITPR2	IDH1	PLK4	EIF3B	PPAN	COL16A1	PTGER4	ARG1	RETSAT	NDUFAB1	FBP2	FES	BTG1	CCND3	GCNT1	VAV2	GLRX5	FURIN	DENND5A	HSD3B1	LONP2	HLA-DRA	MLF1	MMP11	FGGY	HNF1A
NR4A2	LDHA	ADH4	NF1	ADAM17	APC	CSF2RA	ERCC1	PTTG1	FASLG	LFNG	BCL2L13	XBP1	GPER1	SORD	ATP2A1	PAM	GBP2	LGALS3BP	NF2	SLC2A4	CELSR1	LAP3	CXXC1	SQSTM1	SLC2A1	POLE	PSMD14	NOP56	NNMT	LIF	CDO1	S100A10	COX8A	IGFBP3	PFKP	TXNIP	SLC25A4	RUNX1	S100A4	TSPAN5	MMP11	ITIH5	ABCA2	IDH1	THY1	TEKT2	MMP10	SPRR3	STXBP1
IL1A	GYS1	ETHE1	TSC1	DVL2	PPM1A	IL15RA	ERCC4	CDK1	EGR3	PRKCA	SLC25A10	CELSR2	LLGL2	STK39	CKM	SCAMP1	IRF1	GBP4	B4GALT1	IL2RB	CNTFR	SPOCK2	IGFBP1	RPS6KA1	GBE1	PRIM2	SNRPA	RCL1	TPM1	IL15	FMO1	SUCLG1	ACO2	CHPF	NDUFB4	SLC19A2	SPR	RND3	MSX1	OSBP2	F8	PHTF2	HAO1	FIS1	TLR1	SPATA6	TMEM158	ATP6V1B1	CHGA
RELB	GAPDH	ECH1	CDC27	PPARD	XIAP	IRF9	POLD4	KIF4A	CD44	DTX2	ME1	RAB31	AGR2	TPD52	SVIL	SH3GL2	PLSCR1	IRF8	NEXN	RTN4RL1	ACHE	F10	CNOT4	PTPN11	SERPINH1	RAD51AP1	PWP1	NPM1	CDH2	NAMPT	ALDH9A1	VNN1	ATP5MC1	B3GAT3	GPX3	IER3	CDKN2B	PLPP3	VTN	ANK1	LGMN	GADD45B	PEX16	PEX6	HLA-G	PGK2	TNFAIP3	EDN1	VDR
TRAF1	BHLHE40	CBS	CNTRL	NCSTN	CDH1	PDGFC	NELFB	ESPL1	FAS	ST3GAL6	PHYH	MYBL1	KRT19	IDI1	MYOM2	RAB2A	PSMB9	PSMB9	CDH6	NCOA6	PML	CTSB	DCP2	MAPKAP1	NUPR1	RFC2	APEX1	AIMP2	MMP2	OPRK1	POR	EHHADH	CYC1	CHST12	SCAF4	TP53	SHOX2	NR3C1	TIMP1	NFE2	HPN	NRP1	ABCD1	ABCB4	HLA-DMB	HSPA2	PRDM1	UPK3B	PCSK2
BTG2	ANGPTL4	GUSB	TUBGCP5	HDAC5	ID1	HAX1	RFC2	MAD2L1	IL18	FBXW11	PIM3	MREG	CCN5	B2M	MYL6B	COG2	HERC6	PML	ADAM15	SULF2	CDK5R1	SERPINA1	PDIA6	PLCB1	PSMG1	RPA2	TXNL4A	RRP12	COL11A1	ITGB8	NDRG2	ALDH9A1	NDUFB6	HS2ST1	CDKN2D	NOTCH1	OLFM1	YTHDC1	APOH	AHSP	CTSB	NCOA3	ACSL1	SOD1	IL7	ACRV1	GALNT3	GAMT	INSM1
DUSP1	JUN	FASN	KIF4A	CCND2	LEFTY2	BAK1	ELL	NEK2	IGFBP6		YWHAG	FAM102A	BLVRB	MAP7	TPM2	VAMP3	SAMD9	IFIH1	PTK2	ADAM10	VLDLR	CTSO	ATP6V0D1	RAF1	PSPH	RPA3	HNRNPR	PPRC1	THBS1	PTAFR	UPB1	HADHB	ATP5F1E	MPI	MGST1	RRAD	IGFBP2	PPARG	PRG2	SPTA1	MBL2	CD79B	MLYCD	ABCB1	IL4	CLPB	ETS1	PRODH	SST
MAP3K8	SERPINE1	LGALS3	MAPRE1	FRAT1	CDKN1C	EBI3	TAF10	KIF22	PRF1		NDUFAB1	MSMB	FLNB	DNAJB9	MYL2	ERGIC3	CMPK2	UBE2L6	HADH	BRCA1	OPHN1	CD40LG	PREB	CAMK4	NAMPT	SUV39H1	PSMB2	TCOF1	FAP	ADM	ECH1	ECHS1	COX5A	GNPDA1	ABCC1	DCXR	LYN	ADGRL2	JAG2	MAP2K3	F13B	AHR	ABCG8	ISOC1	TNF	CRISP2	MMP9	RYR1	ELP4
ETS2	LOX	ATF5	FGD6	CSNK1E	TRIM33	INHBE	RRM2B	HMMR	DAP		GPD2	STC2	PDCD4	FKBP5	CKMT2	DOP1A	IFITM3	IFI27	LAMB3	GATA3	LDB1	CBLB	SEC31A	RPTOR	CDKN1A	TMPO	HPRT1	MCM5	BGN	PLAUR	PTGES	ACADS	UQCRC2	AKR1A1	FTL	NINJ1	CLTB	DLG1	LUM	BNIP3L	TIMP1	TNFRSF1B	AQP9	YWHAH	CD247	ZC2HC1C	WNT7A	GPR19	SRPRB
F3	GCK	ANXA5	BRCA2	RBPJ	RAB31	CRLF2	SUPT5H	KPNA2	CCND1		ADIG	RETREG1	CALCR	HERC3	BIN1	VAMP4	RTP4	ADAR	CLDN11	AFAP1L2	DPYSL2	PDP1	GOSR2	CFL1	BHLHE40	UBE2T	MCM6	HK2	SERPINH1	NFKB1	PDK4	CA2	COX6A1	PPFIA4	ATOX1	FOS	BCL2L11	ATP2B4	CXCL6	SLC22A4	CTSV	NDRG1	ISOC1	EPHX2	IL2	AKAP4	IGFBP3	SLC29A3	PAK3
SDC4	PPFIA4	TP53INP1	PLK1	FZD8	TJP1	TNFRSF1B	RPA3	CDKN3	BTG3		ECHS1	SIAH2	IGFBP4	PGM3	MYH1	VPS4B	STAT2	LY6E	CDH4	IL2RG		C4BPB	SERP1	CDK4	HSPA9	WDR90	NME1	CBX3	FSTL1	INHBA	AHCY	HSD17B10	ATP5F1D	B3GAT1	STK25	S100A10	LHX2	NIPBL		CLIC2	MMP8	BCL2L1	NR1H4	ABCD1	HLA-DMA	CCNA1	SPP1	EDN2	G6PC2
EGR1	MAFF	CHKA	RASA1	TP53	SLC20A1	CD14	SNAPC5	CDC25A	F2R		QDPR	ZNF185	DNAJC12	HOMER2	ENO3	NAPA	SAMD9L	STAT2	IRS1	CD160		PLEK	NFYB	TRAF2	HSPA5	CDK1	SNRPD1	PLK1	POSTN	OSM	COMT	ALDH1A1	COX6C	CHPF2	EGLN2	FBXW7	NFKBIA	PEX14		TRAK2	A2M	GABARAPL1	PEX19	HMGCL	STAT1	CCT6B	ETV1	GPRC5C	PKLR
IL6	DDIT4	GSTM2	NEK2	SKP2	CDK9	PTPN1	SSRP1	H2AX	SATB1		CS	SLC19A2	TIAM1	ELL2	FLII	GNAS	LY6E	CXCL9	SORBS3	ADIPOR2		GP9	NHP2	GNGT1	EGLN3	MCM3	EEF1B2	PHB	THY1	TNFSF10	AOX1	ACADVL	ATP5PF	G6PD	ERCC2	PLK3	MSX1	MYC		GCLC	MMP10	LIF	NPC1	ACSL5	IRF4	PACRG	CLEC4A	C5	LMO2
TNF	SLC2A3	ACAT2	WASF1	HEY2	ID3	PTPN2	RFC3	CDC25B	BNIP3L		ECH1	SLC1A4	TSPAN13	UAP1	FXYD1	STX7	IFITM2	IL10RA	CLDN8	SLC22A12		PLAUR	DCTN1	UBE2N	LGMN	TOP2A	HSPD1	MCM4	SPP1	TNFSF15	CFB	HSD17B4	NDUFB3	MDH2	SBNO2	XPC	H2AX	RASA2		KEL	MASP2	TIAM1	HSD17B11	ALDH9A1	SRGN	GSG1	CCND2	ZC2HC1C	SRP14
KDM6B	IGFBP3	AVPR1A	TOP2A	HEY1	NOG	IL1B	RPA2	PLK4	CASP4		SLC25A1	FHL2	CXCL12	SEC24D	TPM3	SEC22B	HELZ2	PLA2G4A	EVL	NTNG1		C3	SLC7A5	ADCY2	PNP	MCM6	CAD	CDK4	TNC	IFNGR2	DDAH2	CA4	IDH3B	CHST6	JUNB	AK1	NR4A1	FZD2		RANBP10	FGG	BMPR2	AMACR	DHCR24	INHBA	THEG	TSPAN7	EDAR
NFKB1	NFIL3	PLSCR1	TRIO	HDAC11	ARID4B	CSF1	ELOA	CDC6	TNFRSF12A		ACADL	BCL2	RAB31	LMAN1	DMD	VPS45	CXCL11	TRIM21	CLDN15	SCUBE1		F2	SSR1	CDKN1B	XBP1	BIRC5	RPL18	DUSP2	TFPI2	ADGRE1	HGFAC	ADH1C	OGDH	PGLS	PTPA	TRIAP1	GLS	BMPR1A		TRIM10	C8A	MAP3K8	CYP46A1	ELOVL5	TLR3	HSPA4L	ITGBL1	KCNMB1
LIF	FOS	CLU	ARHGEF11		IFNGR2	IL18R1	TAF12	CCNF	CREBBP		TOB1	PMAIP1	PKP3	PMEPA1	IGFBP3	STX16	TRIM21	USP18	THBS3	CX3CL1		CASP4	EDEM1	VAV3	SLA	CCNB2	PGK1	MYBBP1A	NID2	IL12B	F11	ADH7	NDUFB8	PGAM2	LSP1	BAK1	CDC34	LPAR1		TSPO2	PLAU	RHOB	PEX13	NUDT19	ZAP70	CST8	EMP1	TENT5C
PTX3	RBPJ	ERRFI1	KATNB1		ID2	TNF	NELFCD	MCM5	RHOB		GRPEL1	AREG	CYP26B1	INPP4B	CHRNB1	YKT6	PARP14	PTGS2	NECTIN4	CROCC		STX4	EDC4	FGF6	DDX39A	RRM2	DDX18	UTP20	ITGB5	CSF1	CYP26A1	PTS	SURF1	CHST1	NDUFA6	CCND2	MMP14	PRKCA		UROS	ADAM9	MYC	IDH1	PRDX5	CD74	DCC	CDADC1	STAG3
FOSL1	HK1	TRIB3	PRC1		PPP1CA	PF4	TAF13	LMNB1	GPX3		CRAT	OVOL2	FKBP5	RRP12	SPEG	SNX2	TRIM26	EPSTI1	JAM3			CTSC	EIF2AK3	ECSIT	HSPE1	HMGB2	RPS2	PRMT3	MMP3	CXCL6	MCCC2	MAOA	COX6B1	GPC1	HHEX	APAF1	STK25	MGMT		XK	GSN	S100A1	PEX11A	CTPS1	CD40	HSPA1L	KIF5C	KRT4
NR4A1	CITED2	CXCL16	ANLN		SPTBN1	CXCL13	TAF6	E2F3	PDGFRB		GBE1	TSKU	SIAH2	SELENOP	FHL1	ARFGEF1	PARP12	C1S	CDH11			USP15	MTHFD2	RALB	ACLY	BUB1B	LDHA	FARSA	VIM	TNFRSF9	SERPINA6	HAO2	NDUFB5	TSTA3	GLRX	PDGFA	PDAP1	PRKCE		SNCA	CAPN2	ETFBKMT	HSD17B6	IDE	TRAF2	GSTM3	TRIB2	SLC25A23
JAG1	ISG20	TNFRSF12A	CDK5RAP2		WWTR1	LTBR	TAF9	KIF15	TSPO		CAVIN2	ADCY9	ISG20	NDRG1	ACTN3	CLTA	NMI	DDX58	ITGB4			CR1	SRPRA	ARF1	SLC7A11	RFC3	RUVBL2	MAP3K6	LOXL1	LYN	GNMT	HSD17B7	NDUFA4	ALG1	NDUFS2	NDRG1	ABCB1	RXRA		MARK3	PLAT	CAPG	EPHX2	SLC23A2	B2M	DNAJB8	SDCCAG8	INSL5
CCL4	GALK1	ACTG1	SMC3		BCAR3	FAS	GTF2A2	CHEK1	CCND2		SCARB1	RASGRP1	TMPRSS3	KRT19	TCAP	CLN5	RNF31	IL15	RASA1			DUSP6	NOLC1	MKNK1	SSR1	EZH2	RNPS1	LAS1L	FBLN5	ACVR2A	BLVRB	MCEE	NDUFB1	GFPT1	PRNP	RALGDS	BSG	LTBP1		UBAC1	FN1	ST3GAL4	PRDX5	PEX5	BCL3	IL13RA2	PCP4	GP1BA
GCH1	WSB1	JAG1	TUBGCP2		THBS1	IL17RA	VPS37D	UBE2S	XIAP		PEMT	MUC1	SERPINA3	ITGAV	MYLK	M6PR	HLA-C	NLRC5	AKT2			SERPINB2	ERN1	CDK1	GLA	CHEK1	EIF2S1	PUS1	COL12A1	LDLR	HACL1	ACAT2	COX4I1	PRPS1	IPCEF1	SERPINB5	SELENOW	LDLR		CA1	CTSH	PENK	PXMP2	BCL10	LTB	CAMK4	CFHR2	KMT2D
CCL2	PYGM	LGMN	ESPL1		FNTA	CXCL10	NME1	NSD2	TIMP1		CHCHD10	KAZN	WFS1	B4GALT1	MYL3	SGMS1	CASP1	NMI	TMEM8B			GPD2	FKBP14	PTEN	SQSTM1	SMC4	RANBP1	HSPE1	ELN	BDKRB1	MAOA	AUH	COX7C	GOT1		DGKA	IRF1	RBPMS		CA2	OLR1	IRF4	BBOX1	NR1I2	IFNGR1	LPIN1	ALDH1A2	ABCG4
RCAN1	STC1	FBXO6	MAP1S		HDAC1	IL9R	RNMT	HMGB3	CTNNB1		AK2	SLC27A2	MAPT	MAK	PYGM	USO1	TRIM14	IDO1	LAMA3			CFH	ZBTB17	ARHGDIA	PDK1	MKI67	MCM5	SLC29A2	CDH11	HRH1	KYNU	HPGD	UQCRFS1	MDH1		CYFIP2	RXRB	CACNA1A		BSG	SPARC	CST7	FADS2	TSPO	CCR5	ZC3H14	NR0B2	MYH7
DUSP2	ZNF292	GPX8	ARHGAP27		UBE2D3	STAM2	ERCC2	DBF4	IRF1		APOE	FKBP4	PDLIM3	SPDEF	LDB3	TSG101	TDRD7	PSMB10	RSU1			FN1	WIPI1	GRK2	PSMC2	CDC20	IARS1	DCTPP1	COMP	F3	DHPS	FH	SDHC	SLC35A3		KLF4	TFRC	RGS4		FOXO3	RGN	WLS	ALDH9A1	CNBP	CD40LG	COIL	ALDH1A3	BRDT
EHD1	BTG1	PNRC1	DOCK4		LTBP2	TNFRSF12A	POLE4	TACC3	HSPB1		UQCR10	CXCL12	RBBP8	GSR	COX6A2	DNM1L	DHX58	CXCL11	ICAM1			CD36	YIF1A	FGF17	PRDX1	PLK1	UBE2E1	SUPV3L1	SPOCK1	BST2	SERPINE1	HMGCS2	ATP6V1F	GALK1		IP6K2	PPIF	COL5A2		KLF1	C8B	TLR7	APOA1	MSH2	HLA-DOA	PHKG2	AMMECR1	PTGFR
IER2	PLIN2	ANTXR2	SAC3D1		RHOA	STAT2	VPS37B	MCM2	ADD1		TANK	TMPRSS3	GJB3	KRT8	FABP3	LMAN1	PARP9	ITGB7	CLDN18			CA2	CCL2	DDIT3	SERP1	KIF2C	MYC	SORD	BMP1	PTGIR	SLC6A12	ALAD	COX7A2	EGFR		ADA	CDKN1C	PTPN21		CDC27	LAMP2	IKZF4	OPTN	DHRS3	GLMN	KIF2C	SATB1	KCNN1
REL	CSRP2	MAL2	INCENP			HMOX1	NT5C3A	CDKN2C	TIMP2		ANGPTL4	RARA	PRLR	LIFR	MYL7	YIPF6	PNPT1	SAMHD1	GTF2F1			PSMB9	DKC1	AC093012.1	TRIB3	DLGAP5	AP3S1	IMP4	IL32	CD55	GCH1	GPD1	SUCLG1	ANGPTL4		TNFSF9	HLA-F	PRKAR2B		KAT2B	C9	GBP4	GSTK1	DIO1	IL6	RPL39L	GUCY1A1	SELENOP
CFLAR	VLDLR	CD9	ARHGAP5			LEPR	SNAPC4	CDKN1B	BTG2		ACO2	IL17RB	SLC1A4	PLPP1	ITGB5	ARFIP1	TRIM25	HERC6	TSC1			APOBEC3G	EIF4EBP1	TIAM1	NFIL3	AURKB	RFC4	GRWD1	LAMA3	CALCRL	DHRS7	ACO2	NDUFS6	CITED2		KLK8	CREG1	GJA1		NARF	PROS1	RGS16	ABCG4	SLC25A4	HLA-E	SLC2A5	CSF2	IFI44L
RIPK2	JMJD6	PPARG	GSN			CBL	AAAS	FANCC	TIMP3		FAH	CBFA2T3	FOS	STEAP4	CHRNA1	ANP32E	PSME1	CMPK2	LAMC2			FCN1	EIF4A1	CDK2	HMGCS1	CDC25A	DUT	UNG	TIMP1	CSF3	PAPSS2	CBR1	NDUFA7	PLOD2		PRKAB1	APOM	BCKDHB		GCLM	CLU	SPP1	ALDH8A1	PRDX1	CD2	PCSK4	APOD	PROP1
NFKBIE	EXT1	GLDC	NET1			CD9	ZNRD1	NASP	LEF1		ACLY	TFF3	PLAAT3	GUCY1A1	SSPN	TSPAN8	WARS1	SAMD9L	NRAP			GZMK	EIF2S1	SFN	GOT1	TRIP13	PSMA4	MPHOSPH10	QSOX1	GPR132	ALDH2	GRHPR	FH	QSOX1		STOM	BMP2	DMAC2L		FBXO7	F2RL2	IL13	NR3C2	IDI1	CCL5	AURKA	TOR1AIP2	LGALS7
NR4A3	F3	STX5	LRPPRC			CXCL3	RFC4	STAG1	CASP1		IFNGR1	UGCG	SLC7A5	SRP19	COL3A1	DST	EPSTI1	RTP4	CTNNA1			PDGFB	TATDN2	PRKCB	TPI1	H2AX	RPS3		TIMP3	IL4R	HSD11B1	ACOT2	NDUFV2	ME2		SOCS1	TGFBRAP1	SERPINE1		H1-0	CD9	SLC29A2	ABCA6	HRAS	FAS	MLLT10	CMKLR1	BMPR1B
PHLDA1	PDK3	STARD4	RABGAP1			TGFB1	ITPA	GINS2	GPX1		SLC5A6	CCND1	SERPINA5	CCND3	KCNH1	SCRN1	UBA7	PTPN2	CD99			CLU	XPOT	GNA14	ELOVL6	HMMR	SNRPG		VCAM1	NLRP3	SLC35B1	G0S2	OXA1L	SPAG4		PLK2	NAT1	AMPH		HEBP1	CFH	NFKBIZ	RETSAT	MVP	FASLG	NOS1	TMEM176B	PDK2
IER5	ANKZF1	CTNNB1	FLNB			MAP3K8	POM121	FBXO5	BCL10		JAGN1	SLC22A5	IMPA2	IQGAP2	GJA5	SEC31A	PSME2	PARP14	FSCN1			CASP10	LSM4	EIF4E	ASNS	E2F8	PHB2		CCN1	IL15RA	KARS1	MDH2	NDUFC1	P4HA2		CASP1	CYB5R1	MIOS		HBD	PREP	IL4R	FADS1	ABCC8	TLR6	ART3	ADGRA2	DCC
TNFSF9	UGP2	TMEM97	ARAP3			ITGA4	BRF2	POLQ	IGF2R		EPHX2	WFS1	DHCR7	RAB4A	MYF6	VAMP7	B2M	TNFAIP2	COL16A1			LRP1	CHAC1	CLTC	PSMD14	BRCA1	SSB		EDIL3	ADORA2B	CA2	HSP90AA1	UQCR11	GAPDHS		RCHY1	RRAD	CITED2		NUDT4	LTA4H	MXD1	PECR	CLN6	PF4	CCNB2	LAPTM5	SNCB
GEM	ALDOB	NIBAN1	FGD4			CD38	RFC5	EZH2	CDC25B		IDH3G	PTGES	MYOF	SLC26A2	MYH2	SCAMP3	TRIM5	IFITM2	GNAI2			CTSD	STC2	TSC2	PSMA4	MYBL2	EIF4H		CALD1	GCH1	LPIN2	BCKDHB	NDUFA5	ENO2		PCNA	POLE3	COL1A2		FBXO9	GP9	CSF2	PEX12	CAT	TGFB2	NPHP1	CD37	COL2A1
GADD45A	STC2	PDK3	ABR			JUN	SAC3D1	RAD21	AIFM3		GPX3	WWC1	CDH1	SMS	MAPK12	AP2B1	C1S	PLSCR1	TGFBI			S100A9	PDIA5	FGF22	PPA1	POLD1	SRSF3		MAGEE1	OLR1	CAT	UROS	CS	GOT2		RPS27L	IL6	INSIG1		RAD23A	DUSP14	FAH	CAT	ACSL4	CD79A	CLGN	CAB39L	UGT2B17
CXCL10	ERRFI1	PLAUR	CENPJ			SOCS1	CLP1	STMN1	CD38		ELMOD3	CCN5	EMP2	ZMIZ1	PGAM2	RAB22A	LAP3	SOCS1	MPP5			WAS	NABP1	PPP1CA	HPRT1	RACGAP1	CCT4		FBLN1	PTGER2	CYP2S1	YWHAH	ATP6V1G1	EXT2		RB1	YKT6	FYN		CROCCP2	CTSK	CTSZ	GNMT	IDH2	INHBB	MAST2	CIDEA	NPY4R
PLK2	ENO3	SEMA3B	NCK1			ACVRL1	NME4	SUV39H1	PPP3R1		ORM1	MYC	OVOL2	SGK1	MYOG	AP3B1	LAMP3	CASP1	JUP			BRPF3	LSM1	DUSP3	AURKA	CKS1B	TFDP1		SGCB	CSF3R	RAP1GAP	LDHA	ATP5PB	SLC25A13		PPP1R15A	ACAA1	WDR37		TMCC2	GDA	ITGAE	ABCA9	ABCC5	ELANE	MTOR	ZNF639	DLK2
BHLHE40	PNRC1	GNAI1	CENPF			PIM1	PRIM1	PRIM2	HGF		RETSAT	ITPK1	DLG5	MERTK	MYH4	TPD52	GBP4	ICAM1	ACTN2			PLAT	SDAD1	HSP90B1	HMGCR	KPNA2	EIF2S2		ECM1	MYC	FBP1	CRYZ	HCCS	HMMR		POLH	CLCN2	ZMIZ1		BLVRA	CASP9	MUC1	ACSL5	SOD2	SPI1	CDKN3	IL1B	WNT16
EGR2	HMOX1	ABCA2	KIF20B			TNFRSF21	VPS28	E2F1	CLU		ESRRA	TMEM164	SOX3	HPGD	AEBP1	ATP6V1H	NCOA7	WARS1	INSIG1			CDA	EIF4A2	IL4	GAPDH	MSH2	CDK4		LAMA2	RELA	RBP4	RDH16	HADHB	PDK3		RAB40C	AGO2	PMP22		GATA1	APOC1	MAPKAPK2	LONP2	SLC35B2	MAP3K7	ZNRF4	GYPC	SLC6A14
SOCS3	PGF	ATXN2	WASF2			PIK3R5	TSG101	CHAF1A	ATF3		HIBCH	ARL3	CHPT1	ANKH	HBEGF	GBF1	TMEM140	PSME1	LAYN			MT3	EIF4E	STAT2	DHFR	CDKN3	SNRPD3		FSTL3	TNFAIP6	GCKR	INMT	ATP5PD	CXCR4		ERCC5	SOD2	CDON		RBM38	CRIP2	TNFRSF21	DHCR24	FDPS	IL15	AGFG1	LY96	ITGB1BP2
SLC2A6	GAPDHS	NFIL3	MYH10			GRB2	USP11	NOLC1	LGALS3		SUCLG1	MED13L	KLK10	GNAI3	MEF2C	KRT18	CD74	ISG20	PFN1			CASP7	IARS1	SLA	DHCR7	ATAD2	PSMD1		TPM2	IL7R	CDA	UGDH	PDHA1	GPC4		CDH13	PPP1R2	PIK3R3		PRDX2	KLK8	NT5E	ABCA8	ALB	CTSS	SNAP91	FLT4	SLC12A3
PTGER4	CHST2	ALCAM	CENPE			IRF1	TAF1C	GSPT1	LUM		STAT5A	SEMA3B	ELOVL5	SRF	NOS1	CAV2	GMPR	IRF2	CNN2			PRSS36	DDX10	EGFR	IMMT	RPA1	RACK1		INHBA	IL18	MTHFD1	GSTZ1	NDUFA8	ECD		DDIT3	RHOB	NOTCH2		RNF123	SERPINC1	FLT3LG	PFKM	FADS1	CD47	PSMG1	SPON1	YBX2
DUSP5	TMEM45A	FABP5	CYTH2			DNTT	TARBP2	BUB3	LMNA		ITGA7	KRT18	RAPGEFL1	SLC38A2	CNN3	ATP1A1	PSMA3	TRIM14	TAOK2			PFN1	GEMIN4	PLA2G12A	UCHL5	STMN1	GOT2		DAB2	GABBR1	ADH7	IDH3B	DLD	GNE		TGFB1	RET	SYNJ2		MINPP1	ANXA1	CCND2	DIO1	STS	PRF1	CHFR	BMP2	CKM
SERPINB2	BCAN	S100A11	MID1			CSF2	POLH	SMC1A	GADD45B		MRAP	SLC16A1	JAK2	HMGCS1	IGFBP7	BNIP3	PROCR	FCGR1A	AMIGO2			GZMB	TARS1	MAPK10	YKT6	TIPIN	PABPC4		EMP3	CD82	DHRS1	MDH1	OPA1	B4GALT2		FUCA1	PDLIM3	SMAD7		TNS1	ITIH1	TRAF1	RXRA	SMARCC1	IL12RB1	TNP2	PLEK2	CPB1
NFIL3	ATF3	CPEB2	KLC1			IL2RA	CETN2	ILF3	CDK2		PLIN2	TJP3	SLC26A2	ARID5B	CACNA1H	ZW10	IL7	MARCHF1	MDK			RNF4	ALDH18A1	CALR	INSIG1	TK1	CCT5		BASP1	TNFSF9	VNN1	CRAT	SLC25A11	FUT8		H2AW	EPCAM	MAP1B		CTSE	PRSS23	LCLAT1	FDXR	ITGB1BP1	LCP2	EZH2	IGF2	MAGIX
SERPINE1	CAV1		MARK4			PTPN11	POLD1	CDC7	IFNB1		CYC1	SLC26A2	SLC22A5	CDC14B	GSN	GALC	IFI30	SOCS3	INPPL1			ZEB1	DDIT4	THEM4	SQLE	CDCA8	PRPS2		ITGA5	NMUR1	CNDP2	ETFDH	ATP5ME	MIOX		TP63	DNAJA1	TENT4A		DMTN	FBN1	IL3RA	TTR	SIAH1	SOCS1	HBZ	NR1H4	ARHGDIG
TRIB1	AMPD3		ARL8A			IL12RB1	CANT1	INCENP	RETSAT		ALDH2	FCMR	ITPK1	TNFAIP8	CACNG1	ADAM10	IRF2	JAK2	CLDN6			CASP5	HSPA9	RIT1	IGFBP5	ESPL1	ACP1		MGP	IL2RB	SLC6A6	CD36	PDHB	VCAN		HSPA4L	SULT1A1	PTEN		HDGF	MST1	CYFIP1	KLF1	SLC25A19	CDKN2A	ARL4A	SNAP25	CALML5
TIPARP	GPC3		CEP57			CCR1	PDE4B	CKS1B	SMAD7		RNF11	SULT2B1	PCP4	XRCC5	PPFIA4	RAB5A	CSF1	HLA-DMA	ARPC2			IRF1	SEC11A	MKNK2	IFI30	NCAPD2	PRPF31		VEGFA	TLR1	FETUB	ECI2	ATP5MF	GPC3		EPHX1	CHKA	DYRK1A		XPO7	F3	BCL2	SLC29A1	CDK7	STAT4	SLC12A2	ACE	KRT1
RELA	NDST1		UXT			CNTFR	DGCR8	EXO1	SOD1		ALDOA	SNX24	PAPSS2	GPD1L	MB	GOLGA4	IL15	PARP12	SRC			CPQ	EIF4A3	PPP2R1B	CYP51A1	RANBP1	CCT2		CXCL1	LPAR1	CROT	SDHD	NDUFB7	B3GALT6		ABHD4	CYP1A1	NEK7		MKRN1	KLF7	FGL2	BCAR3	RXRG	CD7	BRAF	PRRX1	MTHFR
BIRC2	IRS2		ARHGAP4			PLA2G2A	RAD51	H2AZ1	PTK2		SULT1A1	TFAP2C	NAB2	ACTN1	SPHK1	SEC24D	CNP	TNFAIP6	PBX2			CDK5R1	POP4	CAB39L	FGL2	MRE11	KARS1		WNT5A	IRAK2	GAD1	ACSL5	IDH2	HSPA5		H2AJ	ATP6V1F	SPOP		SMOX	CTSE	PRNP	LCK	ALDH1A1	HLA-DOB	VDAC3	C3AR1	ABCB11
CXCL6	SAP30		CDC42EP4			CXCL9	SURF1	TFDP1	ENO2		DDT	TTC39A	FAM102A	RPS6KA3	SCHIP1	AP1G1	TENT5A	TRIM26	MAPK14			ATOX1	ERO1A	ARPC3	ENO1	KIF4A	DEK		SDC1	RIPK2	AKR1C2	HSDL2	MTX2	ME1		TRAF4	CDO1	F3		TFDP2	ITGB3	EEF1AKMT1	PEX11G	UGT2B17	CD8A	POMC	TRAF1	MYOT
LITAF	GAA		SASS6			CD44	PNP	CCND1	HMOX1		SDHB	GJA1	BCL2	TSC22D1	MEF2D	MAPK1	IL4R	VCAM1	MAP4K2			PIK3CA	CEBPG	PITX2	IDI1	LMNB1	EIF4G2		PLOD2	MMP14	TKFC	HMGCS1	VDAC3	ADORA2B		CTSF	ALDOA	ERBB2		MXI1	CAPN5	PUS1	SLCO1A2	CADM1	ICAM1	IFT88	TLR8	CELSR2
TNFAIP6	SDC4		LATS1			IL7	ADA	KPNB1	IER3		CD151	PRSS23	LSR	PDLIM5	SMTN	GOSR2	CMTR1	CD274	PTEN			TMPRSS6	BAG3	NCK1	CYB5B	KIF22	XPOT		PCOLCE	P2RX7	IGF1	SDHC	MDH1	UGP2		IER5	NPTXR	GRK5		HBB	CSRP1	ITGAV	ALDH1A1	SERPINA6	CCL4	TKTL1	ID2	KLK7
CD44	STBD1		OPHN1			CXCL11	NME3	JPT1	BCL2L10		SLC27A1	OLFM1	CACNA2D2	TMEM50A	CDKN1A	RPS6KA3	CD47	CIITA	CALB2			CPM	KDELR3	IL2RG	SHMT2	UNG	SRM		GREM1	SLC11A2	SSR3	CD1D	ATP5MC2	MIF		TAX1BP3	EIF2S3	DUSP1		MOSPD1	KLKB1	NCS1	SULT1B1	CLN8	GZMB	NEK2	TMEM100	THNSL2
INHBA	IER3		WASL			CCL7	GTF3C5	LBR	CD2		BCKDHA	RAPGEFL1	CA2	ADAMTS1	GAA	STAM	LPAR6	NAMPT	CNTN1			RCE1	CEBPB	PFN1	TXNRD1	SMC1A	UBA2		ITGB1	SELL	GABARAPL1	GCDH	IMMT	NANP		TSC22D1	CNP	VLDLR		SLC25A37	MSRB2	DCPS	NR1I2	RDH11	CSF1	STAM2	PLAUR	CHRNG
PLAU	PKLR		MAP3K11			LTB	NT5C	HUS1	GCH1		C3	ASB13	ASCL1	NCOA4	TPD52L1	ABCA1	MOV10	SELP	TSPAN4			CALM1	CNOT2	FASLG	G6PD	CCNE1	KPNB1		COL5A3	P2RY2	TMBIM6	GPD2	MDH2	ZNF292		RGS16	GRINA	CAV1		SLC30A1	TFPI2	AMACR	GC	CTBP1	IL11	H1-6	GADD45G	NR4A2
MYC	IGFBP1		SOS1			IL17RB	AK1	KIF20B	MMP2		LEP	TIPARP	ACOX2	AKAP12	HSPB2	SNAP23	CASP8	GPR18	VCAN			DOCK9	SHC1	NOD1	SLC9A3R1	CDCA3	PSMA7		RHOB	ABCA1	CD36	ALDH3A1	SLC25A3	STC2		HRAS	BID	COL11A1		ABCB6	MMP3	FAM126B	ABCA4	HSD11B2	STAB1	GMCL1	CBX8	CD40LG
TNFRSF9	PLAUR		ABL1			CD36	GTF2H1	TOP1	VDAC2		ADCY6	ABCA3	CISH	SCD	SGCA	SOD1	TXNIP	FPR1	CDH8			KYNU	SPCS3	DAPP1	RAB1A	ASF1B	TRA2B		HTRA1	FFAR2	CES1	SLC22A5	ATP6V1D	TPST1		PVT1	POLG2	CDC42BPA		SLC6A8	MEP1A	PTH1R	SLC35B2	TTR	IL2RA	MTNR1A	SCN1B	KRT13
SGK1	CAVIN3		TIAM1				HCLS1	PDS5B	TAP1		ELOVL6	FRK	GLA	PTK2B	BDKRB2	GLA	SLC25A28	HELZ2	ATP1A3			RASGRP1	H2AX	UBE2D3	EBP	POLA2	COX5A		FGF2	PROK2	SHMT2	PDHB	VDAC2	PGM2		ZFP36L1	IL6ST	CDK13		TFRC	GP1BA	ODC1	SLC23A1	ERCC3	NLRP3	RFC4	PTBP2	GP2
TNIP1	CCN5		KIF1B				APRT	SRSF1	PLAT		LTC4S	DHRS2	PTGES	CDK6	COX7A1	ATP6V1B1	SELL	PSME2	EPB41L2			USP14	SLC1A4	CAB39	PNO1	TIMELESS	PA2G4		SNTB1	GNAI3	TMEM176B	TDO2	ACADM	GYS1		SDC1	HYAL2	SFMBT1		RCL1	APOA1	IGF1R	NUDT12	ATXN1	CCND3	DBF4	NAP1L2	CD207
NAMPT	LARGE1		ITSN1				ERCC8	STIL	IFNGR1		SPARCL1	AQP3	PERP	ADRM1	COL4A2	STX12	TRAFD1	SERPING1	MYL9			LCP2	RPS14	AP2M1	PIK3R3	HELLS	PCBP1		GADD45A	TACR1	GSTT2	FASN	COX7A2L	TKTL1		WRAP73	FOSB	ADORA2B		TOP1	SERPINA1	PTCH1	ABCA1	SULT2B1	EIF3A	PRKAR2A	AKAP12	CCR8
FOSL2	NOCT		SHROOM1				IMPDH2	ABL1	APP		RMDN3	KCNK15	OPN3	H1-0	PLXNB2	CD63	BATF2	CCL5	SPEG			GP1BA	NPM1	MAP3K7	ACTR3	UBE2S	HNRNPA1		MEST	SLC7A1	PLG	NBN	TIMM17A	TGFA		RAP2B	MGAT1	BHLHE40		EPOR	TF	ENO3	PAOX	CRABP2	SIT1	TTK	PLAT	ZBTB16
PNRC1	S100A4		NCK2				POLB	DTYMK	BRCA1		MTCH2	TGIF2	KRT13	HSD17B14	CTF1	TOM1L1	RIPK2	RNF31	ADRA1B			KIF2A	CNOT6	PRKAG1	LDLR	PRKDC	CCNA2		LRRC15	CDKN1A	HMOX1	PSME1	ATP6V1E1	CHST2		COQ8A	NKX2-5	COL3A1		TNRC6B	PEF1	CD81	SLC22A18	CRABP1	IFNAR2	DMC1	SCG3	PRKN
ID2	RRAGD		DLGAP5				SDCBP	CDC27	ROCK1		SOWAHC	FOXC1	HSPB8	VAPA	COL15A1	SSPN	CCRL2	SOD2	SYK			GNB4	CKS1B	CSNK2B	SLC2A3	RAN	PPIA		TNFRSF11B	CYBB	SPINT2	PPARA	NDUFA3	PHKA2		PLXNB2	PPAT	KCNMA1		ACSL6	GNG12	MAFF	DIO2	TOP2A	HDAC9	NCAPH	ANO1	CPA2
CD69	ZFP36		BCR				SF3A3	BARD1	PSEN1		SLC1A5	ELF3	UGDH	CCND1	KCNH2	ARFGAP3	NUB1	TRIM25	CADM2			LCK	PSAT1	PRKAA2	UBE2D3	USP1	EIF3J		CD59	TIMP1	ALDH3A1	NCAPH2	SLC25A6	STMN1		HEXIM1	FURIN	SYNE1		GAPVD1	SIRT2	EMP1	RBP1	SCGB1A1	CARTPT	PEBP1	IL1RL2	MEFV
IL7R	EGFR		RANBP9				DAD1	ATF5	DCN		CMPK1	REEP1	CLIC3	XRCC6	AGRN	RAB9A	OGFR	LAP3	ALOX15B			OLR1	EIF4G1	ATF1	ELOVL5	SPAG5	ORC2		ACTA2	HBEGF	GSR	BPHL	IDH3G	GALE		PROCR	MRPL23	IGF1R		MGST3	COMP	CDKN1C	SLC23A2	ERCC1	TRAT1	CHRM4	CXCL10	CCNA1
EFNA1	EDN2		EPB41L2				UPF3B	CDC45	PSEN2		REEP6	PEX11A	KLK11	MYL12A	MYO1C	CTSC	MVB12A	PSMA3	CX3CL1			PREP	YWHAZ	SLC2A1	CACYBP	POLD3	PSMA2		EFEMP2	SCARF1	ABHD6	ODC1	ACADVL	MET		SPHK1	HTR7	CELF2		SLC30A10	HTRA1	CAPN3	ATXN1	DLG4	CCL22	TOPBP1	ATG10	SLC38A3
PHLDA2	IDS		SEPTIN9				GUK1	ODC1	SOD2		NDUFA5	PODXL	PLAC1	UBE2I	SIRT2		ELF1	RNF213	MYH10			MSRB1	SLC30A5	PIN1	EDEM1	DUT	SYNCRIP		MATN2	EBI3	XDH	CA6	ETFA	LCT		NOL8	CXCL2	MTA1		CAT	MAFF	IL1R2	GCLM	PABPC1	APBB1	SCG5	YRDC	KLK8
PFKFB3	CDKN1A		KATNA1				TP53	XPO1	BMF		FZD4	KLF4	ABHD2	PTPN21	SGCD			PELI1	DMP1			LTA4H	MTREX	TNFRSF1A	ATP6V1D	TACC3	HDAC2		PCOLCE2	NFKBIA	PPARD	DLD	TIMM9	IRS2		DEF6	KLHDC3	EFEMP1		BCAM	LRP1	SYT11	NEDD4	FABP6	FYB1	NEFH	HDAC9	CYP39A1
CCL5	RORA		TUBD1				ADRM1	SFPQ	EREG		DRAM2	BAG1	SCARB1	AKT1	SORBS1			CFB	CDSN			ZFPM2	KIF5B	LCK	TES	KIF18B	LSM2		SERPINE2	SRI	ELOVL5	HCCS	IDH3A	POLR3K		SP1	PRPF3	LAMC1		HBZ	PF4	TTC39B	RXRG	ABCB9	IL1B	MAP7	PEG3	KCNQ2
YRDC	DUSP1		TPX2				SEC61A1	TMPO	KRT18		MGST3	CELSR1	DCXR	PA2G4	VIPR1			CD86	MAPK13			LYN	DCP1A	RPS6KA3	TM7SF2	CDC25B	VBP1		GPC1	SLC7A2	CYP4F2	EPHX1	TIMM8B	B4GALT1		JAG2	DNAJB1	PHF3		ACKR1	CPQ	ANXA4	AR	CACNA1B	TIMP1	BUB1	SEMA3B	SLC30A3
IFNGR2	MIF		KIF3C				POLA2	PML	TGFB2		ATP1B3	PLAAT3	CCND1		FGF2			TXNIP	MYL12B			ACTN2	IFIT1	NGF	PSMA3	SRSF1	PSMA6		ABI3BP	CCL17	RETSAT	DLST	ATP6AP1	EFNA3		CCP110	AP2S1	SCAF8		PSMD9	MMP15	BATF	BMP6	SEMA3C	RPS19	SEPTIN4	TNNT2	CHST2
SQSTM1	PPP1R3C		SHROOM2				FEN1	BRCA2	RELA		RETN	SLC7A5	SFN		FKBP1B			HLA-DQA1	RAC2			SIRT6	IMP3	CXCR4	ITGB2	GINS3	CNBP		FUCA1	TLR3	CYFIP2	FMO1	TIMM13	LHX9		DRAM1	PSMC3	VAV2		ISCA1	RABIF	P4HA1	SERPINA6	VPS4B	JAK2	PGS1	LIF	ITIH3
BTG3	DPYSL4		TUBGCP6				ZNF707	CTCF	WEE1		STOM	MPPED2	ABCA3		TEAD4			GCH1	FBN1			APOC1	SPCS1	ACACA	AK4	NOLC1	CDK2		SLIT3	APLNR	PINK1	AOC3	UQCRQ	KDELR3		RPL18	TST	PIAS3		PDZK1IP1	HRG	GPR65	LIPE	CEL	KRT1	NPY5R	CFB	EGF
GADD45B	KDELR3		SPTAN1				NUDT9	KNL1	RARA		ESYT1	TIAM1	SULT2B1		CASQ1			PNP	DSC1			PRKCD	DNAJA4	SMAD2	SLC1A4	SLBP	TARDBP		LAMA1	OSMR	GCLC	UROD	ABCB7	TALDO1		CEBPA	SIGMAR1	ACVR2A		H4C3	C8G	SLC1A5	EFHC1	ESR2	WARS1	TSN	BTC	MSH5
KYNU	DTNA		PALLD				PDE6G	KMT5A	CD14		GHITM	CLDN7	CCNA1		KLF5			CCL7	CD34			ITGAM	VEGFA	PAK4	TOMM40	CHEK2	NOLC1		PMEPA1	IL10RA	ESR1	CPT1A	VDAC1	DPYSL4		KIF13B	GCH1	NRP1		ICAM4	APOC2	IGF2R	IDH2		IFNGR2	CDK1	PPP1R15A	TEX15
G0S2	ADORA2B		ARFIP2				TYMS	SLC38A1	CD69		DNAJC15	MYOF	STIL		PDLIM7			PTPN6	ICAM4			DGKH	TTC37		SLC6A6	SPC25	GSPT1		COL8A2	PSEN1	PMM1	KMT5A	ATP5MG	VLDLR		MXD1	BTG2	MRPS31		MOCOS	SERPINB2	CKAP4	IDI1		CCR2	SHE	PTPRR	CLPS
BTG1	HS3ST1		KNTC1				BCAP31	TRA2B	PEA15		GADD45A	RBBP8	MICB		AK1			SPPL2A	MSN			LTF	TUBB2A		PPIA	BARD1	HNRNPA2B1		FBN2	GPR183	TDO2	UBE2L6	PHB2	CD44		TRAFD1	CEBPG	CCN1		ADD1	RAPGEF3	CCR4	CH25H		EREG	PARP2	CCL20	ENTPD7
MCL1	CAVIN1		HOOK3				DDB1	MYBL2	DNAJC3		VEGFB	OLFML3	ZFP36		TAGLN			IL4R	MAPK11			MAFF	FUS		ADD3	DCTPP1	ETF1		IGFBP2	ATP2B1	MT2A	MIF	DECR1	AGL		OSGIN1	TARS1	DAB2		FTCD	CPN1	CD44	ABCA5		MMP9	TNNI3	ARG1	CLSTN3
VEGFA	NR3C1		SUN2				NFX1	TROAP	CASP2		PFKL	GFRA1	CAV1		RIT1			PNPT1	ACTC1			KCNIP2	EXOSC10		ME1	SMC3	RPL6		PFN2	TNFRSF1B	ATP2A2	SUCLG2	SUCLA2	SOX9		ANKRA2	UROD	MAGI2		ADD2	ITGA2	P2RX4	SULT2B1		EGFR	PCSK1N	RETN	CYP11B2
MAP2K3	KLF6		MID1IP1				RAD52	TENT4A	CTH		COQ3	FARP1	NBL1		MEF2A			DHX58	TRAF1			PCLO	EEF2		CCNF	RNASEH2A	TOMM70		SDC4	BEST1	DDT	CPOX	GOT2	DDIT4		HBEGF	PARP2	ANXA4		BMP2K	RAC1	GATA1	SOAT2		IL16	IDE	KLF4	CLDN16
CDKN1A	GPC4		DLG1				ADCY6	CUL3	PLCB2		NABP1	SVIL	CD44		ANKRD2			BTG1	CRB3			DOCK10	EXOC2		SLC37A4	DEK	PTGES3		CD44	GPC3	FABP1	SMS	DLAT	IDUA		RAD51C	BTG3	COL1A1		BPGM	DPP4	KLF6	TFCP2L1		CFP	GPR182	MMD	HSD11B2
CCN1	CCN1		FLNA				ARL6IP1	MAPK14	BMP2		CYP4B1	TGM2	HR		AKT2			CASP8	ITGA2			SH2B3	PAIP1		ALDOA	CENPM	PSMA1		GADD45B	SCN1B	ACP2	CBR3	ATP6V1H	CASP6		ITGB4	DLG4	SCHIP1		CLCN3	WDR1	ARL4A	NR0B2		WAS	RAD17	PDCD1LG2	COQ8A
TANK	TNFAIP3		ARHGAP10				DGUOK	H2BC12	HMGB2		PPM1B	DEPTOR	HOMER2		LAMA2			IFI30	ITGA10			RABIF	BANF1		BTG2	RAD51C	PSMC6		CXCL8	ACVR1B	ABCD2	NTHL1	NDUFB2	GLCE		TRIB3	CHRNA5	DDAH1		E2F2	THBS1	HOPX			ITGAL	TLE4	H2BC3	HNF1A
IFIT2	CA12		CDC42BPA				POLL	MYC	PLPPR4		ARAF	CYP26B1	BTG3		DENND2B			CCL2	BAIAP2			SRC			UFM1	CBX5	CTPS1		GLIPR1	HPN	G6PC	CIDEA	FDX1	COPB2		INHBB	NPTX2	PDGFRB		HAGH	FYN	GPR83			KLRD1	ACE	HOXD11	FGF22
IL18	HEXA		ARHGEF12				SMAD5	AMD1	H1-0		CAVIN1	PAPSS2	GAL		IFRD1			FGL2	ARHGEF6			HPCAL4			CCNG1	RFC1	HSPE1		ANPEP	SEMA4D	DDC	IDI1	HADHA	DSC2		VAMP8	ATP6V1C1	ATRX		KDM7A	PDGFB	ITGA6			RARS1	SIRT1	TRIB1	TFCP2L1
TUBB2A	BGN		MARCKS				MPG	CBX1	TGFBR3		COL4A1	SLC1A1	ETFB		NCAM1			CASP7	ACTG1			CD46			STC1	POLD2	FAM120A		P3H1	KLF6	ACOX3	AADAT	ATP6V1C1	HS6ST2		VWA5A	AQP3	KALRN		OPTN	SH2B2	CD48			TLR2	HTR5A	F2RL1	OXT
IRF1	PPP1R15A		NIN				DUT	CHMP1A	EBP		IMMT	DLC1	BAG1		SYNGR2			SECTM1	MVD			PRDM4			NMT1	DSCC1	PPM1G		VEGFC	CD48	SAR1B	REEP6	MAOB	CDK1		ABAT	PLCL1	TGFBR2		RAP1GAP	PECAM1	DRC1			CCND2	TALDO1	ANXA10	KCND1
FOS	PGM2		PCM1				POLA1	DKC1	TXNIP		DHRS7	JAK2	FRK		PICK1			IL15RA	PDZD3			GNAI3			PSMC6	ILF3	HNRNPD		MMP14	CXCR6	FBLN1	HSPH1	NDUFB4	PLOD1		CTSD	NUP58	PTGFR		CTNS	MMP7	SELP			IL2RG	NF2	TSPAN13	MACROH2A2
OLR1	PIM1		RALBP1				AGO4	YTHDC1	ANKH		COL15A1	AFF1	SLC16A1		COL6A3			CD40	ADAM9			C9			FDXR	DEPDC1	SERBP1		SGCD	SLC1A2	ADH5	APEX1	UQCR10	SDC2		PTPRE	TYRO3	ATP2C1		NFE2L1	DUSP6	GLIPR2			ETS1	CLVS1	MTMR10	NRIP2
RHOB	PRDX5		EZR				RALA	CCNT1	RHOT2		NMT1	KLK10	AFF1		CRAT			TRAFD1	PCDH1			PPP2CB			RRM2	DCK	CSTF2		PLOD1	GP1BA	CRP	NSDHL	ETFDH	GMPPB		HINT1	HMOX1	ARHGEF9		ELL2	CPB2	SMPDL3A			ITK	CNIH2	CFH	RGS11
AREG	NAGK		SSH2				ZWINT	TGFB1	CYLD		COQ5	P2RY2	TFAP2C		DMPK			HLA-DRB1	SLIT2			IRF2			DHCR24	CDKN2C	PRDX4		MATN3	TAPBP	ABCC2	ADIPOR2	GPX4	PAXIP1		ALOX15B	RPN1	NFKB1		SLC2A1	S100A13	PLSCR1			NCR1	GRM8	LAT2	CPEB3
NINJ1	CDKN1B		CDK1				BCAM	ATRX	GSTM1		LAMA4	BLVRB	IGSF1		MYH11			GBP6	KRT31			FYN			PSMC4	MYC	EIF4E		MYL9	RGS16	ETS2	ACSL4	PDHX	NSDHL		VDR	BTG1	MGLL		PIGQ	CFD	FURIN			MAP4K1	STRBP	ERO1A	TG
ZBTB10	BRS3		RAB3GAP1				TK2	LIG3	GSR		AGPAT3	CISH	HPRT1		MYH9			LCP2	SGCE			JAK2			CTH	TCF19	ODC1		SLC6A8	SLAMF1	NPC1	ACSS1	MFN2	RARS1		ELP1	FMO1	FBLN5		KLF3	DCT	SERPINB6			CCL19	ADCYAP1	RELN	PTPRJ
PLPP3	TKTL1		FARP1				CSTF3	NUP50	BGN		BAZ2A	GLA	CDC6		IGF1			HLA-G	GNAI1			PLA2G4A			PSME3	RAD1	USP1		CALU	LCK	CASP6	ENO3	AIFM1	SLC16A3		WWP1	ASNS	PDLIM5		EPB41	LEFTY2	TNFSF11			PSMB10	ALOX15	KCNN4	NUDT11
KLF4	MT1E		SYNPO				GTF2H5	SLC7A5	BCL2L1		IDH3A	ADD3	FARP1		CKB			MT2A	PIK3CB			PRCP			CFP	LBR	RPL22		PRRX1	HIF1A	BPHL	IDH3G	ACAA2	GLRX		NUPR1	DDX21	MAPK14		LAMP2	ANG	GPX4			RPL39	MEP1B	TMEM176A	FSHB
CXCL11	ATP7A		RHOF				HPRT1	RBL1	GNA15		LIFR	PDLIM3	AMFR		FST			RIPK1	NLGN2			USP8			POLR3G	NBN	HNRNPA3		TNFRSF12A	AHR	IL1R1	LGALS1	ETFB	SRD5A3		TCN2	KCNH2	SRI		TMEM9B	C1QA	LRRC8C			EIF3J	SCG3	MAP4K1	IDUA
SAT1	MT2A		ECT2				BOLA2	NUMA1	MGMT		PREB	MINDY1	DHRS2		GPX3			KLRK1	YWHAH			RHOG			ACACA	PTTG1	NCBP1		FMOD	NMI	ENTPD5	METAP1	COX11	SDC3		CDKN2AIP	COL2A1	INPP4B		EZH1	HMGCS2	CCNE1			ABCE1	GFI1	PTGS2	TNNI3
CSF1	SDC3		EPB41				GPX4	RAD54L	PPT1		PTGER3	FOS	NXT1		PVALB			UPP1	PARVA			L3MBTL4			QDPR	UBR7	RPLP0		ID2	RHOG	TNFRSF1A	ALDOA	ECHS1	HDLBP		POM121	MAOA	IGFBP5		CTSB	ISCU	CASP3			CD8B	ELOVL3	IL33	GTF3C5
GPR183	TIPARP		RAPGEF6				MPC2	EFNA5	F2		GPHN	KRT8	S100A9		PTP4A3			PSMB2	CRAT			LAMP2			MCM2	POLE4	ABCE1		GEM	TPBG	IGFBP4	ACSM3	PMPCA	COL5A1		ZNF365	TCHH	ITGB3		ATG4A	PLEK	SH3BGRL2			F2	IL12RB2	MAFB	TFF2
PMEPA1	PKP1		KIF22				CDA	PRPF4B	IL6		PFKFB3	SLC37A1	SLC29A1		ITGB1			TDRD7	ADAMTS5			PIM1			PSMD12	TUBG1	EIF1AX		PLAUR	NPFFR2	PYCR1	LTC4S	ATP6V0B	CLDN9		EPHA2	CYB5B	BDNF		MFHAS1	APOC3	SNX9			ELF4	DMRT1	LCP1	SSTR4
PTPRE	ANXA2		PCGF5				ALYREF	UCK2	SC5D		GPX4	B4GALT1	SLC24A3		HSPB8			HIF1A	AMH			CXCL1			SC5D	CTCF	YWHAE		MYLK	IFNAR1	CSAD	D2HGDH	SLC25A5	TFF3		JUN	HSPA13	ID1		MYL4	P2RY1	PLEC			LY86	GAD1	NGF	COPZ2
TLR2	PGAM2		STAU1				MRPL40	ARID4A	IFITM3		SSPN	CALCR	FOXC1		ACHE			EIF4E3	EGFR			F3			CANX	CNOT9	MCM7		TGFB1	ICOSLG	VTN	ADSL	DLST	STC1		MAPKAPK3	GGH	SNAI2		RNF19A	USP11	BMP2			FCGR2B	CFTR	CA2	PDCD1
ACKR3	DDIT3		ARHGDIA				NPR2	CUL1	RNASEL		SQOR	ESRP2	KIF20A		CHRNG			VAMP8	ICAM2			GNAI2			RPN1	TUBB	YWHAQ		SFRP1	RASGRP1	ID2	SUCLA2	COX15	KIF20A		SLC7A11	GAL	SCN8A		BTG2	TIMP3	ICOS			GBP2	JAM3	SERPINA3	SLC16A7
KLF10	PRKCA		AURKA				REV3L	UPF1	EMP1		43892	IGF1R	TOB1		PKIA			PFKP	CD274			CASP9			HSPA4	SMC6	VDAC1		PLOD3	IFITM1	ETFDH	SDHA	CYB5A	GYS2		SERTAD3	NTRK3	ATP2B1		SLC11A2	ACOX2	ALCAM			PRKCG	IP6K1	RGS16	KCNE2
MARCKS	SLC37A4		FBXO5				EDF1	DR1	CAV1		DLD	NBL1	FDFT1		NAV2			CD38	CDH15			XPNPEP1			NIBAN1	ZW10	SMARCC1		IL6	KCNJ2	HRG	XIST	ALAS1	SLC37A4		IRAK1	PPT1	FHL2		ADIPOR1	HNF4A	LTB			RPS9	HOXB1	CTSS	MFSD6
LAMB3	CXCR4		NUSAP1				GSDME	MNAT1	DNM1L		ITIH5	SFN	DNAJC1		HDAC5			ZBP1	SHC1			PLSCR1			TBK1	PA2G4	SNRPD2		APLP1	LY6E	TYR	OSTC	SLC25A4	LHPP		ABCC5	FGF18	KIT		ASNS	S100A1	ENPP1			MTIF2		USP12	KLHDC8A
CEBPB	EFNA3		PXN				TMED2	SMC2	ANXA1		CD302	OPN3	TPSAB1		ATP6AP1			BANK1	MPZL2			IRF7			SEC11A	SSRP1	HNRNPU		FBLN2	IL18R1	UPP1	GLUL	CPT1A	SDHC		UPP1	FKBP4	APBB2		DCUN1D1	GNB2	IL1RL1			GZMA		CPE	CNTFR
TRIP10	CP		BCAR1				STX3	RBM14	TOP2A		ATL2	ABHD2	TSTA3		CLU			TOR1B	WNK4			CD55			BCAT1	NAP1L1	HDDC2		MSX1	IL10	BCAR1	CYP4A22	SLC25A20	NASP		CD81	STIP1	PIK3CD		ALDH1L1	ARF4	MYO1C			AARS1		SPARCL1	IL5
F2RL1	KLF7		CD2AP				RAE1	RPA2	ISG20		GPAT4	AR	FGFR3		ACSL1			RBCK1	NFASC			HSPA5			PSMB5	ANP32E	PSMD3		PTX3	KCNA3	CBR1	GABARAPL1	MTRR	AURKA		LIF	EIF5	DLC1		DCAF10		IFNGR1			CD96		ABCB1	NPHS1
KLF9	CCN2		AKAP13				UMPS	SQLE	SLC20A1		LPCAT3	SLC39A6	SGK1		COL1A1			PDE4B	PIK3R3			GNB2			PSMD13	HMGB3	RRM1		FZD8	HAS2	APOE	AQP7	COX17	B3GNT3		RPL36	ENO2	MT1E		YPEL5		PLIN2			CSK		USH1C	SCGB1A1
LDLR	CHST3		HDAC6				EIF1B	ORC6	MADD		TKT	SYT12	ID2		MRAS			MVP	SDC3			DYRK2			PGM1	IPO7	SF3A1		JUN	DCBLD2	SLC12A4	CYP1A1	CYB5R3	ISG20		FAM162A	GPX3	DBP		SEC14L1		IL18R1			HIF1A		CSF2RA	CCDC106
TGIF1	TPD52		CEP131				AK3	CDK4	PPP2R5B		UQCRC1	CD44	GALE		PDE4DIP			IL7	SIRPA			PLA2G7			PLK1	RAD21	LSM7		FERMT2	LAMP3	TMEM97	PRDX6	TOMM22	LDHC		RNF19B	PRKACA	HAS2		USP15		AHNAK			CCL2		BTBD3	PAX3
RNF19B	LXN		LLGL1				NUDT21	POLE	BCAP31		CAT	MED24	BATF		AGL			BPGM	GRB7			S100A12			GLRX	CDK4	ERH		DKK1	VIP	SLC46A3	ERP29	ACAT1	ARPP19		CDK5R1	PRKCD	SLC22A18		RIOK3		PRKCH			ICOSLG		IL2RG	VPREB1
DRAM1	B4GALNT2		ATG4B				RBX1	RASAL2	ERBB3		OMD	BCL11B	MAPK13		ERBB3			CMTR1	FLNC			GRB2			COPS5	CDKN1A	RPL14		SNAI2	CD70	PTGDS	H2AZ1	MRPS11	CENPA		STEAP3	STARD3	ICA1		SIDT2		TNFRSF8			NPM1		DNMBP	TSHB
B4GALT1	PPARGC1A		PCNT				SRSF6	HOXC10	NEDD9		DLAT	CANT1	FABP5		GABARAPL2			AUTS2	PARD6G			PHEX			ETF1	BRMS1L	PSMB3		DST	RGS1	MPP2	GAPDHS	ATP6V0C	HOMER1		PITPNC1	MARK2			FOXJ2		SYNGR2			IL4R		IL10RA	CACNA1F
DNAJB4	BCL2		ALMS1				GMPR2	RPS6KA5	SAT1		MRPL15	KRT13	MEST		CAV3			B2M	COL9A1			GNGT2			GSK3B	CTPS1	IFRD1		TPM4	SLC31A1	PTGR1	DHCR24	PDK4	BIK		SLC35D1	SLC6A12			TCEA1		GALM			CCL11		EREG	AKR1B10
CSF2	GCNT2		KPTN				DCTN4	CUL4A	PDCD4		RIOK3	KRT15	JAK1		BHLHE40			RIPK2	NRXN2			DOCK4			NUP205	RAD50	NCBP2		DCN	ADRM1	AQP9	GAD2	TIMM10	CYB5A		TPRKB	SQSTM1			VEZF1		POU2F1			NME1		PRELID3B	P2RX6
PDE4B	HAS1		DST				COX17	SLC7A1	BCL2L2		RTN3	TOB1	CYP4F11		PPP1R3C			CD69	MAP3K20			MMP12			SORD	TRA2B	GLO1		GJA1	KCNMB2	EPHA2	PTPRG	LDHA	HAX1		RRP8	PTPRD			LPIN2		EOMES			FLNA		EPHB2	KRT15
SNN	KLHL24		KIFAP3				CMPK2	FOXN3	FEZ1		CHUK	SLC7A2	KCNK5		LARGE1			MYD88	SLC30A3			KCNIP3			PHGDH	CSE1L	NDUFAB1		PMP22	SERPINE1	PSMB10	IL4I1	ECI1	COG2		IL1A	MAPK8IP2			PC		NOP2			GPR65		FBXO4	PAX4
PLEK	SCARB1		PPP4R2				CCNO	HMGA1	ERBB2		G3BP2	LAD1	CPE		LPIN1			PSMA2	RHOF			FDX1			GMPS	PAICS	CUL1		IGFBP4	MXD1	FAS	TP53INP2	MRPL11	IL13RA1		PMM1	CDK2			HBBP1		PTRH2			ACHE		CROT	BTG2
STAT5A	SLC25A1		ARHGAP29					SS18	DNAJA1		SDHC	TUBB2B	XRCC3		CDH13			PIM1	BMP1			TIMP2			RRP9	STAG1	NHP2		COPA	AXL	ACOX1	PDHA1	FXN	NOL3		TPD52L1	ONECUT1			CDR2		RHOH			EIF3D		MPZL2	GPR3
DENND5A	SDC2		RASAL2					TRAIP	DAP3		SAMM50	TBC1D30	CXCL14		NQO1			NOD1	MMP2			MMP8			EEF1E1	LUC7L3	CLNS1A		LRP1	MEFV	GART	RAP1GDS1	MRPS12	CLDN3		IFI30	RFC4			CCND3		CDC6			IGSF6		ANKH	GRID2
CCND1	CASP6		CCNB2					PRMT5	DPYD		ARL4A	SEC14L2	SCUBE2		PRNP			CFH	ICAM5			FCER1G			LTA4H	PPM1D	TRIM28		ITGA2	PVR	HPRT1	CEL	COX10	AGRN		GM2A	CA2			SLC25A38		MYO1E			F2R		CBR4	TCL1A
DDX58	VHL		PIF1					CUL5	NEFH		SNCG	ENDOD1	CDC20		PSEN2			TAPBP	VWF			RBSN			SDF2L1	NME1	RSL1D1		FLNA	CCL24	PGD	BLVRA	RHOT1	CLN6		RPS12	TACR3			TENT5C		CXCL10			IL13		DOCK2	PLAG1
SPHK1	FOXO3		RASA2					DDX39A	PAK1		PDCD4	HR	IL6ST		DAPK2			SLC25A28	MYH9			ANXA5			FKBP2	SRSF2	HNRNPC		MFAP5	PDE4B	ABCC3	SERINC1	ACAA1	TXN		EPS8L2	AMD1			FBXO34		SNX14			TAP1		GPRC5B	PKP1
CD80	PDGFB		NEDD9					MARCKS	FDXR		COQ9	SCARB1	GINS2		LSP1			PTPN1	CD209			CTSV			RDH11	XPO1	COPS5		PTHLH	LCP2	SMOX	BMPR1B	ACADSB	PAM		TM4SF1	HNRNPU			BACH1		IRF6			DARS1		RABGAP1L	IRS4
TNFAIP8	B3GALT6		SMC1A					PBK	GPX4		APLP2	NCOR2	TRIM29		SLC6A8			TNFAIP3	VCAM1			GCA			CXCR4	HNRNPD	XRCC6		TGFBR3	PDPN	TTPA	RDH11	LDHB	CAPN5		BLCAP	WIZ			NR3C1		IL10RA			IRF7		MALL	IL12B
CCNL1	SLC2A5		ACTN4					ORC5	ETF1		SOD1	RHOD	UNC13B		REEP1			SSPN	DHX16			EHD1			MLLT11	PMS2	SLC25A3		SFRP4	IRF7	HES6	ENO2	MRPS30	PKP2		MKNK2	CCK			AQP3		MAP6			ACVR2A		STRN	EPHA5
FUT4	SRPX		PKD2					SAP30	CCNA1		PTCD3	INPP5F	LAMC2		EIF4A2			NUP93	ACTG2			PRSS3			GCLC	ASF1A	MRPL9		LGALS1	MET	GCNT2		ATP1B1	ABCB6		CD82				TRIM58		TNFSF10			CXCR3		ST6GAL1	SOX10
CCRL2	EFNA1		CLIP2					KATNA1	GUCY2D		PHLDB1	PPIF	LARGE1		SH2B1			MTHFD2	NEGR1			COL4A2			TCEA1	EXOSC8	POLE3		RGS4	ATP2A2	MAN1A1		BDH2	DCN		RACK1				LMO2		SPRED2			PRKCB		PIGR	SNN
SPSB1	GLRX		CDC42					HNRNPD	AVPR1A		ENPP2	DHRS3	SLC2A8		MYBPC3			CDKN1A	NF1			CSRP1			MAP2K3	MLH1	POLD2		CDH6	SLC31A2	IGFBP1		SLC25A12	GMPPA		ST14				PICALM		SELL			CXCL9		VWA5A	CACNG1
TSC22D1	ACKR3		NDC80					POLA2			HSPB8	FDFT1	PLXNB1		ITGA7			IRF4	ADAM23			PIK3R5			HSPD1	NUP107	H2AZ1		SAT1	FZD5	ITIH4		TIMM50	BPNT1		TCHH				NCOA4		SERPINC1			PTPN6		PSMB8	SPHK2
B4GALT5	PAM		TLK1					HIRA			AIFM1	GAB2	PRKAR2B		SPTAN1			NFKB1	PLCG1			SERPINC1			SYTL2	ORC2	AIMP2		NT5E	ITGA5	PROS1		MRPL34	ANG		HDAC3				GDE1		CDCP1			NCF4		F13A1	IGFBP2
SIK1	TGFBI		TAOK2					HIF1A			CCNG2	UNC119	RPS6KA2		SORBS3			BATF2	KCNH2			ANG			MCM4	TP53	NOP56		DPYSL3	SGMS2	TPST1		ISCA1	GPR87		CCNK				SLC6A9		RORA			UBE2D1		NRP1	CAPN9
CLCF1	DCN		TBCD					SYNCRIP			PPP1R15B	KLF10	HSPA4L		PC			HLA-B	CERCAM			APOBEC3F			PPP1R15A	TFRC	PRDX3		PPIB	MARCO	LEAP2		MRPL35	GAL3ST1		RHBDF2				NNT		COCH			LIF		SOX9	TCF7L1
NFE2L2	SIAH2		CAPZB					TLE3			MDH2	HES1	TFPI2		SCD			LATS2	NRTN			GATA3			USO1	HMGA1	MRPS18B		TGM2	CD14	NFS1		IDH1	ALDH7A1		NUDT15				ARHGEF12		CSF1			CCR1		JUP	TGFB2
FOSB	PLAC8		DOCK2					NCL			ABCA1	FKBP5	SERPINA1		GNAO1			IRF5	IKBKG			DUSP5			NFKBIB	PSIP1	EPRS1		SGCG	EIF2AK2	PGRMC1		HSPA9	NT5E		TGFA				PPP2R5B		F2RL2			MBL2		ADGRL4	SMPX
PER1	FBP1		CTTN					RAD23B			COX7B	SLC2A1	TNNC1		STC2			SLAMF7	DSC3			CASP3			UNG	DDX39A	KPNA2		ITGB3	ROS1	CYP17A1		MRPL15	IDH1		ISCU				C3		UCK2			DEGS1		ZNF277	LYPD3
NFAT5	TPST2		SMC4					E2F2			MYLK	AMFR	HMGCS2		CFD			ISOC1	ACTB			USP16			GTF2H1	SNRPB	HSP90AB1		PDLIM4	ATP2C1	ARPP19		MRPS15	PYGL		LDHB				MARCHF2		CA2			TPD52		EPB41L3	PNMT
ATP2B1	PHKG1		ARFGEF1					EGF			COX8A	NADSYN1	ALDH3A2		RB1			P2RY14	TUBG1			CP			RPA1	CDKN1B	RPL34		CTHRC1	NDP	SERTAD1		TOMM70	NDUFV3		TNNI1				UCP2		IFITM3			AKT1		PCSK1N	SYNPO
IL12B	MYH9		TUBA4A					HMGN2			DHRS7B	INHBB	CD9		BAG1			STAT3	PPP2R2C			PSEN1			HSP90B1	MTHFD2	SRPK1		ECM2	BTG2	ARG2		TCIRG1	NDST3		FGF13				SYNJ1		UMPS			RIPK2		FUCA1	MX1
IL6ST	CDKN1C		LMNB1					SRSF10			MIGA2	BHLHE40	IDH2		ABLIM1			NCOA3	HRAS			LIPA			ERO1A	WEE1	MAD2L1		CRLF1	MSR1	HNF4A		ISCU	PPP2CB		RXRA				FN3K		HUWE1			IKBKB		PLVAP	IFNG
SLC16A6	GRHPR		ABI1					SNRPD1			MGLL	CALB2	SORD		PTGIS			HLA-A	MMP9			PCSK9			GSR	PRDX4	DHX15		AREG	PTPRE	REG1A		POLR2F	PSMC4		APP				ABCG2		COL6A1			GCNT1		ADAM17	NR6A1
ABCA1	PCK1		ROCK1					CASP8AP2			ITSN1	FASN	MDK		MAPRE3			IL6	TNFRSF11B			DGKG			PITPNB	PHF5A	MCM4		IL15	RNF144B	CCL25		NQO2	TPBG		F2R				DAAM1		ABCB1			SOCS5		AVL9	ACTC1
HES1	INHA		CEP192					SMARCC1			DHCR7	CHPT1	ALDH3B1		OCEL1			GZMA	PKD1			GNG2			EPRS1	TBRG4	RPS5		MCM7	PCDH7	PEMT		NDUFC2	TGFBI		CLCA2				AGPAT4		RNH1			IRF8		ADAMDEC1	RSAD2
BCL6	HSPA5		BUB1					SLC12A2			RREB1	MYBBP1A	PTGER3		SH3BGR			IFNAR2	CDK8			ME1			SRD5A1	SHMT1	CCT7		GAS1	SPHK1	ACO2		MRPS22	GALK2		CGRRF1				CCDC28A		IRF8			TAP2		HKDC1	ADRA2C
IRS2	NDST2		GEMIN4					NOTCH2			CMBL	ELOVL5	RABEP1		NOTCH1			CD74	FYB1			GMFB			TUBG1	PRPS1	HDGF		PRSS2	IL18RAP	LONP1		POR	CTH		CSRNP2				GMPS		GUCY1B1			EIF4G3		MAP7	BARD1
SLC2A3	NEDD4L		PLEKHG2					TNPO2			UBC	DYNLT3	KLF4		TSC2			RAPGEF6	AMIGO1			SCG3			MTHFD2L	DIAPH3	RPS6		CADM1	RTP4	NMT1		ATP6V0E1	KIF2A		ACVR1B				ACP5		AHCY			ABI1		IL7R	HTR1B
CEBPD	TPBG		RICTOR					SMAD3			ATP5PO	ABLIM1	PPIF		TGFB1			CASP4	CD276			PPP4C			ADIPOR2	NUP153	SNRPB2		OXTR	RAF1	PTGES3		PHYH	CACNA1H		BMP2				SLC10A3		PRAF2			CCL7		RBM4	FGF16
IL23A	XPNPEP1		BCL2L11					MAP3K20			PRDX3	SOX3	SNX10		FDPS			FAS	GAMT			CCL5			NUFIP1	PSMC3IP	PSMC4		SCG2	CHST2	F10		MPC1	ANKZF1		GPX2				ALDH6A1		GSTO1			IL2RB		BPGM	TENM2
SMAD3	IL6		DYNC1H1					HSPA8			DBT	SLC24A3	METTL3		CAMK2B			OGFR	NLGN3			CTSH			CDC25A	XRCC6	CDC20		CXCL6	ITGB3	TAT		GPI	SAP30		KRT17				CIR1		TWSG1			BRCA1		ENG	CDKAL1
TAP1	SLC6A6		FSCN1					G3BP1			NDUFS3	RAB17	PLK4		EPHB3			ARL4A	SKAP2			F8			PDAP1	PNN	TUFM		MMP1	KIF1B	MARCHF6		AFG3L2	RBCK1		TM7SF3				RBM5		CDC42SE2			FGR		GFPT2	SHOX2
MSC	MAP3K1		ARHGEF7					PTTG3P			NKIRAS1	MAST4	COX6C		GADD45B			SRI	RRAS			APOA4			STARD4	HUS1	RRP9		TNFAIP3	SELE	JUP		HSD17B10	ELF3		ZBTB16				HTRA2		PLAGL1			IL18RAP		PLAU	SGK1
IFIH1	LDHC		DYNLL2					DMD			RAB34	KCNK5	ST14		APP			LYSMD2	CAP1			IL6			BUB1	RBBP7	CDC45		CAPG	NOD2	ACP1		CASP7	RPE		PTPN14				IGSF3		APLP1			MRPL3		GNG11	RIBC2
IL15RA	AKAP12		MYO1E					MEIS1			CIDEA	ELF1	NCOR2		APLNR			CSF2RB	EXOC4			AKAP10			ARPC5L	PDS5B	TYMS		CAP2	C5AR1	MBL2		PRDX3	B4GALT4		TSPYL2				BTRC		PLPP1			CXCL13		PTCD2	SKIL
TNIP2	TES		BIN1					HNRNPU			UQCRQ	RPS6KA2	MOCS2		ITGB4			ST3GAL5	ACTA1			ERAP2			GPI	NOP56	ILF2		MXRA5	EMP3	TGFB2		MGST3	DEPDC1		SLC3A2				PGLS		SPRY4			CAPG		MAP3K1	NGB
BCL3	KIF5A		NOTCH2					SRSF2			PEX14	ISG20L2	NMU		SOD3			C1R	TIAL1			VCPIP1			EIF2S2	MXD3	VDAC3		FOXC2	CLEC5A	ENPEP		HTRA2	RRAGD		S100A4				SLC66A2		SCN9A			EIF5A		CBL	ASB7
PANX1	LALBA		RFC1					MT2A			BCL6	IL6ST	TH		FOXO4			CASP3	LDLRAP1			HSPA1A			CD9	PPP1R8	IMPDH2		NTM	TACR3	HSD17B2		BCKDHA	IER3		GLS2				SDCBP		SHE			RPS3A		CXCR4	MYO15A
FJX1	COL5A1		PDLIM5					NUP98			COX6A1	SYNGR1	RNASEH2A		EFS			CMKLR1	VAV2			RAF1			ATP2A2	GSPT1	SF3B3		ENO2	SLC4A4	ANGPTL3		LRPPRC	ALDH9A1		CCND3				LRP10		PDCD2L			GALNT1		NIN	SLC5A5
EDN1	GPC1		RHOT2					EWSR1			DNAJB9	SH3BP5	CHST8		PFKM			NFKBIA	AKT3			NOTCH4			GGA2	CDKN2A	NOP16		FAS	MEP1A	PC		RETSAT	DLD		PRMT2				NEK7		CCND3			ST8SIA4		IKZF1	KRT5
EIF1	HDLBP		SORBS2					KIF5B			MAP4K3	ALDH3B1	TST		COL6A2			METTL7B	SYMPK			ADRA2B			HMBS	AK2	SRSF7		BDNF	SELENOS	PDLIM5		ECH1	MERTK		NHLH2				ARL2BP		LRIG1			CCL13		WDR33	ZNF112
BMP2	ILVBL		CDC42EP1					MTF2			ANGPT1	THSD4	TOP2A		DTNA			ST8SIA4	STX4			CEBPB			RIT1	CIT	GNL3		ADAM12	LTA	CYP2E1		RHOT2	GCLC		BAIAP2				ENDOD1		SWAP70			RPL3L		MYCN	TFAP2B
DUSP4	NCAN		VCL					E2F4			UBQLN1	CLIC3	CKB		KIFC3			XCL1	PECAM1			HNF4A			SKAP2	ING3	EXOSC7		PVR	PIK3R5	BCAT1		BAX	FKBP4		RETSAT				P4HA2		SLC39A8			LY75		FCER1G	VPS50
PDLIM5	TGM2		CLIP1					BCL3			NDUFB7	NXT1	LTF		SPARC			IL2RB	MADCAM1			LGALS3			STIP1	JPT1	MRPL23		CXCL12	STAB1	ATOH8		MTRF1	SOD1		LRMP				HTATIP2		RABGAP1L			TAPBP		PECAM1	CD80
ICOSLG	ETS1		STK38L					PURA			SLC19A1	NAV2	DUSP2		SPDEF			VAMP5	ITGA9			TNFAIP3			DAPP1	POP7	RAD23B		PDGFRB	IRF1	SLC1A5		GLUD1	MED24		H1-2				SLC7A11		TGM2			NOS2		CCSER2	ATP4A
GFPT2	HOXB9		YWHAE					MEIS2			ABCB8	RRP12	PTPN6		SLN			IL18BP	CD86			CDH13			ABCF2	SYNCRIP	RPS10		SLIT2	ICAM4	IRF8		SUPV3L1	AK3		DNTTIP2				KHNYN		PNP			RPL9		SNAP91	ARPP21
KLF2	SELENBP1		RAPGEF5					PAFAH1B1			SLC66A3	ADCY1	ATP2B4		WWTR1			ZNFX1	TRO			ITIH1			NFYC	EIF2S1	PHB		NOTCH2	P2RX4	NINJ1		GRPEL1	XYLT2		MXD4				MBOAT2		AGER			BCAT1		EVI5	SERPINB2
TNC	FOSL2		CEP72					WRN			POR	DHCR7	ST6GALNAC2		CD36			ARID5B	CLDN5			TFPI2			ATP5MC1	LYAR	DDX21		COLGALT1	ABI1	AP4B1		PDP1	ARTN		SEC61A1				ATP6V0A1		ETV4			IL9		TNFRSF1B	TLX1
SERPINB8	SULT2B1		CSNK1D					H2AZ2			UCP2	MICB	ADD3		ADCY9			APOL6	MPZL1			PIK3CG			PFKL	PAN2	CYC1		GPX7	CX3CL1	ACSM1		ALDH6A1	PPIA		HMOX1				CAST		CD86			IL27RA		GPNMB	EFHD1
MXD1	TGFB3							ODF2			UQCR11	AKAP1	DYNLT3		APOD			STAT4	WASL			S100A13			CCT6A	SPC24	PABPC1		WIPF1	SLC28A2	ITIH1		OAT	CHST4		RAD9A				TYR					DYRK3		TPH1	P2RY4

## Sheet: 3-2
Table 3-2. The signatures used in T cell
# T cells
Treg	CD8 T Cell Activation	Anti-inflammatory	Anergy	Pro inflammatory	Lipid mediators	Glycolysis	TCA cycle	Pentose Phosphate Pathway	Glycogen Metabolism	Glucose Deprivation	Cytolytics effector pathway	Type I Interferon response	Type II Interferon Response	Hypoxia/HIF regulated	T Cell Terminal Differentiation	G1/S	G2/M
NT5E	CD69	TIGIT	EGR3	IL1A	ADIPOQ	ALDOA	ACLY	G6PD	GBE1	NRN1	EOMES	IRF1	IFNG	AL2	TIGIT	BRCA1	AURKA
CD3D	CCR7	IDO1	NR4A3	IL1B	CD137	ALDOB	ACO1	6PD	GYS1	FAM129A	TBX21	IFIH1	CXCL9	ALDOA	PDCD1	BRCA2	BIRC5
CD3G	CD27	LGALS3	EGR1	TNF	AgRP	ALDOC	ACO2	PGLS	GYS2	1L23A	GZMB	IFITM3	CXCL10	AM	CD274	CCNE1	BUB1
CD3E	BTLA	PDCD1	NR4A2	IFNG	ANGPT1	BPGM	CS	PRPS1	UGP2	SPRY1	PRF1	DDX58	STAT1	BCL2	CTLA4	CCNE2	BUB1B
CD4	CD40LG	FOXP3	EGR2	TBX21	ANGPT2	ENO1	DLAT	PRPS1L1	AGL	GADD45B	FASL	IFI44L	MHC I	BCL2L1	LAG3	CCNG2	CCNA2
CD5	IL2RA	ENTPD1	TNFSF11	CCL3	ANGPTL3	ENO2	DLD	PRPS2	PGM1	HSPA1A/B	GZMH	IFI6	MHC II	FOS	HAVCR2	CDC25A	CCNB1
ENTPD1	CD3E	CD274	IRF4	CCL4	ANGPTL4	GALM	DLST	RBKS	PGM2	GPNMB	GZMA	IFITM2	PD-L1	JUN	CD244	CDC45	CCNB2
CTLA4	CD47	CSF2	GCH1	PRF1	ANGPTL6	GCK	FH	RPE	PGM3	HAVCR2		NAMPT	P21	SRC	CD160	CDC6	CCNF
IZUMO1R	EOMES	CTLA4	GADD45B	GZMA	BAFF	GPI	IDH1	RPIA	PYGL	SOAT2		OASL	C-MYC	CBP		CDKN1A	CDC20
TNFRSF18	GNLY	CXCL12	NFATC1	GZMB	BMP4	HK2	IDH2	TALDO1	PYGM	ADAMTS6		RTP4	SMAD7	CCR6		CDKN2C	CDC25B
IL2RA	GZMA	CXCL5	JARID2	GZMK	CTSD	HK3	IDH3A	TKT	GSK3A			TREX1	IRF1	CEBPB		CDKN3	CDC25C
ITGAE	GZMB	IL8	SLC29A3	GZMH	CTSS	PFKL	IDH3B		GSK3B			ADAR		ENOLAS		DHFR	CDK1
LAG3	PRF1	MIF	HLF	CD8A	CCL2	PGAM2	IDH3G		PHKA1			FAM46C		FAS		E2F1	CDKN2D
TGFB1	IFNG	PTGS2	ZFP36L1	FASLG	CCL5	PGK1	MDH1		PHKB			LY6E		FASLG		E2F5	CENPA
LRRC32	CD8A	VEGFA	RNF19A	CCL2	RARRES2	PGK2	MDH1B		PHKG1			MCOLN2		FKBP52		H1F0	CENPF
TNFRSF4	CD8B		ADORA2B	CCL20	CFD	PGM1	MDH2		PHKG2			APOBEC3G		GAPDH		H1FNT	CKS2
SELL	CD95L		CCRN41	IL2	CRP	PGM2	OGDH					IL15		GLUT1		H1FOO	KIF20A
FOXP3	LAMP1		DUSP6	IL6	CXCL8	PGM3	PC					ISG15		GLUT3		H1FX	PLK1
STAT5A	LAG3		NDRG1	IL12a	CD26	PKLR	PCK1PCK2					MX1		CSF2		H2AFB1	RACGAP1
STAT5B	CTLA4		ADORA2A	IL17a	ESM1	TPI1	PDHA1					TLR3		IFNG		H2AFB2	TOP2A
LGALS1	HLA-DRA		HSPA1A	IL23a	S100A12		PDHB							IFNB1		H2AFB3
IL10	TNFRSF4		PFKP	PTGS2	AHSG		SDHA							IL13		H2AFJ
IL12A	ICOS		FYN	TLR4	FGF1		SDHB							IL1R1		H2AFV
EBI3	TNFRSF9		CTSE	TNF	FGF2		SDHD							IL2RA		H2AFVP1
TGFB1	TNFRSF18		ZFP629		FGF21		SUCLA2							IL4		H2AFX
			F2R		FGF23		SUCLG1							IL5		H2AFY
			RNF128		LGALS3		SUCLG2							IL6R		H2AFY2
			LAG3		GCG									IL8		H2AFZ
			RGS16		GH1									IL10R		H2AFZP1
			E2F1		HGF									IL15R		H2AFZP2
			E2F2		ICAM1									ITGA6		H2AFZP3
					IGFBP1									ITK		H2AFZP4
					IGFBP2									JUN D		H2AFZP5
					IGFBP3									CLB54		H2AFZP6
					IGFBP4									MAP3K5		H2BFM
					IGFBP6									MAP2K1		H2BFS
					IGFBP7									MAP2K2		H2BFWT
					IL1b									MIF		H2BFXP
					IL6									NFATC1		H3F3A
					IL10									NFKB2		H3F3AP1
					IL11									NFKBIE		H3F3AP2
					INS									P53		H3F3B
					LEP									TGM6		H3F3C
					LIF									TNF		HIST1H1A
					NGAL									TNFRSF1B		HIST1H1B
					MCSF									TRADD		HIST1H1C
					MIF									TRAIL		HIST1H1D
					MPO									TRAP1		HIST1H1E
					GHRL									VEGF		HIST1H1PS1
					GHSR											HIST1H1PS2
					LIPE											HIST1H1T
					LPL											HIST1H2AA
					AGT											HIST1H2AB
					CEBPA											HIST1H2AC
					CFD											HIST1H2AD
					FABP4											HIST1H2AE
					FASN											HIST1H2AG
					IRS2											HIST1H2AH
					KLF15											HIST1H2AI
					PPARG											HIST1H2AJ
					PPARGC1A											HIST1H2AK
					RETN											HIST1H2AL
					SRT3											HIST1H2AM
					SLC2A4											HIST1H2APS1
					SREBF1											HIST1H2APS2
					ACACB											HIST1H2APS3
					AXIN1											HIST1H2APS4
					CCND1											HIST1H2APS5
					CDK4											HIST1H2BA
					CEBPB											HIST1H2BB
					CEBPD											HIST1H2BC
					DKK1											HIST1H2BD
					E2F1											HIST1H2BE
					FABP4											HIST1H2BF
					FASN											HIST1H2BG
																HIST1H2BH
																HIST1H2BI
																HIST1H2BJ
																HIST1H2BK
																HIST1H2BL
																HIST1H2BM
																HIST1H2BN
																HIST1H2BO
																HIST1H2BPS1
																HIST1H2BPS2
																HIST1H3A
																HIST1H3B
																HIST1H3C
																HIST1H3D
																HIST1H3E
																HIST1H3F
																HIST1H3G
																HIST1H3H
																HIST1H3I
																HIST1H3J
																HIST1H3PS1
																HIST1H4A
																HIST1H4B
																HIST1H4C
																HIST1H4D
																HIST1H4E
																HIST1H4F
																HIST1H4G
																HIST1H4H
																HIST1H4I
																HIST1H4J
																HIST1H4K
																HIST1H4L
																HIST1H4PS1
																HIST2H2AA3
																HIST2H2AA4
																HIST2H2AB
																HIST2H2AC
																HIST2H2BA
																HIST2H2BB
																HIST2H2BC
																HIST2H2BD
																HIST2H2BE
																HIST2H2BF
																HIST2H3A
																HIST2H3C
																HIST2H3D
																HIST2H3PS2
																HIST2H4A
																HIST2H4B
																HIST3H2A
																HIST3H2BA
																HIST3H2BB
																HIST3H3
																HIST4H4
																MCM2
																MCM6
																MSH2
																NASP
																NPAT
																PCNA
																RRM1
																RRM2
																SLBP
																TYMS

## Sheet: 3-3
Table 3-3.The gene signatures used in myeloid cell.
Myeloid cells. # Single-Cell Map of Diverse Immune Phenotypes in the Breast Tumor Microenvironment
M1 Macrophage Polarization	M2 Macrophage Polarization	Pro inflammatory	Anti-inflammatory
IL12	ARG1	IL1B	CD163
IL23	ARG2	IL6	SEPP1
IL12	IL10	S100A8	SELENOP
TNF	CD32	S100A9	APOE
IL6	CD163		MAF
CD86	CD23
MHCII	CD200R1
IL1B	PDCD1LG2
MARCO	CD274
iNOS	MARCO
IL12	CSF1R
CD64	CD206
CD80	IL1RN
CXCR10	IL1R2
IL23	IL4R
CXCL9	CCL4
CXCL10	CCL13
CXCL11	CCL20
CD86	CCL17
IL1A	CCL18
IL1B	CCL22
IL6	CCL24
TNFa	LYVE1
MHCII	VEGFA
CCL5	VEGFB
IRF5	VEGFC
IRF1	VEGFD
CD40	EGF
IDO1	CTSA
KYNU	CTSB
CCR7	CSTC
CD45	CTSD
CD68	TGFB1
CD115	TGFB2
HLA-DR	TGFB3
CD205	MMP14
CD14	MMP19
	MMP9
	CLEC7A
	WNT7B
	FASL
	TNFSF12
	TNFSF8
	CD276
	VTCN1
	MSR1
	FN1
	IRF4
	CD45
	CD68
	CD115
	HLA-DR
	CD205
	CD14

## Sheet: 3-4
Table 3-4.The gene signatures used in fibroblasts.
# Fibroblast--Turning foes to friends: targeting cancer-associated fibroblasts
Pro-inflammatory	Anti-inflammatory	Chemoatrractant	Growth factors	CAF
IFNA1	IL4	CCL11	CSF3	ACTA2
IFNG	IL5	CXCL1	CSF2	FAP
IL1A	IL10	CXCL10	CSF1	S100A4
IL1B	IL13	CXCL5	VEGFA	PDGFRB
IL2	IL22	CCL2	VEGFB	VIM
IL3	IFNL3	CCL7		MME
IL6	TGFB1	CCL3		C5AR2
IL9		CCL4		TNC
IL12A		CXCL2		CAV1
IL12B		CCL5		PDGFRA
IL15				CXCL12
IL17A				FGF1
IL18				MMP2
IL23A				VEGFA
IL27				PDGFC
IL31				FGF2
LIF				SFRP2
TNF				IGF1
NFKB1				IL11
				IL6

## Sheet: 3-5
Table 3-5. The gene signatures referenced from previous studies used in this study.
	Cytotoxicity & Exhaustion: # Global characterization of T cells in non-small-cell lung cancer by single-cell sequencing
	Glycloysis & Proliferation & Hypoxia: # Characterization of Glycolysis-Associated Molecules in the Tumor Microenvironment Revealed by Pan-Cancer Tissues and Lung Cancer Single Cell Data
			MsigDB				This study
Glycloysis	Proliferation	Hypoxia	ECM remodeling		Cytotoxicity	Exhaustion	SPP1+TAMs
SLC2A1	MKI67	ALDOA	ITGAL		PRF1	HAVCR2	AMPD3
HK1	NDC80	MIF	ITGA3		IFNG	CXCL13	HCST
HK2	NUF2	TUBB6	ITGA2B		GNLY	CCL3	OSCAR
HK3	PTTG1	P4HA1	MMP25		NKG7	SIRPG	MITF
GPI	RRM2	SLC2A1	DCN		GZMB	IFNG	NCF2
PFKL	BIRC5	PGAM1	CAPN1		GZMA	TIGIT	MMP9
PFKM	CCNB1	ENO1	CD44		GZMH	GZMB	MARCO
PFKP	CEP55	LDHA	IBSP		KLRK1	PDCD1	PILRA
ALDOA	UBE2C	CDKN3	MUSK		KLRB1	PARK7	CCDC88A
ALDOB	CDC20	TPI1	TIMP2		KLRD1	TNFRSF9	CCL7
ALDOC	TYMS	NDRG1	MFAP3		CTSW	ACP5	CD36
TPI1		VEGFA	TLL1		CST7	CTLA4	SLAMF9
GAPDH		ACOT7	VCAN			RBPJ	CYP27A1
PGK1		ADM	CDH1			MIR155	HK2
PGAM1			TNC			CXCR6	NR1H3
PGAM4			COL9A2			CD27	SNX10
ENO1			LTBP1			FKBP1A	HCAR3
ENO2			ELN			BST2	SLC11A1
ENO3			LAMC3			TPI1	CLEC5A
PKLR			COL23A1			MIR155HG	AC147651.4
PKM			LAMA3			PTTG1	GPR84
LDHA			LAMC2			CD63	RETN
			COL11A1			SAMSN1	VMO1
			COL17A1			RGS1	CD163
			ACTN1			CD27-AS1	VSIG4
			P4HA2			ITGAE	CLEC4E
			NTN4			MIR4632	TREM2
			ICAM3			HLA-DRA	CCL3
			CAPN6			IGFLR1	CCL4
			FBLN1			KRT86	ACP5
			ITGA8			ENTPD1	C1QA
			CEACAM1			DUSP4	C1QB
			COL5A3			SIT1	CD14
			PSEN1			TOX	C1QC
			COL4A4			PHLDA1	FCGR2A
			COL19A1			CCND2	PLA2G7
			ITGB5			GPR25	FCGR3A
			PLOD1			LAYN	MSR1
			ITGAE			PRDX5	MS4A4A
			COL16A1			SARDH	MS4A7
			CEACAM6			FASLG	HMOX1
			ADAMTS2			MIR3917	LILRB4
			MMP2			ANXA5	SLCO2B1
			NID2			CTSD	C3AR1
			LTBP4			PDIA6	FCGR1A
			ICAM1			RANBP1	CYBB
			P3H2			FKBP1A-SDCBP2	LAIR1
			LAMB1			COTL1	SLC7A7
			ITGA6			TNFRSF1B	FPR3
			CMA1			IDH2	TNFRSF1B
			CAPN3			CD38	MS4A6A
			COL9A3			CD82	FAM26F
			TGFB2			LAG3	MCEMP1
			TLL2			MIR497HG	SPP1
			MADCAM1			APOBEC3C
			MMP11			ITM2A
			PDGFB			COX5A
			CTSG			IFI35
			MMP9			NDFIP2
			BMP7			TNFRSF18
			COL20A1			KRT81
			LAMA1			DNPH1
			TIMP1			RGS2
			MMP15			HMGN1
			CAPN15			DYNLL1
			TGFB1			SNRPB
			ICAM4			STRA13
			ICAM5			SYNGR2
			PTPRS			RAB27A
			COMP			PSMC3
			ITGB8			GALM
			PCOLCE			FABP5
			SERPINE1			UBE2L6
			PLOD3			MYO7A
			ASPN			PRDX3
			SH3PXD2A			DDIT4
			ICAM2			STMN1
			COL1A1			CDK2AP2
			VTN			VCAM1
			VWF			SNAP47
			P3H3			PSMB3
			COL12A1			ISG15
			COL9A1			HLA-DRB5
			LAMA4			CKS2
			LOX			TNIP3
			SPARC			CD7
			COL7A1			PSMD4
			ITGB6			ATP6V1C2
			ITGA4			PSMD8
			LOXL3			HLA-DRB6
			EFEMP1
			FN1
			SDC1
			TNR
			NID1
			MFAP2
			P3H1
			CTSD
			MMP8
			TTR
			SPP1
			LTBP2
			TGFB3
			TNN
			FMOD
			PLG
			P4HA1
			MMP19
			COL10A1
			SDC4
			MATN4
			CEACAM8
			COL21A1
			BMP4
			BMP2
			GDF5
			MMP24
			CAPNS1
			KDR
			LOXL1
			NCAN
			COLGALT1
			PXDN
			COL5A1
			LAMA5
			CAPN7
			MATN3
			EMILIN2
			ITGB4
			BCAN
			LOXL2
			LRP4
			COL4A2
			ADAMTS8
			CTSL
			ADAM19
			ITGA7
			CAPN9
			LAMC1
			CTSV
			CAPN11
			DDR1
			MMP7
			MMP20
			MMP13
			THBS1
			ITGA11
			ADAM10
			EMILIN1
			LOXL4
			ADAMTS14
			ITGAV
			FGF2
			FBN2
			COL2A1
			LUM
			ITGB7
			FBLN5
			MFAP1
			FURIN
			ITGAX
			ADAMTS18
			COL6A1
			COL6A2
			APP
			CAPN10
			FBN3
			HSPG2
			ITGA10
			CTSK
			ADAM15
			ITGA9
			COL8A1
			ADAMTS16
			HAPLN1
			SCUBE3
			CASK
			ADAM12
			SERPINH1
			CAPN5
			NCAM1
			P4HA3
			MMP3
			ITGB1
			ADAM8
			ADAM17
			DST
			DSPP
			DMP1
			PLOD2
			CAST
			PRKCA
			JAM2
			ADAMTS1
			ADAMTS5
			MMP16
			ADAMTS3
			ITGAD
			MMP14
			ACAN
			F11R
			ADAMTS4
			SCUBE1
			ITGB2
			COL26A1
			ITGA5
			MATN1
			SDC3
			VCAM1
			DDR2
			NCSTN
			CAPN2
			CAPN13
			CTSS
			BMP10
			COL6A3
			FBLN2
			ADAMTS9
			PCOLCE2
			ITGA2
			CASP3
			KLKB1
			COL1A2
			CTSB
			HTRA1
			JAM3
			FBN1
			MFAP4
			MMP10
			PPIB
			KLK2
			LTBP3
			TNXB
			BMP1
			COL3A1
			ADAM9
			CTRB1
			CTRB2
			COL4A3
			KLK7
			COL22A1
			SDC2
			ITGAM
			CRTAP
			COL24A1
			FGG
			FGA
			FGB
			COL8A2
			LAMB2
			TPSAB1
			BSG
			EFEMP2
			COL6A5
			DAG1
			PHYKPL
			A2M
			CD151
			PLEC
			NRXN1
			CAPN12
			BGN
			COL18A1
			EMILIN3
			P4HB
			TMPRSS6
			COL4A1
			COL14A1
			COL4A5
			AGRN
			COL25A1
			OPTC
			SPOCK3
			LAMA2
			MMP1
			TRAPPC4
			COL27A1
			CD47
			LAMB3
			PDGFA
			COL13A1
			ELANE
			COL4A6
			MFAP5
			MMP17
			COLGALT2
			DMD
			CAPN8
			COL11A2
			COL5A2
			COL15A1
			DDR1
			PRSS1
			COL11A2
			COL6A6
			ITGA1
			CAPN14
			COL28A1
			DDR1
			COL11A2
			TNXB
			DDR1
			COL11A2
			DDR1
			COL11A2
			TNXB
			CAPNS2
			ITGB3
			PECAM1
			MMP12
			PRSS1
			MMP11
			PRSS2
			ELANE
			TRAPPC4
			PRSS2
			ADAMTS2
			CTSB
