# Supplementary material for: Characterizing Intercellular Communication of Pan-Cancer Reveals SPP1+ Tumor-Associated Macrophage Expanded in Hypoxia and Promoting Cancer Malignancy Through Single-Cell RNA-Seq Data
Source: Front Cell Dev Biol. 2021 Oct 5;9:749210. doi: 10.3389/fcell.2021.749210 (PMC8523849; doi:10.3389/fcell.2021.749210)
Supplement: Supplementary file 4 [file Table_4.XLSX]

## Sheet: Sheet1
Table 4-1. The Primer sequence used in this study.
Gene name	Primer sequence (5'to3')
CD44-F	CTGCCGCTTTGCAGGTGTA
CD44-R	CATTGTGGGCAAGGTGCTATT
SLC2A1-F	TCTGGCATCAACGCTGTCTTC
SLC2A1-R	CGATACCGGAGCCAATGGT
ENO2-F	AGCCTCTACGGGCATCTATGA
ENO2-R	TTCTCAGTCCCATCCAACTCC
VEGFA-F	AGGGCAGAATCATCACGAAGT
VEGFA-R	AGGGTCTCGATTGGATGGCA
TNFRSF12A-F	CTGGCTCCAGAACAGAAAGG
TNFRSF12A-R	GGGCCTAGTGTCAAGTCTGC
CDH1-F	CGAGAGCTACACGTTCACGG
CDH1-R	GGGTGTCGAGGGAAAAATAGG
ACTB-F	AGCGAGCATCCCCCAAAGTT
ACTB-R	GGGCACGAAGGCTCATCATT
CD68-F	CTTCTCTCATTCCCCTATGGACA
CD68-R	GAAGGACACATTGTACTCCACC
ARG1-F	TGGACAGACTAGGAATTGGCA
ARG1-R	CCAGTCCGTCAACATCAAAACT
IL10-F	GACTTTAAGGGTTACCTGGGTTG
IL10-R	TCACATGCGCCTTGATGTCTG
IL1B-F	ATGATGGCTTATTACAGTGGCAA
IL1B-R	GTCGGAGATTCGTAGCTGGA
CD80-F	ACCAAGCAAGAGCATTTTCC
CD80-R	AGCAGTAGGTCAGGCAGCATA
SPP1-F	GAAGTTTCGCAGACCTGACAT
SPP1-R	GTATGCACCATTCAACTCCTCG
