# Supplementary material for: Characterizing Intercellular Communication of Pan-Cancer Reveals SPP1+ Tumor-Associated Macrophage Expanded in Hypoxia and Promoting Cancer Malignancy Through Single-Cell RNA-Seq Data
Source: Front Cell Dev Biol. 2021 Oct 5;9:749210. doi: 10.3389/fcell.2021.749210 (PMC8523849; doi:10.3389/fcell.2021.749210)
Supplement: Supplementary file 5 [file Table_5.XLSX]

## Sheet: Table 5-1
Table 5-1.The ligand receptor pairs from cancer to cancer cells,
BC
id_cp_interaction	interacting_pair	partner_a	partner_b	gene_a	gene_b	secreted	receptor_a	receptor_b	annotation_strategy	is_integrin	CS1|CS1	CS1|CS2	CS2|CS1	CS2|CS2
CPI-SS0579FA162	IGF2_IGF1R	simple:P01344	simple:P08069	IGF2	IGF1R	TRUE	FALSE	TRUE	curated	FALSE	1	1	0	0
CPI-SS006C6537E	MDK_LRP1	simple:P21741	simple:Q07954	MDK	LRP1	TRUE	FALSE	TRUE	I2D,InnateDB-All	FALSE	1	0	1	0.378
CPI-SS055E061C9	FAM3C_LAMP1	simple:Q92520	simple:P11279	FAM3C	LAMP1	TRUE	FALSE	TRUE	InnateDB-All	FALSE	1	1	0.378	0
CPI-SS0ABC5C1B8	MIF_CD74	simple:P14174	simple:P04233	MIF	CD74	TRUE	FALSE	TRUE	I2D,InnateDB-All	FALSE	1	0.936	1	1
CPI-SS0DA033F03	GRN_TNFRSF1A	simple:P28799	simple:P19438	GRN	TNFRSF1A	TRUE	FALSE	TRUE	IMEx,InnateDB-All,MINT	FALSE	1	0.628	0.968	0.442
CPI-SS09808DEAE	APP_CD74	simple:P05067	simple:P04233	APP	CD74	FALSE	FALSE	TRUE	curated	FALSE	1	1	1	0.686
CPI-SS0A4EE6FE1	FAM3B_LRP5	simple:P58499	simple:O75197	FAM3B	LRP5	TRUE	FALSE	TRUE	InnateDB-All	FALSE	1	0	1	1
CRC
id_cp_interaction	interacting_pair	partner_a	partner_b	gene_a	gene_b	secreted	receptor_a	receptor_b	annotation_strategy	is_integrin	CS1|CS1	CS1|CS2	CS1|CS3	CS1|CS4	CS1|CS5	CS1|CS6	CS2|CS1	CS2|CS2	CS2|CS3	CS2|CS4	CS2|CS5	CS2|CS6	CS3|CS1	CS3|CS2	CS3|CS3	CS3|CS4	CS3|CS5	CS3|CS6	CS4|CS1	CS4|CS2	CS4|CS3	CS4|CS4	CS4|CS5	CS4|CS6	CS5|CS1	CS5|CS2	CS5|CS3	CS5|CS4	CS5|CS5	CS5|CS6	CS6|CS1	CS6|CS2	CS6|CS3	CS6|CS4	CS6|CS5	CS6|CS6
CPI-SS0BC7CD11B	LGALS9_MET	simple:O00182	simple:P08581	LGALS9	MET	TRUE	FALSE	TRUE	InnateDB-All	FALSE	1	0	1	0	0	1	1	0	1	0	0	1	1	1	1	1	1	1	1	0	1	0	0	1	1	0	1	0	0	1	1	0	1	0	0	1
CPI-SS014958F32	LGALS9_CD47	simple:O00182	simple:Q08722	LGALS9	CD47	TRUE	FALSE	TRUE	InnateDB-All	FALSE	0.282	0	0	0	0	1	0	0	0	0	0	0.747	1	1	1	1	1	1	0.122	0	0	0	0	1	0	0	0	0	0	0.465	0	0	0	0	0	0
CPI-SS0A9FB762A	LGALS9_PTPRK	simple:O00182	simple:Q15262	LGALS9	PTPRK	TRUE	FALSE	TRUE	InnateDB-All	FALSE	1	0	1	1	0	1	1	0	1	1	0	1	1	1	1	1	1	1	1	0	1	1	0	1	1	0	1	1	0	1	1	0	1	1	0	1
CPI-SS002DF6C31	LGALS9_SLC1A5	simple:O00182	simple:Q15758	LGALS9	SLC1A5	TRUE	FALSE	TRUE	I2D,InnateDB-All	FALSE	0	0	0	0	0	0	0	0	0	0	0	0	1	1	1	1	1	1	0	0	0	0	0	0	0	0	0	0	0	0	0	0	0	0	0	0
CPI-SS09C52F54E	LGALS9_SORL1	simple:O00182	simple:Q92673	LGALS9	SORL1	TRUE	FALSE	TRUE	InnateDB-All	FALSE	1	0	1	1	1	1	1	0	1	1	1	1	1	1	1	1	1	1	1	0	1	1	1	1	1	0	1	1	1	1	1	0	1	1	1	1
CPI-SS083CBFACD	MDK_SORL1	simple:P21741	simple:Q92673	MDK	SORL1	TRUE	FALSE	TRUE	InnateDB-All	FALSE	1	0	1	1	1	1	1	0	1	1	1	1	1	0	1	1	1	1	1	0	1	1	1	1	1	0	1	1	1	1	1	0	1	1	1	1
CPI-SS046F6F0C1	EFNA1_EPHA2	simple:P20827	simple:P29317	EFNA1	EPHA2	TRUE	FALSE	TRUE	curated	FALSE	0	0	0	0	0	0	0	0	0	0	0	0	0	0	0	0	0	0	0	0	0	0	0	0	0	0	0	0	0	0	0	0	0	0	0	0
CPI-SS0B9E8C0DE	EPHB2_EFNB2	simple:P29323	simple:P52799	EPHB2	EFNB2	FALSE	TRUE	TRUE	curated	FALSE	0	0	1	0	0	0	1	1	1	1	1	1	0	0	1	0	0	0	0	0	1	0	0	0	0	0	1	0	0	0	0	0	1	0	0	0
CPI-SS02371A6D6	VEGFA_EPHB2	simple:P15692	simple:P29323	VEGFA	EPHB2	TRUE	FALSE	TRUE	I2D	FALSE	0	1	0	0	0	0	0	1	0	0	0	0	1	1	1	1	1	1	0	1	0	0	0	0	0	1	0	0	0	0	1	1	1	1	1	1
CPI-SS061A7E099	CD55_ADGRE5	simple:P08174	simple:P48960	CD55	ADGRE5	TRUE	TRUE	TRUE	curated	FALSE	1	0	1	0	0	1	1	0	1	0	0	1	1	1	1	1	1	1	1	1	1	1	1	1	1	0	1	0	0	1	1	1	1	1	1	1
CPI-SS055E061C9	FAM3C_LAMP1	simple:Q92520	simple:P11279	FAM3C	LAMP1	TRUE	FALSE	TRUE	InnateDB-All	FALSE	0	0	0.154	0.096	0	0	0	0	0	0	0	0	0	0	0.186	0.064	0	0	1	1	1	1	1	1	0	0	0	0	0	0	0.032	0	0.128	0.064	0	0
CPI-SS033CB0BB2	FAM3C_CXADR	simple:Q92520	simple:P78310	FAM3C	CXADR	TRUE	FALSE	TRUE	IMEx,IntAct	FALSE	0	0	0	0	0	0	0	0	0	0	0	0	0	0	0	0	0	0	1	1	1	1	1	1	0	0	0	0	0	0	0	0	0	0	0	0
CPI-SS0DA033F03	GRN_TNFRSF1A	simple:P28799	simple:P19438	GRN	TNFRSF1A	TRUE	FALSE	TRUE	IMEx,InnateDB-All,MINT	FALSE	1	1	1	1	1	1	1	0.032	1	1	1	1	1	1	1	1	1	1	1	1	1	1	1	1	1	1	1	1	1	1	1	0.25	1	1	1	1
CPI-SS0111AAD26	EFNB1_EPHB2	simple:P98172	simple:P29323	EFNB1	EPHB2	FALSE	FALSE	TRUE	curated	FALSE	0	1	0	0	0	0	0	1	0	0	0	0	1	1	1	1	1	1	0	1	0	0	0	0	0	1	0	0	0	0	1	1	1	1	1	1
LC
id_cp_interaction	interacting_pair	partner_a	partner_b	gene_a	gene_b	secreted	receptor_a	receptor_b	annotation_strategy	is_integrin	CS1|CS1	CS1|CS2	CS1|CS3	CS2|CS1	CS2|CS2	CS2|CS3	CS3|CS1	CS3|CS2	CS3|CS3
CPI-SS02AB0C3E0	SPP1_CD44	simple:P10451	simple:P16070	SPP1	CD44	TRUE	FALSE	TRUE	I2D,IMEx,InnateDB-All,IntAct	FALSE	0	0	0	0	0	0	0	0.157	0
CPI-SS0E292C126	KLRB1_CLEC2D	simple:Q12918	simple:Q9UHP7	KLRB1	CLEC2D	FALSE	TRUE	TRUE	curated	FALSE	1	1	1	1	1	1	1	1	0.75
CPI-SS02A0FF87F	FAM3C_CLEC2D	simple:Q92520	simple:Q9UHP7	FAM3C	CLEC2D	TRUE	FALSE	TRUE	IMEx,InnateDB-All,IntAct	FALSE	1	1	0	1	1	1	1	1	1
CPI-SS0BC7CD11B	LGALS9_MET	simple:O00182	simple:P08581	LGALS9	MET	TRUE	FALSE	TRUE	InnateDB-All	FALSE	1	1	1	1	1	1	0	1	1
CPI-SS014958F32	LGALS9_CD47	simple:O00182	simple:Q08722	LGALS9	CD47	TRUE	FALSE	TRUE	InnateDB-All	FALSE	1	1	1	1	1	1	0.532	0.808	0.343
CPI-SS034D36D2F	FAM3C_HLA-C	simple:Q92520	simple:HLAC	FAM3C	HLA-C	TRUE	FALSE	TRUE	InnateDB-All	FALSE	1	1	0.843	1	1	1	1	1	1
CPI-SS033CB0BB2	FAM3C_CXADR	simple:Q92520	simple:P78310	FAM3C	CXADR	TRUE	FALSE	TRUE	IMEx,IntAct	FALSE	0	0	0	1	1	1	1	1	1
CPI-SS0ABC5C1B8	MIF_CD74	simple:P14174	simple:P04233	MIF	CD74	TRUE	FALSE	TRUE	I2D,InnateDB-All	FALSE	1	1	0.282	1	1	0.593	1	1	0.875
CPI-SS0DA033F03	GRN_TNFRSF1A	simple:P28799	simple:P19438	GRN	TNFRSF1A	TRUE	FALSE	TRUE	IMEx,InnateDB-All,MINT	FALSE	0	0	1	1	1	1	0.433	0.968	1
OV
id_cp_interaction	interacting_pair	partner_a	partner_b	gene_a	gene_b	secreted	receptor_a	receptor_b	annotation_strategy	is_integrin	CS1|CS1	CS1|CS2	CS1|CS3	CS1|CS4	CS1|CS5	CS1|CS6	CS2|CS1	CS2|CS2	CS2|CS3	CS2|CS4	CS2|CS5	CS2|CS6	CS3|CS1	CS3|CS2	CS3|CS3	CS3|CS4	CS3|CS5	CS3|CS6	CS4|CS1	CS4|CS2	CS4|CS3	CS4|CS4	CS4|CS5	CS4|CS6	CS5|CS1	CS5|CS2	CS5|CS3	CS5|CS4	CS5|CS5	CS5|CS6	CS6|CS1	CS6|CS2	CS6|CS3	CS6|CS4	CS6|CS5	CS6|CS6
CPI-SS0579FA162	IGF2_IGF1R	simple:P01344	simple:P08069	IGF2	IGF1R	TRUE	FALSE	TRUE	curated	FALSE	1	1	1	1	1	0	1	1	1	1	1	0	1	1	1	1	1	0	1	1	1	1	1	0	1	1	1	1	1	0	1	1	1	1	1	1
CPI-SS042A6F835	IGF2_IGF2R	simple:P01344	simple:P11717	IGF2	IGF2R	TRUE	FALSE	TRUE	curated	FALSE	1	0	0	1	1	1	1	0	0	1	1	1	1	0	0	1	1	1	1	0	0	1	1	1	1	0	0	1	1	1	1	1	1	1	1	1
CPI-SS00F4DDF4B	PTN_PTPRS	simple:P21246	simple:Q13332	PTN	PTPRS	TRUE	FALSE	TRUE	I2D,IMEx,InnateDB-All,IntAct	FALSE	1	1	1	1	1	1	1	0	0	1	0	1	1	0	0	1	0	1	1	0	0	1	0	1	1	0	0	1	0	1	1	1	1	1	1	1
CPI-SS006C6537E	MDK_LRP1	simple:P21741	simple:Q07954	MDK	LRP1	TRUE	FALSE	TRUE	I2D,InnateDB-All	FALSE	1	0.096	1	1	1	1	1	0	1	1	1	1	1	0	1	1	1	1	1	0	1	1	1	1	1	0	1	1	1	1	1	1	1	1	1	1
CPI-SS083CBFACD	MDK_SORL1	simple:P21741	simple:Q92673	MDK	SORL1	TRUE	FALSE	TRUE	InnateDB-All	FALSE	1	1	1	1	1	0	1	1	1	1	1	0	1	1	1	1	1	0	1	1	1	1	1	0	1	1	1	1	1	0	1	1	1	1	1	1
CPI-SS0C56C483F	WNT5A_ANTXR1	simple:P41221	simple:Q9H6X2	WNT5A	ANTXR1	TRUE	FALSE	TRUE	InnateDB-All	FALSE	1	1	1	1	1	1	1	0	1	1	1	1	1	0	1	1	1	1	1	1	1	1	1	1	1	1	1	1	1	1	1	1	1	1	1	1
CPI-SS0331C5A49	GDF11_ANTXR1	simple:O95390	simple:Q9H6X2	GDF11	ANTXR1	TRUE	FALSE	TRUE	InnateDB-All	FALSE	1	1	1	1	1	1	1	0	1	1	1	1	1	0	1	1	1	1	1	1	1	1	1	1	1	0	1	1	1	1	1	1	1	1	1	1
CPI-SS002673EFE	WNT5A_FZD3	simple:P41221	simple:Q9NPG1	WNT5A	FZD3	TRUE	FALSE	TRUE	curated	FALSE	1	1	1	1	1	1	1	1	0	1	0	0	1	1	0	1	0	0	1	1	1	1	1	1	1	1	1	1	1	1	1	1	1	1	1	1
CPI-SS0659DBE72	EFNA4_EPHA4	simple:P52798	simple:P54764	EFNA4	EPHA4	TRUE	FALSE	TRUE	curated	FALSE	1	1	1	1	1	1	1	0	0	1	1	1	1	1	1	1	1	1	1	1	1	1	1	1	1	1	1	1	1	1	1	1	1	1	1	1
CPI-SS0FC01B947	EFNA5_EPHA4	simple:P52803	simple:P54764	EFNA5	EPHA4	FALSE	FALSE	TRUE	curated	FALSE	1	1	1	1	1	1	1	0	0	1	1	1	1	1	1	1	1	1	1	1	1	1	1	1	1	0	0	1	1	1	1	1	1	1	1	1
CPI-SS0816A4ED4	FGFR4_EPHA4	simple:P22455	simple:P54764	FGFR4	EPHA4	TRUE	TRUE	TRUE	I2D,InnateDB-All	FALSE	1	1	1	1	1	1	1	1	1	1	1	1	1	0	0	1	1	1	1	1	1	1	1	1	1	1	1	1	1	1	1	1	1	1	1	1
CPI-SS0B99F22A2	JAG1_NOTCH3	simple:P78504	simple:Q9UM47	JAG1	NOTCH3	FALSE	FALSE	TRUE	curated	FALSE	1	1	1	1	1	1	1	1	1	1	1	1	1	1	1	1	1	1	1	1	1	1	1	1	1	1	1	1	1	1	1	0	0	1	1	1
CPI-SS034D36D2F	FAM3C_HLA-C	simple:Q92520	simple:HLAC	FAM3C	HLA-C	TRUE	FALSE	TRUE	InnateDB-All	FALSE	1	1	1	1	1	1	1	1	1	1	1	1	1	1	1	1	1	0.907	1	1	1	1	1	1	1	1	1	1	1	1	1	1	1	1	1	1
CPI-SS055E061C9	FAM3C_LAMP1	simple:Q92520	simple:P11279	FAM3C	LAMP1	TRUE	FALSE	TRUE	InnateDB-All	FALSE	1	1	1	1	1	0	1	1	1	1	1	0	1	1	1	1	1	0	1	1	1	1	1	1	1	1	1	1	1	0	1	1	1	1	1	0.189
CPI-SS033CB0BB2	FAM3C_CXADR	simple:Q92520	simple:P78310	FAM3C	CXADR	TRUE	FALSE	TRUE	IMEx,IntAct	FALSE	0	0	0	1	0	0	0	0	0	1	0	0	0	0	0	1	0	0	1	1	1	1	1	1	0	0	0	1	0	0	0	0	0	1	0	0
CPI-SS0ABC5C1B8	MIF_CD74	simple:P14174	simple:P04233	MIF	CD74	TRUE	FALSE	TRUE	I2D,InnateDB-All	FALSE	1	1	1	1	1	0.125	1	1	1	1	0.904	0.032	0.122	1	1	1	0.375	0	0.43	1	1	1	0.5	0	1	1	1	1	1	0.311	1	1	1	1	1	0.279
CPI-SS0302E8E8F	COPA_CD74	simple:P53621	simple:P04233	COPA	CD74	TRUE	FALSE	TRUE	IMEx,IntAct	FALSE	1	1	1	1	1	0.878	1	1	1	1	1	0.186	1	1	1	1	1	0.375	1	1	1	1	1	1	1	1	1	1	1	0.878	1	1	1	1	1	0.91
CPI-SS09808DEAE	APP_CD74	simple:P05067	simple:P04233	APP	CD74	FALSE	FALSE	TRUE	curated	FALSE	1	1	1	1	1	0.404	1	1	1	1	1	0.91	1	1	1	1	1	0.157	1	1	1	1	1	1	1	1	1	1	1	0.372	1	1	1	1	1	0.221
CPI-SS0241A1F57	SEMA3C_NRP2	simple:Q99985	simple:O60462	SEMA3C	NRP2	TRUE	FALSE	TRUE	curated	FALSE	1	1	1	1	1	1	1	1	1	1	1	1	0	0	1	1	1	1	1	1	1	1	1	1	1	1	1	1	1	1	1	1	1	1	1	1
CPI-SS01A07768A	JAG1_CD46	simple:P78504	simple:P15529	JAG1	CD46	FALSE	FALSE	TRUE	curated	FALSE	1	1	1	1	1	1	1	1	1	1	1	1	1	1	1	1	1	1	1	1	1	1	1	1	1	1	1	1	1	1	0	1	0	1	0	0
CPI-SS0BFB29A42	PTN_PLXNB2	simple:P21246	simple:O15031	PTN	PLXNB2	TRUE	FALSE	TRUE	I2D,IMEx,InnateDB-All,IntAct	FALSE	1	1	1	1	1	1	1	1	1	1	1	0	1	1	1	1	1	0	1	1	1	1	1	0	1	1	1	1	1	0	1	1	1	1	1	1
CPI-SS0470AF83E	EFNB1_EPHB1	simple:P98172	simple:P54762	EFNB1	EPHB1	FALSE	FALSE	TRUE	curated	FALSE	1	1	1	1	1	1	1	1	0	1	1	1	1	1	1	1	1	1	1	1	1	1	1	1	1	1	1	1	1	1	1	1	1	1	1	1
CPI-SS00046DCF3	EFNB1_EPHA4	simple:P98172	simple:P54764	EFNB1	EPHA4	FALSE	FALSE	TRUE	curated	FALSE	1	1	1	1	1	1	1	0	0	1	1	1	1	1	1	1	1	1	1	1	1	1	1	1	1	1	1	1	1	1	1	1	1	1	1	1
CPI-SS082AD7B6A	WNT5A_FZD6	simple:P41221	simple:O60353	WNT5A	FZD6	TRUE	FALSE	TRUE	curated	FALSE	1	1	1	1	1	1	1	1	1	1	1	0	1	1	1	1	1	0	1	1	1	1	1	1	1	1	1	1	1	1	1	1	1	1	1	1
CPI-SS05B1FA8A8	CKLF_LRP6	simple:Q9UBR5	simple:O75581	CKLF	LRP6	TRUE	FALSE	TRUE	IMEx,IntAct	FALSE	1	1	0.125	1	1	1	1	1	0.279	1	1	1	1	1	0	1	1	1	1	1	0.087	1	1	1	1	1	0.064	1	1	1	1	1	0.093	1	1	1
CPI-SS03A4F7DC8	GAS6_AXL	simple:Q14393	simple:P30530	GAS6	AXL	TRUE	FALSE	TRUE	guidetopharmacology.org	FALSE	1	1	1	1	1	1	1	1	1	1	1	1	1	1	1	1	1	1	1	1	1	1	1	1	1	1	1	1	1	1	1	0	1	1	1	1
CPI-CS05EAF93CC	BMP7_BMPR1A_BMPR2	simple:P18075	complex:BMPR1A_BMPR2	BMP7		TRUE	FALSE	TRUE	curated	FALSE	1	1	1	1	1	1	1	1	0	1	1	1	1	1	0	1	1	1	1	1	1	1	1	1	1	1	0	1	1	1	1	1	1	1	1	1
CPI-CS0E4E75E3B	BMP2_BMPR1A_BMPR2	simple:P12643	complex:BMPR1A_BMPR2	BMP2		TRUE	FALSE	TRUE	curated	FALSE	1	1	1	1	1	1	1	1	0	1	1	1	1	1	0	1	1	1	1	1	1	1	1	1	1	1	1	1	1	1	1	1	1	1	1	1
CPI-CS0E54FF657	BMP4_BMPR1A_BMPR2	simple:P12644	complex:BMPR1A_BMPR2	BMP4		TRUE	FALSE	TRUE	curated	FALSE	1	1	1	1	1	1	1	1	0	1	1	1	1	1	0	1	1	1	1	1	1	1	1	1	1	1	0	1	1	1	1	1	1	1	1	1
PDAC
id_cp_interaction	interacting_pair	partner_a	partner_b	gene_a	gene_b	secreted	receptor_a	receptor_b	annotation_strategy	is_integrin	CS1|CS1	CS1|CS2	CS1|CS3	CS1|CS4	CS2|CS1	CS2|CS2	CS2|CS3	CS2|CS4	CS3|CS1	CS3|CS2	CS3|CS3	CS3|CS4	CS4|CS1	CS4|CS2	CS4|CS3	CS4|CS4
CPI-SS0703338F5	LGALS9_CD44	simple:O00182	simple:P16070	LGALS9	CD44	TRUE	FALSE	TRUE	InnateDB	FALSE	0	0	0	1	0	0	0	1	0	0	0	1	0	0	0	0.189
CPI-SS0BD9F32BA	LGALS9_DAG1	simple:O00182	simple:Q14118	LGALS9	DAG1	TRUE	FALSE	TRUE	InnateDB-All	FALSE	0	0	0	0	0	0	0	0	0	0	0	0	0	0	0	0
CPI-SS05E4B1EBC	INS_INSR	simple:P01308	simple:P06213	INS	INSR	TRUE	FALSE	TRUE	curated	FALSE	1	1	1	1	1	1	1	1	1	1	1	1	0.971	1	1	0.971
CPI-SS0BC7CD11B	LGALS9_MET	simple:O00182	simple:P08581	LGALS9	MET	TRUE	FALSE	TRUE	InnateDB-All	FALSE	0	0	0	0	0	0	0	0	0	0	0	0	0	0	0	0
CPI-SS014958F32	LGALS9_CD47	simple:O00182	simple:Q08722	LGALS9	CD47	TRUE	FALSE	TRUE	InnateDB-All	FALSE	0	0	0	0	0	0	0	0	0	0	0	0	0	0	0	0
CPI-SS0A9FB762A	LGALS9_PTPRK	simple:O00182	simple:Q15262	LGALS9	PTPRK	TRUE	FALSE	TRUE	InnateDB-All	FALSE	0	0	0	0	0	0	0.064	0.064	0	0	0	0.096	0	0	0	0
CPI-SS002DF6C31	LGALS9_SLC1A5	simple:O00182	simple:Q15758	LGALS9	SLC1A5	TRUE	FALSE	TRUE	I2D,InnateDB-All	FALSE	1	1	0	1	1	1	0	1	1	1	0	1	1	1	0	1
CPI-SS09C52F54E	LGALS9_SORL1	simple:O00182	simple:Q92673	LGALS9	SORL1	TRUE	FALSE	TRUE	InnateDB-All	FALSE	0	0	1	0	0	0	1	0.093	0	0	1	0.064	0	0	1	0
CPI-SS083CBFACD	MDK_SORL1	simple:P21741	simple:Q92673	MDK	SORL1	TRUE	FALSE	TRUE	InnateDB-All	FALSE	0	0	1	0	0	0	1	0	0	0	1	0	0	0	1	0
CPI-SS02ACCF1F7	MIF_TNFRSF14	simple:P14174	simple:Q92956	MIF	TNFRSF14	TRUE	FALSE	TRUE	I2D,IntAct	FALSE	0	0	0	0	0	0	0	0	0	0	0	0	0.093	0.093	0.907	0.096
CPI-SS046F6F0C1	EFNA1_EPHA2	simple:P20827	simple:P29317	EFNA1	EPHA2	TRUE	FALSE	TRUE	curated	FALSE	0	0	0	1	0	0	0	1	0	0	0	1	0	0	0	1
CPI-SS034D36D2F	FAM3C_HLA-C	simple:Q92520	simple:HLAC	FAM3C	HLA-C	TRUE	FALSE	TRUE	InnateDB-All	FALSE	0	1	1	0	0.477	1	1	0	0.157	1	1	0	1	1	1	0.471
CPI-SS055E061C9	FAM3C_LAMP1	simple:Q92520	simple:P11279	FAM3C	LAMP1	TRUE	FALSE	TRUE	InnateDB-All	FALSE	0	0	0	0	0	0	0	0	0	0.032	0	0	0.657	0.939	0.657	0.529
CPI-SS033CB0BB2	FAM3C_CXADR	simple:Q92520	simple:P78310	FAM3C	CXADR	TRUE	FALSE	TRUE	IMEx,IntAct	FALSE	0	0	0	0	0	0	0	0	0	0	0	0	0	0	0	0
CPI-SS0ABC5C1B8	MIF_CD74	simple:P14174	simple:P04233	MIF	CD74	TRUE	FALSE	TRUE	I2D,InnateDB-All	FALSE	1	1	1	1	1	0.968	1	1	0.66	0	0.814	1	1	1	1	1
CPI-SS0898D7F7F	TNFSF10_TNFRSF10B	simple:P50591	simple:O14763	TNFSF10	TNFRSF10B	TRUE	FALSE	TRUE	curated	FALSE	0	1	1	1	0	1	1	1	0	1	1	1	0	1	1	1
CPI-SS02AFCED82	EFNA5_EPHA2	simple:P52803	simple:P29317	EFNA5	EPHA2	FALSE	FALSE	TRUE	curated	FALSE	0	0	0	1	0	0	0	1	1	1	1	1	1	1	1	1
CPI-SS0A4EE6FE1	FAM3B_LRP5	simple:P58499	simple:O75197	FAM3B	LRP5	TRUE	FALSE	TRUE	InnateDB-All	FALSE	1	0	1	0	1	0	1	0	1	0	1	0	1	0	1	0
SCC
id_cp_interaction	interacting_pair	partner_a	partner_b	gene_a	gene_b	secreted	receptor_a	receptor_b	annotation_strategy	is_integrin	CS1|CS1	CS1|CS2	CS1|CS3	CS1|CS4	CS1|CS5	CS1|CS6	CS2|CS1	CS2|CS2	CS2|CS3	CS2|CS4	CS2|CS5	CS2|CS6	CS3|CS1	CS3|CS2	CS3|CS3	CS3|CS4	CS3|CS5	CS3|CS6	CS4|CS1	CS4|CS2	CS4|CS3	CS4|CS4	CS4|CS5	CS4|CS6	CS5|CS1	CS5|CS2	CS5|CS3	CS5|CS4	CS5|CS5	CS5|CS6	CS6|CS1	CS6|CS2	CS6|CS3	CS6|CS4	CS6|CS5	CS6|CS6
CPI-SS0703338F5	LGALS9_CD44	simple:O00182	simple:P16070	LGALS9	CD44	TRUE	FALSE	TRUE	InnateDB	FALSE	1	1	1	1	1	1	1	1	1	1	1	1	1	1	1	1	1	1	1	1	1	1	1	1	1	1	1	1	1	1	0.25	0.936	0	1	1	0.189
CPI-SS06B86672A	CD44_FGFR2	simple:P16070	simple:P21802	CD44	FGFR2	TRUE	TRUE	TRUE	InnateDB-All	FALSE	1	0	1	1	0	1	1	0	1	1	0	1	1	0	1	1	0	1	1	0	1	1	0	1	1	0	1	1	0.064	1	1	0	1	1	0	1
CPI-SS0735F5C3A	TIMP1_FGFR2	simple:P01033	simple:P21802	TIMP1	FGFR2	TRUE	FALSE	TRUE	InnateDB-All	FALSE	1	1	1	1	1	1	1	0.061	1	1	0.654	1	1	0.936	1	1	1	1	1	1	1	1	1	1	1	1	1	1	1	1	1	0.256	1	1	0.439	1
CPI-SS0BF3ED143	FGFR2_FGFR3	simple:P21802	simple:P22607	FGFR2	FGFR3	TRUE	TRUE	TRUE	IMEx,InnateDB-All	FALSE	1	1	1	1	1	1	0	0	1	0	0	0	1	1	1	1	1	1	1	1	1	1	1	1	0	0	1	0	0	0	1	1	1	1	1	1
CPI-SS0B02DE712	EGFR_NRG1	simple:P00533	simple:Q02297	EGFR	NRG1	TRUE	TRUE	TRUE	I2D,IMEx,InnateDB-All,IntAct	FALSE	1	0	0	1	1	0	1	0	0	1	1	0	1	0	0	1	1	0	1	0	0	1	1	0	1	0	0	1	1	0	1	0	0	1	1	0
CPI-SS076BC3BA6	HLA-DPB1_NRG1	simple:HLADPB1	simple:Q02297	HLA-DPB1	NRG1	TRUE	TRUE	TRUE	InnateDB-All	FALSE	1	1	1	1	1	1	1	1	1	1	1	1	1	1	1	1	1	1	1	1	1	1	1	1	1	1	1	1	1	1	1	0	0	1	1	0
CPI-SS0BF9FA3F2	ERBB3_NRG1	simple:P21860	simple:Q02297	ERBB3	NRG1	TRUE	TRUE	TRUE	curated	FALSE	1	0	0	1	1	0	1	1	1	1	1	1	1	1	1	1	1	1	1	1	1	1	1	1	1	1	1	1	1	1	1	1	1	1	1	1
CPI-SS0C10824C7	EGFR_HBEGF	simple:P00533	simple:Q99075	EGFR	HBEGF	TRUE	TRUE	TRUE	curated	FALSE	1	1	1	1	1	0	1	1	1	1	1	0	1	1	1	1	1	0	1	1	1	1	1	0	1	1	1	1	1	0	1	1	1	1	1	0
CPI-SS0632A027A	CD44_HBEGF	simple:P16070	simple:Q99075	CD44	HBEGF	TRUE	TRUE	TRUE	I2D,InnateDB-All	FALSE	1	1	1	1	1	0	1	1	1	1	1	0	1	1	1	1	1	0	1	1	1	1	1	0.631	1	1	1	1	1	1	1	1	1	1	1	0
CPI-SS0F3BF2B34	CCL5_ACKR4	simple:P13501	simple:Q9NPB9	CCL5	ACKR4	TRUE	FALSE	TRUE	I2D	FALSE	1	1	1	1	1	1	1	1	1	1	1	1	1	1	0	1	1	1	1	1	1	1	1	1	1	1	1	1	1	1	1	1	1	1	1	1
CPI-SS014958F32	LGALS9_CD47	simple:O00182	simple:Q08722	LGALS9	CD47	TRUE	FALSE	TRUE	InnateDB-All	FALSE	1	1	1	1	1	1	1	1	1	1	1	1	1	1	1	1	1	1	1	1	1	1	1	1	1	1	1	1	1	1	1	0.782	0	0.032	0.218	0.032
CPI-SS0339AE950	SIRPA_CD47	simple:P78324	simple:Q08722	SIRPA	CD47	FALSE	TRUE	TRUE	curated	FALSE	1	1	1	1	1	1	1	1	1	1	1	1	1	1	1	1	1	1	1	1	1	1	1	1	1	1	1	1	1	1	0	0	0	0	0	0
CPI-SS0A9FB762A	LGALS9_PTPRK	simple:O00182	simple:Q15262	LGALS9	PTPRK	TRUE	FALSE	TRUE	InnateDB-All	FALSE	1	1	1	1	1	1	1	1	1	1	1	1	1	1	1	1	1	1	1	1	1	1	1	1	1	1	1	1	1	1	1	1	0.503	1	1	0.968
CPI-SS002DF6C31	LGALS9_SLC1A5	simple:O00182	simple:Q15758	LGALS9	SLC1A5	TRUE	FALSE	TRUE	I2D,InnateDB-All	FALSE	1	1	1	1	1	1	1	1	1	1	1	1	1	1	1	1	1	1	1	1	1	1	1	1	1	1	1	1	1	1	1	0.814	0.032	0.599	0.282	1
CPI-SS00D9A0644	FGFR2_CD83	simple:P21802	simple:Q01151	FGFR2	CD83	TRUE	TRUE	TRUE	InnateDB-All	FALSE	1	1	1	1	1	1	1	1	1	1	1	0.032	1	1	1	1	1	1	1	1	1	1	1	1	1	1	1	1	1	0.032	1	1	1	1	1	1
CPI-SS098F416C1	FGFR2_XPR1	simple:P21802	simple:Q9UBH6	FGFR2	XPR1	TRUE	TRUE	TRUE	InnateDB-All	FALSE	1	1	1	1	1	1	1	1	0	1	1	1	1	1	1	1	1	1	1	1	1	1	1	1	1	1	0	1	1	1	1	1	1	1	1	1
CPI-SS0B99F22A2	JAG1_NOTCH3	simple:P78504	simple:Q9UM47	JAG1	NOTCH3	FALSE	FALSE	TRUE	curated	FALSE	0	1	1	1	0	1	0	1	1	1	0	1	0	1	1	1	0	1	0	1	1	1	0	1	0	1	1	1	0	1	0	1	1	1	0	1
CPI-SS02ACCF1F7	MIF_TNFRSF14	simple:P14174	simple:Q92956	MIF	TNFRSF14	TRUE	FALSE	TRUE	I2D,IntAct	FALSE	1	1	1	1	1	0	1	1	1	1	1	0	1	1	1	1	1	0	1	1	1	1	1	0	1	1	1	1	1	0	1	1	1	1	1	0.029
CPI-SS0708FE6FF	NRG1_LSR	simple:Q02297	simple:Q86X29	NRG1	LSR	TRUE	TRUE	TRUE	InnateDB-All	FALSE	1	1	1	1	1	1	0	0	0	0	0	0	0	0	0	0	0	0	1	1	1	1	1	1	1	1	1	1	1	1	0	0	0	0	0	0
CPI-SS0E075E5AF	NRG1_NETO2	simple:Q02297	simple:Q8NC67	NRG1	NETO2	TRUE	TRUE	TRUE	InnateDB-All	FALSE	1	1	1	1	1	1	1	0	1	1	0	1	1	0	1	1	0	1	1	1	1	1	1	1	1	1	1	1	1	1	1	0	1	1	0	1
CPI-SS0F739D3DB	ANXA1_FPR1	simple:P04083	simple:P21462	ANXA1	FPR1	TRUE	FALSE	TRUE	guidetopharmacology.org	FALSE	1	1	1	1	1	0.907	1	1	1	1	1	0	1	1	1	1	1	0	1	1	1	1	1	0	1	1	1	1	1	0	1	1	1	1	1	0
CPI-SS06CCF5A54	ANXA1_FPR3	simple:P04083	simple:P25089	ANXA1	FPR3	TRUE	FALSE	TRUE	guidetopharmacology.org	FALSE	1	1	1	1	1	1	1	1	1	1	1	0	1	1	1	1	1	0	1	1	1	1	1	0	1	1	1	1	1	0.407	1	1	1	1	1	0
CPI-SS01560CA22	CD99_PILRA	simple:P14209	simple:Q9UKJ1	CD99	PILRA	TRUE	FALSE	TRUE	curated	FALSE	1	1	1	1	1	1	1	1	1	1	1	0	1	1	1	1	1	0	1	1	1	1	1	0	1	1	1	1	1	0	1	1	1	1	1	0
CPI-SS034D36D2F	FAM3C_HLA-C	simple:Q92520	simple:HLAC	FAM3C	HLA-C	TRUE	FALSE	TRUE	InnateDB-All	FALSE	1	1	0	1	1	0	1	1	0	1	1	0	1	1	0	1	1	0	1	1	0	1	1	0	1	1	0	1	1	0	1	1	0	1	1	0
CPI-SS055E061C9	FAM3C_LAMP1	simple:Q92520	simple:P11279	FAM3C	LAMP1	TRUE	FALSE	TRUE	InnateDB-All	FALSE	0	0	0	0	0	0	0	0	0	0	0	0	0	0	0	0	0	0	0	0	0	0	0	0	0	0	0	0	0	0	0	0	0	0	0	0
CPI-SS033CB0BB2	FAM3C_CXADR	simple:Q92520	simple:P78310	FAM3C	CXADR	TRUE	FALSE	TRUE	IMEx,IntAct	FALSE	0	0	0	0	0	0	0	0	0	0	0	0	0	0	0	0	0	0	0	0	0	0	0	0	0	0	0	0	0	0	0	0	0	0	0	0
CPI-SS0C17BB772	CXCL9_FCGR2A	simple:Q07325	simple:P12318	CXCL9	FCGR2A	TRUE	FALSE	TRUE	IMEx,IntAct	FALSE	1	1	1	1	1	1	1	1	1	1	1	1	1	1	1	1	1	0	1	1	1	1	1	1	1	1	1	1	1	1	1	1	1	1	1	0
CPI-SS0055264F3	TGFB1_EGFR	simple:P01137	simple:P00533	TGFB1	EGFR	TRUE	FALSE	TRUE	IMEx,InnateDB-All,MINT	FALSE	1	1	1	1	1	1	0	0	0	0	0	0	0	0	0	0	0	0	1	1	1	1	1	1	1	1	1	1	1	1	0	0	0	0	0	0
CPI-SS00EDDD458	MIF_EGFR	simple:P14174	simple:P00533	MIF	EGFR	TRUE	FALSE	TRUE	IMEx,InnateDB-All	FALSE	0	0	0	0	0	0	0	0	0	0	0	0	0	0	0	0	0	0	0	0	0	0	0	0	0	0	0	0	0	0	0	0	0	0	0	0
CPI-SS0ABC5C1B8	MIF_CD74	simple:P14174	simple:P04233	MIF	CD74	TRUE	FALSE	TRUE	I2D,InnateDB-All	FALSE	1	1	1	1	1	0	1	1	1	1	1	0	1	1	1	1	1	0	1	1	1	1	1	0	1	1	1	1	1	0	1	1	1	1	1	0
CPI-SS08CA619FE	GRN_EGFR	simple:P28799	simple:P00533	GRN	EGFR	TRUE	FALSE	TRUE	InnateDB-All	FALSE	1	1	1	1	1	1	0.064	0	0.936	1	0	0.756	0.593	0.093	1	1	0.439	1	1	1	1	1	1	1	1	1	1	1	1	1	0	0	0	0	0	0
CPI-SS0DA033F03	GRN_TNFRSF1A	simple:P28799	simple:P19438	GRN	TNFRSF1A	TRUE	FALSE	TRUE	IMEx,InnateDB-All,MINT	FALSE	1	1	1	1	1	1	1	1	0.753	1	1	1	1	1	0.968	1	1	1	1	1	1	1	1	1	1	1	1	1	1	1	0.25	0	0	0.314	0.029	0.25
CPI-SS088A0A760	COPA_EGFR	simple:P53621	simple:P00533	COPA	EGFR	TRUE	FALSE	TRUE	InnateDB-All	FALSE	0	0	0	0	0	0	0	0	0	0	0	0	0	0	0	0	0	0	0	0	0	0	0	0	0	0	0	0	0	0	0	0	0	0	0	0
CPI-SS0302E8E8F	COPA_CD74	simple:P53621	simple:P04233	COPA	CD74	TRUE	FALSE	TRUE	IMEx,IntAct	FALSE	1	1	1	1	1	0	1	1	1	1	1	0	1	1	1	1	1	0	1	1	1	1	1	0	1	1	1	1	1	0	1	1	1	1	1	0
CPI-SS05D23BCE8	TNFSF13B_HLA-DPB1	simple:Q9Y275	simple:HLADPB1	TNFSF13B	HLA-DPB1	TRUE	FALSE	TRUE	InnateDB-All	FALSE	1	1	1	1	1	1	1	1	1	1	1	1	1	1	1	1	1	1	1	1	1	1	1	1	1	1	1	1	1	1	1	1	1	1	1	0
CPI-SS03133B4F2	TNFSF13B_TFRC	simple:Q9Y275	simple:P02786	TNFSF13B	TFRC	TRUE	FALSE	TRUE	IMEx,IntAct	FALSE	1	1	1	1	1	1	1	1	1	1	1	1	1	1	1	1	1	1	1	1	1	1	1	1	1	1	1	1	1	1	1	1	1	0	1	1
CPI-SS0F00D756A	TNFSF13B_CD40	simple:Q9Y275	simple:P25942	TNFSF13B	CD40	TRUE	FALSE	TRUE	I2D,InnateDB	FALSE	1	1	1	1	1	1	1	1	1	1	1	1	1	1	1	1	1	1	1	1	1	1	1	1	1	1	1	1	1	1	1	1	1	1	1	0
CPI-SS09808DEAE	APP_CD74	simple:P05067	simple:P04233	APP	CD74	FALSE	FALSE	TRUE	curated	FALSE	1	1	1	1	1	0	1	1	1	1	1	0	1	1	1	1	1	0	1	1	1	1	1	0	1	1	1	1	1	0	1	1	1	1	1	0
CPI-SS0E00478B4	VEGFA_NRP2	simple:P15692	simple:O60462	VEGFA	NRP2	TRUE	FALSE	TRUE	curated	FALSE	1	1	1	1	1	1	1	1	1	1	1	1	1	1	1	1	1	1	1	1	1	1	1	1	1	1	1	1	1	1	1	1	0	1	1	1
CPI-SS0D22A09AD	PGF_NRP2	simple:P49763	simple:O60462	PGF	NRP2	TRUE	FALSE	TRUE	curated	FALSE	1	1	0	1	1	1	1	1	0	1	1	1	1	1	1	1	1	1	1	1	1	1	1	1	1	1	1	1	1	1	1	1	1	1	1	1
CPI-SS0241A1F57	SEMA3C_NRP2	simple:Q99985	simple:O60462	SEMA3C	NRP2	TRUE	FALSE	TRUE	curated	FALSE	1	1	1	1	1	1	1	1	0	1	1	1	1	1	1	1	1	1	1	1	1	1	1	1	1	1	1	1	1	1	1	1	1	1	1	1
CPI-SS0C4D54E39	JAG2_NOTCH3	simple:Q9Y219	simple:Q9UM47	JAG2	NOTCH3	FALSE	FALSE	TRUE	curated	FALSE	1	1	1	1	1	1	0	1	1	1	0	1	1	1	1	1	1	1	1	1	1	1	1	1	1	1	1	1	1	1	1	1	1	1	1	1
CPI-SS0FA326344	WNT4_FZD6	simple:P56705	simple:O60353	WNT4	FZD6	TRUE	FALSE	TRUE	curated	FALSE	1	1	1	1	1	1	0	0	0	0	0	0	1	1	1	1	1	1	1	1	1	1	1	1	1	1	1	1	1	1	1	1	1	1	1	1
CPI-SS01A07768A	JAG1_CD46	simple:P78504	simple:P15529	JAG1	CD46	FALSE	FALSE	TRUE	curated	FALSE	0	0	0	0	0	0	0	0	0	0	0	0	0	0	0	0	0	0	0	0	0	0	0	0	0	0	0	0	0	0	0	0	0	0	0	0
CPI-SS0DC4D593E	EFNB1_EPHB6	simple:P98172	simple:O15197	EFNB1	EPHB6	TRUE	FALSE	TRUE	curated	FALSE	0	0	1	1	1	0	0	0	1	1	1	0	0	0	1	1	1	0	0	0	1	1	1	0	0	0	1	1	1	0	0	0	1	1	1	0
CPI-SS079728E8B	ENTPD1_ADORA2B	simple:P49961	simple:P29275	ENTPD1	ADORA2B	FALSE	FALSE	TRUE	curated	FALSE	1	1	1	1	1	1	1	1	1	1	1	1	1	1	1	1	1	1	1	1	1	1	1	1	1	1	1	1	1	1	1	1	1	1	0.064	1
CPI-SS0D2539AEB	HEBP1_FPR3	simple:Q9NRV9	simple:P25089	HEBP1	FPR3	FALSE	FALSE	TRUE	guidetopharmacology.org	FALSE	1	1	1	1	1	1	1	1	1	1	1	1	1	1	1	1	1	1	1	1	1	1	1	0.311	1	1	1	1	1	0	1	1	1	1	1	0.346
CPI-SS06CBC985C	LTB_LTBR	simple:Q06643	simple:P36941	LTB	LTBR	FALSE	FALSE	TRUE	curated	FALSE	1	1	1	1	1	1	1	1	1	1	1	1	1	1	1	1	1	1	1	1	1	1	1	1	1	1	1	1	1	1	0.689	1	1	0.753	1	1
CPI-SC0E5218AA4	a6b4 complex_NRG1	complex:a6b4 complex	simple:Q02297		NRG1	TRUE	FALSE	TRUE	curated	TRUE	1	0	0	1	1	0	1	0	0	1	1	0	1	0	0	1	1	0	1	0	0	1	1	0	1	0	0	1	1	0	1	0	0	1	1	0

## Sheet: 5-2
Table 5-2.The ligand receptor pairs between cancer cells and endothelial cells.
BC	E-CS2	CPI-SS002DF6C31	LGALS9_SLC1A5	LGALS9	SLC1A5	PDAC	C-E	CPI-SS05E4B1EBC	INS_INSR	INS	INSR
	E-CS2	CPI-SS0A9FB762A	LGALS9_PTPRK	LGALS9	PTPRK		C-E	CPI-SS0A9FB762A	LGALS9_PTPRK	LGALS9	PTPRK
	E-CS2	CPI-SS014958F32	LGALS9_CD47	LGALS9	CD47		C-E	CPI-SS0EBFE1854	EFNA1_EPHA4	EFNA1	EPHA4
	E-C	CPI-SS060B82BBC	JAG1_NOTCH2	JAG1	NOTCH2		C-E	CPI-SS0C03F7CDC	VEGFA_KDR	VEGFA	KDR	VEGFR2
	E-C	CPI-SS027CDEA08	DLL4_NOTCH2	DLL4	NOTCH2		C-E	CPI-SS0B9B3870A	VEGFA_FLT1	VEGFA	FLT1	VEGFR1
	E-C	CPI-SS060B82BBC	JAG1_NOTCH2	JAG1	NOTCH2		C-E	CPI-SS034D36D2F	FAM3C_HLA-C	FAM3C	HLA-C
	E-C	CPI-SS0579FA162	IGF2_IGF1R	IGF2	IGF1R		C-E	CPI-SS055E061C9	FAM3C_LAMP1	FAM3C	LAMP1
SCC	E-C	CPI-SS06F83AE58	SELE_CD44	SELE	CD44		C-E	CPI-SS0ABC5C1B8	MIF_CD74	MIF	CD74
	E-C	CPI-SS055E061C9	FAM3C_LAMP1	FAM3C	LAMP1		C-E	CPI-SS0302E8E8F	COPA_CD74	COPA	CD74
	E-C	CPI-SS033CB0BB2	FAM3C_CXADR	FAM3C	CXADR		C-E	CPI-SS09808DEAE	APP_CD74	APP	CD74
	E-C	CPI-SS014958F32	LGALS9_CD47	LGALS9	CD47		C-E	CPI-SS0DA033F03	GRN_TNFRSF1A	GRN	TNFRSF1A
	E-C	CPI-SS002DF6C31	LGALS9_SLC1A5	LGALS9	SLC1A5		C-E	CPI-SS0DE0A486F	VEGFA_NRP1	VEGFA	NRP1
	E-CS6	CPI-SS0302E8E8F	COPA_CD74	COPA	CD74	LC	C-E	CPI-SS09808DEAE	APP_CD74	APP	CD74
PDAC	E-C	CPI-SS01A07768A	JAG1_CD46	JAG1	CD46		CS3-E	CPI-SS05B7D3407	CCL5_ACKR1	CCL5	ACKR1
	E-C	CPI-SS09808DEAE	APP_CD74	APP	CD74		CS1-E	CPI-SS0B9B3870A	VEGFA_FLT1	VEGFA	FLT1
	E-C	CPI-SS02AB0C3E0	SPP1_CD44	SPP1	CD44		CS1-E	CPI-SS0DE0A486F	VEGFA_NRP1	VEGFA	NRP1	VEGF165R
	E-CS1/2/3	CPI-SS0632A027A	HBEGF_CD44	HBEGF	CD44	SCC	C-E	CPI-SS0ABC5C1B8	MIF_CD74	MIF	CD74
	E-CS1/2/3	CPI-SS046F6F0C1	EFNA1_EPHA2	EFNA1	EPHA2	BC	C-E	CPI-SS059EEFDC6	MIF_TNFRSF10D	MIF	TNFRSF10D
	E-CS1/2/4	CPI-SS05E4B1EBC	INS_INSR	INS	INSR	CRC	C-E	CPI-SS052BBD9F9	CXCL1_ACKR1	CXCL1	ACKR1
CRC	E-C	CPI-SS046F6F0C1	EFNA1_EPHA2	EFNA1	EPHA2		C-E	CPI-SS0D4C221B8	AREG_ICAM1	AREG	ICAM1
	E-C	CPI-SS033CB0BB2	FAM3C_CXADR	FAM3C	CXADR
	E-C	CPI-SS01A07768A	JAG1_CD46	JAG1	CD46
	E-C	CPI-SS002DF6C31	LGALS9_SLC1A5	LGALS9	SLC1A5
LC	E-CS1	CPI-SS0938C6980	DLL4_NOTCH3	DLL4	NOTCH3
	E-CS1/2	CPI-SS0DA033F03	GRN_TNFRSF1A	GRN	TNFRSF1A
	E-CS1/2	CPI-SS0BC7CD11B	LGALS9_MET	LGALS9	MET
	E-CS3	CPI-SS09808DEAE	APP_CD74	APP	CD74
	F-CS1/2	CPI-SS0DA033F03	GRN_TNFRSF1A	GRN	TNFRSF1A
OV	E-CS1/3/5/6	CPI-SS01A07768A	JAG1_CD46	JAG1	CD46
	E-CS1/5/6	CPI-SS09808DEAE	APP_CD74	APP	CD74
	E-CS1/2/3/5/6	CPI-SS033CB0BB2	FAM3C_CXADR	FAM3C	CXADR
	E-CS1/5/6	CPI-SS09808DEAE	APP_CD74	APP	CD74
	E-CS2/3	CPI-SS0B99F22A2	JAG1_NOTCH3	JAG1	NOTCH3
	E-CS2/3	CPI-SS087E0E3FB	EFNB2_EPHA4	EFNB2	EPHA4
	E-CS2/3	CPI-SS0EBFE1854	EFNA1_EPHA4	EFNA1	EPHA4
	E-CS3	CPI-SS0BFD8E056	EFNB2_EPHB1	EFNB2	EPHB1
	E-CS2	CPI-SS03A4F7DC8	GAS6_AXL	GAS6	AXL
	E-CS2	CPI-SS048346C2B	LGALS9_MRC2	LGALS9	MRC2
	E-CS3	CPI-SS0BD9F32BA	LGALS9_DAG1	LGALS9	DAG1

## Sheet: 5-3
Table 5-3. The ligand receptor pairs from cancer to myeloid cells.
Cancer type	myeloid/ fibroblast cells to T cells	id_cp_interaction	interacting_pair	gene_a	gene_b
BC	C-FS2	CPI-SS00EDDD458	MIF_EGFR	MIF	EGFR
	C-FS5	CPI-SS00EDDD458	MIF_EGFR	MIF	EGFR
	C-MS2	CPI-SS04F3A1E5C	COPA_SORT1	COPA	SORT1
	C-MS2	CPI-SS04F3A1E5C	COPA_SORT1	COPA	SORT1
OV	C-F-S4	CPI-SS00EDDD458	MIF_EGFR	MIF	EGFR
	C-F-S4	CPI-SS088A0A760	COPA_EGFR	COPA	EGFR
	C-M-S1/3/5	CPI-SS01946BE5C	RPS19_C5AR1	RPS19	C5AR1
	C-MS1/3/4/5	CPI-SS0339AE950	CD47_SIRPA	CD47	SIRPA
	CS-1/2/3/5/6-M-S1/3/5	CPI-SS055E061C9	FAM3C_LAMP1	FAM3C	LAMP1
	CS-1/2/3/4/5-M-S1/3/5	CPI-SS006C6537E	MDK_LRP1	MDK	LRP1
SCC	C-M-S7	CPI-SS00EDDD458	MIF_EGFR	MIF	EGFR
	C-M-S1	CPI-SS01560CA22	CD99_PILRA	CD99	PILRA
	C-M-S3	CPI-SS01560CA22	CD99_PILRA	CD99	PILRA
	C-M-S7	CPI-SS01560CA22	CD99_PILRA	CD99	PILRA
	C-M-S3	CPI-SS01946BE5C	RPS19_C5AR1	RPS19	C5AR1
	C-M-S7	CPI-SS033CB0BB2	FAM3C_CXADR	FAM3C	CXADR
	C-M-S1	CPI-SS03A4F7DC8	GAS6_AXL	GAS6	AXL
	C-M-S3	CPI-SS03A4F7DC8	GAS6_AXL	GAS6	AXL
	C-M-S7	CPI-SS03A4F7DC8	GAS6_AXL	GAS6	AXL
	C-M-S3	CPI-SS055E061C9	FAM3C_LAMP1	FAM3C	LAMP1
	C-M-S7	CPI-SS088A0A760	COPA_EGFR	COPA	EGFR
	C-M-S3	CPI-SS0A76A8E97	HLA-F_LILRB2	HLA-F	LILRB2
	C-M-S7	CPI-SS0A76A8E97	HLA-F_LILRB2	HLA-F	LILRB2
	C-M-S1	CPI-SS0F739D3DB	ANXA1_FPR1	ANXA1	FPR1
	C-M-S3	CPI-SS0F739D3DB	ANXA1_FPR1	ANXA1	FPR1
	C-M-S7	CPI-SS0F739D3DB	ANXA1_FPR1	ANXA1	FPR1
	C(2-6)-M-S1	CPI-SS00150FB64	HLA-F_LILRB1	HLA-F	LILRB1
	C(2-6)-M-S3	CPI-SS00150FB64	HLA-F_LILRB1	HLA-F	LILRB1
	C(2/3/6)-M-S7	CPI-SS0708FE6FF	NRG1_LSR	NRG1	LSR
	C(1/2)-M-S3	CPI-SS0855C0353	PGF_NRP1	PGF	NRP1
	C(2/3/6)-M-S1	CPI-SS0978D28AB	NRG1_MS4A4A	NRG1	MS4A4A
	C(2/3/6)-M-S3	CPI-SS0978D28AB	NRG1_MS4A4A	NRG1	MS4A4A
	C(2/3/6)-M-S7	CPI-SS0978D28AB	NRG1_MS4A4A	NRG1	MS4A4A
CRC	C-FS1/3/4/5	CPI-SS006C6537E	MDK_LRP1	MDK	LRP1
	C-MS1/3/5	CPI-SS006C6537E	MDK_LRP1	MDK	LRP1
	C-MS1/3/5	CPI-SS01946BE5C	RPS19_C5AR1	RPS19	C5AR1
	C-MS1/3/5	CPI-SS09808DEAE	APP_CD74	APP	CD74
	CS1/2/4/5/6-MS1/3/5	CPI-SS0E23CEB91	LGALS9_HAVCR2	LGALS9	HAVCR2
PDAC	C-MS2	CPI-SS0DE0A486F	VEGFA_NRP1	VEGFA	NRP1
	C-MS2	CPI-SS02AB0C3E0	SPP1_CD44	SPP1	CD44
LC	C-FS1	CPI-SS006C6537E	MDK_LRP1	MDK	LRP1
	C-FS2	CPI-SS006C6537E	MDK_LRP1	MDK	LRP1
	C-FS4	CPI-SS006C6537E	MDK_LRP1	MDK	LRP1
	C-FS2	CPI-SS0D4C221B8	AREG_ICAM1	AREG	ICAM1
	CS1-MS3	CPI-SS034D36D2F	FAM3C_HLA-C	FAM3C	HLA-C
	CS1-MS7	CPI-SS034D36D2F	FAM3C_HLA-C	FAM3C	HLA-C
	CS1-MS1	CPI-SS0DE0A486F	VEGFA_NRP1	VEGFA	NRP1
	CS1-MS1	CPI-SS0E00478B4	VEGFA_NRP2	VEGFA	NRP2
	C-M-S1	CPI-SS006C6537E	MDK_LRP1	MDK	LRP1
	C-M-S3	CPI-SS006C6537E	MDK_LRP1	MDK	LRP1
	C-M-S3	CPI-SS030BB46BB	ANXA1_FPR2	ANXA1	FPR2
	C-M-S3	CPI-SS07CCAD9BF	GRN_SORT1	GRN	SORT1

## Sheet: 5-4
Tbale 5-4. The ligand receptor pairs from myeloid/ fibroblast cells to T cells
Cancer type	myeloid/ fibroblast cells to T cells	id_cp_interaction	interacting_pair	gene_a	gene_b
BC	MS1-CD4/CD8	CPI-SS02246DA17	CXCL9_CXCR3	CXCL9	CXCR3
	MS1-CD4/CD8	CPI-SS080683E15	CXCL10_CXCR3	CXCL10	CXCR3
	MS1-CD4/CD8	CPI-SS09FAC4977	CXCL11_CXCR3	CXCL11	CXCR3
	F-CD4-S5	CPI-SS0E2431C09	FAM3C_PDCD1	FAM3C	PDCD1
	F-CD8-S2/3/7	CPI-SS0E2431C09	FAM3C_PDCD1	FAM3C	PDCD1
	DC-CD4-S4/5	CPI-SS0A83A7E30	TNFSF13_FAS	TNFSF13	FAS
	M-CD4-S4/5	CPI-SS0A83A7E30	TNFSF13_FAS	TNFSF13	FAS
	M-CD4-S4/5	CPI-SS08B7D54A3	TNF_FAS	TNF	FAS
	FS5-CD4/CD8	CPI-SS09FAC4977	CXCL11_CXCR3	CXCL11	CXCR3
	FS5-CD4/CD8	CPI-SS080683E15	CXCL10_CXCR3	CXCL10	CXCR3
	DC-CD8-S2	CPI-SS0F9B3B259	TNFSF13_TNFRSF1A	TNFSF13	TNFRSF1A
	M-CD8-S2	CPI-SS0F9B3B259	TNFSF13_TNFRSF1A	TNFSF13	TNFRSF1A
	F-CD4/CD8/NK	CPI-SS0EFE0B07A	CXCL12_CXCR3	CXCL12	CXCR3
	FS1/2/5-CD8	CPI-SS0EF0750A7	OGN_HLA-DRB1	OGN	HLA-DRB1
	F-CD4/CD8/NK<CD4-S8>	CPI-SS0E9A581F8	ICAM1_ITGAL	ICAM1	ITGAL
	DC-S3-CD4/CD8/NK	CPI-SS0E7D5974D	TNF_TNFRSF1B	TNF	TNFRSF1B
	M-S3-CD4/CD8/NK	CPI-SS0E7D5974D	TNF_TNFRSF1B	TNF	TNFRSF1B
	F-CD4/CD8	CPI-SS0C4E86714	GRN_TNFRSF1B	GRN	TNFRSF1B
	M-CD4/CD8	CPI-SS0C28FEC7D	TNFSF13_TNFRSF14	TNFSF13	TNFRSF14
	FS5-CD4/CD8	CPI-SS0A28DCA72	CXCL12_CXCR4	CXCL12	CXCR4
	DC-S5-CD4/8	CPI-SS087321EB5	SELL_SELPLG	SELL	SELPLG
	MS1/4-CD4/CD8	CPI-SS0632A027A	HBEGF_CD44	HBEGF	CD44
	DC/M-CD4/CD8<CD4-S1>	CPI-SS05D23BCE8	TNFSF13B_HLA-DPB1	TNFSF13B	HLA-DPB1
	FS1/2/5-CD4/CD8	CPI-SS055E061C9	FAM3C_LAMP1	FAM3C	LAMP1
	DC-S3-CD8-S2	CPI-SS04B4619D0	TNF_TNFRSF1A	TNF	TNFRSF1A
	MS1/2-CD8-S2	CPI-SS04B4619D0	TNF_TNFRSF1A	TNF	TNFRSF1A
	DC-S3-CD4-S/4/5/8	CPI-SS03B8E2D7A	TNF_ICOS	TNF	ICOS
	M-CD4-S/4/5/8	CPI-SS03B8E2D7A	TNF_ICOS	TNF	ICOS
	F-CD4/CD8/NK	CPI-SS034D36D2F	FAM3C_HLA-C	FAM3C	HLA-C
	M-CD8-S2	CPI-SS00F282936	CXCL16_CXCR6	CXCL16	CXCR6
	M-CD4-S4/5	CPI-SS00F282936	CXCL16_CXCR6	CXCL16	CXCR6
CRC	DC/MS1/2/3-CD8-S4/10	CPI-SS0F8C664D9	CCL20_CXCR3	CCL20	CXCR3
	F-CD4-S9	CPI-SS0E2431C09	FAM3C_PDCD1	FAM3C	PDCD1
	F-CD8-S3	CPI-SS0E2431C09	FAM3C_PDCD1	FAM3C	PDCD1
	DC/M-CD8-S3/10	CPI-SS0E23CEB91	LGALS9_HAVCR2	LGALS9	HAVCR2
	DC/M-CD4-S2/5/6	CPI-SS00F282936	CXCL16_CXCR6	CXCL16	CXCR6
	DC/M-CD8-S3	CPI-SS00F282936	CXCL16_CXCR6	CXCL16	CXCR6
	MS1/2-CD4		TNF_ICOS	TNF	ICOS
	MS1/2-CD8-S3		TNF_ICOS	TNF	ICOS
LC	FS1/2-CD4-S6	CPI-SS0E2431C09	FAM3C_PDCD1	FAM3C	PDCD1
	FS1/2-CD8-S1/3/5	CPI-SS0E2431C09	FAM3C_PDCD1	FAM3C	PDCD1
	M-CD8-S1/3/5	CPI-SS0E23CEB91	LGALS9_HAVCR2	LGALS9	HAVCR2
	MS5-CD8-S1/3/5	CPI-SS0F8C664D9	CCL20_CXCR3	CCL20	CXCR3
	MS2-CD8-S1/3/5	CPI-SS080683E15	CXCL10_CXCR3	CXCL10	CXCR3
	FS1/2/4-CD8-S1/3/5	CPI-SS0EFE0B07A	CXCL12_CXCR3	CXCL12	CXCR3
	DC/M-CD4-S4	CPI-SS00F282936	CXCL16_CXCR6	CXCL16	CXCR6
	DC/M-CD8-S1/3/5	CPI-SS00F282936	CXCL16_CXCR6	CXCL16	CXCR6
	MS1/2/5-CD4		MIF_TNFRSF14	MIF	TNFRSF14
	M-CD4/CD8		LGALS9_CD47	LGALS9	CD47
	MS3-CD4/CD8		SIRB1 complex_CD47
OV	MS3-CD4-S4/5	CPI-SS080683E15	CXCL10_CXCR3	CXCL10	CXCR3
	MS3-CD8-S2	CPI-SS080683E15	CXCL10_CXCR3	CXCL10	CXCR3
	MS5-CD4-S4/5	CPI-SS0F8C664D9	CCL20_CXCR3	CCL20	CXCR3
	MS5-CD8-S2	CPI-SS0F8C664D9	CCL20_CXCR3	CCL20	CXCR3
	F/M-CD4-S4	CPI-SS095DCA7F7	BST2_LILRA4	BST2	LILRA4
	M-CD8-S2	CPI-SS00F282936	CXCL16_CXCR6	CXCL16	CXCR6
	F-CD4-S4/5	CPI-SS0EFE0B07A	CXCL12_CXCR3	CXCL12	CXCR3
	F-CD8-S2	CPI-SS0EFE0B07A	CXCL12_CXCR3	CXCL12	CXCR3
	M-CD4-S1	CPI-SS0C1BD22BC	SPP1_PTGER4	SPP1	PTGER4
	F-CD4-S4/5		APP_CD74	APP	CD74
	F-CD8-S2		APP_CD74	APP	CD74
	FS1/3/4-CD4-S4/5		COPA_CD74	COPA	CD74
	FS1/3/4-CD8-S2		COPA_CD74	COPA	CD74
	F/M-CD4-S5		GRN_TNFRSF1B	GRN	TNFRSF1B
	F/M-CD8-S2		GRN_TNFRSF1B	GRN	TNFRSF1B
	M-CD4-S4		LAIR1_LILRB4	LAIR1	LILRB4
	F-CD4/8		CXCL12_CXCR4	CXCL12	CXCR4
	M-CD4-S5		MIF_TNFRSF14	MIF	TNFRSF14
	M-CD4/5		SIRPA_CD47	SIRPA	CD47
	M-CD4/5		LGALS9_CD47	LGALS9	CD47
PDAC	FS1/2/3/5-CD4/CD8	CPI-SS0A28DCA72	CXCL12_CXCR4	CXCL12	CXCR4
	M-CD8-S1		CXCL16_CXCR6	CXCL16	CXCR6
	MS4-CD4-S2/3/5		CCL19_CCR7	CCL19	CCR7
	F/M-CD4-S5		APP_CD74	APP	CD74
	F/M-CD4-S5		COPA_CD74	COPA	CD74
	M-CD8-S1/CD4-S4		GRN_TNFRSF1B	GRN	TNFRSF1B
	F-CD4/S4		FAM3C_PDCD1	FAM3C	PDCD1
	FS4/S6-CD4-S2/4		TNFSF12_TNFRSF25	TNFSF12	TNFRSF25
	MS1-CD4-S2/4		TNFSF12_TNFRSF25	TNFSF12	TNFRSF25
	MS1/2-CD4/CD8		SIRPA_CD47	SIRPA	CD47
	MS4-CD4-S2/3/5		CCL21_CCR7	CCL21	CCR7
SCC	MS4-CD4-S4	CPI-SS0F5B6B186	PDCD1LG2_PDCD1	PDCD1LG2	PDCD1
CD4S1-Treg	MS4-CD8-S2	CPI-SS0F5B6B186	PDCD1LG2_PDCD1	PDCD1LG2	PDCD1
	MS4-CD4-S4	CPI-SS016EE0084	CD274_PDCD1	CD274	PDCD1
	MS4-CD8-S2	CPI-SS016EE0084	CD274_PDCD1	CD274	PDCD1
	DC/M-CD4	CPI-SS0E23CEB91	LGALS9_HAVCR2	LGALS9	HAVCR2
	DC/M-CD8-S2	CPI-SS0E23CEB91	LGALS9_HAVCR2	LGALS9	HAVCR2
	M-CD4/CD8-S3	CPI-SS02246DA17	CXCL9_CXCR3	CXCL9	CXCR3
	M-CD4/CD8-S3	CPI-SS080683E15	CXCL10_CXCR3	CXCL10	CXCR3
	MS7-CD4/CD8-S3	CPI-SS09FAC4977	CXCL11_CXCR3	CXCL11	CXCR3
	MS4-CD4-S4	CPI-SS098EFF959	CCL19_CCR7	CCL19	CCR7
	DC-CD4-S1	CPI-SS08B7D54A3	TNF_FAS	TNF	FAS
	DC-S5-CD4-S1/4	CPI-SS087321EB5	SELL_SELPLG	SELL	SELPLG
	DC-CD4	CPI-SS03B8E2D7A	TNF_ICOS	TNF	ICOS
	DC-CD8-S2	CPI-SS03B8E2D7A	TNF_ICOS	TNF	ICOS
	M-CD8-S2	CPI-SS03133B4F2	TNFSF13B_TFRC	TNFSF13B	TFRC
	M-CD4	CPI-SS03133B4F2	TNFSF13B_TFRC	TNFSF13B	TFRC
	F-CD4	CPI-SS02ACCF1F7	MIF_TNFRSF14	MIF	TNFRSF14
	F-CD8-S3	CPI-SS02ACCF1F7	MIF_TNFRSF14	MIF	TNFRSF14
	DC/M-CD4	CPI-SS00F282936	CXCL16_CXCR6	CXCL16	CXCR6
	DC/M-CD8-S2	CPI-SS00F282936	CXCL16_CXCR6	CXCL16	CXCR6
	M-CD4-S1	CPI-CS0DEBE7B69	IL1RN_IL1 receptor	IL1RN	IL1 receptor
	MS1/3/7-CD4-S1	CPI-CS05426BFFA	IL1B_IL1 receptor	IL1B	IL1 receptor
	MS4-CD4-S41/S4		IL15_IL15 receptor	IL15	IL15RA
	MS4-CD8-S2		IL15_IL15 receptor	IL15	IL15RA
