# Supplementary material for: Characterizing Intercellular Communication of Pan-Cancer Reveals SPP1+ Tumor-Associated Macrophage Expanded in Hypoxia and Promoting Cancer Malignancy Through Single-Cell RNA-Seq Data
Source: Front Cell Dev Biol. 2021 Oct 5;9:749210. doi: 10.3389/fcell.2021.749210 (PMC8523849; doi:10.3389/fcell.2021.749210)
Supplement: Supplementary file 6 [file Table_6.XLSX]

## Sheet: Table 6-1
Table 6-1.The proportion of each cell subcluster in BC patients.
BC
	CS1	CS2	CD8-S2	CD4-S1	NK-S6	CD8-S3	CD4-S4	CD4-S5	CD8-S7	CD4-S8	DC-S3	M-S2	DC-S5	M-S1	Mon-S4	FS1	FS2	FS3	FS4	FS5
41			0.281195	0.33802	0.0515524	0.172232	0.0615114	0.0386643	0.0316344	0.0251904	0.495726	0.282051	0.162393	0.0512821	0.00854701	0.346369	0.425978	0.115922	0.0865922	0.0251397
42	0.952	0.048	0.228641	0.252238	0.0439382	0.179821	0.0878763	0.134255	0.0398698	0.0333605	0.0879121	0.373626	0	0.538462	0	0.406897	0.32069	0.189655	0.0482759	0.0344828
43	0.955	0.045	0.258324	0.208955	0.0442021	0.19116	0.117107	0.107348	0.043054	0.0298507	0.0184615	0.00153846	0.0538462	0.915385	0.0107692	0.431373	0.313725	0.196078	0.0392157	0.0196078
44	0.94	0.06	0.121767	0.396552	0.0538793	0.258621	0.0840517	0.0431034	0.0150862	0.0269397	0.378049	0.195122	0.268293	0.0121951	0.146341	0.289593	0.280543	0.21267	0.18552	0.0316742
45	0.943182	0.0568182	0.161069	0.468129	0.027416	0.18026	0.0589445	0.0486635	0.013708	0.0418095	0.661765	0.139706	0.0514706	0.0147059	0.132353	0.224299	0.573832	0.134579	0.0560748	0.011215
48	0.959459	0.0405405	0.335648	0.236111	0.0393519	0.0856481	0.111111	0.152778	0.0393519	0	0.129412	0.0705882	0.0235294	0.752941	0.0235294	0.176991	0.371681	0.230088	0.212389	0.00884956
49	0.92437	0.0756303	0.148936	0.370213	0.0255319	0.195745	0.165957	0.0510638	0.0425532	0	0.0658683	0.88024	0.0179641	0.0299401	0.00598802	0.516194	0.326586	0.0863698	0.0195682	0.0512821
50			0.126263	0.535354	0.0328283	0.159091	0.0631313	0.0378788	0.0252525	0.020202	0.0430622	0.0287081	0.0191388	0	0.909091
51	0.954286	0.0457143	0.204155	0.319783	0.063234	0.122855	0.126468	0.123758	0.0352304	0.00451671	0.0996785	0.0514469	0.0514469	0.720257	0.0771704	0.327869	0.430328	0.163934	0.0532787	0.0245902
52			0.1875	0.35625	0.10625	0.16875	0.09375	0.04375	0.04375	0	0.0144928	0.057971	0.0289855	0.753623	0.144928
53			0.175082	0.329836	0.0367213	0.2	0.0865574	0.109508	0.0196721	0.042623	0.16129	0	0.580645	0.0645161	0.193548
46											0.125	0.5	0.25	0.125	0
47	0.92869	0.0713101									0.204301	0.0967742	0.0107527	0.537634	0.150538	0.402174	0.326087	0.173913	0.0434783	0.0543478
54	0.98519	0.01481									0.0298507	0.925373	0	0.0447761	0	0.380435	0.282609	0.26087	0.076087	0

## Sheet: 6-2
Table 6-2.The proportion of each cell subcluster in CRC patients.
CRC
	stage	CS1	CS2	CS3	CS5	CS6	CS4	CD4-S2	CD4-S1	CD4-S6	CD8-S7	CD8-S4	NK-S8	CD8-S3	CD4-S9	CD4-S5	CD8-S10	M-S3	M-S1	Mon-S2	DC-S4	M-S5	M-S7	M-S6	FS1	FS3	FS2	FS5	FS6	FS4
31	IIB	0.3125	0.334325	0.183532	0.0714286	0.0248016	0.0734127	0.354533	0.110961	0.155616	0.0351827	0.0838972	0.0987821	0.100135	0.0473613	0.0108254	0.00270636	0.381232	0.328446	0.228739	0.0322581	0.00146628	0.0117302	0.016129	0.508032	0.146586	0.279116	0.0542169	0.00803213	0.00401606
32	IIIB	0.399209	0.264822	0.181818	0.0316206	0.0158103	0.106719	0.153692	0.317014	0.00882825	0.0726324	0.160514	0.0317014	0.076244	0.0846709	0.081862	0.0128411	0.0664962	0.237852	0.0920716	0.212276	0.309463	0.0460358	0.0358056	0.094518	0.455577	0.230624	0	0.0226843	0.196597
33	IVA	0.372549	0.42959	0.0909091	0.0445633	0.0178253	0.0445633	0.201878	0.15493	0.0657277	0.0469484	0.0469484	0.0234742	0.0328638	0.028169	0.384977	0.0140845	0.389503	0.290055	0.165746	0.118785	0.00276243	0.0303867	0.00276243	0.575472	0.00524109	0.0932914	0.257862	0.0408805	0.0272537
35	I							0.0984252	0.0761155	0.0892388	0.0524934	0.0170604	0.0262467	0.254593	0.0249344	0.290026	0.0708661	0.111111	0.318519	0.185185	0.125926	0.207407	0.0296296	0.0222222	0.132022	0.188202	0.452247	0.00280899	0.00842697	0.216292
36	IIA							0.454545	0.0909091	0	0	0	0.363636	0.0909091	0	0	0	0.105263	0.385965	0.192982	0.245614	0.0350877	0.0175439	0.0175439	0.0676692	0.225564	0.390977	0.037594	0.0075188	0.270677
37	IIIB							0.3	0.2	0.2	0	0	0.2	0.1	0	0	0	0.0909091	0.0909091	0.272727	0.272727	0	0.0909091	0.181818	0.104167	0.229167	0.333333	0.208333	0.0208333	0.104167
38	IIA							0.4	0	0.2	0	0	0.2	0.2	0	0	0	0.177215	0.291139	0.21519	0.240506	0.0506329	0.0253165	0	0.0977778	0.111111	0.191111	0	0.0222222	0.577778
KUL01	IIB	0.315096	0.341439	0.173252	0.0688956	0.0253293	0.0759878	0.325581	0.124031	0.155039	0.0418605	0.0945736	0.111628	0.0976744	0.0387597	0.00775194	0.00310078	0.396579	0.335925	0.237947	0.0139969	0.00155521	0	0.0139969	0.489496	0.151261	0.289916	0.0567227	0.00840336	0.00420168
KUL19	IIIB	0.461165	0.276699	0.140777	0.0339806	0.0194175	0.0679612	0.149435	0.335795	0.00608167	0.0764553	0.169852	0.0291051	0.0642919	0.0838401	0.0755864	0.00955691	0.0670927	0.226837	0.108626	0.236422	0.316294	0.00319489	0.0415335	0.0924855	0.456647	0.231214	0	0.0231214	0.196532
KUL21	IVA	0.380074	0.439114	0.0848708	0.0405904	0.0147601	0.0405904	0.202073	0.170984	0.0777202	0.0466321	0.0310881	0.0207254	0.0414508	0.0207254	0.38342	0.00518135	0.414925	0.307463	0.176119	0.0925373	0.00298507	0.00298507	0.00298507	0.578158	0.00428266	0.0952891	0.256959	0.0417559	0.0235546
KUL28	IIA							0.625	0.125	0	0	0	0.25	0	0	0	0	0.106383	0.468085	0.170213	0.191489	0.0425532	0	0.0212766	0.0692308	0.230769	0.384615	0.0384615	0.00769231	0.269231
KUL30	IIA							0.444444	0	0.111111	0	0	0.222222	0.222222	0	0	0	0.186667	0.306667	0.213333	0.24	0.0533333	0	0	0.102679	0.107143	0.1875	0	0.0223214	0.580357
KUL31	I	0.422727	0.272727	0.163636	0.0363636	0.0590909	0.0454545	0.0798479	0.13308	0.193916	0.0304183	0.117871	0.0114068	0.193916	0.0228137	0.209125	0.00760456	0.128571	0.257143	0.157143	0.185714	0.271429	0	0	0.236111	0.0555556	0.152778	0	0	0.555556
SMC01	IIA	0.319948	0.279793	0.165803	0.0531088	0.0388601	0.142487	0.201502	0.0788486	0.121402	0.0262829	0.0813517	0.0650814	0.210263	0.0475594	0.110138	0.057572	0.03125	0.320312	0.265625	0.0859375	0.0703125	0.015625	0.210938	0.510417	0.0208333	0.197917	0	0	0.270833
SMC02	IIIB	0.41954	0.304598	0.126437	0.0574713	0.0229885	0.0689655	0.236908	0.122195	0.0673317	0.0299252	0.0349127	0.0473815	0.216958	0.0174564	0.19202	0.0349127	0.0892388	0.238845	0.511811	0.0472441	0.00524934	0.0262467	0.0813648	0.615385	0.0307692	0.123077	0	0.0153846	0.215385
SMC03	IIIC	0.379679	0.386809	0.0926916	0.0606061	0.0106952	0.0695187	0.136054	0.183673	0.00340136	0.047619	0.0748299	0.207483	0.0306122	0.0102041	0.0952381	0.210884	0.282511	0.457399	0.179372	0.0179372	0.0269058	0.0269058	0.00896861	0.371257	0.0239521	0.0299401	0.57485	0	0
SMC04	IIIB	0.317073	0.422764	0.170732	0.0243902	0	0.0650407	0.324257	0.329208	0.0420792	0.0618812	0.121287	0.0519802	0.049505	0.0123762	0.00742574	0	0.17637	0.203767	0.525685	0.0376712	0.00684932	0.00684932	0.0428082	0.396226	0.0754717	0.339623	0	0.0943396	0.0943396
SMC05	IIA							0.125532	0.229787	0.0212766	0.106383	0.202128	0.0531915	0.221277	0.0382979	0.00212766	0	0.0555556	0.333333	0.444444	0.0555556	0.0555556	0	0.0555556	0.230769	0.307692	0.384615	0	0	0.0769231
SMC06	IIIB	0.46729	0.205607	0.11215	0.0560748	0.0280374	0.130841	0.0047619	0.0130952	0.00119048	0.00119048	0.0047619	0.00833333	0.00119048	0.0047619	0.513095	0.447619	0.284884	0.348837	0.331395	0.00581395	0.0232558	0	0.00581395	0.8	0	0.169231	0.0307692	0	0
SMC07	I	0.310541	0.25641	0.19943	0.042735	0.0712251	0.119658	0.23298	0.273828	0.086233	0.0847201	0.0741301	0.0816944	0.0983359	0.0574887	0.00605144	0.00453858	0.0282686	0.45583	0.162544	0.180212	0.0459364	0	0.127208	0.0851064	0	0.457447	0	0	0.457447
SMC08	IIIB	0.466258	0.257669	0.153374	0.0429448	0.0184049	0.0613497	0.0719823	0.142857	0.0719823	0.0919158	0.173865	0.0376523	0.047619	0.0310078	0.192691	0.138427	0.113043	0.386957	0.33913	0.0173913	0.108696	0.00434783	0.0304348	0.633333	0.283333	0.0583333	0.00833333	0	0.0166667
SMC09	IIA	0.370299	0.275796	0.133076	0.0636451	0.0308582	0.126326	0.193627	0.0490196	0.0416667	0.0196078	0.0490196	0.0294118	0.578431	0.0392157	0	0	0.145695	0.413907	0.298013	0.0596026	0.0198675	0.00331126	0.0596026	0.409091	0.136364	0.409091	0	0	0.0454545
SMC10	IIA	0.329268	0.345528	0.146341	0.0813008	0.0365854	0.0609756	0.441011	0.0983146	0.0646067	0.0758427	0.179775	0.0308989	0.0926966	0.011236	0.00280899	0.00280899	0.19697	0.69697	0.0662879	0.0208333	0.00378788	0	0.0151515	0.609524	0.0761905	0.209524	0	0.00952381	0.0952381
SMC11	IIIA	0.377193	0.355263	0.114035	0.0570175	0.0482456	0.0482456	0.104135	0.139357	0.286371	0.0214395	0.0459418	0.211332	0.0765697	0.114855	0	0	0.102941	0.470588	0.161765	0.132353	0.0441176	0	0.0882353	0.214286	0	0.357143	0	0	0.428571
SMC14	IIIB							0.182301	0.19823	0.0300885	0.19292	0.20708	0.127434	0.0247788	0.00884956	0.0212389	0.00707965	0.0929204	0.303097	0.457965	0.0951327	0	0.00442478	0.0464602	0.579235	0.0327869	0.229508	0.0163934	0.114754	0.0273224
SMC15	IIA							0.14497	0.177515	0.10355	0.035503	0.0591716	0.0384615	0.0606509	0.0414201	0.264793	0.0739645	0.1	0.291667	0.366667	0.0916667	0.0583333	0.025	0.0666667	0.359551	0.0617978	0.426966	0	0.0168539	0.134831
SMC16	IIIB	0.334474	0.313088	0.115483	0.0667237	0.0479042	0.122327	0.22619	0.22619	0.22619	0.0952381	0.0119048	0.0357143	0.166667	0	0.0119048	0	0.103448	0.482759	0.275862	0.0344828	0	0	0.103448	0.0588235	0	0.117647	0	0.0588235	0.764706
SMC17	IIIB	0.287162	0.439189	0.125	0.0574324	0.0405405	0.0506757	0.241935	0.284946	0.0268817	0.129032	0.0376344	0.0752688	0.166667	0.0322581	0	0.00537634	0.22619	0.277778	0.373016	0.0714286	0.00396825	0.00793651	0.0396825	0.436508	0.015873	0.5	0	0.031746	0.015873
SMC18	IIA	0.38343	0.277457	0.120424	0.0568401	0.0549133	0.106936	0.201923	0.288462	0.278846	0.0480769	0.0192308	0.0769231	0.0673077	0.0192308	0	0	0.181818	0.509091	0.163636	0.127273	0	0.0181818	0	0	0.5	0.5	0	0	0
SMC19	IIIB	0.5	0.275362	0.0797101	0.0434783	0.0797101	0.0217391	0.0752	0.632	0.0576	0.0848	0.096	0.0144	0.032	0.0016	0.0048	0.0016	0	0.24	0.12	0.52	0	0	0.12	0.137931	0	0.206897	0	0	0.655172
SMC20	IIIB	0.408824	0.332353	0.0941176	0.0882353	0.0294118	0.0470588	0.282511	0.340807	0.0134529	0.165919	0.0403587	0.0986547	0.044843	0.0044843	0.0044843	0.0044843	0.0598592	0.454225	0.190141	0.204225	0	0.00352113	0.0880282	0.554217	0.289157	0.120482	0	0.0210843	0.0150602
SMC21	IVA	0.4271	0.302694	0.0832013	0.0594295	0.0316957	0.0958796	0.142212	0.13544	0.367946	0.0383747	0.0316027	0.0609481	0.196388	0.00451467	0.0225734	0	0	0.652174	0.152174	0.0869565	0.0652174	0	0.0434783	0	0	0	0	0	1
SMC22	IIIB	0.254202	0.305322	0.172269	0.105742	0.0413165	0.121148	0.159259	0.159259	0.325926	0.0259259	0.0444444	0.0259259	0.181481	0.00740741	0.0481481	0.0222222	0.0566038	0.490566	0.320755	0.0566038	0.0377358	0.0377358	0	0.166667	0	0.333333	0	0	0.5
SMC23	IIIB	0.5	0.262626	0.0909091	0.0555556	0.020202	0.0707071	0.171053	0.468045	0.0676692	0.0601504	0.103383	0.0714286	0.0319549	0.0244361	0.0018797	0	0.0414747	0.488479	0.21659	0.138249	0.0414747	0.00921659	0.0645161	0.176471	0	0.352941	0	0	0.470588
SMC24	I	0.416309	0.274678	0.103004	0.0515021	0.0944206	0.0600858	0.220713	0.168081	0.00679117	0.0967742	0.110357	0.129032	0.193548	0.0526316	0.00848896	0.0135823	0.128378	0.239865	0.489865	0.0506757	0.027027	0.0236486	0.0405405	0.666667	0.030303	0.212121	0	0	0.0909091
SMC25	IVA							0.140878	0.318707	0.30485	0.0600462	0.0461894	0.0577367	0.0554273	0.0161663	0	0	0.0175439	0.175439	0.368421	0.315789	0.0701754	0	0.0526316	0.166667	0	0.333333	0	0	0.5

## Sheet: 6-3
Table 6-3.The proportion of each cell subcluster in LC patients.
LC
	stage	CS1	CS2	CS3	CD8-S3	CD8-S5	CD4-S2	CD4-S6	CD8-S1	CD4-S4	NK-S7	CD4-S8	M-S1	DC-S4	M-S2	Mon-S6	M-S7	M-S3	M-S5	FS1	FS2	FS3	FS4
1	IIA				0.115727	0.0949555	0.175074	0.0801187	0.397626	0.0890208	0.0207715	0.0267062	0.745342	0.204969	0.0372671	0.0124224	0	0	0
2	IB				0.111111	0.0980392	0.124183	0.117647	0.333333	0.176471	0.0392157	0	0.508642	0.0962963	0.0518519	0.0222222	0.318519	0.00246914	0	0.495652	0.408696	0.0608696	0.0347826
3	IIIB	0.858333	0.116667	0.025	0.145223	0.110828	0.0687898	0.0496815	0.380892	0.206369	0.0267516	0.011465	0.0325733	0.0938111	0.852117	0.0136808	0	0.00716612	0.000651466	0.405685	0.139535	0.307494	0.147287
4	IIB	0.743066	0.189781	0.0671533	0.148925	0.130914	0.120968	0.0376344	0.414785	0.097043	0.0231183	0.0266129	0.064803	0.0292249	0.86277	0.025413	0	0.0177891	0
5	IA3	0.817382	0.148515	0.0341034	0.18804	0.0598007	0.231894	0.0717608	0.271096	0.104983	0.0445183	0.027907	0.0952381	0.10101	0.733045	0.0649351	0	0.004329	0.001443	0.417197	0.242038	0.159236	0.181529
6	IIIA	0.819048	0.157143	0.0238095	0.171662	0.0217984	0.207084	0.0313351	0.382834	0.117166	0.0367847	0.0313351	0.281553	0.121359	0.524272	0.0194175	0	0.0533981	0
7	IB				0.112859	0.0424695	0.246559	0.0487613	0.180889	0.238301	0.0963429	0.0338183	0.696332	0.0879713	0.0202616	0.0271865	0	0.167992	0.000256476	0.421053	0.284211	0.0947368	0.2
8	IIB				0.167927	0.0717095	0.249319	0.0677761	0.215431	0.140696	0.0577912	0.0293495	0	0	0.00630915	0	0	0	0.993691

## Sheet: 6-4
Table 6-4.The proportion of each cell subcluster in LC patients.
OV
	stage	CS1	CS5	CS4	CS2	CS6	CS3	NK-S3	CD4-S5	CD4-S4	CD4-S1	CD8-S2	M-S1	Mon-S2	M-S4	M-S5	M-S3	FS3	FS1	FS4	FS5	FS2
11	IIIC	0.751864	0.0745474	0.057508	0.0330138	0.0798722	0.00319489	0.166387	0.0420168	0.122689	0.29916	0.369748	0.335899	0.315008	0.0852117	0.0571743	0.206707	0.190887	0.254318	0.126861	0.0479452	0.379988
12	IVB	0.881591	0.0416281	0.00462535	0.0296022	0.0425532	0	0.180328	0.106557	0.0491803	0.377049	0.286885	0.567901	0.214366	0.0493827	0.0415264	0.126824	0.275748	0.454042	0.0786268	0.0199336	0.17165
13	IVB	0.821839	0.0689655	0.0804598	0.0268199	0	0.00191571	0.223188	0.0942029	0.0637681	0.372464	0.246377	0.563492	0.210317	0.0753968	0.0436508	0.107143	0.17418	0.434426	0.125	0.192623	0.0737705
14	IVB	0.397567	0.0263071	0.0680697	0.328182	0.00197304	0.177902	0.12381	0.00952381	0.0571429	0.504762	0.304762	0.464602	0.287611	0.0530973	0.0840708	0.110619	0.232227	0.350711	0.0805687	0.172986	0.163507
15	IA	0.927273	0	0.0545455	0.0181818	0	0	0.146104	0.0357143	0.0746753	0.49026	0.253247	0.59761	0.191235	0.0159363	0.0717131	0.123506

## Sheet: 6-5
Table 6-5.The proportion of each cell subcluster in LC patients.
PDAC
	stage	CS2	CS1	CS3	CS4	CD4-S4	CD8-S1	CD4-S2	CD4-S5	CD4-S3	NK-S7	NK-S6	M-S1	M-S2	Mon-S3	M-S4	FS2	FS5	FS1	FS4	FS3	FS6
T1	III	0.430288	0.473558	0.0745192	0.0216346								0.683333	0.3	0.00833333	0.00833333
T2	IIB	0.331126	0.384106	0.10596	0.178808	0.107829	0.159527	0.202363	0.1226	0.308715	0.0221566	0.0768095	0.941909	0.0497925	0.00829876	0	0.5	0.0441176	0.205882	0.205882	0.0441176	0
T3	IB	0.347222	0.475	0.116667	0.0611111	0.207317	0.365854	0.134146	0.0365854	0.121951	0.097561	0.0365854	0.614213	0.375635	0	0.0101523	0.568493	0.0410959	0.178082	0.164384	0.0410959	0.00684932
T4	IIB	0.28125	0.442708	0.145833	0.130208	0.2	0.257895	0.157895	0.0473684	0.231579	0.0578947	0.0473684	0.583333	0.40625	0.0104167	0	0.376623	0.0519481	0.350649	0.194805	0.025974	0
T5	IB					0.137255	0.45098	0.254902	0	0.0980392	0.0392157	0.0196078	0.837321	0.148325	0.00956938	0.00478469	0.642857	0.0178571	0.178571	0.125	0.0357143	0
T6	IIA	0.374532	0.483146	0.104869	0.0374532								0.846457	0.141732	0	0.011811	0.407407	0.0555556	0.314815	0.166667	0.0555556	0
T7	IIB	0.31405	0.504132	0.140496	0.0413223								0.852941	0.0588235	0	0.0882353
T8	III	0.390361	0.438554	0.163855	0.00722892								0.345238	0.654762	0	0
T9	IIA	0.422556	0.496992	0.0714286	0.00902256								0.173913	0.818841	0	0.00724638	0.234277	0.0298742	0.394654	0.165094	0.139937	0.0361635
T10	IB					0.150376	0.406015	0.157895	0.0451128	0.105263	0.037594	0.0977444	0.759259	0.111111	0.0925926	0.037037
T11	IIB	0.382353	0.490196	0.0686275	0.0588235	0.193878	0.326531	0.173469	0.0408163	0.112245	0.112245	0.0408163	0.402542	0.491525	0.0550847	0.0508475	0.0591681	0.108377	0.311072	0.154071	0.301113	0.066198
T12	III					0.17847	0.17847	0.314448	0.0339943	0.17847	0.0708215	0.0453258	0.221053	0.553684	0.185263	0.04	0.361111	0.0555556	0.305556	0.194444	0.0833333	0
T13	IIB	0.349558	0.526549	0.0840708	0.039823								0.962687	0.011194	0.0223881	0.00373134	0.283505	0.14433	0.231959	0.159794	0.149485	0.0309278
T14	IIB	0.387315	0.468596	0.0935961	0.0504926								0.686275	0.313725	0	0	0.301587	0.111111	0.174603	0.238095	0.15873	0.015873
T15	IIB	0.457944	0.457944	0.0654206	0.0186916	0.137931	0.267241	0.405172	0.0517241	0.0689655	0.0689655	0	0.79	0.1	0	0.11	0.21118	0.0807453	0.349896	0.204969	0.10766	0.0455487
T16	IIB	0.425926	0.416667	0.12037	0.037037								0.687117	0.104294	0.00920245	0.199387	0.212121	0.142424	0.330303	0.142424	0.112121	0.0606061
T17	IB	0.39823	0.4941	0.0803835	0.0272861								0.356	0.628	0	0.016	0.194245	0.143885	0.446043	0.122302	0.0791367	0.0143885
T18	IB	0.33509	0.508957	0.10432	0.0516333								0.321429	0.428571	0.0357143	0.214286	0.432927	0.115854	0.207317	0.140244	0.0792683	0.0243902
T19	IB	0.346667	0.517333	0.117333	0.0186667	0.217391	0.347826	0.191304	0.0521739	0.0434783	0.0782609	0.0695652	0.656958	0.270227	0.0275081	0.0453074	0.336066	0.147541	0.196721	0.180328	0.122951	0.0163934
T20	IIB	0.344	0.44	0.156	0.06								0.458333	0.5	0.0416667	0
T21	IB	0.361809	0.522613	0.080402	0.0351759	0.153846	0.25	0.461538	0.0192308	0	0.0961538	0.0192308	0.177632	0.6875	0.134868	0
T22	IB	0.386139	0.559406	0.0465347	0.00792079	0.173507	0.257463	0.279851	0.0317164	0.197761	0.0186567	0.0410448	0.286885	0.655738	0.057377	0
T23	IIB	0.352459	0.540984	0.0942623	0.0122951	0.241379	0.252874	0.180077	0.0689655	0.137931	0.0842912	0.0344828	0.652866	0.299363	0.0254777	0.022293	0.215929	0.0646018	0.479646	0.123894	0.0911504	0.0247788
T24	IB	0.409302	0.506977	0.0651163	0.0186047	0.175676	0.432432	0.27027	0	0.0405405	0.0810811	0	0.890244	0.0853659	0.0243902	0	0.438095	0.0539683	0.206349	0.15873	0.12381	0.0190476

## Sheet: 6-6
Table 6-6.The proportion of each cell subcluster in LC patients.
SCC
	CS2	CS5	CS1	CS4	CS6	CS3	CD8-S2	CD4-S1	CD8-S6	CD4-S7	CD8-S3	CD4-S4	UN-S8	NK-S5	DC-S5	M-S1	DC-S2	M-S4	DC-S6	M-S3	M-S7	FS
P2	0.30567	0.05341	0.504519	0.0821693	0.0172555	0.0369762	0.22	0.47	0.06	0.04	0.06	0.09	0.02	0.04	0.0447504	0.472461	0.233219	0.121343	0.0619621	0.0516351	0.0146299	1
P3							0.412088	0.159341	0	0	0.115385	0.208791	0.010989	0.0934066	0.097561	0.414634	0.146341	0	0.097561	0.243902	0	1
P4	0.357187	0.0717684	0.297622	0.0645295	0.0597725	0.149121	0.388889	0.361111	0.138889	0.0555556	0	0.0277778	0	0.0277778	0.101979	0.467728	0.158778	0.0856282	0.0111876	0.111446	0.063253	1
P5	0.359813	0.0280374	0.457944	0.0560748	0.0420561	0.0560748	0.138973	0.283988	0	0.00302115	0.0966767	0.308157	0.0060423	0.163142	0.0375469	0.409262	0.0362954	0.361702	0.0187735	0.136421	0	1
P6	0.179837	0.0535876	0.651226	0.0572207	0.0199818	0.0381471	0.0307692	0.615385	0.0307692	0.0615385	0.0461538	0.138462	0.0615385	0.0153846	0.0367171	0.463283	0.12419	0.152268	0.0637149	0.137149	0.0226782	1
P8	0.319689	0.0663373	0.384615	0.112915	0.0169372	0.099506	0.219424	0.158273	0	0.00359712	0.521583	0.0395683	0	0.057554	0.0117532	0.147894	0.0675808	0.049951	0.00587659	0.714006	0.0029383	1
P9	0.291971	0.040146	0.485401	0.10219	0.0182482	0.0620438	0.128378	0.506757	0.0135135	0.0135135	0.0337838	0.27027	0.0135135	0.0202703	0.0606586	0.498267	0.0381282	0.181109	0.10052	0.117851	0.0034662	1
P10	0.381589	0.0653029	0.391031	0.0841857	0.0173092	0.0605822	0.136364	0.545455	0.136364	0	0.0454545	0.0454545	0.0909091	0	0.0897098	0.361478	0.218997	0.129288	0.0131926	0.150396	0.0369393	1
P7	0.286127	0.0674374	0.454721	0.11368	0.0144509	0.0635838	0	0.555556	0.111111	0.0666667	0.0222222	0	0.0666667	0.177778	0.0139147	0.405844	0.37384	0.0862709	0.0292208	0.0718924	0.0190167	1
P1	0.324877	0.0270049	0.456628	0.0646481	0.0335516	0.0932897									0	0	1	0	0	0	0	1
