# Supplementary material for: Characterizing Intercellular Communication of Pan-Cancer Reveals SPP1+ Tumor-Associated Macrophage Expanded in Hypoxia and Promoting Cancer Malignancy Through Single-Cell RNA-Seq Data
Source: Front Cell Dev Biol. 2021 Oct 5;9:749210. doi: 10.3389/fcell.2021.749210 (PMC8523849; doi:10.3389/fcell.2021.749210)
Supplement: Supplementary file 8 [file Table_8.XLSX]

## Sheet: Table 8-1
Table 8-1. The DEGs in T cells(T), myeloid cells(M), tumor cells(C) and fibroblasts(F) in BC.
T	P_value	Flod change		M	P_value	Flod change		C	P_value	Flod change		F	P_value	Flod change
CXCL13	5.72e-105	1.39011		SPP1	8.48647e-62	2.51306		IGF2	2.8909e-123	3.11059		GAPDH	7.47e-208	1.07219
TPI1	0	0.975313		TIMP1	1.91253e-28	2.05519		FABP5	1.24122e-159	2.52997		MIF	6.78e-208	0.974222
GAPDH	0	0.940058		MIF	3.92095e-115	1.38106		VIM	2.95665e-132	2.47189		ENO1	8.01e-239	0.95443
GZMB	1.8e-93	0.904616		C15orf48	9.93884e-55	1.35249		MUCL1	7.45613e-11	2.1569		LDHA	7.87e-223	0.945676
PGAM1	0	0.874355		GAPDH	1.6189e-150	1.30798		NDRG1	1.19403e-168	2.11058		TPI1	1.38e-243	0.882399
ENO1	0	0.854144		LDHA	2.02675e-109	1.30723		BGN	7.66997e-118	2.04936		ALDOA	6.75e-252	0.881511
TNFRSF18	3.56e-151	0.800633		PLIN2	2.99437e-29	1.27245		CTHRC1	1.30459e-118	2.01945		TAGLN	2.27e-64	0.853902
LDHA	0	0.790728		MT1G	8.99119e-11	1.2661		CRABP1	4.03844e-140	1.95196		ACTA2	2.19e-32	0.837639
TNFRSF4	6.59e-87	0.77237		TPI1	9.51868e-132	1.2336		S100A1	6.55691e-129	1.85812		TIMP1	1.92e-30	0.727845
STMN1	3.71e-62	0.70767		S100A10	4.03907e-101	1.22396		CHI3L1	8.82647e-102	1.82845		ACTB	1.55e-122	0.705768
MIF	0	0.696729		ALDOA	6.21361e-146	1.20033		PTGDS	4.00932e-85	1.81174		PGAM1	2.2e-222	0.702045
PKM	2.89e-187	0.654323		ENO1	5.01849e-120	1.1668		GAPDH	2.89967e-202	1.75628		CXCL9	4.02e-11	0.681564
ALDOA	0	0.623709		MT2A	1.88344e-18	1.14005		RPS20	1.08035e-115	1.73124		HLA-B	2.24e-48	0.65746
TUBA1B	1.34e-65	0.602749		S100A8	1.5806e-33	1.11487		GSTP1	4.78129e-204	1.69579		MYL9	2.43e-70	0.651536
HBB	4.79e-08	-1.19814		MT1X	2.25641e-13	1.0429		S100A10	1.1654e-181	1.58781		RGS5	9.08e-08	0.649936
				FABP5	1.66763e-30	1.0203		SDC2	1.59275e-118	1.56417		IFITM1	9.2e-48	0.598603
				CSTB	1.05306e-27	0.965929		ACAN	1.82177e-91	1.50476		MT2A	1.37e-23	0.596584
				PKM	1.27403e-92	0.930754		APOD	4.45366e-13	1.42816		NDUFA4L2	7.21e-14	0.58823
				CCL2	7.72364e-10	0.925703		LGALS1	1.26293e-145	1.42104		NEAT1	8.36e-34	-0.580226
				S100A6	2.34268e-77	0.918751		MIF	1.18712e-276	1.36373		APOD	1.41e-10	-0.594086
				G0S2	5.40054e-13	0.918665		ENO1	1.40308e-250	1.33984
				CCL7	2.05863e-15	0.886512		S100A8	6.46664e-19	1.27975
				FBP1	2.31691e-28	0.882491		LY6E	2.6604e-134	1.22274
				VCAN	4.96447e-20	0.882393		SNAI2	4.38082e-95	1.20162
				SLC11A1	5.93842e-47	0.851001		MT1X	6.96631e-63	1.18228
				PGAM1	2.70469e-80	0.789762		S100A6	3.68014e-66	1.17774
				VIM	5.08488e-51	0.777309		PLA2G2A	1.72751e-34	1.17722
				S100A9	1.04786e-31	0.77695		CALML5	3.07128e-44	1.16801
				LGALS1	2.60575e-50	0.772585		NDUFA4L2	6.82378e-87	1.16105
				SH3BGRL3	4.10922e-75	0.768733		LDHA	1.36481e-205	1.14408
				CXCL8	1.55015e-13	0.749353		TPI1	2.23883e-257	1.12047
				FN1	4.75961e-15	0.735478		SERPINE2	9.31224e-101	1.10028
				IL1RN	1.68683e-20	0.733818		KRT17	1.22784e-21	1.10011
				PGK1	4.37117e-51	0.729642		MT2A	2.93256e-30	1.07284
				CLEC5A	1.08978e-44	0.724784		CRYAB	1.13798e-76	1.07154
				PLAUR	7.10837e-30	0.714448		ALDOA	3.61175e-216	1.07057
				ANXA2	2.46391e-40	0.688865		TSPO	2.11726e-136	1.06909
				ISG15	2.04533e-12	0.669083		COL2A1	1.42511e-78	1.06225
				BCL2A1	1.80893e-30	0.667592		PPIB	3.48128e-95	1.05361
				ACTB	1.15141e-33	0.665872		MFGE8	3.67533e-94	1.04721
				ATF5	4.63496e-25	0.660443		CCND1	4.15285e-64	1.04173
				IL4I1	4.09914e-24	0.651277		GRINA	1.64928e-99	1.03564
				ANPEP	3.61033e-36	0.640474		MGP	4.57084e-142	1.03257
				MARCO	3.78518e-29	0.637994		IFI27	1.15478e-37	1.03112
				ADM	1.31708e-36	0.629703		ITM2C	1.23045e-97	1.0309
				HMOX1	2.69647e-05	0.625141		COTL1	5.22749e-119	1.01479
				SLC2A3	2.05536e-20	0.617924		ASPH	1.12067e-62	1.00076
				CXCL10	0.00785479	0.611649		RHOBTB3	3.38018e-89	0.990098
				APOBEC3A	4.46834e-11	0.608413		CD24	6.08801e-91	0.986388
				MMP9	0.00610624	0.605178		CHI3L2	9.96486e-52	0.980888
				FTH1	1.61997e-14	0.597886		GNAS	9.67751e-93	0.97712
				SOD2	2.41552e-16	0.59437		RPL30	5.39491e-78	0.975633
				IFI30	2.03477e-23	0.58751		PCBP1	8.03255e-135	0.969402
				IFI6	3.8681e-16	0.581296		YBX1	2.74095e-139	0.951001
				ITM2B	4.9209e-32	-0.588124		S100A9	1.27196e-24	0.945141
				MT-ND3	3.14334e-45	-0.592232		UBE2V2	3.02264e-99	0.944287
				CD74	1.02409e-27	-0.594363		TAGLN2	3.15831e-147	0.940511
				C1QC	3.1248e-27	-0.601172		CEBPD	1.33126e-41	0.918076
				HLA-DQA1	8.35693e-27	-0.60257		PKM	5.20774e-133	0.914585
				HLA-DPA1	5.80434e-32	-0.659478		CRISPLD1	2.1708e-65	0.910642
				HLA-DPB1	2.48815e-31	-0.659566		SLURP1	3.83171e-64	0.882328
				C1QB	8.32792e-34	-0.721162		LDHB	2.43513e-100	0.880439
				C1QA	2.56601e-34	-0.778771		RPL7	3.87592e-51	0.868495
				A2M	3.51771e-53	-0.782601		RPL8	3.70182e-51	0.868011
				FOLR2	3.75433e-32	-0.825831		CHCHD7	3.57191e-71	0.864317
				SLC40A1	4.53732e-48	-0.973523		TSPAN3	4.50998e-73	0.864234
				SEPP1	2.31169e-59	-1.80779		LY6K	2.05906e-90	0.855101
								GCSH	1.22944e-103	0.850199
								ENY2	2.62594e-110	0.848202
								PIP	3.07045e-06	0.846583
								ACTG2	1.93405e-29	0.84222
								SH3BGRL3	2.13622e-88	0.823907
								NPW	4.30137e-99	0.823697
								LGALS3	9.69934e-82	0.813135
								PTMS	9.7545e-104	0.802138
								PRELP	6.73971e-54	0.800084
								ANXA2	3.16805e-90	0.797249
								CALR	7.50805e-71	0.792771
								GEM	6.35765e-53	0.782958
								MTDH	3.37242e-66	0.779315
								PPP1R16A	3.93517e-57	0.776673
								TPM2	3.5005e-106	0.775312
								HMGA1	1.71771e-86	0.774238
								EIF3E	1.47224e-74	0.767832
								TCEA1	1.42588e-38	0.765679
								PGK1	5.9344e-80	0.761389
								S100A11	2.32998e-78	0.750107
								C8orf22	5.01914e-32	0.730151
								KRT14	1.92921e-10	0.729905
								SOD3	1.75779e-51	0.714532
								TKT	1.5204e-84	0.713167
								TMED9	2.46143e-72	0.712309
								CYC1	4.86372e-90	0.708699
								TCEB1	1.83666e-81	0.705373
								S100A4	6.32102e-72	0.705283
								LARP6	8.78981e-93	0.704869
								DNAJB1	3.89265e-24	0.703573
								TMSB10	2.17092e-44	0.697672
								C2orf40	2.64544e-27	0.695061
								DBI	9.99373e-70	0.692552
								MT1E	6.11173e-38	0.683067
								IFI6	1.01863e-26	0.681597
								ARF1	1.14854e-88	0.677644
								SEC61G	7.28212e-93	0.676527
								PPP1R1B	1.46195e-91	0.67447
								MRPL21	1.02137e-82	0.672215
								NUPR1	1.59788e-46	0.668865
								MARCKSL1	2.54463e-52	0.666408
								RPL4	1.39055e-33	0.661554
								SCRG1	1.70937e-85	0.660532
								SNU13	2.04628e-105	0.653492
								SCD	4.63848e-51	0.648993
								MRPL15	4.474e-77	0.645706
								ACTB	5.61485e-42	0.64561
								SQLE	8.89754e-53	0.636456
								TIMP3	6.02509e-36	0.633877
								CTTN	5.93024e-58	0.633762
								CSTB	4.04931e-25	0.631513
								HSF1	1.88918e-78	0.629725
								SLC25A5	3.78021e-39	0.62929
								TUBA1B	5.48125e-34	0.628139
								P4HA1	2.22905e-89	0.626309
								MFAP2	2.50038e-45	0.622475
								PFN1	6.40715e-56	0.615612
								ANGPTL4	6.10405e-28	0.613127
								PDIA6	8.36619e-62	0.611092
								PRDX1	1.26796e-75	0.609232
								PUF60	1.48554e-76	0.60758
								ISG15	3.52279e-30	0.605685
								TAGLN	7.25628e-07	0.603973
								PRDX4	2.69039e-80	0.603733
								KDELR2	9.05502e-75	0.601649
								PRKDC	1.94377e-41	0.600342
								TMEM45A	3.54541e-92	0.596968
								S100A13	1.99922e-60	0.596475
								BNIP3	1.48978e-42	0.591191
								NENF	5.48781e-87	0.590881
								RPS2	1.69186e-81	0.587087
								ASS1	4.56784e-69	0.586784
								PABPC1	7.35409e-53	0.584014
								KRT7	1.72548e-23	0.58393
								FSCN1	1.78318e-97	0.583385
								EIF4EBP1	1.6012e-60	0.582983
								CKS1B	5.60868e-65	0.582417
								VSTM2A	8.33078e-63	-0.582928
								RHOB	9.66717e-61	-0.585465
								SPAG16	2.02327e-67	-0.590418
								FASN	8.67527e-70	-0.59553
								IER2	7.74896e-67	-0.605798
								AHNAK	1.9808e-112	-0.608847
								MUC1	2.29487e-100	-0.611171
								EGR1	4.72153e-50	-0.619804
								RPS26	3.52765e-57	-0.621402
								NAT1	1.12543e-119	-0.630555
								SPDEF	7.5061e-121	-0.645228
								TBC1D9	2.27366e-121	-0.646704
								AR	6.9246e-123	-0.65171
								MT-ND1	8.75941e-130	-0.656582
								PBX1	3.22145e-117	-0.660117
								MT-CO3	8.98795e-120	-0.660422
								MLPH	1.79508e-133	-0.663486
								LRP2	2.5917e-113	-0.676381
								KCNC2	2.08118e-112	-0.678275
								ZG16B	2.85123e-124	-0.68208
								CIRBP	5.07418e-156	-0.684534
								PLAT	2.81563e-103	-0.687294
								SMIM22	1.45769e-121	-0.689388
								FSIP1	1.36767e-128	-0.690846
								CTA-392E5.1	8.53389e-110	-0.695323
								SLC7A2	1.59881e-101	-0.695393
								JUN	1.78944e-62	-0.700859
								SCUBE2	3.82691e-69	-0.702469
								AFF3	5.59973e-132	-0.707475
								MT-ATP6	1.26757e-121	-0.713579
								MALAT1	1.96894e-98	-0.713898
								FOSB	1.04862e-84	-0.714496
								MED13L	5.42362e-104	-0.716531
								PTP4A2	2.58364e-105	-0.72035
								ASCL1	3.26406e-61	-0.723393
								MT-CYB	1.59747e-130	-0.729492
								GRIA2	1.14422e-135	-0.732594
								TPRG1	2.50451e-139	-0.736378
								KAT6B	2.42414e-124	-0.741267
								PSD3	1.7975e-112	-0.742664
								DUSP4	7.36999e-112	-0.746272
								MT-ATP8	2.33847e-131	-0.755419
								BTG2	5.26009e-88	-0.760287
								MRPS30	2.20342e-115	-0.761841
								PHGR1	1.18339e-87	-0.783879
								PRKACB	3.84729e-94	-0.796422
								MAST4	3.94142e-132	-0.796535
								NFKBIZ	2.86116e-125	-0.823492
								ABHD2	1.99964e-111	-0.842158
								ANKRD50	2.41776e-119	-0.860676
								PCM1	4.69467e-152	-0.861284
								LDLRAD4	8.02313e-132	-0.882052
								RP11-53O19.1	1.71322e-126	-0.889155
								MT-ND3	4.83351e-175	-0.908091
								SESN3	5.65862e-102	-0.92972
								PKIB	9.95802e-138	-0.956593
								MTRNR2L12	6.27353e-83	-0.994938
								EVL	4.3155e-158	-1.01293
								ESR1	2.37935e-157	-1.0164
								SLC39A6	4.20321e-105	-1.03309
								GATA3	1.04068e-156	-1.05309
								COX6C	1.00205e-65	-1.08987
								ASAH1	1.27173e-145	-1.1218
								CXCL14	3.21171e-108	-1.18575
								ANKRD30A	6.33784e-182	-1.19413
								RP11-53O19.2	3.66127e-92	-1.20571
								CPB1	2.4363e-158	-1.25284
								TFF3	9.32298e-140	-1.41479

## Sheet: 8-2
Table 8-2. The DEGs in T cells(T), myeloid cells(M), tumor cells(C) and fibroblasts(F) in CRC.
T	P_value	Flod change		M	P_value	Flod change		C	P_value	Flod change		F	P_value	Flod change
GZMB	9.33276e-61	1.00571		SPP1	4.2942e-140	1.97574		FABP1	6.97428e-88	1.61263		MMP1	2.66743e-61	1.9288
TPI1	0	1.0001		LDHA	0	1.18271		LDHA	0	1.21473		MMP3	4.64274e-50	1.71714
ENO1	0	0.987671		CSTB	1.06387e-154	0.969706		ALDOA	0	1.15846		CXCL8	8.88473e-53	1.59314
GAPDH	1.27593e-290	0.836214		C15orf48	8.92662e-164	0.963561		CKB	6.03674e-67	1.15115		CXCL1	3.73586e-42	1.52088
GNLY	1.56081e-20	0.796606		ENO1	0	0.946822		ENO1	0	1.05022		ENO1	0	1.14866
PKM	2.11212e-204	0.795791		TPI1	0	0.944182		PKM	0	0.832681		CHI3L1	4.90027e-44	1.00056
GZMA	2.67574e-54	0.794544		GAPDH	0	0.94094		CSTB	3.67587e-209	0.828367		TGFBI	8.26257e-141	0.985611
LDHA	0	0.788408		MMP1	1.39397e-17	0.938444		TPI1	0	0.815358		LDHA	0	0.970523
PGAM1	0	0.784481		TIMP1	4.91081e-113	0.914834		PGK1	6.25288e-264	0.773757		GAPDH	0	0.955017
CCL4L2	8.42377e-10	0.748106		CXCL5	3.901e-23	0.913577		PGAM1	0	0.747003		PKM	6.0817e-300	0.896827
MIF	5.25743e-308	0.719294		ALDOA	0	0.887156		GAPDH	0	0.731326		TPI1	0	0.890394
TNFRSF18	3.46948e-84	0.689411		S100A10	5.70496e-244	0.865313		KRT19	2.49103e-112	0.728999		POSTN	5.02321e-74	0.882293
ALDOA	0	0.660624		MIF	1.883e-304	0.845764		FXYD3	8.59823e-114	0.712523		IL24	4.76352e-42	0.877285
STMN1	7.90506e-61	0.65098		IL1RN	1.75638e-85	0.826777		SCD	7.73821e-110	0.701916		ALDOA	0	0.871848
TUBA1B	8.08954e-59	0.650898		MT2A	6.24494e-31	0.806061		MIF	0	0.698836		IL6	1.16131e-35	0.846078
ACTB	1.07143e-154	0.626339		MMP12	1.05946e-08	0.748367		NDRG1	3.39357e-139	0.639512		MT2A	1.48117e-35	0.828407
CCL20	1.81697e-17	0.625454		CCL20	4.46037e-25	0.737237		S100P	6.57359e-114	0.625453		CXCL6	4.26915e-37	0.819688
CCL3	1.35141e-20	0.608678		MT1G	1.60372e-16	0.717675		ANXA2	1.86973e-142	0.61997		SLC16A3	5.86529e-214	0.815611
TXNIP	1.48763e-46	-0.686418		G0S2	3.80652e-47	0.70708		PIGR	3.67963e-59	0.605453		CXCL5	6.22551e-63	0.812535
				PLIN2	4.16017e-77	0.69737		S100A14	8.94583e-99	0.591339		FTH1	4.63943e-79	0.78312
				INHBA	2.2894e-62	0.69256		SPINK4	7.0586e-11	-0.858843		FN1	2.89728e-63	0.782584
				MARCO	5.58467e-68	0.685281		PLCG2	1.3317e-45	-1.4162		LOXL2	5.35152e-140	0.749031
				PKM	6.22175e-207	0.680466						PGAM1	1.453e-321	0.748316
				CCL2	7.51934e-19	0.666581						TIMP1	1.82727e-79	0.737529
				FBP1	1.10627e-70	0.66019						MIF	1.46874e-240	0.734496
				VIM	4.45044e-188	0.657519						G0S2	7.26047e-24	0.728737
				MT1X	1.01532e-24	0.626699						PLAU	1.18095e-67	0.716062
				LGALS1	1.10854e-174	0.624645						CTSB	8.13769e-146	0.711966
				PGK1	8.42678e-150	0.61751						ADM	1.48019e-101	0.708789
				IL1B	1.03527e-33	0.613827						IL11	1.12859e-50	0.707086
				FTH1	1.27e-112	0.613769						TNFRSF12A	2.96537e-119	0.706973
				PGAM1	3.57376e-232	0.605286						DDIT4	6.60438e-51	0.692668
				ADM	1.47716e-119	0.587771						TNFAIP6	4.59916e-80	0.681976
				CXCL8	2.3388e-28	0.582614						IER3	2.76588e-37	0.68011
				FABP5	9.17534e-42	0.58031						SERPINH1	2.7984e-147	0.66871
				HERPUD1	3.61895e-80	-0.590044						COL10A1	5.24443e-57	0.665348
				SLC40A1	1.18284e-69	-0.659046						PGK1	3.55976e-149	0.660295
				IGKC	4.40951e-28	-0.699995						SOD2	1.70841e-38	0.656848
				JCHAIN	1.48565e-68	-0.989925						CXCL3	2.80387e-27	0.654104
				IGLC2	0.000173685	-1.07246						MMP11	4.41165e-09	0.647325
				SEPP1	3.3299e-89	-1.1287						TUBA1B	9.89384e-86	0.645253
				GZMB	3.86673e-65	-1.47945						PDPN	1.2471e-91	0.645089
												COMP	1.36134e-16	0.628246
												INHBA	7.31699e-77	0.610872
												TIMP3	1.12775e-27	0.608237
												TNC	1.07526e-53	0.59865
												SPON2	4.58631e-66	0.595545
												MGP	2.23206e-63	-0.608928
												RGS5	5.38915e-22	-0.645633
												SPARCL1	3.86191e-78	-0.693893
												IGKC	7.91053e-08	-0.803655
												ADIRF	6.06338e-51	-0.890109

## Sheet: 8-3
Table 8-3. The DEGs in T cells(T), myeloid cells(M), tumor cells(C) and fibroblasts(F) in LC.
T	P_value	Flod change		M	P_value	Flod change		C	P_value	Flod change		F	P_value	Flod change
SPINK1	3.83074e-50	1.2057		SPP1	0	2.70843		SPP1	2.61405e-43	1.85981		ENO1	5.32644e-66	1.22288
ENO1	0	1.073		MMP12	1.87435e-61	1.63023		CCL20	3.22679e-15	1.7456		EEF1A1	1.88894e-21	1.2001
TPI1	0	1.04386		C15orf48	4.73129e-300	1.2941		FGB	2.27928e-25	1.48715		MMP1	0.000159463	1.07128
GAPDH	0	1.03191		MMP9	5.43692e-120	1.25388		FGG	1.02914e-24	1.41197		LDHA	1.16446e-60	1.05244
LDHA	0	1.0267		LDHA	0	1.21949		KRT17	7.27272e-18	1.3787		DDIT4	3.0688e-15	1.04513
MT2A	3.34101e-163	1.02264		MIF	0	1.16707		ERO1A	4.55295e-55	1.36049		ADM	1.46417e-26	1.02265
GZMB	8.62064e-95	0.99375		TIMP1	2.19662e-99	1.14667		C15orf48	6.42198e-41	1.34286		SERPINE2	0.00403507	1.02206
STMN1	1.30055e-139	0.9162		GAPDH	0	1.11541		FGA	4.15682e-25	1.34035		MT2A	6.64707e-07	0.94941
TUBA1B	1.27076e-131	0.903201		G0S2	4.62466e-85	1.07386		TACSTD2	7.28078e-52	1.3305		CCL2	0.00162933	0.935215
PKM	1.67249e-307	0.888885		IL1RN	1.28678e-119	1.05676		ANGPTL4	4.0449e-39	1.28674		MIF	1.3891e-44	0.923402
TUBB	9.58104e-153	0.871126		TPI1	0	0.994311		KRT19	2.29959e-33	1.27822		MT1X	2.70198e-05	0.892537
CCL20	3.82654e-67	0.850359		ENO1	0	0.950119		IGFBP3	6.88222e-47	1.21697		ANGPTL4	6.04893e-13	0.876254
TNFRSF4	1.07138e-74	0.810288		MT1G	3.78399e-40	0.948359		S100P	9.42854e-58	1.20703		TPI1	1.24523e-52	0.87571
MIF	0	0.785037		ALDOA	0	0.895179		ERRFI1	4.65624e-54	1.17505		RPL17	3.35157e-13	0.867433
TNFRSF18	4.12922e-122	0.746867		MT2A	1.37493e-58	0.891724		ALDOA	2.68842e-177	1.14443		SERPINE1	2.22134e-14	0.82782
LCN2	4.91156e-31	0.723847		CXCL8	5.10007e-36	0.862037		S100A16	1.7366e-52	1.13746		GAPDH	8.49789e-39	0.821498
ALDOA	0	0.720906		FBP1	2.22482e-143	0.856793		CSTB	2.05686e-39	1.13579		RPL41	1.32387e-06	0.79846
IFITM3	1.7562e-79	0.662306		PLAUR	4.09906e-180	0.785532		LCN2	1.53089e-30	1.11748		ALDOA	4.18888e-44	0.787919
GNLY	1.33507e-26	0.660127		CCL2	8.62085e-36	0.781919		MUC1	1.71063e-39	1.11186		FTH1	6.75099e-12	0.762865
PGAM1	6.44786e-263	0.659009		PKM	1.75558e-291	0.756014		S100A11	1.80998e-64	1.10384		PGK1	6.05908e-21	0.755834
CALCA	3.27703e-42	0.655361		ADM	2.7196e-206	0.745699		PAEP	3.37359e-45	1.08561		TIMP1	0.000292676	0.7504
RANBP1	1.81445e-211	0.648315		SLC2A3	1.30642e-151	0.728272		F3	1.31096e-38	1.07685		AREG	0.0294287	0.708044
MT1X	2.37452e-52	0.620959		CSTB	1.36208e-92	0.712221		SLPI	2.26422e-25	1.07205		MT1E	1.07752e-06	0.701268
KIAA0101	2.71817e-143	0.619409		CCL3	6.7073e-33	0.699192		KRT7	7.7759e-45	1.06708		NBEAL1	1.66696e-10	0.672951
PAEP	3.24478e-48	0.607359		MT1X	1.79438e-48	0.658265		VEGFA	1.05619e-58	1.06704		PRSS23	8.75098e-11	0.662309
ACTB	3.50196e-201	0.606057		CCL4	5.45283e-13	0.622362		LDHA	1.44394e-88	1.0559		HNRNPA1	2.64083e-15	0.655651
PFN1	5.07439e-184	0.596994		DDIT4	1.41458e-83	0.617498		SLC2A1	1.07556e-83	1.04529		TUBA1B	3.32014e-16	0.644847
CXCR4	2.48499e-190	-0.617194		PLIN2	6.73513e-64	0.598068		SFN	2.88402e-39	1.03256		TUBB6	4.43957e-36	0.642595
JUNB	3.53953e-112	-0.619766		PGK1	1.884e-188	0.592657		TESC	1.05823e-22	1.01236		TGFBI	2.06112e-13	0.640157
FOS	1.97453e-108	-0.682204		ALOX5AP	2.70018e-53	0.588723		PDZK1IP1	2.3565e-40	1.01069		HILPDA	2.71017e-11	0.634563
HBA1	5.96107e-09	-0.73954		MS4A6A	2.66842e-138	-0.588246		AKR1C2	7.0596e-17	0.993209		TNFRSF12A	1.82185e-18	0.632131
TXNIP	5.76073e-207	-0.753866		C1QA	1.10475e-90	-0.595303		S100A10	1.78763e-61	0.972811		NNMT	2.51705e-13	0.628683
IL7R	7.77156e-125	-0.788644		PLTP	2.26175e-66	-0.61145		SLC16A3	8.075e-63	0.968896		PGAM1	1.05538e-30	0.614743
				SLC40A1	1.54564e-103	-0.640284		NDRG1	2.53485e-55	0.962391		EIF5A	3.8651e-17	0.598239
				MS4A7	4.20131e-202	-0.649713		RNASET2	1.99484e-26	0.935838		IL6	0.000158478	0.597837
				C1QB	6.09496e-109	-0.670759		TFF1	9.33443e-23	0.931118		PTX3	5.71139e-05	0.595153
				FABP4	5.57693e-49	-0.798225		AREG	1.69813e-24	0.91969		RPS2	6.19248e-25	0.5874
				CFD	3.94482e-187	-0.811621		CTSL	1.37946e-31	0.915321		CPE	9.32236e-10	0.586475
				PDK4	3.27463e-199	-0.842116		ASPH	1.15477e-38	0.909555		RPL39	1.18014e-06	0.580228
				SEPP1	9.13964e-126	-1.11467		TIMP1	3.70433e-36	0.89365		MT-ND3	3.55082e-26	-0.618046
				CCL18	6.35846e-158	-1.65146		CCND1	3.01382e-12	0.877717		RGS5	2.45817e-05	-0.66786
								TMEM141	1.19372e-32	0.871403		GPX3	9.43346e-12	-0.676526
								AKR1B10	1.87009e-12	0.861236		MGP	6.0033e-17	-0.689568
								S100A14	1.50312e-38	0.852447		C10orf10	4.19061e-09	-0.834204
								DDIT4	5.27329e-21	0.844236		IGHG1	0.724838	-0.834895
								CD151	4.42383e-33	0.816494		IGKC	0.000164956	-0.979943
								PTGR1	9.16415e-22	0.802587
								CTSB	2.00614e-32	0.797203
								SFTA2	6.34093e-41	0.791747
								GPRC5A	1.27314e-39	0.782705
								CDA	1.05952e-44	0.770758
								TALDO1	2.16354e-24	0.769026
								TFPI	2.44685e-25	0.76205
								SPINT1	8.17756e-29	0.760056
								SAT1	8.34877e-14	0.759204
								WSB1	3.33785e-15	0.758163
								GPX4	3.2039e-39	0.756845
								NNMT	3.55765e-21	0.755475
								TNNC2	3.26905e-14	0.752735
								FAM83A	1.45547e-41	0.748004
								CA12	6.48436e-25	0.746158
								CD55	6.12017e-24	0.745305
								MIF	8.63147e-45	0.741822
								QSOX1	4.23765e-36	0.737599
								COMT	4.39009e-37	0.731991
								AGR2	6.48055e-18	0.72881
								PLP2	8.20654e-27	0.728645
								SRGN	6.71729e-20	0.726586
								ADM	8.61861e-33	0.721082
								ENO1	1.62841e-47	0.717706
								CD99	4.11499e-24	0.703529
								SERPINA1	6.64976e-17	0.702205
								RHOB	2.99672e-28	0.701627
								LGALS3	5.60976e-38	0.699601
								BLVRB	3.16237e-46	0.699398
								ANXA2	2.12293e-35	0.698278
								TNFRSF12A	1.05454e-26	0.68682
								PKM	2.40365e-46	0.685864
								AQP3	3.99263e-30	0.682279
								C19orf33	1.08033e-20	0.679282
								CTSD	3.88685e-33	0.67262
								PHPT1	3.15827e-36	0.669891
								KRT6A	1.93881e-12	0.667173
								LAMB3	2.34437e-21	0.665474
								CLDN7	2.18501e-25	0.648815
								C4orf48	7.43658e-34	0.64786
								HSPB1	2.51135e-31	0.644873
								KRT8	1.92255e-18	0.641287
								KLK5	4.41185e-29	0.63919
								CST3	1.52084e-31	0.63861
								CRIP1	3.72521e-15	0.637062
								P4HA1	1.69598e-54	0.633965
								MYDGF	8.85306e-36	0.627775
								C4orf3	9.95781e-38	0.627197
								MSLN	2.57401e-23	0.619982
								SPINT2	5.2708e-35	0.609965
								RP11-841O20.2	6.85551e-17	0.605105
								LGALS1	2.00787e-08	0.600036
								SMIM22	1.60198e-29	0.596609
								SFTPB	9.47477e-07	0.596491
								SYNGR2	1.71858e-35	0.596406
								SRD5A3	1.66555e-19	0.591787
								FKBP2	1.35673e-27	0.590157
								PTTG1IP	5.99463e-23	0.588152
								CPE	5.12206e-18	0.586282
								SEMA3B	2.82412e-29	0.585996
								CD63	6.77297e-28	0.580048
								RBP1	7.8185e-25	-0.581764
								EHF	1.93407e-24	-0.590386
								RPS25	0.00126809	-0.590856
								RPL26	5.87981e-16	-0.603646
								RPS6	2.08843e-34	-0.617049
								STAT1	1.95269e-27	-0.622146
								SOX4	3.25518e-19	-0.635159
								IFI16	4.35093e-25	-0.635604
								IFI6	1.50423e-25	-0.636299
								TUBB2B	1.27393e-32	-0.642388
								YBX1	6.89885e-41	-0.652759
								CD74	1.71881e-22	-0.66099
								IFI27	9.80016e-26	-0.670504
								DNAJA1	5.63879e-37	-0.674906
								CXCR4	1.0846e-32	-0.687142
								JUN	1.49815e-23	-0.687769
								BTG1	7.06931e-38	-0.72793
								GBP1	1.59194e-32	-0.728179
								STMN1	1.90068e-26	-0.741305
								HLA-DRA	3.20686e-25	-0.749295
								CDKN2A	4.51589e-32	-0.777193
								IGKC	0.0104175	-0.852529
								HLA-B	2.24817e-43	-0.938524
								TUBA1A	1.15296e-35	-1.03451
								FABP7	8.85415e-24	-1.05056
								EEF1A1	5.93073e-12	-1.10201

## Sheet: 8-4
Table 8-4. The DEGs in T cells(T), myeloid cells(M), tumor cells(C) and fibroblasts(F) in OV.
T	P_value	Flod change		M	P_value	Flod change		C	P_value	Flod change		F	P_value	Flod change
PGAM1	4.80023e-65	0.75844		SPP1	1.49757e-100	2.32103		NDUFA4L2	2.07919e-186	1.35966		ENO1	6.65767e-287	0.893149
ENO1	1.28076e-71	0.753734		C15orf48	1.19711e-97	1.22626		LDHA	0	1.06376		TGFBI	3.31693e-78	0.877231
LDHA	2.34208e-60	0.725324		LDHA	6.11606e-291	1.21548		ALDOA	0	0.942803		SLPI	6.033e-26	0.873988
SPP1	4.03993e-22	0.712812		MIF	1.8851e-224	1.16183		GAPDH	0	0.942343		LDHA	1.26837e-282	0.872801
MIF	4.43747e-59	0.676345		TIMP1	1.50617e-62	1.04499		AKAP12	2.17023e-58	0.886979		TIMP1	4.77035e-60	0.833992
TPI1	6.53266e-52	0.606234		GAPDH	2.60357e-251	0.978161		ENO1	1.61203e-225	0.835804		HP	8.94934e-13	0.777069
IL32	2.11085e-28	0.601346		ENO1	9.59064e-240	0.969936		BNIP3	9.08059e-135	0.831792		TPI1	4.9808e-268	0.736397
CD74	4.70718e-05	-0.61894		ALDOA	3.36766e-273	0.956089		TPI1	3.5321e-307	0.783157		KRT19	4.78835e-38	0.718299
JCHAIN	6.87793e-06	-0.70458		CSTB	6.66942e-77	0.92848		PGK1	8.44797e-166	0.767922		GAPDH	1.39886e-159	0.701797
HBB	0.000623498	-0.719158		FN1	4.6848e-40	0.84101		MT1X	5.79491e-19	0.675577		MIF	4.0277e-177	0.667856
IGKC	1.36916e-05	-0.760221		TPI1	7.15853e-235	0.840949		IGF2	5.42542e-35	0.67363		KRT18	6.69004e-43	0.644272
				MT2A	3.51832e-21	0.829171		MIF	5.32729e-210	0.669722		ANXA2	3.17194e-103	0.595801
				S100A10	4.76067e-131	0.826163		S100A9	1.94619e-07	0.646012		STAR	4.77826e-41	-0.651477
				PLIN2	5.46413e-35	0.800352		CAPS	1.16754e-26	-0.636175
				MT1G	4.40567e-28	0.777934		TPPP3	3.55047e-20	-0.637149
				CCL20	2.1575e-28	0.7715
				S100A8	3.39181e-47	0.754068
				S100A9	6.98023e-44	0.733367
				VIM	3.75864e-110	0.722744
				PKM	1.77287e-123	0.715216
				LGALS1	8.50963e-74	0.706144
				NUPR1	5.56607e-20	0.703561
				PGK1	4.65193e-106	0.701908
				MT1X	7.05569e-20	0.655635
				FABP5	4.55737e-39	0.641601
				G0S2	1.30209e-28	0.621515
				RNASE1	4.22925e-33	0.613161
				SOD2	1.5444e-40	0.590013
				CTSL	6.42821e-21	0.582826
				SEPP1	7.92413e-24	-0.689986

## Sheet: 8-5
Table 8-5. The DEGs in T cells(T), myeloid cells(M), tumor cells(C) and fibroblasts(F) in PDAC.
T	P_value	Flod change		M	P_value	Flod change		C	P_value	Flod change		F	P_value	Flod change
GNLY	3.74e-11	1.48706		SPP1	1.17012e-181	2.15174		S100A9	1.43266e-191	1.63955		ENO1	0	1.22623
TNFRSF4	1.7e-35	1.44645		CCL2	3.36134e-69	1.60562		FABP1	4.71947e-100	1.57772		MIF	0	1.0042
GZMB	1.29e-28	1.39312		IL8	4.15013e-120	1.54645		LDHA	0	1.38951		GAPDH	0	0.974557
GAPDH	2.43e-124	1.23551		TIMP1	3.5456e-98	1.21597		ENO1	0	1.35566		ADM	5.00881e-179	0.935528
CXCL13	2.72e-10	1.20833		MIF	4.90883e-293	1.16653		MT1X	2.57167e-136	1.32344		LDHA	0	0.919787
TNFRSF18	1.99e-59	1.18471		CSTB	2.56476e-133	1.11699		GAPDH	0	1.18968		ALDOA	0	0.914067
CCL4	1.84e-09	1.17675		C15orf48	5.60628e-171	1.10317		MIF	0	1.12657		TPI1	0	0.893419
ENO1	3.82e-134	1.14873		CTSL	2.12827e-103	1.09964		CRABP2	3.26165e-198	1.12176		PGK1	7.38068e-200	0.855105
LGALS1	1.13e-64	1.11178		CXCL3	4.27574e-72	1.09575		TPI1	0	1.03408		TGFBI	6.43576e-144	0.761313
PGAM1	4.14e-105	1.09805		LDHA	0	1.08778		ALDOA	0	1.02588		DDIT4	4.6219e-44	0.748606
PKM	1.64e-90	1.07174		ADM	2.98751e-223	1.03616		ADM	0	1.02451		FTH1	1.21255e-134	0.698774
TPI1	4.14e-149	1.071		MARCO	1.72554e-111	1.01799		SERPINA1	5.60513e-110	1.01569		MT2A	3.299e-39	0.630303
LDHA	3.39e-120	1.03665		CCL3	1.29045e-82	1.0073		ERO1L	0	0.953592		HILPDA	7.94383e-49	0.607161
S100A4	2e-54	0.963409		G0S2	1.97862e-48	0.929168		PGK1	0	0.944061		GJB2	1.05414e-72	0.605598
GZMA	4.61e-18	0.957474		ALDOA	0	0.903017		LGALS1	3.97699e-203	0.943778		RPS4Y1	2.18489e-101	0.603141
IL2RA	1.86e-32	0.916423		GAPDH	2.5768e-301	0.874458		EGLN3	0	0.885552		PGAM1	2.66645e-209	0.601956
ACTB	1.52e-72	0.836025		RNASE1	2.30953e-38	0.870039		NDRG1	1.44357e-294	0.840249		SOD3	7.81147e-57	-0.587105
CKLF	5.67e-45	0.830644		PLAUR	2.51365e-126	0.864883		NDUFA4L2	1.21891e-168	0.83924		MT-ND1	2.27783e-159	-0.590094
TUBA1B	3.99e-32	0.805798		CXCL2	1.66284e-62	0.854208		FTH1	3.33098e-278	0.807031		MT-CYB	3.13424e-192	-0.622272
DUSP4	1.7e-40	0.798794		TPI1	1.16128e-304	0.84367		S100A8	3.93671e-61	0.767489		SFRP4	6.89113e-53	-0.62277
MIF	2.23e-97	0.791249		CCL7	2.06835e-53	0.842601		S100A2	2.2226e-50	0.750508		GSN	8.69785e-76	-0.634977
CD7	3.08e-37	0.785792		IL1RN	4.15216e-94	0.827076		IGFBP2	4.72746e-156	0.740719		SPARCL1	5.63438e-106	-0.635516
RGS1	7.54e-20	0.771689		ENO1	1.02732e-284	0.824088		SLC2A1	0	0.734493		CTRB2	1.5098e-68	-0.638738
ID2	2.9e-29	0.76903		FTH1	1.00253e-118	0.820471		ANGPTL4	1.63333e-181	0.676232		C3	1.91395e-63	-0.69194
IL32	2.26e-37	0.755181		MT1X	4.81582e-27	0.81635		CLDN3	8.46815e-135	0.674179		A2M	5.09169e-83	-0.700477
BATF	3.19e-28	0.707475		CCL20	1.9503e-38	0.783125		CSTB	2.88866e-138	0.649424		MT-ND3	5.82158e-205	-0.704613
RANBP1	9.54e-43	0.704453		NUPR1	3.2327e-32	0.779946		SLC16A3	3.48681e-288	0.647073		MGP	6.3513e-164	-0.967681
TUBB	2.21e-33	0.704338		S100A10	1.1172e-186	0.773996		PKM	6.16463e-219	0.64636		C7	2.59016e-112	-1.10521
STMN1	6.63e-14	0.697781		PLIN2	1.41654e-59	0.765832		PHGR1	5.91531e-65	0.637463		APOD	1.66138e-106	-1.21746
PGK1	7.35e-40	0.694569		FBP1	6.68329e-81	0.737927		C4orf3	4.9224e-260	0.635356
ALDOA	4.5e-84	0.675163		BCL2A1	3.17845e-116	0.730194		RPS4Y1	5.68311e-123	0.615168
LAG3	4.32e-30	0.666556		PGK1	1.84667e-143	0.665277		RPL10	2.8521e-285	0.596094
PFN1	1.02e-54	0.663741		SLC2A3	3.28998e-81	0.642464		KRT7	4.69909e-102	0.585976
MYL6	1.3e-65	0.657379		ALOX5AP	2.12578e-71	0.635372		RNASET2	1.07141e-144	0.583626
SH3BGRL3	1.02e-45	0.654361		RETN	6.51863e-25	0.633212		LGALS4	5.48016e-98	-0.58067
NKG7	2.25e-12	0.650843		IFI6	2.824e-40	0.630703		TM4SF4	1.08412e-115	-0.584934
MT2A	1.71e-25	0.646242		MT1G	1.02047e-09	0.626628		MT1M	4.51738e-146	-0.600312
H2AFZ	2.07e-20	0.634586		SOD2	5.1939e-63	0.615405		SUPT5H	6.83e-200	-0.605011
SRGN	4.29e-31	0.62226		FTL	2.17127e-78	0.609912		CTSE	8.88876e-204	-0.653446
FABP5	7.52e-16	0.605313		CTSD	1.00154e-65	0.604983		COX6B1	6.36042e-198	-0.678489
CRIP1	1.9e-25	0.604436		LGALS1	3.87039e-120	0.604126		MT1G	2.75545e-68	-0.6785
CTSC	2.07e-30	0.603064		PKM	2.33265e-148	0.594542		TXNIP	8.31381e-227	-0.687667
CTLA4	3.14e-26	0.599834		MT2A	9.16853e-26	0.594128		TFF1	7.50254e-180	-0.690827
PSME2	2.78e-36	0.596644		ISG15	3.19857e-28	0.590895		RPS16	9.03315e-111	-0.705891
RBPJ	4.07e-23	0.591234		PGAM1	1.4069e-184	0.587115		PLAT	1.09282e-129	-0.711397
AC092580.4	1.43e-15	0.59075		CTSB	4.85023e-68	0.585264		RP11-1143G9.4	4.28539e-32	-0.724699
CALR	1.08e-31	0.584802		HLA-DQA1	1.17623e-74	-0.595024		FXYD5	2.35585e-187	-0.735057
RPL21	1.19e-81	-0.585408		FCER1A	5.19411e-38	-0.600232		LSR	4.93986e-221	-0.755447
RPL3	1.5e-87	-0.59386		CD74	1.69264e-140	-0.661475		LYZ	4.69925e-249	-0.96019
RPS4Y1	3.82e-19	-0.604306		HLA-DPB1	2.68492e-107	-0.696186		DPCR1	2.91837e-225	-0.988021
RPS27	1.11e-130	-0.644288						FXYD3	1.30245e-208	-1.03641
RPL34	4.29e-96	-0.647467						REG4	1.11327e-82	-1.05084
IL7R	3.12e-27	-0.678537						ZFP36	2.42411e-166	-1.17223
								NTS	5.44111e-92	-1.3025

## Sheet: 8-6
Table 8-6. The DEGs in T cells(T), myeloid cells(M), tumor cells(C) and fibroblasts(F) in SCC.
T	P_value	Flod change		M	P_value	Flod change		C	P_value	Flod change
KIAA0101	7.17826e-15	1.09932		SPP1	3.08268e-146	2.94846		ISG15	4.97695e-151	1.5499
STMN1	7.50329e-11	1.07318		CCL20	2.18174e-82	1.87039		NDUFA4L2	1.07941e-181	1.47596
ENO1	9.82204e-42	1.06116		IL8	1.58496e-60	1.66272		IGFBP3	9.89146e-134	1.44094
TPI1	1.22232e-45	1.04009		G0S2	1.03993e-74	1.59145		CXCL10	1.31088e-17	1.26435
KRT14	0.000208393	1.03556		PLIN2	9.95568e-130	1.51377		NDRG1	2.72329e-251	1.22605
PCNA	3.58757e-14	0.992938		NUPR1	1.35419e-44	1.27977		PI3	8.26386e-51	1.15716
HIST1H4C	1.6805e-06	0.96737		CCL3	3.99567e-35	1.21487		SLC2A1	0	1.04574
TUBA1B	2.03312e-11	0.960855		CXCL3	2.99055e-29	1.20463		GJB2	1.55647e-303	1.00266
TYMS	2.53273e-13	0.939441		ADM	2.7709e-148	1.14335		S100A2	2.391747e-318	0.98942
TK1	4.14241e-16	0.927283		CCL4	2.13381e-29	1.07111		KRT16	3.69422e-229	0.985498
DUT	7.33038e-18	0.927255		HSPB1	3.50826e-71	1.06523		CDKN2A	6.22382e-129	0.971747
RRM2	5.1942e-13	0.902148		MIF	0	1.05504		KRT6A	0	0.95744
LDHA	1.15286e-34	0.886236		INHBA	4.38786e-54	1.04719		TUBA1B	7.08976e-206	0.925189
TUBB	2.16979e-13	0.880964		KRT14	1.34365e-22	1.04577		HIST1H1C	4.793e-128	0.898242
H2AFZ	3.19229e-12	0.843131		LDHA	3.46834e-319	1.04399		MMP1	5.46353e-37	0.897818
S100A2	0.000314495	0.829791		S100A2	1.66596e-17	1.02438		PTTG1	9.11597e-139	0.892753
GAPDH	2.1193e-23	0.782671		GAPDH	0	1.0119		KRT6C	3.8333e-93	0.890336
PGAM1	3.53994e-30	0.77608		CSTB	2.10094e-112	1.00439		IGFBP6	1.42787e-117	0.878723
RANBP1	1.86893e-17	0.744852		IL1RN	4.16985e-61	0.974218		ADM	1.18977e-234	0.876828
IL2RA	0.000155133	0.719406		SOD2	1.54002e-46	0.937944		ENO1	0	0.863627
FABP5	5.43363e-08	0.704807		C15orf48	8.50457e-97	0.902123		LDHA	0	0.857195
KRT16	9.67357e-07	0.68349		CXCL2	2.80927e-17	0.900132		MIF	6.60028e-305	0.830758
ALDOA	1.00937e-29	0.679564		GPNMB	8.96244e-53	0.88548		CXCL11	7.18164e-21	0.828913
ZWINT	1.02146e-11	0.669664		IL1B	7.61337e-25	0.856276		ACTB	0	0.826262
PTTG1	4.48752e-10	0.654743		ALDOA	4.67463e-281	0.855118		ANXA1	3.89882e-193	0.822044
MIF	4.74788e-21	0.649328		HSPA6	3.76123e-43	0.819572		ANXA3	4.36769e-218	0.820387
SIVA1	7.35965e-12	0.64149		KRT6A	2.49333e-10	0.813455		SPRR1B	1.724e-60	0.809239
MCM7	2.95041e-10	0.630292		DNAJB1	4.69272e-56	0.79276		TPI1	0	0.795559
DNAJC9	7.81973e-11	0.617124		SFN	4.6547e-21	0.785296		IFIT3	2.74789e-38	0.777695
PKM	2.13078e-12	0.616705		SLC2A1	9.24751e-125	0.777271		ISG20	1.39472e-70	0.767823
HMGB2	1.23427e-07	0.596754		HSPA1B	3.87215e-46	0.772848		TUBB6	0	0.762772
RAN	2.94257e-13	0.59011		TPI1	3.03868e-254	0.754497		DDIT4	1.54717e-28	0.747624
FEN1	3.87202e-12	0.586985		SLC2A3	4.83871e-57	0.751826		ALDOA	0	0.732319
HIST1H1E	1.99827e-05	0.582617		ERO1L	1.94091e-129	0.730776		FGFBP1	1.0962e-183	0.728212
DUSP1	4.18495e-07	-0.676677		NDRG1	4.32273e-138	0.726516		FAM213A	2.06927e-171	0.726421
GZMH	0.00016041	-0.68524		HILPDA	2.2617e-73	0.725404		TPM4	1.32315e-232	0.725223
CXCR4	4.15195e-05	-0.704525		IER3	2.71864e-35	0.725347		ITGA6	8.61547e-138	0.719657
LTB	0.000676767	-0.899927		HSP90AA1	1.31388e-65	0.721145		GBP1	9.26364e-52	0.718109
				HK2	4.0716e-105	0.701766		TXN	0	0.703793
				KRT16	2.45676e-05	0.699757		CCNB1	1.59634e-85	0.703472
				MT2A	1.07359e-09	0.697813		PKM	0	0.693733
				KRT5	5.72819e-13	0.693939		CAV1	6.70205e-66	0.689519
				ENO1	1.62632e-200	0.69318		S100A8	7.77385e-138	0.688424
				PLAUR	3.66815e-48	0.689192		WARS	2.48105e-55	0.684984
				HSPH1	3.36012e-65	0.680821		PHLDA2	1.32172e-148	0.684606
				CEBPB	7.05834e-40	0.666568		PGAM1	0	0.681808
				RNASE1	4.47867e-16	0.661236		SERPINB5	1.2274e-140	0.674122
				CXCL14	4.17116e-21	0.659035		ADIRF	4.6195e-85	0.673967
				TIMP1	3.6575e-17	0.651495		PRELID1	0	0.673369
				DDIT4	1.99567e-43	0.643601		IGFL1	4.29561e-60	0.671189
				CA2	5.54402e-53	0.637624		TNFRSF12A	3.88171e-143	0.664237
				BNIP3L	1.58801e-93	0.624203		LGALS1	1.61059e-16	0.658332
				MMP9	9.1469e-20	0.614783		S100A10	5e-324	0.656005
				HSPA1A	8.23181e-27	0.603524		GAPDH	0	0.653073
				PTGS2	1.21027e-17	0.600407		SFN	0	0.650567
				PGK1	2.22463e-115	0.592057		PGK1	5.53528e-264	0.64931
				VEGFA	8.74873e-77	0.588338		ODC1	2.39906e-73	0.645048
				LGALS1	1.40849e-58	0.58535		S100A9	4.49742e-90	0.640766
				S100A10	1.15318e-104	0.584357		TUBA1C	8.51611e-236	0.635744
				TMEM176B	4.85494e-37	-0.581947		H2AFZ	1.03377e-91	0.63163
				MNDA	3.9618e-63	-0.661304		TUBB4B	3.36748e-178	0.631301
				MS4A6A	7.83704e-55	-0.692375		IFI6	1.07775e-55	0.626221
				C1QB	2.94965e-20	-0.703506		SH3BGRL3	2.0458e-233	0.622208
				C1QA	6.01463e-20	-0.705689		BSG	5.11184e-253	0.614033
				CCR7	1.88003e-11	-0.717988		S100A11	0	0.611148
				FSCN1	7.21452e-19	-0.731639		TXNDC17	1.10035e-247	0.609967
				BIRC3	9.19878e-13	-0.820326		CCT5	5.52583e-216	0.606805
				MARCKSL1	4.60996e-22	-0.856098		FSCN1	1.13807e-157	0.600812
				CXCL9	2.57416e-23	-0.891916		KRT6B	6.76999e-44	0.595083
				CXCL10	1.82994e-17	-0.932815		CCL5	1.17336e-25	0.592273
				CCL19	5.90575e-24	-1.24847		ITGB1	8.3626e-79	0.588144
								CLIC1	1.03243e-265	0.583632
								HIST1H2BK	1.70356e-80	0.582307
								CASP14	8.37383e-57	0.581211
								RPL13A	0	-0.599586
								FOS	5.53038e-149	-0.611874
								RPL36A	2.24322e-139	-0.614038
								EEF1A1	0	-0.61566
								TXNIP	1.01611e-214	-0.619136
								LMO4	4.08619e-212	-0.620885
								LTF	3.60296e-21	-0.624164
								DAPL1	1.85623e-151	-0.625074
								CCL2	5.48549e-49	-0.639857
								EGR1	3.6087e-170	-0.647297
								KRTDAP	3.87046e-18	-0.653319
								DEFB1	1.79481e-90	-0.670934
								MT-ND3	8.16344e-174	-0.684612
								GLTSCR2	0	-0.754225
								KRT15	1.55376e-57	-0.838606
								KRT1	6.21026e-33	-0.886276
								APOE	3.77661e-181	-1.15314
								CALML5	2.58616e-67	-1.19588
								KRT10	4.26599e-101	-1.20112

## Sheet: 8-7
Table 8-7. The DEGs in hypoxia samples across 26 cancer types.
Gene_name	Pan-cancer	BLCA	BRCA	CESC	COAD	ESCA	GBM	HNSC	KIRC	KIRP	LGG	LIHC	LUAD	LUSC	OV	PAAD	PCPG	PRAD	READ	SARC	SKCM	STAD	TGCT	THCA	THYM	UCEC	<=-0.58	>=0.58
LDHA	-1.21396	-2.01269	-1.16253	-1.35309	-1.00381	-1.58318	-1.47658	-1.34436	-0.891589	-1.24119	-1.45262	-0.650741	-1.33908	-1.23317	-1.15668	-1.36458	-1.80029	-0.869402	-0.650811	-1.75197	-0.758535	-1.16517	-1.85753	-0.617583	-1.03122	-1.35456	26	0
ENO1	-1.22342	-1.4887	-1.51138	-1.37736	-1.12043	-1.38505	-0.95687	-1.02659	-1.1212	-0.776651	-0.741281	-1.39222	-1.06332	-1.06751	-1.03582	-1.28251	-1.7655	-0.706356	-0.846981	-2.18934	-1.34704	-1.27855	-2.45865	-0.531941	-1.16728	-1.28778	25	0
PGK1	-1.15341	-1.49752	-1.2558	-1.19024	-0.830691	-0.877194	-1.57168	-1.0217	-1.0348	-1.12179	-0.681617	-0.885352	-1.43833	-1.20298	-1.04311	-1.20338	-0.973499	-0.607309	-0.835216	-1.77313	-0.951778	-0.969108	-1.87175	-0.159487	-0.935831	-1.48712	25	0
TPI1	-1.00264	-1.13692	-1.21408	-0.847594	-0.979779	-1.38095	-1.07498	-0.762556	-0.928662	-0.860637	-0.870458	-0.647921	-1.25774	-0.967841	-0.809771	-1.2233	-1.43204	-0.623309	-0.846258	-1.17867	-1.10838	-1.04572	-1.98273	-0.253533	-1.32769	-0.936182	25	0
PKM	-0.991903	-1.44037	-0.918061	-1.00113	-1.1592	-1.35101	-0.881039	-0.873761	-0.727032	-0.845649	-0.737429	-2.39242	-0.989611	-1.00902	-0.755244	-1.14484	-1.05295	-0.559851	-0.894503	-1.59999	-1.30629	-1.24513	-1.14125	-0.737595	-1.10396	-0.925973	25	0
ALDOA	-0.949933	-1.07297	-0.950826	-1.25685	-1.1725	-1.36497	-0.84423	-0.741851	-0.583742	-0.974509	-0.684343	-1.66759	-1.1829	-1.00852	-0.910146	-1.40882	-0.736687	-0.60532	-0.967001	-1.14745	-1.01304	-1.17321	-1.47639	-0.187994	-1.04441	-1.061	25	0
SLC2A1	-1.84321	-2.30067	-1.50665	-2.40127	-1.38106	-2.72606	-1.36155	-1.59471	-1.29071	-3.00868	-0.437331	-2.75729	-2.69374	-1.83755	-1.40365	-2.68957	-2.12454	-0.315993	-1.7593	-2.69787	-2.49487	-1.80059	-3.5906	-0.755109	-1.32861	-1.94692	24	0
TREM1	-1.37422	-3.13625	-2.01905	-1.6779	-0.827096	-1.75466	-1.933	-1.71845	-1.32648	-2.06739	-1.84313	-3.27306	-1.08615	-0.422808	-1.43241	-1.2935	-3.96291	-0.623974	-1.87969	-2.61963	-2.06606	-1.60683	-2.09215	-1.56857		-1.08896	24	0
PFKP	-1.07172	-1.4365	-1.90198	-0.83362	-1.06229	-0.920221	-0.812122	-1.05656	-0.858256	-0.741219	-0.623835	-2.63446	-1.50255	-0.907026	-0.991011	-1.30244	-1.60066	-0.312494	-0.597244	-0.803495	-1.52475	-0.909034	-1.90769	-0.296075	-1.21064	-1.31795	24	0
GAPDH	-1.04122	-1.3258	-1.41198	-1.02336	-1.08876	-1.62895	-1.06351	-0.784487	-0.718269	-0.892327	-0.760436	-1.00497	-1.6448	-1.18394	-0.635282	-1.36007	-0.68297	-0.529497	-0.956929	-1.22695	-1.3321	-1.18502	-1.75924	-0.143207	-1.35952	-0.951453	24	0
TUBA1C	-0.904034	-1.01595	-1.20029	-0.990904	-0.584606	-1.14363	-1.06633	-0.716278	-0.611126	-0.607889	-0.979476	-1.149	-1.32507	-0.828363	-0.764512	-0.960019	-0.666634	-0.725809	-0.468939	-1.58451	-1.25412	-0.844343	-1.08471	-0.489509	-1.19225	-1.18441	24	0
CA9	-1.80554	-3.6882	-5.70589	-1.33576	-2.64705		-3.18006	-2.57688	-0.827306	-3.86867	-3.00082	-5.10111	-1.27679	-1.56654	-1.87797	-3.3518	-5.56395		-2.79748	-4.27099	-1.9526	-1.06963		-1.56126	-4.72829	-1.81758	23	0
FOSL1	-1.53876	-1.71539	-2.00822	-1.50117	-1.53735	-1.73664	-1.77794	-1.35518			-2.0157	-1.31399	-2.71153	-1.76716	-0.909584	-1.74179	-1.98996		-0.898037	-3.93346	-2.01472	-1.61911	-3.65595	-1.39883	-1.25307	-1.07609	23	0
ADM	-1.45197	-2.16588	-2.3796	-1.99547	-1.30877	-2.3154	-2.6403	-1.52392	-0.391426	-2.38332	-2.37167	-1.19654	-1.96358	-1.99547	-1.94237	-2.86846	-0.734708	-0.615263	-0.607715	-1.91964	-2.08493	-1.46251	-1.84961	-0.460892		-1.56941	23	0
SLC16A3	-1.32383	-1.81993	-1.5543	-0.598587	-1.1729	-0.458696	-1.69598	-1.0059	-1.02788	-1.37115	-0.983565	-2.35081	-1.64931	-0.830861	-1.10671	-1.90853	-3.2186	-0.493653	-0.934259	-1.79387	-1.99311	-1.23757	-2.07806	-0.755712		-1.44915	23	0
EGLN3	-1.28831	-1.35874	-1.08876	-1.54872	-1.75507	-1.59088	-0.854437	-1.69673	-0.810815	-1.9443		-2.2447	-2.32946	-1.85484	-1.0309	-2.73247	-4.37873	-0.306479	-0.852109	-1.17189		-0.810052	-0.990161	-1.40003	-1.24186	-0.642065	23	0
PLAU	-1.27704	-1.82395	-1.04064	-1.32135	-0.796079	-2.0791	-1.2427	-1.24063			-1.89457	-1.43295	-2.09855	-1.31371	-1.28122	-1.62458	-1.60753	-0.282368	-0.650607	-1.21807	-0.75939	-1.33731	-0.869294	-1.29102	-1.05923	-1.13006	23	0
NDUFA4L2	-1.25814	-1.76402	-1.58318	-2.80169	-2.21767	-3.59106	-1.72059	-1.07766	-0.677574	-3.52342	-1.25902	-1.84187	-1.66295	-1.60795	-1.03465	-2.38509	-2.04509	-0.361335	-1.76134	-1.34265	-2.00201	-1.54621	-1.03284	0.460223		-1.80542	23	0
ULBP2	-1.17716	-1.53514	-1.92594	-1.68327	-1.39937	-1.47962	-0.942527	-0.838583	-0.253995	-0.919824	-0.840825	-1.62546	-1.44491	-0.945752	-1.40509	-2.0454		-1.32291	-0.806795	-1.47089		-1.2869	-1.89508	-0.972421	-1.29879	-1.73499	23	0
CDC20	-1.08902	-1.07958	-1.96422	-0.710965	-1.04832	-1.08389	-0.489929	-0.82682		-1.24308	-1.26695	-1.77107	-2.15236	-0.639579	-0.792614	-1.73081	-1.09298	-1.08775	-0.984674	-1.74638	-1.14548	-1.09936	-1.81874		-1.18951	-0.991352	23	0
ANGPTL4	-1.05032	-1.00076	-1.38309	-2.36974	-1.40697	-1.87726	-2.64288	-1.96291	-0.633395	-2.39027	-1.61343	0.518219	-2.43251	-1.3014	-1.32242	-2.41668	-2.49767	-0.710444	-1.34495	-0.992623	-3.00769	-1.41194		-0.801204	1.28055	-2.10485	23	1
RRM2	-0.999997	-1.30589	-1.46162	-0.746962	-0.832068	-0.835702	-0.442585	-0.525644	-0.46508	-1.85133	-0.776497	-1.21045	-2.14879	-0.613055	-0.71515	-1.2743	-0.901982	-1.26918	-0.663245	-1.41497	-0.815505	-1.16053	-1.24677	-0.644624	-1.1428	-1.49326	23	0
BIRC5	-0.992889	-0.867651	-1.69951	-0.591026	-0.795758	-0.948448	-0.508502	-0.628906		-1.43501	-1.21195	-1.51252	-2.21464	-0.634114	-0.772168	-1.38808	-0.820469	-1.11061	-0.726091	-1.39367	-0.941077	-1.18726	-1.04187	-0.488578	-1.43102	-1.15919	23	0
S100A9	-0.960637	-1.64874	-2.58149	-1.35184	-1.08724	-1.94013	-1.39298		-0.57155	-2.9523	-1.48894	-2.33259	-2.36538	-0.809248	-1.14427	-0.746918	-1.64209	-0.714314	-1.18967	-1.28627	-3.36196	-4.37988	-1.58427	-1.47159		-1.41777	23	0
MMP12	-1.40534	-2.0597	-3.1526	-1.52764	-1.50312	-1.7458		-0.697114		-2.37386		-4.67493	-2.46107	-0.852809	-2.02633	-0.870041	-3.65896	-0.718609	-0.890666	-6.36379	-3.34043	-2.14021		-1.3111	-1.36963	-1.85475	22	0
PHLDA2	-1.09327	-1.04161	-1.74215	-0.819562	-1.19917		-1.87685	-0.891069			-2.97728	-1.61978	-1.18593	-1.15941	-0.987119	-1.57287	-1.06228	-0.762264	-1.16936	-2.05596	-1.385	-1.0839	-2.11871	-0.615995		-1.78925	22	0
PGAM1	-1.00254	-1.49109	-0.848592	-1.2428	-1.01271	-1.53979	-0.701672	-0.991972	-0.966483	-1.06544	-0.482483	-0.528745	-1.14478	-1.1761	-0.994202	-0.739642	-0.799927	-0.492503	-0.814493	-0.993015	-1.1251	-0.88851	-1.66758	-0.406839	-0.97006	-1.44143	22	0
DLGAP5	-0.911845	-1.32494	-1.44557	-0.749236	-0.599878	-0.77389		-0.791727		-1.60648	-1.19501	-1.42586	-1.9809	-0.726619	-0.508727	-1.48856	-0.960126	-1.14876	-0.585694	-1.48652	-0.740709	-0.86208	-0.448153	-0.644676	-1.22302	-1.06933	22	0
ACOT7	-0.863252	-0.93657	-1.22012	-1.12925	-0.931551	-1.22116		-0.750698	-0.774068	-1.47706	-0.963563	-0.576266	-1.07135	-0.863195	-0.63787	-0.883823		-0.529598	-0.771554	-1.08781	-0.659005	-0.95004	-1.132	-0.745637	-1.5026	-1.28674	22	0
NDRG1	-1.64474	-2.34303	-2.08848	-2.4917	-1.27347	-2.91466	-1.98468	-1.96451	-1.14668	-1.72895	-0.386322	-1.5838	-1.40887	-1.92235	-1.18841	-1.31176	-2.1884	-0.401896	-0.670064	-1.57984	-1.62115	-0.891477		-0.299161	-0.573662	-2.19578	21	0
KISS1R	-1.59672	-1.02139	-0.90654	-1.55942	-1.65379	-1.56806		-1.0704	-1.06649	-3.43746	-1.61028	-2.30116	-1.69005	-1.66352	-0.997084		-4.79853	-1.35364	-1.93202			-0.743063	-2.14708	-0.524398	-3.32368	-3.33822	21	0
KRT17	-1.46344	-1.94142	-1.80704	-2.3129	-2.39156	-3.67905		-1.05403		-1.56042	-1.46141	-2.04978	-2.27889	-1.38056	-0.668067	-2.46564			-2.32439	-1.73629	-3.81974	-2.214	-2.24541	-2.24096		-1.41004	21	0
MMP1	-1.4374	-2.46657	-2.98716	-2.28475	-1.4281	-1.56721	-2.00478	-1.09186		-5.19123	-1.15506	-2.71061	-0.798473	-1.65873	-1.43951	-1.18626	-3.53623	-1.44234		-4.29253		-0.626701	-1.62289			-1.64016	21	0
SLAMF9	-1.42424	-2.27216	-0.67399	-3.17655	-1.61288	-2.60887	-2.28978	-1.36782	-0.866081	-1.21932	-0.585364	0.780893	-2.18123	-1.19627	-1.52491	-2.50461	-3.91577		-0.971844	-4.98703		-1.51875	-2.01408			-0.745571	21	1
NXPH4	-1.37545	-1.1525	-2.58314	-1.34176	-3.1314	-3.50236	-1.58637	-0.849685	-0.916055	-4.43482	-1.0277	-3.33099	-2.59263	-0.891189	-1.64937	-2.53881	-1.16224		-2.90976			-2.59337		1.60457	-1.23895	-1.97495	21	1
GJB2	-1.23936	-2.93514	-1.20601	-1.75772	-0.462803	-2.74174	-1.79017	-0.676842	-0.88833	-1.02919	-1.46758	0.596051	-2.35441	-1.46254	-1.42543	-1.62087		-0.739948		-1.17252	-2.55205	-1.92677	-2.62647	-0.939961	1.3428	-1.12265	21	2
SFN	-1.21637	-1.87932	-1.67602	-1.60798	-1.18698	-2.93388	-1.47675	-0.795568		-2.03425	-0.937951	-1.60108	-0.898198	-1.49559	-0.76368	-1.52122		-0.425603		-1.72596	-3.64613	-1.90636	-1.84431	-1.42642		-0.833331	21	0
HILPDA	-1.12803	-0.798288	-1.05995	-0.841413	-0.333484	-1.65576	-2.23872	-1.15292	-0.760353	-2.4249	-1.08771	-1.71397	-2.09334	-1.55782	-0.666921	-1.98658	-1.26842	-0.272212	-0.462242	-1.77693	-0.726189	-1.45698	-0.551411	-0.229842	-0.958517	-1.27136	21	0
KRT16	-1.09465	-3.38663	-4.53807	-1.57279	-4.40818	-3.53473		-0.602333	0.871347	-4.44422			-3.06409	-1.33697	-1.39266	-3.01732	1.70402	-0.641663	-1.66647	-2.84511	-4.15401	-4.94005	-2.2747	-2.79294	-4.50078	-2.60479	21	2
P4HA1	-1.0413	-1.34263	-1.17892	-1.02444	-1.0372	-1.18896	-1.18163	-1.15481	-0.923777	-1.27166	-0.421891	-0.384526	-1.21686	-1.12914	-0.973168	-1.64032	-2.11756	-0.482297	-1.11165	-0.985827	-0.72123	-1.07455	-1.25248	-0.3486		-0.928766	21	0
PLAUR	-0.998538	-1.41498	-1.26489	-0.623835	-0.834687		-1.20307	-0.758789		-0.610202	-1.57978	-1.9351	-1.07396	-0.555284	-0.968104	-1.34462	-2.63458	-0.365227	-0.673376	-2.47522	-1.78255	-1.04332	-0.512255	-1.38364	-0.636719	-0.801477	21	0
PLK1	-0.995215	-0.848223	-1.67918	-0.700267	-0.925833	-0.754582	-0.489671	-0.725383		-0.776238	-0.464466	-1.70597	-1.89287	-0.592634	-0.748014	-1.3229		-0.865836	-0.912226	-1.31321	-1.1973	-1.10616	-1.52562	-0.232536	-1.49993	-1.30668	21	0
CDKN3	-0.960319	-1.34196	-1.40437	-0.710139	-0.708154	-0.972911	-0.644091	-0.669278		-1.4339	-1.00212	-1.13322	-2.19541	-0.946048	-0.965736	-1.12972		-0.952661	-0.696693	-1.44204		-1.04009	-0.441424	-0.4326	-1.11858	-1.02561	21	0
HK2	-0.926526	-1.10308	-0.408007	-1.15916	-0.594618	-0.966025	-1.16849	-0.790834	-0.85703	-1.00744	-0.536831	-2.45609	-1.06068	-1.30488	-0.43941	-1.75208	-4.15189	-0.577462		-2.17733	-1.21866	-1.24885	-1.42482	-0.59626	-0.615449	-1.31241	21	0
SPHK1	-0.925148	-2.01365	-1.10675	-0.666235	-1.12597	-1.60754	-0.76758	-0.495202	0.370471		-0.592625	-1.88029	-1.87118	-0.751306	-0.881622	-0.950807	-2.41206	-0.408915	-1.11594	-1.85423	-1.3369	-1.21158	-1.17092	-0.824314		-1.40276	21	0
ENO2	-0.785419	-0.9431	-0.844596	-0.763812	-1.23114	-1.61009	-0.979019	-0.761461	-0.52143	-1.05786	-0.785961	-1.91861	-1.10531	-1.08015	-0.784577	-1.04896	-0.339336		-0.787461	-1.38766	-1.65525	-0.316561	-0.986203	0.295826	-1.31321	-1.23426	21	0
GPI	-0.771263	-0.864587	-1.1262	-1.04154	-0.658828	-1.07885	-0.742806	-0.628876	-0.509948	-0.874279	-0.93889	-0.297238	-0.889731	-0.842229	-0.659759	-0.786437	-0.264286	-0.440386	-0.586738	-1.00003	-0.709581	-0.775581	-0.905053	-0.155841	-1.02784	-0.975525	21	0
S100A2	-1.66893	-2.59611	-3.80212	-1.87326		-3.60729		-1.18509	0.643826	-1.27122	-0.410058	-1.73123	-2.59723	-1.78574	-1.77138	-4.12767			-2.92565	-3.25657	-3.15033	-4.7745	-1.55774	-1.88137	-2.41614	-1.4023	20	1
CXCL8	-1.54973	-1.86113	-2.36219	-1.74112			-2.59518	-1.97855	-0.740657	-1.50251	-2.44752	-1.14842	-1.83178	-1.75652	-1.4287		-2.13202		-1.9491	-4.54709		-1.95622	-2.21207	-1.41862		-1.12927	20	0
FGFBP1	-1.54155	-3.92129	-3.67938	-1.85158	-1.54934	-3.16333		-1.13033	0.857912		-1.64272		-1.97219	-1.49757	-1.61637	-1.8425			-1.23336	-4.12836	-3.3963	-2.85915	-2.9158	-2.7298	-5.64168	-0.767877	20	1
CREG2	-1.36977	-1.49258	-1.08433	-1.5486	-0.96182	-1.45887	1.23336	-1.06662		-1.59407	-1.90168	-1.68116	-2.31603	-1.22347	-0.675381	-1.61097		-0.582042		-1.50609		-1.14744		-0.86824	-2.96787	-1.51103	20	1
MCHR1	-1.32686	-0.826765	-0.673026	-0.636574	-0.887577		-2.05394	-0.80628	-0.999608	-2.13749	-1.50949	-0.641263	-1.3164	-0.892171		-1.15678	-2.89191		-1.34158				-2.20885	-2.07449	-1.29481	-1.16931	20	0
SERPINE1	-1.30783	-1.45228		-1.65475		-1.86109	-2.55131	-2.01882	-0.594606	-1.52366	-2.3985	-0.908242	-1.52126	-1.14954	-0.716862		-3.15833	-0.75163		-3.13779		-0.930045	-2.42361	-1.07419		-0.779913	20	0
TNFSF9	-1.18041	-1.50852	-1.08553	-1.28236	-1.97537	-1.37239		-0.953765	-0.347745	-0.810745	-1.03294	-1.68596	-0.667055	-0.545897	-0.96847	-1.95214	-0.764594		-1.9892			-2.35592	-2.38488	-1.28857	-1.20453	-1.93218	20	0
SPP1	-1.11542	-2.59117	-1.62572		-0.935339	-2.16079	-1.24496			-0.830805	-0.965691	-2.51916	-2.25727	-1.19705	-1.33497		-3.54214	-0.894002	-1.58911	-2.63154		-2.19371	-2.41508	-1.46092		-1.27693	20	0
DDIT4	-1.09801	-1.80115	-1.27659	-1.3365	-1.09267	-1.19681	-1.0628	-1.52003	-0.484215	-1.39047		-0.769242	-1.26033	-1.3047	-0.864603	-1.27786	-0.520158	-0.420431	-0.919235	-0.573086	-1.14741	-1.20366	-1.10526	-0.405716	-0.738096	-1.35517	20	0
SLC7A5	-1.06385	-1.53297	-1.95516	-1.6108	-0.392934	-1.65997		-0.974245	-0.554166	-1.30682		-0.88707	-1.54611	-1.0481		-1.33581	-1.5994	-0.463749	-0.758426	-1.38606	-0.843299	-1.3915	-1.03183	-1.11006	-1.21973	-0.728196	20	0
PFKFB4	-1.05356	-1.15388	-0.764905	-1.57294	-1.05402	-1.28648	-1.38255	-0.951809	-0.805835	-1.35751		-1.89061	-1.65317	-1.22528	-1.0841	-0.882418		-0.212537	-0.532765	-1.66276	-1.79836	-0.94887	-1.04903	-0.274676		-1.39236	20	0
LOXL2	-0.925236	-0.947955	-1.00303	-1.16691	-0.445216	-0.6249	-0.842826	-0.789534	-0.968268	-1.30879	-1.3004	-0.71129	-2.32241	-0.893279	-0.865162	-1.91051	-2.5207	-0.363134	-0.53327	-1.16684	-1.39183	-0.806829	0.627365	-0.294873		-0.884962	20	1
CCNB1	-0.900405	-1.09129	-1.16773	-0.621235	-0.734332	-1.03902	-0.434951	-0.670754		-1.23722	-0.856352	-1.52306	-1.91317	-0.611738	-0.554	-1.27472		-0.685722	-0.864429	-1.35262	-0.514406	-1.15238	-0.963408	-0.112082	-1.07513	-1.05549	20	0
TK1	-0.888325	-0.892605	-1.38972	-0.49348	-1.18521	-1.07161		-0.530039		-1.04693	-1.0829	-1.03209	-1.79979	-0.545353	-0.908182	-1.28391	-1.02259	-0.825999	-0.909261	-1.09325	-0.870906	-1.17602	-1.26328		-1.43474	-0.833018	20	0
KPNA2	-0.828547	-0.786305	-1.34272	-0.612774	-0.542071	-0.936737	-0.345188	-0.608058		-0.872677	-0.702848	-1.19335	-1.60975	-0.566743	-0.724735	-0.634697	-0.496174	-0.912788	-0.595853	-1.1013	-0.799902	-0.987158	-0.673036	-0.491782	-1.12567	-1.08826	20	0
TNFRSF12A	-0.818507	-1.11221	-0.967752	-0.785142	-0.630903	-0.698447	-1.12699	-1.2046	-0.352663		-1.88919	-0.684213	-0.928588	-1.10944	-0.505639	-1.1469	-1.21592	-0.438395	-0.579107	-2.11962	-0.868092	-1.00687	-2.15964	-0.954499		-1.15144	20	0
MIF	-0.803531	-0.671441	-0.825113	-1.00255	-1.24374	-1.83511	-0.990137	-0.735839		-0.350813	-0.384487	-0.707035	-1.14867	-0.997095	-0.972447	-1.04702	-0.644324	-0.460753	-1.22433	-1.11692		-1.03822	-0.646749		-1.02576	-0.844541	20	0
GNA15	-0.797537	-0.872659	-0.752147	-1.25111	-0.87817	-2.17055	-1.03357	-0.618301			-0.621341	-1.03576	-0.708053	-0.886963	-0.587353	-1.42538	-1.21026			-0.722665	-2.45994	-1.04193		-0.826564	-1.14308		20	0
PI3	-0.602548	-3.48304	-1.78505	-1.55227	-1.56393	-1.05603	-3.05139			-2.08407	-2.53105	-1.44612	-4.15482	-0.745996	-1.16386			-1.02762		-1.46872	-4.55937	-1.02264	-3.44429	-1.04082		-1.66741	20	0
KRT80			-1.30055	-0.48854	-0.61361	-0.819968	-1.65565		-0.496719	-0.629267	-1.38801	-2.18368	-1.31819		-0.780225	-0.974294	-1.79863	-0.690775	-0.767364	-2.61095	-3.13819	-1.4422	-1.56451	-1.13449	-2.78927	-0.989294	20	0
CCL7	-1.68929	-2.38748	-3.52441	-0.855108	-1.03417	-1.19747	-2.25176		-1.35568		-3.35541	-2.93661	-2.24554		-1.46548	-1.88236	-3.36395			-3.35051		-2.97877	-3.80339	-1.10293		-2.14121	19	0
FAM83A	-1.67142	-2.86529	-2.21901	-1.42453	-1.65687	-3.04668		-1.18442	0.847468	-4.30237		-1.4914	-2.35594	-1.50009	-0.650858	-2.98207	1.82157	-0.568077	-1.73938	-2.18832	-3.57658	-2.43925		-1.61358	5.45586	-1.67826	19	3
IGFL2	-1.58882	-3.0165	-0.942405	-2.02029	-1.94052	-3.10034		-1.41736	-0.965416			-2.33262	-1.51839	-0.720642	-1.63321	-2.04033		-2.14964	-1.63428			-2.04184	-2.77223	-1.7312		-1.36946	19	0
KRT6A	-1.23391	-5.01176	-5.1885	-2.0842	-3.97927	-2.63117		-0.598413	1.23003				-2.88953	-1.32654	-2.37706	-4.07234		-1.35335	-2.66944	-2.70959	-3.70407	-6.33631		-2.95542	-1.98873	-2.14058	19	1
KRT5	-1.21211	-4.04784	-1.78367	-1.54116	-4.12852	-3.23838	2.50851	-0.728015	1.45597	-2.73836	-0.688016		-2.34363	-0.993617	-0.892804	-2.82696			-4.16237	-1.87224	-3.03864	-6.21071		-2.50884		-1.49002	19	2
GJB3	-1.18857	-1.48308	-2.9498	-1.11309	-1.08111	-2.12588	-1.80851	-1.00543			-1.35118	-1.737	-2.31639	-0.987594	-0.559905	-1.8735			-0.877093		-2.44295	-1.40687	-1.09385	-1.05783		-0.952795	19	0
MMP3	-1.13905	-1.8877	-0.544168	-2.1051	-1.11232			-1.05486	0.950056		-2.34885	-3.47042	-2.13288	-2.10814	-1.47815	-2.21634	-2.68374	-0.708082		-4.88919	-1.65472	-0.915762	-3.01475	-1.64817	2.29689	-1.89356	19	2
HSPA6	-1.09384	-1.23544	-0.844282	-2.00645	-1.45507		-1.56341	-1.18194		-1.14974	-2.24274	-2.35342	-1.78219	-1.78408	-1.05453	-3.70627	-2.74542			-2.23445		-0.96615	-2.80243	-1.14438		1.48901	19	1
C6orf223	-1.08738	-2.56937	-1.69836		-0.896557	1.57906	-1.81475	0.693104	-0.604899	-5.58045	-1.47548	-2.15896	-1.24928		-1.26821	-2.11945	-1.58874		-0.974687	-2.47013	-1.82394	-1.84822			-3.14529	-1.53842	19	2
CD70	-0.969159	-2.03612	-0.803184	-2.31631	-2.32401	-0.912674	-2.01215	-0.600362	-0.553301	-1.78037	-2.56338	-1.82936	-1.22404			-2.30125			-2.65423			-1.2618	-2.36156	-1.4487	-2.90231	-0.766603	19	0
APLN	-0.925361	-1.48639	-1.17246	-2.00216	-0.801105		-0.806188	-1.42141	-0.65936	-1.69994	-0.676665	-0.612535		-0.43435	-1.0512	-2.1316			-0.768348	-1.75932	-1.99828	-1.12408	-2.12561			-1.1954	19	0
CDCP1	-0.892072	-1.38635	-0.732207	-1.12234	-0.560891	-0.767264	-1.33035	-0.903698		-1.05004	-0.737837	-1.20931	-1.23703	-1.16063	-0.449527	-1.27997		-0.409571		-2.46739	-1.61935	-1.03176	-0.749115	-0.771209	1.52381	-0.701759	19	1
AK4	-0.8582	-2.30008	-1.13142	-1.21115		-0.607889	-0.630917	-1.0315	-0.943394	-0.829612	-1.02137		-1.51632	-1.19595	-0.965902	-1.27383	-2.49033	-0.198239		-1.41327	-1.04802		-1.06375	-0.523316	1.14369	-0.869019	19	1
CEP55	-0.850987	-0.978251	-1.51218	-0.607657	-0.485823	-0.952523	-0.734352	-0.685941		-1.55015	-1.15301	-1.76585	-1.99706	-0.707953	-0.760066	-1.37174	-0.507464	-0.790152	-0.476299	-1.5106		-0.93089		-0.490744	-0.79199	-0.650041	19	0
AURKB	-0.846595	-0.79824	-1.60544	-0.512577	-0.918517	-0.997966		-0.434874	0.388336	-1.22008	-0.956251	-1.39319	-1.78225	-0.495372	-0.510262	-1.18454	-0.822167	-0.712531	-0.755429	-1.35299	-0.710837	-0.891524	-1.50488	-0.483766	-1.18886	-0.818206	19	0
UPP1	-0.844192		-1.07645	-1.62975	-0.786838	-1.79482	-0.995401	-0.978836	1.22671		-0.899448	-0.765042	-0.962585	-1.24944	-1.21328	-1.07188	-0.39067			-1.07133	-1.00678	-0.695926	-1.91053	-0.86535		-0.792596	19	1
ANXA2	-0.823994	-1.5454	-0.728235	-0.737693	-0.729524	-0.947072	-1.09711	-0.830504	-0.42593	-0.4181	-1.27386	-1.03614	-0.69849	-0.955206	-0.517306	-1.11853	-0.711339	-0.432956	-0.569442	-1.27454		-1.00015	-0.693855	-0.91943		-0.671458	19	0
AREG	-0.820533	-1.56904	0.566436	-1.68206		-0.832045	-2.02392	-1.96805		-0.962436	-2.01238	-2.34515	-1.13517	-1.56846		-1.63891	-3.58788			-1.54069	-1.96347	-1.58897		-2.06706	-1.12322	-1.4591	19	0
CDC45	-0.80244	-0.740645	-1.53154	-0.487375	-0.973106	-1.02325		-0.24357		-1.0651	-0.746009	-1.19634	-1.87926	-0.588063	-0.715821	-1.43116	-0.832329	-1.06238	-0.967832	-1.04326		-1.16305		-0.260706	-1.29554	-1.11108	19	0
P4HA2	-0.797207	-1.22105	-0.883054	-0.79531	-0.497509	-1.3881	-1.10978	-1.20884	-0.752692	-0.817045	-1.03633	-0.517806	-0.772874	-0.976647	-0.688424	-0.574363	-0.608331	-0.301621		-0.665662	-0.771596	-0.647674	-0.724584	-0.518946		-0.626148	19	0
PLOD1	-0.794532	-0.935127	-1.27611	-0.623897	-0.620068	-0.786572	-1.14797	-0.841592	-0.973584	-0.998142	-0.790382	-0.550672	-0.77971	-0.833408	-0.480263	-1.1041	-1.31081	-0.299334	-0.457748	-1.14563	-0.848877	-0.721829			0.667871	-0.725469	19	1
TUBA1B	-0.748433	-0.816227	-0.822009	-0.502944	-0.810852	-0.711172	-0.582738	-0.644009	-0.742796	-0.748498	-0.723606	-1.04222	-1.27757	-0.379099	-0.754817	-0.460414	-0.41157	-0.495438	-0.674117	-0.713906	-0.708514	-0.980725	-0.479766	-0.413381	-1.2308	-1.39088	19	0
S100A8	-0.666494	-1.66132	-3.45192		-1.28477	-2.11288	-1.28992			-3.58881	-1.39084	-1.655	-2.95302		-1.05164		-0.986016			-1.5914	-2.90962	-4.94813	-1.52965	-0.833581	-3.07018	-0.779049	19	0
SCD	-0.612667	-1.26163	-1.22798	-1.06538	-0.59585	-1.41883		-0.486606	-0.61397	-1.20858	0.251959		-0.591191	-1.13622	-0.979442	-0.812652	0.539295	-0.866158	-0.613766	-0.753061		-1.14004		-0.921419	-1.23815	-1.08126	19	0
PITX1	-0.601295	-1.43013	-0.662352	-0.900201	-0.769424	-1.20197	-1.36238	0.54764		-2.61089	-1.25703	-2.13885	-1.48965	-0.594432		-1.65156			-1.06064		-3.73738	-1.05243		-1.2555	-4.08854	-1.30675	19	0
NMB	-0.586345		-1.07732	-1.02268	-0.677846	-1.85148		-0.466289	-0.952594	-0.974999		-1.35365	-0.668566	-1.25692	-0.467983	-1.24148	-1.27898	-0.194719	-0.761601	-1.53461	-0.912002	-0.674299	-1.09072	-0.875669	-2.36454	-0.377289	19	0
STC2		-0.976589	1.13468	-1.62119		-1.6526	-1.12158	-1.34874	-0.59837	-3.3178	0.409647	-1.9893	-2.07137	-1.27602	-0.929529		-2.6703	-0.605962		-1.46887	-1.91718	-0.583428	-4.06973		-1.26876	-0.895375	19	1
LAMC2	-1.55635	-3.31243	-1.08778	-1.89262	-0.345809	-2.17242	-0.795258	-1.79958			-0.959519	-2.33029	-2.01899	-1.72065	-0.358708	-1.63266	-1.84525	-0.613904			-2.27299	-1.1442	-0.639424	-0.748329		-0.466042	18	0
IL1A	-1.52455		-1.08079	-3.59141	-0.932114	-3.28941	-0.730886	-1.5956	0.54452	-0.763421			-2.87295	-2.6118	-0.619249	-2.10139			-1.81679		-2.43668	-1.09582	-1.08253	-0.87672		-1.69825	18	0
UCN2	-1.42593	-1.55147	-1.05336	-1.61781	-0.838098	-2.40217	-1.88547	-0.853855		-1.58825	-1.68688		-2.46022	-0.745638		-1.95431		0.352863		-1.84077	-2.58478	-0.893479	-3.49795	-1.38132			18	0
S100A3	-1.37037	-3.81233	-1.2731	-1.9222	-1.15032	-1.49736		-0.516345		-0.901181	-0.987634	-1.99993	-0.604228	-0.49907	-1.32335	-1.16458	-1.75443		-1.10603	-1.66132		-1.10003	-0.990057	-0.611948			18	0
GJB6	-1.17821	-1.91577	-3.65149	-1.90622	-1.38132	-3.87068	2.02382	-0.754528		-6.50995	-1.7583	-2.81328	-1.62258	-1.04788	-1.29194	-2.62182		-1.19379		2.38748		-4.44449	-3.12174	0.52411		-0.695669	18	2
SERPINB4	-1.16304	-2.88574	-4.92979	-1.04555	-4.97932					-5.5152		-6.18602	-2.87662	-1.16381		-1.69026		-0.821549	-1.66289	-3.60165	-3.03613	-4.00663	-2.85014	-1.49977		-1.24937	18	0
IL11	-1.16063	-1.17814	-0.933965	-0.651023	-1.03358		-1.60231	-1.19803	2.10395	-0.738094	-0.44858	-4.56668	-2.06759	-1.0129		-1.70445				-2.34259	-2.51834	-1.34804	-2.16053	-1.3717	0.830244	-1.97532	18	2
EREG	-1.16055	-2.59689		-1.44457		-1.49402	-2.74597	-1.27314	0.897194		-1.74108	-3.1298	-2.19925	-3.26783		-2.26196	-5.25908			-1.90527	-2.35011	-2.40082	-1.66151	-2.51607		-1.02785	18	1
KRT6B	-1.13046	-6.12301	-2.61393	-1.76479	-1.54579	-2.76915		-0.640819	1.17552				-2.69635	-1.57132		-1.16787		-1.52884	-2.53577	-2.34724	-3.88549	-3.54593	-3.09393	-3.30743		-2.0922	18	1
GJB5	-1.11885	-1.62816	-1.99669	-1.2877	-2.16979	-2.81443		-0.742197	-1.20462	-2.15652	-0.661897		-1.39057	-1.02335		-2.50844	1.89359		-2.32259		-2.36066	-2.089	-0.630396			-0.942372	18	1
ARSI	-1.09252	-1.99054	-0.832455	-2.04782	-0.592166	-2.74092	-2.00708	-1.28214	1.89175		-1.21991	-1.5584	-0.995953	-1.28856	-0.672496	-1.16929			-0.778423			-0.806367		-2.04817		-1.20393	18	1
ERO1L	-1.02292	-1.26401	-1.00452	-1.26131	-0.726171	-1.02706	-1.1588	-1.08804	-0.430225	-0.944334	-0.372232	-0.375341	-1.5703	-1.53772	-0.664796	-1.68294	-0.791022		-0.425506	-1.49046	-0.580116	-1.02841	-0.508691	-0.24496		-0.800207	18	0
PLOD2	-1.00496	-1.74838	-1.26159	-1.33421	-0.286298	-0.960312	-1.2282	-1.08268	-0.871958	-0.662733	-0.658163	-0.88367	-2.28679	-1.03685	-1.08644	-1.2246	-0.461654	-0.314702		-1.76313			-0.804922	-0.125948		-0.647785	18	0
ORC1	-0.927289	-1.01262	-1.58078	-0.552933	-0.869303	-0.859914		-0.299116	-0.275626	-1.04996	-0.762339	-1.43141	-1.73835	-0.424867	-0.512183	-1.01116	-0.358117	-0.742505	-0.887815	-1.1065	-0.904138	-1.07048	-1.91383	-0.387086	-1.31105	-1.2727	18	0
TUBA4A	-0.88748	-1.62043	-1.22228	-0.907983	-0.587407	-1.49734		-0.746119	-0.326415	-0.995813	-1.77453	-0.558062	-1.09272	-0.836872	-1.10138	-0.955558			-0.334059	-0.686243	-2.80295	-0.779961		-0.419698	-0.79445	-1.35296	18	0
FOXM1	-0.866438	-0.801194	-1.69019	-0.46133	-0.616881	-0.996653		-0.503476		-1.10773	-0.801429	-1.38519	-2.13458	-0.474812	-0.449368	-1.4518		-0.89245	-0.678836	-0.863234	-1.03204	-1.02419	-1.35304	-0.331568	-1.23294	-1.31313	18	0
S100A10	-0.860195	-1.81188	-1.21595	-1.12639	-0.474115	-0.935507	-0.968546	-1.01087	-0.490412	-0.340552	-0.927585	-0.622917	-0.971099	-0.962316	-0.658569	-1.11662	-1.0765			-0.982333		-0.696589		-1.18493		-0.875296	18	0
C10orf55	-0.85855	-1.41571	-0.700943	-0.817015	-0.501365	-1.99388	-0.651663	-0.646934	0.444435		-1.24041	-1.55827	-1.44784	-0.841973	-1.01757	-1.29542			-0.682531	-0.721918		-1.09054	0.432555	-0.789897	-1.23874	-0.577178	18	0
GJB4	-0.858379		-1.90793	-0.648434	-1.19044	-2.13325		-0.763094	-0.737619	-1.62701		-2.0385	-0.701295	-0.847618		-2.0432			-1.04066			-1.29369	-1.36895	-1.40547	-2.04471	-1.59411	18	0
HES2	-0.854773	-2.35117	-0.794769	-0.830003		-2.39763	-3.55043	-0.375945		-0.80449	-0.98049		-1.80969	-0.805443		-2.31501	-1.6655	-0.398771		1.13727	-2.03952	-1.4814	-1.31891	-1.0421	-1.3677	-0.602441	18	1
CCNA2	-0.848924	-1.09248	-1.39846	-0.634185	-0.608683	-0.871981	-0.41144	-0.581513		-0.524237	-0.481317	-1.02888	-2.0702	-0.450582	-0.620967	-1.22466		-0.60656	-0.609426	-0.957899		-1.19079	-1.35051	-0.248263	-1.0597	-1.0727	18	0
MCM10	-0.832606	-0.688366	-1.59243	-0.600756	-0.613047	-0.838329		-0.300078		-1.52795	-0.659948	-1.46196	-1.95744	-0.268663	-0.331073	-1.18322		-1.25361	-0.596225	-1.04143		-1.03719	-1.05357		-1.05464	-1.18806	18	0
CDCA5	-0.829118	-0.757352	-1.55751	-0.634344	-0.655928	-0.918923		-0.553728		-1.37112	-0.710865	-1.11835	-1.87875	-0.409378	-0.543163	-1.37567		-0.881782	-0.628189	-1.1842	-0.846457	-1.2083		-0.537933	-1.49087	-1.13587	18	0
FAM64A	-0.794404		-1.57431	-0.350235	-0.598601	-1.01579				-1.17203	-1.04654	-1.63208	-2.10994	-0.433295	-0.558696	-1.2577	-0.697614	-1.00368	-0.597991	-0.682285	-0.901445	-1.16778	-1.30487	-0.495736	-1.2864	-1.28086	18	0
SHCBP1	-0.785281	-0.954944	-1.39065	-0.880264	-0.563385	-0.772873	-0.447873	-0.843053		-1.60829	-0.719388	-1.65618	-1.65259	-0.561057	-0.597825	-1.11013	-0.705534	-1.16883	-0.405569	-0.942917	-0.726905	-0.752602		-0.452865	-0.885773	-0.505824	18	0
PDK1	-0.774698	-0.950571	-0.840158	-1.07231	-0.587807	-0.939132	-1.51064	-0.900752	-0.585007	-1.31271	-0.573575		-0.574742	-0.842802	-0.975036	-1.04073	-1.1243	-0.397619	-0.629817	-0.835822	-1.07572	-0.339383			-0.542633	-1.05185	18	0
PNP	-0.762268	-1.09887	-1.04842	-0.475124	-0.709868	-0.4066		-0.752178	-0.289069	-0.326048	-0.354666	-0.336881	-0.930924	-0.792783	-0.759611	-0.651182	-0.354249	-0.618129	-0.779192	-1.31362	-0.917938	-0.942915	-0.602182	-1.21697	-0.916467	-0.870964	18	0
S100A16	-0.762106	-1.63825	-0.817518	-0.567007	-0.979948	-1.12254	-0.700391	-0.335021	-0.452539		-0.727315	-0.432773	-1.16377	-0.68409	-0.739612	-1.24531	-1.13279		-0.489951	-1.17607	-1.64954	-1.28918	-0.929216	-0.699167	-0.605156	-0.323638	18	0
KIF20A	-0.761832	-0.842201	-1.33535	-0.639064	-0.560144	-1.02053		-0.456799		-1.51039	-0.920433	-1.44126	-1.68565	-0.386376	-0.644567	-1.39694	-0.632652	-0.840251	-0.657797	-0.79273		-0.944589	-0.406901		-0.705163	-0.733502	18	0
MTFP1	-0.757771		-0.806458	-0.379209	-1.01672	-0.732399	-0.985751	-0.738878	-0.479312	-0.44623	-0.565193	-0.543882	-0.972007	-1.0917	-0.864005	-0.805986	-2.1647	-0.312087	-0.80169	-1.29084	-0.695149	-1.02088	-1.15736	-0.174466	-1.17593	-0.811035	18	0
LGALS1	-0.748312	-1.32495	-0.878448	-0.769569	-0.80564	-1.66007	-1.18417	-0.953517	-0.320036	-0.648764	-1.23981	-0.88995	-1.62868	-0.736088	-1.03036	-1.08075			-0.854439	-0.95105				-0.779558		-0.560569	18	0
MYBL2	-0.740221	-0.617521	-2.00694	-0.598166	-0.435151	-0.565856		-0.357786		-1.50035	-1.19664	-1.84975	-2.22111	-0.350379	-0.849864	-1.38709	-0.641375	-1.26484	-0.636097	-1.03377	-0.760168	-0.736217		-0.34489	-1.38898	-1.08041	18	0
CKAP2L	-0.722697	-0.732982	-1.14017	-0.82038	-0.339268	-0.869623		-0.672141		-1.69383	-0.699993	-0.973777	-1.83102	-0.63395	-0.434895	-1.35878		-0.918584		-0.884726	-0.676793	-0.640188		-0.520485	-0.776108	-1.11072	18	0
ANKRD37	-0.582918	-1.06074	-0.642207	-1.52451	-1.3171	-1.01611	-0.817198	-0.803135	-0.487242	-0.330947	-0.203292	0.543919	-0.5643	-0.721601	-0.638642	-1.27722	-0.736875		-0.888687	-0.873579	-0.861535	-1.22295		0.481566	-0.624243	-0.698082	18	0
IL1RN			-0.514551	-1.07602	-1.1945	-1.0949	-1.51162			-1.30843	-1.98449	0.63737	-0.875591	-0.93497	-0.554375	-1.29758	-2.17632		-1.36294	-2.54128	-3.49057	-1.78332	-1.35025	-1.33178	-2.033	-1.11157	18	1
ALDOC		-1.29561	-1.49458	-1.36307	-1.22776	-1.76556	0.808997	-0.754384	-0.941689	-1.7154			-1.05117	-0.947184	-0.696875	-1.60266		-0.428552	-1.08726	-1.15246		-1.00031	-1.14478	-0.386644	-0.993333	-1.88333	18	1
CPA4	-1.50049	-3.87	-2.45071	-1.75854		-2.72099		-0.945794	-1.06623	-1.50701	-1.30969	-2.58061		-0.85462		1.01244			-1.07509	-3.4149	-2.01399	-1.43583		-1.45665		-1.15169	17	1
APCDD1L	-1.24018	-3.189	-1.34189			-2.55913	-3.38305	-1.56597	-1.29688	-2.25089	-1.87032	-4.33269	-2.74076	-0.648689		-2.46531				-1.84924	2.43269	-0.637476	-1.10568	-1.21806	1.46918		17	2
SERPINB5	-1.22949	-2.26479	-1.72312	-1.56105	-1.1657	-1.8118		-0.761375	1.13505	-2.97429		-1.24584	-2.60322	-1.17881		-2.07149			-0.97516			-1.80861	-2.41502	-2.22089	0.738931	-1.44775	17	2
MMP13	-1.16845	-2.82483	-1.58316			-3.37984	-5.862			-7.28532	-1.81809	-3.15033	-1.63328	-1.72322	-2.43178	-3.79102		-0.713947		-2.31858		-1.82839		-1.68655	2.12662	-1.86193	17	1
LAMB3	-1.16691	-1.84017	-0.76521	-1.37656	-0.337606	-1.47015		-1.36653	-0.967543	-1.86943	-0.245936		-1.09809	-1.01826		-1.65493				-1.56887	-1.30648	-0.81398		-1.51648	-1.66006	-0.978607	17	0
KLK6	-1.14418	-5.33549	-3.50407		-1.96084	-1.41387			1.01616	-2.70764		-2.69233	-3.06414	-1.7673	-1.03411	-2.35797			-1.40946		-2.64376	-1.3857	-2.76933	-1.37774	3.89136	-1.80713	17	2
ANXA8	-1.08601	-1.24414	-1.78966	-1.20503	-2.18187	-2.64134		-0.737072	-1.72014	-4.79134		-1.74367	-1.51954	-0.88262		-2.66475				-1.02367	-2.53943	-3.08091		-1.70258			17	0
TMEM45A	-1.08041	-3.63688	-1.83728	-0.849432	-0.574452	-2.39761	-1.45536		-1.08929	-1.98203		-0.747577	-1.40229	-0.766716	-0.477888	-1.1074	-1.9142			-1.01775	-1.81694	-0.519259	-1.96576			-0.672216	17	0
SERPINB2	-1.07819	-2.76859	-2.14187	-1.40684	-2.89572	-1.76179		-0.630335	-1.85066		-3.39946		-1.57379				-2.26207		-2.89107	-1.70817		-2.91852	-1.73036	-1.56482		-0.943633	17	0
TMEM158	-1.07266	-0.690276	-1.90818	-1.15007	-0.442173	-1.59187	-1.08368		0.443809	-1.06376	-0.491342	-2.65482	-2.0154	-0.996887	-1.16826	-1.72561				-2.64294		-0.6865	-1.26573	-0.926358		-0.617909	17	0
GPR87	-0.96881	-0.962634	-1.97828	-0.953906	-3.12368	-3.07425		-0.650496		-4.12919		-1.7235	-2.02781	-0.742126	-0.990905	-2.69525						-2.48998	-1.66839	-1.80491		-0.939902	17	0
TUBB6	-0.961375	-1.93216	-0.93924	-1.77544	-0.405257	-1.88581	-1.19598	-1.1935	-0.367089		-1.48416	-0.906765	-1.16793	-1.08661	-0.523266	-0.392013	-1.60308			-0.944521	-1.1615		-0.643692	-0.704253	1.22048	-1.07424	17	1
ANXA8L1	-0.938199	-1.25399	-1.49187	-0.931849		-2.2688	2.20538	-0.615941	-1.04887	-2.38207	-0.648569	-2.5649	-0.700146	-0.692259		-2.33332			-3.497			-2.04038	-1.04155	-0.800848		0.868489	17	2
DSG3	-0.927014	-4.27519	-2.38902	-1.36878	-0.898789	-2.35312			1.23181	1.10447	-1.3191		-4.16335	-0.854282	-1.93534	-2.95351				-3.89266	-2.75101	-3.55452	-1.27927	-1.97234		-2.49644	17	2
OSM	-0.900373	-1.01143	-0.737851		-1.17139		-1.09282	-0.965482	-0.454454	-0.814448	-1.08876	-1.45243	-0.643726		-0.684544		-1.60034		-2.40826	-2.18604		-1.76357		-1.18689		-0.744438	17	0
ADORA2B	-0.900329	-1.92652	-1.00814	-0.826337	-0.572343	-1.73968	-0.839006	-0.77848		-0.889833	-0.669109	-1.34095	-0.266278	-1.42667	-0.484663	-1.4565			-0.533644	-0.993357	-1.20033	-1.02041	-1.1447	-0.465224		-0.911098	17	0
MT2A	-0.892237	-2.54459	-0.951147	-1.71616	-1.03594	-1.54555	-1.32541	-1.66834		-1.22021	-0.910042	0.967402	-1.75981	-1.08232	-0.788369	-0.511668				-1.91893	-1.19484	-0.426914	-2.05723	0.30488		-0.979519	17	1
PTGS2	-0.882965	-0.967518	-1.68124				-1.97967	-1.28155	-0.983629		-1.59836		-0.881595	-0.682205	-1.25894	-1.11768	-1.3614			-2.90131		-0.686941	-0.992506	-1.12312	-2.1829		17	0
FN1	-0.876333	-1.55159	-0.730865	-0.958364		-1.15163	-0.860005	-0.495257		-2.68533	-1.15772		-1.16332		-0.959174	-1.43495	-1.80737	-0.680665		-1.01878		-0.412164	-0.858843	-1.55508	2.28098	-1.37863	17	1
PKMYT1	-0.864228	-1.03772	-1.25918	-0.828272	-0.953212	-1.41508		-0.68268		-1.40112		-1.2238	-1.68751	-0.449532	-0.448083	-1.43924		-0.809578	-0.884447	-1.11594		-1.13282	-0.464201	-0.313931	-1.375	-1.06516	17	0
HMGA1	-0.85414	-1.13094	-1.16891	-0.561301	-0.825123	-0.443425	-0.882161	-0.408998	0.518792	-0.79912	-0.59487	-1.41136	-1.7221	-0.449646		-1.24904	-0.470914	-0.189832	-0.720314	-1.94698		-1.15882	-1.96912	-0.883306	-1.33737	-1.08759	17	0
SPOCD1	-0.842703		-0.501831	-1.06171		-0.84461	-1.97711	-0.637318	0.618295	-1.46228	-2.35873	-2.0269	-1.83246	-0.613244	-0.626515	-1.53897		-0.773304		-1.41871		-0.606115		-1.25812	-1.08082	-0.485844	17	1
B3GNT4	-0.837842	-1.60891	-1.19067	-1.24393	-1.03921	-1.56254		-0.903966	-1.10026	-1.51153	-1.0676	-1.03732	-1.64026	-1.02915	-0.554651	-0.903444			-0.98442		-1.0167	-0.48394		0.267201		-1.20749	17	0
SYT12	-0.818899	-2.43519	-0.675913	-0.865913	-1.22527	-1.14845	-0.598657	-1.1633	-0.732899		-0.88341		-1.03189	-0.5744		-0.903937		-0.352214			-1.59369	-0.759683	-2.10393	-1.63083	1.49913	-1.11248	17	1
CDCA8	-0.814573	-0.647235	-1.52212	-0.515525	-0.645203			-0.540207		-1.11815	-1.02309	-1.25966	-1.71143	-0.432408	-0.683822	-1.34235	-0.551702	-0.477455	-0.61982	-1.2835	-0.754182	-0.766266	-0.974699	-0.282144	-1.10567	-1.08038	17	0
TFRC	-0.805553		-1.13444	-1.10798	-0.631519	-0.900723			-0.301925	-0.791822	-0.699444	-0.631968	-0.784533	-0.858766	-0.816106	-0.566612	-0.920777	-0.426769	-0.924761	-1.71987		-0.947518	-0.294567		-0.641345	-1.23988	17	0
CCNB2	-0.800832	-0.758009	-1.53298	-0.467994	-0.67177	-0.749207		-0.467822		-1.10338	-1.02421	-1.25688	-1.946	-0.427162	-0.549088	-1.45766	-0.479504	-0.805356	-0.729487	-1.2803	-0.599062	-0.866705	-0.529868	-0.336782	-1.32022	-1.04974	17	0
HMMR	-0.791647	-0.86825	-1.12394	-0.601091	-0.503603	-0.533859		-0.742329		-1.06089	-0.518212	-1.1349	-1.97053	-0.371005	-0.745661	-1.23574	-0.614519	-0.853195		-0.897701		-0.707108	-1.33786	-0.402709	-0.933743	-1.07404	17	0
KLK8	-0.774039	-4.2623	-2.24931	-1.11003	-1.63713	-1.92168			1.05369	-3.51796		-1.81291	-2.4762	-1.26081	-0.586448	-2.2866				-1.27237	-3.15212	-1.84304		-1.12075		-0.859106	17	1
PBK	-0.758987	-1.1533	-1.10588	-0.337264	-0.750572	-0.529214	-0.506309			-1.80444	-0.726105	-1.1122	-1.96786	-0.413159	-0.728225	-1.24894		-1.02129	-0.636566	-1.13309		-1.17864		-0.646783	-1.11446	-1.0221	17	0
KLK7	-0.748492	-4.83709	-1.49739	-1.15892	-1.99801	-1.26352	1.988			-3.08293	-1.93538	-2.11768	-0.97764	-1.61917	-0.48618	-2.45211			-1.51197			-1.738	-4.86234	-1.14377	2.12224	-1.42864	17	2
PTTG1	-0.747823	-1.14842	-1.43084	-0.654844	-0.553671	-1.03336	-0.568508	-0.3873		-0.915056	-1.13636	-1.3179	-1.4057	-0.470782	-0.838855	-1.40454	-0.427098	-0.80447		-1.12415		-0.977899	-0.928418		-1.13724	-0.714055	17	0
AURKA	-0.731099	-0.906384	-1.34879	-0.521021				-0.67646		-0.918855	-0.744099	-0.97826	-1.6035	-0.475848	-0.548873	-1.33734	-0.711442	-0.614842	-0.38939	-1.35469	-0.674268	-0.684435	-0.883617		-1.11511	-0.972958	17	0
SLCO4A1	-0.728833	-0.930036	-1.35496				-1.22808	-1.15558		-1.43297	-0.578924	-1.24723	-1.38798	-0.545045	-1.05899	-1.7053	-1.13932	-0.312128		-1.01389		-0.8052	-3.07459	-0.918134	-1.00578	-1.8057	17	0
TRIB3	-0.718366	-0.79152	-0.691253	-0.627664	-0.436419			-0.644488	-0.692025	-1.57347	-0.367822	-0.7752	-1.06976	-0.915953	-0.624642	-0.488838	-0.950568			-0.597655		-0.877493	-0.919435	-1.58526	-0.540591	-1.22193	17	0
KRT6C	-0.686195	-6.89723	-4.48874	-1.24276	-3.01088	-1.89529			0.718042			2.31233	-2.2576	-1.41079	-1.48206	-2.81568		-2.08	-1.59135	-4.65786	-4.05359	-8.66566		-1.98135		-1.31274	17	2
MMP14	-0.65432	-1.02895	-0.740379	-0.694637		-1.00324	-0.63312	-0.453234		-0.662259	-1.0159	-1.18061	-1.24825	-0.575561		-1.22922	-2.12963			-0.968477	-0.842244	-0.864142	-0.640361	-0.766507	0.847335	-0.433605	17	1
MALL	-0.633051	-1.69189	-1.10969	-1.09988	-1.02685		-0.811858	-0.386395	-0.967107	-1.05645	-1.23788		0.687169	-0.820446		-1.61536	-0.695879	-0.594459			-2.77948	-1.24451		-0.781804		-2.01972	17	1
IER3	-0.61254	-1.07489	0.212646		-0.615011		-1.06913	-1.01546	-0.315808	-0.74007	-0.8817	-1.00954	-0.571555	-1.24305	-0.412521	-0.733274	-1.09094			-1.77982	-1.34094	-1.32294	-1.43123	-0.671305	0.715641	-0.706198	17	1
IGFL1			-1.9416	-2.98614	-3.84126	-3.50974		-1.2286	-1.01553			-2.68146	-3.85854	-0.921925	-2.54094	-2.61077			-1.86679		-3.20759	-4.52081	-2.93568	-0.978145	2.7032	-2.84153	17	1
SBSN		-3.41257	-5.31086	-1.31676	-1.67363	-2.03588	-0.870845		-2.78756	-5.20499		-2.94726	-4.11418	-0.859762		-1.49998				-5.59096	-3.20335	-6.31328	-4.14169			-1.82403	17	0
VEGFA		-0.585335	-0.940633	-1.06036			-2.08441	-0.858936		-2.32977	-1.80971	-0.408949	-0.775295	-0.744573	-0.759575	-1.34208	-1.80533	-0.361984	-0.456569	-1.68192	-1.2591	-0.714816	-0.693996	0.708724	1.20461	-1.00987	17	2
CSF2	-1.90012	-2.14038	-1.89516	-2.45346	-1.80033	-1.61045		-2.80718					-1.13039	-1.17527		-1.43971			-1.60186	-4.62768	-3.26911	-2.09508	1.71257	-1.46288		-1.5503	16	1
IBSP	-1.54141	-3.18716	-3.31333		-0.945695		-1.91351			-2.16793	-2.98992	-3.12987	-2.39531		-0.675661	-1.55435	-2.0382	-1.32945				-1.6887	2.4324	-1.58118		-0.648992	16	1
KRT14	-1.43436	-5.30563	-1.51077	-2.89273	-6.20137	-3.84334		-0.982414	1.00243				-4.83793	-2.01049		-2.99315				-4.68603	-3.73254	-6.14578	-4.28542	-2.01457		-0.929293	16	1
CALB2	-1.42178	-1.52489	-1.46153		-1.11427	-2.99799		-0.818096			-1.5043	-3.82832	-0.746203	-1.62747		-2.43405	-4.43056				-2.37616	-2.00279		-1.57296		-3.61332	16	0
CLCA2	-1.3361	-2.70285	-1.63005	-1.31274	-1.44792	-2.91111		-0.918661	0.563961	-5.26594			-1.79749	-1.39828	-2.28951	-1.38894				-1.13541	-2.47007	-5.61205		-2.55326			16	0
IL20RB	-1.26867	-3.17098	-2.15334	-1.15305	-0.442034	-2.76803		-0.92148	-1.0293	-2.25456	0.221905		-2.50609	-1.13698		-2.84457				-1.28542	-1.89435	-1.53597	-2.03078	-0.289528	-0.646676	0.684024	16	1
CST6	-1.26438		-1.02335		-1.27036	-1.36117	-1.40071	-0.785444			-2.0675		-1.35422		-0.515676	-2.18234		-0.864571	-5.40387	-3.2005		-2.39969	-2.04995	-1.47784	1.57158	-1.41189	16	1
CDH3	-1.26014	-2.71586	-1.73411	-1.63077	-0.715894	-2.28318		-1.18329			-0.996389	-1.71628	-1.78498	-1.46226		-1.87658			-0.500252			-1.35623		-0.9049	-0.608124	-0.713643	16	0
LGALS7B	-1.23444	-2.67487	-3.48142			-2.88994	-2.00394	-1.06879				-2.11632	-2.33487	-1.01866		-2.14546			-1.16817	-1.58984		-2.47133	-4.53463	-0.555198	-1.83646	-1.71436	16	0
FABP5	-1.1836	-1.63105	-1.71903	-1.27969	-0.677732	-3.15977		-0.883684		-0.718996	-1.61664	-1.50758	-0.529964	-1.45374	-0.544954		-0.395453	0.61482			-1.70108	-1.09556	-1.9449		-0.68248	-0.91298	16	1
FSCN1	-1.16968	-2.04602	-1.35219	-2.18128	-1.28647	-2.88592	-0.491506	-1.16115	-0.254154		-0.354778	-1.21809	-1.84908	-1.30349		-1.6427	-1.15541		-0.893607	-0.542938		-0.774185	-2.1417			-0.660508	16	0
GSDMC	-1.16509	-3.33942	-2.20087	-1.37259	-0.445329	-3.15914		-0.685882	3.14802		-0.504452	-1.48083	-1.09039	-0.897292		-2.29384		-0.974223	-1.22254		-2.49168	-1.75145	-2.9962		-1.36277		16	1
EDN2	-1.14373	-1.50151	-1.21861	-2.14647	-1.05324	-1.76	-1.25637	-1.25019			-3.29467		-1.71547	-0.917691		-1.19507		-0.593596	-0.823242					0.721197	-2.12608	-1.3845	16	1
PCSK9	-1.08578	-2.32372	-1.86787	-1.43535	-1.64304	-1.13847			2.15262		0.847944			-0.839216		-1.21892		-0.651429	-1.60507		-2.11455	-1.47873	-2.42245	-0.805252	-4.21266	-1.07651	16	2
MYEOV	-1.06684	-1.84785	-1.66132		-1.15259		-1.16161			-2.5963		-3.06708	-2.18279		-0.935466	-1.23502			-1.5021	-3.12501		-0.771911		-0.955507	-3.41929	-1.39795	16	0
SERPINB7	-1.04275	-4.72791	-1.75065	-1.01856	-3.1516				-0.549484	-1.4209		-6.0626	-2.53275	-0.590184				-0.745033	-1.55909	-6.44121		-1.04561	-3.87748	-1.17772	2.72175	-1.49961	16	1
DSC3	-1.03327	-2.97729	-1.53696	-1.15858		-2.93162	-2.86966	-0.449601		-1.88033	-1.84174	-1.93395	-1.86268	-0.867814		-1.1638						-3.52906	-1.54739	-1.51641		-1.02506	16	0
SLC2A3	-0.979737	-0.760215	-0.390864	-0.654084		0.77867	-1.76545	-0.491241	-0.41509	-1.45081	-1.49077	-1.09461	-1.10124		-1.13924	-1.13669	-2.01236			-1.72813	-1.64257	-0.589504	-2.77566	-0.811192		-0.405157	16	1
CD109	-0.922267	-2.8595	-0.911819	-1.43608	-0.851949	-1.98715		-0.727049	-0.621694		-0.655248	-0.812148	-1.92979	-0.979134	-0.473887	-1.41176	-0.910646	0.253804		-0.527288		-0.43281		-1.27373	-0.594407	0.436249	16	0
SERPINB3	-0.921794	-2.63146	-3.20547		-3.35341					-5.78586		-5.66605	-2.37329	-0.99		-2.98832		-0.90946		-3.39	-2.69963	-4.17858	-3.64474	-1.29732		-1.39167	16	0
BNIP3	-0.916049	-1.55601	-1.01944	-1.7836		-2.90276	-1.45984	-1.50584	-0.830859	-0.843735	-0.481392		-0.57966	-1.38149	-1.32534		-1.225			-1.6011	-0.84139		-1.65692		-0.496329	-1.35115	16	0
ITGA3	-0.903555	-1.64146		-1.13591	-0.56867	-1.07832	-1.56846	-1.49172	-0.394078	-0.505067	-1.34446	-1.82307	-0.692874	-1.30015		-1.4565				-1.29202	-0.921746	-0.864233		-0.852687	1.17188	-0.91706	16	1
TGFA	-0.901954	-0.664849	-0.954738	-0.905768	-0.525745	-1.17326		-0.861517	-0.875087	-1.25522	0.478507	-0.814295	-1.28319	-0.83806		-0.959202	-0.47209	-0.363345		1.00668	-1.92261	-0.849533		-0.715881	1.15892	-0.946331	16	2
KLC3	-0.897914	-1.57973	-0.748072	-1.69715	-0.729469	-2.15827		-0.765934	0.844066				-0.917075	-0.684678	-0.496669	-0.789911	-1.25675	-0.301214			-2.30731	-0.93125	-0.830016	-0.875719		-0.990042	16	1
KLK10	-0.885295	-5.12939	-1.51261	-1.41421	-1.7893	-1.88471			1.79431		-0.612584	-2.11538		-0.628262		-1.31163			-1.20926		-3.85247	-2.29048	-3.66464	-1.32561	1.93794	-0.649583	16	2
ARNTL2	-0.879575	-1.30443	-1.45081	-0.875213	-0.796405	-1.14295		-0.48361			-0.839168	-0.87375	-2.08616	-0.970509	-0.653678	-1.20363				-1.78038	-1.49209	-0.426952	-0.402635	-0.689694		-0.942199	16	0
SLC6A8	-0.870323	-1.0362	-0.998206	-1.68428	-1.46563	-1.63774		-0.605836	-0.532494	-0.329837		-2.44318	-1.2381	-1.25936	-0.586687	-2.15019		-0.161592	-1.29669	-1.03939		-0.988759	-1.96717			-0.523215	16	0
TNC	-0.861173	-2.25628	-0.847827	-0.661382		-3.4107	-1.04267	-0.822736			-0.863467	-1.4273	-1.22324	-1.17624		-0.839996	-1.58221			-0.891663		0.847866		-1.54144	1.0678	-0.894369	16	2
TRIP13	-0.861009	-0.963438	-1.49335	-0.706635	-0.579661	-0.972639		-0.751028		-0.576747	-0.519353	-1.80643	-1.86054	-0.583581	-0.506589	-1.29684		-0.445327	-0.675969	-0.95755		-0.725868	-0.610203	-0.497902	-0.949273	-0.714765	16	0
CCL13	-0.854756	-1.21502	-1.64398		-1.01313	-1.58999	-1.74521			-0.841323	-0.917344		-0.504447		-1.50619	-0.953868				-2.27679	-1.07931	-1.14134		-1.57283	-1.25655	-0.878453	16	0
KIF2C	-0.844044	-0.851581	-1.70644	-0.526967	-0.534194	-0.614397		-0.496527		-0.969268	-1.09577	-1.74453	-1.95261	-0.34083	-0.524782	-1.45814	-0.527896	-0.78742	-0.521177	-1.39474	-0.886378	-0.870863	-1.00271	-0.263766	-1.20384	-0.972537	16	0
HCAR2	-0.841694	-1.07064		-1.78267	-0.804121	-1.77801	-1.59089	-0.729523		-1.68402	-0.771607	-1.61562	-0.422496	-0.514665		-1.7895			-2.2479	-1.49467	-2.39759	-2.41259	0.625969	-1.10734	1.53048		16	2
SPRR1B	-0.839442	-4.20476	-5.38729	-1.72424	-4.05302	-2.61913							-1.83845	-0.821705	-1.66615	-2.69251				-3.5264	-3.70385	-4.82943	-2.80978	-2.79771		-2.85874	16	0
KRT75	-0.829327	-4.30381	-3.72168			-3.60156	-2.23891		-0.851911	-3.89846	-3.54342	-3.48431	-4.10201					-3.21595		-1.90496		-4.37418		-3.57856	-3.108	-2.11568	16	0
TUBB3	-0.821031		-1.92565	-1.36829	-0.891713	-1.46202	-0.771205	-1.0372			-0.398147	-2.50572	-1.82252	-0.789598	-0.423641	-0.983083		-1.04411		-1.33759	-1.16889		1.0643	-1.28356		-1.17156	16	1
MELK	-0.820685	-0.990035	-1.42115	-0.750209	-0.427448	-0.777899		-0.59762		-1.30113	-0.816891	-1.20834	-1.85086	-0.337935	-0.514336	-1.53401		-0.973669	-0.497176	-1.33642		-0.848538	-0.355081	-0.54102	-0.985517	-1.02283	16	0
ANLN	-0.805173	-1.30535	-1.45569	-1.00134	-0.398627	-0.862373		-0.835536		-1.40342		-1.56217	-2.21305	-0.666709	-0.393122	-1.78018	-0.512626	-0.845474		-1.1927		-0.845095		-0.807216		-0.984883	16	0
SLC38A5	-0.803835	-2.4135	-0.967995	-1.13702	-0.79491	-1.00821	0.586731	-1.13398	-0.877925			-1.67179	-0.625454	-0.865359		-0.776201	-0.953988			-1.8703		-0.599767	-0.736048	-0.335327			16	1
LOX	-0.802489	-1.05473	-0.432506	-1.58193		-1.24785	-1.94918		-0.742229	-1.48529	-1.42051	-1.38458	-1.31306	-0.576723	-0.919303	-0.664499	-1.56419					-0.798211		-1.47964	0.976444	-1.36203	16	1
CDT1	-0.799017		-1.56019	-0.64014	-0.990454	-1.07949			-0.258145	-1.00905	-0.48744	-1.4416	-1.58805	-0.379135	-0.411565	-1.18572		-0.753913	-0.931572	-1.03905		-1.18176	-0.872004		-1.21537	-1.0878	16	0
SEMA4B	-0.785203	-1.14202		-0.758734	-1.0321	-1.35441		-0.818367	-0.612427	-0.79922			-1.11546	-1.11771		-1.52642	-0.372749	-0.281277	-0.728718	-0.471266	-1.21307	-1.08079	-1.37243	-0.318329		-0.929791	16	0
KIF4A	-0.782975	-0.880993	-1.38183	-0.389202	-0.337735	-0.445089		-0.396756		-1.68904	-0.804295	-1.5543	-2.0231	-0.380117	-0.447931	-1.38349	-0.678105	-1.05629	-0.40578	-1.20696		-0.840838	-1.07165	-0.627149	-1.22849	-0.984429	16	0
CDCA2	-0.779001	-0.955544	-1.52908	-0.574858	-0.664286	-0.501226		-0.324081	-0.753475	-2.59544	-0.919748	-1.37043	-1.57244	-0.361739	-0.592786	-1.07882		-0.83932	-0.480465	-0.92946		-0.862433		-0.337077	-1.02813	-0.940526	16	0
SLC7A11	-0.773039	-3.08969	-0.570821	-0.699951	-0.448593	-1.93777	0.629213		0.398244	-2.56346		-0.88499	-0.561794	-1.04824		-1.10557	-2.12862			-0.990826	-2.30298	-0.916246	-1.89594	-0.898971	-1.57407	-0.611977	16	1
UBE2S	-0.752125		-1.34655	-0.825409	-0.748262	-1.1131	-0.537402	-0.416435		-0.481523	-0.75159	-1.39366	-1.68305	-0.541782	-0.797688	-0.928706		-0.649295	-1.15157	-1.17841		-1.08067			-1.25139	-0.987265	16	0
CLEC5A	-0.744449	-1.34636	-0.855158	-0.638376		-0.816	-1.17408		-0.34665		-1.57068	-2.08094	-0.855161		-0.581868			-0.597071	-1.02699	-2.53151		-1.26253		-0.735998	1.65746	-0.726247	16	1
OSMR	-0.725898	-1.55626	-0.399827	-1.0323		-0.567785	-1.03237	-0.768183	-0.705845	-0.991832	-1.16203	-1.23171	-0.752127	-0.952228	-0.641136	-0.473407	-1.44254	-0.299241		-0.97414				-0.832412	1.1228	-0.639029	16	1
CDCA4	-0.725748	-1.01674	-0.811535	-0.86388	-0.821143	-1.59282		-0.77847		-0.24403	-0.409061	-0.69616	-1.49218	-0.94359	-0.500479	-0.919316		-0.185848	-0.875109	-0.765764	-0.625142	-1.02143		-0.278708	-0.52252	-0.591203	16	0
SKA1	-0.717794		-1.48366	-0.736558	-0.801823	-0.617443		-0.242692		-1.22167	-0.89163	-1.53127	-1.91587	-0.420235	-0.352714	-1.21896		-0.665292	-0.677771	-1.29427		-0.852025		-0.361737	-0.974441	-0.823489	16	0
NCAPH	-0.705675	-0.661962	-1.30161	-0.353328	-0.577413	-0.853219		-0.370228		-1.0776	-0.63631	-1.30935	-1.79791	-0.370093	-0.340829	-1.11128	-0.6388	-0.94173	-0.485893	-1.08064	-0.770096	-0.9031	-0.322148	-0.476554	-1.09515	-0.95923	16	0
FOXD1	-0.698643	-2.30186	-1.33008		-1.4849	-1.10026		-0.951939	0.716715	-0.953371	-0.739111	-2.76888	-2.25043	-0.743229		-1.03602	-1.36196	-0.564713				-0.683777	-1.3759	0.989317		-2.08383	16	2
ANXA1	-0.695915	-1.95846	-0.680949	-0.659846	-0.905488	-1.43848			-0.270961		-1.12457	-0.555357	-1.1521	-0.371858	-0.404179	-1.40919	-1.35208		-0.959761			-1.97116	-1.05277	-0.837026	-1.37464	-0.853281	16	0
CALML3	-0.693818	-1.66577	-1.06656	-1.25514	-1.14258	-3.03611			0.648801	-5.90177	-1.52505	-2.24008	-3.42432	-0.667971		-1.78649					-3.41777	-6.00973		-2.11448	-0.861625		16	1
NMU	-0.693162	-1.31367	-2.1777	-0.609301	-0.717558			0.870694	-0.822981			-1.52327	-0.69381		-1.20389	-1.61832		-0.745097			-1.90227	-1.23776	-2.11498	-0.990781	-2.34787		16	1
GINS2	-0.68858		-0.900538	-0.453875	-0.648563	-1.1874		-0.34355	-0.328649	-0.949856	-0.635654	-0.626179	-1.78529	-0.487735	-0.541144	-1.10555		-0.553963	-0.64554	-0.859086	-0.587939	-1.27791	-1.04808		-1.1696	-1.16643	16	0
DIAPH3	-0.676384	-1.15902	-1.2398	-0.743342		-0.485297		-0.81374		-0.782906	-0.408306	0.627887	-1.48851	-0.254977	-0.503738	-1.19425	-0.766661	-0.829445		-1.0319		-0.720869	-1.05741	-0.781252	-0.962919	-1.137	16	1
IL1R2	-0.671109	-2.13606	-2.21017		-0.872008	-0.848695	-1.66356		-2.24231	-1.62077	-0.995799	-0.639007	-1.04705			-1.83362				-0.75421	-1.42632	-1.04707	1.24266	-1.61332		-0.433507	16	1
CEMIP	-0.659446	-1.18564	-1.16925	-1.11126			-0.748283		1.60144	-1.44749	-0.73351	-0.708994	-0.885709	-0.549692		-1.53354	-1.81396	-0.454329	-0.616053	-1.78441		-1.50326	-0.564035	-1.17214	-1.85288		16	1
GSG2	-0.657603	-0.595862	-1.19827	-0.320717	-0.715005	-0.47063		-0.28755	0.411324	-1.04517	-0.695707	-1.06917	-1.07932	-0.406952	-0.499555	-0.69453		-0.618612	-0.737538	-0.903785	-0.673619	-0.714457	-0.576854		-1.07603	-1.33834	16	0
CLSPN	-0.65211	-1.01976	-1.20236	-0.451416	-0.617302	-0.389842		-0.313286		-1.23675	-0.943354	-1.61937	-1.62554			-0.730781	-0.703951	-1.11386	-0.664247	-1.22515	-0.774405	-0.508285		-0.316565	-0.745622	-1.39118	16	0
HS3ST3A1	-0.645611	-1.4102	-0.410163	-0.882382	-0.391469	-2.26337	-1.61432		-0.940544		-0.963554	-1.87024	-1.11822	-0.802875		-1.7156	-1.14512	0.339428		-1.40474	-1.62677	-0.796316	-0.493429	-0.685837			16	0
RAD51	-0.637839		-1.28333	-0.455173	-0.805833	-0.797144		-0.372254		-1.22223	-0.777745	-1.23084	-1.72283	-0.458812	-0.479484	-1.31828	-0.538851	-0.660686	-0.647634	-0.775425	-0.672972	-0.830253		-0.435039	-1.32397	-1.1033	16	0
TAGLN2	-0.621296	-0.882267	-0.80175	-0.652098	-0.440985	-0.776981	-0.850094	-0.57297	-0.490402	-0.492498	-1.22856	-0.592822	-0.239574	-0.483351	-0.590427	-0.942389	-0.991164	-0.323827	-0.329171	-1.24762		-0.668448	-1.49212	-0.822392	-0.70523	-0.442037	16	0
TRIM16	-0.617017	-0.624642	-0.609225	-0.752814	-0.526574	-1.12744		-0.286716		-1.12527	0.128071	-0.995163	-0.679082	-1.11897		-0.989027	-0.644517	-0.18589		-0.601162	-1.04537		-1.95712	-0.314552	-0.815699	-0.785262	16	0
C16orf74	-0.611589			-1.57677	-1.37688	-2.97327		-0.910401	-0.75521	-1.06452	-0.581604	-1.4009	-1.55944	-1.089		-2.26685	-1.05173		-1.40978			-1.01898		1.05726	0.724117	-0.867813	16	2
MYC	-0.604911	-1.45052	-0.595452	-1.38887		-0.784855		-0.718613	-0.563889	-1.33887		-0.720315	-0.757405	-0.533964			-1.52686	-0.285618		-0.72041		-0.949063	-1.14847	-0.804353	-1.93087	-1.06723	16	0
PDZK1IP1	-0.592594	-1.65014	-1.26284		-0.765996				-0.59697		-1.22277	-1.44187	-0.703385	-0.545991	-1.1005	-0.657434	1.48875			-1.12606	-3.35226	-0.924472		-0.897598	-2.60566	-0.676629	16	1
PFKFB3	-0.587238	-1.1215		-1.27475	-0.627285			-0.762956	-0.717918	-1.35908	-0.309595	-1.44574	-0.300208	-0.686507	-0.445051	-0.644424	-2.09831		-0.393314	-0.941215	-0.885555	-0.622745	-1.33719	-0.91148		-0.52665	16	0
RHOV	-0.581422		-0.703828	-0.597091	-1.26988	-1.9131				-1.38316	-1.49928	-3.06471	-2.34854			-1.22406		-0.427982	-0.748949	1.31436	-2.54162	-2.27713	-0.609474	-1.18041	-1.87165	-0.575755	16	1
FAM83D		-0.58855	-1.82901	-0.662948	-0.466863	-0.514236				-2.23957	-1.09625	-0.792638	-1.80391	-0.303553	-0.596942	-1.07144		-0.680907	-0.494721	-0.809798	-1.05288	0.526662	-0.928411	-0.637525	-1.09304	-1.41852	16	0
CNFN		-1.69963	-0.65106	-1.34971	-0.910602	-1.82616					-0.710563	-1.11119	-0.772675	-0.856227	-0.802521				-0.678131		-3.98137	-4.75984	-1.08324		-1.35532	-0.897396	16	0
PTGES		-0.597052		-0.747655		-0.9138	-1.24694	-0.413906	0.95572		-0.739275	-2.13208	-1.2712	-0.70067	-0.730196	-1.34705	-1.29664				-1.59516		-0.687948	-0.892729	-2.36845	-0.684249	16	1
CSTA		-1.33588	-0.720232	-1.06096	0.631374	-1.40675	-0.782649	0.528006		-0.645416	-0.943029		-0.680441			-1.10581	-0.968817	-0.595554	1.12659	-1.07474	-2.70092	-4.00649	-1.04787	-0.688672			16	2
TNNT1		-1.82847		-0.886503	-1.70845	-2.78882		0.730884		-2.29399		-2.99562	-2.65284	-1.15243		-3.59704	-4.00184	1.96612	-1.74182	2.40294		-1.63197	-0.667077	-1.82888	-1.30775	-1.49227	16	3
F12		-1.61825	-0.856419	-0.891523	-1.02488	-1.30624	-1.25074	-0.551433		-1.09522	-0.544128	0.972715	-1.40761	-0.925179	-0.532992			-0.717462	-0.836439		-1.39983	-1.35937	-2.12609		-1.68608	-0.877354	16	1
PTHLH	-1.94508	-4.90002	0.73426	-2.42288	-0.604717	-4.5306		-1.86539		-3.28922	-1.05524	-2.64139	-2.35458	-2.71877	-0.535294	-1.7972	-4.69998				-1.3682		1.21225			-0.902456	15	2
SH2D5	-1.53108	-3.57494	-1.51244	-3.5188		-3.81741		-1.88235			-2.03078	-2.5497	-3.05111	-1.9587		-2.27405				-1.85227	-1.9519	-1.0758		-0.576562		-1.46571	15	0
MMP8	-1.4041	-0.879182	-0.783781							-1.11327		-1.40211	-1.09252	-0.583574	-1.82104	-2.09301	-3.28688		-1.82026	-5.69497	-2.24135	-2.88337		-1.17084		1.94774	15	1
SLC18A3	-1.18683	-3.91692	-4.96866	-1.61144		-3.81432				-1.50811	-4.37301	-4.64483	-2.99417		-1.24486		-1.93037	-2.1055		2.02387		1.48345	0.918884	-1.00764	-8.09522	-2.61026	15	3
MMP10	-1.13953	-2.51527	-0.523698		-0.787288	-3.38163		-1.58381		-7.21719	-2.56375		-2.34768	-1.08349			-3.29071	-0.676286		-1.40111	-3.58789	-0.875143	1.78624	-2.23723	3.70422		15	2
GAL	-1.09691	-2.59279	-2.50537	-1.89158	-1.19261		-1.19879		2.20348		-2.25431	-2.52886	-4.22507					-0.554818	-1.50515			-1.0329	-6.22699	-0.70215	-2.76424	-1.18195	15	1
TGFBI	-1.07521	-2.5214	-1.50162	-2.08744		-2.51809	-1.21898	-1.68963	-0.966944	-0.889803	-1.0666		-2.11508	-1.22524	-0.541561	-1.60718	-1.95355	-0.291809		-1.46707		-0.505299					15	0
KLK5	-1.0564	-5.54455	-1.83677		-2.54211	-2.29088			1.4981		-2.02894		-3.11355	-1.51705					-3.61037	-3.10408	-3.2505	-6.46691	-1.66449	-2.32053		-1.22117	15	1
VSNL1	-1.03734	-3.28235	-1.045	-1.31495	-0.543082	-2.33879	1.48646	-0.278798		0.971746	-2.23395		-0.842664	-0.650836	0.486321	-0.824957				-1.18429	-1.90938	-1.73877	-3.12875	-0.598236		-1.12168	15	2
NTSR1	-1.01845	-5.37718	-1.38629	-1.56209	-0.978332	1.45093	-2.61503	-1.54953	-0.656736		-2.12838		-4.08732		1.74464	-1.25096	3.40682		-1.43938	-1.79159	-2.81755		-0.848497			0.757385	15	4
LY6D	-0.993333	-1.58595	-5.0662		-2.37907	-2.54904		-0.575003	1.0462	-3.5408	-1.63432	1.71361		-1.12341		-2.97331	2.36702		-5.78226	-3.09232	-3.21686	-3.01394			-9.14082	-0.806357	15	3
STEAP1B	-0.970555	-3.22223	-1.49812	-1.59352		-2.14022			0.680511	-2.4924	-0.582194	-2.56438	-1.97106	-0.886876		-0.737342	-1.7156			-1.79832			-0.567644		-0.622024	-1.10074	15	1
CCL8	-0.937321	-1.55917	-1.57269	-1.29017	-1.21999	-1.15105				-0.644022	-1.83616	-0.665647	-1.54804		-0.699537		-1.92279					-1.79099	-1.33237			-1.20647	15	0
KYNU	-0.927467	-1.59532	-1.20022	-0.827037	-0.49366	-1.29467	-0.637764	-0.795582		-0.994589	-0.747137	-0.544628	-1.83798		-0.712292	-0.700121	-1.17751			-1.60509		-0.545021	0.719419		-2.65673		15	1
PLEK2	-0.923483	-1.78921	-0.791206	-0.889127	-0.911556	-1.11171	-0.985923	-1.45602	0.785256		-1.44071		-1.51291	-1.45774	-0.335584	-1.56416		0.262446	-0.609507	-1.91938		-1.17314		0.236396		-0.331338	15	1
C2CD4A	-0.892391	-0.933825	-1.74388	1.11105	-0.87833	1.58557				-2.22364	-2.30689	-1.67003	-1.01638	-0.814876			-2.194	-0.949119		2.09991	-2.49375	-0.824968		-1.32665		-0.997641	15	3
APOBEC3A	-0.853151	-1.80588	-1.32009	-1.5061	-0.616918	-2.27671					-0.879005	-0.744739	-0.435483	-1.01834			-1.09249			-0.810574		-1.41578	-1.08234		-1.85114	-0.620824	15	0
SLC16A1	-0.830058	-2.52168	-1.08536	-1.71787	-0.234721	-1.05162	-0.460724	-1.25857	-0.761937	-1.71059	-0.293353		-1.87721	-1.24529		-0.906268	-0.841382	-0.369654		-0.697713		-0.404725	-1.47118	-0.615954		-0.48646	15	0
RAET1L	-0.824197	-2.20404	-2.77969	-1.69235	-1.43626	-1.46942			0.739371	0.971315			-1.39153	-0.549444	-1.29049	-1.79702			-1.48298	-1.16762		-2.03032	-4.62281	-1.78678		-1.75381	15	2
DEPDC1	-0.82301	-0.948209	-1.49616	-0.53166	-0.534653	-0.495064		-0.501481	-0.404367	-1.46575	-1.08527	-1.21412	-1.97436	-0.554183	-0.625087	-1.3499	-0.716382	-0.570565	-0.553762	-1.19966		-0.807027	-1.09303	-0.446953	-0.885567	-0.970726	15	0
RAET1G	-0.809674	-0.601681	-0.701475	-2.14664	-0.89051	-2.1764		-0.617515		-1.29884		-0.833329	-1.58223	-0.688423							-2.04414	-1.25418	-0.621632	-0.645983			15	0
ITGB4	-0.808795	-1.21083	-0.660026	-1.0451	-0.454015	-1.18708		-1.13034			-0.604025	-1.53022	-0.597772	-0.958921		-1.26096	-0.829085			1.03174		-0.751037		-1.05695		-0.582667	15	1
PKP3	-0.778088	-1.41557	-0.744902	-1.04786	-0.520858	-1.26809		-0.690533	-1.21605		-1.06352	-2.68608	-0.567132	-0.760467		-1.22416		-0.394779	-0.425398		-3.08326	-0.994564	-2.19266	-0.366077		-0.719793	15	0
CDC6	-0.773052		-1.36366	-0.333603	-0.550222			-0.258168		-1.27488	-0.840584	-1.1594	-1.89338	-0.413303	-0.539728	-1.33494	-0.467672	-0.832331	-0.640441	-0.916248	-0.6391	-1.42041	-1.49507		-1.11395	-0.918002	15	0
MMP9	-0.768279	-3.1171	-2.5719	-1.3307		-1.08128	-1.44259		0.734368		-3.6538	-1.87036	-0.818781	-0.448617	-1.204	-0.912727	-4.36328				-1.52435	-0.597745	0.740909	-0.717452			15	2
ITGA5	-0.766053	-0.627377	-0.547019	-2.00759		-1.0299	-1.28161	-1.48995	-0.356555	-1.14163	-1.40447	-0.546237	-1.58917	-0.956503	-0.526964	-0.984821	-2.08775			-1.36316	-0.970856	0.397362	-0.775929			-0.363171	15	0
NCAPG	-0.758801	-1.08529	-1.33885	-0.571675	-0.512279	-0.740861		-0.606823		-1.46571	-0.743184	-1.40166	-2.04734	-0.29266	-0.53536	-1.31787		-0.999999	-0.487565	-0.925463		-0.981184		-0.402333	-0.932727	-0.9922	15	0
IL6	-0.755495			-1.18092	-0.807707		-1.84421	-0.872672	-0.854754	-3.32417	-2.72024	-0.925236	-0.574142		-0.760532		-2.84285			-1.52347		-1.03284		-0.816932	1.61179	-1.35248	15	1
DSC2	-0.750884	-2.55559	-1.29121	-1.09373	-0.342137	-2.01591	-0.750527		-0.301893	0.373438	-0.36589	-0.835506	-1.01207	-0.596394		-0.658823	-0.937056				-2.60626	-1.17618		-1.12178		-1.16575	15	0
LY6E	-0.741942	-1.2444	-1.41404		-1.19785	-0.534636		-0.732691	-0.766162	-0.511754	-0.895148			-0.459242	-0.474517	-1.38282		-0.232227	-0.635043		-0.788244	-1.23605	-1.11506	-0.972397	-0.835597	-0.939314	15	0
INHBA	-0.734078	-1.55953	-0.404939	-0.848173	0.437744	-1.70949	-0.947746	-1.54035		-1.50908	-1.29581	0.631719	-0.994356	-0.607329	-0.779062	-0.969484	-2.23503	-0.62191				-0.57368		-1.54955			15	1
FOXC2	-0.731945	-2.38582	-1.12731		1.17911	-1.88818		-0.979399		-1.48856	-0.979862	-1.4043	-1.23058	-0.77881	-0.658567	-1.88584	-2.11163	-0.357406					-1.14863		1.19932	-1.38991	15	2
CENPA	-0.73112	-0.816282	-1.70696	-0.426562	-0.476893	-1.00779		-0.365603		-1.41933	-0.985219	-1.47634	-2.18346	-0.463902	-0.618519	-1.32682		-0.866018	-0.416475	-1.05053		-0.809486		-0.47475	-1.10194	-0.731641	15	0
PYGL	-0.728387	-1.01531	-0.353393	-1.36887	-0.54088	-2.37676	-1.00288	-1.20278	-0.686683	-0.451921	-0.823966	0.715368	-1.35914	-1.44745	-0.456346	-1.05864	-0.938424			-1.18993		-0.713403		-0.49855	1.06901	-0.721573	15	2
FPR2	-0.721987	-1.32477	-1.44503	-0.964164		0.847393	-1.82115	-0.655596			-1.03593	-1.361	-0.853526		-0.955733		-1.70053		-1.84579	-1.49889		-0.934832		-1.50939			15	1
TEAD4	-0.704262	-1.45679	-1.0679	-0.588333	-0.495543	-0.710637	-0.601276	-0.34118		-0.212729	-1.15415	-1.03557	-0.979356	-0.505999			-1.81827	-0.528783	-0.481853	-0.712388	-0.520584	-0.831044	-1.5849	0.313865	-1.36307	-0.692494	15	0
PRR11	-0.70228	-0.92546	-0.719405	-0.742327	-0.184727	-0.635558		-0.80923		-1.21064	-0.449967	-1.50793	-1.9796	-0.522836	-0.340811	-1.07793	-0.557114	-0.763365	-0.364795	-1.27034		-0.467209	-1.03576		-0.953321	-1.02295	15	0
TPX2	-0.702181	-0.782233	-1.48334	-0.342307		-0.467505		-0.497242		-1.65666	-0.841079	-1.23286	-2.16424	-0.508847	-0.3207	-1.53726		-0.91591		-1.18542	-0.62283	-0.699147	-0.618558	-0.535282	-1.0808	-0.948281	15	0
C5orf46	-0.700983		-2.04163	2.42764		-2.22732	-3.38286			-3.33949		-0.951847			-1.62951	-1.32392	-3.05544			-2.82879		-2.04079	-2.5204	-1.05188	-2.16661	-1.09797	15	1
CCL26	-0.694031	-0.713494	-1.08701	-1.18214	-1.5262	-1.53479	-1.59856	0.693467		-0.936504	-0.394865	-1.89458	-1.96033	-1.32519			-1.25718		1.06382	-2.00764		1.0245	-1.85896			-2.43975	15	3
KIFC1	-0.689112	-0.737132	-1.19818	-0.332496	-0.606488	-0.385195		-0.271143		-1.38894	-0.652604	-1.13257	-1.71327	-0.219681	-0.33572	-1.19158	-0.586639	-0.679619	-0.466153	-1.03088	-0.557553	-0.863755	-0.395679	-0.35086	-1.06167	-1.01516	15	0
EIF4EBP1	-0.688091	-0.589264	-1.25907	-0.566007	-0.745392	-1.41418	-0.56194	-0.665948	-0.420068	-0.805238		-0.557574	-1.08614	-0.952738	-0.425823		-0.98695		-0.580214	-1.13841		-0.765319	-0.806358	-0.425004	-1.12445	-0.346936	15	0
TNFAIP6	-0.670014	-0.920077	-0.171951			-0.821867	-0.955059	0.412879	-0.94938		-1.41165	-3.14276	-1.47806	-0.397568	-1.05328	-0.945714	-2.97614	-0.645307				-1.2318	-1.19777	-0.7217			15	0
CCT5	-0.669886	-0.841665	-0.960759	-0.698215	-0.333237	-0.883821	-0.251305	-0.637168	-0.289895	-0.773962	-0.163441	-0.816594	-1.06809	-0.709706	-0.478998	-0.544184	-0.26828	-0.460424	-0.385229	-0.708426		-0.744999	-0.634809	-0.216934	-0.693308	-0.817283	15	0
TRIM29	-0.661301	-0.88998	-1.26974	-0.930836	-0.627176	-1.77095	1.03151		-0.782743	-1.23819			-1.49504	-0.474128	-0.637883	-2.13081			-0.731629			-2.20517		-0.907509		-1.12428	15	1
AIM1L	-0.657412		-0.772931	-0.93728	-0.551399	-1.04052		-0.359056		-1.27779		-0.95835	-1.31027	-0.709964		-1.98624					-3.19218	-1.40827	-1.84325	-1.19904	-1.80123	-0.965071	15	0
RAD54L	-0.650652		-1.4063	-0.396423	-0.550348	-0.592331			0.734284	-0.532968	-0.598699	-1.34897	-1.66054		-0.382519	-1.38877		-1.02272	-0.64879	-1.18495	-0.635907	-0.989298	-0.807547		-1.18823	-1.04109	15	1
RGS20	-0.647805	-2.99234	-1.52196	-1.85948		-3.04269		-1.36635		-0.726758	-0.582315	-1.6956	-2.38758	-1.76949	0.845559	-1.7559			-1.67086		1.24529	-1.46517	1.17559		1.41289	-0.702873	15	4
CHST2	-0.646236	-1.13886	-0.728058	-0.957205		-2.18846	-0.904743	-0.710575		-1.13155	-1.04598	-1.05879					-1.16955	0.318853			-1.27306			-1.01725	-0.756569	-1.09603	15	0
PPP2R2C	-0.644867	-2.53043	-0.631548	-1.07671	1.01637	-2.48803	1.16168	-0.719631		-2.61141	-0.826065	-1.51002	-1.68436	-1.04155			0.385111	-0.438645		2.37011	-2.78797	-1.28084	-1.25414	-1.96051			15	3
TMEM40	-0.64414		-1.59372	-1.03885	-0.828443	-2.03623		-0.362803	2.26715	-3.82333		-1.23914	-0.974558	-1.02049		-3.19296			-1.89246		-2.82167	-3.51848		-1.43555	-2.03039		15	1
HN1	-0.643697		-1.30798	-0.665109	-0.585205	-0.605395		-0.636095			-0.188904	-1.17261	-0.775452	-0.554999	-0.793804	-0.936413		-0.649732	-0.444853	-0.809632		-0.535977	-1.21336	-0.415022	-1.00672	-0.608906	15	0
PGD	-0.641609	-0.663187	-0.813632	-0.651086	-0.507872	-1.25805				-0.717872	-0.336225	-0.982021	-0.603567	-0.980738	-0.376515	-0.259169	-0.337724	-0.499048	-0.527625	-0.885212	-1.00074	-0.839938	-1.09916		-0.742283	-0.708137	15	0
GTSE1	-0.629528	-0.586003	-1.36027		-0.486597	-0.46791		-0.373457		-1.22357	-0.688636	-1.23776	-1.73491	-0.279159	-0.501079	-1.08398	-0.611397	-0.884505	-0.411219	-0.902262	-0.85631	-0.874106		-0.44872	-0.886137	-0.922642	15	0
MCM2	-0.62395		-1.18252	-0.470225	-0.831336	-1.15713			-0.506126	-0.822896	-0.347696	-1.02247	-1.36595		-0.240498	-1.12185		-0.370765	-0.693221	-0.760041	-0.664519	-0.980277	-0.723976	-0.372164	-1.21562	-1.23821	15	0
CCRN4L	-0.61872	-0.842818	-0.365417	-1.20816	-0.6649	-0.769516	-0.952568	-0.96404	-0.31309	-1.13565	-0.423336		-0.813861	-0.502033	-0.548777	-0.349471	-0.993137	-0.396232	-0.576105	-0.785101	-0.800528	-0.551562	-1.54929		-0.799229	-0.847404	15	0
RAN	-0.609583	-0.875875	-0.653736	-0.649084	-0.616031	-0.778818	-0.199024	-0.621951	-0.355353	-0.678811	-0.284065	-0.788495	-1.06142	-0.489278	-0.384929	-0.373056	-0.246931	-0.436105	-0.551297	-0.723634	-0.350358	-0.783657	-0.783421	-0.273464	-0.94252	-0.791196	15	0
LYPD3	-0.608734	-0.970879	-0.468599	-0.67558	-1.40962	-2.2828			0.515554	-2.91111	-0.597614		-2.6514	-0.508766		-1.9646					-3.35771	-3.63069	-1.6783	-0.782329	-2.24587	-1.81653	15	0
NME2	-0.598327		-1.08805	-0.847268	-0.379827	-1.10491		-0.636521	-0.268192	-0.606462	-0.387134	-0.645799	-0.911092	-0.435105		-0.898939	-0.62246	-0.512198		-1.11045		-1.28153	-1.29225	-0.211879	-0.920763	-0.940058	15	0
BOP1	-0.593211	-0.723654	-1.3006	-0.727854	-0.608451	-0.953794		-0.746833		-0.286294		-0.918597	-0.83163	-0.546711	-0.355702	-0.526278		-0.388854	-0.671818	-0.829283		-0.896829	-0.677861	0.212865	-1.05592	-0.583526	15	0
IL36RN		-2.38272	-2.55516	-2.08444	-1.97277	-3.21755							-2.11202	-1.17167		-2.97079		-1.07871		-3.52294	-2.44425	-5.24125	-1.93772	-1.00034		-1.85706	15	0
DHCR7			-1.22342	-0.648645	-0.786826	-1.46764		-0.75988	0.431888	-0.469075			-0.654194	-0.641698	-0.586598	-0.698295		-0.551704	-0.679823	-0.531838	-1.28315	-0.825433	-0.925544	-0.306555	-0.630368	-0.679453	15	0
ERRFI1		-0.885642	-0.25178	-1.04968	-0.650493		-1.37495	-1.0263		-0.613332	-0.595728	0.677538	-1.31165	-0.566192	-0.63214	-0.6619	-1.55578		-0.603829	-1.30803	-1.07588	-0.280923	-2.98467		2.0456	-0.360854	15	2
LDLR		-1.27726	-0.629327	-0.865916	-0.592965		-0.689866	-0.597796	0.959146	-0.987846				-0.833124	-0.443394	-0.746223		-0.548923	-0.384196	-0.665357	-1.19167	-0.617501	-2.16511	-1.35113		-0.896414	15	1
IVL		-0.91426	-3.45236	-1.032	-3.19338	-2.33211				-4.61812	0.589491			-0.675392	-3.00793				-3.42751	-1.8681	-3.02561	-6.81066		-2.11654	-3.35624	-2.24653	15	1
APOBEC3B			-1.80984		-0.434952	-0.645491	-0.634308			-0.850525	-0.643379	-0.854015	-1.41231	-0.549652		-0.730297	-0.837577	-0.812781	-0.52356	-0.81402	-0.829312	-0.697185		-0.355635	-1.48186	-0.979079	15	0
MMP11		-0.718887	-0.938021	0.674341		-1.37183	-0.87014	0.505388		0.511978	-1.21287	-1.05013	-1.95856		-1.33819	-1.72682	-2.17353	-1.60864			-1.94809	-1.21603		-0.917536	-0.825688	0.426347	15	1
SPRR2D		-5.03159	-5.93463	-2.15515	-4.23432	-1.78902							-2.59245	-0.725162		-1.42666			-2.38293	-1.45006	-3.87006	-7.47078	-2.97194	-2.28311		-2.73736	15	0
CTHRC1		-0.743171	-0.466846			-0.655031				-1.32951	-2.13326	-1.25302	-1.49487		-0.865859	-0.767022	-1.93372	-1.14808			-0.98184	-0.69779	-0.966168	-1.26076		-0.724762	15	0
BCL2A1		-0.749482	-1.55397	-0.629154	-0.660612		-1.04658			-0.595348	-0.747688	-1.08565	-0.756381		-1.1721		-1.24834		-1.15961	-1.75359		-0.619963	0.969315	-0.468304	-1.98914		15	1
PNCK				-1.88549		-2.55781				-3.04779	-0.702792	-2.84245	-2.07937	-0.868247		-3.18976	-1.92425		-0.955921	-1.59512		1.59601	-1.55555	-0.693404	-1.78033	-0.604807	15	1
PTPRN			-1.22564			1.40736		-0.793612	-1.94944	-2.03466	-0.874839	-2.70109	-4.10077		-1.51307	2.44191	-0.72176	-0.447623		-2.87473	-1.55593	1.43654	-1.86858	-1.72023	-1.30626	-1.89493	15	3
PAEP		-5.12225	-2.4767	4.12239	-6.96941		-5.16865	-1.47045	-1.44704	3.82247			-0.971804	-2.45393	-1.33387	-2.28592	-3.25398	1.48973	-1.82719	-3.08478		-2.11853	-2.77014				15	3
CASP14	-2.31291	-3.3737	-4.19088	-1.67095		-2.63662		-1.04558	-7.46296	-8.78271		-2.46914	-7.23779			-6.90908	-3.74863						-4.60818			-1.92345	14	0
KRT81	-1.89264	-2.32578	-2.668	-1.7185	-1.68473	4.37711		-2.27911	-0.67695	0.738685	-0.810216	-1.37551	-3.54845	2.22908		-2.55467	1.18996			-1.23056		-2.30252		0.462011	0.733148	-1.56232	14	5
FGF5	-1.68665	-3.65972	-2.25188	-3.86548		-1.63995		-2.24556		-2.34166		-4.60629	-6.19775	-1.03997	-0.954505		-2.34302			-2.40563	1.95502	0.781264				-1.78046	14	2
IGFL3	-1.47399	-3.06504	-1.40576	-1.85307	-0.875296	-3.43246							-1.20799	-2.40204	-2.59472	-2.51558				-3.63703		-1.58692		-2.21666		-2.83399	14	0
TM4SF19	-1.25345	-3.77698	-0.646654	-1.8205		-3.20875		-0.871398	0.569475	-0.78241		-2.67842	-1.31181	-1.18054	-0.446142	-1.08406	-1.71594			-1.85517			-1.21902				14	0
CCK	-1.13326		-2.7798	-1.08719	-3.05691	1.70644	1.22374	-0.898011		-2.17672	-2.10211	-5.13469	1.04613		-1.01104	-1.56337	-3.22279	0.688682		1.87895		-0.806671	-1.79963			-1.79743	14	5
FAT2	-1.05743	-2.35234	-0.447728	-1.23631		-2.64597		-0.623278	1.29803	-1.83738	1.38792	-0.832581	-1.36473	-0.955298		-2.77009		0.649801	0.760181	-1.87653		-3.5462		-0.727279		-1.90631	14	4
LY6K	-1.02889	-0.826625	-1.97896	-0.612591		-2.48148		-0.92501	1.796		-0.256658	-1.45775	-2.11789	-1.21708			-1.60705			-1.69283	-1.98855		-2.79435			-0.803145	14	1
S100A7	-0.98989	-4.43005	-1.75506	-1.27149	-4.63448	-3.25604				-7.7439	-0.771922	-1.15135	-5.16241		-1.14178							-4.57329	-3.28759	-2.02053			14	0
IL1B	-0.987028	-0.744809	-0.286199	-2.34375	-0.558774		-0.791545	-1.27395			-0.613062	-1.31122	-0.902875	-1.5295	-0.445374				-1.82169	-3.63801	-1.47281	-0.794174			0.76293	-0.694978	14	1
COL7A1	-0.977937	-1.77438	-0.582668	-1.40296	-0.400788	-2.42141		-0.777795		-1.70363	0.61542		-1.64203	-0.839197		-1.99173	1.37085	0.596704		-0.741303		-0.776012	-2.8978	-0.814701			14	3
CDA	-0.964306	-2.80007	-0.317509		-0.782772	-1.35887		-0.847163			-0.554167		-2.50406	-0.951684		-2.38297	-1.34328		-0.745244	-0.856344	-3.18119	-2.06922	-0.707834				14	0
AHNAK2	-0.958067	-2.82854	-0.785627	-1.19228		-2.44884	-0.931472	-1.0111			-1.64525	-2.07438	-1.38328	-1.22075		-1.79522								-0.951618		-1.28263	14	0
PLIN2	-0.956829		-0.950812	-0.52731			-1.64172	-0.382735	-1.07882	-1.89592	-0.650775		-1.31839	-0.312179	-0.955223		-1.00159		-0.597963	-0.743825	-1.23323	-0.389254	-1.42726	-0.481424		-1.12832	14	0
ACTBL2	-0.927656	-2.62367	-1.20275		-1.42271			-0.825668	1.03645	-1.41166		-1.53608	-0.990416		-0.759824	-1.42506	-2.48749			-2.03884				-1.35088		-1.18487	14	1
TNS4	-0.900714	-0.832026		-1.06066	-0.825411	-0.950945		-1.10485	2.08045	-2.04748		-1.91452	-2.12915	-0.743646		-1.732					-2.29691	-1.34825	-1.42083				14	1
CXCL1	-0.879019	-1.82453	-2.37971	-0.759113	-0.861208		-1.18134	-0.813958			-1.99948	-2.22722		-1.02193	-1.38674	0.71717				-3.10951		-1.30332		-1.38755	3.6111		14	2
IL1RAP	-0.842878	-2.09426	-0.574304	-1.2983		-1.76855	-1.15274	-1.07267	-0.36334	-1.32065	-0.581534		-0.794352	-0.996736		-1.08619	-1.10716					-0.466626	-0.457638	-1.19225	1.14492	-0.742766	14	1
WARS	-0.825212	-2.22599	-1.05721	-0.99932	-1.14627	-0.612859		-0.986335		-0.735241	-0.838388	-0.758632	-0.784844		-0.47748	-0.431178		-0.320157	-0.403076	-0.557817		-1.27384	-0.938406	-0.48297		-0.865969	14	0
NEIL3	-0.809294	-1.51689	-1.19294	-0.659756	-0.355754	-0.979787		-0.654637		-1.91078	-0.569802	-1.70881	-1.84496	-0.559628	-0.579113	-1.16782		-0.902463	-0.389982	-0.6507		-0.846176		-0.510287		-0.846561	14	0
NKX2-8	-0.806507	-1.02504	-0.870851			-2.21452	1.371	-1.00421		-1.64441	0.605134	-2.61095	-0.729389	-0.627574	-1.03303	-2.41941			-1.99093				-1.60694	-0.508179		-1.33588	14	2
F3	-0.805413	-2.74086	0.290465	-0.959657	-0.83441			-1.54388		-0.723701	-1.20338	-0.811022	-0.426858	-0.926033		-1.11614	-0.799533			-1.05719	-1.54229	-0.405237	-1.17723		2.04213		14	1
FIBCD1	-0.80405	-1.25928	-1.3736	1.05687	-0.919324		-0.811229		-0.783078	-4.45975		-3.13443	-1.37904	-1.31098			2.92989	-1.2606					-1.22871	-1.48809	2.27004	-0.765495	14	3
CYP24A1	-0.794571			-1.00911	-0.798068		3.47198			-1.63358	0.330737	-4.20153	-1.47087	-0.735339	-0.873662	-1.52983					-2.88199	-1.32123	-1.61858	-0.959016	2.41308	-1.41611	14	2
HCAR3	-0.786058	-0.590089	0.330382	-2.21703	-1.35941	-1.21675	-1.20062			-0.877811		-1.651	-0.681666	-0.70134	-0.579192	-1.53422			-2.24101		-2.22735	-2.55137	0.611747			-0.535464	14	1
GPR115	-0.765641		-2.48336	-1.28549		-0.896254		-0.556731		-1.65543		-2.92279	-2.01414	-0.727951	-0.799355	-1.24056		-0.559286				-0.86485		-1.97445	-2.32348	-1.05301	14	0
SMIM3	-0.735525	-0.719637	-0.14594	-1.08656	-0.472577	-0.693178	-1.42775	-0.912319	-0.683324	-0.501523	-1.03125	-0.819762	-0.738044	-0.274024	-0.387921	-0.389675	-3.5743		-0.49138	-0.790051		-0.349335	-0.791698	-0.674801		-0.457788	14	0
STC1	-0.729096					-0.855929	-1.27401	-1.38379	-0.460373	-2.25834	-3.07129	-0.620696	-2.58854	-0.954319	-1.31755	-0.543104	-2.94547			-0.837244		-0.439145	-1.55555			-1.24137	14	0
CKS1B	-0.713133	-0.636963	-1.04679	-0.693574	-0.504324	-0.841515		-0.535661	-0.535515	-0.805294	-0.331648	-0.46553	-1.47762	-0.581072	-0.447547	-1.01711	-0.469767	-0.525368	-0.414797	-0.785179		-0.659008	-1.19417	-0.465645	-1.30908	-1.10452	14	0
SLC2A5	-0.712679		-1.27572		-1.03351		-0.615222	0.939874	-0.826232	-1.44612			-1.15903		-1.05975	-0.906908		0.862721	-0.842114	-1.23317		-0.635219			-1.66954	-0.821033	14	2
DUSP5	-0.709183						-1.2652	-0.585533		-1.64601	-2.07087	-0.993167	-0.761831	-0.388148	-0.565461	-1.03149	-1.04454			-0.987981		-0.364338	-1.73644	-1.43742	-1.05881	-0.934934	14	0
CDKN2A	-0.705848	-1.25674	-1.91409	-0.628016	-1.0307							-0.769727	-1.66325	-0.690064	-0.666922	-1.77089		-0.56584	-1.44839					-1.05093	-1.30295	-0.662718	14	0
TGM5	-0.70565	-0.812608	-1.52631			-1.65751	1.43631			-3.48455	-0.524281		-2.21754	-0.705204	-1.04055	-2.14742	-4.46485	-0.554615		1.83782	-2.58738	-2.84103			-2.9909	-1.58914	14	2
RIN1	-0.702296	-1.09598	-0.420084	-1.22574	-0.479965	-1.19567	-0.675018	-0.928844			-1.23995	-0.982355	-0.564163	-1.08538		-0.500479				-1.43673		-0.840985	-0.925877	-0.682992	-0.938888	-0.290801	14	0
COL11A1	-0.696522	-1.08469	-0.886867			-2.94124				-2.17986			-2.70839		-1.12446	-1.70925	-1.28673	-1.689			-2.32798	-2.2771		-1.86467	2.51757	-1.393	14	1
HMGA2	-0.695999	-3.3084	-0.725314	-1.32233		-0.972401	2.3314	-1.46127		-0.907916	-4.54086	-2.24521	-3.18287	-0.811841	1.45516	-2.39094	1.25339		-1.10377				-1.4153				14	3
RPL39L	-0.692989	-1.04238	-1.0235	-0.461617	-0.757378	-1.39179					-1.29309		-1.84286	-0.593918	-0.698733	-1.27738	-0.72112						-0.822136	-0.57536	-1.6284	-0.740388	14	0
SHMT2	-0.690198	-0.66784	-0.978586	-0.572878	-0.821559	-0.681397	-0.409902	-0.514861	-0.701165	-1.04182		-0.244319	-0.907182	-0.516093	-0.52073	-0.525211	-1.32159	-0.480443	-0.605442			-1.10872	-1.49396	-0.564773	-1.02209	-0.977798	14	0
KIAA1549L	-0.683835		-1.15429	-1.04876	-1.453	-2.2589			0.91086		-0.452955	-1.76696	-2.17217	-1.02332						-1.19221	-0.732648	-0.877789	1.62125	-1.58831	-2.87588	-1.78654	14	2
TYMS	-0.682344	-0.678935	-1.17987		-1.05468	-0.573455			-0.551716	-0.573175	-0.474814	-1.01	-1.3186	-0.296584	-0.349531	-0.773714	-0.599602	-0.548165	-0.730424	-0.758332		-0.92227	-1.33682		-1.33141	-1.35805	14	0
OIP5	-0.678942		-1.1185	-0.371517	-0.778036	-0.580252				-1.16069	-0.541756	-0.925781	-1.74388	-0.485733	-0.455843	-1.36181		-0.766224	-0.721719	-0.966362		-0.828206	-0.481455		-1.08992	-1.12062	14	0
APOL1	-0.677035	-0.777752	-0.450888	-1.29995	-1.12254			-0.610419	-0.665117		-1.23178		-0.703467	-0.808424	-0.702944	-1.41993	-1.02269		-0.643217			-0.769628		-0.268638		-0.44251	14	0
EXO1	-0.674749	-0.763622	-1.33765	-0.340882	-0.550591	-0.722444				-1.53687	-0.668533	-1.04015	-1.91292	-0.227933	-0.441376	-1.05988		-1.04851	-0.48333	-0.779937		-0.845227		-0.304637	-1.0694	-0.829388	14	0
CENPN	-0.669222	-0.861755	-1.32012	-0.739705	-0.493717	-0.663647		-0.491586		-0.967939	-0.427714	-0.559238	-1.38834	-0.719214	-0.517058	-0.751989		-0.47349	-0.405304	-1.05203		-0.658564	-0.730385	-0.267497	-0.953965	-0.861056	14	0
CDK1	-0.66317	-0.809015	-1.12731	-0.417424	-0.378554	-0.590534	-0.548773	-0.243462		-1.49661	-0.578546	-1.25084	-1.66497	-0.491659	-0.501035	-1.18303	-0.470408	-0.915828	-0.388071	-0.834108		-0.770729	-0.976474		-0.877611	-0.586927	14	0
KIF23	-0.662802	-0.841702	-1.142	-0.552502	-0.445669	-0.584221		-0.473804	0.35692	-0.451775	-1.0163	-1.34445	-1.80562	-0.369083	-0.392533	-1.27765	-0.527576	-0.734126	-0.425405	-0.685296		-0.781145	-0.578146	-0.609489	-0.745594	-0.899309	14	0
ISG15	-0.657647	-0.940485	-1.35133	-0.970677	-1.05767	-1.17903	0.944815			-0.419685	-1.778		-0.705959	-0.458149	-0.609482	-1.78673						-0.997952		-0.617483	-1.02626	-0.610874	14	1
MCM4	-0.653391	-0.65454	-1.14971	-0.378311	-0.653584	-0.983936		-0.272126	-0.283144	-0.829		-1.04942	-1.38904	-0.353609	-0.250491	-0.951746		-0.552349	-0.386698	-0.819756		-0.959011	-0.916485	-0.407656	-0.717576	-1.08461	14	0
CENPM	-0.651191		-1.15856		-1.31887	-0.668703				-1.04168	-0.481787	-1.47336	-1.44022	-0.403629	-0.591253	-1.21211		-0.700285	-0.986248	-1.04369		-1.1643	-0.525146		-1.43987	-0.554801	14	0
CENPW	-0.641102	-1.13503	-1.58622		-0.496786	-1.18631		-0.227317		-0.520747	-0.586583	-0.906672	-1.8977	-0.670191	-0.616365	-0.998871		-0.34418		-0.532906		-0.655576	-0.638744	-0.299824	-0.957418	-0.636459	14	0
E2F7	-0.637902	-1.18018	-0.866833	-0.619182	-0.502893	-0.820943				-1.39364	-0.434338	-0.945742	-1.60919	-0.533908		-1.73895	-0.979716	-1.01259	-0.563848	-1.25462		-0.961708	-0.749489			-0.557589	14	0
BAK1	-0.623854	-0.97154	-0.614891	-0.773368	-0.646051	-0.380747	-0.352739	-0.711836	-0.169755	-0.450777	-0.253455	-0.950266	-0.496422	-0.638008	-0.36582	-0.809278	-0.407218	-0.340134	-0.318376	-0.617257	-0.436699	-0.921778	-0.916023		-0.63825	-0.702281	14	0
CDCA3	-0.622194		-1.28795	-0.427531	-0.633697	-0.866973		-0.289179	0.319225	-0.403749		-1.2571	-1.74522	-0.344884	-0.472797	-1.13804	0.481673	-0.604912	-0.707808	-0.69011	-0.537699	-0.826397	-0.714207	0.188074	-0.931484	-0.656292	14	0
PLP2	-0.619795	-1.023	-0.748858	-0.757922	-0.347448	-1.37093	-1.21394	-0.384856		-0.457593	-1.11487	-1.16697	-0.834891	-0.858224		-0.84162			-0.423398	-0.739888		-0.553161		-0.624873		-0.608735	14	0
NEK2	-0.593728	-0.634359	-0.955143		-0.283269	-0.442682		-0.329139		-1.46956	-0.913134	-1.12463	-1.81761	-0.255022		-1.32226		-1.09417	-0.355965	-1.08305		-0.762358		-0.751588	-1.13642	-0.767683	14	0
FAM57A	-0.589749		-0.797228	-0.45086	-0.648346	-0.713262	-0.621841	-0.461469	-0.931667	-0.88581		-1.13893	-0.253296	-0.824411	-0.4064		-1.13435	-0.224787	-0.470115	-0.477113	-0.625858	-0.553419	-0.694213	-0.409681	-0.88633	-0.708002	14	0
OASL	-0.589434	-1.07581	-0.944788	-0.771498	-0.910709	-0.846918		-0.602197		-0.458646	-1.72248		-0.685579		-0.471579	-1.61434						-0.715201		-0.642078	-1.55845	-0.8919	14	0
UHRF1		-0.656165	-0.897242	-0.262315	-0.813869	-0.982127				-0.875849	0.287218	-1.02099	-1.66897			-1.19217		-0.708924	-0.589446	-1.34916		-0.983094	-1.04016	-0.268197		-1.19582	14	0
S100A12			-1.97609	-1.83077	-0.652261	-3.73112			-0.556343	-2.82777	-0.618773		-2.12143	-0.886559	-0.647677	1.552	-0.89246		-1.13439	-1.02818	-3.61756	-2.20556					14	1
IGFBP3			-0.78044	-0.689319		-0.879253	-1.66687	-0.664517	-0.371651	-2.38923	-1.24313	-0.795822	-1.67056	-1.15613	-0.552759	-1.10423	-2.11967				-1.87457		-1.00921	0.932495		-0.424395	14	1
KIF18B			-1.11174	-0.296126	-0.469045	-0.647036		-0.271827	0.483427	-1.31849		-1.14118	-1.80065			-1.22043		-0.863505	-0.655254	-0.821469	-0.633485	-0.688786	-1.22268	-0.329044	-0.912975	-0.871522	14	0
ASF1B			-0.881278		-0.682026	-0.579421				-1.34521	-0.863288	-1.16208	-1.53827	-0.302029	-0.53554	-1.20881		-0.870824	-0.644656	-0.648946	-0.690398	-0.964401	-0.266459	-0.240761	-1.1746	-0.681519	14	0
DMBX1			-1.25118	0.975697	-0.884653	0.957579	-2.40034	-0.597493			-3.43525	-2.23172	-0.845492	-0.843618	-1.22863	-1.76807						-1.44594	-1.39275	-1.07221		-1.98606	14	2
ACTN1		-0.946183	-0.63206	-0.808372	-0.297615	-1.12934	-0.732402	-1.14152		-0.64235	-1.52018	-0.548383	-0.889386	-0.879772	-0.33615	-0.659628				-0.729807	-0.830085	0.431741		-0.669467		-0.482972	14	0
SDC1			-0.971041	-1.01847	-0.215167	-2.08688	-1.10349	-0.582929	-0.793175	-0.942143	-1.27673	0.362676		-0.837072	-0.588694	-1.00225		-0.340632			-2.22713	-0.969162		-0.309487		-0.812003	14	0
MDFI		-1.17072	-1.3356	-0.716997	-0.640134	-1.00958		-0.738236				-1.06813	-1.07662	-0.665658		-0.837715	-3.40556		-0.845035			-1.05499		-0.634497	1.59792		14	1
E2F2			-1.45428	-0.458822	-0.737508			0.608116		-0.995258	-0.780008	-1.26469	-1.20812		-0.296338	-0.669147	-0.810984	-0.894222	-0.480173	-0.78236	-0.915908	-0.695901	0.635157		-1.02547	-0.977963	14	2
CCNF			-0.67485	-0.63909	-0.722104	-0.639566			0.19998	-0.619851	-0.20785	-0.910437	-0.933594			-0.762321			-0.651945	-0.888106	-0.627759	-0.894869	-0.487734	0.120815	-0.990689	-1.01684	14	0
SEC61G		-0.706086	-0.846368	-0.974039	-0.290917	-0.661555		-0.743352	-0.384519	-0.254669	-0.602496	-0.321259	-0.908336	-0.790129	-0.667554	-0.602954	-0.692212	-0.301064		-1.06948			-0.697441		-0.834898	-0.387347	14	0
MT1X		-2.53526	-0.704067	-1.11721	-0.566039	-1.35282	-1.07629	-0.999339		-1.3587	-0.531676	1.59577	-1.71557	-1.35605	-0.802415					-1.18928	-1.22331	-0.433286	-3.54458	0.915963		-1.25759	14	2
ECE2		-0.73204	-1.35136	-0.600717	-0.648058	-1.03537		-0.282671	-0.505003	-0.826012	0.398697	-0.292166	-1.23138	-0.728586	-0.658771	0.563445	0.77632	-0.472355	-0.906833	-0.951271		-0.93692	-0.739681	0.210729	-1.33279	-0.553408	14	1
SAPCD2			-1.1802		-0.574723	-0.63793			0.350531	-1.72526	0.707978	-1.54865	-1.5186	-0.621016		-1.35607	0.681198		-0.82607	-0.71233	-0.676959	-0.873745	-2.02365		-0.74811	-0.702024	14	2
ALOXE3		-1.52453	-0.360958		-1.21219	-2.64026			0.66756	-1.03866	-0.927931	-3.30901	-1.05348	-0.802041		-0.682946				-2.58845	-3.20877	-1.33877	-2.61572			-0.759319	14	1
C15orf48			0.461639				-1.64341	0.741131			-0.810399	-1.23365	-2.30202	-0.647129	-0.97067	-1.1036	-2.08984			-2.29461	-1.34224	-1.07234		-0.747476	-2.37806	-0.668204	14	1
BHLHE40		-1.08969	0.375852	-0.782734	-0.455569	-0.580976	-1.15371	-0.324292		-0.652104	-1.1539		-0.304633	-0.531029	-0.911851	-0.99413	-1.07765	-0.430625		-1.0947	-0.784305	-0.847237	-0.555682	-0.977341		-0.630241	14	0
PRKCDBP		-0.759814	-0.63269	-0.713732	-0.947614	-0.78454	-1.1947	-0.618244	-0.395073		-1.32864	-0.727345	-0.663218	-0.532013	-0.361726	-0.915755	-0.726293		-0.967287		-0.796166		-0.565			0.36284	14	0
SPRR1A		-1.05352	-3.37735	-2.03586	-2.80348	-2.12311					-0.943401	-0.934318	-0.988438						-3.57344	-2.46181	-4.04966	-6.58046			-4.07385	-3.37803	14	0
PPFIA4		-1.30565	-0.382768	-1.14	-0.485718	-2.10756	-0.573787		0.714961	-0.878789	-0.758697	-3.12092	-0.901141	-0.738676	-0.66804	-2.74878	-0.985583		-0.986148				-0.820382		-0.869944	-0.356928	14	1
CA12		-1.68587	0.677001			-2.35731	-2.12663	-1.07332		-0.885036	-0.609324	-1.39859		-1.63406	-0.975955	-1.30865	-1.4968	-0.424341		-1.65525	-1.94206	-0.796832		1.05582			14	2
SEC14L2		-1.7209	0.983049	-0.783682	-0.529357	-0.747353	-0.580074	-0.966764	-0.338389		-0.658975	1.54627	-0.807643	-1.06346	-0.551215	-1.01073	-1.09155			-1.47644	-1.28478	-0.291087		-0.704898	-1.30446		14	2
BARX1		-1.48047	-3.70509	-3.31724					-1.76704	-2.92591	-2.03475	-2.05514				-2.84048	-1.56044	-1.07695	-2.62481			1.51301	-1.21719		-5.76503	-2.32532	14	1
XIRP1		-1.20526	-1.70559		-1.05942	-1.01088	-1.06701	1.08551		-1.65174	-0.737893	-1.82076	-2.10154		-1.05492		-4.20118	1.21075		1.38737		-1.88077		-0.746523	1.10911	-0.811443	14	4
PPBP	-1.97288	-3.41259	-0.884681		-2.31509		-1.79219				-1.05317	1.77696	-2.15306	-1.06573		4.89014			-4.10172	-4.50293	-2.66012		4.91614	-2.07549		-3.69797	13	3
NEFL	-1.27057	-3.40016		-3.20148		-5.27424		-1.25546		-2.43334	-2.444	-5.04625	-2.72279								-2.34062	0.967078	-2.11033	-1.65784		-1.26744	13	1
HTR7	-1.25718	-2.35156		-2.23142		-1.97706		-1.28232			-0.952061		-1.13332	-1.55832		-1.10185				-1.3991	-2.01243	0.853398	0.890898	-0.623526	-1.87388		13	2
RNASE7	-1.13126	-2.4038	-0.474383	-1.82989		-2.39918		-0.586145	1.27558			-0.954557	-2.19401	-2.68419	1.70317				2.0112		-2.78685	-3.51719	-2.33697	-0.65834	1.24944	-0.748469	13	4
NPBWR1	-1.07492	-2.74126	-2.57941	-2.50916		-3.45219				-3.23634	-2.21398		-2.69646	-1.18064		-1.53099	-2.6845					2.38302	1.51655	-1.5847		-1.02166	13	2
AIM2	-1.0348	-2.27358	-0.941187	-1.13841	-1.09358	-1.57139		-0.65563	0.887188	-1.53129		-1.64215	-1.5119				-1.52529			-3.06908		-1.25353	1.80618				13	2
TRIML2	-1.02797	-3.57613	-2.29815	-3.00024				-2.51605	2.62048		-1.18064		-3.44575	-1.59942		-1.98099				-2.50684	-2.31713	-1.3472	-0.958466				13	1
CRCT1	-1.02078	-1.19554	-4.86136	-1.84805		-2.34934						-1.8356	-2.52985	-2.09713							-4.04637	-6.02243	-4.92291	-1.97757		-2.57124	13	0
FOLR3	-0.987113	-3.48976	-0.796897	-2.31356	-1.05374	-3.27914	-1.3982	-1.48379	2.34369		-0.977648		0.779702	-1.55222	-0.889829				-1.16743	-2.27574							13	2
IL36G	-0.984536	-5.55758	-2.34708	-1.84186	-1.92101	-3.52989								-1.55817		-2.11474					-3.01483	-2.52293		-1.34598	-1.25939	-1.83328	13	0
IL36B	-0.979348	-2.51964	-2.87619	-2.62621	-0.742105	-3.57031	-1.48824			-1.29557			-2.28608	-1.02084		-3.8685			1.4805	-2.40729		-2.93925					13	1
RAB38	-0.926617	-1.94246	-0.393682	-1.55147	-0.656317	-3.20451	-1.05271	-1.03225	-0.236042	-0.518433	-0.829018	-1.16379	-0.368383	-1.42651		-0.931821						-0.670051	-0.625197			-0.504306	13	0
NKX2-5	-0.902296	-1.93044	-2.67264	-1.54082		-2.41613	-1.15708		1.90511		-1.2661	-3.18483	-3.33207	-1.02696			1.58606	1.14936	-3.2344				-1.2105			-2.82331	13	3
G6PD	-0.834375	-1.72229	-1.02772	-0.687934	-0.448062	-1.81593	-0.370912			-1.3072	-0.412069	-2.3552	-1.05232	-1.10885	-0.30004	-0.472361	0.353172	-0.335129	-0.636584	-0.99995	-0.724695	-0.659984			-0.413833	-0.471163	13	0
GUCA1A	-0.818113	-2.67798	-2.17512	-0.775696		-1.53693			1.37156		-1.85221		-1.67347	1.11787		-2.0409	-2.43655		-1.21228			-1.82841	-0.744954		-3.18395		13	2
SLC6A15	-0.811373	-2.09708	-3.30508	-1.80583		-1.77409	1.06506	-1.05752	2.64562	-1.28276	-1.36164	-4.04588	-3.11988	-0.713539			-1.80458					1.24709	1.86304	2.3518	-4.78132		13	5
PKP1	-0.798052	-2.51398	-2.16148	-1.55624		-3.01838		-0.294622	-1.18596	-2.09132	-0.935784			-0.473115		-1.95413					-2.87913	-4.02243		-1.44383		-1.92233	13	0
CAV1	-0.793572	-2.00735	0.532398	-2.08103	-0.333866	-2.47297	-1.31348	-1.74488	-0.273391	-0.722427	-1.12067	-0.421536		-0.855131	0.400754	-1.04553	-1.64803	0.35265		-1.12351			-1.51691	-0.570885	0.903159		13	1
RHOD	-0.770533	-2.0154	-0.35148	-1.207	-0.435441	-1.88106		-1.13649			-1.71508		-0.880082	-1.19644		-1.29862		-0.222177	-0.728565		-1.99194	-1.11987	-1.55622	-0.243619		-0.494966	13	0
HAS3	-0.760963		-0.675653	-1.68287	-1.31323	-2.88649	-0.995388	-0.729704				-0.377413	0.993863	-1.23769	0.42371	-1.8313	0.415552		-0.821578			-1.48271	-2.22158	0.353374		-1.4263	13	1
FST	-0.747212	-1.64575	0.29918	-2.51822		-2.62347	-1.01855	-1.15234	0.978017		-0.722512		-1.06689	-0.60345				0.416597				-0.686202	-1.36885	-0.707159		-1.04928	13	1
CCNA1	-0.732202	-2.33367	-1.75493	1.39412		-4.96198		-1.44508	1.04867		-1.27855	-2.54323	-1.08865	-1.95729	-0.68164	1.73175		-0.543832			-1.70274	0.50789	-3.55037	-1.55601			13	3
MAD2L1	-0.729573	-0.791716	-1.1354	-0.481178	-0.518452	-0.588814		-0.499753	-0.299131	-1.15803	-0.336741	-1.08632	-2.05094	-0.309199	-0.514862	-1.14228	0.396424	-0.567894	-0.396111	-0.91014		-1.05964	-1.53871	-0.324457	-1.14605	-0.974232	13	0
HBEGF	-0.716973	-1.23531		-1.62873		-0.671303	-0.753376	-0.749486			-0.600929	-0.512068		-0.90455	-0.465635	-0.572919	-1.85615			-0.698655	-1.09587	-0.474696	-0.90557	-1.64808			13	0
DEPDC1B	-0.709591	-0.702983	-1.08248	-0.317143	-0.443031	-0.560733		-0.47483		-1.55897	-0.614092	-1.63593	-1.78851	-0.498065	-0.46912	-0.574251	-0.516732	-1.08595	-0.500933	-0.843819		-0.647055	-0.922728	-0.531662	-0.859798	-0.910306	13	0
DCUN1D5	-0.705075	-1.43221	-0.766027	-1.88949	-0.478383	-0.946387	-0.238032	-0.917104		-0.456886	-0.103608	-0.5691	-0.848071	-0.580908	-0.207912	-0.656231	-0.279144	-0.319365	-0.458101	-0.75303		-0.600012	-0.684428	-0.202786	-0.706201	-0.51407	13	0
CXCL5	-0.702131	-2.91659	-2.66408			1.60549	-1.40466	-1.92152				-3.63385	-2.05365		-2.35351		-3.35224			-4.92564		-1.13385		-2.23879	2.28662	-0.951894	13	2
ULBP3	-0.695118	-0.873247	-1.48441	-0.679137	-0.754264	-0.941539		-0.882817	-0.388649	-0.546412	-1.27071	-0.96608	-0.486503	-0.748187					-0.882373			-0.86729				-0.814728	13	0
P2RY6	-0.692799	-0.871227	-1.10623	-1.2579	-0.657286						-0.852377	-1.9547	-1.07645	-0.437555	-0.515614	-0.516377	-1.09881	-0.31053	-0.71414	-0.826479		-0.501085		-0.64421		-0.592252	13	0
ITGB6	-0.682884	-1.10907	-1.06066	-0.671104		-0.804287		-1.09605				-1.64128		-0.531445	-1.08523	-1.46191				-1.05071			1.25708	-1.06948	-1.54892	-1.52722	13	1
PERP	-0.681908	-1.42136	-0.817029	-1.06002		-2.27126	-0.692372	-0.36107	-0.565035		-0.340739		-1.01849	-0.612327		-0.925552					-1.62519	-1.0586	-2.19313	-0.802219		-0.343067	13	0
ARTN	-0.678543	-0.710984	-0.810633	-1.07869		-2.73195	0.748364	-0.532066		-1.00052		-0.736313	-1.51234	-0.77264		-0.731863			-0.590946		-1.42904	-1.08414					13	1
KIF18A	-0.677804	-1.0676	-1.15184	-0.516894	-0.389375	-0.655723		-0.50526		-1.05591	-0.696657	-1.26985	-1.36206	-0.336829	-0.363885	-1.37146		-0.502119		-1.1655		-0.663496		-0.313258	-0.636249	-0.906979	13	0
TPRXL	-0.670898	-1.18902	-1.8672		-0.943372	-2.28024			0.632238	-1.35762		-2.58908		-0.691067		-1.95398			-1.74237		-1.55088	-1.1653	-0.616505				13	1
CKS2	-0.668608	-0.803245	-1.1253	-0.620275	-0.542076	-0.607298		-0.466043	0.416845	-1.14887	-0.369123	-1.09152	-1.56848	-0.523563	-0.60751	-1.32529		-0.508506		-1.25405		-0.95347			-1.02478	-0.564852	13	0
NAMPT	-0.664727	-0.997001	-0.572367	-0.830095		-0.659963	-1.59086			-0.931019	-1.04211		-1.57688	-0.970053	-0.243336	-0.303152	-0.887552	-0.287671		-0.93383		-0.577493	-1.17752	-0.693777		-0.529872	13	0
PDPN	-0.663256	-1.44063	-0.462055	-2.05973		-2.232	-1.02438	-1.12101			-1.545	-1.16642	-1.31232	-0.825514	-0.531899		-0.991711				-1.07143	-0.424544	1.20891	-0.590596			13	1
FAM83B	-0.657941	-0.937096	-0.915742	-1.24382	-0.296459	-1.41116		-0.39741	1.95578	-1.71423		-2.41667	-1.22707	-0.827601						2.73132	-2.23069	-0.856216	-0.982843	0.356408	1.69991	-1.00927	13	3
NRN1	-0.656758	-0.822351	-0.509418			-0.918726	-1.26494			-0.668195	-1.17925		-0.475124	-1.19025		-0.762444	-1.21802			-0.74687			-1.42163	0.377731	-1.18188	-0.736352	13	0
TYMP	-0.653316	-1.7582	-0.639969	-0.891275	-1.16276	-1.47942	-0.56845	-0.509624			-1.04689		-0.446336		-0.435689	-0.82618	-1.43876			-0.986128	-1.11903	-1.06992			-1.04592	-0.464451	13	0
ADA	-0.652939	-1.14484	-0.622256	-0.95268	-0.521512	-1.04535		-0.85579	-0.294447	-0.694937		-0.791107	-0.86824	-0.418223		-0.699114	-1.86353		-0.546836			-0.692872			-1.25784	-0.373525	13	0
TKT	-0.643946	-0.925638	-1.15652	-0.871987	-0.502978	-1.26347		-0.349453		-1.02946	-0.134825	-1.25795		-0.838849	-0.250465	-0.461148		-0.491613	-0.521185	-0.698298		-0.910513	-1.54962		-1.07753	-0.655194	13	0
EPHA2	-0.641461		-0.643844	-0.735304	-0.719435			-0.391594	-0.414948		-1.30691	-0.388812	-0.457206	-0.617346	-0.43371	-1.60042	-1.00948		-0.793926			-0.94975	-1.62038	-0.615613	1.60934	-0.883668	13	1
LIF	-0.632986		-0.951186	1.04403	-0.462592	1.25637	-2.28376				-2.66639	-1.64593			-0.649626	-0.778497	-2.71209		-0.495444	-1.68277		-1.24412	-1.9849	-0.956319	0.696109	-1.33404	13	3
PADI1	-0.629946	-0.907948	-2.23135		-0.741993			0.661		-2.16215	-0.639343	2.51387				-1.97018			-1.01673	-1.46674		-1.81133	-1.57941	-1.11207		-1.38817	13	2
IFI27	-0.628247	-1.41749	-1.13606	-0.453455	-0.765802	-1.10163	0.715681	-0.668113			-0.755048		-0.421573	-0.880088	-0.826191	-1.6827				-0.692204		-0.841264			-1.66043		13	1
ME1	-0.627226	-1.44108	-1.07945	-1.30901	-0.676703	-1.49449			0.345839	-1.60654	-0.815517	-0.595759	-0.510976	-1.10023	-0.416051			-0.498686		-0.428627	-1.22682		-0.702197			-0.875796	13	0
SPAG4	-0.622643		-1.16224		-0.30865	0.771729	-1.8893		-0.642396	-1.0102	-1.39671	-1.31661	-1.20273		-1.35905	-0.773109	-0.772813	-0.347153		-1.07018	-1.1812	-0.317974					13	1
TGFB1	-0.620959	-1.40365		-1.09468	-0.775989	-1.42288	-0.519214	-0.78229	-0.454913	-1.02925	-0.39321	-1.09898	-0.247246	-0.595388		-0.548867	-1.17208	-0.269245	-0.600783	-1.1262	-0.780834			-0.447144	-0.376168	-0.315486	13	0
ZBED2	-0.613559	-2.87024	-0.406825	-0.80908	-1.06875	-2.88543		-1.14361	0.829393	-1.44598		-1.33048	-0.454301	-1.00331		-1.20693		0.56163	-2.46639			-1.4616		-0.31569		-1.23006	13	1
LMNB2	-0.609534	-0.863198	-0.914747	-0.667001	-0.541478	-0.905403		-0.369828	-0.171006	-0.263255	-0.260549	-0.995147	-1.11169	-0.384568	-0.225304	-0.751072	-0.297054	-0.381629	-0.499045	-0.622494		-0.878918	-0.801867	-0.294355	-0.863638	-0.976968	13	0
LMNB1	-0.606283	-0.600674	-0.945717		-0.500247					-1.04514		-0.90187	-1.2042		-0.343032	-0.797586	-0.579742	-0.639194	-0.498647	-0.759628		-0.962194	-1.897		-0.787424	-1.00009	13	0
POC1A	-0.605312		-0.840205		-0.774082	-0.380026	-0.405997	-0.353825		-0.906947	-0.71783	-0.345313	-1.33039	-0.448236	-0.460075	-0.993849		-0.769354	-0.563221	-1.06959	-0.721458	-1.03531		-0.353983	-1.34105	-0.82906	13	0
POLR3G	-0.604736	-1.62509	-0.823944	-1.06348	-0.601289	-1.02015		-0.632122	0.317356	-0.228389	0.297715	-0.447246	-1.11532	-0.60129		-0.66523	0.935934	-0.242632		-0.990802		-1.1294	-1.51752	0.214105		-0.253688	13	1
SPC25	-0.597102	-0.874391	-0.828408	-0.45354	-0.335709			-0.328412		-0.539794	0.444229	-1.17505	-1.74876	-0.453907	-0.63882			-0.779374		-0.93621	-0.627651	-0.769997	-0.867711	-0.35315	-1.22729	-0.976742	13	0
MKI67	-0.596882	-0.784158	-1.14495	-0.494915	-0.272716			-0.395142		-1.63842	-0.479847	-1.33958	-1.79982	-0.263667	-0.336603	-1.21969		-0.714037		-0.762986	-0.732132	-0.823008	0.706259	-0.576891	-0.82083	-0.959317	13	1
SEMA7A	-0.594826		-0.763435		-0.518278		-0.990346	-0.565432	0.274823	-0.875136	-0.652309		-1.00951			-1.53642	-1.01343		-0.579085	-1.78861		-0.690136		-0.862557	-0.829522	-0.905864	13	0
HES7	-0.593271	-0.767311	-1.43629	-1.81018	-1.39954	-0.827844		-1.02595	1.56958			-1.48137	-1.59772			-1.35698				-2.03552		-1.38561				-1.07743	13	1
PPP1R14B	-0.59041		-1.02046	-0.726108	-0.319299	-1.51911	-0.502896	-0.799816			-0.231255	-0.606813	-0.865913	-0.647861	-0.398898	-0.784593		-0.263813	-0.40953	-1.0532		-0.824895	-1.25102	-0.318157	-1.27543	-0.451735	13	0
UBE2T	-0.589187		-1.10497		-0.431579	-0.678699				-0.854578	-0.770181	-0.969298	-1.51725	-0.335601	-0.329304	-0.983466	0.49356	-0.70632	-0.457688	-0.791748		-0.92326	-0.523949	-0.248096	-1.23463	-0.646118	13	0
H2AFZ	-0.588227	-0.59622	-0.836798		-0.710956	-0.796738	-0.350767	-0.285858	-0.261014	-0.578306	-0.336331	-0.825625	-1.13918	-0.477946	-0.547422	-0.668605		-0.439604	-0.576254	-0.721676		-0.846547	-0.719396	-0.220449	-1.18007	-0.834672	13	0
PGM1		-1.17596	-0.846166	-0.748714	-0.440428	-0.330588	-0.311058	-0.568052	-0.753425	-0.61972	-0.455731	0.386773	-0.676792	-0.584728	-0.698722	-0.230569	-0.852999	-0.379999	-0.409733	-0.580412	-1.30722	-0.243819	-1.85647	-0.483051		-1.11743	13	0
SERPINH1			-0.893888	-0.501893	-0.477388	-0.817225	-0.752805	-0.622635	-0.320841	-0.502832	-1.37743	-0.728777	-0.582672	-0.651083	-0.42848	-1.11383	-1.56433	-0.255367	-0.569914	-0.589846		-0.745423	-1.21505	-0.243898	0.553531	-0.357445	13	0
BUB1B		-0.671725	-1.07768	-0.284283	-0.386154	-0.594254		-0.301714		-1.39173	-1.49403	-1.36665	-1.75635	-0.225434		-1.16246		-0.697107	-0.430178	-0.874562		-0.711988	0.503284		-0.849444	-0.889337	13	0
GSTP1		-0.865742	-1.05649	-0.789342	-0.746768	-1.52712		-0.627985			-0.227703	-0.97825		-0.719613	-0.363569	-0.75862			-0.790633			-0.699285	-0.973438	-0.189832	-0.723644	-0.304486	13	0
CDKN1A		-0.714597	-0.547668	-0.931077	-0.50965	-1.03539	-0.846118	-0.610082	-0.332605		-0.931921		-0.412485	-0.759075		-0.536497	-1.00943	-0.583965	-0.72108			-0.957862	-1.10279	-0.342885	-0.669053	-0.314074	13	0
S100A4			-0.992793	0.564191	-0.754988	0.580812	-1.00879	0.507399			-1.42857	-0.82165	-0.630893	0.343925		-1.58357	-1.83621	0.335097	-1.00188	-0.978955		-1.0872		-1.15606		-1.32564	13	1
SIGLEC12		-1.38323	-1.24179		-1.02789		-1.19245			-0.742313		-0.808949	-0.588926		-0.94895	-0.753332	-1.46545			-1.9666		-0.739705		-0.885404			13	0
NUSAP1		-0.685831	-0.98708	-0.260406	-0.393503	-0.704779				-1.21623	-0.652122	-0.814765	-1.54235	-0.239654	-0.409922	-1.12353		-0.813011	-0.386473	-0.779938		-0.792858		-0.431845	-0.849942	-0.773501	13	0
FPR1		-0.796544	-0.298278		-0.721985	0.995947	-1.11174	0.367106	-0.428482	-0.626616	-0.67975	-1.36531	-0.572102		-0.673815		-1.81856	-0.442539	-1.30364	-0.771503		-0.868793	-0.71659	-0.97092		-0.515939	13	1
TNFRSF10D		-0.777758	-0.379019	-0.870964		0.721513	-1.03745	-0.606226	-0.57614	-0.517742	-0.9251	0.423013	-0.37546	-0.704013	-0.433554	-1.01862	-1.18587		-0.564653	-1.00655	-1.4425	-0.643041	-0.819164		1.60311	-0.91129	13	2
CCDC109B		-0.895796	-0.288518	-0.540872	-0.834027	-0.748707	-0.738355	-0.547529			-1.22199	-0.956748	-0.735677	-0.393613	-0.740114	-0.266238	-0.678881			-0.579865		-0.462913	-0.808432	-0.672773	-0.735578	-0.620765	13	0
TMEM132A		-0.701965	-0.914448	-0.570596	-0.658189	-1.57285		-0.475643	-0.285806	-0.678827	-0.478228	-2.34466	-1.1326	-0.56225		-0.833194	-1.17589	-0.84694	-0.807193			-0.728251	0.66322	-0.339624	-3.06194		13	1
SLC25A5		-0.801683	-0.850475	-0.281485	-0.550725	-0.364473	-0.2644	-0.180041	0.948064	-0.581526	-0.219253	-0.432896	-0.454691	-0.642691	-0.675482		-0.596301	-0.611248	-0.841046	-0.810305		-0.584774	-1.32381		-1.16123	-0.953156	13	1
PMAIP1		-1.16767	0.399827	-0.742516	-0.850834	-0.901446		-0.335087	0.882033	-1.27324		-1.67847	-1.7155	-0.464435		-1.25643	-1.26638	-0.305613				-1.12328	-0.661148	-1.37288	-1.60326		13	1
TACC3		-0.697384	-0.912885	-0.269999	-0.575662		1.55822	-0.34369	0.286359	-0.815192	-1.02131	-1.18328	-1.26746		-0.282277	-1.058		-0.631389	-0.616381	-0.737301	-0.55904	-0.857262	-0.389576		-1.05188	-0.67395	13	1
GZMB		-2.00995	-0.929923				-0.95381		0.494536	-1.11756	-0.982424	-1.06817	-1.05802	0.944	-0.917196		-1.38481			-0.990619		-1.34344			-0.978554	-0.877367	13	1
CXCL6		-1.43196	-1.68991	-1.01072							-4.11429	-1.95291	-1.00988	-1.50037	-0.792254	0.820801	-1.28804			-2.54977	-2.02701			-1.00468	3.09624	-1.3262	13	2
RAET1E		-0.973121		-1.31205	-1.25602					-2.13311	-0.208046	-0.863638	-1.34832			-1.06049	-0.733556				-1.93174	-1.75002	-1.31047	-1.01002	-2.21172	1.20997	13	1
SLC11A1		-0.882659	-1.08128	-0.593305	-0.73643		-0.757377		0.377179		-0.888525	-1.2608		0.488148	-0.346326	-0.860286	-1.33614		-1.25198	-2.08315		-0.749746	-1.48451	-0.399181		-0.557413	13	0
NCCRP1			-2.73647	-0.84645	-1.40225			0.816605	0.925675	-5.40157	-0.776656	-2.86602	-1.75083		-1.51735	-2.81854				1.19786		-3.48311	-1.47457	-0.638897		-1.4417	13	3
ICAM5		-0.585251	-1.66121	-1.14497	-0.635084	-1.89881		-0.586418	1.27258		-1.45112	-1.34445	1.08604		0.729236	-2.16676	-1.08312			-1.2423		-0.790592		-0.464347		-1.24968	13	3
IRX4		-0.977877	-0.596745	-1.5408	-2.34991	-2.91061		-0.622902	1.17276		-1.18866		-5.18135	-0.743014	-1.70531	-2.35149	3.11836			1.99539		-1.66318			2.30591	-1.3141	13	4
CA2		-2.59982	-0.764449	-2.67831	-0.558539			-1.09774	0.960319	-1.04468	-0.861488		1.00332	-1.67603	-0.744052		-2.58194	-0.846663	0.999427	-1.63538	-2.21851					-1.62921	13	3
B4GALNT1		-1.91765	-1.46608	-0.829217		-2.77418	-1.14604	-0.619509	-1.88886	-2.38834		-0.927697	-2.05768	-1.05871	-0.992238	-0.415707				0.940015			2.37428	-0.355645		-1.74992	13	2
KRT19				-0.558861	-0.994121		-1.14679	1.07234	-0.972452			-2.21225	-1.00066	-0.702619	-0.644348	-1.47782		-0.456093	-0.739814			-1.06159	-1.51682	-1.35971		-1.06035	13	1
COL10A1			-0.391772			-1.42667	-2.36651			-3.19639	-1.53467	-1.34935	-0.935819		-0.769506	-0.805696	-1.82556	-1.2512				-1.13424		-0.95124		-1.23286	13	0
S100P			-0.851103		-0.721578	1.62828	-0.867753			-5.59826	-0.339314	-2.18011				-1.52817	-1.09902	-1.034		-3.24846	-2.44168	-0.731842	-3.83035	-0.529605		-1.56958	13	1
WNT10A		-0.888804	-0.791684	-0.700887		-1.31001	-1.2662		1.16668		-1.82639	-0.67665				-1.43645		0.369753	-1.18181	-1.26885		-1.27884	1.36281	-1.04881	-1.10593		13	2
MCEMP1		-1.09186	-2.00711		-1.20234		-1.51706	-0.468227	-0.484141			-2.9722		0.713623	-1.24425		-2.06372	-0.897166	-1.77789	-3.87752		-1.40263	-1.82249	-1.96587		-0.535704	13	1
DHCR24		-0.650559	-0.253353	-0.604112	-0.670715	-0.722217	-0.669051		-0.485179	-0.839412	-0.538545		0.266096	-0.616843	-0.509046	-0.506101	1.5295	-0.422488	-0.613515	-1.03928	-1.34696	-0.895369		-0.297749	-1.25173	-1.16395	13	1
CHRNA9		-3.1021	1.69832		0.737248	-1.87921	-1.74832	-1.13333			-3.06176	-1.96552	-1.26025		-0.890095		-4.18534			-1.99224			-1.76144		-1.34926	-2.05227	13	2
A2ML1			-3.51966		-2.77743		1.89725	0.663459	3.01066	-1.41049	0.328464		-1.61597		-0.851528	-2.79547		-0.757668	-4.14713		-3.40132	-5.60951	-0.877095		-3.14525	-0.891128	13	3
PLA2G4D		-2.17148	-0.692133	-1.44002		-1.03958		1.29902		-2.6791			-0.952281	1.91412	-0.744542	-0.800554		0.913416	1.69047		-3.46341		-1.56397	-1.20291	-1.73543	-1.95643	13	4
POSTN						-1.19167	-1.3962			-1.57379	-4.9272	-1.34157	-1.18712		-1.42364	-1.27367	-2.41544	-0.652709				-0.66489		-0.87924		-0.896799	13	0
SPRR3		-1.10671	-2.48173		-4.47862			1.92016	1.32642	-1.56005		-2.59032	-1.70684		-1.77767	-1.58549			-2.56383		-3.78184	-7.20214		-1.94257		-3.26613	13	2
